# Supplementary material for: Microarray Analysis of the Juvenile Hormone Response in Larval Integument of the Silkworm,Bombyx mori
Source: Hindawi journal article supplement (doi:10.1155/2014/426025), 2014-01-01
Supplement: f1 [file 426025.f1.zip]

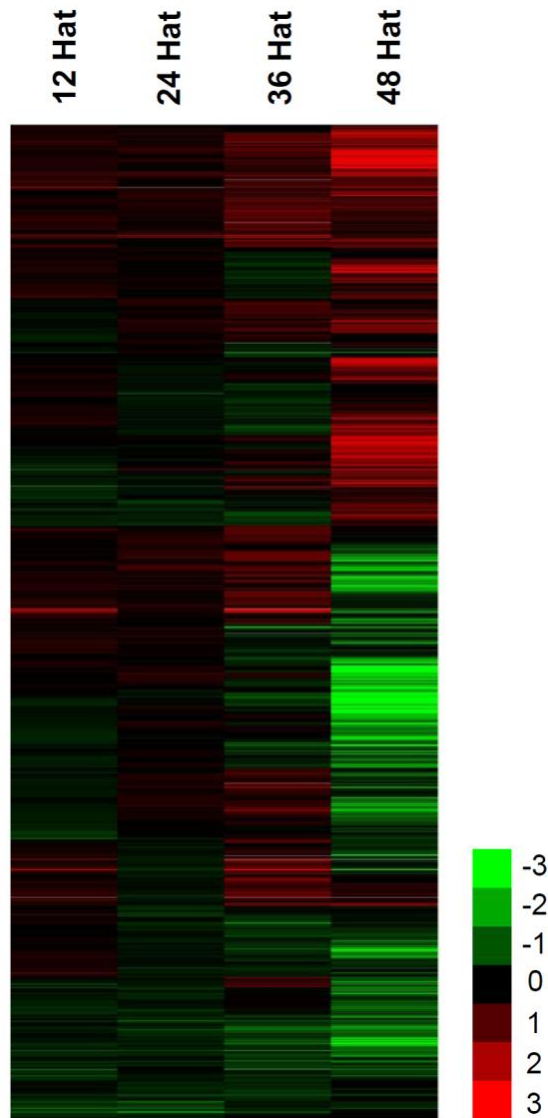

**Fig. S1 Hierarchical clustering analysis of all expressed genes in the silkworm integument**

Overall, 8,670 genes were expressed in the integuments of both JHA-induced silkworm superlarvae and controls. Hierarchical clustering of these genes is described in the Microarray analysis section of the Materials and Methods.
