# Supplementary material for: Microarray Analysis of the Juvenile Hormone Response in Larval Integument of the Silkworm, Bombyx mori
Source: Int J Genomics. 2014 Apr 6;2014:426025. doi: 10.1155/2014/426025 (PMC3997853; doi:10.1155/2014/426025)
Supplement: Supplementary file 1 — Supplementary Figure 1: Hierarchical clustering of a total of 8,670 genes expressed in the silkworm integument samples. A gene was considered to be expressed in a integument sample if its expression signal intensity was greater than 400 units. Supplementary Table 1: All real time RT-PCR primers used in this study. Supplementary Table 2: The list of 8,670 genes expressed in the silkworm integument samples. Integument-E: the integument sample treated with JHA methoprene. Integument-C: the integument sample treated with pure acetone. Supplementary Table 3: The list of 2,143 JHA-modulated genes with 2.0-fold expression change after JHA application. Supplementary Table 4: Correlation between microarray data and real time RT-PCR results. A good correlation was defined if the Pearson correlation coefficient (r) is greater than 0.7. Supplementary Table 5: All KEGG pathways that JHA-modulated genes were involved in. Supplementary Table 6: Coexpression classes of all JHA-modulated genes. Supplementary Table 7: JHA-induced genes that contain the binding motifs of Kr-h1 in their upstream UTR regions. Supplementary Table 8: JHA-modulated genes that are involved in each KEGG pathway. [file 426025.f1.zip › Supplementary materials/Table S1.xls]

## Sheet: Sheet1
Table S1 RT-PCR primers used in this study
Probe	Gene description	Gene symbol	Forward primer	Reverse primer
	Krueppel homologous protein 1	Kr-h1	5' ACCCATACTGGCGAGCGACCAT 3'	5' CCTCTCCTTTGTGTGAATACGACGG 3'
sw20525	Insulin receptor	InR	5' CCGAACTAGAAGTGTCCCAAGA 3'	5' AGTACAGCGAGTATCCGAGCAG 3'
	Phosphotidylinositol 3 kinase	PI3K	5' CGGAACGCAGAAGACTTACATC 3'	5' TATCCCGCCTAAACAGACAACC 3'
	Protein Kinase B	Akt	5' TCCCGCCGTAGATTGGT 3'	5' GATGAGCCCGAACAGCAC 3'
	4E-binding protein	4E-BP	5' ATGTTATCCCTTCGGCAATCTC 3'	5' GCTGAAGGTTTCCTGCGACTC 3'
	Ecdysone receptor	EcR	5' GATACCACTACAACGCACTGA 3'	5' GACACTCCGCCTGAAGAATC 3'
sw05025	Beta-galactosidase	BetaGal	5' CAGCCCTAAAGGTCGGTAT 3'	5' GGACTCCCTCTGTTTCGTT 3'
sw11819	Cathepsin D	CathD	5' CCCGTCTTCTCGTTCTATC 3'	5' GGGCTTCCACCTCCTT 3'
sw18931	Alpha 1,2 mannosidase		5' TTCCTCGCTGAAACACTTA 3'	5' ACTCGGTTGTCTTCTATTGG 3'
sw12347	Cathepsin B	CtsB1	5' CGACCCTGCCAATAAAGA 3'	5' ACCGAAAGCCCAACAACT 3'
sw13482	Tyrosine 3-monooxygenase	TH	5' ATGACGATGCGAAGGGTG 3'	5' GGCGAGTCTCAAGGTGCTG 3'
sw13277	Vacuolar ATP synthase subunit G	VhaG	5' CAGACAGGAGCGTGAAAGG 3'	5' AAGCGGTAGTTGATGTGGAGT 3
sw15455	Mitochondrial ATP synthase regulatory component factor B		5' ATGGCGGTAAAATCGTT 3'	5' ATGTGGGAATCCGTAGTG 3'
sw02210	26S protease regulatory subunit 7		5' GGTGCTGGCGGCGATAAT 3'	5' CGTGGATGCGGAAGATGTG 3'
sw20262	ATP synthase		5' GTGGCTTTGCGTTCAG 3'	5' GGCTCACCCCTTACAG 3'
