# Supplementary material for: Microarray Analysis of the Juvenile Hormone Response in Larval Integument of the Silkworm, Bombyx mori
Source: Int J Genomics. 2014 Apr 6;2014:426025. doi: 10.1155/2014/426025 (PMC3997853; doi:10.1155/2014/426025)
Supplement: Supplementary file 1 — Supplementary Figure 1: Hierarchical clustering of a total of 8,670 genes expressed in the silkworm integument samples. A gene was considered to be expressed in a integument sample if its expression signal intensity was greater than 400 units. Supplementary Table 1: All real time RT-PCR primers used in this study. Supplementary Table 2: The list of 8,670 genes expressed in the silkworm integument samples. Integument-E: the integument sample treated with JHA methoprene. Integument-C: the integument sample treated with pure acetone. Supplementary Table 3: The list of 2,143 JHA-modulated genes with 2.0-fold expression change after JHA application. Supplementary Table 4: Correlation between microarray data and real time RT-PCR results. A good correlation was defined if the Pearson correlation coefficient (r) is greater than 0.7. Supplementary Table 5: All KEGG pathways that JHA-modulated genes were involved in. Supplementary Table 6: Coexpression classes of all JHA-modulated genes. Supplementary Table 7: JHA-induced genes that contain the binding motifs of Kr-h1 in their upstream UTR regions. Supplementary Table 8: JHA-modulated genes that are involved in each KEGG pathway. [file 426025.f1.zip › Supplementary materials/Table S2.xls]

## Sheet: All-expresed-gene-nr
Table S2 All expressed genes in the integument
Name	Cy5 Intensity (Integument-E-12 Hat)	Cy3 Intensity (Integument-C-12 Hat)	ratio-I-12 Hat	Cy5 Intensity (Integument-E-24 Hat)	Cy3 Intensity (Integument-C-24 Hat)	ratio-I-24 Hat	Cy5 Intensity (Integument-E-36 Hat)	Cy3 Intensity (Integument-C-36 Hat)	ratio-I-36 Hat	Cy5 Intensity (Integument-E-48 Hat)	Cy3 Intensity (Integument-C-48 Hat)	ratio-I-48 Hat		Probe Annotation
sw00003	12389	9853	1.0362	13981	15500	0.918	17483	19752	0.8284	674	19044	0.0398		gi|87248661|gb|ABD36383.1| protease inhibitor 1 [Bombyx mori]
sw00004	342	497	0.9983	327	495	1.031	248	370		148	346			gi|55241584|gb|EAA08484.2| ENSANGP00000014764 [Anopheles gambiae str. PEST] ENSANGP00000014764 [Anopheles gambiae str. PEST]
sw00006	298	436	1.0002	233	458	0.9022	183	203		82	238			gi|87248343|gb|ABD36224.1| double-stranded RNA-binding zinc finger protein JAZ [Bombyx mori]
sw00009	476	608	1.0204	357	611	0.9306	581	715	0.9128	261	503	0.8241
sw00012	168	287		371	695	0.7829	12	135		23	164
sw00013	2078	2432	0.9317	2781	3233	1.006	3748	3774	0.9468	2470	1728	1.6262		gi|68356112|ref|XP_685127.1| PREDICTED: similar to membrane-associated ring finger (C3HC4) 6 [Danio rerio]
sw00014	385	524	1.0231	266	348		51	198		15	127
sw00016	560	800	0.9013	293	405	1.1927	12	102		44	175
sw00017	593	806	0.935	410	431	1.4415	482	477	1.0763	353	499	1.0542		gi|7649399|emb|CAB89085.1| transcription factor [Drosophila melanogaster]
sw00018	307	419	1.0781	182	318		66	176		18	122			gi|50759698|ref|XP_417740.1| PREDICTED: similar to GCIP-interacting protein p29 isoform 1 [Gallus gallus]
sw00020	319	443	1.0217	534	582	1.2122	259	379		105	295			gi|24586313|ref|NP_724583.1| scraps CG2092-PA, isoform A [Drosophila melanogaster] CG2092-PA, isoform A [Drosophila melanogaster]
sw00023	755	1043	0.8893	944	1104	1.0891	834	888	1.0486	174	712	0.3673		gi|28571833|ref|NP_788719.1| CG7029-PA [Drosophila melanogaster] CG7029-PA [Drosophila melanogaster]
sw00026	2503	2768	0.9346	2309	3214	0.8052	2717	2692	1.1626	3416	2771	1.3581		gi|55242567|gb|EAL40975.1| ENSANGP00000026746 [Anopheles gambiae str. PEST] ENSANGP00000026746 [Anopheles gambiae str. PEST]
sw00028	244	366		296	420	1.0415	42	149		70	193			gi|28574960|ref|NP_648096.3| unc-13-4A CG32381-PA [Drosophila melanogaster] CG32381-PA [Drosophila melanogaster]
sw00031	363	577	0.872	460	710	0.8862	502	808	0.7121	284	289			gi|1708482|sp|P52170|IMA1_XENLA Importin alpha-1 subunit (Karyopherin alpha-1 subunit) importin alpha 1a [Xenopus laevis]
sw00036	2483	2358	1.0221	3206	3513	0.9235	3617	3931	0.8418	4207	2030	2.4974
sw00037	417	420	1.3732	273	446	0.9525	464	277	2.0387	1325	575	2.3161
sw00038	909	1393	0.763	792	1150	0.8627	690	856	0.9389	790	1123	0.8307		gi|14090108|emb|CAC13866.1| MEMBRANE NUCLEASE, LIPOPROTEIN [Mycoplasma pulmonis] MEMBRANE NUCLEASE, LIPOPROTEIN [Mycoplasma pulmonis UAB CTIP]
sw00040	151	277		205	406	0.7103	94	175		64	207
sw00042	2500	2509	1.0378	2047	2107	1.0515	1536	1392	1.2215	2265	2354	0.9904		gi|22347756|gb|AAM95970.1| beta-1,3-glucan recognition protein [Plodia interpunctella] Beta-1,3-glucan-binding protein precursor (BGBP) (Beta-1,3-glucan recognition protein) (BetaGRP)
sw00044	300	345		697	733	1.149	174	263		76	199
sw00046	272	452	0.8711	181	366		127	266		34	204			gi|2984715|gb|AAC39138.1| dynamin associated protein isoform Dap160-1 [Drosophila melanogaster]
sw00047	448	570	0.9435	459	573	1.0848	362	359		410	518	0.9784		gi|5081459|gb|AAD39392.1| p55-related MAGUK protein DLG3 [Danio rerio] humpback [Danio rerio]
sw00048	822	822	1.1198	353	420	1.1365	70	154		65	159			gi|399389|sp|P21819|DIUH1_MANSE Diuretic hormone 1 precursor (DH-1) (Diuretic peptide 1) (DP-1) (Mas-DH) preprodiuretic hormone
sw00050	318	467	0.8892	157	274		32	191		44	183			gi|49250536|gb|AAH74684.1| Nuclear receptor binding protein [Xenopus tropicalis] nuclear receptor binding protein [Xenopus tropicalis]
sw00051	398	485	0.9349	203	255		96	233		67	171			gi|54643468|gb|EAL32212.1| GA11441-PA [Drosophila pseudoobscura]
sw00052	7884	7005	0.9042	13312	11014	0.9503	11723	10517	1.0173	5472	5697	0.762		gi|729730|sp|P40623|HMG1B_CHITE Mobility group protein 1B high mobility group protein 1b
sw00053	312	434	0.9962	182	287		53	198		50	194
sw00056	662	850	0.8228	954	1193	0.828	248	454	0.6118	134	586	0.3091		gi|3608259|dbj|BAA33195.1| cuticle protein [Bombyx mori]
sw00057	396	392		177	288		134	204		194	521	0.573
sw00058	349	444	1.0228	248	380		104	283		104	201			gi|78214240|gb|ABB36442.1| RE04201p [Drosophila melanogaster]
sw00059	734	687	1.1169	491	495	1.2371	363	265		324	573	0.7028		gi|6523547|emb|CAB62280.1| hydroxyproline-rich glycoprotein DZ-HRGP [Volvox carteri f. nagariensis]
sw00060	340	485	0.8432	388	511	0.9139	230	313		84	390			gi|24640586|ref|NP_572476.2| CG12125-PA [Drosophila melanogaster] RE13562p [Drosophila melanogaster] CG12125-PA [Drosophila melanogaster]
sw00062	1189	1582	0.824	652	759	0.993	303	403	0.9378	244	927	0.3354		gi|2564721|gb|AAB81850.1| chitinase [Aedes aegypti]
sw00065	373	425	1.1049	390	415	1.2294	447	424	1.137	98	421	0.3918		gi|10946612|ref|NP_067286.1| piwi like homolog 1 [Mus musculus] MIWI [Mus musculus] MIWI [Mus musculus]
sw00067	390	407	1.0682	253	308		64	147		90	185			gi|27819907|gb|AAL39806.2| LD43989p [Drosophila melanogaster]
sw00070	1183	1167	1.0558	1189	1003	1.2697	717	537	1.5495	828	557	1.9398		gi|24651998|ref|NP_724755.1| Suppressor of variegation 2-10 CG8068-PB, isoform B [Drosophila melanogaster] CG8068-PB, isoform B [Drosophila melanogaster]
sw00071	449	421	1.1824	253	313		41	197		73	203
sw00073	751	728	1.1435	608	689	1.0571	512	369	1.4971	2775	632	4.8787		gi|2506798|sp|P08922|ROS_HUMAN Proto-oncogene tyrosine-protein kinase ROS precursor (c-ros-1) transmembrane tyrosine-specific protein kinase precursor
sw00076	1680	1674	0.9134	2260	1219	1.6238	2314	1049	2.0803	1239	2185	0.5711		gi|40675335|gb|AAH64870.1| Nolc1-prov protein [Xenopus tropicalis]
sw00079	388	602	0.6434	195	326		163	384		160	262
sw00084	169	319		401	437	0.9983	236	296		77	257			gi|49522839|gb|AAH73969.1| NEFH protein [Homo sapiens] neurofilament protein [Homo sapiens] Neurofilament triplet H protein (200 kDa neurofilament protein) (Neurofilament heavy polypeptide) (NF-H)
sw00085	1113	1262	0.9039	1162	1166	1.1207	786	772	1.0727	179	909	0.2625		gi|86563230|ref|NP_001033372.1| T15B12.1b [Caenorhabditis elegans]
sw00086	689	791	0.9894	674	618	1.253	198	252		195	352			gi|20147713|gb|AAM12624.1| Ras family small GTP binding protein RALA [Homo sapiens] GTP-binding protein (ral)
sw00090	1174	1400	0.8747	1355	1330	1.0985	709	1002	0.8166	426	863	0.6332		gi|55240386|gb|EAA09651.3| ENSANGP00000018650 [Anopheles gambiae str. PEST] ENSANGP00000018650 [Anopheles gambiae str. PEST]
sw00096	728	756	1.0051	454	393	1.2368	78	242		120	253			gi|73973963|ref|XP_539071.2| PREDICTED: similar to candidate tumor suppressor protein [Canis familiaris]
sw00098	11556	8638	1.1537	13650	10627	1.2666	9584	8494	1.3083	2676	8270	0.342
sw00099	411	474	1.0226	370	510	0.8909	177	297		180	366			gi|72104672|ref|XP_785740.1| PREDICTED: similar to putative cytoplasmic protein of eukaryotic origin (5S122) [Strongylocentrotus purpuratus]
sw00105	1853	1599	1.2363	2128	2274	0.9801	1691	1671	1.047	2124	2064	1.1039		gi|51765031|ref|XP_135030.5| PREDICTED: inhibitor of Bruton's tyrosine kinase isoform 1 [Mus musculus] PREDICTED: inhibitor of Bruton's tyrosine kinase isoform 4 [Mus musculus] PREDICTED: inhibitor of Bruton's tyrosine kinase isoform 2 [Mus musculus] PREDICTED: similar to inhibitor of Brutons tyrosine kinase isoform 15 [Mus musculus] PREDICTED: similar to inhibitor of Brutons tyrosine kinase isof…
sw00110	527	797	0.7625	517	816	0.7189	433	1056	0.4989	2661	538	5.8911		gi|20129297|ref|NP_609080.1| CG10806-PB, isoform B [Drosophila melanogaster] CG10806-PB, isoform B [Drosophila melanogaster]
sw00112	359	333		392	456	1.0097	298	297		358	441	1.2497
sw00113	1314	1662	0.9162	1606	1575	1.1651	765	776	1.0868	529	978	0.7165
sw00114	2504	2612	0.997	3128	3221	1.0243	2300	2097	1.1957	889	1436	0.7646
sw00115	461	575	0.9182	655	706	1.0524	138	213		277	361
sw00116	273	356		415	463	0.985	138	292		192	423	0.8359		gi|68385170|ref|XP_691728.1| PREDICTED: similar to phosphatidylinositol 4-kinase b [Danio rerio]
sw00117	371	462	1.0826	475	649	0.8972	61	189		104	253			gi|59807540|gb|AAH90062.1| ARID2 protein [Homo sapiens]
sw00118	1480	2012	0.7784	1737	2063	0.922	1111	1723	0.7725	289	1219	0.3256		gi|54643924|gb|EAL32667.1| GA17712-PA [Drosophila pseudoobscura]
sw00119	290	406	0.8884	308	462	0.8346	32	224		70	181			gi|66499360|ref|XP_396507.2| PREDICTED: similar to CG11550-PA [Apis mellifera]
sw00121	539	831	0.8054	689	814	1.0031	232	282		56	349
sw00123	1359	1555	0.8303	1330	1667	0.8286	257	390		613	931	0.7977
sw00125	4653	3698	1.2972	4788	3259	1.6627	4201	2027	2.2995	4142	3908	1.0473		gi|20151563|gb|AAM11141.1| LD15253p [Drosophila melanogaster]
sw00126	410	473	1.1088	436	550	0.9947	100	220		94	214
sw00128	416	491	0.9525	552	529	1.1102	78	186		179	380			gi|72133877|ref|XP_788695.1| PREDICTED: similar to predicted CDS, reverse transcriptase family member (1O881) [Strongylocentrotus purpuratus]
sw00129	253	371		392	503	1.008	60	190		53	149
sw00132	3210	2682	1.0479	5308	4086	1.1632	3850	3301	1.2562	14587	2496	8.7852		gi|17552910|ref|NP_498263.1| ALdehyde deHydrogenase family member (alh-9) [Caenorhabditis elegans] Putative aldehyde dehydrogenase family 7 member A1 homolog
sw00133	246	341		289	405	0.9915	48	178		42	171
sw00134	1055	1225	0.9796	1105	1190	1.0708	319	403	1.0722	592	795	1.0684
sw00135	328	410	0.963	462	529	1.0027	43	230		99	155			gi|290260|gb|AAA99871.1| phosphoprotein phosphatase 2A 55 kDa regulatory subunit
sw00137	331	378		1201	599	2.3653	31	375		28	404	0.2751		gi|87248419|gb|ABD36262.1| larval cuticle protein [Bombyx mori]
sw00138	1120	1198	1.0633	961	1108	1.0125	374	666	0.7659	188	409	0.815		gi|53850458|dbj|BAD38896.2| outer arm dynein binding protein [Anthocidaris crassispina]
sw00139	934	1180	0.7878	1030	956	1.1581	185	410	0.6578	109	1030	0.1291		gi|1706194|sp|P80683|CUA3A_TENMO Larval cuticle protein A3A (TM-A3A) (TM-LCP A3A)
sw00140	161	183		364	449	0.9293	128	201		103	239			gi|66500529|ref|XP_392121.2| PREDICTED: similar to thrombospondin repeat protein 1 [Apis mellifera]
sw00141	614	739	0.9903	533	653	0.9935	272	398		343	252			gi|25989211|gb|AAL31707.1| prophenoloxidase activating factor 3 [Bombyx mori]
sw00143	319	366		768	708	1.2049	239	322		74	197			gi|72085109|ref|XP_794280.1| PREDICTED: similar to Low affinity immunoglobulin epsilon Fc receptor (Lymphocyte IGE receptor) (Fc-epsilon-RII) (CD23) [Strongylocentrotus purpuratus]
sw00145	339	445	0.9685	337	417	1.0137	54	201		66	183			gi|62654708|ref|XP_236932.3| PREDICTED: similar to tight junction protein 4 (peripheral) [Rattus norvegicus]
sw00147	293	382		442	493	1.049	62	215		89	215
sw00148	11567	11727	0.7078	15986	13577	0.9539	10879	15931	0.7822	5153	11616	0.3924		gi|45550893|ref|NP_652593.3| CG31676-PA [Drosophila melanogaster] RH34376p [Drosophila melanogaster] CG31676-PA [Drosophila melanogaster]
sw00149	2854	1880	1.4097	4097	3123	1.2048	8527	3292	2.3478	13878	801	13.5394		gi|60677859|gb|AAX33436.1| RE32747p [Drosophila melanogaster]
sw00155	228	331		379	416	1.1029	20	210		44	168			gi|2506222|sp|P17290|TPH1_RABIT Tryptophan 5-hydroxylase 1 (Tryptophan 5-monooxygenase 1)
sw00156	585	678	0.8759	682	570	1.2462	262	451	0.7835	171	472	0.5829		gi|76363397|sp|Q924D0|RT4I1_MOUSE Reticulon-4-interacting protein 1, mitochondrial precursor (NOGO-interacting mitochondrial protein)
sw00157	1935	2194	0.8856	2112	1989	1.0471	1161	1154	1.0336	643	1466	0.5583		gi|25012857|gb|AAN71517.1| RH07443p [Drosophila melanogaster]
sw00158	213	392		311	427	0.9363	65	212		56	204			gi|48096697|ref|XP_392500.1| PREDICTED: similar to Ras-related protein Rab-3 [Apis mellifera] PREDICTED: similar to Ras-related protein Rab-3 [Apis mellifera]
sw00159	470	559	0.8691	561	557	1.1301	149	203		320	239			gi|2935153|gb|AAC05080.1| odd Oz product [Drosophila melanogaster]
sw00161	446	507	1.0211	396	411	1.2161	125	244		170	331			gi|29476833|gb|AAH48280.1| ARHGAP8 protein [Homo sapiens]
sw00165	247	357		368	413	1.1294	41	212		76	149			gi|77403907|gb|ABA81832.1| LP14275p [Drosophila melanogaster]
sw00166	297	319		384	428	1.0872	68	131		76	187			gi|4928444|gb|AAD33588.1| G/T mismatch-specific thymine DNA glycosylase [Drosophila melanogaster]
sw00167	305	389		475	526	1.0003	45	205		60	244			gi|13273500|gb|AAK15810.1| vitellogenin receptor [Aedes aegypti] putative vitellogenin receptor [Aedes aegypti]
sw00168	238	242		321	401	0.8638	79	209		78	251
sw00169	390	469	0.9865	522	547	1.149	91	217		84	231
sw00173	1548	1605	0.9593	1935	2139	0.905	1346	1586	0.9239	1837	1188	1.7132		gi|66504263|ref|XP_396615.2| PREDICTED: similar to CG9066-PA [Apis mellifera]
sw00175	246	371		346	441	0.9135	39	192		36	190
sw00176	1066	1577	0.6089	800	662	1.1906	812	527	1.6888	227	698	0.4632		gi|15145362|gb|AAA28050.2| Aconitase protein 2, isoform a [Caenorhabditis elegans] ACOnitase family member (aco-2) [Caenorhabditis elegans] Probable aconitate hydratase, mitochondrial precursor (Citrate hydro-lyase) (Aconitase)
sw00177	341	419	0.9246	279	358		2454	256	8.642	29	447	0.2075		gi|6560647|gb|AAF16701.1| putative cuticle protein [Manduca sexta]
sw00179	961	754	1.1796	722	757	0.9696	322	336		276	475	0.7975		gi|14602871|gb|AAH09934.1| Mitochondrial intermediate peptidase [Homo sapiens]
sw00181	817	997	0.8285	559	623	1.0238	793	692	1.3136	518	613	1.1204		gi|73973953|ref|XP_539065.2| PREDICTED: similar to blood vessel epicardial substance [Canis familiaris]
sw00182	831	879	1.0731	932	872	1.1093	280	408	0.8369	232	474	0.795		gi|13509385|gb|AAK28042.2| transmembrane receptor Roundabout1 [Danio rerio] roundabout homolog 1 [Danio rerio]
sw00183	813	979	0.7747	337	736	0.4554	131	346		229	534	0.5811		gi|8248423|gb|AAF74193.1| Netrin receptor DUnc5 [Drosophila melanogaster]
sw00185	2725	2416	1.0156	2622	2954	0.8878	2175	3152	0.7673	3534	2183	1.5717		gi|72006261|ref|XP_782504.1| PREDICTED: similar to translocase of outer mitochondrial membrane 20 homolog [Strongylocentrotus purpuratus]
sw00187	578	519	1.0958	504	537	0.9852	140	261		117	217			gi|3892193|gb|AAC78306.1| cytoplasmic dynein intermediate chain isoform [Drosophila melanogaster]
sw00189	100	221		380	475	0.9733	295	786	0.5183	7	156			gi|66554040|ref|XP_395531.2| PREDICTED: similar to ENSANGP00000014304 [Apis mellifera]
sw00190	2435	2685	0.9307	3400	2383	1.3274	2941	2194	1.399	2773	2616	1.1894		gi|72089082|ref|XP_787949.1| PREDICTED: similar to nuclear matrix protein SNEV [Strongylocentrotus purpuratus]
sw00193	280	429	0.954	218	466	0.8415	108	263		39	164
sw00194	174	412	0.685	173	460	0.7148	61	177		50	235
sw00195	1512	1542	1.1365	1742	2006	1.1292	2577	2043	1.2244	1614	1563	1.08		gi|76654835|ref|XP_884721.1| PREDICTED: similar to Alpha-centractin (Centractin) (Centrosome-associated actin homolog) (Actin-RPV) (ARP1) isoform 9 [Bos taurus]
sw00196	329	493	0.9698	265	449	0.9709	211	317		146	396
sw00197	688	830	1.0116	408	564	1.1128	337	420	0.99	105	515	0.3884		gi|25012361|gb|AAN71290.1| RE08130p [Drosophila melanogaster]
sw00199	2886	2049	1.4834	1254	2502	0.6621	1634	1634	1.0042	1723	1840	0.957		gi|56378317|dbj|BAD74195.1| heat shock protein hsp 19.9 [Bombyx mori]
sw00200	301	486	0.9101	405	634	0.9382	153	325		110	299
sw00201	238	423	0.8578	143	367		59	239		29	208
sw00203	7582	5042	1.3477	8130	7234	1.2305	9375	7766	1.1272	1371	8550	0.1603		gi|34100930|gb|AAQ57577.1| troponin C 73F [Drosophila virilis]
sw00204	161	451	0.5764	214	444	0.8289	94	398		68	319			gi|66518992|ref|XP_396537.2| PREDICTED: similar to DNA ligase III (Polydeoxyribonucleotide synthase [ATP]) [Apis mellifera]
sw00205	728	725	1.2052	485	768	0.9424	555	649	0.9747	270	396			gi|66529744|ref|XP_623739.1| PREDICTED: similar to mitogen-activated protein kinase organizer 1 [Apis mellifera]
sw00206	416	475	1.2168	308	448	1.1589	236	183		172	375
sw00208	1255	1316	1.111	1615	1725	1.1503	1776	1614	1.0454	1031	1278	0.8656		gi|25009699|gb|AAN71025.1| AT04516p [Drosophila melanogaster]
sw00209	217	442	0.7388	181	277		210	282		174	248
sw00210	665	926	0.8701	613	888	0.9073	909	987	1.1177	1082	703	2.0338
sw00211	275	436	0.9401	190	355		158	273		64	250			gi|72111920|ref|XP_800568.1| PREDICTED: hypothetical protein XP_795475, partial [Strongylocentrotus purpuratus]
sw00212	228	379		331	444	1.0746	34	256		94	268
sw00214	793	912	1.0498	985	1200	1.0035	1193	722	2.1127	740	633	1.6496
sw00215	460	657	0.93	407	511	1.139	1145	860	1.4783	437	325	1.7497		gi|56427966|gb|AAV91250.1| translocation protein 1 [Drosophila santomea]
sw00221	1259	1584	0.913	1238	1443	1.0605	1588	1384	1.1324	931	944	1.1713		gi|73983932|ref|XP_533297.2| PREDICTED: similar to Heat shock 70 kDa protein 4L (Osmotic stress protein 94) (Heat shock 70-related protein APG-1) isoform 1 [Canis familiaris]
sw00222	252	373		198	475	0.7246	83	176		264	231			gi|62638376|ref|XP_220112.3| PREDICTED: similar to chromosome 6 open reading frame 192 [Rattus norvegicus]
sw00224	345	527	0.8975	422	596	0.9382	201	314		149	324			gi|76636031|ref|XP_588290.2| PREDICTED: similar to FCH and double SH3 domains 2 isoform 1 [Bos taurus]
sw00225	1944	1864	1.1203	1509	1379	1.2966	2082	1255	1.6462	1660	1652	0.944		gi|28972560|dbj|BAC65696.1| mKIAA0979 protein [Mus musculus]
sw00226	1244	1250	1.0973	1146	1700	0.8049	1182	1467	0.8815	952	1293	0.8473		gi|77735647|ref|NP_001029519.1| histone acetyltransferase 1 [Bos taurus] histone acetyltransferase 1 [Bos taurus]
sw00228	276	442	0.7928	240	466	0.6889	424	259	1.9764	96	339
sw00232	2116	1911	1.1123	3042	3401	0.9069	2777	2840	0.911	2064	1902	1.2542		gi|37589673|gb|AAH59493.1| COP9 constitutive photomorphogenic homolog subunit 5 [Danio rerio] COP9 constitutive photomorphogenic homolog subunit 5 [Danio rerio] COP9 signalosome complex subunit 5 (Signalosome subunit 5)
sw00234	868	832	1.2109	574	655	1.1454	218	312		59	690	0.1676		gi|3493321|gb|AAC33365.1| delayed rectifier potassium channel [Drosophila melanogaster]
sw00236	3690	2519	1.4479	2528	2809	0.9328	3316	2505	1.2496	1477	2515	0.6094
sw00237	371	540	0.9097	189	365		153	294		409	209	2.5718		gi|62721718|gb|AAX94285.1| neurotrophic tyrosine kinase receptor precursor [Branchiostoma floridae]
sw00238	303	464	0.9232	186	393		52	184		15	179
sw00239	364	446	1.0288	324	472	1.0071	96	243		52	240			gi|24654209|ref|NP_611143.1| CG5065-PA [Drosophila melanogaster] CG5065-PA [Drosophila melanogaster]
sw00240	323	441	0.9285	537	706	0.9176	256	407	0.7302	158	383			gi|55637015|ref|XP_508774.1| PREDICTED: similar to multi-transmembrane domain immunoglobulin-like protein [Pan troglodytes]
sw00244	188	280		502	477	1.1975	14	108		160	271
sw00246	303	421	0.9501	253	337		77	198		69	183			gi|73970468|ref|XP_538560.2| PREDICTED: similar to protein geranylgeranyltransferase type I, beta subunit isoform 1 [Canis familiaris]
sw00247	741	690	1.121	349	405	1.155	300	280		775	441	2.0365		gi|47681489|gb|AAT37510.1| furin-like convertase [Trichoplusia ni]
sw00248	236	336		283	441	0.8444	68	194		82	206
sw00249	2977	2931	1.0111	2275	2183	1.124	2618	1908	1.3165	2983	3146	0.9148		gi|82799714|ref|XP_929387.1| PREDICTED: similar to Spectrin alpha chain, brain (Spectrin, non-erythroid alpha chain) (Alpha-II spectrin) (Fodrin alpha chain) isoform 35 [Mus musculus] PREDICTED: similar to Spectrin alpha chain, brain (Spectrin, non-erythroid alpha chain) (Alpha-II spectrin) (Fodrin alpha chain) isoform 18 [Mus musculus]
sw00250	859	1036	0.9607	711	809	1.0069	211	431	0.5863	82	275
sw00251	380	508	0.8521	361	411	1.1678	95	251		109	272			gi|3004663|gb|AAC28410.1| sluggish [Drosophila melanogaster]
sw00253	314	467	0.9242	231	376		105	204		67	243			gi|55638153|ref|XP_522400.1| PREDICTED: similar to CSAD protein [Pan troglodytes]
sw00255	353	423	0.9746	295	363		115	272		139	186
sw00256	291	688	0.4944	426	519	0.9669	620	482	1.2562	567	544	1.2881
sw00257	657	733	1.0143	525	607	1.0609	391	410	1.0498	529	435	1.6172
sw00258	506	641	0.9379	252	370		193	297		150	334			gi|76880417|dbj|BAE45705.1| winged eye [Drosophila melanogaster]
sw00260	999	1077	0.8959	1574	1051	1.3725	316	397		201	601	0.4557		gi|30387859|gb|AAP32223.1| GTP-binding protein Golf alpha subunit [Rattus norvegicus] Guanine nucleotide-binding protein G(olf), alpha subunit (Adenylate cyclase-stimulating G alpha protein, olfactory type)
sw00261	1102	1097	1.0554	1029	1205	0.9747	872	820	1.0681	808	831	1.1602		gi|54311326|gb|AAH84871.1| LOC495399 protein [Xenopus laevis]
sw00265	770	932	0.9154	780	764	1.1853	1070	610	1.7719	410	334	1.7249		gi|53734258|gb|AAH83745.1| Tusc4 protein [Rattus norvegicus]
sw00266	561	762	0.8579	334	450	0.9978	174	239		67	412	0.3322		gi|12053709|emb|CAC20419.1| a disintegrin-like and metalloprotease (reprolysin type) with thrombospondin type 1 motif, 12 [Homo sapiens] ADAMTS-12 precursor (A disintegrin and metalloproteinase with thrombospondin motifs 12) (ADAM-TS 12) (ADAM-TS12)
sw00267	915	850	1.0431	500	587	0.9965	250	283		218	463	0.6858		gi|76650520|ref|XP_884458.1| PREDICTED: similar to general transcription factor II H, polypeptide 4 isoform 3 [Bos taurus]
sw00268	1311	1509	0.8088	2884	2258	1.1193	1525	1076	1.3858	1174	1283	1.0406		gi|54038587|gb|AAH84286.1| LOC495111 protein [Xenopus laevis]
sw00270	358	521	0.8787	249	393		190	299		132	270
sw00271	2703	2182	1.0652	1919	1535	1.29	1568	1199	1.3621	2595	1900	1.3582		gi|76638931|ref|XP_884379.1| PREDICTED: similar to restin isoform 5 [Bos taurus]
sw00274	373	424	1.1211	454	511	1.0757	28	137		73	233
sw00275	953	959	0.9916	767	803	1.0384	603	691	0.9884	349	554	0.9068
sw00277	494	546	1.0424	460	558	1.0764	239	301		195	297
sw00278	340	402	1.0912	305	400	0.9983	89	180		62	266			gi|391615|dbj|BAA04087.1| Antennapedia homologue protein [Bombyx mori]
sw00282	549	703	0.9106	329	475	0.8756	222	358		229	538	0.6228		gi|76654177|ref|XP_595677.2| PREDICTED: similar to Protein C7orf26 homolog [Bos taurus]
sw00284	550	569	1.0584	555	816	0.7041	563	812	0.7451	277	503	0.7619		gi|67846976|gb|AAY82180.1| CG6547 [Drosophila melanogaster]
sw00285	1523	1496	1.0154	2229	2621	0.8766	1950	2268	0.8216	2650	1322	1.9478		gi|68396074|ref|XP_709061.1| PREDICTED: similar to transmembrane trafficking protein isoform 2 [Danio rerio]
sw00286	5273	5134	0.9286	4230	4737	0.8959	5564	5138	1.3184	7719	4327	1.8718		gi|62642842|ref|XP_226722.3| PREDICTED: similar to zinc transporter 5 [Rattus norvegicus]
sw00287	1434	1445	0.932	1383	1158	1.1878	1376	1107	1.3754	831	1137	0.8915		gi|38141765|dbj|BAD00701.1| TIA-1 homologue [Bombyx mori]
sw00288	506	940	0.5574	862	1372	0.6258	92	558	0.2302	39	952	0.0778		gi|25012317|gb|AAN71270.1| LP05231p [Drosophila melanogaster]
sw00289	247	324		380	466	1.0403	50	192		111	156			gi|76156731|gb|AAX27876.2| SJCHGC08667 protein [Schistosoma japonicum]
sw00291	371	460	0.958	335	383		51	212		76	233			gi|66557473|ref|XP_395630.2| PREDICTED: similar to retinitis pigmentosa GTP-ase regulator RPGR [Apis mellifera]
sw00293	247	344		331	484	0.8871	29	183		50	203
sw00294	249	405	0.7972	337	412	1.0636	39	138		28	169			gi|27368143|gb|AAN87269.1| ORF [Drosophila melanogaster]
sw00296	279	388		481	662	0.8071	245	362		212	239
sw00297	569	773	0.8993	636	749	1.001	340	444	0.9213	164	477	0.4979		gi|18916402|dbj|BAB85498.1| 18 wheeler [Bombyx mori]
sw00299	748	1025	0.752	493	890	0.5903	452	977	0.5338	497	1424	0.4627		gi|66509665|ref|XP_397030.2| PREDICTED: similar to bystin [Apis mellifera]
sw00302	485	610	0.9395	503	665	0.8938	153	497	0.4326	720	377	2.7502		gi|6984241|gb|AAF34808.1| SP558 protein [Drosophila melanogaster]
sw00303	293	388		438	467	1.1748	42	201		73	257
sw00304	272	338		350	624	0.6467	314	216		1928	518	4.1314		gi|89268696|emb|CAJ82714.1| very low density lipoprotein receptor [Xenopus tropicalis]
sw00305	3730	4016	0.9702	4933	6224	0.7912	3770	3938	1.0436	12718	2559	5.3804		gi|66511664|ref|XP_392823.2| PREDICTED: similar to elongation factor Tu GTP binding domain containing 1, partial [Apis mellifera]
sw00306	6488	7933	0.7718	6233	6392	0.9803	5341	4832	1.1717	11017	4136	2.4718		gi|87248239|gb|ABD36172.1| transketolase [Bombyx mori]
sw00307	244	318		376	438	1.0653	77	206		87	181			gi|24650510|ref|NP_651528.1| CG14257-PA [Drosophila melanogaster] CG14257-PA [Drosophila melanogaster]
sw00309	198	336		302	463	0.8716	76	146		102	201			gi|24656428|ref|NP_728806.1| CG11486-PD, isoform D [Drosophila melanogaster] CG11486-PB, isoform B [Drosophila melanogaster] CG11486-PA, isoform A [Drosophila melanogaster] CG11486-PD, isoform D [Drosophila melanogaster] CG11486-PB, isoform B [Drosophila melanogaster] CG11486-PA, isoform A [Drosophila melanogaster]
sw00310	279	400	0.9498	350	507	0.8901	105	324		82	265			gi|6458692|gb|AAF10542.1| GMC oxidoreductase [Deinococcus radiodurans R1] GMC oxidoreductase [Deinococcus radiodurans R1]
sw00311	381	483	0.9394	388	422	1.1474	41	217		91	197			gi|57506558|dbj|BAD86650.1| reverse transcriptase [Bombyx mori]
sw00312	168	247		433	437	1.0978	107	197		153	292			gi|55659325|ref|XP_514974.1| PREDICTED: similar to Integral membrane protein DGCR2/IDD precursor [Pan troglodytes]
sw00313	328	406	1.1204	322	453	0.958	105	142		156	214			gi|73960299|ref|XP_849799.1| PREDICTED: similar to Kinesin family member 21B [Canis familiaris]
sw00314	372	527	0.8912	722	743	1.1578	167	258		232	312
sw00316	403	532	0.845	612	500	1.3085	171	272		309	614	0.8173		gi|220659|dbj|BAA14397.1| dihydrolipoamide succinyltransferase [Rattus norvegicus]
sw00318	371	521	0.9024	617	629	1.1957	58	259		70	257			gi|61806554|ref|NP_001013510.1| hypothetical protein LOC541365 [Danio rerio] Zgc:110777 [Danio rerio]
sw00321	290	434	0.9217	362	464	1.0308	90	241		86	264
sw00322	666	759	1.0757	904	974	1.1021	170	341		167	441	0.6793		gi|8923846|ref|NP_060900.1| translin-associated factor X interacting protein 1 [Homo sapiens] unknown [Homo sapiens] TSNAXIP1 protein [Homo sapiens]
sw00323	981	955	1.0438	981	915	1.1586	359	470	1.047	299	519	0.7782		gi|27374366|gb|AAO01105.1| CG12134-PA [Drosophila willistoni]
sw00325	385	583	0.8567	576	586	1.2125	211	195		45	448	0.3143		gi|38045898|ref|NP_829884.1| RAB6-interacting protein 2 isoform epsilon [Homo sapiens] ELKS epsilon [Homo sapiens] RAB6-interacting protein 2 (ERC protein 1)
sw00326	356	436	1.1199	620	642	1.2154	75	219		67	220
sw00327	546	635	0.9518	596	608	1.1065	232	351		235	279
sw00329	223	407	0.7913	252	393		53	161		31	159
sw00330	1943	1573	1.3555	1269	1629	0.8594	1623	953	1.8669	957	1035	1.2371		gi|66524353|ref|XP_397022.2| PREDICTED: similar to carboxylesterase [Apis mellifera]
sw00332	5372	4104	1.0897	6715	5643	1.0348	4781	4817	1.0853	6197	4460	1.6107		gi|55245443|gb|EAA04375.2| ENSANGP00000009437 [Anopheles gambiae str. PEST] ENSANGP00000009437 [Anopheles gambiae str. PEST]
sw00334	446	522	1.1312	719	805	1.0897	83	195		60	283			gi|56199440|gb|AAV84209.1| chymotrypsin [Culicoides sonorensis]
sw00335	257	333		379	450	1.0013	47	193		63	211			gi|56798156|dbj|BAD82946.1| non-LTR retrotransposon R1Bmks ORF2 protein [Bombyx mori]
sw00336	1496	1842	0.7678	1933	2260	0.767	1561	2102	0.8322	1590	2086	0.9046		gi|18921203|ref|NP_573338.1| CG7332-PA [Drosophila melanogaster] LD24478p [Drosophila melanogaster] CG7332-PA [Drosophila melanogaster]
sw00337	271	375		213	444	0.6819	66	300		380	216			gi|53734492|gb|AAH83581.1| Methylcrotonoyl-Coenzyme A carboxylase 2 (beta) (predicted) [Rattus norvegicus] methylcrotonoyl-Coenzyme A carboxylase 2 (beta) (predicted) [Rattus norvegicus]
sw00338	2974	2672	1.1437	2882	3631	0.7941	1777	3128	0.6406	2894	3416	0.8609		gi|73586862|gb|AAI03209.1| Pyridoxine 5'-phosphate oxidase [Bos taurus] pyridoxine 5'-phosphate oxidase [Bos taurus] Pyridoxine-5'-phosphate oxidase (Pyridoxamine-phosphate oxidase) pyridoxine 5'-phosphate oxidase [Bos taurus]
sw00339	249	329		384	405	1.1506	67	233		49	195
sw00342	275	306		103	249		139	186		20	507	0.1304
sw00343	681	688	0.9771	497	586	0.9636	198	404	0.6973	321	424	1.1065		gi|78214226|gb|ABB36435.1| RE58741p [Drosophila melanogaster]
sw00345	793	976	0.9303	475	581	0.9544	75	247		41	244			gi|86450717|gb|ABC96694.1| yellow1 [Bombyx mori]
sw00347	298	425	0.7832	499	565	1.0056	73	207		52	175
sw00348	13106	15441	0.5893	21677	24381	0.6964	6908	22523	0.3592	3904	13921	0.2348
sw00349	289	446	0.8523	314	412	0.9713	124	221		52	175			gi|82885674|ref|XP_923397.1| PREDICTED: similar to Unc-112 related protein 1 (Kindlin-1) isoform 7 [Mus musculus]
sw00350	318	403	1.03	186	335		48	134		80	207			gi|8099212|gb|AAF72065.1| RNA polymerase III transcription factor BRF [Drosophila melanogaster]
sw00351	719	758	0.9178	994	929	1.1122	123	331		110	336
sw00352	307	339		358	411	0.9937	179	377		115	321			gi|76630587|ref|XP_872931.1| PREDICTED: similar to early estrogen-induced gene 1 protein [Bos taurus]
sw00353	299	396		242	348		405	591	0.8387	119	287			gi|87248443|gb|ABD36274.1| Wnt inhibitory factor 1 precursor [Bombyx mori]
sw00354	1347	1723	0.8391	1431	1320	1.1571	761	721	1.0705	866	1229	0.7408		gi|76619562|ref|XP_586012.2| PREDICTED: similar to Phenylalanyl-tRNA synthetase beta chain (Phenylalanine--tRNA ligase beta chain) (PheRS) [Bos taurus]
sw00355	3108	2790	0.9389	2081	2090	0.9675	1734	1907	0.9667	454	2031	0.2821		gi|41349770|dbj|BAD08319.1| decapentaplegic protein [Athalia rosae]
sw00356	195	286		403	432	0.9857	57	222		67	223			gi|72010964|ref|XP_784917.1| PREDICTED: similar to carbohydrate (keratan sulfate Gal-6) sulfotransferase 1 [Strongylocentrotus purpuratus]
sw00358	20520	23017	0.7761	21282	18133	0.9685	12017	15128	0.8499	7577	22226	0.2946		gi|80475047|gb|AAI09118.1| ARS2 protein [Homo sapiens]
sw00359	4551	3322	1.0986	4199	4088	0.9569	3928	3305	1.2574	804	4802	0.1835		gi|17298115|dbj|BAB78526.1| wing disc-specific protein [Bombyx mori]
sw00360	4586	2822	1.2966	4925	6762	0.5776	2184	7263	0.3032	220	3965	0.0558
sw00361	305	421	0.8896	278	402	0.8964	101	150		87	183
sw00362	338	380		416	456	1.0893	149	290		174	287			gi|51474786|ref|XP_496320.1| PREDICTED: zinc finger protein 534 isoform 1 [Homo sapiens] kruppel-like zinc finger protein isoform 2 [Homo sapiens]
sw00363	281	334		392	429	1.0555	34	205		104	209
sw00364	855	933	0.8708	1048	998	0.977	329	514	0.7374	255	777	0.4495		gi|76646981|ref|XP_583282.2| PREDICTED: similar to High-affinity cAMP-specific and IBMX-insensitive 3,5-cyclic phosphodiesterase 8A [Bos taurus]
sw00365	1002	1137	0.9109	1354	1335	1.0693	1234	955	1.4063	4013	748	5.3138		gi|66559548|ref|XP_625036.1| PREDICTED: similar to novel protein similar to vertebrate phosphoribosylformylglycinamidine synthase (FGAR amidotransferase) (PFAS) [Apis mellifera]
sw00367	322	326		436	495	0.9881	61	223		44	198			gi|73980739|ref|XP_540151.2| PREDICTED: similar to Protein kinase C, nu type (nPKC-nu) (Protein kinase EPK2) [Canis familiaris]
sw00368	804	646	1.2229	528	566	0.9327	505	477	1.1969	710	972	0.8696		gi|66556163|ref|XP_392897.2| PREDICTED: similar to thyroid hormone receptor interactor 12 [Apis mellifera]
sw00372	568	653	0.8279	583	596	0.955	256	501	0.6378	48	304
sw00373	2682	2016	1.203	2788	1845	1.4827	2051	800	2.5694	3191	1213	2.4848
sw00374	725	671	1.2433	522	564	1.0167	313	319		242	426	0.9252
sw00378	688	617	1.2916	784	715	1.1577	183	234		223	249			gi|31541996|ref|NP_084357.2| zinc finger, FYVE domain containing 20 [Mus musculus] Rabenosyn-5 (FYVE finger-containing Rab5 effector protein rabenosyn-5) (Zinc finger FYVE domain-containing protein 20) Zfyve20 protein [Mus musculus]
sw00379	371	432	0.8988	444	436	1.1041	52	242		188	209			gi|89243302|gb|ABD64815.1| Dvir_CG10440 [Drosophila virilis]
sw00380	421	615	0.6525	636	743	0.8265	136	407	0.5091	119	358			gi|7024433|emb|CAB75890.1| male sterility protein 2-like protein [Torpedo marmorata]
sw00381	262	318		292	418	0.8917	28	147		59	154			gi|28316839|gb|AAO39443.1| RH74545p [Drosophila melanogaster]
sw00382	3467	2259	1.5054	3669	2563	1.3271	3062	2512	1.2752	10744	1783	6.1991		gi|87248199|gb|ABD36152.1| perilipin [Bombyx mori]
sw00386	394	575	0.9446	336	495	1.1099	409	391	1.1623	349	379			gi|66812926|ref|XP_640642.1| cytochrome c oxidase assembly protein [Dictyostelium discoideum] cytochrome c oxidase assembly protein [Dictyostelium discoideum] cytochrome c oxidase assembly protein [Dictyostelium discoideum]
sw00387	1027	1395	0.8997	1360	1429	1.2802	1522	1465	1.0436	991	1232	0.95		gi|62825466|gb|AAY16253.1| calmodulin [Gonothyraea loveni]
sw00392	362	506	1.0285	306	396		43	207		84	239
sw00394	22088	21580	0.869	30185	21566	1.3948	29326	16239	1.9367	18100	16288	0.9217		gi|87248463|gb|ABD36284.1| ATP synthase [Bombyx mori]
sw00397	290	324		225	460	0.8718	205	184		101	198			gi|66516917|ref|XP_391828.2| PREDICTED: similar to CG8312-PA, isoform A [Apis mellifera]
sw00399	197	332		248	446	1.0073	164	245		51	185
sw00400	319	488	0.9546	530	776	0.9637	390	693	0.5818	1126	381	3.44
sw00402	292	402	1.0834	116	240		75	191		35	164
sw00403	1873	2474	0.8251	1577	2148	0.8795	1724	2499	0.7257	616	1783	0.4305		gi|68354396|ref|XP_693392.1| PREDICTED: similar to amyloid beta (A4) precursor protein-binding, family B, member 2, partial [Danio rerio]
sw00404	3527	2769	1.3121	3517	4033	0.9308	3509	4895	0.7197	3124	3103	0.9696		gi|21358059|ref|NP_648022.1| CG6610-PA [Drosophila melanogaster] RE60135p [Drosophila melanogaster] CG6610-PA [Drosophila melanogaster]
sw00405	179	303		261	456	0.9477	101	208		64	205			gi|39104484|dbj|BAC65561.3| mKIAA0422 protein [Mus musculus]
sw00408	419	490	1.1772	405	528	1.0483	91	196		121	272			gi|76639394|ref|XP_594042.2| PREDICTED: similar to Myosin-18B (Myosin XVIIIb) [Bos taurus]
sw00411	318	310		400	517	1.1063	253	297		168	211			gi|66499513|ref|XP_392146.2| PREDICTED: similar to CG5978-PA [Apis mellifera]
sw00412	828	1432	0.6472	590	692	1.0821	976	784	1.2387	328	701	0.5968
sw00418	653	1251	0.6474	380	878	0.628	236	458	0.6732	321	554	0.8115		gi|51513399|gb|AAH80449.1| MGC89564 protein [Xenopus tropicalis] MGC89564 protein [Xenopus tropicalis] Probable phosphatase phospho2
sw00419	365	477	0.9577	353	515	0.9817	157	205		194	299
sw00423	1171	1139	1.0808	906	1211	0.8895	1716	781	2.312	1039	1367	0.7556
sw00426	388	547	0.9563	287	418	1.0408	396	341		160	378			gi|115506|sp|P04352|CALM_CHLRE Calmodulin (CaM) calmodulin
sw00427	1673	1700	0.9863	1522	1407	1.206	1967	1268	1.6173	2336	1539	1.4675		gi|311728|emb|CAA29813.1| su(wa) protein [Drosophila melanogaster]
sw00428	737	675	1.2784	667	570	1.4891	692	304	2.5755	272	398			gi|72105901|ref|XP_786614.1| PREDICTED: similar to putative protein, with 2 coiled coil-4 domains, of eukaryotic origin, HoloCentric chromosome binding Protein HCP-6 (195.1 kD) (hcp-6), partial [Strongylocentrotus purpuratus]
sw00431	316	437	0.9375	265	464	0.8698	208	366		296	356			gi|18088892|gb|AAH21102.1| LEREPO4 protein [Homo sapiens] unknown [Homo sapiens]
sw00432	421	476	1.1063	472	424	1.502	159	230		338	305			gi|54289244|gb|AAV31912.1| pyrroline-5-carboxylate reductase [Aedes aegypti]
sw00437	381	511	0.9929	441	702	0.8397	358	527	0.7626	141	358
sw00439	316	456	0.8099	230	328		70	218		33	163
sw00441	353	462	1.0395	330	639	0.7303	239	275		481	422	1.4517		gi|5901822|gb|AAD55419.1| EG:118B3.2 [Drosophila melanogaster]
sw00442	7173	8304	0.7455	7205	5957	1.1637	5338	5621	1.0172	3148	7341	0.3836
sw00448	374	474	0.9431	304	427	0.9213	78	206		138	266
sw00450	303	454	0.8844	280	353		50	206		92	175			gi|66499743|ref|XP_397346.2| PREDICTED: similar to Probable pyruvate dehydrogenase E1 component alpha subunit, mitochondrial precursor (PDHE1-A) [Apis mellifera]
sw00452	435	434	1.1413	435	382	1.2692	235	359		61	301			gi|28317085|gb|AAO39561.1| LP07855p [Drosophila melanogaster]
sw00453	914	975	1.0127	1093	991	1.2339	825	716	1.1667	762	935	0.9631
sw00454	759	792	1.0575	546	592	1.1163	649	647	1.1578	894	523	2.2293		gi|55243652|gb|EAA06471.2| ENSANGP00000019414 [Anopheles gambiae str. PEST] ENSANGP00000019414 [Anopheles gambiae str. PEST]
sw00455	4585	3178	1.1979	4449	4742	0.8719	3295	4754	0.7425	4839	4305	0.982		gi|55665934|emb|CAH72141.1| novel protein (HSPC155) [Homo sapiens] CGI-126 protein [Homo sapiens] Ufm1-conjugating enzyme 1 (Ubiquitin-fold modifier-conjugating enzyme 1)
sw00456	395	395		543	564	1.0327	88	267		83	214			gi|22096185|sp|Q9V5N8|STAN_DROME Protocadherin-like wing polarity protein stan precursor (Protein starry night) (Protein flamingo)
sw00457	1945	1546	1.2228	3517	2744	1.3074	3586	2760	1.312	4052	1893	2.1181		gi|56270469|gb|AAH87416.1| LOC496023 protein [Xenopus laevis]
sw00459	1121	1564	0.6095	858	1157	0.7942	426	840	0.6667	1694	1069	1.7295		gi|55644901|ref|XP_523558.1| PREDICTED: solute carrier family 25 (mitochondrial carrier; oxoglutarate carrier), member 11 [Pan troglodytes] solute carrier family 25 (mitochondrial carrier; oxoglutarate carrier), member 11 [Homo sapiens] Solute carrier family 25 (mitochondrial carrier; oxoglutarate carrier), member 11 [Homo sapiens] Solute carrier family 25 (mitochondrial carrier; oxoglutarate car…
sw00461	496	635	0.9267	506	557	1.1197	377	366		782	654	1.4743		gi|56269982|gb|AAH87412.1| LOC496020 protein [Xenopus laevis]
sw00462	459	475	1.1741	656	596	1.2909	282	272		266	430	0.9436		gi|55245404|gb|EAA04682.2| ENSANGP00000019053 [Anopheles gambiae str. PEST] ENSANGP00000019053 [Anopheles gambiae str. PEST]
sw00464	5406	4263	1.0265	8508	4763	1.4542	7451	4027	1.7368	8727	3672	2.0546		gi|83423461|dbj|BAE54254.1| transitional endoplasmic reticulum ATPase TER94 [Bombyx mori]
sw00466	862	1079	0.8689	629	673	1.0706	102	207		209	441	0.7376		gi|23499459|gb|AAN05413.1| aristaless-related homeobox [Xenopus laevis]
sw00467	564	767	0.7623	259	495	0.719	225	726	0.3579	179	369			gi|76650703|ref|XP_587226.2| PREDICTED: similar to EF-hand domain (C-terminal) containing 1 isoform 1 [Bos taurus]
sw00468	695	753	0.9669	537	476	1.1732	166	339		171	353			gi|62201358|gb|AAH93463.1| MGC97750 protein [Xenopus tropicalis] MGC97750 protein [Xenopus tropicalis] Protein FAM61B homolog
sw00469	30754	19144	1.1391	42061	43779	0.8579	36510	32574	1.2431	57726	7185	5.9592
sw00472	409	417	1.1373	585	500	1.2005	70	184		68	213			gi|55236648|gb|EAA13592.2| ENSANGP00000002757 [Anopheles gambiae str. PEST] ENSANGP00000002757 [Anopheles gambiae str. PEST]
sw00473	305	345		420	451	1.2708	129	290		292	279
sw00474	1865	2721	0.6693	2688	2002	1.3992	890	1155	0.8964	211	2027	0.1146
sw00477	826	969	0.9048	800	1124	0.8085	1248	1227	1.0194	1207	705	1.86		gi|87248265|gb|ABD36185.1| ADP-ribosylation factor-like protein [Bombyx mori]
sw00478	275	414	0.8704	379	389		50	160		112	268			gi|89243264|gb|ABD64784.1| Bent [Drosophila virilis]
sw00479	353	412	0.9967	166	292		168	240		100	239
sw00481	164	230		357	437	1.0581	80	175		65	201			gi|66522650|ref|XP_393936.2| PREDICTED: similar to ENSANGP00000011090 [Apis mellifera]
sw00482	1002	1211	0.8982	1188	1211	1.0769	280	401	0.9257	487	983	0.7078
sw00483	1740	1703	1.0195	1757	1605	1.1479	1022	1259	0.938	1260	2307	0.6365		gi|56405368|sp|P91875|RPA1_DROME DNA-directed RNA polymerase I largest subunit
sw00484	350	494	0.8292	593	644	1.0065	60	232		78	222			gi|66551291|ref|XP_624118.1| PREDICTED: similar to putative MAPK activating protein PM20,PM21 [Apis mellifera]
sw00485	245	323		361	409	1.1496	108	186		44	140			gi|55244398|gb|EAA05617.2| ENSANGP00000012541 [Anopheles gambiae str. PEST] ENSANGP00000012541 [Anopheles gambiae str. PEST]
sw00486	1537	1911	0.8307	1892	2640	0.7061	1027	1060	1.1338	1394	1567	1.086
sw00487	456	641	0.7897	539	643	0.9638	153	330		193	337			gi|76620742|ref|XP_871502.1| PREDICTED: similar to Pyroglutamyl-peptidase I (Pyrrolidone-carboxylate peptidase) (5-oxoprolyl-peptidase) (PGP-I) isoform 1 [Bos taurus]
sw00488	6451	4532	1.1941	8812	8506	0.877	5161	6201	0.845	4537	4458	0.9248		gi|1490232|emb|CAA67981.1| mitochondrial ATP synthase [Drosophila melanogaster]
sw00489	267	363		460	508	1.1147	62	163		164	224			gi|76682030|ref|XP_871356.1| PREDICTED: similar to WD repeat domain 40B-like [Bos taurus]
sw00490	244	374		484	512	1.1723	48	215		48	212			gi|58585110|ref|NP_001011585.1| type I inositol 1,4,5-trisphosphate 5-phosphatase [Apis mellifera] IP3phosphatase [Apis mellifera]
sw00491	433	533	0.9359	459	537	1.031	117	267		79	249			gi|10442640|gb|AAG17400.1| alpha/epsilon-sarcoglycan-like protein SCG-ALPHA/EPSILON [Drosophila melanogaster]
sw00492	239	352		350	476	0.8723	73	215		60	221			gi|74038623|dbj|BAE43845.1| Ebony [Papilio xuthus]
sw00493	2346	2944	0.8121	3352	3453	0.9753	3024	2649	1.1351	2086	2340	0.9367		gi|51261378|gb|AAH79934.1| Bub3-prov protein [Xenopus tropicalis] bub3-prov protein [Xenopus tropicalis]
sw00494	575	682	0.9782	988	1011	1.0989	281	384		212	337			gi|77403903|gb|ABA81830.1| LP17264p [Drosophila melanogaster]
sw00495	1159	1360	0.8616	1310	1541	0.8757	865	1318	0.7518	763	1489	0.6393		gi|2772955|gb|AAC38822.1| juvenile hormone esterase precursor [Heliothis virescens]
sw00496	393	401	1.1505	409	374	1.3083	209	245		184	402	0.8439
sw00498	287	398		340	512	0.8575	53	195		56	227			gi|1805259|gb|AAB41492.1| cyclic nucleotide-gated channel [Caenorhabditis elegans]
sw00500	289	407	0.8443	396	460	0.9485	60	260		104	248
sw00502	913	639	1.7101	934	1069	1.0065	439	858	0.6595	1143	465	3.2921		gi|56378317|dbj|BAD74195.1| heat shock protein hsp 19.9 [Bombyx mori]
sw00503	387	485	0.9487	467	488	1.1494	58	214		37	217
sw00504	326	406	0.9453	539	489	1.183	39	208		121	243			gi|19518|emb|CAA42689.1| glutamine synthetase [Lactuca sativa] Glutamine synthetase (Glutamate--ammonia ligase) (GS(1))
sw00505	235	381		423	508	1.0873	158	299		82	229
sw00506	1044	1123	1.043	1220	1285	1.0822	331	562	0.7771	273	1002	0.3875
sw00507	425	492	1.0117	576	614	1.0834	156	334		147	343			gi|11863542|emb|CAC18800.1| AKAP550 [Drosophila melanogaster]
sw00508	403	451	1.0165	974	915	1.0702	266	422	0.9237	665	547	1.847
sw00509	633	949	0.8135	1123	1161	1.1165	880	816	1.1813	809	765	1.4686		gi|76576153|gb|ABA53824.1| sterol carrier protein x [Bombyx mori]
sw00510	205	344		559	692	0.9773	57	155		49	220			gi|76789661|sp|Q9UL68|MYT1L_HUMAN Myelin transcription factor 1-like protein (MyT1L protein) (MyT1-L)
sw00511	4365	3399	1.0819	4587	5194	0.8529	3187	4265	0.8818	6254	2662	1.9395		gi|85857748|gb|ABC86409.1| IP09454p [Drosophila melanogaster]
sw00512	686	557	1.3343	1136	862	1.3372	415	439	1.1782	398	431	1.568		gi|1722855|sp|P50532|SMC4_XENLA Structural maintenance of chromosome 4 (Chromosome-associated protein C) (Chromosome assembly protein XCAP-C) XCAP-C
sw00513	323	465	0.9353	346	309		384	284		61	350			gi|55245036|gb|EAA45371.2| ENSANGP00000025288 [Anopheles gambiae str. PEST] ENSANGP00000025288 [Anopheles gambiae str. PEST]
sw00514	252	384		245	493	0.6823	54	177		40	181			gi|457769|emb|CAA83002.1| Collagen [Bombyx mori]
sw00516	794	943	0.8552	1143	1117	1.0075	573	877	0.7867	330	496	1.0314		gi|50748764|ref|XP_421395.1| PREDICTED: similar to expressed sequence AI839735 [Gallus gallus]
sw00520	293	427	0.7977	409	515	0.8774	156	336		166	388
sw00522	339	485	0.9489	424	576	0.9497	157	222		117	280
sw00524	2066	2229	0.848	2352	1926	1.144	1136	1263	1.0061	982	1766	0.6542		gi|55240715|gb|EAA09158.2| ENSANGP00000003574 [Anopheles gambiae str. PEST] ENSANGP00000003574 [Anopheles gambiae str. PEST]
sw00526	164	355		322	507	0.8485	60	160		63	183			gi|76155184|gb|AAX26437.2| SJCHGC02489 protein [Schistosoma japonicum]
sw00527	294	377		346	434	0.9583	56	242		62	222
sw00529	3800	3176	1.0784	5752	4603	1.1295	1234	3305	0.4478	229	4284	0.0821		gi|28396158|gb|AAO39756.1| putative antennal carrier protein TOL-2 [Anopheles gambiae]
sw00530	1007	1297	0.8724	2018	2140	0.9516	1075	1538	0.7628	1600	994	1.7552		gi|40949813|gb|AAR97568.1| Cu/Zn SOD [Bombyx mori] Superoxide dismutase [Cu-Zn]
sw00531	792	852	0.8824	730	818	0.9575	214	276		227	332
sw00532	261	437	0.6981	368	429	0.9644	31	206		79	250			gi|464960|sp|P35047|TRYC_MANSE Trypsin, alkaline C precursor
sw00533	630	653	1.1324	577	711	0.9204	438	499	0.9877	606	705	1.1106		gi|34878620|ref|XP_226076.2| PREDICTED: similar to putative WDC146 [Rattus norvegicus]
sw00535	599	611	0.9938	588	573	1.1438	250	280		177	294			gi|50748370|ref|XP_421216.1| PREDICTED: similar to likely ortholog of mouse aquarius [Gallus gallus]
sw00536	2251	1519	1.355	2190	1846	1.0891	1625	971	1.769	1204	1965	0.7405		gi|72013127|ref|XP_782934.1| PREDICTED: similar to aquarius [Strongylocentrotus purpuratus]
sw00539	1765	1221	1.3336	2368	1474	1.5435	1634	1446	1.2782	2616	396	7.6591		gi|24475545|dbj|BAC22695.1| xylosylprotein beta4-galactosyltransferase [Drosophila melanogaster]
sw00540	242	301		333	402	0.9565	74	235		112	242			gi|19577385|emb|CAD27767.1| hypothetical protein [Anopheles gambiae] ENSANGP00000025129 [Anopheles gambiae str. PEST] ENSANGP00000025129 [Anopheles gambiae str. PEST]
sw00542	190	278		366	418	1.116	49	177		93	209			gi|7657214|ref|NP_055401.1| hormonally upregulated Neu-associated kinase [Homo sapiens] putative serine/threonine protein kinase MAK-V [Homo sapiens] Hormonally up-regulated neu tumor-associated kinase (Serine/threonine-protein kinase MAK-V) (B19)
sw00543	1019	953	1.0068	1339	1163	1.1595	1378	1070	1.4703	2627	548	5.4507		gi|85857650|gb|ABC86360.1| IP12451p [Drosophila melanogaster]
sw00544	354	473	0.838	466	488	1.0277	226	329		280	435	1.0041		gi|55245621|gb|EAA04310.2| ENSANGP00000016573 [Anopheles gambiae str. PEST] ENSANGP00000016573 [Anopheles gambiae str. PEST]
sw00545	2684	2068	1.2328	2024	3637	0.5261	1721	2997	0.6259	1126	2213	0.6111		gi|34391468|gb|AAN34361.1| putative RNA methylase [Gallus gallus] putative RNA methylase [Gallus gallus]
sw00547	1524	1688	0.8212	970	1453	0.675	867	1808	0.5381	862	1569	0.6515		gi|66504524|ref|XP_623875.1| PREDICTED: similar to GA11196-PA [Apis mellifera]
sw00548	248	329		363	400	0.9796	53	168		92	216
sw00551	428	484	0.9432	339	266		253	287		193	316			gi|77403867|gb|ABA81812.1| RE66325p [Drosophila melanogaster]
sw00553	4120	3571	1.0691	4697	4005	1.114	4596	3372	1.3934	571	2923	0.2575
sw00556	472	470	1.0575	864	616	1.4066	1208	506	2.6038	163	434	0.6243		gi|25012568|gb|AAN71384.1| RE37929p [Drosophila melanogaster]
sw00559	527	545	0.9935	557	609	0.9958	160	319		165	509	0.5411		gi|68429822|ref|XP_701315.1| PREDICTED: similar to RAS-like, estrogen-regulated, growth inhibitor [Danio rerio]
sw00560	371	437	0.9209	884	622	1.4222	57	177		164	224
sw00562	203	297		449	530	0.9515	85	157		90	222			gi|73945920|ref|XP_864270.1| PREDICTED: similar to Band 4.1-like protein 2 (Generally expressed protein 4.1) (4.1G) isoform 10 [Canis familiaris]
sw00564	527	469	1.1289	582	524	1.086	86	230		164	243			gi|476949|pir||A47371 transcription initiation factor IID 230K chain - fruit fly (Drosophila melanogaster)
sw00566	308	338		490	530	1.0258	60	203		70	170
sw00567	443	519	0.8657	308	403	0.8511	326	386		287	307			gi|68370835|ref|XP_690107.1| PREDICTED: similar to serine protease [Danio rerio]
sw00568	743	716	0.983	929	704	1.2046	340	410	1.0324	431	592	1.0608		gi|66560555|ref|XP_623596.1| PREDICTED: similar to Ser/Thr kinase STK, partial [Apis mellifera]
sw00569	925	888	1.0434	925	1030	0.9695	890	1056	0.9756	720	805	1.1146
sw00570	228	307		368	453	0.9537	38	169		39	179			gi|68395017|ref|XP_685648.1| PREDICTED: similar to otoferlin [Danio rerio]
sw00571	2664	1826	1.2412	3076	2282	1.3101	1528	1848	0.9257	252	2459	0.1081		gi|6456874|gb|AAF09264.1| cytochrome P450 [Orconectes limosus]
sw00572	356	451	0.7996	754	568	1.2432	62	264		174	313			gi|4959166|gb|AAD34263.1| calmodulin mutant SYNCAM58A [synthetic construct]
sw00574	262	327		412	528	0.89	94	249		145	171
sw00576	829	802	0.9655	1001	921	0.9933	273	437	0.7974	285	517	0.8543		gi|2677845|gb|AAC47810.1| ribonuclease H1 [Drosophila melanogaster]
sw00579	14218	8588	1.3404	20211	18629	1.0663	14103	5998	2.0589	35422	7802	2.3484		gi|55238054|gb|EAL39767.1| ENSANGP00000025956 [Anopheles gambiae str. PEST] ENSANGP00000025956 [Anopheles gambiae str. PEST]
sw00580	215	330		229	423	0.9269	73	189		86	212
sw00581	1318	1479	1.0056	1310	2069	0.8129	1661	1809	0.9109	1180	1417	1.013		gi|50603837|gb|AAH78404.1| Cytokine induced apoptosis inhibitor 1 [Danio rerio] cytokine induced apoptosis inhibitor 1 [Danio rerio]
sw00586	973	1421	0.8195	623	750	1.1954	847	746	1.1437	577	1260	0.5665
sw00587	1114	1027	1.3115	1299	1588	1.0986	1392	1273	1.0993	695	1236	0.7188		gi|73996407|ref|XP_543667.2| PREDICTED: similar to TGF-beta induced apotosis protein 12 isoform 1 [Canis familiaris] PREDICTED: similar to TGF-beta induced apotosis protein 12 isoform 3 [Canis familiaris]
sw00589	220	302		230	482	0.8427	227	257		196	302
sw00590	230	407	0.8668	200	373		122	223		27	170			gi|1536790|dbj|BAA07705.1| Dsrc41 [Drosophila melanogaster]
sw00591	2500	2547	1.0515	4269	4611	1.0872	2717	4507	0.6188	11125	2078	3.6761		gi|55239333|gb|EAA44260.2| ENSANGP00000025275 [Anopheles gambiae str. PEST] ENSANGP00000025275 [Anopheles gambiae str. PEST]
sw00592	641	931	0.8573	784	801	1.3446	849	712	1.2093	831	667	1.4644		gi|72012376|ref|XP_781471.1| PREDICTED: similar to phosphatidic acid phosphatase type 2B, partial [Strongylocentrotus purpuratus]
sw00593	19914	15769	1.067	29310	31675	0.9836	22096	28608	0.9125	1020	30328	0.033		gi|2443450|gb|AAC47827.1| olfactory protein [Cactoblastis cactorum]
sw00594	345	539	0.8797	383	554	1.0198	158	272		150	389			gi|48427981|sp|P82121|CUO8_BLACR Cuticle protein 8 (BcNCP21.1)
sw00595	11459	14327	0.7173	8796	8163	1.1308	2664	3795	0.7274	966	21957	0.0557		gi|2961127|gb|AAC05666.1| putative pupal-specific cuticular protein CP2b [Anopheles gambiae]
sw00598	458	506	1.2285	472	520	1.3079	238	303		341	273			gi|28316974|gb|AAO39508.1| RE36634p [Drosophila melanogaster]
sw00600	381	541	0.9568	354	500	0.9891	178	280		169	269
sw00604	318	424	1.0745	252	377		45	201		70	196			gi|1155060|emb|CAA64446.1| Antennal binding protein X [Bombyx mori]
sw00605	527	627	1.1184	534	639	1.1757	784	552	1.4673	1233	373	4.1437		gi|55245480|gb|EAA04612.2| ENSANGP00000019087 [Anopheles gambiae str. PEST] ENSANGP00000019087 [Anopheles gambiae str. PEST]
sw00608	210	401	0.7815	251	476	0.7636	111	279		178	287			gi|68384447|ref|XP_691261.1| PREDICTED: similar to Neural proliferation differentiation and control protein-1 precursor (NPDC-1 protein) [Danio rerio]
sw00609	2036	2447	0.8613	2557	3264	0.908	2745	3075	0.8414	2064	2900	0.6382		gi|66523378|ref|XP_394044.2| PREDICTED: similar to Cullin homolog 1 (CUL-1) [Apis mellifera]
sw00611	2355	1903	1.192	3216	3208	1.0677	2641	2940	0.9425	9130	1918	4.3876		gi|66549073|ref|XP_624173.1| PREDICTED: similar to 6-phosphogluconolactonase [Apis mellifera]
sw00614	299	413	1.0262	151	324		36	205		36	164			gi|66571254|gb|AAY51592.1| IP01125p [Drosophila melanogaster] GTX/Nkx6B-like homeodomain protein [Drosophila melanogaster] RE53769p [Drosophila melanogaster] HGTX CG13475-PA [Drosophila melanogaster] CG13475-PA [Drosophila melanogaster]
sw00615	423	515	1.001	445	579	1.0469	576	597	1.1735	441	515	1.0582		gi|28317155|gb|AAD46857.2| LD09009p [Drosophila melanogaster]
sw00616	410	522	0.9564	287	432	0.8984	261	321		258	264			gi|41016826|sp|Q27772|C1TC_SPOFR C-1-tetrahydrofolate synthase, cytoplasmic (C1-THF synthase) [Includes: Methylenetetrahydrofolate dehydrogenase ; Methenyltetrahydrofolate cyclohydrolase ; Formyltetrahydrofolate synthetase ] methylenetetrahydrofolate dehydrogenase methylenetetrahydrofolate dehydrogenase-cyclohydrolase-synthetase
sw00618	276	448	0.8902	139	345		38	204		57	193			gi|4761286|gb|AAD29305.1| innexin-1 [Schistocerca americana] Innexin inx1 (Innexin-1) (G-Inx1)
sw00620	457	529	1.0529	492	640	0.946	206	361		580	327	2.8267		gi|50753015|ref|XP_413833.1| PREDICTED: similar to Histidine decarboxylase (HDC) [Gallus gallus]
sw00622	274	423	0.9352	128	299		33	169		33	203			gi|85861136|gb|ABC86516.1| AT29264p [Drosophila melanogaster]
sw00623	305	500	0.7839	256	436	0.9063	105	267		36	172
sw00625	217	388		170	402	0.739	203	300		115	203
sw00627	360	448	0.9327	300	409	1.0169	123	310		87	203			gi|4753706|emb|CAB42050.1| monocarboxylate transporter 1 homologue [Drosophila melanogaster]
sw00628	532	582	1.0195	46	245		-30	199		2443	174	20.2043
sw00630	5512	3963	1.2861	6291	2100	3.2415	3324	973	4.7951	241	3206	0.0824
sw00631	357	589	0.681	273	385		181	409	0.6818	180	170
sw00632	788	820	1.0102	139	572	0.38	539	458	1.1677	359	563	0.7996
sw00635	790	811	0.9949	578	719	0.9599	303	431	0.941	200	339
sw00636	637	968	0.6896	744	609	1.2814	761	627	1.149	265	678	0.4782
sw00639	478	526	1.0121	273	456	0.8385	183	395		140	192			gi|66525469|ref|XP_394096.2| PREDICTED: similar to ENSANGP00000022233 [Apis mellifera]
sw00641	560	472	1.3843	469	428	1.375	440	372	1.2974	72	446	0.2828		gi|55237345|gb|EAA12252.2| ENSANGP00000019620 [Anopheles gambiae str. PEST] ENSANGP00000019620 [Anopheles gambiae str. PEST]
sw00643	3014	2151	1.2208	3124	2104	1.476	3788	1439	2.3945	13691	2189	5.9698		gi|8918492|dbj|BAA97657.1| ecdysteroid-inducible angiotensin-converting enzyme-related gene product [Bombyx mori]
sw00644	1393	1086	1.2008	1073	1124	0.9262	1054	847	1.2681	575	805	0.9152
sw00646	365	527	0.8832	510	568	1.1	362	398		280	446	0.945		gi|68432349|ref|XP_692866.1| PREDICTED: similar to Transcription factor ADF-1 (ADH distal factor 1) [Danio rerio]
sw00648	704	659	1.0948	687	622	1.1336	452	548	0.9429	1021	559	2.5068		gi|73988919|ref|XP_542530.2| PREDICTED: similar to neuron navigator 2 isoform 2 [Canis familiaris]
sw00652	2040	1624	1.1283	3662	2858	1.1094	2827	2208	1.194	2912	1467	2.1431		gi|1209648|gb|AAC47002.1| protein tyrosine phosphatase DLAR protein tyrosine phosphatase (DLAR) precursor
sw00653	8141	5614	1.1979	10095	8989	1.0635	8093	3577	2.279	7506	5544	1.1843		gi|1209648|gb|AAC47002.1| protein tyrosine phosphatase DLAR protein tyrosine phosphatase (DLAR) precursor
sw00656	2672	2298	1.0162	3433	2575	1.1546	2286	2619	0.8246	567	1963	0.3036
sw00658	344	488	0.8887	349	441	1.0021	348	249		68	347
sw00662	307	410	0.9739	301	378		65	198		131	288
sw00663	1180	1510	0.7272	1188	1210	1.007	714	970	0.8032	389	944	0.5425		gi|11177164|gb|AAG32160.1| polydom protein [Mus musculus] sushi, von Willebrand factor type A, EGF and pentraxin domain containing 1 [Mus musculus]
sw00665	372	485	0.9203	546	1212	0.5082	240	325		238	476	0.6979
sw00666	752	1037	0.798	983	961	1.122	858	923	1.1104	948	995	1.2072		gi|72014604|ref|XP_787398.1| PREDICTED: similar to Aladin (Adracalin) [Strongylocentrotus purpuratus]
sw00667	576	624	0.9917	451	640	0.8512	201	325		358	389
sw00669	305	422	0.9001	493	590	1.0745	308	364		373	320			gi|7707679|dbj|BAA95353.1| trehalose receptor 1 [Drosophila melanogaster]
sw00670	1386	2057	0.6777	1533	1511	1.0853	1242	984	1.5635	1262	2188	0.6443		gi|83595231|gb|ABC25067.1| fibrillarin protein [Glossina morsitans morsitans]
sw00671	4676	3528	1.1115	3987	3961	0.9235	2245	2481	0.9869	4094	6174	0.6358		gi|66549810|ref|XP_392867.2| PREDICTED: similar to Rab geranylgeranyltransferase, beta subunit [Apis mellifera]
sw00673	278	381		477	529	1.1036	80	156		76	164
sw00674	700	829	0.9577	1032	1102	1.0378	287	484	0.768	668	916	1.0041		gi|66517087|ref|XP_393674.2| PREDICTED: similar to Ring canal kelch homolog (Kelch-like protein 1) [Apis mellifera]
sw00675	403	507	0.9251	484	442	1.3834	58	236		63	170			gi|76162607|gb|AAX30548.2| SJCHGC04835 protein [Schistosoma japonicum]
sw00676	401	478	0.9646	521	607	0.9557	111	235		133	305			gi|3901268|gb|AAC78627.1| SV2 related protein [Rattus norvegicus]
sw00677	366	464	1.0579	586	627	1.1158	71	168		173	260
sw00680	326	462	0.8387	482	495	1.1131	75	181		98	196			gi|73964993|ref|XP_540449.2| PREDICTED: similar to likely ortholog of mouse ubiquitin-conjugating enzyme E2-230K [Canis familiaris]
sw00681	1339	1846	0.7847	2147	2121	1.0611	1392	1545	0.9381	8161	1511	6.299		gi|37182587|gb|AAQ89095.1| CGLQ1891 [Homo sapiens] synleurin [Homo sapiens] synleurin - human
sw00685	131	254		210	436	0.6898	155	304		124	203			gi|4877404|dbj|BAA77764.1| c-met/hepatocyte growth factor receptor [Xenopus laevis]
sw00686	1468	1863	0.8165	2622	2459	1.0936	1715	2208	0.8758	1472	1766	1.0039		gi|73953862|ref|XP_536503.2| PREDICTED: similar to DnaJ homology subfamily A member 5 isoform 2 isoform 1 [Canis familiaris]
sw00687	433	502	1.0068	576	592	1.1395	61	187		144	226
sw00688	281	323		353	406	1.0466	101	156		124	297			gi|109680|pir||A41182 collagen alpha 1(II) chain precursor - mouse
sw00689	1091	2079	0.6115	2069	3516	0.5942	2363	2766	0.9154	12203	1562	9.3569		gi|85070116|gb|ABC69733.1| vermilion [Mayetiola destructor]
sw00690	526	544	1.1891	596	788	0.9004	267	304		332	407	1.2901		gi|28317277|gb|AAO39638.1| AT18914p [Drosophila melanogaster]
sw00691	305	466	0.804	530	533	1.1735	204	332		103	295			gi|52345726|ref|NP_001004909.1| ubiquitin-conjugating enzyme E2H (UBC8 homolog, yeast) [Xenopus tropicalis] Ubiquitin-conjugating enzyme E2H (UBC8 homolog, yeast) [Xenopus tropicalis] Ube2h-prov protein [Xenopus laevis] ubiquitin-conjugating enzyme E2H (UBC8 homolog, yeast) [Xenopus tropicalis]
sw00696	359	441	0.9374	375	444	0.9434	224	252		167	336
sw00697	478	776	0.7746	333	671	0.595	467	676	0.7788	479	721	0.9513		gi|89243295|gb|ABD64810.1| Dvir_CG11093 [Drosophila virilis]
sw00698	206	305		426	578	0.9213	79	211		56	213			gi|80475867|gb|AAI09231.1| LIM homeobox protein 5 [Homo sapiens] LHX5 protein [Homo sapiens] LIM/homeobox protein Lhx5 LIM homeobox protein 5 [Homo sapiens]
sw00700	507	600	0.9218	585	651	0.933	198	392		196	293
sw00701	324	486	0.91	418	579	0.9095	256	392		231	370			gi|15079833|gb|AAH11719.1| Transmembrane protein 43 [Homo sapiens]
sw00702	169	277		319	491	0.8496	53	179		47	194			gi|68371832|ref|XP_698495.1| PREDICTED: similar to branched chain ketoacid dehydrogenase E1, beta polypeptide [Danio rerio]
sw00704	461	451	1.1526	664	614	1.1312	290	314		255	418	1.0927		gi|38649368|gb|AAH63342.1| Glucose-fructose oxidoreductase domain containing 1 [Xenopus tropicalis] glucose-fructose oxidoreductase domain containing 1 [Xenopus tropicalis]
sw00705	921	1418	0.7192	1198	1203	1.0814	669	806	0.959	305	788	0.6232
sw00707	265	343		341	498	0.8013	59	212		79	204
sw00708	438	496	0.9704	563	595	1.0188	278	363		248	442	0.8997		gi|76652847|ref|XP_592719.2| PREDICTED: similar to ubiquitin specific protease 7 (herpes virus-associated) [Bos taurus]
sw00709	385	437	1.1623	314	418	1.0281	72	253		69	178
sw00710	228	359		466	561	1.0692	159	257		133	206			gi|50748610|ref|XP_421324.1| PREDICTED: similar to thyroid hormone receptor interactor 11; thyroid receptor interacting protein 11 [Gallus gallus]
sw00711	370	468	0.9224	572	599	1.0785	81	240		92	205
sw00712	17292	15400	0.8334	25126	17949	1.1505	17814	19888	0.9984	15734	15496	0.9551		gi|87248075|gb|ABD36090.1| ADP-ribosylation factor [Bombyx mori]
sw00713	1044	1177	0.9724	1611	1532	1.1247	1039	1138	1.0516	1577	979	1.6746		gi|74003415|ref|XP_535824.2| PREDICTED: similar to proteasome 26S non-ATPase subunit 2 [Canis familiaris]
sw00714	286	413	0.9649	344	502	0.9137	99	222		131	346			gi|563144|gb|AAA70057.1| tolloid related-1
sw00715	299	403	0.9075	512	497	1.1963	54	246		36	186			gi|66530079|ref|XP_623740.1| PREDICTED: similar to Forkhead box K1 [Apis mellifera]
sw00716	9273	6100	1.1992	13227	10132	1.1036	9474	7586	1.3448	11415	6502	1.9904		gi|7661914|ref|NP_055629.1| proteasome (prosome, macropain) 26S subunit, non-ATPase, 6 [Homo sapiens] breast cancer associated protein SGA-113M [Homo sapiens] phosphonoformate immuno-associated protein 4 [Homo sapiens] KIAA0107 [Homo sapiens] Proteasome (prosome, macropain) 26S subunit, non-ATPase, 6 [Homo sapiens] Proteasome (prosome, macropain) 26S subunit, non-ATPase, 6 [Homo sapiens] Proteaso…
sw00718	236	353		383	535	0.9379	99	204		81	195
sw00719	375	476	0.9162	549	570	1.0945	84	240		125	194
sw00722	311	407	0.9982	376	503	0.9159	44	248		58	192
sw00723	422	460	0.9922	388	440	1.0586	74	199		74	201			gi|66505588|ref|XP_396733.2| PREDICTED: similar to polycomblike 2 [Apis mellifera]
sw00724	5327	4088	1.0597	5535	4380	1.0841	3425	3116	1.1769	3654	4640	0.8454		gi|25013040|gb|AAN71609.1| RH56418p [Drosophila melanogaster]
sw00727	1073	722	1.4691	611	803	0.8313	555	280	2.6507	217	350			No hits found
sw00728	4861	5650	0.6737	4634	4102	0.97	3029	3347	0.974	203	4840	0.0371		gi|27261765|gb|AAN86085.1| lysozyme [Penaeus semisulcatus]
sw00729	483	663	0.8937	648	660	1.0814	11203	619	11.9274	182	256
sw00730	178	280		291	420	0.8972	45	168		37	197			gi|55240264|gb|EAL40406.1| ENSANGP00000029167 [Anopheles gambiae str. PEST] ENSANGP00000029167 [Anopheles gambiae str. PEST]
sw00733	3956	3875	0.9213	7372	6631	1.0033	3453	3332	1.0716	2337	5341	0.4727		gi|66516922|ref|XP_393670.2| PREDICTED: similar to putative carboxylesterase [Apis mellifera]
sw00734	489	839	0.7029	502	705	0.8106	680	704	1.0416	3038	855	3.613		gi|87248427|gb|ABD36266.1| triacylglycerol lipase [Bombyx mori]
sw00736	503	467	1.1776	834	653	1.316	149	232		315	375			gi|57912467|ref|XP_554076.1| ENSANGP00000027599 [Anopheles gambiae str. PEST] ENSANGP00000027599 [Anopheles gambiae str. PEST]
sw00737	483	539	1.0263	209	287		57	188		50	217			gi|72125951|ref|XP_792391.1| PREDICTED: similar to nucleoporin 98kD isoform 1 [Strongylocentrotus purpuratus]
sw00738	1701	1943	0.9169	1812	2998	0.5945	947	3252	0.3385	78	1688	0.0588		gi|47605408|sp|Q7M4E8|CUD6_SCHGR Endocuticle structural protein SgAbd-6
sw00739	295	407	0.8298	405	394	1.1969	44	201		55	158			gi|18150838|dbj|BAA81719.3| protein tyrosine kinase [Ephydatia fluviatilis]
sw00741	623	646	1.0571	352	411	1.0864	146	340		118	264
sw00742	287	473	0.7731	394	567	0.803	287	287		269	344
sw00744	269	321		515	484	1.0979	20	178		137	256			gi|66505993|ref|XP_396307.2| PREDICTED: similar to GA16078-PA, partial [Apis mellifera]
sw00745	2735	2763	0.9496	4286	2455	1.7478	774	1163	0.7626	142	2427	0.0939		gi|77684272|ref|ZP_00799706.1| Histidine kinase, HAMP region:Cache:Bacterial chemotaxis sensory transducer [Alkaliphilus metalliredigenes QYMF] Histidine kinase, HAMP region:Cache:Bacterial chemotaxis sensory transducer [Alkaliphilus metalliredigenes QYMF]
sw00748	2297	1328	1.4931	2667	1700	1.4249	1906	1219	1.6117	8979	2571	2.9391		gi|66508985|ref|XP_624902.1| PREDICTED: similar to ENSANGP00000010432 [Apis mellifera]
sw00753	2316	2600	0.8129	2231	3121	0.7267	844	1626	0.6243	309	3604	0.139		gi|54645262|gb|EAL34002.1| GA16377-PA [Drosophila pseudoobscura]
sw00755	1396	1619	0.7731	881	605	1.5358	338	575	0.7221	127	697	0.2444
sw00756	381	435	0.8927	291	368		79	198		94	201
sw00758	181	247		307	402	0.9355	26	189		56	183			gi|68401941|ref|XP_688119.1| PREDICTED: similar to intracellular membrane-associated calcium-independent phospholipase A2 gamma [Danio rerio]
sw00761	354	401	0.9999	284	423	0.8593	203	434	0.6822	260	270
sw00762	458	543	1.0313	572	552	1.1249	497	590	0.9535	185	391			gi|50800640|ref|XP_424137.1| PREDICTED: similar to cAMP responsive element binding protein-like 2, partial [Gallus gallus]
sw00764	390	364		570	458	1.2242	84	231		161	276			gi|68357620|ref|XP_690024.1| PREDICTED: similar to SMAD specific E3 ubiquitin protein ligase 2 isoform 1 [Danio rerio]
sw00765	254	406	0.7332	310	445	0.8764	96	229		63	184
sw00766	191	320		317	419	0.9175	109	178		153	189			gi|72013576|ref|XP_783056.1| PREDICTED: similar to sepiapterin reductase (7,8-dihydrobiopterin:NADP+ oxidoreductase) [Strongylocentrotus purpuratus]
sw00768	395	424	0.956	636	447	1.3704	85	229		264	321
sw00774	765	880	1.0766	674	599	1.6332	1040	666	1.5748	810	742	1.2821		gi|66509325|ref|XP_392382.2| PREDICTED: similar to Hypoxia-inducible factor 1 alpha (HIF-1 alpha) (HIF1 alpha) (ARNT interacting protein) [Apis mellifera]
sw00777	570	728	0.9881	346	629	0.8848	348	433	0.9874	204	334			gi|68441587|ref|XP_696062.1| PREDICTED: similar to zinc finger protein 585A, partial [Danio rerio]
sw00778	525	810	0.8386	983	1339	0.9894	389	454	0.9417	971	508	2.1889		gi|50760311|ref|XP_417966.1| PREDICTED: similar to prostein protein [Gallus gallus]
sw00779	233	345		236	427	1.0204	206	175		250	296
sw00781	738	825	1.0775	607	673	1.2682	806	636	1.4383	211	492	0.7109		gi|66530938|ref|XP_395558.2| PREDICTED: similar to nonmuscle myosin-II heavy chain [Apis mellifera]
sw00785	619	704	1.1366	600	744	1.1023	362	551	0.7004	306	445	1.0714		gi|83317874|ref|XP_731351.1| erythrocyte membrane-associated giant protein antigen 332 [Plasmodium yoelii yoelii str. 17XNL] erythrocyte membrane-associated giant protein antigen 332 [Plasmodium yoelii yoelii]
sw00788	159	281		242	402	0.9152	70	323		62	243			gi|55620712|ref|XP_516609.1| PREDICTED: similar to ADP-ribosylation factor-like 6 [Pan troglodytes]
sw00789	746	758	1.2461	427	656	0.9501	376	337		372	585	0.9176		gi|82899385|ref|XP_903619.1| PREDICTED: GCN1 general control of amino-acid synthesis 1-like 1 isoform 4 [Mus musculus]
sw00791	349	671	0.7134	451	770	0.7996	1191	1411	0.9134	844	452	2.1848		gi|68401616|ref|XP_685003.1| PREDICTED: similar to 5-nucleotidase, cytosolic II isoform 1 [Danio rerio]
sw00792	320	432	1.0545	349	557	0.8535	307	518	0.6974	198	459	0.6319		gi|78214220|gb|ABB36432.1| RE59252p [Drosophila melanogaster]
sw00794	1255	1180	1.218	1102	1495	0.8796	1488	1972	0.8566	971	1061	1.1669		gi|54638613|gb|EAL28015.1| GA18892-PA [Drosophila pseudoobscura]
sw00795	7045	18116	0.3566	6690	12855	0.5476	8130	6868	1.2134	7146	8773	0.793		gi|9714|emb|CAA45706.1| H(+)-transporting ATPase [Manduca sexta] Vacuolar ATP synthase subunit B (V-ATPase B subunit) (Vacuolar proton pump B subunit)
sw00796	2992	2750	1.1216	2445	2735	0.9765	2960	4127	0.7157	213	2700	0.0931
sw00797	154	410	0.5973	112	319		117	331		32	407	0.2349
sw00799	155	356		305	415	1.1379	164	347		86	247
sw00800	12929	9326	1.2263	15386	16218	0.9428	13792	15329	0.9365	12342	10280	0.9968		gi|942598|gb|AAA74396.1| cytochrome c oxidase subunit IV
sw00810	1496	1909	0.8608	1545	1221	1.3919	1092	1292	0.9387	442	1281	0.4336		gi|23393882|gb|AAN31397.1| cell adhesion molecule RST [Drosophila virilis] cell adhesion molecule RST [Drosophila virilis]
sw00812	388	589	0.7732	451	639	0.8677	97	281		72	1215	0.0552		gi|55245299|gb|EAA04515.2| ENSANGP00000010837 [Anopheles gambiae str. PEST] ENSANGP00000010837 [Anopheles gambiae str. PEST]
sw00813	6437	4925	1.2509	8181	7558	1.1753	9931	8786	1.1158	13594	3984	2.1965		gi|7548744|gb|AAB28237.2| diazepam binding inhibitor; DBI [Manduca sexta] Acyl-CoA-binding protein homolog (ACBP) (Diazepam-binding inhibitor homolog) (DBI) diazepam binding inhibitor-like peptide
sw00814	180	284		151	335		101	281		32	627	0.1257		gi|23503514|dbj|BAC20347.1| Cu,Zn-superoxide dismutase [Hylobates lar] Superoxide dismutase [Cu-Zn]
sw00815	10443	10474	0.7885	10934	9531	1.1473	9244	7440	1.2546	6530	7561	0.6829
sw00816	728	1003	0.7667	1201	1078	1.2933	843	789	1.0806	523	840	0.7715
sw00818	551	788	0.8498	309	503	0.7881	178	280		97	254
sw00820	2169	2626	0.7779	2381	2170	1.0415	2378	1937	1.1239	1678	1227	1.3735		gi|72180773|ref|XP_798850.1| PREDICTED: similar to Staphylococcal nuclease domain containing protein 1 (p100 co-activator) (100 kDa coactivator) (4SNc-Tudor domain protein) [Strongylocentrotus purpuratus]
sw00821	341	543	0.8381	274	485	0.8578	188	273		175	289
sw00824	407	426	1.1487	370	384		348	330		150	300			gi|55235371|gb|EAA15121.2| ENSANGP00000005193 [Anopheles gambiae str. PEST] ENSANGP00000005193 [Anopheles gambiae str. PEST]
sw00825	224	410	0.7956	206	365		133	273		104	271			gi|13124654|sp|Q9UPV9|OI106_HUMAN 106 kDa O-GlcNAc transferase-interacting protein (Trafficking protein, kinesin-binding 1)
sw00826	297	437	0.8946	143	293		46	155		37	162
sw00827	302	456	0.7779	244	293		96	232		69	204			gi|13279335|gb|AAH04361.1| Pleckstrin homology, Sec7 and coiled/coil domains 2, isoform 1 [Homo sapiens] cytohesin-2 [Homo sapiens] Cytohesin-2 (ARF nucleotide-binding site opener) (ARNO protein) (ARF exchange factor) pleckstrin homology, Sec7 and coiled/coil domains 2 isoform 1 [Homo sapiens]
sw00830	1222	1130	1.2146	1218	1328	0.9879	629	1105	0.5669	589	938	0.7291		gi|55632157|ref|XP_520201.1| PREDICTED: similar to haloacid dehalogenase-like hydrolase domain containing 3; chromosome 9 open reading frame 158 [Pan troglodytes]
sw00832	329	378		1171	497	2.2807	3629	547	5.8239	126	194			gi|27924034|tpg|DAA00396.1| TPA: TPA_exp: Dyggve-Melchior-Clausen syndrome protein [Homo sapiens] Dymeclin (Dyggve-Melchior-Clausen syndrome protein)
sw00833	311	399		480	554	1.0811	355	344		387	356
sw00837	525	553	1.1173	350	530	0.8818	162	237		261	384			gi|62471635|ref|NP_001014485.1| CG33515-PA [Drosophila melanogaster] CG33515-PA [Drosophila melanogaster]
sw00839	503	487	1.1061	434	662	0.7641	206	355		249	343
sw00843	1151	1177	0.8904	961	1095	0.9423	780	1014	0.8971	354	1203	0.3327		gi|2352298|gb|AAB84380.1| high-affinity Na+-dependent glutamate transporter [Trichoplusia ni]
sw00845	2049	2771	0.7222	2225	2488	0.9647	2993	3284	0.9185	1847	1354	1.4624		gi|25009816|gb|AAN71079.1| AT16867p [Drosophila melanogaster]
sw00847	767	816	0.9117	596	861	0.7694	464	984	0.6134	735	1029	0.8024		gi|66508763|ref|XP_624485.1| PREDICTED: similar to Exosome complex exonuclease RRP46 (Ribosomal RNA processing protein 46) (Exosome component 5) (p12B) (Chronic myelogenous leukemia tumor antigen 28) [Apis mellifera]
sw00850	523	725	0.8416	462	516	1.0803	285	348		334	421	1.1996		gi|54637002|gb|EAL26405.1| GA14087-PA [Drosophila pseudoobscura]
sw00854	4942	3008	1.5495	4994	4316	1.1595	4915	3561	1.73	938	5016	0.1826		gi|25992174|gb|AAN77090.1| masquerade-like serine proteinase homolog [Bombyx mori]
sw00861	4488	4261	0.9261	5530	5249	1.0528	5475	4623	1.2239	5380	3796	1.2484		gi|62648653|ref|XP_232675.3| PREDICTED: similar to aspartly beta-hydroxylase [Rattus norvegicus]
sw00862	299	429	0.9042	345	561	0.7579	57	159		108	228			gi|50795056|ref|XP_428071.1| PREDICTED: similar to ligase I [Gallus gallus]
sw00863	1681	1222	1.3288	1416	1271	1.114	1306	597	2.5663	1032	1013	1.2455		gi|68356762|ref|XP_685406.1| PREDICTED: similar to ligase I [Danio rerio]
sw00865	230	350		297	441	0.9007	71	184		94	231			gi|48097250|ref|XP_391861.1| PREDICTED: similar to caveolin-3 [Apis mellifera]
sw00867	878	982	0.9372	702	744	1.0503	309	406	1.0073	438	464	1.3165
sw00869	1511	1797	0.9039	1159	1302	0.9788	397	533	0.8616	589	959	0.7608
sw00870	368	518	0.8693	292	366		160	210		25	255			gi|55239132|gb|EAA11535.2| ENSANGP00000012981 [Anopheles gambiae str. PEST] ENSANGP00000012981 [Anopheles gambiae str. PEST]
sw00871	1772	1797	0.9769	2631	2063	1.3321	1489	2253	0.7482	297	1338	0.3148		gi|27884034|gb|AAO23957.1| HZGJ [Homo sapiens]
sw00877	1037	1087	1.0836	1034	1056	1.0918	746	621	1.3816	564	752	0.9734
sw00879	407	462	1.047	314	462	0.865	119	235		261	536	0.741		gi|66557991|ref|XP_625041.1| PREDICTED: similar to putative DNA topoisomerase [Apis mellifera]
sw00881	1369	1346	1.1798	1918	1737	1.2677	1325	1135	1.2575	2011	3585	0.5617		gi|8421|emb|CAA34861.1| Ref(2)P protein [Drosophila melanogaster]
sw00883	282	383		455	560	0.9576	64	213		40	159			gi|11907986|gb|AAG41424.1| fry [Drosophila melanogaster]
sw00885	961	1217	0.9335	1368	1447	1.0745	283	1212	0.2523	73	1174	0.0894
sw00886	651	776	0.9828	692	654	1.2783	198	238		75	405	0.4201		gi|2160478|dbj|BAA04212.1| ryanodine receptor homologue [Drosophila melanogaster]
sw00887	8491	5370	1.2546	12447	10341	1.1302	8319	8082	1.2275	20240	2704	5.4185		gi|33285891|gb|AAQ01563.1| promoting protein [Bombyx mori]
sw00888	281	357		314	425	0.8451	129	289		127	318			gi|27806235|ref|NP_776938.1| centaurin, alpha 1 [Bos taurus] phosphatidylinositol-3,4,5-triphosphate binding protein [Bos taurus]
sw00890	948	913	1.1927	1278	1317	1.1039	639	862	0.901	887	1029	1.0948		gi|25012547|gb|AAN71375.1| RE35747p [Drosophila melanogaster]
sw00891	820	857	0.9919	625	687	1.0369	795	768	1.38	822	843	1.13		gi|46237666|emb|CAE84041.1| guanine nucleotide binding protein-like 1 [Rattus norvegicus] guanine nucleotide binding protein-like 1 [Rattus norvegicus]
sw00894	952	969	1.1212	534	671	0.9693	265	376		243	687	0.5382		gi|68394743|ref|XP_695146.1| PREDICTED: similar to yeast INO80-like protein [Danio rerio]
sw00896	163	265		383	502	0.8297	78	215		69	200
sw00897	16785	16423	0.8514	22245	13913	1.4994	20153	13281	1.7771	3292	17106	0.1488
sw00900	687	1000	0.708	388	432	1.0403	181	427	0.6531	57	996	0.0684		gi|66504174|ref|XP_624735.1| PREDICTED: similar to CG32694-PA, isoform A [Apis mellifera]
sw00901	233	345		456	539	1.072	64	172		62	280			gi|25986565|gb|AAL38977.1| multivitamin transporter [Aedes aegypti]
sw00904	377	440	0.9639	326	357		197	310		140	358			gi|28972756|dbj|BAC65794.1| mKIAA1450 protein [Mus musculus]
sw00907	1169	1168	0.9789	1014	902	1.219	1069	1107	1.1934	1230	646	2.2389		gi|73954897|ref|XP_546411.2| PREDICTED: similar to Signal recognition particle receptor alpha subunit (SR-alpha) (Docking protein alpha) (DP-alpha) [Canis familiaris]
sw00909	357	511	0.9222	377	484	1.0205	171	287		108	267
sw00910	235	257		450	478	1.2469	168	165		277	176			gi|8572742|gb|AAF77184.1| SNS [Drosophila melanogaster]
sw00911	344	417	0.9867	331	374		172	211		109	346			gi|1177230|gb|AAB08974.1| zinc finger; Method: conceptual translation supplied by author [Homo sapiens]
sw00912	254	282		284	400	0.8519	64	200		103	235
sw00915	661	630	1.0537	723	724	1.0765	597	431	1.7416	373	221			gi|27374222|gb|AAO00985.1| CG14291-PA [Drosophila erecta]
sw00916	315	357		504	428	1.2884	91	161		123	271			gi|55241123|gb|EAL40608.1| ENSANGP00000026666 [Anopheles gambiae str. PEST] ENSANGP00000026666 [Anopheles gambiae str. PEST]
sw00917	3263	2918	1.0335	4343	4612	0.8933	2614	3392	0.832	2777	3127	0.9195		gi|27462592|gb|AAO15491.1| eIF2 alpha subunit [Spodoptera frugiperda]
sw00918	364	374		442	486	1.1073	36	153		64	153
sw00919	1316	988	1.2601	881	1044	0.8847	596	759	0.9308	1001	1158	1.0265
sw00920	789	2225	0.3096	860	3407	0.219	192	359		192	640	0.4202		gi|16604137|gb|AAL27237.1| Prion-like-(q/n-rich)-domain-bearing protein protein 25 [Caenorhabditis elegans] Prion-like-(Q/N-rich)-domain-bearing protein family member (pqn-25) [Caenorhabditis elegans] Glutamine/asparagine-rich protein pqn-25
sw00921	263	393		275	402	0.9047	105	226		100	307			gi|72006339|ref|XP_787160.1| PREDICTED: similar to Protein C10orf22 [Strongylocentrotus purpuratus]
sw00922	365	443	1.0547	310	517	0.7419	45	271		20	351
sw00924	2847	2587	0.9449	3246	3346	0.8408	2245	2713	0.8862	1749	1998	1.0833		gi|87248369|gb|ABD36237.1| NADH dehydrogenase (ubiquinone) Fe-S protein 8 [Bombyx mori]
sw00926	1006	859	1.345	1200	1110	1.1508	595	719	0.9132	407	616	0.9259		gi|73973167|ref|XP_532185.2| PREDICTED: similar to DNA primase large subunit, 58kDa isoform 1 [Canis familiaris]
sw00927	1280	1349	0.8498	1467	1155	1.2686	755	896	0.9766	644	918	0.883		gi|73957464|ref|XP_546866.2| PREDICTED: similar to dihydrouridine synthase 2-like (SMM1, S. cerevisiae) [Canis familiaris]
sw00928	308	401	0.8991	349	445	0.8808	39	170		53	219
sw00929	1552	1671	0.9247	1623	1597	1.0494	1081	1154	1.0369	484	1082	0.5931
sw00931	653	717	0.905	418	521	0.8966	222	319		198	425	0.7699
sw00934	274	492	0.7156	257	317		96	159		47	254			gi|66505111|ref|XP_394364.2| PREDICTED: similar to ENSANGP00000027544 [Apis mellifera]
sw00937	403	334	1.4263	286	329		141	183		124	193			gi|72092081|ref|XP_784878.1| PREDICTED: similar to IQ motif containing D [Strongylocentrotus purpuratus]
sw00947	56085	36075	0.9447	56075	46482	0.9902	16015	57019	0.2952	2668	57684	0.0318		gi|3913391|sp|O02387|CU17_BOMMO Larval cuticle protein LCP-17 precursor LCP17 [Bombyx mori]
sw00948	56077	34799	0.9035	84709	44462	1.2465	46369	45681	1.0903	5776	57671	0.0697		gi|3913391|sp|O02387|CU17_BOMMO Larval cuticle protein LCP-17 precursor LCP17 [Bombyx mori]
sw00949	806	847	0.966	693	833	0.9246	382	403	1.2264	849	449	2.2121		gi|58569859|gb|AAW79050.1| GekBS204P [Gekko japonicus]
sw00951	262	310		511	392	1.44	120	186		79	209			gi|30923730|gb|EAA46207.1| CG17131-PA.3 [Drosophila melanogaster]
sw00954	743	881	0.9715	1275	1387	0.9197	396	1229	0.3561	142	536	0.4524		gi|47117013|sp|Q7M4I6|PA2_MEGPE Phospholipase A2 (Phosphatidylcholine 2-acylhydrolase)
sw00958	237	343		394	526	0.8608	177	238		126	255
sw00959	910	850	0.9928	766	714	1.1031	229	313		221	546	0.5487
sw00960	429	419	1.049	490	555	0.8887	110	274		184	225
sw00961	161	266		185	422	0.828	52	193		58	172
sw00963	351	528	0.9703	373	631	0.9743	413	335	1.4399	223	437	0.8511		gi|50787548|ref|XP_423512.1| PREDICTED: similar to eukaryotic translation initiation factor 2B, partial [Gallus gallus]
sw00964	387	557	0.9741	442	684	0.9349	465	735	0.6431	240	323			gi|13506751|gb|AAK28318.1| putative deoxynucleoside kinase [Bombyx mori]
sw00966	2364	2778	0.9341	3384	4092	1.0091	4129	4629	0.9398	3278	2024	1.5794		gi|7440016|pir||JC5890 proliferating cell nuclear antigen - silkworm Proliferating cell nuclear antigen (PCNA) (Cyclin) PCNA [Bombyx mori]
sw00968	330	424	1.1766	341	479	1.1096	219	291		130	282
sw00969	349	489	0.9907	251	406	1.066	180	354		50	239
sw00972	1295	1387	1.0781	1950	1851	1.2749	1242	1162	1.028	863	1413	0.6725
sw00977	611	862	0.8919	593	734	1.1067	537	929	0.5787	207	773	0.4144
sw00978	235	397		257	410	1.0591	207	311		245	344			gi|158189|gb|AAA28842.1| protein tyrosine phosphatase (DPTP) precursor
sw00982	215	368		262	434	1.0018	229	321		55	200
sw00984	347	541	0.8757	484	693	0.8922	196	334		162	350			gi|3676149|emb|CAA21135.1| EG:84H4.4 [Drosophila melanogaster]
sw00985	2270	2465	0.9979	2124	2871	0.8871	3237	3667	0.9121	2835	2200	1.2955		gi|55241583|gb|EAA44795.2| ENSANGP00000022354 [Anopheles gambiae str. PEST] ENSANGP00000022354 [Anopheles gambiae str. PEST]
sw00986	283	394		225	418	0.9351	141	274		72	179			gi|66559211|ref|XP_397051.2| PREDICTED: similar to two pore channel 1 [Apis mellifera]
sw00991	215	353		286	517	0.8359	170	451	0.5102	68	402	0.3721		No hits found
sw00992	4543	5830	0.7262	6265	7214	0.8938	7116	8915	0.8162	5497	3737	1.3526		gi|6523289|emb|CAB62210.1| human thiol peroxidase homologous protein [Homo sapiens] peroxisomal membrane protein 20 [Homo sapiens] putative peroxisomal antioxidant enzyme [Homo sapiens]
sw00993	3775	3069	1.2463	5861	5102	1.2651	7607	7435	0.9967	16873	2381	4.4368		gi|28948808|pdb|1NBH|D Chain D, Structure Of Glycine N-Methyltransferase Complexed With S- Adenosylmethionine And Acetate, Gnmt:sam:ace Chain C, Structure Of Glycine N-Methyltransferase Complexed With S- Adenosylmethionine And Acetate, Gnmt:sam:ace Chain B, Structure Of Glycine N-Methyltransferase Complexed With S- Adenosylmethionine And Acetate, Gnmt:sam:ace Chain A, Structure Of Glycine N-Methy…
sw00994	472	494	1.2375	225	273		231	273		272	531	0.7418		gi|24646442|ref|NP_650250.2| CG7518-PB, isoform B [Drosophila melanogaster] CG7518-PB, isoform B [Drosophila melanogaster]
sw00995	335	418	1.0331	225	357		139	261		130	236
sw00996	341	430	1.0141	462	516	1.1534	161	235		101	231			gi|72005845|ref|XP_786836.1| PREDICTED: similar to sirtuin (silent mating type information regulation 2 homolog) 6 [Strongylocentrotus purpuratus]
sw00998	766	773	1.1777	798	901	1.0911	875	1017	0.9803	758	914	0.9888		gi|85857558|gb|ABC86314.1| IP15869p [Drosophila melanogaster]
sw00999	356	518	0.8582	333	589	0.8088	223	297		338	322			gi|4507811|ref|NP_003349.1| ceramide glucosyltransferase [Homo sapiens] UDP-glucose ceramide glucosyltransferase [Homo sapiens] Ceramide glucosyltransferase [Homo sapiens] UDP-glucose ceramide glucosyltransferase [synthetic construct] Ceramide glucosyltransferase (Glucosylceramide synthase) (GCS) (UDP-glucose:N-acylsphingosine D-glucosyltransferase) (UDP-glucose ceramide glucosyltransferase) (GLC…
sw01002	434	560	1.0217	287	487	0.8945	695	770	1.0671	105	397
sw01009	943	877	1.2621	859	859	1.2193	1265	766	1.7046	860	993	1.0068
sw01010	624	762	0.9909	493	538	1.1383	198	299		152	284			gi|54644573|gb|EAL33314.1| GA21473-PA [Drosophila pseudoobscura]
sw01011	338	410	0.9724	302	407	1.0272	102	246		74	190			gi|85861136|gb|ABC86516.1| AT29264p [Drosophila melanogaster]
sw01012	326	431	0.9276	299	459	0.8412	65	210		87	221			gi|1621117|gb|AAC47315.1| Frazzled [Drosophila melanogaster]
sw01013	427	544	1.0292	543	570	1.245	204	234		233	372
sw01015	4316	3373	1.1065	3825	2878	1.2991	5234	3658	1.4053	3929	2795	1.4807		gi|6006748|gb|AAF00596.1| hnRNP K protein homolog [Drosophila melanogaster]
sw01018	505	643	0.9765	245	350		122	189		116	287
sw01021	2784	2748	1.0158	3183	3188	1.0473	3564	2989	1.1333	1644	3059	0.572		gi|14278159|pdb|1FSO|A Chain A, Crystal Structure Of Truncated Human Rhogdi Quadruple Mutant
sw01022	267	344		265	391		96	242		471	294	2.2415		gi|66572610|gb|AAY48020.1| inosine-uridine preferring nucleoside hydrolase [Xanthomonas campestris pv. campestris str. 8004] inosine-uridine preferring nucleoside hydrolase [Xanthomonas campestris pv. campestris str. 8004]
sw01027	871	1068	0.7448	845	890	1.0365	490	969	0.6482	150	608	0.3513		gi|457733|emb|CAA82998.1| torso like [Drosophila melanogaster] torso-like protein
sw01029	362	417	1.098	248	358		49	193		157	254			gi|90508|pir||A32621 gelsolin, cytosolic - mouse murine gelsolin protein
sw01031	393	470	0.8942	240	348		76	233		55	184
sw01032	8849	6654	1.031	13205	10570	1.0277	9473	8030	1.1448	1132	9560	0.0861		gi|72083296|gb|AAZ66313.1| RE64894p [Drosophila melanogaster]
sw01033	371	483	0.9643	225	366		57	214		76	194
sw01035	479	454	1.147	279	334		134	205		126	207			gi|55587346|ref|XP_524725.1| PREDICTED: similar to dedicator of cytokinesis 7 [Pan troglodytes]
sw01037	385	462	1.0401	304	410	1.0321	89	194		95	248			gi|72005132|ref|XP_780012.1| PREDICTED: similar to peptidylprolyl isomerase domain and WD repeat containing 1 isoform 1 [Strongylocentrotus purpuratus]
sw01040	488	455	1.1934	1163	949	1.1696	486	425	1.3152	343	608	0.7649
sw01041	306	355		287	432	0.9429	146	233		149	269			gi|54311389|gb|AAH84800.1| LOC495338 protein [Xenopus laevis]
sw01043	621	596	1.1278	308	464	0.8695	132	238		23	464	0.1484		gi|998752|gb|AAB34514.1| Lm-ACP19=wing cuticle protein [Locusta migratoria=migratory locusts, wings, Peptide, 157 aa] Cuticle protein 19 (LM-19) (LM-ACP 19)
sw01044	460	467	1.1146	625	565	1.1269	148	219		185	329			gi|6760453|gb|AAF28358.1| LDL-related protein LRP6 [Drosophila melanogaster]
sw01046	326	407	1.0382	495	473	1.266	18	209		120	214			gi|54644330|gb|EAL33071.1| GA18017-PA [Drosophila pseudoobscura]
sw01049	278	384		393	472	1.1326	67	191		108	183			gi|28569548|gb|AAO43730.1| kekkon5 precursor [Drosophila melanogaster]
sw01050	347	473	0.9276	407	578	0.8512	39	129		81	183			gi|27529748|dbj|BAA76788.2| KIAA0944 protein [Homo sapiens]
sw01051	1034	1232	0.8037	1034	1097	0.9825	802	861	1.0337	169	781	0.3212		gi|18369806|dbj|BAB84098.1| carbo protein [Drosophila ananassae]
sw01054	1164	1099	1.1319	1465	1678	0.931	642	972	0.7553	1009	922	1.406		gi|17863026|gb|AAL39990.1| SD09147p [Drosophila melanogaster]
sw01059	457	501	1.0652	548	597	1.0748	193	290		143	388			gi|12963641|ref|NP_075817.1| ATP/GTP binding protein 1 [Mus musculus] nuclear ATP/GTP-binding protein [Mus musculus]
sw01060	349	369		473	491	1.1037	321	499	0.7394	310	322
sw01062	465	578	0.9587	506	522	1.1986	403	304	1.7345	1492	275	7.2218		gi|84095074|dbj|BAE66652.1| phenylalanine hydroxylase [Papilio xuthus]
sw01063	398	490	0.9529	299	485	0.7739	89	310		98	251			gi|17945534|gb|AAL48819.1| RE24382p [Drosophila melanogaster]
sw01064	409	474	0.991	249	319		137	234		131	323
sw01068	486	594	0.9027	656	544	1.3248	615	563	1.3048	1197	691	2.0123		gi|20126654|dbj|BAB88907.1| seven-up beta [Bombyx mori]
sw01073	298	538	0.7567	377	498	0.9929	143	333		156	430	0.6584		gi|45553483|ref|NP_996278.1| Myosin 95E CG5501-PD, isoform D [Drosophila melanogaster] unconventional myosin 95E isoform I [Drosophila melanogaster] CG5501-PD, isoform D [Drosophila melanogaster]
sw01074	237	391		516	491	1.3254	94	211		80	194
sw01075	395	589	0.7831	401	528	0.9087	148	323		246	237			gi|68368320|ref|XP_692814.1| PREDICTED: similar to Protein C21orf63 homolog precursor [Danio rerio]
sw01076	462	477	1.0854	572	595	1.0077	214	388		503	512	1.5634		gi|57236096|gb|AAW48725.1| dicer-2 [Aedes aegypti]
sw01077	515	668	0.9705	719	788	1.093	217	319		344	559	0.9506		gi|72004569|ref|XP_786888.1| PREDICTED: similar to WD repeat domain 32 [Strongylocentrotus purpuratus]
sw01078	5647	4858	1.1476	7921	8170	0.9575	5283	5678	1.0061	9481	4471	1.9758		gi|87248127|gb|ABD36116.1| electron-transfer-flavoprotein beta polypeptide [Bombyx mori]
sw01081	391	461	1.136	446	541	1.0627	225	228		209	463	0.773		gi|60677765|gb|AAX33389.1| RE67575p [Drosophila melanogaster]
sw01082	7285	5829	1.2173	10733	6530	1.6485	12270	5408	2.167	25314	3047	7.4402		gi|7106224|gb|AAF36090.1| flagelliform silk protein [Nephila clavipes]
sw01084	6381	4784	1.0718	12310	6313	1.763	3214	4411	0.8638	342	3535	0.1114
sw01085	403	457	1.1782	564	557	1.305	369	523	0.8317	27	354
sw01086	290	393		405	493	1.0504	32	160		37	171			No hits found
sw01087	521	643	0.9042	362	519	0.8428	492	820	0.7822	310	656	0.6685		gi|1706173|sp|Q03751|CSP_DROME Cysteine string protein csp32
sw01088	125	214		539	563	1.0115	20	166		74	223			gi|51873075|gb|AAU12503.1| nicotinic acetylcholine receptor subunit alpha 1 [Anopheles gambiae]
sw01090	316	470	0.9176	388	510	1.0051	83	254		56	488	0.272
sw01091	282	332		582	546	1.2212	88	236		76	162			gi|68371228|ref|XP_698527.1| PREDICTED: similar to inositol polyphosphate-5-phosphatase F isoform 1 [Danio rerio]
sw01092	431	496	0.9555	333	396		91	227		112	359			gi|76618609|ref|XP_613582.2| PREDICTED: similar to Protein KIAA0286 [Bos taurus]
sw01095	2339	1908	1.119	1773	2201	0.7727	792	1847	0.487	214	2400	0.0852
sw01096	13743	13923	0.7493	14193	19940	0.5442	2280	15748	0.1864	440	18845	0.0133		gi|55242208|gb|EAL40896.1| ENSANGP00000027230 [Anopheles gambiae str. PEST] ENSANGP00000012173 [Anopheles gambiae str. PEST] ENSANGP00000027230 [Anopheles gambiae str. PEST] ENSANGP00000012173 [Anopheles gambiae str. PEST]
sw01097	234	410	0.8171	326	449	0.9752	34	293		40	230
sw01099	6987	4140	1.4269	5689	3258	1.698	4435	2428	2.3516	783	5357	0.1206		gi|29134779|dbj|BAC66140.1| projectin [Procambarus clarkii]
sw01101	232	430	0.7704	451	497	1.1679	108	207		82	239			gi|27734721|ref|NP_002596.1| phosphodiesterase 8A isoform 1 [Homo sapiens] Phosphodiesterase 8A, isoform 1 [Homo sapiens] cAMP phosphodiesterase PDE8A1 [Homo sapiens] High-affinity cAMP-specific and IBMX-insensitive 3',5'-cyclic phosphodiesterase 8A
sw01103	1195	1168	0.999	944	827	1.2502	53	287		143	1119	0.1508		gi|66507056|ref|XP_396564.2| PREDICTED: similar to CG6131-PA [Apis mellifera]
sw01104	1254	1016	1.1917	1332	1456	0.8643	736	1246	0.6947	944	1393	0.8477		gi|68371190|ref|XP_696017.1| PREDICTED: similar to programmed cell death 2 [Danio rerio]
sw01106	223	359		289	434	0.8599	31	219		66	257
sw01107	2556	1713	1.3331	1889	1267	1.4571	933	664	1.6526	1243	1377	1.0412		gi|15425681|dbj|BAB64297.1| I-connectin [Procambarus clarkii]
sw01108	407	533	0.8244	433	541	0.8498	172	380		226	365			gi|72147101|ref|XP_795994.1| PREDICTED: similar to ELOVL family member 6, elongation of long chain fatty acids [Strongylocentrotus purpuratus]
sw01110	83	227		133	386		703	548	1.3483	335	138			gi|55244191|gb|EAL41409.1| ENSANGP00000027433 [Anopheles gambiae str. PEST] ENSANGP00000027433 [Anopheles gambiae str. PEST]
sw01111	402	483	0.8932	374	509	0.877	87	190		127	184			gi|64729|emb|CAA49351.1| glutathione synthase [Xenopus laevis] Glutathione synthetase (Glutathione synthase) (GSH synthetase) (GSH-S)
sw01113	173	329		356	499	0.8879	262	383		576	292	2.7063
sw01114	211	320		337	400	1.0923	37	175		62	236
sw01115	527	566	0.9579	340	445	0.9371	170	331		132	345
sw01116	5988	4254	1.1395	7364	6951	0.8845	4063	5460	0.8164	5132	5262	1.0351		gi|55246530|gb|EAA03435.2| ENSANGP00000016347 [Anopheles gambiae str. PEST] ENSANGP00000015849 [Anopheles gambiae str. PEST] ENSANGP00000015849 [Anopheles gambiae str. PEST] ENSANGP00000016347 [Anopheles gambiae str. PEST]
sw01118	11885	9157	1.1555	12629	5987	2.197	9619	4665	2.1325	1108	10695	0.1146		gi|72065732|ref|XP_798089.1| PREDICTED: similar to Myosin light chain kinase, smooth muscle and non-muscle isozymes (MLCK) [Strongylocentrotus purpuratus]
sw01120	347	387		516	513	1.0671	47	160		118	261			gi|73956833|ref|XP_546785.2| PREDICTED: similar to conserved nuclear protein NHN1 isoform 2 [Canis familiaris]
sw01123	413	530	0.8328	473	603	0.8581	65	421	0.2981	29	359			gi|505621|gb|AAA21588.1| high affinity nuclear juvenile hormone binding protein
sw01124	328	387		503	508	1.0119	34	234		100	205
sw01126	425	515	0.978	718	723	1.1061	179	246		242	342			gi|66517987|ref|XP_393721.2| PREDICTED: similar to hypothetical rhabdomyosarcoma antigen MU-RMS-40.15 [Apis mellifera]
sw01128	305	364		411	424	1.0274	67	173		142	267			gi|51849654|dbj|BAD42358.1| heat shock protein 70 [Chironomus yoshimatsui]
sw01130	602	556	1.2074	749	550	1.5686	225	281		702	415	1.9067		gi|55235760|gb|EAA14411.2| ENSANGP00000020885 [Anopheles gambiae str. PEST] ENSANGP00000020885 [Anopheles gambiae str. PEST]
sw01133	2817	2896	0.932	3676	2399	1.5337	4878	2638	1.8605	852	2048	0.516		gi|158749|gb|AAA28993.1| tubulin-beta-3
sw01135	3739	2258	1.3631	2750	2442	1.0838	2752	1938	1.4627	2689	2609	1.0286		gi|68357106|ref|XP_709875.1| PREDICTED: similar to Farsla protein isoform 5 [Danio rerio]
sw01138	16042	13567	1.0406	21544	19713	0.9448	15008	18559	0.9122	15306	16594	0.8279		gi|15213778|gb|AAK92164.1| ribosomal protein L28 [Spodoptera frugiperda] 60S ribosomal protein L28
sw01139	5135	4453	0.8981	3241	2196	1.4446	3206	2085	1.699	391	3917	0.0986		gi|87248125|gb|ABD36115.1| EN protein binding/engrailed nuclear homeoprotein-regulated protein [Bombyx mori]
sw01140	395	397		478	455	1.0656	88	230		126	243
sw01142	395	634	0.7806	280	350		50	235		38	331			gi|57087751|ref|XP_546987.1| PREDICTED: similar to Basic helix-loop-helix protein MIST1 (Muscle, intestine and stomach expression 1) [Canis familiaris]
sw01144	672	651	0.9896	783	686	1.0659	155	321		195	382			gi|21361380|ref|NP_009172.2| EAP30 subunit of ELL complex [Homo sapiens] EAP30 subunit of ELL complex [Homo sapiens] Vacuolar sorting protein SNF8 (ELL-associated protein of 30 kDa)
sw01146	290	439	0.8705	563	465	1.318	136	202		98	270			gi|1589736|gb|AAB09663.1| Sox9 transcription factor [Gallus gallus] Transcription factor SOX-9
sw01147	394	447	0.9147	393	403	1.0765	73	218		128	292			gi|464960|sp|P35047|TRYC_MANSE Trypsin, alkaline C precursor
sw01148	2265	1941	0.9761	1717	1271	1.1772	657	954	0.7558	156	2138	0.1036		gi|55245484|gb|EAA04134.2| ENSANGP00000019058 [Anopheles gambiae str. PEST] ENSANGP00000019058 [Anopheles gambiae str. PEST]
sw01149	3052	2039	1.3374	3614	3001	1.1714	2663	2352	1.194	454	1815	0.3595		gi|61889092|ref|NP_077325.2| adenylate kinase 1 [Rattus norvegicus] Adenylate kinase 1 [Rattus norvegicus]
sw01150	3900	4744	0.8156	4446	4482	0.9238	7108	5594	1.3738	388	3884	0.1276		gi|28317019|gb|AAO39529.1| RE22259p [Drosophila melanogaster]
sw01151	392	411	0.9965	372	366		134	194		150	259			gi|72022670|ref|XP_795192.1| PREDICTED: similar to ATP-NAD kinase (2M349) [Strongylocentrotus purpuratus]
sw01154	3702	2988	1.3073	4113	5070	0.9694	4389	4107	1.1261	3302	3665	0.8922		gi|13259512|ref|NP_075012.1| survival of motor neuron 1, telomeric isoform b [Homo sapiens] survival of motor neuron 2, centromeric isoform b [Homo sapiens]
sw01155	823	1106	0.9367	776	1095	1.023	1617	1332	1.2027	284	867	0.5113		gi|72042996|ref|XP_781064.1| PREDICTED: similar to Blooms syndrome protein (RecQ protein-like 3) (DNA helicase, RecQ-like, type 2), partial [Strongylocentrotus purpuratus]
sw01156	290	403	1.115	361	662	0.8054	362	432	0.9746	618	314	2.6817		gi|76647092|ref|XP_881948.1| PREDICTED: similar to Ras protein-specific guanine nucleotide-releasing factor 1 isoform 1 isoform 4 [Bos taurus]
sw01162	349	429	1.168	340	471	1.1865	177	264		119	209			gi|66533067|ref|XP_624224.1| PREDICTED: similar to ENSANGP00000018336 [Apis mellifera]
sw01163	325	569	0.8416	333	603	0.9286	343	459	0.902	268	394			gi|72082629|ref|XP_781490.1| PREDICTED: similar to Protein kinase C and casein kinase substrate in neurons protein 1 (Synaptic, dynamin-associated protein I) (Syndapin 1) (Syndapin-I) (SdpI) (Dynamin proline-rich domain-interacting protein) (Dynamin PRD-interacting protein)... [Strongylocentrotus purpuratus]
sw01168	311	388		311	437	1.1465	48	219		118	211
sw01176	560	833	0.8311	565	537	1.4121	1025	598	1.71	301	587	0.6751		gi|48098060|ref|XP_393966.1| PREDICTED: similar to GA15368-PA [Apis mellifera]
sw01177	225	354		209	400	0.931	97	208		40	169
sw01181	1559	2509	0.6791	1774	2583	0.8299	2235	3385	0.6634	1039	1819	0.6258		gi|33621866|gb|AAQ23388.1| Rab7 [Aiptasia pulchella] Rab7 protein - sea anemone (Aiptasia pulchella)
sw01182	128	264		144	425	0.6615	109	258		37	235			gi|61553752|gb|AAX46453.1| G protein-coupled receptor 89 [Bos taurus] G protein-coupled receptor 89 [Bos taurus] Protein GPR89
sw01184	482	603	1.0572	343	522	0.9105	225	332		119	259			gi|58257714|dbj|BAB47490.2| KIAA1861 protein [Homo sapiens]
sw01185	16556	14447	0.9592	18985	17057	1.1625	18823	16370	1.1531	2301	21228	0.0919
sw01188	4838	5224	0.7881	5203	5850	0.8481	7034	7810	0.7971	3226	5009	0.5851		gi|21355663|ref|NP_650536.1| CG10311-PA [Drosophila melanogaster] RE61190p [Drosophila melanogaster] CG10311-PA [Drosophila melanogaster]
sw01190	437	429	1.3351	472	613	1.0472	379	499	0.9659	263	384			gi|71051204|gb|AAH99382.1| 2600005O03Rik protein [Mus musculus]
sw01193	321	440	1.0202	508	512	1.366	804	525	1.6109	1016	331	3.312
sw01194	572	1039	0.6982	405	925	0.6272	1122	993	1.3001	473	481	1.2974
sw01195	1731	1659	1.0429	2102	1961	1.1654	1653	2009	0.8837	1954	2186	0.8332
sw01196	1393	1546	0.9101	957	1113	0.9778	809	677	1.2233	555	840	0.825		gi|1019427|gb|AAA82986.1| p125
sw01198	845	1022	0.9708	592	834	0.9307	295	522	0.7136	224	428	0.8057		gi|68404213|ref|XP_684789.1| PREDICTED: similar to Phosphatidylinositol glycan, class N [Danio rerio]
sw01201	43406	36961	0.9303	67300	54370	1.0411	30784	57044	0.5469	15735	39380	0.3327		gi|3913391|sp|O02387|CU17_BOMMO Larval cuticle protein LCP-17 precursor LCP17 [Bombyx mori]
sw01205	309	471	0.8998	174	352		31	172		40	243			gi|66514809|ref|XP_392503.2| PREDICTED: similar to transposase [Apis mellifera]
sw01211	870	779	1.1401	471	598	0.9815	348	380		312	341
sw01215	870	936	0.9313	607	665	1.0829	361	628	0.7387	173	358
sw01216	2752	2936	0.8622	2431	2257	1.0223	2918	2385	1.1228	241	2062	0.1152		gi|203921|gb|AAB59684.1| D-beta-hydroxybutyrate dehydrogenase
sw01220	293	380		526	488	1.1625	321	354		106	329			gi|72111027|ref|XP_794353.1| PREDICTED: similar to ciliary rootlet coiled-coil, rootletin [Strongylocentrotus purpuratus]
sw01223	596	587	1.0519	235	408	0.7855	319	271		293	463	0.8921
sw01225	767	924	0.9195	841	980	0.9989	758	845	0.9039	800	530	1.9006
sw01227	506	516	1.035	648	604	1.2312	392	622	0.8318	560	419	1.8142		gi|5081626|gb|AAD39472.1| origin recognition complex subunit 3 [Drosophila melanogaster]
sw01229	2460	2507	0.9321	2315	3128	0.8074	2229	2036	1.0944	3286	3865	0.8024		gi|55650502|ref|XP_514458.1| PREDICTED: similar to Protein C20orf54 [Pan troglodytes]
sw01232	737	713	1.0495	486	640	0.8312	218	495	0.5521	426	485	1.2457		gi|45549118|ref|NP_511069.3| brinker CG9653-PA [Drosophila melanogaster] CG9653-PA [Drosophila melanogaster] putative transcription factor [Drosophila melanogaster] Brk [Drosophila melanogaster]
sw01234	1159	1123	1.1007	1429	1467	1.0444	1308	1239	1.2746	912	966	1.2017		gi|21464400|gb|AAM52003.1| RE27241p [Drosophila melanogaster]
sw01238	437	511	1.0541	304	416	0.9488	178	214		272	247
sw01240	743	671	1.1704	1073	1045	0.9934	608	742	0.8817	731	608	1.401		gi|77455304|gb|ABA86461.1| CG13350 [Drosophila simulans]
sw01243	843	958	0.8794	706	503	1.5179	318	379		467	472	1.4154		gi|25012675|gb|AAN71432.1| RE54276p [Drosophila melanogaster]
sw01244	470	526	0.9949	236	318		69	242		61	226			gi|48098088|ref|XP_392003.1| PREDICTED: similar to CG32466-PB, isoform B [Apis mellifera]
sw01245	782	826	1.0164	790	807	1.1713	777	776	1.0526	555	892	0.712		gi|4336726|gb|AAD17919.1| fasciclin II transmembrane isoform [Manduca sexta]
sw01247	359	449	0.9181	336	314		95	379		93	191
sw01249	293	472	0.8497	235	412	0.8053	272	478	0.6772	242	295			gi|76647435|ref|XP_592281.2| PREDICTED: similar to breast cancer metastasis-suppressor 1-like [Bos taurus] breast cancer metastasis-suppressor 1-like [Homo sapiens] PREDICTED: similar to breast cancer metastasis-suppressor 1-like [Canis familiaris] PREDICTED: similar to breast cancer metastasis-suppressor 1-like [Rattus norvegicus] Breast cancer metastasis-suppressor 1-like [Homo sapiens]
sw01250	569	543	1.2369	744	753	1.1584	232	287		348	390			gi|5052534|gb|AAD38597.1| BcDNA.GH04245 [Drosophila melanogaster]
sw01251	673	802	0.8987	585	550	1.2687	1366	824	1.9974	2872	510	6.0534		gi|60678129|gb|AAX33571.1| HL05615p [Drosophila melanogaster]
sw01252	197	262		267	348		142	219		405	241	2.8268		gi|55235929|gb|EAA14205.3| ENSANGP00000010175 [Anopheles gambiae str. PEST] ENSANGP00000010175 [Anopheles gambiae str. PEST]
sw01253	1751	1771	1.0528	1299	1403	1.0082	1147	796	1.6427	1233	1749	0.7768
sw01254	323	343		364	405	1.1724	88	176		52	199			gi|66525911|ref|XP_395264.2| PREDICTED: similar to Cereblon [Apis mellifera]
sw01257	290	815	0.4643	512	608	1.0177	322	212		201	238
sw01258	1456	1531	0.9971	1540	1407	1.1865	1109	872	1.4967	5271	1214	4.5958		gi|157798|gb|AAA28661.1| laminin A chain
sw01259	788	895	0.9317	485	534	1.0946	335	437	0.9961	1062	726	1.7823		gi|72012237|ref|XP_782463.1| PREDICTED: similar to ATP-binding cassette, sub-family B, member 7 [Strongylocentrotus purpuratus]
sw01260	910	2034	0.4435	1342	1339	0.9843	738	838	0.9683	3797	1137	3.2404		gi|55244419|gb|EAL41476.1| ENSANGP00000026359 [Anopheles gambiae str. PEST] ENSANGP00000026359 [Anopheles gambiae str. PEST]
sw01262	280	377		426	441	1.2326	55	222		63	276			gi|1345958|sp|P12276|FAS_CHICK Fatty acid synthase [Includes: [Acyl-carrier-protein] S-acetyltransferase ; [Acyl-carrier-protein] S-malonyltransferase ; 3-oxoacyl-[acyl-carrier-protein] synthase ; 3-oxoacyl-[acyl-carrier-protein] reductase ; 3-hydroxypalmitoyl-[acyl-carrier-protein] dehydratase ; Enoyl-[acyl-carrier-protein] reductase ; Oleoyl-[acyl-carrier-protein] hydrolase ] fatty acid synthase
sw01265	20040	11218	1.5781	23706	21008	1.0818	15878	17151	1.0548	8723	16856	0.3804		gi|56378321|dbj|BAD74197.1| heat shock protein hsp21.4 [Bombyx mori]
sw01266	4588	4018	1.1449	4489	4159	1.1172	3249	2926	1.1924	2921	4500	0.663		gi|55235576|gb|EAA15019.3| ENSANGP00000010532 [Anopheles gambiae str. PEST] ENSANGP00000010532 [Anopheles gambiae str. PEST]
sw01269	191	297		344	469	0.9742	27	174		38	198			gi|15149556|dbj|BAB62875.1| junctophilin [Drosophila melanogaster]
sw01271	320	452	0.8669	431	486	1.0686	34	216		63	234
sw01278	483	575	1.0293	559	714	0.944	275	487	0.7697	267	454	0.9402		No hits found
sw01279	317	437	0.8911	398	464	1.0485	86	225		58	180			gi|6652822|gb|AAF22489.1| protein tyrosine phosphatase PTPpez [Drosophila silvestris]
sw01281	6189	3955	1.4219	9786	4560	2.1632	7665	2634	3.5001	9584	2828	2.1269		gi|550486|gb|AAB64306.1| pyruvate carboxylase [Aedes aegypti]
sw01282	748	981	0.8998	1009	1170	0.998	777	964	1.0016	600	822	1.0431		gi|76660805|ref|XP_588545.2| PREDICTED: similar to nucleoporin 35kDa isoform a [Bos taurus]
sw01285	14259	16076	0.7493	12776	21326	0.5348	2391	16327	0.1545	535	20791	0.031		No hits found
sw01286	3410	2477	1.4376	4047	3628	1.1206	3003	3932	0.8685	3372	3657	1.0406		gi|54640691|gb|EAL29442.1| GA19770-PA [Drosophila pseudoobscura]
sw01287	287	312		507	441	1.3597	24	186		46	148			gi|4176760|gb|AAD08922.1| cubitus interruptus [Junonia coenia]
sw01288	754	801	0.9622	1058	880	1.2346	436	396	1.3674	300	485	0.9629		gi|13905124|gb|AAH06849.1| THO complex 3 [Homo sapiens] THO complex 3 [Homo sapiens] THO complex 3 [Homo sapiens] THO complex 3 [synthetic construct] THO complex subunit 3 (Tho3) (TEX1 homolog)
sw01290	1058	1312	0.9102	1425	1269	1.2773	893	813	1.3163	1233	1277	1.2355		gi|45551552|ref|NP_729820.2| CG32112-PB, isoform B [Drosophila melanogaster] CG32112-PB, isoform B [Drosophila melanogaster]
sw01292	412	371	1.2366	684	693	1.0354	154	365		769	572	2.1228		gi|2282472|dbj|BAA21639.1| xanthine dehydrogenase [Bombyx mori]
sw01294	1059	1120	1.0862	1091	1426	0.8613	255	733	0.509	519	1111	0.6692		No hits found
sw01296	5195	5273	0.8228	7872	5317	1.3195	3341	3124	1.1597	2560	4647	0.5645		gi|66521545|ref|XP_391936.2| PREDICTED: similar to Tubulin alpha-1 chain [Apis mellifera]
sw01300	157	278		198	437	0.5587	26	223		37	216
sw01302	363	505	0.9097	436	575	0.8959	134	269		102	246			gi|3367669|emb|CAA19735.1| EG:73D1.1 [Drosophila melanogaster]
sw01303	372	396		256	400	0.8371	127	222		123	170			gi|55246014|gb|EAA04055.2| ENSANGP00000013402 [Anopheles gambiae str. PEST] ENSANGP00000013402 [Anopheles gambiae str. PEST]
sw01307	392	551	0.7411	322	453	0.8797	29	200		39	434	0.2101		No hits found
sw01309	8303	6520	1.0286	16856	13931	1.0301	9393	10244	0.9934	10209	5863	1.5342		gi|1836157|gb|AAB46908.1| fungal protease inhibitor F; FPI-F [Bombyx mori] Fungal protease inhibitor F precursor (FPI-F) fungal protease-specific inhibitor-F [Bombyx mori]
sw01310	251	426	0.7815	269	392		113	229		54	213			gi|72008999|ref|XP_786089.1| PREDICTED: similar to Protein O-mannosyl-transferase 2 (Dolichyl-phosphate-mannose--protein mannosyltransferase 2) [Strongylocentrotus purpuratus]
sw01315	2151	1327	1.4136	1565	1549	1.0061	2000	1078	1.882	1715	1714	1.0823
sw01319	408	454	0.9709	465	493	1.0564	133	225		114	299			gi|68397695|ref|XP_697439.1| PREDICTED: similar to Bardet-Biedl syndrome 1 [Danio rerio]
sw01321	376	474	0.9438	330	423	0.9886	188	224		212	335			gi|157012|gb|AAA19661.1| brahma protein
sw01322	933	1256	0.8205	1143	1115	1.1072	984	943	1.0514	97	577	0.246		gi|62132672|gb|AAX69085.1| teratocyte released chitinase [Toxoneuron nigriceps]
sw01323	3194	1983	1.3494	2952	2704	1.0439	2338	994	2.3429	1653	1538	1.1774
sw01324	2083	1860	0.9589	1927	1909	0.8759	1177	1825	0.6398	1062	1621	0.6952		gi|68697259|emb|CAJ14152.1| putative dodecenoylCoA deltaisomerase [Anopheles gambiae]
sw01325	815	951	0.905	586	661	1.0369	159	196		48	1035	0.0901		gi|28261395|gb|AAO32819.1| putative cuticle protein [Manduca sexta] putative cuticle protein [Manduca sexta]
sw01326	1674	1704	1.0227	2366	2467	0.9672	2368	2521	0.9583	2071	2093	0.9813		gi|48120544|ref|XP_393223.1| PREDICTED: similar to Zgc:55455 protein [Apis mellifera]
sw01327	2335	2089	0.9719	2687	2440	1.0596	1545	2694	0.6296	986	1596	0.7188		gi|68367804|ref|XP_695826.1| PREDICTED: similar to tripartite motif-containing 37 protein [Danio rerio]
sw01331	611	503	1.1902	424	514	0.8705	164	276		180	263			gi|11560059|ref|NP_071587.1| glutamyl aminopeptidase [Rattus norvegicus] aminopeptidase A [Rattus norvegicus]
sw01333	15092	13978	0.8014	18463	14240	1.1547	13801	17935	0.8088	1805	15773	0.1477		gi|87248131|gb|ABD36118.1| fumarylacetoacetate hydrolase [Bombyx mori]
sw01338	263	362		548	532	1.1251	65	174		91	232
sw01339	410	515	0.8163	348	358		130	239		188	300			gi|85857466|gb|ABC86269.1| RE41071p [Drosophila melanogaster]
sw01341	950	648	1.4707	748	1217	0.6795	682	916	0.8899	666	943	0.902		gi|31981163|ref|NP_080136.2| DEAD (Asp-Glu-Ala-Asp) box polypeptide 18 [Mus musculus] DEAD (Asp-Glu-Ala-Asp) box polypeptide 18 [Mus musculus] DEAD (Asp-Glu-Ala-Asp) box polypeptide 18 [Mus musculus] ATP-dependent RNA helicase DDX18 (DEAD box protein 18)
sw01344	395	444	0.9029	939	639	1.3354	62	184		119	220			gi|55650299|ref|XP_513010.1| PREDICTED: similar to lin-7-A; lin 7 homolog b (C. elegans); vertebrate homolog of C. elegans Lin-7 type 2 [Pan troglodytes]
sw01349	532	658	1.0324	393	542	1.1229	227	308		111	298			gi|50511003|dbj|BAD32487.1| mKIAA1592 protein [Mus musculus]
sw01350	4186	4242	1.0184	3592	5543	0.7782	3221	3271	1.0322	4247	3986	1.023		gi|21389320|ref|NP_082509.1| leucine-rich PPR motif-containing protein [Mus musculus] leucine rich protein mLRP130 [Mus musculus]
sw01351	1419	1521	1.0906	2187	1921	1.4574	2719	1693	1.5272	758	1834	0.5068		gi|68357652|ref|XP_693359.1| PREDICTED: similar to fetal Alzheimer antigen isoform 2 [Danio rerio]
sw01353	314	385		450	579	1.1688	164	259		71	190
sw01354	3072	2813	1.173	3236	4150	0.9535	3418	2767	1.294	2975	4523	0.6642		gi|66827359|ref|XP_647034.1| hypothetical protein DDB0190100 [Dictyostelium discoideum] hypothetical protein DDB0190100 [Dictyostelium discoideum]
sw01356	154	283		265	477	0.9023	107	263		95	182			gi|66506280|ref|XP_394455.2| PREDICTED: similar to Protein KIAA0274 [Apis mellifera]
sw01358	1353	1070	1.4876	1242	1641	1.0004	758	723	1.0609	650	2377	0.3321		gi|1346296|sp|P98092|HMCT_BOMMO Hemocytin precursor (Humoral lectin) humoral lectin prepropeptide [Bombyx mori] hemocytin
sw01361	838	1017	1.0037	863	1060	1.0481	1764	1178	1.4908	832	778	1.3198		gi|72040853|ref|XP_789038.1| PREDICTED: similar to CG6903-PA [Strongylocentrotus purpuratus]
sw01362	3188	3472	0.9268	3475	4651	0.8203	3931	4075	1.0974	3029	3109	1.0731		gi|50728037|ref|XP_415962.1| PREDICTED: similar to Mitochondrial processing peptidase beta subunit, mitochondrial precursor (Beta-MPP) (P-52) [Gallus gallus]
sw01364	2027	2745	0.7606	2397	3486	0.7297	3648	4031	0.9001	1342	2254	0.6143		gi|66507427|ref|XP_394519.2| PREDICTED: similar to calcineurin A [Apis mellifera]
sw01365	227	521	0.632	240	438	0.9307	112	305		109	318
sw01367	9906	6698	1.3818	7518	7240	1.1027	15299	5515	2.8678	1647	8404	0.2275		gi|66539393|ref|XP_393278.2| PREDICTED: similar to ENSANGP00000010211 [Apis mellifera]
sw01370	331	570	0.7909	261	525	0.7946	203	423	0.6733	194	277			gi|50593499|gb|AAT79489.1| mariner transposase C9 mutant [Mutagenesis vector pCAM45]
sw01372	2414	2456	1.0272	3035	4326	0.7364	3147	5778	0.5516	2196	2811	0.7733
sw01373	406	650	0.8416	442	649	0.9879	260	368		136	431	0.6019		gi|123387|sp|P27610|HMIN_BOMMO Homeobox protein invected invected homeodomain
sw01374	370	544	0.9251	225	500	0.7501	185	423	0.6196	24	405	0.1879
sw01376	240	401	0.8833	210	401	0.8116	102	215		89	242
sw01378	293	407	1.0269	166	248		57	198		39	209			gi|66525741|ref|XP_397234.2| PREDICTED: similar to WD repeat domain 34 [Apis mellifera]
sw01385	313	450	0.9673	450	537	1.1733	369	360		320	400	1.0702		gi|68433892|ref|XP_700948.1| PREDICTED: similar to mucin [Danio rerio]
sw01389	388	567	0.8941	600	757	1.0466	1100	1165	0.9082	2235	414	4.9665		gi|72011986|ref|XP_784622.1| PREDICTED: similar to Methylcrotonoyl-CoA carboxylase alpha chain, mitochondrial precursor (3-Methylcrotonyl-CoA carboxylase 1) (MCCase alpha subunit) (3-methylcrotonyl-CoA:carbon dioxide ligase alpha subunit) (3-Methylcrotonyl-CoA carboxylase biotin-containi... [Strongylocentrotus purpuratus]
sw01391	993	1195	0.8855	718	691	1.2974	355	430	1.0723	68	1016	0.0887		gi|24580513|ref|NP_722590.1| CG31973-PB, isoform B [Drosophila melanogaster] CG31973-PB, isoform B [Drosophila melanogaster]
sw01395	1243	1241	0.9657	1131	1018	1.1865	701	1096	0.7119	117	642	0.2687		gi|72046311|ref|XP_792519.1| PREDICTED: similar to WD repeat domain 52, partial [Strongylocentrotus purpuratus]
sw01396	206	335		453	459	1.1514	122	212		93	224			gi|24648437|ref|NP_732524.1| CG5191-PE, isoform E [Drosophila melanogaster] CG5191-PC, isoform C [Drosophila melanogaster] CG5191-PE, isoform E [Drosophila melanogaster] CG5191-PC, isoform C [Drosophila melanogaster]
sw01397	666	894	0.8916	521	601	1.1375	346	567	0.6803	44	743	0.1353		gi|55239284|gb|EAA11417.2| ENSANGP00000009998 [Anopheles gambiae str. PEST] ENSANGP00000009998 [Anopheles gambiae str. PEST]
sw01399	1378	1713	0.7581	1051	1081	1.0496	1596	1584	1.014	1319	1173	1.2241		gi|9964507|ref|NP_064975.1| protein phosphatase 1, regulatory subunit 15A [Amsacta moorei entomopoxvirus] AMV193 [Amsacta moorei entomopoxvirus]
sw01400	173	281		388	465	1.0101	49	147		60	189			gi|60552280|gb|AAH91585.1| ADP-ribosylation factor-like 1 [Xenopus tropicalis] ADP-ribosylation factor-like 1 [Xenopus tropicalis] ADP-ribosylation factor-like 1 [Xenopus tropicalis]
sw01402	9757	6637	1.2674	14623	12710	1.0418	20998	9310	2.9307	2685	5523	0.4457		gi|15886861|emb|CAC85911.1| arginine kinase [Plodia interpunctella] Arginine kinase (AK) (Allergen Plo i 1)
sw01404	555	755	0.794	1385	955	1.4073	1529	1223	1.1439	113	341			gi|57909555|ref|XP_552620.1| ENSANGP00000028761 [Anopheles gambiae str. PEST] ENSANGP00000028761 [Anopheles gambiae str. PEST]
sw01405	2396	2448	0.9953	2228	1654	1.4554	2458	1164	2.0846	2497	2065	1.179		gi|76654987|ref|XP_879917.1| PREDICTED: similar to cyclin M2 isoform 2 isoform 9 [Bos taurus]
sw01406	1104	1089	1.1507	990	915	1.225	1444	1292	1.242	1422	901	1.7228		gi|76576153|gb|ABA53824.1| sterol carrier protein x [Bombyx mori]
sw01408	336	632	0.6189	312	403	0.9983	130	309		69	307			gi|27901658|gb|AAO26673.1| anion exchanger [Homo sapiens]
sw01413	87	188		99	371		54	209		1653	159	14.0011		gi|1103383|emb|CAA63802.1| alpha7 nicotinic acetylcholine receptor subunit [Bos taurus] cholinergic receptor, nicotinic, alpha 7 [Bos taurus] Neuronal acetylcholine receptor protein, alpha-7 subunit precursor
sw01414	1321	1716	0.8102	1615	1367	1.2261	1398	1294	1.1548	701	1330	0.6462		gi|77799294|dbj|BAE46742.1| MAP kinse-ERK kinase [Bombyx mori]
sw01417	285	463	0.8107	200	372		46	160		30	147			gi|72110099|ref|XP_795872.1| PREDICTED: similar to leucine rich repeat containing 49 [Strongylocentrotus purpuratus]
sw01418	2477	3183	0.7655	2863	1953	1.4171	974	1449	0.7287	198	1265	0.2137		gi|72159142|ref|XP_792217.1| PREDICTED: similar to ganglioside-induced differentiation-associated-protein 2 (predicted) [Strongylocentrotus purpuratus]
sw01421	402	408	1.2227	459	370	1.566	213	162		97	343
sw01422	1549	3227	0.5077	1167	2515	0.5213	641	1715	0.4112	1433	1251	1.3126
sw01423	382	377		423	524	0.9695	266	534	0.7074	207	284
sw01427	544	617	0.9485	403	406	1.2143	362	417	1.0964	142	431	0.5489		gi|55242794|gb|EAA07084.3| ENSANGP00000016038 [Anopheles gambiae str. PEST] ENSANGP00000016038 [Anopheles gambiae str. PEST]
sw01428	608	778	0.8208	871	679	1.2602	820	560	1.58	777	656	1.361
sw01429	752	728	1.121	1235	1280	1.0707	305	821	0.3663	46	649	0.145		gi|6164595|gb|AAF04457.1| lacunin [Manduca sexta]
sw01430	704	801	0.9967	489	532	1.101	250	361		297	398			gi|72159097|ref|XP_791699.1| PREDICTED: similar to zinc finger, DHHC domain containing 5 [Strongylocentrotus purpuratus]
sw01434	975	1227	0.8477	1075	1368	0.8522	615	864	0.824	600	782	1.0061		gi|72109055|ref|XP_780820.1| PREDICTED: similar to mitochondrial ribosomal protein L40 [Strongylocentrotus purpuratus]
sw01435	1093	974	1.1174	481	541	1.052	450	398	1.4125	390	538	1.0357
sw01437	55866	28988	1.2785	79219	17316	4.5947	57097	12469	6.2288	2893	57685	0.0402		gi|68989041|dbj|BAE06190.1| glycine rich protein [Bombyx mori]
sw01438	1290	1077	1.2761	1462	811	1.968	1256	394	4.4792	139	1147	0.1513		gi|54642703|gb|EAL31448.1| GA17082-PA [Drosophila pseudoobscura]
sw01440	545	509	1.188	330	438	0.8474	287	294		186	328
sw01441	410	475	1.1412	449	592	0.9265	327	373		230	369
sw01442	342	363		456	565	0.9804	389	422	1.1766	239	459	0.8439		gi|5453974|ref|NP_006247.1| protein kinase N2 [Homo sapiens] protein kinase N2 [Homo sapiens] protein kinase PRK2 [Homo sapiens] Protein kinase N2 (Protein kinase C-like 2) (Protein-kinase C-related kinase 2) PRK2 protein kinase C-related kinase:ISOTYPE=PRK2.3
sw01443	272	358		359	512	0.8627	195	477	0.5526	33	246			gi|24642004|ref|NP_572968.1| CG15890-PA [Drosophila melanogaster] CG15890-PA [Drosophila melanogaster]
sw01445	303	407	1.029	384	546	0.8814	167	363		61	343
sw01448	1724	2387	0.6802	2944	2348	1.1599	1258	1450	0.9028	769	1652	0.5283
sw01449	3717	3712	0.9848	4540	4515	0.9817	4107	3776	1.0611	4177	4107	0.9809		gi|4104638|gb|AAD02099.1| Rlip [Drosophila melanogaster]
sw01450	3847	3481	1.0533	3796	3550	1.0797	2942	3333	0.9967	3326	3881	0.9116		gi|4104638|gb|AAD02099.1| Rlip [Drosophila melanogaster]
sw01454	338	386		449	585	0.9248	275	447	0.8081	457	380	1.8251
sw01456	303	365		345	416	0.9977	71	188		122	183
sw01457	174	307		387	447	1.1685	65	174		75	153
sw01458	197	286		299	449	0.8917	63	225		14	191			gi|54639187|gb|EAL28589.1| GA18365-PA [Drosophila pseudoobscura]
sw01459	1057	693	1.5606	947	862	1.2201	422	365	1.7697	327	878	0.509
sw01460	278	430	0.7663	717	788	0.9258	290	434	0.9431	101	299			gi|85164|pir||A28449 tropomyosin, cytoskeletal - fruit fly (Drosophila melanogaster) tropomyosin II non-muscle isoform
sw01461	723	885	0.9905	900	1009	1.0333	389	412	1.1532	862	699	1.7472		gi|57506558|dbj|BAD86650.1| reverse transcriptase [Bombyx mori]
sw01464	184	284		396	451	0.9713	87	225		94	270			gi|68359949|ref|XP_695802.1| PREDICTED: similar to neuroligin 3 [Danio rerio]
sw01465	1766	2424	0.8218	2138	2060	1.169	1203	2278	0.5519	620	2027	0.3441
sw01466	1770	1647	1.1632	1787	1479	1.359	1203	936	1.4302	1971	1635	1.3921		gi|66522082|ref|XP_393336.2| PREDICTED: similar to GMP synthase [glutamine-hydrolyzing] (Glutamine amidotransferase) (GMP synthetase) [Apis mellifera]
sw01468	6392	4044	1.2912	9075	8800	0.8955	6184	6669	1.0772	7529	5299	1.2646		gi|27820078|gb|AAL68189.2| GH08937p [Drosophila melanogaster]
sw01470	260	364		504	674	0.9127	112	348		160	313
sw01471	4257	3452	1.0405	5550	4807	1.1266	3731	4844	0.9077	11370	2497	3.5241		gi|57164179|ref|NP_001009467.1| 6-phosphogluconate dehydrogenase (decarboxylating) [Ovis aries] 6-phosphogluconate dehydrogenase, decarboxylating 6-phosphogluconate dehydrogenase (decarboxylating) [Ovis aries]
sw01477	377	515	0.9608	363	550	0.8467	656	562	1.3891	461	414	1.6573		gi|854534|emb|CAA60962.1| oxidative stress resistance [Saccharomyces cerevisiae]
sw01478	1588	1652	1.0517	1315	1554	0.9387	926	1056	1.064	747	874	1.1897
sw01479	18990	14747	0.9837	22726	24339	0.8115	14355	20266	0.8674	17267	15910	0.8147		gi|4063389|gb|AAC98301.1| QM protein [Bombyx mandarina] 60S ribosomal protein L10 (QM protein homolog)
sw01480	325	395		419	502	0.9273	122	238		134	213			gi|448356|prf||1917151A fructose transporter GLUT5 fructose transporter
sw01486	611	1298	0.5407	731	1371	0.6077	273	1367	0.3033	10	1141	0.0321		gi|66499360|ref|XP_396507.2| PREDICTED: similar to CG11550-PA [Apis mellifera]
sw01489	967	1123	0.9525	1490	1439	1.0549	1163	1501	0.8267	168	319			gi|53148469|dbj|BAD52262.1| tetraspanin D107 [Plutella xylostella]
sw01490	294	382		341	485	0.8752	48	176		56	240
sw01491	1225	1492	0.7213	1404	1040	1.3575	578	907	0.7449	256	697	0.5225
sw01492	1893	1748	0.974	2627	2279	1.0353	2468	1798	1.4413	1742	1895	1.1489		gi|4262366|gb|AAD14595.1| alternatively spliced serine/threonine protein kinase MIG-15 [Caenorhabditis elegans]
sw01496	397	417	1.0823	446	454	1.0733	253	355		86	404	0.4247		gi|54644120|gb|EAL32862.1| GA21824-PA [Drosophila pseudoobscura]
sw01497	286	584	0.6511	361	513	0.8709	81	205		59	290			gi|72008675|ref|XP_786798.1| PREDICTED: similar to Solute carrier family 23, member 2 (Sodium-dependent vitamin C transporter 2) (mSVCT2) (Na(+)/L-ascorbic acid transporter 2) (Yolk sac permease-like molecule 2) [Strongylocentrotus purpuratus]
sw01498	343	406	1.0923	297	397		43	167		82	174			gi|27903492|gb|AAO24632.1| inhibitor of apoptosis protein-1 [Ictalurus punctatus] inhibitor of apoptosis protein 1 [Ictalurus punctatus]
sw01499	354	400	0.9976	245	311		78	205		134	261
sw01500	733	620	1.2066	818	728	1.1444	582	701	0.9556	610	613	1.4352		gi|704416|gb|AAB00499.1| elongation factor Tu
sw01501	389	489	0.9915	768	714	1.1533	147	296		227	330			gi|77455216|gb|ABA86417.1| CG9211 [Drosophila erecta]
sw01504	927	910	0.9854	500	816	0.6173	380	764	0.601	3838	1944	2.5828		gi|68396543|ref|XP_682831.1| PREDICTED: similar to trimethyllysine hydroxylase, epsilon [Danio rerio]
sw01507	665	861	0.7697	458	697	0.7101	549	888	0.7075	434	657	0.9261		gi|60650282|gb|AAX31373.1| Bcl-2 inhibitor of transcription [Bos taurus] Bcl-2 inhibitor of transcription [Bos taurus]
sw01508	728	708	1.0122	768	765	0.9634	432	468	1.0563	614	856	0.8835		gi|50730490|ref|XP_416929.1| PREDICTED: similar to Ran-binding protein 2 [Gallus gallus]
sw01509	483	685	0.8036	336	443	0.9536	113	217		105	264
sw01510	278	344		412	484	1.0076	28	164		50	152			gi|51980242|gb|AAU20793.1| S-adenosylhomocysteine hydrolase-like protein variant 2 [Danio rerio]
sw01513	3578	3710	0.9087	4416	3060	1.4104	2684	1672	1.6521	1391	2917	0.5629		gi|25012868|gb|AAN71522.1| RH09189p [Drosophila melanogaster]
sw01514	343	399		450	486	1.0902	40	149		46	208			gi|5902108|ref|NP_009015.1| SRY-box 21 [Homo sapiens] SRY (sex determining region Y)-box 21 [Homo sapiens] Transcription factor SOX-21 (SOX-A) DNA-binding protein SOX21 [Homo sapiens]
sw01517	349	398		311	438	0.8996	93	157		106	272			gi|68433011|ref|XP_700260.1| PREDICTED: similar to Dedicator of cytokinesis protein 6, partial [Danio rerio]
sw01519	423	472	0.9601	501	552	0.9997	124	423	0.4469	87	274
sw01520	442	531	0.8743	691	573	1.2132	234	291		168	331			gi|51258315|gb|AAH80017.1| RSK2 protein [Xenopus laevis] Rsk-2 [Xenopus laevis]
sw01523	300	316		321	397		1058	252	5.0295	74	164			gi|55235970|gb|EAA14478.2| ENSANGP00000014394 [Anopheles gambiae str. PEST] ENSANGP00000014394 [Anopheles gambiae str. PEST]
sw01524	280	357		509	501	1.0174	161	273		127	237			gi|73953589|ref|XP_546170.2| PREDICTED: similar to Adapter-related protein complex 3 mu 1 subunit (Mu-adaptin 3A) (AP-3 adapter complex mu3A subunit) [Canis familiaris]
sw01526	226	292		407	454	1.0312	12	157		34	148
sw01529	604	649	0.9726	506	475	1.2381	109	215		89	326
sw01530	166	266		355	403	1.0479	19	167		21	146			gi|2970687|gb|AAC06038.1| beta-glucosidase precursor [Spodoptera frugiperda]
sw01533	2191	2230	0.9033	2304	1905	1.2076	1829	1621	1.2106	1246	2325	0.6377		gi|87248139|gb|ABD36122.1| glycosyl-phosphatidyl-inositol-anchored protein [Bombyx mori]
sw01535	9944	7028	1.0339	9643	9233	0.9261	7602	9598	0.8526	6674	6581	0.9093		gi|66517317|ref|XP_625060.1| PREDICTED: similar to ATP synthase 1 [Apis mellifera]
sw01537	318	561	0.8045	240	419	1.0023	290	180		145	290			gi|10947014|ref|NP_067543.1| poly(rC) binding protein 3 [Mus musculus] alphaCP-3 [Mus musculus]
sw01541	516	484	1.3596	322	705	0.7497	514	346	1.8674	197	341			gi|55235200|gb|EAA14882.2| ENSANGP00000013880 [Anopheles gambiae str. PEST] ENSANGP00000013880 [Anopheles gambiae str. PEST]
sw01543	329	408	1.2054	306	427	1.2626	216	375		211	276			gi|66526357|ref|XP_397509.2| PREDICTED: hypothetical protein XP_397509 [Apis mellifera]
sw01547	220	332		352	547	1.0816	180	333		208	346
sw01548	74	297		201	539	0.6215	81	272		59	240			gi|1378128|gb|AAC47338.1| serpin 1
sw01551	4626	3306	1.3592	5253	4489	1.3535	5333	3932	1.2802	221	2851	0.122		gi|6448469|dbj|BAA86911.1| homologue of Sarcophaga 26,29kDa proteinase [Periplaneta americana]
sw01553	314	516	0.862	272	513	0.8598	319	411	0.8756	107	306
sw01557	7859	7381	0.9964	8221	11152	0.8339	8599	13013	0.7312	11344	10985	0.8585		gi|30176556|gb|EAA44481.1| ENSANGP00000022480 [Anopheles gambiae str. PEST] ENSANGP00000022480 [Anopheles gambiae str. PEST]
sw01560	8845	10845	0.7059	7671	9097	0.8555	10324	9512	1.1084	6374	9522	0.5775		gi|87248085|gb|ABD36095.1| chaperonin containing t-complex polypeptide 1 beta subunit [Bombyx mori]
sw01561	324	419	1.1272	278	453	1.0038	300	307		123	369
sw01563	2233	2405	1.0011	2256	2881	0.9098	2637	3874	0.705	3988	2451	1.6508		gi|87248373|gb|ABD36239.1| nonclathrin coat protein zeta 1-COP [Bombyx mori]
sw01566	257	419	0.9272	261	521	0.8028	246	309		183	376			gi|25777746|ref|NP_689808.2| piggyBac transposable element derived 4 [Homo sapiens]
sw01567	8893	7133	1.1702	8986	10712	0.8729	3627	9221	0.3987	521	10607	0.0661
sw01568	319	400	1.1517	308	402	1.1383	92	222		140	247			gi|76639110|ref|XP_595505.2| PREDICTED: similar to thyroid hormone receptor associated protein 2, partial [Bos taurus]
sw01570	370	582	0.8664	340	524	0.9455	164	278		192	350
sw01572	1018	1631	0.604	566	716	0.9537	1101	720	1.566	706	944	0.9318
sw01573	313	544	0.7666	397	422	1.3666	529	365	1.6291	650	688	1.0836
sw01574	8129	4989	1.5136	11165	7834	1.2561	12118	6836	1.7268	27363	2209	9.6345		gi|1362608|pir||A53909 gelsolin, secreted form precursor - fruit fly (Drosophila melanogaster) The biology of this fly protein has not yet been explored. Its identification as a secretory gelsolin is based on sequence comparison to the vertebrate gelsolins.; putative
sw01575	589	754	0.8958	519	414	1.6996	191	280		224	171			gi|7576710|gb|AAF63957.1| CALNUC [Spodoptera frugiperda]
sw01576	655	710	1.0585	524	552	1.2076	407	354	1.3127	193	320			gi|25012570|gb|AAN71385.1| RE38276p [Drosophila melanogaster]
sw01577	7814	7988	0.8777	6599	9370	0.7814	7936	10501	0.7193	10285	8957	0.7636		gi|20151765|gb|AAM11242.1| RE56495p [Drosophila melanogaster]
sw01579	779	905	0.9501	807	888	1.1076	540	884	0.7457	484	644	0.8904		gi|66520183|ref|XP_392696.2| PREDICTED: similar to carboxylesterase [Apis mellifera]
sw01581	341	549	0.8235	372	501	1.0764	555	940	0.5641	537	553	1.1604		gi|1517895|gb|AAB69750.1| cytochrome P450
sw01582	677	862	0.9596	719	949	0.958	1082	1295	0.9277	746	752	1.1882		gi|55715679|gb|AAH85890.1| Peptidylprolyl isomerase (cyclophilin)-like 2 (predicted) [Rattus norvegicus] peptidylprolyl isomerase (cyclophilin)-like 2 (predicted) [Rattus norvegicus]
sw01583	4274	4676	0.806	6475	6884	0.9692	8629	6761	1.2882	14607	3233	3.885		gi|87248415|gb|ABD36260.1| tetraspanin D107 [Bombyx mori]
sw01585	372	566	0.8662	352	1086	0.441	208	659	0.3674	81	293			No hits found
sw01586	354	450	1.0213	425	475	1.1502	382	396		204	355			gi|68441341|ref|XP_685942.1| PREDICTED: similar to Zinc finger protein 180 (HHZ168) [Danio rerio]
sw01587	7178	4319	1.3694	9232	5961	1.4239	5059	4291	1.1826	11813	5699	2.0293		gi|17862342|gb|AAL39648.1| LD22648p [Drosophila melanogaster]
sw01588	446	509	1.0157	221	255		180	180		332	171			gi|51972260|ref|NP_001004343.1| microtubule-associated protein 1 light chain 3 gamma [Homo sapiens] MAP1 light chain 3-like protein 2 [Homo sapiens] novel protein [Homo sapiens] Microtubule-associated proteins 1A/1B light chain 3C precursor (MAP1A/MAP1B LC3 C) (MAP1A/1B light chain 3 C) (MAP1 light chain 3-like protein 3) (Autophagy-related protein LC3 C) (Autophagy-related ubiquitin-like modifie…
sw01589	4500	3843	1.1275	4336	3495	1.2686	4074	3970	0.9757	361	3652	0.139		gi|14041184|emb|CAC38758.1| mucus-like protein [Geodia cydonium]
sw01590	299	429	0.9215	147	299		47	170		23	120			gi|84095052|dbj|BAE66716.1| carboxylesterase [Aphis gossypii]
sw01592	1226	518	2.5165	295	340		294	236		99	222
sw01593	331	479	0.9389	436	675	0.866	665	705	0.9906	225	325			gi|5081628|gb|AAD39473.1| origin recognition complex subunit 4 [Drosophila melanogaster]
sw01594	318	439	0.95	132	336		105	235		66	193			gi|72007725|ref|XP_780055.1| PREDICTED: similar to carbonyl reductase 1 [Strongylocentrotus purpuratus]
sw01595	411	440	1.0756	442	572	0.9773	507	505	1.1977	1446	288	5.6999
sw01596	297	461	0.7925	285	447	0.8355	65	270		92	181			gi|74001569|ref|XP_544931.2| PREDICTED: similar to RNA-specific adenosine deaminase B1 isoform DRADA2a [Canis familiaris]
sw01600	13035	6771	1.5052	19703	10355	1.4056	12007	15236	0.7242	706	9542	0.0545
sw01606	342	425	1.0398	187	335		54	224		82	186
sw01609	7252	5520	1.102	9587	8284	1.0982	8754	9835	0.8885	4514	7241	0.5493		gi|6560635|gb|AAF16695.1| thioredoxin-like protein [Manduca sexta]
sw01610	365	419	1.1145	317	455	0.9463	101	211		240	324			gi|3688609|dbj|BAA33466.1| Fly Fas-associated factor (FFAF) [Drosophila melanogaster]
sw01617	743	862	0.9293	968	1073	1.0305	666	800	0.8596	1718	534	3.4592		gi|1663690|dbj|BAA08704.1| DNA supercoiling factor [Bombyx mori]
sw01618	1000	814	1.3655	629	819	0.8684	227	244		366	393			gi|65301139|ref|NP_006036.1| ATPase, Class II, type 9A [Homo sapiens] ATPase, Class II, type 9A [Homo sapiens] ATPase, Class II, type 9A [Homo sapiens] ATPase, Class II, type 9A [Homo sapiens] Probable phospholipid-transporting ATPase IIA (ATPase class II type 9A) (ATPase IIA)
sw01619	413	493	0.9419	310	407	0.9977	50	184		72	254			gi|6690782|gb|AAF24340.1| Short stop/Kakapo isoform C [Drosophila melanogaster]
sw01621	178	287		357	478	1.0178	234	381		283	382			gi|85857460|gb|ABC86266.1| RE45749p [Drosophila melanogaster]
sw01622	290	416	0.9104	321	383		41	172		67	218
sw01623	367	453	0.9249	237	313		57	216		59	183
sw01626	234	494	0.6162	345	568	0.7483	387	556	0.8324	235	510	0.6831		gi|54038705|gb|AAH84415.1| LOC495188 protein [Xenopus laevis]
sw01627	478	441	1.2393	346	354		96	171		94	197			gi|27802782|emb|CAD60843.1| novel protein with three zinc finger domains [Danio rerio] zinc finger protein 511 [Danio rerio]
sw01628	2320	2251	0.9487	3056	2304	1.2159	2441	1624	1.567	2652	1913	1.3075		gi|54638242|gb|EAL27644.1| GA11581-PA [Drosophila pseudoobscura]
sw01630	1211	1204	1.0629	1167	1202	1.0544	638	847	0.8769	90	657	0.2092		gi|4530064|gb|AAD21841.1| trypsin-like serine protease [Ctenocephalides felis]
sw01633	255	485	0.7284	482	692	0.8426	198	288		82	186			gi|62204242|gb|AAH92669.1| WD repeat and FYVE domain containing 2 [Danio rerio]
sw01634	293	389		459	449	1.2995	104	214		97	228			gi|89057622|ref|XP_942705.1| PREDICTED: similar to Zinc finger protein 208 [Homo sapiens]
sw01635	550	569	1.1014	402	426	1.214	586	420	1.772	161	303			gi|12230782|sp|Q9W7F2|WDR1_XENLA WD-repeat protein 1 (Actin-interacting protein 1) (XAIP1) actin interacting protein 1 [Xenopus laevis]
sw01636	2844	1816	1.4274	2999	2884	0.9534	2618	1509	2.0442	1557	1737	0.9295		gi|1125764|gb|AAA83588.1| Uncoordinated protein 78, isoform a [Caenorhabditis elegans] UNCoordinated family member (unc-78) [Caenorhabditis elegans] UNC-78 [Caenorhabditis elegans] Actin-interacting protein 1 (AIP1) (Uncoordinated protein 78) Chain A, Crystal Structure Of The Actin Interacting Protein From Caenorhabditis Elegans Chain A, Two Seven-Bladed Beta-Propeller Domains Revealed By The Str…
sw01641	209	365		446	467	1.1877	61	131		71	153
sw01642	580	613	1.1061	979	963	1.152	478	609	0.971	225	416	0.8931		gi|50749218|ref|XP_421538.1| PREDICTED: similar to nuclear receptor binding factor 2; nuclear receptor binding factor-2; comodulator of PPAR and RXR [Gallus gallus]
sw01643	4345	4085	0.9848	3587	3664	0.9618	2603	1716	1.8058	2539	2712	1.0119
sw01644	290	390		327	418	0.9457	167	235		253	321
sw01645	2569	3275	0.7915	4345	3362	1.2749	7925	2488	3.4633	613	2106	0.3111		gi|55243548|gb|EAA06469.2| ENSANGP00000012390 [Anopheles gambiae str. PEST] ENSANGP00000012390 [Anopheles gambiae str. PEST]
sw01646	615	647	1.1011	525	601	1.0537	255	352		299	449	1.0484		gi|50750481|ref|XP_422014.1| PREDICTED: similar to glycoprotein receptor gp330/megalin precursor [Gallus gallus]
sw01649	1800	2133	0.9547	2886	3253	0.9469	4166	4273	1.0667	8822	1342	8.1022		gi|66517091|ref|XP_397364.2| PREDICTED: similar to ENSANGP00000027134 [Apis mellifera]
sw01650	1244	1665	0.8037	968	1179	0.9411	1023	657	1.7125	455	1912	0.3001		gi|74136401|ref|NP_001028098.1| ATP2B4 protein [Macaca mulatta] ATP2B4 [Macaca mulatta]
sw01651	385	437	1.0562	550	551	1.1703	74	214		50	121
sw01652	281	395		374	453	0.9179	55	194		79	198			gi|27819990|gb|AAL39583.2| LD14917p [Drosophila melanogaster]
sw01653	1446	1631	1.0229	1838	1940	1.0587	1973	1586	1.3412	2744	1386	2.403		gi|45383926|ref|NP_990540.1| solute carrier family 2 (facilitated glucose transporter), member 1 [Gallus gallus] Solute carrier family 2, facilitated glucose transporter member 1 (Glucose transporter type 1) (GT1) glucose transporter protein
sw01658	256	325		538	500	1.3511	1218	204	5.7497	147	247			No hits found
sw01659	425	524	0.9465	484	611	0.9207	86	194		134	219
sw01664	253	347		275	296		193	421	0.7779	157	384			gi|55243854|gb|EAA05957.2| ENSANGP00000015944 [Anopheles gambiae str. PEST] ENSANGP00000015944 [Anopheles gambiae str. PEST]
sw01666	215	317		388	442	1.188	157	334		66	230
sw01668	2303	2659	0.7836	2519	1412	1.7745	3681	885	4.0313	3841	1145	5.195
sw01669	515	501	1.288	512	445	1.4954	166	199		168	386			gi|4218167|emb|CAA10724.1| myosin heavy chain [Drosophila melanogaster]
sw01670	187	323		418	468	1.1916	70	203		43	186			gi|881344|gb|AAC46610.1| nervous system antigen 2 nervana 2.2 antigen
sw01672	2964	2420	1.0805	2842	2517	1.0291	4332	3255	1.4179	483	3187	0.14
sw01675	493	629	0.8723	542	552	1.1207	166	379		205	358			gi|87248119|gb|ABD36112.1| elongation protein 4-like protein [Bombyx mori]
sw01677	590	736	0.9598	454	671	0.8264	222	501	0.5762	360	582	0.9683		gi|47225269|emb|CAG09769.1| unnamed protein product [Tetraodon nigroviridis]
sw01680	333	456	0.8317	339	376		79	327		110	234			gi|58394263|ref|XP_320626.2| ENSANGP00000021203 [Anopheles gambiae str. PEST] ENSANGP00000021203 [Anopheles gambiae str. PEST]
sw01682	257	419	0.8143	229	313		23	160		31	267			gi|67465874|ref|XP_649095.1| Ser/Thr protein phosphatase [Entamoeba histolytica HM-1:IMSS] Ser/Thr protein phosphatase, putative [Entamoeba histolytica HM-1:IMSS]
sw01686	257	370		335	459	0.9184	77	198		68	189
sw01687	304	456	0.7293	412	394	1.2568	73	171		55	250			gi|48101366|ref|XP_392669.1| PREDICTED: similar to venom protease precursor [Apis mellifera]
sw01690	186	310		427	445	1.1919	46	157		46	198
sw01691	301	420	0.8019	287	394		74	220		129	210
sw01694	230	286		447	431	1.2922	41	163		20	137
sw01695	162	206		272	434	0.8013	54	184		24	189
sw01696	263	435	0.7047	559	516	1.1452	19	185		47	194
sw01697	362	425	1.0209	286	379		66	218		21	155			gi|45550616|ref|NP_648696.2| nanchung CG5842-PA [Drosophila melanogaster] TRP channel protein nanchung [Drosophila melanogaster] CG5842-PA [Drosophila melanogaster]
sw01698	656	840	0.8797	789	771	1.1344	313	374		173	508	0.4483		gi|47551195|ref|NP_999778.1| homeodomain protein [Strongylocentrotus purpuratus] SpMsx [Strongylocentrotus purpuratus]
sw01700	369	388		283	416	0.7303	205	359		188	279			gi|27371113|gb|AAH41501.1| Pdcd10-prov protein [Xenopus laevis] Programmed cell death protein 10
sw01702	240	316		434	493	1.038	67	231		82	144			gi|89287762|gb|EAR85750.1| hypothetical protein TTHERM_00312320 [Tetrahymena thermophila SB210]
sw01703	406	455	0.9648	337	379		70	164		97	250			gi|66510096|ref|XP_395925.2| PREDICTED: similar to Flightless-I protein [Apis mellifera]
sw01704	470	512	0.9622	563	494	1.1745	217	189		89	274			gi|3004660|gb|AAC28407.1| flightless [Drosophila melanogaster] flightless I gene
sw01706	229	316		362	401	1.1136	63	205		69	160
sw01709	399	479	0.9833	445	565	0.9458	298	556	0.6815	136	341			gi|5815357|gb|AAD52652.1| J domain containing protein [Bombyx mori] J domain containing protein
sw01712	784	649	1.1879	1752	1078	1.5351	2172	471	5.0262	4051	670	6.8642		gi|71060087|emb|CAJ18587.1| Inhba [Mus musculus]
sw01714	2216	2130	1.072	3004	2309	1.2219	1260	1155	1.1491	667	1640	0.5206
sw01718	4038	3892	1.0187	4236	4339	0.912	3296	3391	1.025	4062	6732	0.6249		gi|89267380|emb|CAJ83060.1| RAN binding protein 5 [Xenopus tropicalis]
sw01720	497	511	0.9613	636	533	1.1477	1177	805	1.6023	1725	468	4.4668		gi|87248539|gb|ABD36322.1| Mo-molybdopterin cofactor sulfurase [Bombyx mori]
sw01722	269	335		434	436	1.1317	74	223		61	174
sw01724	353	355		512	490	1.046	41	207		89	206			gi|76634194|ref|XP_591561.2| PREDICTED: similar to zinc finger protein 91 [Bos taurus]
sw01725	755	814	0.9473	928	1082	0.9262	785	1015	0.9096	2293	656	3.3698		gi|25246706|gb|AAN72834.1| allantoinase [Ctenocephalides felis]
sw01726	1204	1606	0.8242	1056	872	1.2383	1166	991	1.2502	22	897	0.0567		gi|54637592|gb|EAL26994.1| GA18806-PA [Drosophila pseudoobscura]
sw01727	877	821	0.993	1042	921	1.146	352	495	0.8817	941	402	3.0869
sw01728	561	512	1.0869	736	565	1.225	124	195		240	312
sw01729	287	444	0.9395	493	658	1.1072	605	560	1.2571	1121	238	6.3247
sw01731	6058	6571	0.8498	4596	6907	0.7632	5790	6259	0.8961	4830	5864	0.646		gi|89272898|emb|CAJ83205.1| novel protein similar to GTP-binding protein PTD004 [Xenopus tropicalis]
sw01732	6085	5157	1.123	6134	6855	0.9748	5458	5634	0.9613	5215	5588	0.7932		gi|55243004|gb|EAA06828.2| ENSANGP00000019083 [Anopheles gambiae str. PEST] ENSANGP00000019083 [Anopheles gambiae str. PEST]
sw01736	351	533	0.9362	287	583	0.7616	152	266		150	354
sw01737	170	281		248	403	1.0651	129	214		130	215
sw01744	429	778	0.7202	299	695	0.645	500	755	0.6675	261	567	0.7228		gi|27819915|gb|AAL39757.2| LD37349p [Drosophila melanogaster]
sw01746	138	269		89	319		41	203		535	208	4.2509		gi|54639602|gb|EAL29004.1| GA11275-PA [Drosophila pseudoobscura]
sw01748	405	557	0.9801	403	607	0.881	485	479	1.1181	386	424	1.2134		gi|50737115|ref|XP_419158.1| PREDICTED: similar to retinoblastoma binding protein 8 isoform a; CTBP-interacting protein; retinoblastoma-interacting myosin-like; retinoblastoma-binding protein 8 [Gallus gallus]
sw01749	220	312		196	422	0.835	159	292		34	238			gi|87248523|gb|ABD36314.1| Lix1 protein [Bombyx mori]
sw01752	367	467	1.0952	260	451	0.8434	64	221		97	223			gi|56718386|gb|AAS93900.1| glycogen synthase [Crassostrea gigas]
sw01753	595	722	1.0635	480	767	0.8861	784	994	0.7844	396	429	1.3745		gi|11386961|sp|O18638|OAF_DROVI Out at first protein out at first [Drosophila virilis]
sw01755	1712	1761	1.0824	1580	2066	0.9171	2545	1872	1.4412	1983	2212	0.9895		gi|28380956|gb|AAO41445.1| RE29053p [Drosophila melanogaster]
sw01756	550	863	0.7832	419	681	0.7935	509	717	0.7543	72	510	0.2577		gi|55644199|ref|XP_511091.1| PREDICTED: tyrosine aminotransferase [Pan troglodytes]
sw01757	429	525	1.1302	503	594	1.209	548	633	0.8925	406	527	1.1122		gi|58395869|ref|XP_321557.2| ENSANGP00000011634 [Anopheles gambiae str. PEST] ENSANGP00000011634 [Anopheles gambiae str. PEST]
sw01759	426	656	0.8708	519	578	1.2273	748	864	0.9718	580	424	1.6953		gi|76610541|ref|XP_882596.1| PREDICTED: similar to GDP-mannose pyrophosphorylase A isoform 6 [Bos taurus]
sw01764	725	848	0.9427	459	618	0.9204	413	390	1.1867	311	341			gi|11870000|gb|AAG40582.1| nuclear matrix transcription factor [Rattus norvegicus] Zinc finger protein 384 (Nuclear matrix transcription factor 4) (Cas-associated zinc finger protein)
sw01766	1017	1305	0.8913	842	1449	0.7292	1288	1353	1.0544	1016	1407	0.8218		gi|68444865|ref|XP_700757.1| PREDICTED: wu:fi31d10 [Danio rerio]
sw01768	395	487	1.0053	341	412	1.1282	112	211		80	186			gi|76635414|ref|XP_613593.2| PREDICTED: similar to pleckstrin homology-like domain, family B, member 1 isoform 1 [Bos taurus]
sw01769	234	400	0.8604	278	486	0.8779	154	297		108	252
sw01772	604	641	1.1062	390	656	0.7247	266	461	0.6483	423	594	0.9363		gi|55237266|gb|EAA12840.2| ENSANGP00000019242 [Anopheles gambiae str. PEST] ENSANGP00000019242 [Anopheles gambiae str. PEST]
sw01773	257	366		231	437	0.8575	113	253		213	343			gi|52421205|dbj|BAD51473.1| gloverin-like protein 1 [Bombyx mori]
sw01775	593	788	0.8608	14	175		21	201		23	115			gi|57966866|ref|XP_562320.1| ENSANGP00000027535 [Anopheles gambiae str. PEST] ENSANGP00000027535 [Anopheles gambiae str. PEST]
sw01776	243	366		340	442	1.0291	54	166		47	142			gi|72012333|ref|XP_786641.1| PREDICTED: similar to WD-repeat protein 13 [Strongylocentrotus purpuratus]
sw01784	380	477	0.9498	308	365		57	200		95	223
sw01786	349	440	1.0324	310	359		133	207		226	310			gi|67987562|gb|EAM75355.1| ATP-binding region, ATPase-like:Histidine kinase, HAMP region [Kineococcus radiotolerans SRS30216] ATP-binding region, ATPase-like:Histidine kinase, HAMP region [Kineococcus radiotolerans SRS30216]
sw01787	380	437	1.0076	233	325		137	262		59	164			gi|68399208|ref|XP_696575.1| PREDICTED: similar to epidermal growth factor receptor pathway substrate 15-like 1 [Danio rerio]
sw01790	374	488	0.9876	270	277		1141	281	6.413	539	217	3.5754		gi|76559858|dbj|BAE45332.1| ecdysone 20-hydroxylase [Bombyx mori]
sw01791	531	585	0.9906	473	656	0.8965	1444	1113	1.2783	2006	448	4.8843		gi|346619|pir||JC1318 triacylglycerol lipase (EC 3.1.1.3) precursor, pancreatic - rabbit
sw01792	411	424	1.164	282	341		96	182		120	204			gi|50748398|ref|XP_421227.1| PREDICTED: similar to SI:dZ142B24.4 (novel protein with HECT-domain (ubiquitin-transferase)) [Gallus gallus]
sw01793	354	451	0.9948	493	475	1.2864	280	276		315	395			gi|134497|sp|P29304|SINA_DROVI Ubiquitin ligase sina (Seven in absentia protein) SEVEN IN ABSTENTIA
sw01796	597	506	1.263	506	626	0.877	362	448	0.9622	385	423	1.3282		No hits found
sw01800	362	524	0.7934	591	697	0.8942	238	424	0.7037	1198	289	6.5495		gi|57747|emb|CAA29656.1| serine pyruvate aminotransferase precursor (AA -22 to 392) [Rattus rattus] serine-pyruvate transaminase (EC 2.6.1.51) precursor, mitochondrial - rat Serine--pyruvate aminotransferase, mitochondrial precursor (SPT) (Alanine--glyoxylate aminotransferase) (AGT)
sw01802	358	552	0.8298	329	458	0.9686	193	365		104	269
sw01803	496	562	0.9109	336	460	0.9206	186	425	0.6891	190	330			gi|68362476|ref|XP_686268.1| PREDICTED: similar to Von Hippel-Lindau disease tumor suppressor (pVHL) (G7 protein) [Danio rerio]
sw01806	752	911	0.9147	706	710	1.1544	246	313		254	442	0.8796		gi|7446401|pir||JC5494 protein-tyrosine kinase (EC 2.7.1.112) - rat
sw01808	262	465	0.6862	260	308		46	212		86	212			gi|55243722|gb|EAA06218.2| ENSANGP00000019924 [Anopheles gambiae str. PEST] ENSANGP00000019924 [Anopheles gambiae str. PEST]
sw01809	383	414	1.1185	491	468	1.4123	190	208		190	288
sw01811	7101	4143	1.415	10958	6737	1.2932	8058	5391	1.8012	18839	1186	16.6192
sw01814	761	964	0.8749	597	682	1.0066	387	379		805	707	1.5259		gi|4191598|gb|AAD09820.1| sarco(endo)plasmic reticulum-type calcium ATPase [Heliothis virescens]
sw01815	302	347		557	522	1.2197	43	209		101	205			gi|50758110|ref|XP_415765.1| PREDICTED: similar to malate dehydrogenase, mitochondrial; malate dehydrogenase 2; Malate dehydrogenase 2 NAD (mitochondrial) [Gallus gallus]
sw01816	1330	911	1.4869	1347	924	1.3764	886	533	1.7939	1377	924	1.5613		gi|66803112|ref|XP_635399.1| hypothetical protein DDB0189237 [Dictyostelium discoideum] hypothetical protein DDB0189237 [Dictyostelium discoideum]
sw01817	588	647	1.019	614	607	1.2814	133	190		183	331
sw01819	3766	3432	0.9213	4317	4723	0.8385	2986	3767	0.8736	3935	4428	0.8852		gi|73986746|ref|XP_533895.2| PREDICTED: similar to DEAD (Asp-Glu-Ala-Asp) box polypeptide 39 isoform 1 [Canis familiaris]
sw01821	391	444	1.0564	468	535	1.149	112	225		161	238			gi|12698368|gb|AAK01488.1| metabotropic glutamate receptor 5 splice variant f [Gallus gallus] glutamate receptor, metabotropic 5 [Gallus gallus]
sw01822	308	387		636	576	1.2811	90	164		115	228			gi|13529185|gb|AAH05359.1| GMFB protein [Homo sapiens] glia maturation factor, beta [Homo sapiens] glia maturation factor beta [synthetic construct]
sw01824	329	497	0.7608	741	763	0.9729	222	289		452	346	1.7548		gi|72043165|ref|XP_786655.1| PREDICTED: similar to kidney predominant protein NCU-G1 [Strongylocentrotus purpuratus]
sw01825	372	344		412	563	0.9075	282	409	0.8526	441	425	1.5194		gi|66553058|ref|XP_623865.1| PREDICTED: similar to Syntaxin 18 (predicted) [Apis mellifera]
sw01826	318	412	0.9789	466	713	0.7583	431	746	0.7129	283	532	0.8374		gi|49522446|gb|AAH75487.1| MGC89325 protein [Xenopus tropicalis] MGC89325 protein [Xenopus tropicalis]
sw01827	302	420	0.87	357	400	1.1749	52	190		64	179			gi|61676223|gb|AAX51689.1| GABA-B receptor R2 subunit [Rana catesbeiana]
sw01828	355	469	0.8889	636	623	1.1108	72	200		134	260
sw01829	388	459	1.1279	613	647	1.1276	294	273		216	412	0.7793
sw01830	595	990	0.6798	845	1031	0.9102	533	652	1.0028	314	840	0.5726		gi|12653443|gb|AAH00493.1| Developmentally regulated GTP binding protein 2 [Homo sapiens] developmentally regulated GTP binding protein 2 [Homo sapiens] developmentally regulated GTP binding protein 2 [synthetic construct]
sw01831	398	478	0.9819	600	633	1.0937	71	278		52	183			No hits found
sw01832	4921	4806	0.8752	8660	5272	1.4194	3652	3041	1.3112	2456	3966	0.5936		gi|28261391|gb|AAO32817.1| ADP/ATP translocase [Bombyx mori]
sw01834	234	365		361	481	0.9375	53	188		26	204			gi|122011|sp|P02270|H2A_SIPNU Histone H2A
sw01835	430	528	0.9403	560	576	1.1482	65	152		169	192			gi|663070|emb|CAA54829.1| histone H4 [Pyrenomonas salina] Histone H4
sw01836	7233	6894	0.8672	10867	8977	1.0144	9598	7343	1.4517	2839	7127	0.3702		gi|76632784|ref|XP_877782.1| PREDICTED: similar to isocitrate dehydrogenase 3 (NAD+) beta isoform 7 [Bos taurus] PREDICTED: similar to isocitrate dehydrogenase 3 (NAD+) beta isoform 2 [Bos taurus] NAD(+)-isocitrate dehydrogenase subunit 1 IDH1-B precursor [Bos taurus] Isocitrate dehydrogenase [NAD] subunit beta, mitochondrial precursor (Isocitric dehydrogenase) (NAD(+)-specific ICDH) (NAD(+)-isoc…
sw01837	244	333		376	463	1.0377	38	126		68	167
sw01838	295	409	0.921	459	499	1.1468	121	231		179	213
sw01839	467	521	1.0385	753	793	1.0479	217	348		199	272
sw01840	1622	1651	0.9369	2502	2088	1.1216	1386	1545	0.936	1153	1237	1.0278		gi|72006573|ref|XP_782273.1| PREDICTED: similar to Antigen KI-67 [Strongylocentrotus purpuratus]
sw01842	335	365		520	579	1.1113	117	266		105	286
sw01843	331	356		574	661	0.9962	220	370		127	177			gi|72084516|ref|XP_787754.1| PREDICTED: similar to autophagy-related 12-like [Strongylocentrotus purpuratus]
sw01844	260	389		456	428	1.1817	48	176		97	223
sw01846	871	1029	0.9592	1266	1191	1.2173	1086	974	1.2643	137	698	0.3252		gi|50749014|ref|XP_426446.1| PREDICTED: similar to hypohtetical protein [Gallus gallus]
sw01848	290	407	0.8466	573	521	1.171	47	185		121	236
sw01850	244	383		423	454	1.2029	151	239		68	294			No hits found
sw01851	1779	1589	1.0342	2656	2977	0.8927	2047	1098	2.4895	8202	1653	4.0487		gi|83595225|gb|ABC25066.1| C-type lysozyme [Glossina morsitans morsitans]
sw01854	202	351		377	424	1.1716	49	153		41	175			gi|30179022|gb|EAA03645.2| ENSANGP00000004035 [Anopheles gambiae str. PEST] ENSANGP00000004035 [Anopheles gambiae str. PEST]
sw01855	362	431	1.0161	464	596	0.9083	70	205		27	169
sw01856	302	298		460	464	1.0837	78	257		77	230			gi|58698875|ref|ZP_00373744.1| SD27140p [Wolbachia endosymbiont of Drosophila ananassae] SD27140p [Wolbachia endosymbiont of Drosophila ananassae]
sw01860	183	287		420	541	0.8489	93	237		102	268			gi|27374318|gb|AAO01065.1| endoA-PA [Drosophila willistoni]
sw01862	214	320		372	444	1.1378	79	205		71	180			gi|48098777|ref|XP_392558.1| PREDICTED: similar to YTH domain containing 2 [Apis mellifera]
sw01863	311	381		456	436	1.2447	49	199		44	153			gi|24647180|ref|NP_650471.1| CG14871-PA [Drosophila melanogaster] CG14871-PA [Drosophila melanogaster]
sw01864	699	824	0.8733	1119	962	1.1774	125	358		129	583	0.3209
sw01866	305	380		480	562	1.0993	102	171		87	216
sw01867	514	618	0.9236	722	765	1.0352	147	320		103	287
sw01868	502	509	1.0622	520	541	1.0546	99	205		190	412	0.7609
sw01869	316	466	0.9176	403	402	1.3508	95	218		58	168			gi|66522963|ref|XP_623873.1| PREDICTED: similar to ENSANGP00000011372 [Apis mellifera]
sw01870	234	389		495	491	1.3224	136	193		41	357			gi|9623333|gb|AAF90120.1| stretchin-MLCK [Drosophila melanogaster]
sw01871	269	359		380	401	1.1514	72	283		37	155			gi|24660176|ref|NP_648130.2| CG8539-PA [Drosophila melanogaster] CG8539-PA [Drosophila melanogaster]
sw01872	1858	1374	1.2515	2977	1713	1.694	3026	1277	2.4066	5680	925	10.5647		gi|6448469|dbj|BAA86911.1| homologue of Sarcophaga 26,29kDa proteinase [Periplaneta americana]
sw01874	281	355		401	395	1.2977	81	192		80	208			gi|72090241|ref|XP_790495.1| PREDICTED: similar to cytoskeleton associated protein 5, partial [Strongylocentrotus purpuratus]
sw01876	206	266		400	355	1.3038	15	181		55	214
sw01877	440	539	1.0001	471	502	1.0885	418	386	1.2132	409	388	1.5465		gi|54641833|gb|EAL30583.1| GA18565-PA [Drosophila pseudoobscura]
sw01878	983	1273	0.8701	1089	1194	0.9638	812	728	1.1782	568	997	0.73		gi|68439801|ref|XP_696863.1| PREDICTED: similar to Zinc finger SWIM domain containing protein 5 [Danio rerio]
sw01880	361	329		450	475	1.0272	135	212		150	333			gi|17137574|ref|NP_477376.1| CG4585-PA [Drosophila melanogaster] GH20310p [Drosophila melanogaster] CG4585-PA [Drosophila melanogaster] unnamed protein product [Drosophila melanogaster] corresponding to CK00282 cDNA from BDGP EST library~undefined protein 2 [Drosophila melanogaster]
sw01882	1585	1963	0.8706	1923	1290	1.5667	1677	1352	1.2621	1104	1666	0.743		gi|27924430|gb|AAH45025.1| Ywhae-prov protein [Xenopus laevis] 14-3-3 protein epsilon [Xenopus laevis]
sw01883	2579	2714	0.7893	3106	3188	0.9282	2418	3525	0.776	5069	1956	2.6223		gi|87248099|gb|ABD36102.1| Der1-like domain family member 1 [Bombyx mori]
sw01884	659	721	0.9153	1067	884	1.2068	372	388		444	473	1.3837		gi|14010837|ref|NP_114187.1| NSFL1 (p97) cofactor (p47) [Rattus norvegicus] p47 [Rattus norvegicus] NSFL1 (p97) cofactor (p47) [Rattus norvegicus] XY40 protein [Rattus norvegicus] NSFL1 cofactor p47 (p97 cofactor p47) (XY body-associated protein XY40)
sw01887	321	295		292	418	0.8859	178	270		202	349
sw01888	319	459	0.7895	592	513	1.2195	470	1013	0.5362	127	255			gi|6572555|gb|AAF17311.1| BARBU [Drosophila melanogaster]
sw01890	162	262		253	458	0.683	205	362		171	212			gi|55628412|ref|XP_519039.1| PREDICTED: similar to hypothetical protein FLJ22313 [Pan troglodytes]
sw01891	410	457	0.9677	456	509	1.0015	125	112		52	245
sw01892	249	311		393	401	1.0537	39	164		103	168
sw01894	236	302		420	438	1.1542	41	157		38	133
sw01897	336	410	0.9941	168	254		57	218		50	169
sw01898	491	545	1.039	482	634	0.8629	233	361		217	294
sw01900	7245	5483	0.9924	10229	7790	1.0886	5063	4217	1.2927	7962	5346	1.1063		gi|46358051|dbj|BAD15163.1| heat shock protein [Antheraea yamamai]
sw01903	2867	2672	0.9132	2543	3539	0.6753	2640	3584	0.8018	2966	2395	1.2298		gi|87248405|gb|ABD36255.1| suppressor of Lec15 glycosylation mutation-like protein [Bombyx mori]
sw01905	8666	6405	1.0739	8587	8636	0.9286	7227	6635	1.1222	5474	5220	1.0043
sw01906	1653	2284	0.7735	1790	2529	0.6967	1691	2103	0.8372	785	1678	0.5901		gi|55588600|ref|XP_513934.1| PREDICTED: similar to prefoldin 2 [Pan troglodytes] Prefoldin subunit 2 [Homo sapiens] Prefoldin subunit 2 [Homo sapiens] prefoldin 2 [Homo sapiens] prefoldin subunit 2 [Homo sapiens] prefoldin 2 [synthetic construct] prefoldin subunit 2 [Homo sapiens] Prefoldin subunit 2
sw01907	1637	2117	0.6832	1417	1118	1.2747	598	1209	0.5704	145	948	0.1932
sw01911	435	467	0.9534	504	460	1.1778	99	190		76	243
sw01913	531	870	0.6419	445	975	0.5351	495	924	0.6753	474	912	0.7159		gi|8855|emb|CAA30332.1| unnamed protein product [Drosophila melanogaster]
sw01914	667	824	0.9452	1342	1023	1.3023	413	379	1.2919	248	515	0.7684		No hits found
sw01915	316	342		567	460	1.3252	65	193		116	192
sw01916	2172	2222	0.7976	2616	2018	1.1092	1723	1602	1.1509	440	1412	0.3987		gi|55241300|gb|EAA08510.2| ENSANGP00000011712 [Anopheles gambiae str. PEST] ENSANGP00000011712 [Anopheles gambiae str. PEST]
sw01918	197	273		419	336	1.4535	45	175		76	168
sw01919	446	442	1.0329	481	504	1.0099	289	317		297	332			gi|87248073|gb|ABD36089.1| glutathione peroxidase [Bombyx mori]
sw01926	1152	1722	0.7865	1381	1644	1.1045	1267	1288	0.9946	643	1016	0.7707		gi|68424885|ref|XP_695039.1| PREDICTED: similar to c-Maf-inducing protein C-mip isoform, partial [Danio rerio]
sw01929	1306	1285	1.1368	1391	1691	1.0269	1408	2083	0.6583	1007	1358	0.9191		gi|48094452|ref|XP_392127.1| PREDICTED: similar to Dynactin subunit 6 (Dynactin subunit p27) (WS-3 protein) [Apis mellifera]
sw01934	395	568	0.9606	310	661	0.7449	276	363		97	533	0.3263		gi|24580731|ref|NP_722663.1| arouser CG4276-PA, isoform A [Drosophila melanogaster] CG4276-PA, isoform A [Drosophila melanogaster]
sw01936	612	681	1.1901	656	837	1.0843	655	633	1.0718	736	692	1.2803		gi|76651775|ref|XP_870010.1| PREDICTED: similar to THO complex subunit 1 (Tho1) (Nuclear matrix protein p84) isoform 3 [Bos taurus]
sw01939	153	289		427	507	1.1955	183	366		53	232
sw01943	342	534	0.9046	381	647	0.8264	581	979	0.6659	326	439	1.0083		gi|41327703|ref|NP_954988.1| apoptosis-inducing, TAF9-like domain 1 isoform A [Homo sapiens] apoptosis-inducing, TAF9-like domain 1 [Homo sapiens] apoptosis-inducing, TAF9-like domain 1 [Homo sapiens] APITD1 protein [Homo sapiens]
sw01945	321	484	0.9476	181	445	0.7384	92	222		204	900	0.3444		gi|55245784|gb|EAA04520.2| ENSANGP00000021425 [Anopheles gambiae str. PEST] ENSANGP00000021425 [Anopheles gambiae str. PEST]
sw01948	319	466	0.9615	484	589	1.086	302	454	0.7985	260	445	0.8236		gi|68397006|ref|XP_687410.1| PREDICTED: similar to Tankyrase 1 (TANK1) (Tankyrase I) (TNKS-1) (TRF1-interacting ankyrin-related ADP-ribose polymerase) [Danio rerio]
sw01949	981	1218	0.9557	926	1198	0.986	1571	1105	1.4169	1960	514	4.32		gi|68440549|ref|XP_708445.1| PREDICTED: similar to prolyl 4-hydroxylase, alpha I subunit isoform 1 precursor isoform 2 [Danio rerio]
sw01952	243	451	0.7762	245	397		414	277	1.8018	155	413	0.5915		gi|2852632|gb|AAC19155.1| unknown [Homo sapiens]
sw01956	289	446	0.8192	458	477	1.263	261	376		63	423	0.2251		gi|72007147|ref|XP_781890.1| PREDICTED: similar to 5-nucleotidase, cytosolic III isoform 2 [Strongylocentrotus purpuratus]
sw01958	1095	1313	0.9416	1187	1685	0.8345	1466	1945	0.7961	4196	1033	3.9705		gi|25010055|gb|AAN71193.1| GH24658p [Drosophila melanogaster]
sw01963	409	529	0.945	394	494	1.1237	362	425	1.1053	221	292			gi|55242022|gb|EAA07811.2| ENSANGP00000022159 [Anopheles gambiae str. PEST] ENSANGP00000022159 [Anopheles gambiae str. PEST]
sw01964	1719	1686	1.0321	2629	1635	1.8353	3537	2001	1.7003	1489	1249	1.4967		gi|72009576|ref|XP_781168.1| PREDICTED: similar to Beta-glucuronidase precursor (Beta-G1) [Strongylocentrotus purpuratus]
sw01969	513	655	0.9918	478	689	0.9187	749	785	0.9938	248	498	0.7259		gi|1932712|gb|AAB51605.1| prostate carcinoma tumor antigen [Homo sapiens]
sw01970	296	1141	0.3187	264	1008	0.2929	606	754	0.8806	42	519	0.1724
sw01974	341	468	0.9458	214	308		78	151		71	221			gi|82888843|ref|XP_907412.1| PREDICTED: similar to zinc finger protein 709 isoform 23 [Mus musculus]
sw01975	525	373	1.6186	497	633	0.9679	637	327	2.2061	310	356
sw01978	20392	15400	1.029	25711	24633	0.8963	7736	20795	0.3285	764	22949	0.0292		gi|3913392|sp|O02388|CU22_BOMMO Larval cuticle protein LCP-22 precursor LCP22 [Bombyx mori]
sw01981	671	869	0.9256	636	733	1.1024	528	581	0.9767	328	606	0.7469
sw01982	496	543	1.15	447	603	0.9037	141	426	0.4036	112	441	0.4142		gi|76632030|ref|XP_591093.2| PREDICTED: similar to BTB/POZ domain containing protein 3 isoform 1 [Bos taurus]
sw01983	529	384	1.578	732	630	1.3369	664	964	0.7718	628	403	1.8643		gi|17861640|gb|AAL39297.1| GH17087p [Drosophila melanogaster]
sw01985	208	299		287	414	0.9791	158	283		87	297			gi|1197194|emb|CAA64862.1| serotonin receptor [Bombyx mori] 5-hydroxytryptamine receptor (5-HT receptor) (Serotonin receptor)
sw01986	639	828	0.8792	832	1014	0.9318	283	497	0.7298	291	482	0.8921
sw01991	758	725	1.042	533	588	1.0553	346	389		263	456	0.8259		gi|56970605|gb|AAH88543.1| LOC496938 protein [Xenopus tropicalis]
sw01994	1418	1550	0.947	1613	1662	1.0177	1199	1203	1.0764	1383	865	1.9283		gi|27374203|gb|AAN87275.1| CG17337 [Drosophila virilis]
sw01998	1289	963	1.3618	717	852	0.9773	820	515	1.8336	680	1027	0.8329		gi|24585628|ref|NP_724324.1| CG8671-PA, isoform A [Drosophila melanogaster] CG8671-PA, isoform A [Drosophila melanogaster]
sw01999	1101	928	1.1391	1374	1625	0.8766	787	1634	0.5869	47	1118	0.0606		gi|6560645|gb|AAF16700.1| juvenile hormone binding protein precursor-like protein [Manduca sexta]
sw02000	2117	376	5.2966	24917	1523	10.9614	57087	6880	7.8501	104	208			gi|77411051|ref|ZP_00787405.1| cell wall surface anchor family protein [Streptococcus agalactiae CJB111] cell wall surface anchor family protein [Streptococcus agalactiae CJB111]
sw02002	325	374		317	411	0.9975	25	126		52	186			gi|73988183|ref|XP_851853.1| PREDICTED: similar to Rho guanine nucleotide exchange factor (GEF) 17 [Canis familiaris]
sw02003	4480	3557	1.0542	3772	4230	0.831	3865	3363	1.3067	1739	3164	0.5963		gi|66530257|ref|XP_396670.2| PREDICTED: similar to nuclear lamin C protein, partial [Apis mellifera]
sw02004	260	308		556	556	1.0339	306	472	0.7375	284	194			gi|55700848|dbj|BAD69789.1| Replication protein A large subunit [Bombyx mori]
sw02005	1325	1384	0.9667	1295	1431	0.9886	1207	1247	0.9622	224	1409	0.1932		gi|457927|gb|AAA81883.1| calcium channel alpha-1 subunit
sw02007	1455	1620	0.8295	1101	1266	0.9077	643	765	0.9397	383	849	0.6027		gi|27543526|dbj|BAC54566.1| aldo-keto reductase related protein 2 [Homo sapiens]
sw02008	178	282		447	407	1.178	63	185		73	186			gi|76639910|ref|XP_876225.1| PREDICTED: similar to Synaptic vesicle membrane protein VAT-1 homolog [Bos taurus]
sw02011	491	545	0.9929	265	381		80	237		78	231			gi|66530381|ref|XP_395692.2| PREDICTED: similar to dynein, axonemal, heavy polypeptide 3 [Apis mellifera]
sw02013	403	425	1.1386	380	446	1.1749	44	150		87	162			gi|66817518|ref|XP_642612.1| hypothetical protein DDB0217977 [Dictyostelium discoideum] hypothetical protein DDB0217977 [Dictyostelium discoideum]
sw02014	1727	1469	1.2058	1972	1706	1.2219	1089	1332	0.9559	912	1381	0.7898		gi|66525914|ref|XP_392728.2| PREDICTED: similar to inhibitor of growth family, member 3 isoform 1 [Apis mellifera]
sw02015	755	769	1.0166	612	728	0.9539	335	731	0.5151	67	969	0.1112		gi|86450719|gb|ABC96695.1| yellow2 [Bombyx mori]
sw02018	550	856	0.736	631	810	0.8936	925	514	2.1783	306	337			gi|6560645|gb|AAF16700.1| juvenile hormone binding protein precursor-like protein [Manduca sexta]
sw02019	501	617	0.9094	402	344	1.5911	209	295		13	518	0.1109
sw02022	1155	1231	1.0091	1588	1532	1.1077	514	887	0.7046	206	953	0.3463		gi|11066123|gb|AAG28471.1| Misexpression suppressor of ras 6 [Drosophila melanogaster]
sw02026	1031	1060	1.0644	1168	1443	0.8592	1012	1023	1.1612	842	685	1.6703		gi|75773502|gb|AAI05167.1| Ubiquitin carboxyl-terminal hydrolase L5 [Bos taurus] ubiquitin carboxyl-terminal hydrolase L5 [Bos taurus]
sw02028	808	667	1.2499	1153	1159	0.9918	753	713	1.2146	807	594	1.7259		No hits found
sw02030	393	468	1.0317	609	680	1.0621	74	206		119	239			gi|5059246|gb|AAD38952.1| ATP-dependent chromatin assembly factor large subunit [Drosophila melanogaster]
sw02031	1071	1229	0.8923	1013	1130	0.953	547	556	1.2071	475	816	0.7844		gi|473595|gb|AAA19857.1| moesin/ezrin/radixin homolog
sw02039	5025	4364	0.9541	5226	4297	1.1957	3301	2692	1.5262	2259	4000	0.5138
sw02044	407	486	0.9417	714	697	1.0569	853	451	1.9805	116	392			gi|7716830|gb|AAF68565.1| singed protein [Drosophila simulans]
sw02046	365	676	0.6521	328	925	0.4257	120	443	0.4544	188	417	0.7868		gi|62859495|ref|NP_001017001.1| NMDA receptor regulated 1-like [Xenopus tropicalis]
sw02050	1199	1233	1.1014	1204	1104	1.2674	555	519	1.3427	576	940	0.8751		gi|55239196|gb|EAA10720.2| ENSANGP00000004277 [Anopheles gambiae str. PEST] ENSANGP00000004277 [Anopheles gambiae str. PEST]
sw02052	457	523	0.9533	612	414	1.7267	324	260		40	473	0.1715		gi|89954443|gb|ABD83643.1| UNC-89 [Drosophila melanogaster]
sw02053	300	442	0.9293	436	441	1.2997	54	236		22	187			gi|18765778|dbj|BAB85216.1| ruby-like protein [Drosophila ananassae]
sw02055	251	275		436	427	1.2174	65	211		53	173			gi|33469941|ref|NP_061887.2| RNA polymerase I polypeptide B [Homo sapiens] unknown [Homo sapiens]
sw02057	331	445	1.0012	235	306		194	269		563	335	2.4017		gi|83944664|gb|ABC48936.1| cathepsin F like protease [Glossina morsitans morsitans]
sw02058	668	731	1.1259	986	869	1.3644	413	576	0.9526	77	623	0.2519		gi|34042969|gb|AAQ56702.1| UDP-GalNAc:polypeptide N-acetylgalactosaminyltransferase; PGANT5 [Drosophila melanogaster]
sw02066	263	318		295	447	0.8421	336	321		231	283
sw02068	567	509	1.1857	668	826	0.8145	270	434	0.839	530	457	1.734		gi|60688257|gb|AAH91408.1| RGD1306248 protein [Rattus norvegicus]
sw02071	244	234		392	475	0.9845	90	227		73	179			gi|7661998|ref|NP_055559.1| TBC1 domain family, member 5 [Homo sapiens] TBC1D5 protein [Homo sapiens] TBC1 domain family member 5
sw02073	2096	1953	1.0556	1962	2068	0.9519	1889	1159	1.5482	2853	1355	2.1218		gi|55614029|ref|XP_515921.1| PREDICTED: similar to G protein-coupled receptor 155 [Pan troglodytes]
sw02078	2537	2758	0.9532	2412	2407	1.0146	1392	1047	1.3484	773	1391	0.662		gi|54638648|gb|EAL28050.1| GA13556-PA [Drosophila pseudoobscura]
sw02079	557	598	0.948	711	742	1.0343	244	438	0.7557	368	582	0.8743		gi|45433528|ref|NP_955953.2| cullin 1 [Danio rerio] Cul1a protein [Danio rerio]
sw02081	449	503	1.0331	311	355		164	230		144	243			gi|6012073|gb|AAB82017.2| microfilarial sheath protein SHP3 [Litomosoides sigmodontis]
sw02082	294	349		513	440	1.3909	72	181		125	217
sw02083	245	296		441	397	1.2845	41	180		100	222			gi|82706178|gb|ABB89473.1| forkhead transcription factor Q2 [Strongylocentrotus purpuratus]
sw02084	23751	13688	1.1578	28455	23244	0.9562	9652	19922	0.5369	41530	13158	1.7677		gi|55243915|gb|EAA06000.2| ENSANGP00000015052 [Anopheles gambiae str. PEST] ENSANGP00000015052 [Anopheles gambiae str. PEST]
sw02087	309	384		458	460	1.1235	54	207		83	198			gi|30583245|gb|AAP35867.1| sorting nexin 12 [Homo sapiens] sorting nexin 12 [synthetic construct] sorting nexin 12 [synthetic construct] Sorting nexin-12
sw02089	653	749	0.948	365	528	0.8416	269	355		1158	541	2.4803
sw02090	1002	631	1.6552	256	322		55	117		29	197
sw02093	339	510	0.8032	349	344		184	263		95	321
sw02103	17595	11228	1.0817	16222	14671	0.9601	9313	13469	0.7405	12406	11463	0.9017		gi|16566731|gb|AAL26582.1| ribosomal protein S6 [Spodoptera frugiperda] 40S ribosomal protein S6
sw02105	841	859	0.9891	563	692	0.9269	698	905	0.9166	461	430	1.445		gi|14042939|ref|NP_114413.1| chromosome 10 open reading frame 11 [Homo sapiens] chromosome 10 open reading frame 11 [Homo sapiens] CDA017 [Homo sapiens] Protein C10orf11
sw02107	354	390		403	449	0.9721	62	184		82	183			gi|57036423|ref|XP_533639.1| PREDICTED: similar to radial spokehead-like 1 [Canis familiaris]
sw02108	6592	5382	0.8806	7361	5616	1.0532	5400	4729	1.2287	2527	6607	0.3338		gi|10304393|gb|AAG16235.1| ornithine decarboxylase antizyme [Bombyx mori]
sw02113	1971	2119	1.0137	1923	2163	1.0637	1416	1737	0.8119	961	1219	0.9849		gi|2854044|gb|AAC02533.1| Strabismus [Drosophila melanogaster]
sw02114	1956	1679	1.3154	1427	1285	1.4678	1275	964	1.3362	2464	1739	1.4282		gi|28317230|gb|AAO39622.1| GH12052p [Drosophila melanogaster]
sw02115	461	540	1.1886	464	607	1.2298	1217	593	2.005	1207	493	2.8962		gi|19923466|ref|NP_057417.2| splicing coactivator subunit SRm300 [Homo sapiens] RNA binding protein [Homo sapiens]
sw02116	1486	1492	1.1363	1087	1930	0.7017	1852	1077	1.7043	1206	1357	0.9266		gi|19550445|gb|AAL91368.1| legless [Drosophila melanogaster]
sw02117	9139	7766	1.0856	8427	10459	0.8908	9681	9973	0.9011	7170	7918	0.9602		gi|28416365|gb|AAO42655.1| GM13757p [Drosophila melanogaster]
sw02119	557	750	0.9979	577	784	1.1309	622	661	1.0201	201	424	0.8097		gi|50779806|ref|XP_423338.1| PREDICTED: similar to equilibrative nucleoside transporter 4; hENT4, partial [Gallus gallus]
sw02121	2321	1832	1.3311	2352	2570	1.0737	2740	1210	2.371	1724	1906	1.0578
sw02126	1985	2471	0.897	2618	3110	1.0531	2940	2441	1.2553	1629	1728	1.0039		gi|66532017|ref|XP_624411.1| PREDICTED: similar to mammalian A1, A2 /B1 hnRNP homologue, partial [Apis mellifera]
sw02127	478	617	1.0692	477	840	0.8874	904	647	1.4306	526	655	1.12		gi|72096187|ref|XP_796631.1| PREDICTED: similar to exportin 6, partial [Strongylocentrotus purpuratus]
sw02129	504	641	1.0448	415	588	1.0405	318	447	0.7935	418	398	1.5611
sw02130	6472	6178	0.9974	8691	10319	0.8859	8559	11057	0.8519	9702	9148	1.0222		gi|54609319|gb|AAV34875.1| ribosomal protein S17 [Bombyx mori] ribosomal protein S17 [Spodoptera frugiperda] 40S ribosomal protein S17
sw02133	702	849	1.0356	582	675	1.1903	510	489	1.1031	321	571	0.8351		gi|76618647|ref|XP_882087.1| PREDICTED: similar to ubiquitin specific protease 52 isoform 9 [Bos taurus]
sw02140	233	376		322	490	0.9268	230	480	0.6014	788	310	3.2329		gi|1209648|gb|AAC47002.1| protein tyrosine phosphatase DLAR protein tyrosine phosphatase (DLAR) precursor
sw02141	305	546	0.7872	324	573	0.8766	807	868	0.9308	158	366
sw02143	25	116		277	187		1483	274	6.3915	505	109	6.6214		gi|217280|dbj|BAA02093.1| hemolymph protein [Bombyx mori]
sw02148	333	547	0.7266	414	437	1.2692	295	361		105	430	0.333
sw02154	413	694	0.7993	759	972	0.9776	862	832	1.2137	3369	482	7.1153		gi|49612944|emb|CAG76395.1| putative gamma-glutamyltranspeptidase [Erwinia carotovora subsp. atroseptica SCRI1043] putative gamma-glutamyltranspeptidase [Erwinia carotovora subsp. atroseptica SCRI1043]
sw02159	209	725	0.3797	187	304		130	232		69	213			gi|54641648|gb|EAL30398.1| GA10525-PA [Drosophila pseudoobscura]
sw02160	426	598	0.8383	699	658	1.3104	421	463	0.9909	321	587	0.7033		gi|54035529|gb|AAH83824.1| Ss18 protein [Rattus norvegicus]
sw02162	789	872	1.0696	605	860	0.7973	397	337		348	431	1.1067
sw02166	984	1070	1.0536	979	1109	0.9721	1128	915	1.4223	772	909	0.9678		gi|66519959|ref|XP_396203.2| PREDICTED: similar to DNA topoisomerase I [Apis mellifera]
sw02171	347	444	0.9118	287	437	0.9141	206	234		151	303			No hits found
sw02176	45369	26532	1.0924	69258	29855	1.4588	51765	27171	1.6967	4044	49631	0.0467		gi|90567700|emb|CAI30053.1| muscular protein 20 [Hydroporus erythrocephalus]
sw02182	276	331		220	462	0.7073	120	388		183	421	0.7094		gi|50755675|ref|XP_414848.1| PREDICTED: similar to Growth factor, erv1 (S. cerevisiae)-like (augmenter of liver regeneration) [Gallus gallus]
sw02184	145	287		275	315		661	308	2.4171	60	270			gi|7716830|gb|AAF68565.1| singed protein [Drosophila simulans]
sw02185	2400	2430	0.9405	2264	2537	0.9615	2108	1816	1.1564	2664	2920	0.8933		gi|76681614|ref|XP_879459.1| PREDICTED: similar to Eukaryotic translation initiation factor 5 (eIF-5) isoform 7 [Bos taurus] PREDICTED: similar to Eukaryotic translation initiation factor 5 (eIF-5) isoform 1 [Bos taurus] PREDICTED: similar to Eukaryotic translation initiation factor 5 (eIF-5) isoform 5 [Bos taurus] PREDICTED: similar to Eukaryotic translation initiation factor 5 (eIF-5) isoform 3…
sw02186	256	437	0.8007	159	349		34	205		64	231			gi|2911799|gb|AAC39366.1| 4-coumarate:CoA ligase 1 [Populus balsamifera subsp. trichocarpa x Populus deltoides]
sw02187	496	448	1.2098	307	426	0.9335	311	342		133	248
sw02189	822	876	1.0286	432	546	1.008	581	408	1.507	155	578	0.3903		gi|54636311|gb|EAL25714.1| GA10531-PA [Drosophila pseudoobscura]
sw02190	3661	4342	0.7934	3113	3578	0.852	2764	2955	0.9558	2409	3445	0.6632		gi|2935517|gb|AAC05144.1| methionine aminopeptidase [Drosophila melanogaster]
sw02191	601	537	1.1823	253	333		33	117		64	209			gi|55234526|gb|EAA00204.2| ENSANGP00000009171 [Anopheles gambiae str. PEST] ENSANGP00000009171 [Anopheles gambiae str. PEST]
sw02194	724	738	1.1202	630	765	0.9362	351	355		412	505	1.1647		gi|2944400|gb|AAC05273.1| geranylgeranyl pyrophosphate synthase [Drosophila melanogaster]
sw02195	384	402	1.1163	231	311		107	285		41	282			No hits found
sw02196	599	450	1.4904	740	618	1.1961	505	446	1.2595	329	450	0.9971		gi|82888494|ref|XP_907883.1| PREDICTED: similar to zinc finger protein 91 isoform 12 [Mus musculus] PREDICTED: similar to zinc finger protein 91 isoform 11 [Mus musculus]
sw02203	345	415	0.967	168	262		69	156		37	159			gi|11993330|gb|AAG42690.1| single-minded [Xenopus laevis]
sw02204	649	693	0.9928	815	803	1.0066	785	738	1.1356	705	635	1.2926		gi|66532600|ref|XP_392743.2| PREDICTED: similar to phospholipase A2, activating protein [Apis mellifera]
sw02205	11603	10601	0.8611	15515	16944	0.8556	10594	15673	0.6645	2609	13443	0.1679		gi|78172883|gb|ABB29466.1| glutathione S-transferase [Corcyra cephalonica]
sw02206	11254	11493	0.8174	9262	9364	0.9581	6175	7658	0.9469	10498	11183	0.8483		gi|5802970|ref|NP_006787.1| AFG3 ATPase family gene 3-like 2 [Homo sapiens] paraplegin-like protein [Homo sapiens] AFG3-like protein 2 (Paraplegin-like protein)
sw02208	359	492	0.834	569	455	1.2898	456	420	1.2171	271	337			gi|68432309|ref|XP_687509.1| PREDICTED: similar to zinc finger protein ZFP235, partial [Danio rerio]
sw02209	263	422	0.8699	434	635	0.8362	264	367		328	389			gi|12249195|gb|AAG28734.2| ADD1/SREBP-1c [Rattus norvegicus]
sw02210	2369	2602	0.9057	3145	3258	0.9681	2598	2205	1.3242	1705	1905	1.0556		gi|38494277|gb|AAH61627.1| 26S protease regulatory subunit 7 [Xenopus tropicalis] XMSS1 protein [Xenopus laevis] xMSS1 [Xenopus laevis] 26S protease regulatory subunit 7 [Xenopus tropicalis] 26S protease regulatory subunit 7 (MSS1 protein) proteasome (prosome, macropain) 26S subunit, ATPase 2 [Xenopus tropicalis] MSS1-like protein
sw02212	3104	3667	0.7549	4280	3064	1.2621	1816	2457	0.7301	887	3033	0.3117		gi|71367849|ref|ZP_00658364.1| similar to Methylase involved in ubiquinone/menaquinone biosynthesis [Nocardioides sp. JS614] similar to Methylase involved in ubiquinone/menaquinone biosynthesis [Nocardioides sp. JS614]
sw02215	799	764	1.1371	620	801	0.8455	614	861	0.8337	462	577	1.0939		gi|72139355|ref|XP_782322.1| PREDICTED: similar to Protein KIAA0652, partial [Strongylocentrotus purpuratus]
sw02216	1056	1241	0.8431	1510	1329	1.1107	608	812	0.8078	414	1080	0.509		gi|81248546|gb|ABB69054.1| cytochrome P450 [Helicoverpa armigera]
sw02219	394	481	0.9639	392	554	0.8494	116	239		124	276
sw02222	425	425	1.2328	306	505	0.7489	305	288		267	516	0.8208		gi|47937439|gb|AAH71273.1| Chondroitin polymerizing factor, isoform a [Mus musculus] chondroitin polymerizing factor isoform a [Mus musculus] Chondroitin sulfate synthase 2 (Glucuronosyl-N-acetylgalactosaminyl-proteoglycan 4-beta-N-acetylgalactosaminyltransferase II) (N-acetylgalactosaminyl-proteoglycan 3-beta-glucuronosyltransferase II) (Chondroitin glucuronyltransferase II) (N-acetylgalactosami…
sw02226	251	344		392	449	1.1368	59	128		74	178			gi|66562546|ref|XP_392711.2| PREDICTED: similar to ENSANGP00000020083 [Apis mellifera]
sw02229	158	336		188	419	0.6319	108	267		58	339			gi|295756|emb|CAA33113.1| TU-36B protein [Drosophila melanogaster]
sw02232	13759	9480	1.0566	20660	14055	1.2621	7207	11563	0.7764	514	13036	0.0362		gi|47605413|sp|Q7M4F3|CUD2_SCHGR Endocuticle structural glycoprotein SgAbd-2
sw02237	583	854	0.84	642	849	0.8808	279	419	0.8363	456	611	1.1163		gi|76652215|ref|XP_873087.1| PREDICTED: similar to Asparaginyl-tRNA synthetase, cytoplasmic (Asparagine--tRNA ligase) (AsnRS) [Bos taurus]
sw02239	487	553	1.0045	388	577	0.7936	222	416	0.7981	471	300	2.2271		gi|87248467|gb|ABD36286.1| unknown [Bombyx mori]
sw02240	734	846	0.8973	807	1071	0.742	953	971	1.0852	444	615	1.1217
sw02241	282	418	0.9355	513	736	0.8336	226	449	0.6705	223	391			gi|60677713|gb|AAX33363.1| RH65810p [Drosophila melanogaster]
sw02243	392	421	1.0965	453	539	0.9626	128	282		110	264			gi|6634096|emb|CAB64265.1| BIP2 protein [Drosophila melanogaster]
sw02251	193	271		400	397	1.2217	27	179		29	104			gi|79676085|emb|CAJ42046.1| core alpha 1,3-fucosyltransferase [Drosophila ananassae]
sw02252	464	471	1.0752	267	346		198	276		157	322
sw02254	205	304		384	513	0.9868	63	217		30	218			gi|3372753|gb|AAC61263.1| soluble guanylyl cyclase alpha-1 subunit [Manduca sexta]
sw02257	261	385		305	425	0.9223	35	217		66	188			gi|54638450|gb|EAL27852.1| GA13041-PA [Drosophila pseudoobscura]
sw02258	3023	2638	1.1777	3834	2040	1.9792	1899	1060	1.7471	286	2215	0.1747		gi|25014093|ref|NP_689492.2| zinc finger protein 585B [Homo sapiens] zinc finger protein 41-like protein [Homo sapiens]
sw02259	442	404	1.2174	537	673	0.8916	203	296		396	332
sw02260	314	391		341	420	0.9261	112	171		177	243
sw02261	363	413	1.0986	359	355		140	192		156	348
sw02262	1806	2080	0.9281	1977	1757	1.1511	1444	1257	1.1824	2268	2004	1.1804		gi|37682139|gb|AAQ97996.1| myosin regulatory light chain interacting protein [Danio rerio] myosin regulatory light chain interacting protein [Danio rerio] Ubiquitin ligase MYLIP (Myosin regulatory light chain interacting protein) (MIR)
sw02263	377	351		396	424	1.1211	61	203		44	154			gi|73973430|ref|XP_867806.1| PREDICTED: similar to Protein C6orf165 isoform 2 [Canis familiaris]
sw02266	2173	2533	0.9009	2240	2541	0.8861	1795	2121	0.9029	2317	1870	1.2899
sw02267	358	360		652	513	1.4046	141	277		177	298			gi|18543263|ref|NP_569973.1| CG4281-PA [Drosophila melanogaster] GH10944p [Drosophila melanogaster] CG4281-PA [Drosophila melanogaster]
sw02268	1717	1888	0.811	2103	1836	1.0528	1504	1700	0.9429	978	1476	0.8365		gi|11067391|ref|NP_067703.1| transmembrane protein 33 isoform 1 [Rattus norvegicus] Transmembrane protein 33 (DB83 protein) db83 [Rattus norvegicus]
sw02271	409	465	0.9515	402	490	0.9723	82	222		116	277			No hits found
sw02274	359	503	0.869	335	383		240	227		185	366
sw02275	284	322		532	521	1.1276	51	231		76	259
sw02280	4029	3672	0.8731	5422	3812	1.2351	2166	2269	0.981	2059	3419	0.5373
sw02282	283	389		295	403	0.9133	125	268		96	253			gi|72139805|ref|XP_791124.1| PREDICTED: similar to ras homolog gene family, member T1 [Strongylocentrotus purpuratus]
sw02283	387	423	0.9987	251	293		78	285		94	264			gi|50754165|ref|XP_414267.1| PREDICTED: similar to ring finger protein 123 [Gallus gallus]
sw02286	951	984	1.0475	539	774	0.7694	406	474	0.9283	588	739	0.8866
sw02287	477	500	0.9997	365	376		441	466	1.109	79	433	0.3798		No hits found
sw02288	1494	1318	1.0052	1878	1936	0.8379	1135	1331	0.8551	1197	1327	0.9831		gi|66510403|ref|XP_393333.2| PREDICTED: similar to GA20974-PA [Apis mellifera]
sw02292	474	403	1.2158	191	274		59	221		113	311			gi|73959487|ref|XP_537004.2| PREDICTED: similar to ATP-binding cassette, sub-family A member 3 [Canis familiaris]
sw02296	744	785	0.8862	462	502	0.9383	105	259		211	372
sw02297	1321	1259	1.0146	1400	1283	1.132	1257	984	1.3971	1261	1073	1.3212
sw02299	383	443	0.8994	273	330		153	243		179	271			gi|66561028|ref|XP_395399.2| PREDICTED: similar to Zinc finger protein 268 (Zinc finger protein HZF3), partial [Apis mellifera]
sw02300	329	385		304	447	0.7506	47	231		54	184			gi|50750481|ref|XP_422014.1| PREDICTED: similar to glycoprotein receptor gp330/megalin precursor [Gallus gallus]
sw02304	980	757	1.2294	825	742	1.0334	1057	572	2.0686	1275	729	2.0776
sw02305	665	793	1.0288	381	651	0.9209	297	481	0.7481	300	609	0.7511		gi|55243645|gb|EAA45149.2| ENSANGP00000023020 [Anopheles gambiae str. PEST] ENSANGP00000023020 [Anopheles gambiae str. PEST]
sw02308	125	309		121	438	0.5603	39	235		9	215
sw02309	3910	2927	1.3298	6049	3671	1.7159	9498	4519	2.0762	10005	2401	4.2936		gi|68418478|ref|XP_700202.1| PREDICTED: similar to nidogen 1; entactin [Danio rerio]
sw02310	533	575	1.2262	543	784	1.0064	3651	841	4.4673	135	477	0.4719		gi|72179523|ref|XP_786725.1| PREDICTED: similar to HIV-1 Rev binding protein 2 homolog [Strongylocentrotus purpuratus]
sw02311	2996	3883	0.7973	3346	2998	1.3601	3224	3050	1.0332	1513	3340	0.462		gi|25012192|gb|AAN71212.1| GM16802p [Drosophila melanogaster]
sw02312	1226	1372	1.0331	1440	1642	1.0888	1583	1057	1.4757	861	840	1.1704		No hits found
sw02318	294	398		309	489	1.0506	259	275		81	181
sw02320	173	293		288	416	1.1383	64	207		57	215
sw02322	285	406	1.0505	299	434	1.1066	153	208		37	194			gi|24581499|ref|NP_608796.1| CG10017-PA [Drosophila melanogaster] CG10017-PA [Drosophila melanogaster]
sw02323	146	179		107	304		218	183		426	272	2.0736		gi|72157944|ref|XP_791165.1| PREDICTED: similar to ATP-binding cassette, sub-family A member 3 [Strongylocentrotus purpuratus]
sw02327	278	407	1.0235	354	392		463	364	1.5765	261	271			gi|50750706|ref|XP_422105.1| PREDICTED: similar to solute carrier family 12, member 8; solute carrier family 12 (sodium/potassium/chloride transporters), member 8; cation-chloride cotransporter 9 [Gallus gallus]
sw02328	765	1330	0.6523	444	790	0.6994	1059	905	1.1534	1356	908	1.6573		gi|72045503|ref|XP_797188.1| PREDICTED: similar to butyrate-induced transcript 1 [Strongylocentrotus purpuratus]
sw02332	279	401	1.0135	124	308		65	220		30	184			gi|72142027|ref|XP_781681.1| PREDICTED: similar to DNA-directed RNA polymerase III largest subunit (RPC155) (RPC1), partial [Strongylocentrotus purpuratus]
sw02333	235	263		217	392		384	290		491	346	2.0893
sw02334	282	437	0.9513	355	533	1.0008	373	455	1.1147	2992	680	5.3254		gi|1561730|gb|AAC47288.1| Dreg-3 protein [Drosophila melanogaster]
sw02335	768	1140	0.8209	541	807	0.9003	542	780	0.7958	275	985	0.3854		No hits found
sw02342	244	433	0.834	300	453	0.9937	70	196		55	259
sw02343	752	876	0.9523	705	1023	0.8507	752	947	0.9278	269	569	0.594		gi|5052678|gb|AAD38669.1| BcDNA.LD32788 [Drosophila melanogaster] Adenylosuccinate synthetase (IMP--aspartate ligase) (AdSS) (AMPSase)
sw02345	906	1385	0.7311	825	1192	0.8732	1018	1076	0.9138	38	1573	0.0482		gi|72014091|ref|XP_786946.1| PREDICTED: similar to cytochrome P450, family 4, subfamily v, polypeptide 2 [Strongylocentrotus purpuratus]
sw02351	413	545	0.9229	392	587	0.9274	246	497	0.6729	85	335
sw02352	314	436	0.9178	177	306		59	162		71	175			gi|3213199|gb|AAC39084.1| prophosphoribosylamidotransferase [Drosophila melanogaster]
sw02353	792	887	1.0586	678	810	1.0531	746	1054	0.7246	1349	1312	1.1013		No hits found
sw02355	1533	1058	1.4037	1315	1216	1.1326	1748	1035	1.6073	1092	1043	1.141
sw02364	337	443	0.9267	126	220		33	158		47	140
sw02366	1004	1103	1.0386	970	1337	0.7768	581	848	0.7213	553	979	0.6563		gi|157212|gb|AAA28455.1| cGMP-dependent protein kinase
sw02367	383	572	0.7505	213	422	0.7558	119	255		55	231
sw02369	357	498	0.9056	283	428	0.9357	159	253		143	254			gi|76664291|ref|XP_617996.2| PREDICTED: similar to PHD finger protein 14 isoform 1, partial [Bos taurus]
sw02370	326	437	0.9766	220	282		75	200		51	164			gi|8096219|dbj|BAA96093.1| Trio [Drosophila melanogaster]
sw02371	1451	1511	0.8424	970	815	1.3042	889	577	1.6757	966	1271	0.8175
sw02376	534	484	1.2054	448	464	1.0716	70	199		60	163			No hits found
sw02380	405	396	1.1859	271	284		60	204		76	175
sw02381	297	411	0.9465	433	449	1.2313	210	319		451	359	1.7323		gi|66546685|ref|XP_395583.2| PREDICTED: similar to polyhomeotic 3 [Apis mellifera]
sw02387	884	1582	0.5139	302	311		206	324		143	281			gi|4760786|dbj|BAA77401.1| 30kP protease A (43k peptide) precursor [Bombyx mori]
sw02388	316	360		388	372		510	404	1.4096	276	238			gi|45382795|ref|NP_990827.1| golgi apparatus protein 1 [Gallus gallus] Golgi apparatus protein 1 precursor (Cysteine-rich fibroblast growth factor receptor) cysteine-rich fibroblast growth factor receptor
sw02390	18375	15115	0.9825	20331	16807	1.1348	16808	18379	1.1015	22399	14221	1.3917		gi|21630233|gb|AAM69353.1| serine proteinase-like protein 2 [Manduca sexta]
sw02392	382	431	1.0253	340	474	0.8002	326	259		239	420	0.8365
sw02393	123	239		209	407	0.7641	75	228		38	196			gi|68366858|ref|XP_683416.1| PREDICTED: similar to SI:bY143E18.1 (novel protein similar to human alpha 2 type V collagen (COL5A2)) [Danio rerio]
sw02394	334	402	1.0735	361	434	1.0503	169	225		195	436	0.7049		gi|30175234|gb|EAA43818.1| ENSANGP00000023691 [Anopheles gambiae str. PEST] ENSANGP00000023691 [Anopheles gambiae str. PEST]
sw02395	221	389		221	401	0.7915	211	366		79	261			gi|60393084|gb|AAX19492.1| slalom PAPS transporter [Lucilia sericata]
sw02397	236	316		286	428	0.9515	88	218		71	220			gi|55239504|gb|EAA10596.2| ENSANGP00000020907 [Anopheles gambiae str. PEST] ENSANGP00000020907 [Anopheles gambiae str. PEST]
sw02398	460	635	0.8645	535	389	1.6851	314	301		230	491	0.7026
sw02399	307	437	0.8126	236	388		91	174		91	230			gi|4759196|ref|NP_004810.1| symplekin [Homo sapiens] Symplekin [Homo sapiens] Symplekin [Homo sapiens] symplekin symplekin [Homo sapiens]
sw02400	2035	2753	0.669	2836	1850	1.4009	1102	2497	0.4581	60	2811	0.0297
sw02402	1882	1390	1.4117	2787	1769	1.7092	930	1603	0.6699	138	1695	0.1332		gi|14250736|gb|AAH08837.1| Aldo-keto reductase family 1, member B10 [Homo sapiens] aldo-keto reductase family 1, member B10 (aldose reductase) [Homo sapiens] AKR1B10 [Homo sapiens] aldo-keto reductase family 1 member B10 [synthetic construct] aldo-keto reductase family 1 member B10 [synthetic construct] aldo-keto reductase family 1, member B10 [Homo sapiens] Aldo-keto reductase family 1 member B1…
sw02403	814	843	1.0334	1079	944	1.2546	400	435	1.184	187	457	0.6789		gi|54638381|gb|EAL27783.1| GA10288-PA [Drosophila pseudoobscura]
sw02406	743	770	1.0975	1102	1167	1.04	201	402	0.6944	325	433	1.1752		gi|3850044|emb|CAA07022.1| beta-tubulin cofactor D [Homo sapiens]
sw02409	311	341		437	471	1.1563	67	179		40	158
sw02412	285	341		204	402	0.6603	74	226		79	272			gi|600833|gb|AAC46945.1| mariner transposase
sw02416	942	923	1.0282	1011	943	1.0884	608	700	0.9744	420	810	0.7133
sw02417	198	309		245	403	0.8531	55	232		71	244			gi|68364376|ref|XP_694589.1| PREDICTED: similar to Potassium voltage-gated channel subfamily G member 4 (Voltage-gated potassium channel subunit Kv6.4) [Danio rerio]
sw02418	364	419	1.148	520	488	1.3468	34	150		31	119			gi|39652915|emb|CAE25657.1| possible OmpA family member [Rhodopseudomonas palustris CGA009] possible OmpA family member [Rhodopseudomonas palustris CGA009]
sw02419	321	400	0.9866	305	468	0.8146	96	224		84	208
sw02423	2535	2447	0.9155	1790	2006	0.9136	659	682	1.3084	1236	1842	0.6702		gi|2772930|gb|AAB96643.1| Genghis Khan [Drosophila melanogaster]
sw02428	1323	1350	0.9446	1666	1183	1.3951	1570	1069	1.5167	1101	1327	1.0286		gi|37694070|ref|NP_937755.1| retinoblastoma binding protein 1-like 1 isoform 2 [Mus musculus]
sw02429	4054	5419	0.7669	4978	3861	1.4169	2541	2000	1.3771	1219	4846	0.2362		gi|1841419|emb|CAA31918.1| glucose dehydrogenase [Drosophila melanogaster]
sw02430	573	666	1.0265	586	644	1.1076	361	345		743	1206	0.782		No hits found
sw02431	274	351		420	458	1.1181	65	198		68	158
sw02434	302	381		394	497	1.052	85	186		128	343
sw02435	233	302		428	471	1.0671	53	178		61	195			gi|89267847|emb|CAJ82878.1| Novel protein containing fatty acid desaturase domain [Xenopus tropicalis]
sw02437	570	1012	0.6679	985	1052	1.0301	562	802	0.8076	66	849	0.1896
sw02438	214	553	0.5253	346	402	1.1951	202	228		69	205
sw02440	448	489	1.0028	829	661	1.341	235	328		603	520	1.8511		No hits found
sw02442	239	507	0.6441	236	411	0.818	94	230		65	415	0.3685		No hits found
sw02443	670	513	1.4528	291	475	0.7293	427	425	1.4008	508	710	0.8679
sw02445	204	375		296	401	1.0213	28	245		66	280			No hits found
sw02447	230	407	0.711	243	333		32	213		69	207
sw02449	578	838	0.8337	653	660	1.0882	218	300		105	328			gi|155847|gb|AAA27787.1| class C chorion protein, [Antheraea polyphemus] Chorion class CB protein PC404
sw02450	413	428	1.2228	617	628	1.1311	169	224		156	305
sw02455	284	339		429	409	1.2469	56	191		112	173			gi|83273889|ref|XP_729596.1| peptidyl prolyl cis-trans isomerase [Plasmodium yoelii yoelii str. 17XNL] putative peptidyl prolyl cis-trans isomerase with RNA binding region [Plasmodium yoelii yoelii]
sw02456	985	808	1.1954	1456	1310	1.0639	518	751	0.8019	694	713	1.3891
sw02457	7291	6955	0.8698	9857	9404	0.9361	6970	7522	0.9934	9183	7372	1.1244		gi|87248235|gb|ABD36170.1| tetraspanin E [Bombyx mori]
sw02458	1126	1604	0.7763	1824	1327	1.4393	717	639	1.1908	590	945	0.7983		gi|66526389|ref|XP_396342.2| PREDICTED: similar to A disintegrin and metalloproteinase with thrombospondin motifs 1 [Apis mellifera]
sw02459	533	521	1.0734	359	376		219	237		261	426	0.9251		No hits found
sw02466	509	612	0.9587	418	508	0.9654	81	143		122	357
sw02471	395	450	0.9539	324	444	0.8548	226	328		306	491	0.9387		gi|66558038|ref|XP_625099.1| PREDICTED: similar to tetraspanin D107 [Apis mellifera]
sw02473	339	419	0.9779	341	503	0.834	280	431	0.8319	145	275			No hits found
sw02474	287	417	0.8765	478	611	0.8931	76	177		83	188			gi|28972457|dbj|BAC65682.1| mKIAA0909 protein [Mus musculus]
sw02475	615	623	0.9883	449	420	1.2256	144	277		84	301			gi|21624017|dbj|BAC01051.1| carotenoid-binding protein [Bombyx mori]
sw02477	8640	6747	1.1145	9874	8722	1.0071	8102	8393	0.9904	7934	5751	1.3216		gi|2492684|sp|Q60445|COPE_CRIGR Coatomer subunit epsilon (Epsilon-coat protein) (Epsilon-COP) (LDLF) epsilon-COP; ldlFp [Cricetulus griseus]
sw02480	876	643	1.3269	608	656	0.9045	633	449	1.5919	622	817	0.9454
sw02481	278	413	0.7813	334	368		33	173		47	194			gi|1621117|gb|AAC47315.1| Frazzled [Drosophila melanogaster]
sw02484	2064	2039	0.8368	3198	1985	1.3471	1086	1151	1.0168	688	1715	0.4616		No hits found
sw02486	445	593	0.9238	605	721	0.9097	167	248		127	317
sw02488	753	726	0.9821	431	532	0.8351	169	348		97	527	0.3372		gi|60677879|gb|AAX33446.1| RE23705p [Drosophila melanogaster]
sw02491	783	610	1.2144	446	447	1.0768	482	320	1.8904	280	583	0.6371
sw02492	997	819	1.1421	753	802	0.8851	853	595	1.6109	910	760	1.4971		No hits found
sw02497	1045	1576	0.7802	935	1484	0.8454	710	919	0.8342	325	642	0.7604		gi|72034990|ref|XP_784939.1| PREDICTED: similar to predicted CDS, peptidase family A16 and RNA-directed DNA polymerase and Integrase, catalytic domain and Zn-finger, CCHC type (XC382) [Strongylocentrotus purpuratus]
sw02498	366	394		278	551	0.8386	253	249		46	301			No hits found
sw02502	376	458	1.1592	500	699	1.0583	369	333		154	360
sw02503	239	356		516	753	1.0697	662	934	0.7701	681	626	1.4413		gi|4090968|gb|AAD09281.1| immune-related Hdd13 [Hyphantria cunea]
sw02504	2524	3146	0.8198	4147	3811	1.2301	1910	2663	0.6612	1037	3762	0.288		gi|28566306|gb|AAO43053.1| heat shock regulated-1 [Homo sapiens]
sw02512	301	445	1.0171	327	491	1.0405	27	142		75	196			gi|3413886|dbj|BAA32307.1| KIAA0462 protein [Homo sapiens]
sw02517	294	444	0.9644	218	400	0.961	143	211		94	270			gi|3893109|emb|CAA76940.1| CALO protein [Drosophila melanogaster]
sw02518	473	125	7.181	31	200		398	87		452	414	1.6966		gi|15459286|gb|AAL00420.1| Sucrose-6-phosphate hydrolase [Streptococcus pneumoniae R6] Sucrose-6-phosphate hydrolase [Streptococcus pneumoniae R6]
sw02521	227	406	0.8519	257	387		99	231		86	240
sw02524	1400	1641	0.9348	1213	1500	0.9167	1596	1727	0.8967	466	1344	0.4076
sw02527	174	299		139	309		215	258		133	441	0.5185		gi|72014660|ref|XP_782939.1| PREDICTED: similar to nucleolar RNA-associated protein long isoform [Strongylocentrotus purpuratus]
sw02528	495	1066	0.5531	419	1083	0.4534	748	763	0.9977	228	441	0.7457		No hits found
sw02531	640	849	0.8508	376	717	0.7235	240	463	0.7087	137	472	0.4189		gi|5453303|gb|AAD43525.1| serine/threonine protein kinase [Drosophila melanogaster]
sw02532	3481	2525	1.3556	3435	3240	1.0936	3441	1623	2.0711	2537	2684	1.0097		No hits found
sw02539	302	541	0.7122	298	715	0.5989	490	883	0.6861	386	552	0.8602
sw02545	440	530	1.0898	411	476	1.2018	250	383		314	365			gi|50745505|ref|XP_420132.1| PREDICTED: similar to Diacylglycerol kinase, delta (Diglyceride kinase) (DGK-delta) (DAG kinase delta) (130 kDa diacylglycerol kinase), partial [Gallus gallus]
sw02553	309	490	0.8594	397	587	0.9296	330	463	0.8272	52	371			No hits found
sw02555	319	457	0.817	134	249		107	313		66	155			gi|1706132|sp|P17264|CRO_RANCA Rho crystallin
sw02560	329	389		214	406	0.7531	263	276		116	259
sw02561	1428	1411	1.0285	1843	2115	0.9526	2133	1999	1.0648	3733	1427	2.6711		gi|67678029|gb|AAH97945.1| Alcohol dehydrogenase, iron containing, 1 [Rattus norvegicus] alcohol dehydrogenase, iron containing, 1 [Rattus norvegicus]
sw02565	316	443	0.9237	292	416	0.986	96	205		125	237			gi|82931439|ref|XP_893519.1| PREDICTED: similar to zinc finger protein 660 [Mus musculus]
sw02567	349	437	0.8711	70	229		28	147		18	159			No hits found
sw02570	1183	1061	1.154	781	1156	0.7792	1206	721	1.8451	1104	1123	1.1778		gi|50732147|ref|XP_418501.1| PREDICTED: similar to obscurin, cytoskeletal calmodulin and titin-interacting RhoGEF [Gallus gallus]
sw02573	233	288		233	296		117	300		797	394	2.6353		No hits found
sw02575	195	227		96	219		134	452	0.5268	157	231
sw02576	2717	1656	1.4426	4097	3216	1.0969	3533	2545	1.2896	9125	1226	8.1633		gi|66500891|ref|XP_623870.1| PREDICTED: similar to ENSANGP00000021863 [Apis mellifera]
sw02578	709	808	0.9931	406	456	1.1037	94	216		195	342
sw02581	2453	1928	1.2135	2844	2359	1.2684	1968	1160	1.8126	4785	787	5.8413
sw02584	1724	1505	1.1134	2823	2516	1.039	2242	1790	1.3047	1325	1264	1.0755		No hits found
sw02589	289	351		401	512	1.0463	487	388	1.545	343	357			gi|5713156|gb|AAD47830.1| sodium-dependent excitatory amino acid transporter 2 [Drosophila melanogaster]
sw02592	688	679	1.0738	737	586	1.2579	137	287		182	313
sw02593	285	363		392	431	1.1635	106	196		108	253			No hits found
sw02595	349	418	1.0116	570	616	1.0737	39	228		68	238
sw02597	408	487	1.1064	780	733	1.2303	259	417	0.7642	60	644	0.1371
sw02599	3234	2502	1.2636	3283	3800	0.8383	2877	3873	0.8623	3140	3310	0.9946		gi|62857571|ref|NP_001017209.1| thioredoxin-like 2 [Xenopus tropicalis]
sw02602	220	241		374	535	0.8518	270	535	0.6515	762	396	2.744
sw02603	587	904	0.6773	647	879	0.791	395	362		128	531	0.4294		gi|74016782|ref|ZP_00687407.1| Cobalamin (vitamin B12) biosynthesis CbiD protein [Burkholderia ambifaria AMMD] Cobalamin (vitamin B12) biosynthesis CbiD protein [Burkholderia ambifaria AMMD]
sw02604	419	551	0.8605	321	406	0.9601	105	243		143	273			gi|72174216|ref|XP_788077.1| PREDICTED: similar to ataxia telangiectasia and Rad3 related protein [Strongylocentrotus purpuratus]
sw02606	347	395		379	426	1.1453	254	261		64	326			gi|66508249|ref|XP_396311.2| PREDICTED: similar to ENSANGP00000015183 [Apis mellifera]
sw02607	359	480	0.8802	522	590	1.0402	157	357		182	228			gi|1549143|dbj|BAA07466.1| ORF1 [Bombyx mori]
sw02611	440	516	0.9914	765	656	1.3331	23	179		71	206			gi|22092|emb|CAA45514.1| hydroxyproline-rich glycoprotein [Zea diploperennis]
sw02613	338	557	0.8133	570	708	0.9748	334	281		201	438	0.8063		gi|72039955|ref|XP_790832.1| PREDICTED: similar to Probable mitochondrial import receptor subunit TOM40 homolog (Translocase of outer membrane 40 kDa subunit homolog) (Haymaker protein) (p38.5) [Strongylocentrotus purpuratus]
sw02616	152	193		412	396	1.1814	51	190		82	206			No hits found
sw02617	283	473	0.8331	512	502	1.35	313	526	0.7119	238	357			gi|7387471|gb|AAF61743.1| fruitless type D [Drosophila heteroneura]
sw02618	987	924	1.2241	1429	1414	1.1422	2439	1341	1.8788	1598	825	2.4083		No hits found
sw02619	708	615	1.2413	592	758	0.8807	665	1049	0.7999	410	647	0.8576		gi|66509068|ref|XP_624984.1| PREDICTED: similar to Polymerase (RNA) III (DNA directed) polypeptide F [Apis mellifera]
sw02623	331	395		590	591	1.1586	57	219		21	124			No hits found
sw02626	246	328		449	475	1.2533	41	173		74	155
sw02627	321	388		396	447	1.0498	50	134		72	184
sw02628	353	524	0.7582	427	518	0.9092	527	890	0.7231	433	295	2.7601
sw02631	280	422	0.8103	398	444	1.0675	45	155		56	195			No hits found
sw02634	2751	3550	0.7829	3300	3277	1.0193	2172	2413	1.0213	1593	3168	0.6045		gi|11863542|emb|CAC18800.1| AKAP550 [Drosophila melanogaster]
sw02635	324	409	0.9577	379	454	0.9895	88	262		44	173
sw02641	3014	3928	0.7292	3114	2998	0.9971	1747	1469	1.187	918	1912	0.5807		No hits found
sw02643	243	308		485	461	1.2193	68	216		38	175			gi|456984|gb|AAB29457.1| ryanodine receptor, calcium release channel [Drosophila melanogaster, Peptide, 5126 aa] ryanodine receptor homologue [Drosophila melanogaster]
sw02650	252	431	0.775	384	525	0.8867	248	295		162	329			No hits found
sw02651	532	507	1.1068	359	438	0.9977	261	334		35	414	0.2082
sw02652	254	213		230	260		315	232		341	460	1.1114		No hits found
sw02654	583	671	1.0498	1018	846	1.3254	76	202		130	317			gi|34328063|ref|NP_058672.1| glutamate receptor, metabotropic 1 [Mus musculus] metabotropic glutamate receptor type 1 [Mus musculus] Metabotropic glutamate receptor 1 precursor (mGluR1)
sw02655	247	316		388	400	1.1767	80	242		51	137			gi|73972781|ref|XP_532130.2| PREDICTED: similar to dynein, axonemal, heavy chain 8 [Canis familiaris]
sw02656	370	389		400	402	1.1215	93	188		96	253			gi|71000291|ref|XP_754840.1| nucleolin protein Nsr1 [Aspergillus fumigatus Af293] nucleolin protein (Nsr1), putative [Aspergillus fumigatus Af293]
sw02661	551	661	0.9324	489	617	0.9381	335	485	0.8666	284	376			No hits found
sw02664	812	727	1.0858	677	614	1.0923	787	680	1.2361	839	666	1.5866
sw02667	258	496	0.6044	199	269		116	159		78	241			gi|66555679|ref|XP_396164.2| PREDICTED: similar to kinesin family member 3A [Apis mellifera]
sw02673	421	608	0.7533	426	539	0.9404	210	174		89	227
sw02674	360	318		404	440	1.0582	42	177		53	179
sw02676	214	275		431	348	1.2855	31	162		41	183
sw02678	506	338	1.8063	1747	623	2.6912	2439	991	2.5609	3719	246	18.6199		No hits found
sw02684	216	348		220	693	0.3689	92	588	0.2374	9	282
sw02688	671	610	1.0646	522	494	1.0548	335	196		229	471	0.7819
sw02693	979	1410	0.8199	982	1264	1.0193	1402	1494	0.9535	561	794	0.9711		gi|54642987|gb|EAL31731.1| GA22112-PA [Drosophila pseudoobscura]
sw02697	1124	1712	0.7678	916	1185	1.0243	547	950	0.6208	184	1419	0.2014		No hits found
sw02700	216	373		240	273		478	256	2.4169	384	246			gi|21355331|ref|NP_648315.1| CG3529-PB [Drosophila melanogaster] GH05942p [Drosophila melanogaster] CG3529-PB [Drosophila melanogaster]
sw02701	296	325		226	419	0.9601	157	250		80	164
sw02703	7582	8572	0.7853	8120	6820	1.307	7605	6894	1.0446	4949	7718	0.4956		No hits found
sw02708	349	521	0.9205	372	520	0.9869	67	184		109	343
sw02717	808	994	0.994	790	886	1.1633	883	762	1.1684	421	843	0.6767
sw02730	390	486	1.0779	196	254		58	185		29	142			gi|29134779|dbj|BAC66140.1| projectin [Procambarus clarkii]
sw02733	1398	1375	1.137	596	841	0.9351	810	596	1.4043	434	1005	0.5284		gi|66514031|ref|XP_623655.1| PREDICTED: similar to plasma membrane calcium ATPase PMCA3, partial [Apis mellifera]
sw02738	821	1208	0.7805	1614	1878	0.8877	751	774	1.091	542	848	0.7563		No hits found
sw02741	479	610	1.0073	670	727	1.1636	538	497	1.1782	605	406	1.82		No hits found
sw02743	381	459	0.956	194	275		39	174		52	169
sw02748	322	468	0.8356	431	450	1.1314	165	319		82	254
sw02755	767	701	1.1028	460	488	1.1367	447	475	1.1816	728	697	1.2614
sw02760	672	566	1.2387	1203	771	1.4716	2191	695	3.0123	3550	417	12.1356
sw02766	457	352	1.5855	414	705	0.7498	138	316		305	293
sw02767	4163	4344	0.7354	5534	5751	0.8779	6168	5807	1.0538	3570	2124	1.6377
sw02769	671	774	0.9486	983	897	1.2867	533	508	1.2022	366	819	0.5431
sw02773	265	380		294	449	0.9185	27	195		46	201
sw02774	871	1012	0.9424	1165	1069	1.1874	649	957	0.778	817	1151	0.8758
sw02775	363	477	0.8622	299	454	0.8703	401	708	0.639	305	513	0.8818		gi|72013764|ref|XP_784928.1| PREDICTED: similar to Translation initiation factor eIF-2B epsilon subunit (eIF-2B GDP-GTP exchange factor) [Strongylocentrotus purpuratus]
sw02777	221	286		335	411	1.1534	44	191		67	162			gi|70907198|gb|AAZ15240.1| reverse transcriptase [Aedes aegypti]
sw02781	420	331	1.5426	298	522	0.7736	259	186		287	335
sw02789	9756	7076	1.2581	12169	11293	0.9765	12181	5279	2.3644	11797	8558	1.1601
sw02792	271	329		440	509	0.9937	31	228		58	218			gi|2407794|gb|AAB70755.1| aminopeptidase N [Plutella xylostella]
sw02795	318	367		507	538	1.133	73	211		86	199
sw02796	2780	1994	1.2712	4130	3703	1.0015	2880	3531	0.8224	2664	2435	1.0613		gi|46395316|dbj|BAD16595.1| DIC-2 [Lymnaea stagnalis]
sw02797	182	301		323	425	1.0064	84	173		104	197			gi|37196912|dbj|BAC97793.1| furin-like convetase [Bombyx mori]
sw02798	500	626	0.9407	508	603	1.0157	234	410	0.7733	212	318			gi|19922104|ref|NP_610794.1| CG8818-PA [Drosophila melanogaster] GH04007p [Drosophila melanogaster] CG8818-PA [Drosophila melanogaster]
sw02802	257	405	0.8652	348	485	0.9324	252	527	0.6677	221	423	0.8768
sw02803	371	432	1.0351	363	436	1.039	42	187		44	179			gi|4165194|emb|CAA08807.1| Pol protein [Drosophila melanogaster]
sw02807	279	415	0.8373	481	611	0.9158	54	232		52	205
sw02810	52495	43800	0.9952	33344	46862	0.6155	28252	26544	1.0812	57727	36108	1.057
sw02811	396	508	0.9213	598	616	1.1213	125	266		130	284
sw02819	242	474	0.6255	242	323		240	345		198	263			gi|66532600|ref|XP_392743.2| PREDICTED: similar to phospholipase A2, activating protein [Apis mellifera]
sw02822	164	269		199	425	0.6739	75	218		62	186			gi|62859517|ref|NP_001016079.1| transmembrane protein 19 [Xenopus tropicalis]
sw02823	266	349		273	440	0.7533	237	412	0.8162	275	330
sw02827	192	310		515	491	1.2171	30	207		34	126
sw02829	425	618	0.8744	600	684	1.0508	317	512	0.7724	284	423	1.1324		gi|34860697|ref|XP_230848.2| PREDICTED: similar to Neuralized-like protein 2 [Rattus norvegicus]
sw02832	363	451	0.9069	489	475	1.1609	39	305		122	290			gi|3721647|dbj|BAA33578.1| a part of a retrotransposon [Bombyx mandarina]
sw02833	333	380		359	433	1.0242	131	273		179	371			gi|30387346|ref|NP_848425.1| unknown [Choristoneura fumiferana MNPV] unknown [Choristoneura fumiferana MNPV]
sw02840	214	302		357	454	0.8763	38	232		46	211
sw02841	293	401	0.9556	369	565	0.8074	177	370		342	545	0.9392
sw02842	372	428	1.1122	615	591	1.2092	402	355	1.2833	287	484	0.8843
sw02843	1281	1028	1.1692	1122	1257	0.9118	874	601	1.7287	857	807	1.3105
sw02848	680	708	0.9645	579	786	0.7454	588	939	0.7095	457	608	1.053		gi|55244061|gb|EAA05879.2| ENSANGP00000020097 [Anopheles gambiae str. PEST] ENSANGP00000020097 [Anopheles gambiae str. PEST]
sw02855	297	399		431	486	0.9976	86	290		76	220			gi|72090531|ref|XP_792772.1| PREDICTED: similar to zn-finger, CCHC type and RNA-directed DNA polymerase and Integrase, catalytic domain containing protein family member (1E419) [Strongylocentrotus purpuratus]
sw02865	6564	5073	1.0583	6796	5943	1.0761	6446	4578	1.4194	4658	5212	0.8824
sw02870	768	732	1.2002	729	754	1.0307	707	790	0.9802	1136	668	2.1891		gi|72084058|ref|XP_790678.1| PREDICTED: similar to vacuolar protein sorting 54 isoform 1 [Strongylocentrotus purpuratus]
sw02882	998	1018	1.182	730	557	1.8948	749	422	1.8431	524	897	0.7384		gi|12597214|dbj|BAB21511.1| ORF of non-LTR retrotransposon~composed of two sections ORF1 and ORF2 separated by translational frameshift [Bombyx mori]
sw02884	940	1112	1.0124	1009	1168	1.1299	881	711	1.2583	3013	1165	2.3703
sw02887	494	521	1.3078	322	658	0.817	232	896	0.3336	21	474	0.163		gi|72014020|ref|XP_783244.1| PREDICTED: similar to cytochrome P450, family 4, subfamily v, polypeptide 2 [Strongylocentrotus purpuratus]
sw02889	862	981	1.039	1106	1310	1.0846	355	421	1.0369	227	412	0.9167
sw02890	362	413	1.2567	428	598	1.0985	944	849	1.119	413	411	1.3536		gi|18254413|gb|AAL66754.1| putative copia-like retrotransposon Hopscotch polyprotein [Zea mays]
sw02892	20220	13607	1.2119	19488	24318	0.7894	17096	22112	0.7989	29057	8267	2.413		gi|8572569|ref|NP_059474.1| NADH dehydrogenase subunit 1 [Bombyx mori] NADH dehydrogenase 1 [Bombyx mori] NADH dehydrogenase 1 [Bombyx mori]
sw02894	830	820	1.2466	782	815	1.3454	1115	697	1.6124	876	747	1.3595		gi|44984881|gb|AAS53705.1| AFR334Wp [Ashbya gossypii ATCC 10895] AFR334Wp [Eremothecium gossypii]
sw02901	408	461	1.2547	306	494	0.9837	275	432	0.7242	266	396			gi|7861545|dbj|BAA95684.1| NADPH cytochrome P450 reductase [Bombyx mori]
sw02904	921	1237	0.85	688	1007	0.8108	842	895	0.9448	1181	666	2.0484		gi|76629295|ref|XP_869961.1| PREDICTED: similar to multiple coagulation factor deficiency 2 [Bos taurus]
sw02910	335	482	0.9766	566	858	0.8778	410	566	0.9477	282	410	1.1284		gi|66554066|ref|XP_625006.1| PREDICTED: similar to superoxide dismutase copper chaperone, partial [Apis mellifera]
sw02912	6133	6297	0.8994	6677	7703	0.8886	5785	6944	0.8445	3921	5505	0.6518		gi|1079556|gb|AAA82046.1| dShc
sw02921	1054	1170	1.0333	929	1589	0.7273	1240	1965	0.5748	1180	865	1.3831		gi|76641811|ref|XP_616687.2| PREDICTED: similar to Clathrin coat assembly protein AP17 (Clathrin coat associated protein AP17) (Plasma membrane adaptor AP-2 17 kDa protein) (Clathrin assembly protein 2 small chain) [Bos taurus]
sw02922	280	478	0.842	213	290		231	255		252	250			gi|68427239|ref|XP_692360.1| PREDICTED: similar to laminin A precursor (65.4 kD) (3N913), partial [Danio rerio]
sw02923	5985	4912	1.0402	6003	6434	0.9651	4380	6182	0.7459	4843	5796	0.685		gi|18001260|gb|AAL55291.1| CKII beta binding protein 2 [Homo sapiens]
sw02925	2289	2848	0.8158	2073	2812	0.8651	3064	3178	0.9169	407	1752	0.2811		gi|55584202|gb|AAV52386.1| microtubule-associated protein tau [Pongo pygmaeus] Microtubule-associated protein tau
sw02928	698	828	0.9323	1056	838	1.5168	1183	676	1.8031	183	729	0.2905		gi|6691137|gb|AAF24503.1| mab-21 [Drosophila melanogaster]
sw02930	784	894	1.0346	621	801	0.8889	241	485	0.5718	382	571	0.8681		gi|48098095|ref|XP_392005.1| PREDICTED: similar to ENSANGP00000019468 [Apis mellifera]
sw02931	767	870	0.8967	513	728	0.8605	318	582	0.7209	302	495	0.7796		gi|117622|sp|P11734|CU08_LOCMI Cuticle protein 8 (LM-8) (LM-ACP 8)
sw02933	401	405	1.3539	248	419	0.9384	208	184		220	309
sw02934	346	826	0.523	135	843	0.192	159	351		146	312			gi|50370224|gb|AAH76913.1| MGC89088 protein [Xenopus tropicalis] MGC89088 protein [Xenopus tropicalis]
sw02936	337	428	0.9656	216	292		69	194		37	203			gi|66505126|ref|XP_394371.2| PREDICTED: similar to pleckstrin homology-like domain, family B, member 2 [Apis mellifera]
sw02939	731	860	0.8676	454	571	0.9996	679	695	1.0856	448	422	1.3103		gi|24475545|dbj|BAC22695.1| xylosylprotein beta4-galactosyltransferase [Drosophila melanogaster]
sw02940	372	515	0.8556	398	499	0.9565	287	371		384	436	1.156
sw02942	538	838	0.7773	516	660	0.932	433	500	1.0208	465	604	0.9676		gi|66550721|ref|XP_395506.2| PREDICTED: similar to transcription factor shn - fruit fly (Drosophila melanogaster), partial [Apis mellifera]
sw02944	451	649	0.7793	583	766	0.8373	997	1105	0.835	346	288			gi|2257629|dbj|BAA21483.1| Bm cdc2 [Bombyx mori]
sw02946	9776	7658	1.0688	12666	6555	1.606	8083	4035	2.0257	1427	9327	0.1369		gi|22474512|dbj|BAC10617.1| KETTIN [Bombyx mori] BMKETTIN [Bombyx mori]
sw02948	7159	5271	1.0721	9515	9794	0.8225	7475	7201	1.0045	11706	4268	2.2826		gi|55641779|ref|XP_510278.1| PREDICTED: similar to chromosome 15 open reading frame 24; chromosome 15 hypothetical ATG/GTP binding protein [Pan troglodytes]
sw02950	295	395		267	434	0.8738	155	258		229	202
sw02952	4913	3165	1.2773	5729	4192	1.1522	4876	2991	1.5149	3285	2924	1.0382		gi|3023155|gb|AAD13353.1| kinesin heavy chain [Expression vector pPK121] kinesin heavy chain
sw02955	344	539	0.6536	330	573	0.7007	64	244		37	324			gi|2970687|gb|AAC06038.1| beta-glucosidase precursor [Spodoptera frugiperda]
sw02958	261	351		341	444	1.0294	26	145		39	179			gi|73961798|ref|XP_855683.1| PREDICTED: similar to oxysterol-binding protein-like 1A isoform B isoform 2 [Canis familiaris]
sw02969	335	463	0.8811	244	411	0.8672	94	249		89	262
sw02970	840	916	1.0159	718	675	1.2095	500	403	1.611	795	992	1.014		gi|68697234|emb|CAJ14145.1| tensin [Anopheles gambiae]
sw02971	477	520	1.0185	519	772	0.793	641	399	1.967	418	515	1.1601
sw02976	760	925	0.8405	1176	1239	0.9151	475	737	0.6993	305	1200	0.3074		gi|20070698|gb|AAH26131.1| Solute carrier family 7 (cationic amino acid transporter, y+ system), member 5 [Mus musculus] solute carrier family 7 (cationic amino acid transporter, y+ system), member 5 [Mus musculus]
sw02977	847	1162	0.837	867	1219	0.7997	782	976	0.864	326	1588	0.2308		gi|66550796|ref|XP_395404.2| PREDICTED: similar to CG3297-PA, isoform A [Apis mellifera]
sw02983	15403	9637	1.4137	16572	15635	0.9585	9539	13206	0.8614	11011	11176	0.8583		gi|11967847|emb|CAC19413.1| ribosomal protein L31 [Heliothis virescens] ribosomal protein L31 [Spodoptera frugiperda] 60S ribosomal protein L31 60S ribosomal protein L31
sw02984	782	788	1.0219	528	638	0.9148	611	673	1.0301	233	538	0.7111		gi|440144|emb|CAA52155.1| integrin [Drosophila melanogaster]
sw02987	399	468	1.0079	648	708	1.029	76	188		84	160			gi|87248351|gb|ABD36228.1| mitochondrial aldehyde dehydrogenase [Bombyx mori]
sw02989	383	491	1.0361	233	352		195	226		226	367
sw02992	11651	8890	1.0445	16514	13773	0.9715	12219	11634	1.1128	27828	3981	5.5795		gi|22474506|dbj|BAC10611.1| FK506-binding protein [Bombyx mori] FK506-binding protein [Bombyx mori]
sw02998	365	358		261	349		355	211		605	454	1.9196		gi|1209648|gb|AAC47002.1| protein tyrosine phosphatase DLAR protein tyrosine phosphatase (DLAR) precursor
sw03003	380	427	1.0698	283	337		179	395		106	361			gi|87248419|gb|ABD36262.1| larval cuticle protein [Bombyx mori]
sw03008	449	463	1.0919	511	611	0.874	327	357		183	421	0.8077		gi|2935153|gb|AAC05080.1| odd Oz product [Drosophila melanogaster]
sw03015	257	323		288	440	0.7937	44	287		40	179			gi|48116262|ref|XP_393186.1| PREDICTED: similar to CG6322-PA [Apis mellifera]
sw03016	2943	1831	1.4194	3322	2989	1.0009	1954	3462	0.6455	1957	2605	0.862		gi|70984713|ref|XP_747863.1| peptidyl prolyl cis-trans isomerase [Aspergillus fumigatus Af293] peptidyl prolyl cis-trans isomerase (CypC), putative [Aspergillus fumigatus Af293]
sw03021	677	1290	0.6035	988	957	1.1492	868	586	1.7555	69	901	0.1838		gi|38679391|gb|AAR26517.1| antennal cytochrome P450 CYP4 [Mamestra brassicae]
sw03023	1159	1495	0.7392	890	1165	0.7973	906	1323	0.8192	805	1051	0.8234		gi|17543332|ref|NP_502812.1| glutamyl(E)/glutaminyl(Q) tRNA Synthetase family member (ers-1) [Caenorhabditis elegans] Hypothetical protein Y41E3.4 [Caenorhabditis elegans] Probable glutaminyl-tRNA synthetase (Glutamine--tRNA ligase) (GlnRS)
sw03024	355	417	0.9645	363	453	0.9177	82	321		82	249			gi|66518336|ref|XP_391857.2| PREDICTED: similar to Na+/H+ antiporter [Apis mellifera]
sw03029	3798	3524	0.9758	5013	4620	1.0047	3861	4533	0.9123	4812	3867	1.1978
sw03030	405	535	0.9454	981	963	1.1038	594	845	0.7855	408	243	2.4549		gi|7735|emb|CAA36998.1| claret segregational product, claret disjunctin [Drosophila melanogaster] kinesin related protein
sw03031	279	405	0.7809	385	479	0.9593	46	243		34	170
sw03033	3214	2908	1.0243	3196	3620	0.8604	2285	2816	0.8663	2238	4821	0.5031		gi|13477303|gb|AAH05125.1| NOL10 protein [Homo sapiens] Nucleolar protein 10
sw03034	1120	1309	0.9554	1862	1686	1.1308	1728	1596	1.1186	1631	1227	1.4356		gi|62859171|ref|NP_001016978.1| archain [Xenopus tropicalis] archain 1 [Xenopus tropicalis]
sw03035	266	311		371	433	1.0381	36	214		39	149
sw03036	2453	2523	0.8373	3088	2744	0.9923	2548	2731	0.9975	1861	2279	0.9868		gi|87248313|gb|ABD36209.1| DnaJ-like protein isoform A [Bombyx mori]
sw03040	516	517	1.0673	643	559	1.203	1158	616	2.0263	52	292			gi|62655984|ref|XP_213277.3| PREDICTED: similar to novel protein [Rattus norvegicus]
sw03043	1853	2518	0.6587	1427	1620	0.8754	1887	2177	0.924	1342	1609	0.9343		gi|72074391|ref|XP_796462.1| PREDICTED: similar to Alpha-centractin (Centractin) (Centrosome-associated actin homolog) (Actin-RPV) (ARP1) [Strongylocentrotus purpuratus]
sw03046	371	418	1.074	437	565	0.8916	246	470	0.6285	238	358			gi|25012393|gb|AAN71305.1| RE11282p [Drosophila melanogaster]
sw03048	4879	3649	1.0504	5074	2283	2.0629	3727	2105	1.8878	739	5285	0.1239		gi|18700461|dbj|BAB85198.1| Titin-like protein [Bombyx mori]
sw03051	8848	5616	1.1524	8019	7761	0.9165	4718	8239	0.6525	32169	3735	6.5282		gi|73971831|ref|XP_854862.1| PREDICTED: similar to Glyoxylate reductase/hydroxypyruvate reductase [Canis familiaris]
sw03055	1671	1947	0.7746	1809	1932	0.9156	1054	1405	0.8164	1427	1876	0.8358
sw03058	3908	3475	1.1039	3993	4089	0.9147	3220	4091	0.8328	3240	4756	0.7311		gi|72144546|ref|XP_794604.1| PREDICTED: similar to mitochondrial ribosomal protein L19 [Strongylocentrotus purpuratus]
sw03059	2282	2133	0.9183	1514	2001	0.7149	1610	1834	0.9815	1609	2576	0.6378		gi|87248659|gb|ABD36382.1| glycyl-tRNA synthetase [Bombyx mori]
sw03062	190	325		261	418	0.7883	200	369		116	331			gi|27819886|gb|AAO24991.1| LP05663p [Drosophila melanogaster]
sw03068	382	356		357	415	0.9232	47	211		142	225
sw03070	351	491	0.9103	401	433	1.0697	232	289		137	285			gi|57909379|ref|XP_552532.1| ENSANGP00000025520 [Anopheles gambiae str. PEST] ENSANGP00000025520 [Anopheles gambiae str. PEST]
sw03072	455	437	1.0609	187	234		34	184		66	244
sw03075	1095	479	2.7967	3361	1262	3.3595	280	2108	0.1689	58	2538	0.0474		gi|49532924|dbj|BAD26697.1| troponin C type IIIa-like protein [Plutella xylostella]
sw03076	252	390		275	447	1.0057	754	767	0.9838	747	459	2.0403		gi|4104617|gb|AAD02091.1| receptor tyrosine kinase [Drosophila melanogaster]
sw03078	8964	8988	0.9411	9863	12202	0.8832	7728	8448	0.9691	6859	12685	0.5036		gi|45709905|gb|AAH67632.1| Rrs1 protein [Danio rerio]
sw03086	176	389		42	761	0.1394	41	171		18	256			gi|28316894|gb|AAO39469.1| RH04286p [Drosophila melanogaster]
sw03089	308	568	0.7595	115	244		167	246		95	445	0.4455
sw03092	2149	1560	1.5217	2359	2242	1.1733	1718	1043	1.5799	1357	1098	1.3484		gi|2564053|dbj|BAA22946.1| Bm trachealess [Bombyx mori]
sw03094	1030	994	1.2249	897	1202	0.9194	1269	1291	1.1624	691	890	1.053
sw03095	745	808	1.1512	807	978	1.0668	1205	1227	1.0685	796	743	1.2671		gi|13937775|gb|AAH06986.1| Hypothetical protein FLJ11016 [Homo sapiens] hypothetical protein LOC55285 [Homo sapiens]
sw03098	551	1057	0.6248	620	546	1.5634	325	297		52	790	0.1337		gi|24653933|ref|NP_611056.2| CG30089-PA [Drosophila melanogaster] CG30089-PA [Drosophila melanogaster]
sw03099	874	1078	0.9786	891	1293	0.8756	1006	1365	0.8006	3031	1181	2.6526		gi|87248481|gb|ABD36293.1| cytochrome b5 [Bombyx mori]
sw03100	237	303		271	366		240	457	0.6593	292	222			gi|55589078|ref|XP_514108.1| PREDICTED: similar to Chromosome 1 open reading frame 37 [Pan troglodytes]
sw03101	535	834	0.8168	283	506	0.9006	294	474	0.6919	76	826	0.1778		gi|24652852|ref|NP_725091.1| CG13188-PA, isoform A [Drosophila melanogaster] CG13188-PA, isoform A [Drosophila melanogaster]
sw03106	1799	1681	1.1337	2050	2823	0.8027	1412	2260	0.646	2228	2494	0.92		gi|24642023|ref|NP_572974.1| CG14407-PA [Drosophila melanogaster] RH03087p [Drosophila melanogaster] CG14407-PA [Drosophila melanogaster]
sw03107	346	392		376	511	1.0414	256	505	0.686	129	284			gi|8250179|emb|CAB93523.1| PPP4R2-related protein [Drosophila melanogaster]
sw03108	13228	10012	1.0577	17429	14935	1.0242	14989	11931	1.0987	15571	9742	1.3489		gi|67463972|pdb|1Z6O|X Chain X, Crystal Structure Of Trichoplusia Ni Secreted Ferritin Chain W, Crystal Structure Of Trichoplusia Ni Secreted Ferritin Chain V, Crystal Structure Of Trichoplusia Ni Secreted Ferritin Chain U, Crystal Structure Of Trichoplusia Ni Secreted Ferritin Chain T, Crystal Structure Of Trichoplusia Ni Secreted Ferritin Chain S, Crystal Structure Of Trichoplusia Ni Secreted F…
sw03109	1442	1405	1.1442	1592	1799	1.0475	2438	1694	1.4089	6396	1213	3.953		gi|76618319|ref|XP_603752.2| PREDICTED: similar to Placental protein 11 precursor (PP11) [Bos taurus]
sw03110	693	1068	0.7924	730	1339	0.7006	707	1116	0.7099	1682	750	2.449		gi|66828395|ref|XP_647552.1| 4-aminobutyrate transaminase [Dictyostelium discoideum] 4-aminobutyrate transaminase [Dictyostelium discoideum]
sw03114	290	445	0.9301	321	453	1.0438	149	279		334	403	1.1861		gi|66507232|ref|XP_392340.2| PREDICTED: similar to guanine nucleotide exchange factor [Apis mellifera]
sw03115	229	426	0.7377	150	255		145	208		148	157
sw03118	188	443	0.6703	291	547	0.805	268	430	0.8188	283	331			gi|62530958|gb|AAH93455.1| Mcm5-prov protein [Xenopus tropicalis]
sw03119	342	355		216	383		850	282	3.5029	2552	777	3.4103
sw03124	1785	149	14.084	45	160		380	119		19	177			gi|28850409|gb|AAO53177.1| similar to Dictyostelium discoideum (Slime mold). Adenylyl cyclase
sw03125	382	428	1.2177	327	468	1.0231	499	226	2.7657	291	474	0.8643		gi|72167287|ref|XP_796805.1| PREDICTED: similar to Coatomer alpha subunit (Alpha-coat protein) (Alpha-COP) (HEPCOP) (HEP-COP) [Strongylocentrotus purpuratus]
sw03126	2797	2492	1.1282	2746	2403	1.1681	1163	1645	0.7128	1580	2505	0.6244
sw03128	251	456	0.6918	354	398		145	259		97	323			gi|73991361|ref|XP_542870.2| PREDICTED: similar to GTPase activating Rap/RanGAP domain-like 1 isoform 2 [Canis familiaris]
sw03131	885	944	0.9377	611	1015	0.7063	550	909	0.7039	586	692	0.969		gi|66519017|ref|XP_393258.2| PREDICTED: similar to gARPX [Apis mellifera]
sw03132	11538	9558	0.9231	15140	14389	0.8191	12502	15236	0.7532	9914	9793	0.7396		gi|63606972|ref|XP_618804.1| PREDICTED: similar to Cytochrome c oxidase polypeptide VIIc, mitochondrial precursor [Mus musculus] PREDICTED: similar to Cytochrome c oxidase polypeptide VIIc, mitochondrial precursor [Mus musculus]
sw03133	234	407	0.8332	138	363		105	276		74	229			gi|82890404|ref|XP_131051.4| PREDICTED: sorting nexin family member 27 [Mus musculus] PREDICTED: similar to PDZ protein Mrt1 [Mus musculus]
sw03136	514	585	0.983	539	537	1.1229	486	413	1.1864	328	728	0.5395		gi|78366543|ref|ZP_00836822.1| Peptidyl-dipeptidase A [Shewanella sp. PV-4] Peptidyl-dipeptidase A [Shewanella sp. PV-4]
sw03137	317	418	0.9814	333	418	1.0862	141	168		186	281			gi|3953607|dbj|BAA34731.1| MCM3 [Drosophila melanogaster]
sw03139	3510	2347	1.2966	3359	4150	0.7637	2196	2763	0.8535	2500	3568	0.6347		gi|19921958|ref|NP_610554.1| CG1381-PA [Drosophila melanogaster] LD47064p [Drosophila melanogaster] CG1381-PA [Drosophila melanogaster]
sw03140	399	660	0.669	494	639	0.8429	592	800	0.8053	359	609	0.8011		gi|76632367|ref|XP_868926.1| PREDICTED: similar to chromosome 10 open reading frame 97 isoform 2 [Bos taurus]
sw03141	2301	3104	0.7144	3183	2772	1.1887	5095	2365	2.1807	1463	2529	0.5972		gi|66504238|ref|XP_394314.2| PREDICTED: similar to ENSANGP00000014351 [Apis mellifera]
sw03143	809	834	0.9384	964	495	2.2379	1905	345	4.9182	21	385			gi|23096118|dbj|BAC16225.1| cuticle protein [Bombyx mori]
sw03146	263	474	0.7578	279	392		92	302		29	471	0.1584		gi|66507338|ref|XP_392343.2| PREDICTED: similar to glucosamine--fructose-6-phosphate aminotransferase [Apis mellifera]
sw03149	263	400	0.8794	214	325		84	164		44	134			gi|66524780|ref|XP_623728.1| PREDICTED: similar to RING finger protein 19 (Dorfin) (Double ring-finger protein) (p38 protein) [Apis mellifera]
sw03150	9654	8272	0.9828	12134	9312	1.1118	9002	8605	1.0567	25192	3020	6.3526
sw03151	408	501	0.8578	161	269		83	187		169	304			gi|66549371|ref|XP_393553.2| PREDICTED: similar to ENSANGP00000020909 [Apis mellifera]
sw03153	3022	3482	0.7958	4664	3833	1.2434	4545	3784	1.2339	12733	3075	3.5002		gi|54289250|gb|AAV31915.1| glutamine synthetase [Aedes aegypti]
sw03155	2617	2287	1.0157	1988	2454	0.8106	1372	2075	0.7003	1338	2796	0.532		gi|87248277|gb|ABD36191.1| BTB/POZ domain containing protein [Bombyx mori]
sw03157	365	513	0.8538	361	511	0.9502	396	328		246	371			gi|60677941|gb|AAX33477.1| RE04051p [Drosophila melanogaster]
sw03159	1432	1604	0.8253	2264	2099	1.0406	1690	2310	0.7823	1163	887	1.6134		gi|76661455|ref|XP_870083.1| PREDICTED: similar to Myosin-9 (Myosin heavy chain, nonmuscle IIa) (Nonmuscle myosin heavy chain IIa) (NMMHC II-a) (NMMHC-IIA) (Cellular myosin heavy chain, type A) (Nonmuscle myosin heavy chain-A) (NMMHC-A) isoform 2 [Bos taurus]
sw03160	1695	1738	0.9349	2387	2347	0.9515	1503	1957	0.7993	1011	2303	0.4419		gi|85857490|gb|ABC86281.1| RE09672p [Drosophila melanogaster]
sw03164	350	379		763	728	1.0451	242	276		222	429	0.7674		gi|55646579|ref|XP_511882.1| PREDICTED: similar to sperm protein SSP411; transcript increased in spermiogenesis 78 [Pan troglodytes]
sw03166	401	474	1.0577	286	385		110	278		121	261			gi|51859033|gb|AAH81478.1| PQ loop repeat containing 3 [Danio rerio] PQ loop repeat containing 3 [Danio rerio]
sw03170	4355	3559	1.1572	4170	4481	0.918	2178	2765	0.8861	3800	5243	0.7505		gi|72141411|ref|XP_793660.1| PREDICTED: similar to RIO kinase 1 [Strongylocentrotus purpuratus]
sw03172	1475	1370	1.0382	1972	1243	1.5382	1417	891	1.9023	1351	1417	1.0193		gi|63100580|gb|AAH95137.1| Zgc:110023 protein [Danio rerio]
sw03180	421	660	0.7109	578	822	0.7523	270	490	0.6333	198	624	0.5274
sw03181	214	295		384	431	1.1421	47	134		37	158			gi|24654017|ref|NP_611084.2| CG8414-PA [Drosophila melanogaster] CG8414-PA [Drosophila melanogaster]
sw03183	1761	1296	1.4152	1496	1632	0.9461	861	998	1.009	1159	1353	1.0133		gi|66550683|ref|XP_394925.2| PREDICTED: similar to GA20653-PA [Apis mellifera]
sw03188	1623	1381	1.1238	1889	1958	0.9105	1641	1165	1.4616	950	1407	0.8379		gi|66734432|gb|AAY53605.1| tetraspanin family protein [Branchiostoma belcheri tsingtaunese]
sw03192	972	1060	0.9148	1267	1684	0.7146	529	947	0.6884	1680	677	3.3304		gi|400673|sp|P31420|OMBP_MANSE Ommochrome-binding protein precursor (OBP) (YCP) ommochrome-binding protein
sw03194	331	407	1.0876	595	777	0.9126	58	196		41	194
sw03195	2015	1561	1.1803	1587	1709	0.9627	1230	1271	1.2283	1781	2023	0.8421		gi|83766725|dbj|BAE56865.1| unnamed protein product [Aspergillus oryzae]
sw03198	365	331		522	577	1.1194	1771	1523	1.2794	2507	236	14.2627		gi|57972112|ref|XP_564944.1| ENSANGP00000027953 [Anopheles gambiae str. PEST] ENSANGP00000027953 [Anopheles gambiae str. PEST]
sw03199	1465	1312	1.0621	1854	1807	1.0598	1237	1894	0.7901	1508	1327	1.1266		gi|5031597|ref|NP_005710.1| actin related protein 2/3 complex subunit 3 [Homo sapiens] PREDICTED: similar to Actin-related protein 2/3 complex subunit 3 (ARP2/3 complex 21 kDa subunit) (p21-ARC) isoform 1 [Canis familiaris] Actin related protein 2/3 complex, subunit 3, 21kDa [Bos taurus] Actin related protein 2/3 complex subunit 3 [Homo sapiens] ARPC3 [Homo sapiens] p21-Arc [Homo sapiens] Actin r…
sw03201	411	501	1.063	377	576	0.8303	397	352		284	434	1.0992		gi|18535620|gb|AAL71873.1| ultrabithorax [Junonia coenia] Homeotic protein ultrabithorax (JcUbx)
sw03202	421	587	0.9357	517	638	1.0242	408	547	0.9879	170	375
sw03203	359	397		603	573	1.1969	99	271		134	220
sw03204	1500	1215	1.1687	1972	1704	1.0931	1250	1580	0.8872	1553	1087	2.0222		gi|73977144|ref|XP_861870.1| PREDICTED: similar to Uroporphyrinogen decarboxylase (URO-D) (UPD) isoform 4 [Canis familiaris]
sw03205	235	289		295	409	0.996	46	171		50	207			gi|66523721|ref|XP_392019.2| PREDICTED: similar to ENSANGP00000001513 [Apis mellifera]
sw03207	2792	2054	1.2328	3895	3262	1.1356	2640	2816	1.1304	3008	1648	1.8684		gi|90309026|gb|ABA43638.2| glyceraldehyde-3-phosphate dehydrogenase [Bombyx mori]
sw03208	509	621	0.8767	431	480	1.0098	216	431	0.7216	217	344			gi|34098381|sp|O54916|REPS1_MOUSE RalBP1-associated Eps domain-containing protein 1 (RalBP1-interacting protein 1) RalBP1 associated Eps domain containing protein [Mus musculus] RalBP1-associated EH domain protein Reps1 [Mus musculus]
sw03209	676	694	1.1481	383	664	0.7136	277	396		300	515	0.9628		gi|68402912|ref|XP_693968.1| PREDICTED: similar to Carbohydrate sulfotransferase 11 (Chondroitin 4-O-sulfotransferase 1) (Chondroitin 4-sulfotransferase 1) (C4ST) (C4ST-1) (C4S-1) [Danio rerio]
sw03212	275	404	0.7992	170	313		112	279		126	373
sw03214	406	356	1.595	519	363	1.9629	477	227	2.5702	104	325			gi|62666324|ref|XP_228320.3| PREDICTED: similar to Blimp-1 [Rattus norvegicus]
sw03215	324	432	0.8977	284	397		108	235		67	198			gi|3983137|gb|AAC83821.1| Lis1 homolog [Drosophila melanogaster]
sw03217	207	323		264	283		146	218		2871	254	10.9656		gi|66503826|ref|XP_392190.2| PREDICTED: similar to RH44796p [Apis mellifera]
sw03219	255	293		431	401	1.2802	47	209		162	188			gi|62660962|ref|XP_344278.2| PREDICTED: similar to Ankyrin repeat and SOCS box-containing protein 3 [Rattus norvegicus]
sw03220	360	359		772	517	1.5732	721	881	0.9096	1236	310	6.9624
sw03223	282	377		411	370	1.3446	31	181		24	157			gi|26190489|gb|AAN17506.1| laccase 1 [Manduca sexta]
sw03229	263	394		375	414	1.1051	143	198		129	197			gi|54633178|dbj|BAD66825.1| KIAA1149 splice variant 1 [Homo sapiens]
sw03230	2195	2450	0.9414	2235	2069	1.0985	857	967	0.9561	501	1970	0.317
sw03231	523	573	0.9371	473	564	0.9628	151	318		392	459	1.1949		gi|69949027|ref|ZP_00637087.1| Peptidyl-dipeptidase A [Shewanella frigidimarina NCIMB 400] Peptidyl-dipeptidase A [Shewanella frigidimarina NCIMB 400]
sw03233	6912	7751	0.7991	8987	6289	1.3125	8347	4407	1.8812	12665	4906	2.3192
sw03236	1192	1156	0.9359	1500	1486	0.8947	1015	1432	0.7058	1240	1292	1.0482		gi|72109917|ref|XP_793600.1| PREDICTED: similar to Rab geranylgeranyltransferase, beta subunit [Strongylocentrotus purpuratus]
sw03237	997	938	1.0945	437	497	1.0767	49	221		69	1733	0.0714		gi|47605409|sp|Q7M4E9|CUD3_SCHGR Endocuticle structural glycoprotein SgAbd-3
sw03241	699	1154	0.6545	1421	1823	0.7911	2210	4007	0.598	3106	488	6.4195		gi|34366066|emb|CAE18120.1| glycine cleavage system protein H [Crassostrea gigas]
sw03242	1150	1004	1.2118	1293	1422	0.9605	675	749	0.9316	780	1126	0.7379		gi|66523978|ref|XP_392006.2| PREDICTED: similar to ENSANGP00000004537 [Apis mellifera]
sw03243	1165	981	1.1097	1099	1440	0.7697	1312	1155	1.1981	1132	1030	1.3029		gi|72100663|ref|XP_798634.1| PREDICTED: similar to Protein phosphatase 2C gamma isoform (PP2C-gamma) (Protein phosphatase magnesium-dependent 1 gamma) (Protein phosphatase 1C) (Fibroblast growth factor inducible protein 13) (FIN13) [Strongylocentrotus purpuratus]
sw03244	6904	4539	1.1558	8775	6992	1.0422	5446	5820	1.0079	4731	6425	0.5494		gi|48114117|ref|XP_393169.1| PREDICTED: similar to ENSANGP00000009743 [Apis mellifera]
sw03245	246	420	0.7458	295	318		16	146		63	194			gi|82705213|ref|XP_726877.1| hypothetical protein PY06260 [Plasmodium yoelii yoelii str. 17XNL] hypothetical protein [Plasmodium yoelii yoelii]
sw03246	712	659	1.1837	557	746	0.8278	467	740	0.6858	555	948	0.6474		gi|21356467|ref|NP_649411.1| CG14450-PA [Drosophila melanogaster] RE67859p [Drosophila melanogaster] CG14450-PA [Drosophila melanogaster]
sw03250	215	357		371	400	1.0958	58	174		67	171
sw03252	669	655	0.9775	563	526	1.0519	122	202		104	284			gi|73996551|ref|XP_862497.1| PREDICTED: similar to tubulin, alpha 2 isoform 2 isoform 11 [Canis familiaris]
sw03256	332	353		498	511	0.9802	58	258		45	160			gi|55634563|ref|XP_508041.1| PREDICTED: similar to T-cell transcription factor-4 medium C-terminal isoform 1 [Pan troglodytes]
sw03257	317	413	0.8796	287	407	0.902	51	150		67	153
sw03266	806	1012	0.977	636	898	1.0064	690	1086	0.6377	869	773	1.3037		gi|28972662|dbj|BAC65747.1| mKIAA1201 protein [Mus musculus]
sw03267	195	344		300	423	1.2511	219	290		195	299			gi|52632395|gb|AAH18533.2| Ring finger and WD repeat domain 3 [Mus musculus]
sw03269	884	1059	0.9864	955	1229	1.0232	1487	1794	0.8225	365	583	0.9287		gi|76638149|ref|XP_600542.2| PREDICTED: similar to solute carrier family 30 (zinc transporter), member 1 isoform 1 [Bos taurus]
sw03270	982	783	1.5249	1654	1599	1.3501	2316	2921	0.8242	10408	814	10.4604		gi|67543883|ref|ZP_00421814.1| Phytanoyl-CoA dioxygenase [Burkholderia vietnamiensis G4] Phytanoyl-CoA dioxygenase [Burkholderia vietnamiensis G4]
sw03275	7578	5560	1.2197	6066	3996	1.7453	4992	2650	1.7379	1022	4913	0.2267		gi|28317277|gb|AAO39638.1| AT18914p [Drosophila melanogaster]
sw03279	214	352		222	445	0.9251	99	301		100	295
sw03281	892	1113	0.9647	427	854	0.7178	369	573	0.6842	777	684	1.4358		gi|73967349|ref|XP_537766.2| PREDICTED: similar to skeletal muscle and kidney enriched inositol phosphatase isoform 1 [Canis familiaris]
sw03287	6629	7660	0.8258	6256	6083	1.1083	7181	5613	1.3175	6331	7667	0.8129		gi|75773506|gb|AAI05158.1| Eukaryotic translation initiation factor 4B [Bos taurus] eukaryotic translation initiation factor 4B [Bos taurus]
sw03290	231	356		411	472	1.2977	271	403	0.9451	50	294
sw03291	269	458	0.8704	227	488	0.7428	168	442	0.5182	195	480	0.6184		gi|20334294|dbj|BAB91145.1| beta-glucosidase [Neotermes koshunensis]
sw03292	231	347		278	332		115	299		501	326	2.0523		gi|85857460|gb|ABC86266.1| RE45749p [Drosophila melanogaster]
sw03296	248	423	0.853	361	515	0.97	204	314		135	294			gi|48095098|ref|XP_392238.1| PREDICTED: similar to ENSANGP00000009981 [Apis mellifera]
sw03300	3196	3093	0.9615	3524	5194	0.6438	2804	4342	0.583	2930	3831	0.7459		gi|76643547|ref|XP_875018.1| PREDICTED: similar to Mitochondrial import inner membrane translocase subunit Tim22 isoform 2 [Bos taurus]
sw03301	2080	4137	0.4838	926	2128	0.542	278	1082	0.2373	979	9548	0.1024		gi|76791840|ref|ZP_00774344.1| General substrate transporter [Pseudoalteromonas atlantica T6c] General substrate transporter [Pseudoalteromonas atlantica T6c]
sw03308	321	336		306	439	0.9365	307	316		163	313			gi|68441587|ref|XP_696062.1| PREDICTED: similar to zinc finger protein 585A, partial [Danio rerio]
sw03312	516	651	0.9181	768	1003	0.8741	1036	802	1.3105	117	485	0.3096
sw03313	2391	2686	0.8981	2305	3018	0.8249	3053	3030	0.9541	2350	2766	0.8475		gi|45758288|gb|AAS76477.1| myelin expression factor 2 [Danio rerio] myelin expression factor 2 [Danio rerio]
sw03323	331	407	0.9636	154	317		45	152		60	154
sw03327	463	488	1.0688	390	578	0.8721	581	731	0.9162	985	686	1.5893		gi|72093982|ref|XP_788157.1| PREDICTED: similar to solute carrier family 25, member 36 [Strongylocentrotus purpuratus]
sw03328	1636	1862	0.8616	3006	2099	1.3165	5485	2984	1.6718	5969	950	6.5405		gi|87248603|gb|ABD36354.1| serine hydroxymethyltransferase [Bombyx mori]
sw03335	317	363		456	510	1.0741	259	335		430	436	1.3561		gi|20177053|gb|AAM12288.1| RE13587p [Drosophila melanogaster]
sw03336	187	273		414	289	1.6125	116	252		11	255			gi|68395236|ref|XP_692401.1| PREDICTED: similar to leucine rich repeat containing 15 [Danio rerio]
sw03337	569	1000	0.6612	306	745	0.5628	523	680	0.7935	134	940	0.1987		gi|18693297|gb|AAL78310.1| PDZ domain containing protein NHERF-2 [Oryctolagus cuniculus] Na(+)/H(+) exchange regulatory cofactor NHE-RF2 (PDZ domain containing protein NHERF-2) (Solute carrier family 9 isoform A3 regulatory factor 2) (Sodium-hydrogen exchanger regulatory factor 2)
sw03341	353	448	1.0015	463	455	1.2781	173	272		130	309			gi|45553505|ref|NP_996289.1| slowpoke CG10693-PC, isoform C [Drosophila melanogaster] CG10693-PC, isoform C [Drosophila melanogaster]
sw03342	280	425	0.8849	260	357		245	469	0.6802	129	187			gi|76647435|ref|XP_592281.2| PREDICTED: similar to breast cancer metastasis-suppressor 1-like [Bos taurus] breast cancer metastasis-suppressor 1-like [Homo sapiens] PREDICTED: similar to breast cancer metastasis-suppressor 1-like [Canis familiaris] PREDICTED: similar to breast cancer metastasis-suppressor 1-like [Rattus norvegicus] Breast cancer metastasis-suppressor 1-like [Homo sapiens]
sw03345	313	465	0.8283	357	490	0.9888	54	175		94	245			gi|66521278|ref|XP_393837.2| PREDICTED: similar to ENSANGP00000019824 [Apis mellifera]
sw03347	751	861	0.8874	745	968	0.8507	549	778	0.7856	589	1241	0.5852		gi|14603167|gb|AAH10048.1| RNA, U3 small nucleolar interacting protein 2 [Homo sapiens] RNA, U3 small nucleolar interacting protein 2 [Homo sapiens] RNA, U3 small nucleolar interacting protein 2 [Homo sapiens] U3 snoRNP associated 55 kDa protein [Homo sapiens] RNA, U3 small nucleolar interacting protein 2 [Homo sapiens] RNA, U3 small nucleolar interacting protein 2 [Homo sapiens] U3 small nucleol…
sw03348	391	469	0.9533	251	430	0.6944	373	520	0.8005	223	453	0.7228		gi|68492200|ref|XP_710120.1| putative vesicular transport factor Uso1p [Candida albicans SC5314] likely vesicular transport factor Uso1p [Candida albicans SC5314]
sw03350	282	313		306	424	0.9357	120	248		113	352
sw03352	3408	2379	1.288	3735	3326	1.025	2254	1969	1.1901	3948	2360	1.5158		gi|60678153|gb|AAX33583.1| GH10846p [Drosophila melanogaster]
sw03353	635	636	1.1116	368	530	0.9269	185	368		78	920	0.1313		gi|33589346|gb|AAQ22440.1| RE64209p [Drosophila melanogaster]
sw03355	7361	6460	0.8835	7574	7109	0.9107	6822	8648	0.9174	4767	6193	0.7313		gi|25012887|gb|AAN71531.1| RH13862p [Drosophila melanogaster]
sw03356	387	465	0.9553	376	343		238	323		371	388			gi|73984598|ref|XP_859885.1| PREDICTED: similar to vestigial like 4 isoform 3 [Canis familiaris]
sw03358	556	617	1.0646	302	394		215	227		74	632	0.1885		gi|61675663|gb|AAX51647.1| RE24732p [Drosophila melanogaster]
sw03360	820	662	1.3059	1186	1370	0.8365	723	1026	0.7455	947	1314	0.7618		gi|68401632|ref|XP_685461.1| PREDICTED: similar to RNA polymerase 1-1 isoform 1 [Danio rerio] RNA polymerase 1-1 [Danio rerio] RNA polymerase 1-1 [Danio rerio]
sw03364	3188	5082	0.5537	3685	6986	0.4643	5266	3443	1.7593	5829	2402	2.2037		gi|13928531|dbj|BAB47155.1| Bombyrin [Bombyx mori]
sw03368	468	768	0.6626	522	722	0.7911	790	875	0.9916	296	598	0.7541		gi|19921250|ref|NP_609646.1| loquacious CG6866-PB, isoform B [Drosophila melanogaster] R3D1-L [Drosophila melanogaster] RE14437p [Drosophila melanogaster] CG6866-PB, isoform B [Drosophila melanogaster]
sw03369	1127	1176	1.0765	1184	1326	0.9792	1092	965	1.2511	930	1301	0.8371		gi|49072840|gb|AAT51707.1| DEAD box RNA helicase [Choristoneura fumiferana]
sw03370	5776	3531	1.527	5116	8192	0.5782	1904	7980	0.2715	113	4937	0.0361		gi|87248601|gb|ABD36353.1| antennal binding protein [Bombyx mori]
sw03371	306	452	0.8064	322	436	0.9531	25	246		44	267			gi|12964646|dbj|BAB32672.1| receptor type guanylyl cyclase [Bombyx mori]
sw03378	298	397		387	510	0.9703	91	221		50	174			gi|66507711|ref|XP_623486.1| PREDICTED: similar to axonemal dynein light chain p33 [Apis mellifera]
sw03379	241	280		573	508	1.3345	293	483	0.8829	152	266			gi|66513288|ref|XP_392481.2| PREDICTED: similar to peroxinectin [Apis mellifera]
sw03390	2199	2199	1.0555	2681	2574	1.1165	1297	1289	1.1423	2690	2157	1.3743		gi|17026058|dbj|BAB72089.1| cryptochrome 1 [Macaca fascicularis]
sw03391	580	680	0.9333	328	475	0.8563	357	272		1187	433	3.2068		gi|27542790|gb|AAO16877.1| wunen-trimeric MYC tag fusion protein [synthetic construct]
sw03392	59	218		179	401	0.5726	13	189		33	186
sw03396	540	629	0.9128	354	611	0.6133	162	416	0.6367	190	338
sw03397	362	395		440	552	1.0066	227	306		495	313	2.3436		gi|26986579|ref|NP_758476.1| prolyl-tRNA synthetase (mitochondrial)(putative) [Mus musculus] CDNA sequence BC027073 [Mus musculus] Probable prolyl-tRNA synthetase, mitochondrial precursor (Proline--tRNA ligase) (ProRS)
sw03402	264	363		477	563	1.0921	36	188		37	174
sw03405	524	646	0.9963	539	726	0.8875	739	493	1.8047	441	777	0.8288		gi|68363318|ref|XP_688132.1| PREDICTED: similar to Wolf-Hirschhorn syndrome candidate 2 (predicted) [Danio rerio]
sw03406	410	443	1.2613	422	502	1.1071	109	272		111	299
sw03408	638	935	0.709	1029	943	1.1041	343	439	1.0117	302	828	0.4779
sw03412	467	455	1.1325	590	596	1.028	397	519	0.9478	287	300			gi|11493738|gb|AAG35630.1| DNA polymerase alpha [Xenopus laevis] DNA polymerase alpha catalytic subunit
sw03413	706	966	0.8557	720	652	1.1887	537	499	1.1529	325	388			gi|54290089|dbj|BAD61056.1| MCM7 [Bombyx mori]
sw03415	311	345		622	503	1.378	195	406	0.6861	53	192			gi|66516898|ref|XP_391826.2| PREDICTED: similar to yellow [Apis mellifera]
sw03416	3753	2880	1.1044	6137	3335	1.6148	2802	1973	1.4933	946	3263	0.3102		gi|7328579|gb|AAF59840.1| CHARYBDE [Drosophila melanogaster]
sw03420	888	734	1.2028	1061	898	1.1795	374	369		854	773	1.5783		gi|54873615|ref|NP_081075.2| ribonuclease III [Mus musculus]
sw03422	407	479	1.069	421	444	1.1811	112	161		100	308			gi|20987888|gb|AAH30434.1| Katanin p60 subunit A-like 1 [Mus musculus] katanin p60 subunit A-like 1 [Mus musculus] Katanin p60 ATPase-containing subunit A-like 1 (Katanin p60 subunit A-like 1) (p60 katanin-like 1)
sw03423	382	471	0.8741	458	468	1.1414	84	184		46	188			gi|68361946|ref|XP_690893.1| PREDICTED: similar to Dedicator of cytokinesis protein 9 (Cdc42 guanine nucleotide exchange factor zizimin 1) [Danio rerio]
sw03426	2118	2268	0.9573	2340	2480	0.9509	2386	2899	0.8536	1267	2063	0.6233		gi|54644959|gb|EAL33699.1| GA13693-PA [Drosophila pseudoobscura]
sw03428	4680	501	8.0038	516	728	0.6745	2659	560	5.1109	7501	2017	3.3182		gi|217201|dbj|BAA01258.1| invertase [Zymomonas mobilis]
sw03431	258	320		307	331		174	269		424	205	3.2675		gi|70672475|gb|AAZ06444.1| CG17843-P [Drosophila simulans]
sw03432	326	425	0.8433	253	371		211	268		156	280			gi|3822409|gb|AAC69874.1| synaptosome-associated protein SNAP-25-1; SNAP-25 type 1 [Leucophaea maderae]
sw03435	375	491	0.8339	311	388		67	162		85	233
sw03436	3083	1864	1.3792	3568	2158	1.4952	2872	1399	2.1681	6248	2004	2.8234		gi|72009784|ref|XP_784731.1| PREDICTED: similar to synoviolin 1 [Strongylocentrotus purpuratus]
sw03438	380	359		525	602	0.9946	363	479	0.8396	296	297
sw03440	281	286		293	375		400	391	1.2124	304	286			gi|25288036|pir||C88700 protein K02B2.1 [imported] - Caenorhabditis elegans
sw03442	356	460	0.9852	265	355		201	364		194	427	0.7622		gi|27684485|ref|XP_219939.1| PREDICTED: similar to Twinkle [Rattus norvegicus]
sw03455	634	437	1.4262	390	426	1.0017	443	513	1.0458	387	443	1.1908		gi|76670753|ref|XP_583822.2| PREDICTED: similar to Zinc finger protein 208 [Bos taurus]
sw03457	296	499	0.8551	288	346		113	236		51	374			gi|74054328|gb|AAZ95526.1| serine-rich repeat protein [Streptococcus agalactiae]
sw03458	5787	5842	0.9837	6170	9927	0.7047	5864	7448	0.8323	6027	6003	0.931		gi|87248389|gb|ABD36247.1| rotamase Pin1 [Bombyx mori]
sw03460	385	683	0.7585	504	846	0.8375	183	546	0.3902	103	625	0.3264		gi|19548965|gb|AAL90881.1| cuticle protein 20 [Manduca sexta] Pupal cuticle protein 20 precursor (MsCP20) (MS-PCP20)
sw03461	110	227		204	561	0.6644	75	166		43	194
sw03464	692	716	1.2645	516	960	0.7464	618	632	1.0137	442	603	1.0081
sw03466	824	981	1.0293	521	977	0.7659	981	948	1.0421	176	1004	0.2704		gi|25009695|gb|AAN71023.1| AT04445p [Drosophila melanogaster]
sw03470	628	890	0.8889	506	819	0.9001	356	485	0.8083	386	829	0.6233
sw03474	2188	2526	0.9036	2304	3184	0.8112	3179	3978	0.896	2153	3046	0.7944		gi|89473722|gb|ABD72673.1| putative ubiquitin-conjugating enzyme 9 [Acyrthosiphon pisum]
sw03475	4589	3302	1.4087	6007	3813	1.7226	5943	2922	2.1283	710	4488	0.201		gi|82931586|ref|XP_917582.1| PREDICTED: similar to abnormal cell LINeage family member (lin-41) [Mus musculus]
sw03476	997	1132	1.0172	915	977	1.1218	1337	1129	1.1517	1168	1199	1.068		gi|66518870|ref|XP_391883.2| PREDICTED: similar to zinc finger protein 236 [Apis mellifera]
sw03478	2790	2492	1.17	2621	3676	0.7939	2412	3623	0.7373	3297	3278	1.0987		gi|54641769|gb|EAL30519.1| GA19216-PA [Drosophila pseudoobscura]
sw03480	200	374		328	431	1.1087	240	503	0.591	157	338			gi|75704935|gb|ABA24611.1| ABC-type phosphate/phosphonate transport system periplasmic component-like [Anabaena variabilis ATCC 29413] ABC-type phosphate/phosphonate transport system periplasmic component-like [Anabaena variabilis ATCC 29413]
sw03482	182	275		256	505	0.8197	208	467	0.6121	213	350			gi|55236147|gb|EAA14084.2| ENSANGP00000013353 [Anopheles gambiae str. PEST] ENSANGP00000013353 [Anopheles gambiae str. PEST]
sw03489	701	787	1.0946	990	957	1.2809	1635	1021	1.5976	399	306			gi|5702206|gb|AAD47201.1| delta-A kinase anchor protein 200 [Drosophila melanogaster]
sw03490	817	819	1.173	1361	1360	1.1373	2324	1612	1.5765	5842	718	7.7259		gi|87248159|gb|ABD36132.1| hydroxymethylglutaryl-CoA lyase isoform 1 [Bombyx mori]
sw03491	192	312		76	387		946	1393	0.769	1207	312	4.8617		gi|85857460|gb|ABC86266.1| RE45749p [Drosophila melanogaster]
sw03493	658	1052	0.7326	788	1187	0.842	934	1295	0.6779	522	983	0.6264		gi|6019470|gb|AAD53327.2| RNA lariat debranching enzyme [Homo sapiens]
sw03494	1807	1722	1.1129	1320	1300	1.1566	1976	1059	2.1544	1697	2460	0.7326		gi|66510594|ref|XP_624428.1| PREDICTED: similar to Zfr protein [Apis mellifera]
sw03497	356	524	0.9071	458	613	1.0346	394	496	0.8442	256	400	0.8951		gi|73947688|ref|XP_854374.1| PREDICTED: similar to Zinc finger protein 85 (Zinc finger protein HPF4) (HTF1) [Canis familiaris]
sw03499	221	309		302	550	0.8064	256	433	0.8004	218	529	0.5333		gi|24660504|ref|NP_648161.1| CG8281-PA [Drosophila melanogaster] GM10231p [Drosophila melanogaster] CG8281-PA [Drosophila melanogaster]
sw03503	826	619	1.4879	597	726	1.0533	1162	538	2.3903	886	1221	0.7395		gi|73947650|ref|XP_867118.1| PREDICTED: similar to suppressor of Ty 5 homolog isoform 2 [Canis familiaris]
sw03511	460	649	0.7721	427	600	0.9027	507	792	0.7606	616	679	1.0349		gi|22294905|dbj|BAC08733.1| oligopeptidase A [Thermosynechococcus elongatus BP-1] oligopeptidase A [Thermosynechococcus elongatus BP-1]
sw03512	441	456	1.1409	276	437	0.8365	288	374		92	352			gi|50759975|ref|XP_417848.1| PREDICTED: similar to salt-inducible kinase 2 [Gallus gallus]
sw03513	2870	3188	0.8908	3448	3101	1.1573	4864	2696	1.7338	4629	3334	1.2497		gi|73975293|ref|XP_532375.2| PREDICTED: similar to TPA regulated locus [Canis familiaris]
sw03522	2692	1803	1.4122	7033	4080	1.5119	7264	5496	1.3382	8161	1958	3.7349		gi|24642872|ref|NP_573250.1| CG6762-PA [Drosophila melanogaster] GH18251p [Drosophila melanogaster] CG6762-PA [Drosophila melanogaster] Putative sulfiredoxin
sw03524	277	458	0.7322	261	446	0.7172	205	329		412	362	1.7155		gi|57108173|ref|XP_535464.1| PREDICTED: similar to sulfide dehydrogenase like isoform 1 [Canis familiaris] PREDICTED: similar to sulfide dehydrogenase like isoform 2 [Canis familiaris]
sw03530	335	558	0.7796	287	535	0.7417	153	302		71	271			gi|86515436|ref|NP_001034542.1| Aquaporin-1 [Gallus gallus] Aquaporin-1 [Gallus gallus]
sw03531	394	568	0.7038	305	409	0.9765	165	418	0.652	83	316
sw03532	1455	1130	1.199	1795	1923	0.8598	1374	1846	0.7252	1563	1634	1.023		gi|66504312|ref|XP_395230.2| PREDICTED: similar to DNA polymerase gamma [Apis mellifera]
sw03535	411	428	1.0557	194	279		129	221		116	202			gi|68384329|ref|XP_689841.1| PREDICTED: similar to Myeloid leukemia factor 2 (Myelodysplasia-myeloid leukemia factor 2) [Danio rerio]
sw03539	295	440	0.7744	524	341	1.7555	1071	588	2.124	17	437	0.1382		gi|48098777|ref|XP_392558.1| PREDICTED: similar to YTH domain containing 2 [Apis mellifera]
sw03540	3152	2843	0.9812	3028	3155	0.891	2573	2849	0.9326	2682	3170	0.7762		gi|73989867|ref|XP_850213.1| PREDICTED: similar to haloacid dehalogenase-like hydrolase domain containing 4 [Canis familiaris]
sw03543	9868	6838	1.1179	9891	8600	0.9504	6566	8510	0.8942	9214	7718	1.0684		gi|2285788|dbj|BAA21658.1| Multiprotein bridging factor 1 [Bombyx mori]
sw03544	763	740	1.0771	591	586	1.0354	725	646	1.2092	669	720	1.0754		gi|1448983|gb|AAC37264.1| chromodomain-helicase-DNA-binding protein
sw03545	1003	964	1.0846	19254	18349	0.9824	27079	36064	0.7794	49887	800	51.8238		gi|1174445|sp|P20613|SSP2_BOMMO Sex-specific storage-protein 2 precursor (SP 2) (Arylphorin) storage protein SP2
sw03546	281	473	0.7635	214	350		129	212		1428	315	7.02		gi|24648441|ref|NP_732526.1| CG5191-PD, isoform D [Drosophila melanogaster] CG5191-PA, isoform A [Drosophila melanogaster] CG5191-PD, isoform D [Drosophila melanogaster] CG5191-PA, isoform A [Drosophila melanogaster]
sw03548	13106	6632	1.5215	18134	14185	1.0623	10515	12760	0.8447	911	11791	0.0714		gi|50764028|ref|XP_422928.1| PREDICTED: similar to aldose reductase [Gallus gallus]
sw03549	2890	2654	1.013	3382	2157	1.6758	1509	1824	0.7887	470	2874	0.1738
sw03552	311	441	0.8265	431	492	0.9389	261	508	0.5902	211	436	0.7233
sw03553	515	777	0.8167	803	832	1.1074	711	694	1.1541	354	513	0.9735		gi|72167566|ref|XP_785973.1| PREDICTED: similar to reticulon 4 interacting protein 1 [Strongylocentrotus purpuratus]
sw03556	737	582	1.3275	1813	2481	0.688	1182	3750	0.2615	4178	320	13.5889		gi|13383195|dbj|BAB39500.1| fibroin P25 [Bombyx mandarina]
sw03560	791	1118	0.7203	1713	1761	0.9336	1329	1685	0.8003	824	828	1.2047		gi|13506751|gb|AAK28318.1| putative deoxynucleoside kinase [Bombyx mori]
sw03561	1066	993	1.2245	1715	1427	1.2853	1574	1048	1.6759	1323	1031	1.5722
sw03563	1462	1508	0.9756	1763	1836	0.9859	1039	1304	0.9186	4367	802	5.5636		gi|3004821|gb|AAC39088.1| putative inorganic phosphate cotransporter [Drosophila ananassae] Putative inorganic phosphate cotransporter
sw03570	3549	2977	1.2286	6014	5503	1.1103	4035	5062	0.8835	4101	3319	1.2654		gi|74354774|gb|AAI02270.1| Biliverdin reductase B (flavin reductase (NADPH)) [Bos taurus] biliverdin reductase B (flavin reductase (NADPH)) [Bos taurus] flavin reductase Flavin reductase (FR) (NADPH-dependent diaphorase) (NADPH-flavin reductase) (FLR) (Biliverdin reductase B) (BVR-B) (Biliverdin-IX beta-reductase) (Green heme-binding protein) (GHBP) flavin reductase
sw03572	880	790	1.1503	601	578	1.0951	266	461	0.8392	2479	613	5.3608		gi|25012361|gb|AAN71290.1| RE08130p [Drosophila melanogaster]
sw03574	429	552	0.9621	671	872	0.9047	311	423	0.9705	249	383			gi|72151988|ref|XP_787543.1| PREDICTED: similar to mediator of DNA damage checkpoint 1 [Strongylocentrotus purpuratus]
sw03575	1203	1084	1.0897	1985	2062	0.9856	1364	2140	0.7646	1856	493	3.9709		gi|68076941|ref|XP_680390.1| MAEBL [Plasmodium berghei strain ANKA] MAEBL, putative [Plasmodium berghei]
sw03580	4340	4591	0.7751	5500	5944	0.8168	2441	4357	0.6876	3725	6739	0.4963		gi|87248489|gb|ABD36297.1| rRNA processing protein Ebp2 [Bombyx mori]
sw03582	4677	3886	1.2109	6273	5493	1.1603	4338	5323	0.8992	3342	4506	0.7494		gi|50417589|gb|AAH77664.1| MGC89748 protein [Xenopus tropicalis] MGC89748 protein [Xenopus tropicalis] small nuclear ribonucleoprotein D2 polypeptide 16.5kDa [Xenopus tropicalis]
sw03584	328	404	0.9544	481	550	0.9275	65	249		76	299
sw03588	1276	1123	1.0947	1140	1053	1.0793	632	657	1.1362	949	1819	0.6063		gi|5869803|emb|CAB55570.1| kurz protein [Drosophila melanogaster]
sw03589	593	828	0.8515	1185	1300	0.9825	950	1014	1.0825	608	1013	0.7982		gi|28380956|gb|AAO41445.1| RE29053p [Drosophila melanogaster]
sw03591	177	256		287	401	0.8852	82	218		38	159
sw03596	1014	982	1.0213	911	1007	0.8964	769	931	0.9555	747	972	1.0373		gi|85725140|ref|NP_001034010.1| CG33991-PD, isoform D [Drosophila melanogaster] CG33991-PD, isoform D [Drosophila melanogaster]
sw03597	784	889	1.0087	1122	1150	1.0623	827	1171	0.8064	539	877	0.846		gi|66515368|ref|XP_624877.1| PREDICTED: similar to ubiquitin-binding protein homolog [Apis mellifera]
sw03607	5833	4128	1.1416	6315	6188	0.9393	3279	4979	0.7521	4188	4943	0.829		gi|54609321|gb|AAV34876.1| ribosomal protein S18 [Bombyx mori] Ribosomal protein S18 [Plutella xylostella]
sw03608	442	442	1.1144	944	787	1.2147	154	491	0.4743	38	502	0.1685
sw03610	7342	10546	0.6328	9130	12510	0.7091	7175	11754	0.7396	6170	12523	0.4717		gi|59858992|gb|AAX09282.1| zinc finger protein [Bombyx mori]
sw03612	15130	12650	0.85	23627	18892	0.9997	13462	10853	1.3897	26650	6623	4.38		gi|4115422|dbj|BAA36352.1| protein disulphide isomerase like protein [Antheraea pernyi]
sw03613	1377	1516	0.9505	1490	981	1.4883	561	996	0.6454	63	1881	0.0702		gi|61316393|ref|NP_001013024.1| ephrin receptor [Apis mellifera] ephrin receptor [Apis mellifera]
sw03615	457	510	0.9462	321	437	0.9101	112	282		345	479	1.024
sw03619	2614	1577	1.4177	4710	2311	1.9693	4326	2756	1.625	5301	1863	2.7031		gi|6010021|emb|CAB57222.1| catalase [Cavia porcellus] Catalase
sw03621	326	335		612	517	1.4311	473	226	2.5157	166	341			gi|15082379|gb|AAH12103.1| 3-phosphoinositide dependent protein kinase-1 [Homo sapiens] 3-phosphoinositide dependent protein kinase-1 isoform 1 [Homo sapiens] PDPK1 [Homo sapiens] 3-phosphoinositide-dependent protein kinase 1 (hPDK1) 3-phosphoinositide dependent protein kinase-1 [Homo sapiens] PkB kinase [Homo sapiens]
sw03622	1522	1487	1.0701	2086	2298	0.9215	1636	2110	0.8052	1803	1496	1.2112		gi|87248361|gb|ABD36233.1| ribosomal protein S34 [Bombyx mori]
sw03623	431	467	0.9865	327	407	0.95	344	523	0.7994	698	334	2.9115		gi|2342862|gb|AAB67672.1| branched chain aminotransferase precursor [Homo sapiens]
sw03628	364	422	0.9375	379	380		67	288		104	220
sw03629	1118	1037	1.0974	1332	1582	0.8691	1190	1277	1.0229	1132	859	1.5417		gi|37682125|gb|AAQ97989.1| HSPC049 protein [Danio rerio] HSPC049 protein-like [Danio rerio]
sw03637	378	379		543	792	0.7848	450	940	0.6138	1717	253	6.6094		gi|71557964|gb|AAZ37175.1| aldose 1-epimerase [Pseudomonas syringae pv. phaseolicola 1448A] aldose 1-epimerase [Pseudomonas syringae pv. phaseolicola 1448A]
sw03641	2031	2649	0.7081	2432	1867	1.2935	1248	1268	1.0969	37	1390	0.0698
sw03647	362	407	0.9385	456	418	1.1946	75	191		104	188			gi|63990991|gb|AAY40918.1| unknown [Homo sapiens] Nuclear transcription factor, X-box binding-like 1 [Homo sapiens]
sw03649	1844	1654	1.2051	1215	1111	1.3604	1750	872	2.183	213	1956	0.1626		gi|29134779|dbj|BAC66140.1| projectin [Procambarus clarkii]
sw03653	1707	1772	1.0601	2028	2315	1.0439	1909	2445	0.7507	1535	1775	1.022		gi|87248663|gb|ABD36384.1| transmembrane BAX inhibitor motif-containing protein 5 [Bombyx mori]
sw03654	6148	5860	1.0365	6485	8926	0.8246	6472	7773	0.8809	16347	3246	4.0313		gi|50752156|ref|XP_422682.1| PREDICTED: similar to DnaJ homolog subfamily B member 11 precursor (ER-associated dnaJ protein 3) (ErJ3) (ER-associated Hsp40 co-chaperone) (hDj9) (PWP1-interacting protein 4) (UNQ537/PRO1080) [Gallus gallus]
sw03657	269	352		330	483	1.0973	238	416	0.7178	246	299			gi|66560076|ref|XP_624348.1| PREDICTED: similar to CG12114-PA [Apis mellifera]
sw03659	635	998	0.8327	605	872	1.0514	815	923	0.932	158	836	0.3323		gi|14423721|sp|Q9NFZ2|GBGE_CALVI Guanine nucleotide-binding protein gamma-e subunit precursor guanine nucleotide-binding protein gamma subunit [Calliphora vicina]
sw03660	2900	2882	1.044	3387	3538	1.0909	4094	4041	0.9926	849	4446	0.2045		gi|6978595|ref|NP_036651.1| calcium/calmodulin-dependent protein kinase II, delta [Rattus norvegicus] Calcium/calmodulin-dependent protein kinase type II delta chain (CaM-kinase II delta chain) (CaM kinase II delta subunit) (CaMK-II delta subunit) calmodulin-dependent protein kinase II-delta (EC 2.7.1.37)
sw03662	528	770	0.8888	223	656	0.5731	71	416	0.2762	22	326
sw03665	203	289		306	429	1.1504	123	265		44	199			gi|66522086|ref|XP_393335.2| PREDICTED: similar to ENSANGP00000003834 [Apis mellifera]
sw03667	300	481	0.9082	526	1229	0.5655	283	310		168	296			gi|68446086|dbj|BAE03670.1| unnamed protein product [Staphylococcus haemolyticus JCSC1435] hypothetical protein SH0361 [Staphylococcus haemolyticus JCSC1435]
sw03670	772	584	1.7039	400	563	1.0384	1108	514	2.8962	911	958	1.2338
sw03677	209	449	0.6985	168	524	0.5791	190	347		139	341
sw03679	773	849	1.1316	871	1829	0.597	900	1600	0.6078	1678	910	2.0155		gi|56378319|dbj|BAD74196.1| heat shock protein hsp20.1 [Bombyx mori]
sw03684	257	275		456	482	1.2388	470	354	1.5004	1187	359	5.5669		gi|25012444|gb|AAN71328.1| RE22749p [Drosophila melanogaster]
sw03687	401	444	1.1216	248	438	0.8784	165	342		89	317
sw03688	3138	3431	0.8294	4500	3528	1.3185	5770	3885	1.376	3633	2472	1.6538		gi|133504|sp|P27864|RRP1_DROME Recombination repair protein 1 (DNA-(apurinic or apyrimidinic site) lyase) recombination repair protein 1 [Drosophila melanogaster] recombination repair protein
sw03689	341	395		445	417	1.5221	708	387	2.0254	510	488	1.2687		gi|73959283|ref|XP_547147.2| PREDICTED: similar to Coronin 7 (70 kDa WD-repeat tumor rejection antigen homolog) [Canis familiaris]
sw03691	210	248		161	354		168	258		429	239	2.5416		gi|71296911|gb|AAH36701.1| ACPL2 protein [Homo sapiens]
sw03693	6844	5758	1.1139	7990	9662	0.9055	9835	7520	1.3057	6529	5235	0.907		gi|72129092|ref|XP_795791.1| PREDICTED: similar to acyl-Coenzyme A dehydrogenase, C-4 to C-12 straight chain [Strongylocentrotus purpuratus]
sw03695	407	529	0.9416	428	625	0.9332	459	844	0.6786	244	472	0.6763
sw03697	271	543	0.6777	226	675	0.5109	254	430	0.7238	858	329	2.9705		gi|68697266|emb|CAJ14159.1| putative esterase [Anopheles gambiae]
sw03703	285	319		403	423	1.2383	384	457	1.0641	312	275			gi|86152951|ref|ZP_01071156.1| highly acidic protein [Campylobacter jejuni subsp. jejuni HB93-13] highly acidic protein [Campylobacter jejuni subsp. jejuni HB93-13]
sw03709	518	807	0.7905	314	636	0.7058	306	423	0.8653	151	411	0.6105		gi|3649670|emb|CAA09595.1| Su(P) [Drosophila melanogaster] hypothetical protein [Drosophila melanogaster]
sw03710	359	434	1.0768	371	428	1.1417	218	257		146	290			gi|55242911|gb|EAA07041.2| ENSANGP00000016729 [Anopheles gambiae str. PEST] ENSANGP00000016729 [Anopheles gambiae str. PEST]
sw03711	6977	9906	0.5398	6358	6261	0.9731	3468	4209	0.8597	1509	5232	0.3083
sw03714	13393	12152	0.9007	20133	8851	1.8027	14153	8443	1.6849	2134	11897	0.1503		gi|28574416|ref|NP_788481.1| CG6416-PI, isoform I [Drosophila melanogaster] CG6416-PI, isoform I [Drosophila melanogaster]
sw03717	377	563	0.8352	513	656	0.9644	638	671	0.9744	303	542	0.7649		gi|20271146|gb|AAM18528.1| frount protein [Homo sapiens] nucleoporin Nup75 [Homo sapiens] Nucleoporin 85 [Homo sapiens] nucleoporin 85 [Homo sapiens]
sw03726	1614	1087	1.4746	2535	2423	1.04	1386	2181	0.6671	10286	1306	7.2148		gi|48139441|ref|XP_397008.1| PREDICTED: similar to Diacetyl/L-xylulose reductase [Apis mellifera]
sw03729	5591	5897	0.8089	7148	7598	0.9182	9537	6034	1.735	10306	4164	2.0874		gi|1764109|gb|AAC64661.1| pacifastin light chain precursor [Pacifastacus leniusculus]
sw03730	457	515	1.0887	365	561	0.797	173	252		367	294			gi|2765006|emb|CAA70818.1| serine protease inhibitor I [Schistocerca gregaria] Serine protease inhibitor I/II precursor [Contains: Protease inhibitor SGPI-1 (Schistocerca gregaria trypsin inhibitor) (SGTI); Protease inhibitor SGPI-2 (Schistocerca gregaria chymotrypsin inhibitor) (SGCI)]
sw03733	10861	6921	1.2592	13277	9774	1.3297	12686	5307	2.8047	12243	7480	1.3284		gi|68441657|ref|XP_698520.1| PREDICTED: similar to G protein-coupled receptor 158 [Danio rerio]
sw03736	4311	3252	1.142	4869	5631	0.7835	2805	3631	0.7955	3150	5407	0.5125		gi|72011152|ref|XP_780300.1| PREDICTED: similar to Guanine nucleotide releasing protein (GNRP) (P140 Ras-GRF) [Strongylocentrotus purpuratus]
sw03740	503	609	0.9015	721	850	0.8531	692	906	0.8128	377	767	0.6084
sw03742	1244	1571	0.8165	1647	1840	0.9485	952	1672	0.6344	707	2396	0.3201		gi|55235786|gb|EAA14577.2| ENSANGP00000020940 [Anopheles gambiae str. PEST] ENSANGP00000020940 [Anopheles gambiae str. PEST]
sw03750	779	706	1.2577	1016	952	1.2144	896	892	1.1919	626	984	0.8799
sw03751	400	427	1.1283	431	544	0.951	164	273		170	409	0.7143		gi|6692621|gb|AAF24766.1| XPC-like protein isoform a; MUS210a [Drosophila melanogaster]
sw03752	784	919	0.8731	777	701	1.1718	109	255		80	563	0.2995		gi|29134779|dbj|BAC66140.1| projectin [Procambarus clarkii]
sw03754	6379	6760	0.8445	9700	9965	0.9356	6479	8132	0.9192	12649	4815	2.3858		gi|70954504|gb|AAZ15878.1| deltamethrin resistance-associated NYD-GBE [Culex pipiens pallens]
sw03757	247	390		375	539	0.8745	123	295		51	239			gi|68533625|gb|AAH98623.1| LOC568408 protein [Danio rerio]
sw03758	5892	5839	0.9137	7382	7249	0.9961	5757	4902	1.3436	4621	5655	0.8253		gi|55242392|gb|EAA07910.2| ENSANGP00000014911 [Anopheles gambiae str. PEST] ENSANGP00000014911 [Anopheles gambiae str. PEST]
sw03759	855	858	1.0658	816	764	1.1923	220	314		121	336			gi|53792965|dbj|BAD54139.1| putative serine-threonine protein kinase [Oryza sativa (japonica cultivar-group)]
sw03766	221	340		341	455	0.9864	79	218		52	214
sw03770	756	664	1.3588	1592	1486	1.2059	1061	1329	0.9381	3303	830	4.7021		gi|5453746|ref|NP_006432.1| 5,10-methenyltetrahydrofolate synthetase (5-formyltetrahydrofolate cyclo-ligase) [Homo sapiens] 5,10-methenyltetrahydrofolate synthetase (5-formyltetrahydrofolate cyclo-ligase) [Homo sapiens] 5,10-methenyltetrahydrofolate synthetase 5-formyltetrahydrofolate cyclo-ligase (5,10-methenyl-tetrahydrofolate synthetase) (Methenyl-THF synthetase) (MTHFS)
sw03771	252	383		692	666	1.1867	86	223		34	184			gi|62665363|ref|XP_344781.2| PREDICTED: similar to M-BDG29 [Rattus norvegicus]
sw03772	755	787	0.9992	803	731	1.1295	657	876	0.8785	385	519	1.2179		gi|81674607|gb|AAI09538.1| Unknown (protein for MGC:134004) [Bos taurus] hypothetical protein LOC510711 [Bos taurus]
sw03778	749	748	1.2226	722	767	1.1548	264	472	0.7916	92	694	0.2519
sw03779	6674	7340	0.7434	6148	6991	0.7964	5271	5555	1.161	4075	9206	0.3471		gi|87248129|gb|ABD36117.1| exuperantia [Bombyx mori]
sw03780	385	399		423	398	1.2597	94	235		24	281
sw03781	907	898	1.133	1376	1439	1.0242	721	1107	0.741	577	857	0.9113		gi|30178841|gb|EAA04084.2| ENSANGP00000013389 [Anopheles gambiae str. PEST] ENSANGP00000013389 [Anopheles gambiae str. PEST]
sw03784	7613	7251	0.8445	9969	6779	1.2898	3953	4461	0.9775	1858	8603	0.1811
sw03787	1677	2481	0.6127	3478	3724	0.8706	1524	1168	1.6355	830	2107	0.3716		gi|73995995|ref|XP_850541.1| PREDICTED: similar to carbonic anhydrase 15 [Canis familiaris]
sw03794	1462	2031	0.7783	1289	1482	0.8961	1351	1422	0.9988	955	989	1.1379		gi|2791682|gb|AAC39864.1| secretory carrier-associated membrane protein [Homo sapiens]
sw03796	4457	2680	1.4211	5603	5124	0.9274	3643	4708	0.8443	3045	3265	1.0733		gi|4505369|ref|NP_002486.1| NADH dehydrogenase (ubiquinone) Fe-S protein 4, 18kDa (NADH-coenzyme Q reductase) [Homo sapiens] NADH:ubiquinone oxidoreductase 18 kDa IP subunit [Homo sapiens] NADH-ubiquinone oxidoreductase 18 kDa subunit, mitochondrial precursor (Complex I-18 kDa) (CI-18 kDa) (Complex I-AQDQ) (CI-AQDQ)
sw03799	786	840	0.8904	341	623	0.6533	327	300		155	576	0.4248		gi|88174321|gb|ABD39318.1| monocarboxylate transporter 2 [Bos taurus]
sw03800	478	422	1.2648	423	484	0.9481	68	190		148	361			gi|84993849|gb|ABC68342.1| heat shock protein hsp20.8 [Sesamia nonagrioides]
sw03802	1169	1319	0.9869	1945	2023	0.972	1061	1811	0.6521	66	2039	0.0552
sw03805	1150	1574	0.7924	1693	1422	1.1831	2806	1758	1.5294	26	1371	0.0512
sw03808	3790	3026	1.0556	4433	4055	0.9386	2485	3497	0.7686	2634	3293	0.9113		gi|27501446|ref|NP_003668.2| density-regulated protein [Homo sapiens] DENR protein [Homo sapiens] Density-regulated protein (DRP) (DRP1 protein) (Smooth muscle cell associated protein 3) (SMAP-3) SMAP-3 [Homo sapiens]
sw03819	361	452	0.8802	430	398	1.2529	102	164		92	368			gi|66510891|ref|XP_623265.1| PREDICTED: similar to ring finger and KH domain containing 3 [Apis mellifera]
sw03824	360	393		481	387	1.3462	77	178		121	218			gi|2055276|dbj|BAA19776.1| Pol protein [Bombyx mori]
sw03828	769	581	1.2973	1214	861	1.2541	740	996	0.8104	403	575	1.0312		gi|52138492|dbj|BAD46745.1| broad-complex B-NZ4 isoform [Bombyx mori] broad-complex A-NZ4 isoform [Bombyx mori]
sw03837	20303	15228	0.9605	32846	17407	1.6124	19438	15928	1.2171	952	19328	0.0729		gi|87248377|gb|ABD36241.1| notch-like protein [Bombyx mori]
sw03838	1952	2050	0.9948	2056	2550	0.7852	2133	2399	0.9263	1665	2017	0.977		gi|1616741|gb|AAC50731.1| hASNA-I [Homo sapiens]
sw03844	568	909	0.7839	662	943	0.9628	591	883	0.6543	321	670	0.7009		gi|67678042|gb|AAH97969.1| Dead end homolog 1 [Rattus norvegicus] dead end homolog 1 [Rattus norvegicus]
sw03846	361	488	1.0469	387	767	0.7619	519	673	0.7946	598	794	0.9302		gi|71725396|ref|NP_001025161.1| D14Ertd209e protein [Mus musculus]
sw03847	244	341		195	477	0.7692	319	287		153	304			gi|72011764|ref|XP_780861.1| PREDICTED: similar to ring finger protein 111 [Strongylocentrotus purpuratus]
sw03848	264	356		319	491	1.0195	184	234		217	258			No hits found
sw03851	478	772	0.8506	600	908	0.9996	572	567	1.1041	148	402	0.6799
sw03855	697	746	1.2139	388	598	1.069	451	401	1.2836	552	684	1.1119		gi|5921280|emb|CAB56505.1| NPC1 protein [Drosophila melanogaster]
sw03857	1390	1698	0.932	875	1136	0.9886	2224	1253	1.772	1259	1499	0.9118		gi|103056|pir||A37282 52K active chromatin boundary protein - fruit fly (Drosophila melanogaster)
sw03858	136	341		385	721	0.7624	136	249		111	330
sw03860	5065	6351	0.7352	4709	5714	0.8574	6637	6863	0.9781	4233	5695	0.6758		gi|87248221|gb|ABD36163.1| Sr protein [Bombyx mori]
sw03864	187	331		316	445	1.0277	129	377		78	228			gi|521229|dbj|BAA04086.1| cad protein [Bombyx mori]
sw03868	218	323		266	454	0.8563	356	321		113	366
sw03872	8533	8191	0.9331	9609	10742	0.9033	9617	12863	0.7748	16750	4469	3.211		gi|87248629|gb|ABD36367.1| translocon-associated protein gamma [Bombyx mori]
sw03873	176	275		299	451	1.0092	239	278		158	174
sw03874	2696	2889	0.9721	3355	3629	0.9498	2829	3226	0.8806	3072	3942	0.766		gi|74006881|ref|XP_863258.1| PREDICTED: similar to polyglutamine binding protein 1 isoform d isoform 3 [Canis familiaris]
sw03877	1273	1277	1.127	695	1305	0.6845	2608	878	3.1061	1223	2061	0.5855		gi|55237388|gb|EAA12205.2| ENSANGP00000018228 [Anopheles gambiae str. PEST] ENSANGP00000018228 [Anopheles gambiae str. PEST]
sw03878	287	374		233	417	0.8964	222	315		203	390			gi|55242634|gb|EAA07339.2| ENSANGP00000014367 [Anopheles gambiae str. PEST] ENSANGP00000014367 [Anopheles gambiae str. PEST]
sw03882	527	476	1.4002	969	1188	0.9825	808	922	1.0111	6490	311	19.8893		gi|126417|sp|P09336|LP3_BOMMO Low molecular 30 kDa lipoprotein PBMHPC-19 precursor 30K lipoprotein precursor [Bombyx mori]
sw03883	483	515	1.1226	552	804	0.8863	402	343	1.5001	383	376			No hits found
sw03884	1330	1371	1.001	1805	1831	1.0736	1651	2298	0.6733	1173	1477	0.9299		gi|48104652|ref|XP_395824.1| PREDICTED: similar to transcription factor IIB [Apis mellifera]
sw03887	735	669	1.2368	1033	1091	1.1104	1282	987	1.417	828	670	1.3966		gi|55238404|gb|EAA11457.2| ENSANGP00000007253 [Anopheles gambiae str. PEST] ENSANGP00000007253 [Anopheles gambiae str. PEST]
sw03888	11979	7435	1.3686	21978	15493	1.2569	23969	11411	1.8643	40628	1999	29.3017		gi|25090512|sp|Q25513|HGLY_MANSE Hemolymph glycoprotein precursor glycoprotein
sw03898	332	425	1.0247	310	484	0.8279	403	300	1.8907	225	470	0.6856		gi|49903277|gb|AAH76544.1| Squamous cell carcinoma antigen recognised by T cells [Danio rerio] squamous cell carcinoma antigen recognised by T cells [Danio rerio]
sw03900	2737	2506	1.0188	4478	4086	0.9832	3155	4102	0.7148	2643	2932	0.7925		gi|62083333|gb|AAX62391.1| mitochondrial ribosomal protein S17 [Lysiphlebus testaceipes]
sw03902	981	1282	0.8639	1535	1739	0.9199	2531	1692	1.7612	327	812	0.5054		gi|66561454|ref|XP_396916.2| PREDICTED: similar to Innexin shaking-B (Passover protein) [Apis mellifera]
sw03906	4114	4456	0.855	5925	5724	0.9482	4140	3893	1.0817	1969	4775	0.3848		gi|73949236|ref|XP_856020.1| PREDICTED: similar to Ubiquitin-conjugating enzyme E2 D2 (Ubiquitin-protein ligase D2) (Ubiquitin carrier protein D2) (Ubiquitin-conjugating enzyme E2-17 kDa 2) (E2(17)KB 2) isoform 6 [Canis familiaris]
sw03909	1628	1821	0.8945	1785	2005	0.9736	1589	2170	0.7265	1535	2170	0.7377		gi|73980977|ref|XP_855121.1| PREDICTED: similar to bolA-like 3 [Canis familiaris]
sw03910	283	314		460	499	1.1499	375	290		291	366			gi|71655878|ref|XP_816495.1| ATP-dependent DEAD/H RNA helicase [Trypanosoma cruzi strain CL Brener] ATP-dependent DEAD/H RNA helicase, putative [Trypanosoma cruzi]
sw03911	4622	3888	0.9443	3035	3575	0.8117	2791	2924	0.9915	3467	5599	0.5224		gi|50418451|gb|AAH77693.1| MGC89952 protein [Xenopus tropicalis] MGC89952 protein [Xenopus tropicalis] WD repeat domain 74 (NOP seven associated protein 1 (NSA1)) [Xenopus tropicalis]
sw03913	236	306		456	522	1.1002	177	258		56	386			gi|48097901|ref|XP_393919.1| PREDICTED: similar to RE52333p [Apis mellifera]
sw03915	3819	2654	1.2229	7313	5178	1.291	8651	4494	1.7534	19607	1736	11.1115		gi|49899988|gb|AAH76997.1| Palmitoyl-protein thioesterase 1 (ceroid-lipofuscinosis, neuronal 1, infantile) [Xenopus tropicalis] palmitoyl-protein thioesterase 1 (ceroid-lipofuscinosis, neuronal 1, infantile) [Xenopus tropicalis] palmitoyl-protein thioesterase 1 [Xenopus tropicalis]
sw03916	153	245		357	410	1.0061	27	184		60	181
sw03925	9333	7875	0.9592	13823	12713	1.0393	16042	11570	1.5255	18792	6560	2.2803		No hits found
sw03927	10957	3901	2.3626	5800	6279	0.8212	6485	4846	1.5832	280	16495	0.0172		gi|87248093|gb|ABD36099.1| cuticle protein 3 [Bombyx mori]
sw03931	732	828	0.9049	532	464	1.3154	430	508	1.0087	378	553	0.9759		gi|50755651|ref|XP_414836.1| PREDICTED: similar to nuclear prelamin A recognition factor-like; protein related to Narf [Gallus gallus]
sw03932	323	371		447	361	1.3351	90	227		103	241			gi|20521011|dbj|BAA20807.3| KIAA0350 protein [Homo sapiens]
sw03933	15569	13024	0.9109	23328	17782	1.2426	18992	17436	1.1686	1142	18495	0.0553
sw03934	2335	2372	0.9651	1502	1587	1.0114	1102	905	1.5053	1745	2385	0.8164
sw03935	225	460	0.5645	155	359		218	220		32	249			gi|73968015|ref|XP_862887.1| PREDICTED: similar to Solute carrier family 2, facilitated glucose transporter, member 8 (Glucose transporter type 8) (Glucose transporter type X1) isoform 2 [Canis familiaris]
sw03938	1387	1439	1.0167	2076	1941	1.1161	1073	1223	1.0178	863	1454	0.7697		gi|66525368|ref|XP_392073.2| PREDICTED: similar to Colorectal mutant cancer protein (MCC protein) [Apis mellifera]
sw03939	360	456	0.9395	240	348		62	219		44	183
sw03941	290	408	0.985	345	449	0.9994	108	195		73	223			gi|28972634|dbj|BAC65733.1| mKIAA1116 protein [Mus musculus]
sw03942	269	403	0.8606	184	254		85	211		15	281			gi|33146309|dbj|BAC79426.1| fatty-acyl reductase [Bombyx mori]
sw03944	389	534	0.8358	669	826	0.854	720	865	0.9039	224	552	0.6711		gi|66509734|ref|XP_625075.1| PREDICTED: similar to MYST histone acetyltransferase 1 [Apis mellifera]
sw03946	328	428	0.9636	291	366		83	201		71	239			gi|24642254|ref|NP_573058.1| CG15601-PA [Drosophila melanogaster] CG15601-PA [Drosophila melanogaster]
sw03947	1817	2891	0.5804	1695	2226	0.7572	1193	2161	0.6178	820	1846	0.5462		No hits found
sw03949	17748	15167	1.0044	27327	19829	1.1775	19227	19235	0.8957	12945	21077	0.437		gi|22901742|gb|AAN10050.1| Y-box protein Ct-p50 [Chironomus tentans]
sw03951	722	447	1.9403	516	475	1.3487	928	415	2.8325	230	463	0.7869
sw03953	788	1018	0.9293	832	758	1.3438	1249	804	1.7056	942	691	1.931
sw03954	553	539	1.2612	691	810	1.0086	338	463	0.9487	963	537	2.4018		gi|72055852|ref|XP_798584.1| PREDICTED: similar to Protein C20orf116 homolog precursor [Strongylocentrotus purpuratus]
sw03955	253	392		370	449	1.0199	50	237		62	190			gi|82891374|ref|XP_917485.1| PREDICTED: similar to Dual specificity protein phosphatase CDC14A (CDC14 cell division cycle 14 homolog A) [Mus musculus]
sw03958	275	359		442	444	1.2875	83	196		109	257
sw03959	1570	1352	1.0957	1654	1251	1.412	1119	1114	1.2884	272	1624	0.2221		gi|1763687|gb|AAB39774.1| expanded [Drosophila melanogaster]
sw03960	222	334		419	471	0.9741	92	260		58	207			gi|45382049|ref|NP_990070.1| cTwist [Gallus gallus] cTwist [Gallus gallus]
sw03966	2411	2154	1.1857	2521	3324	0.7984	1381	2336	0.7049	2121	1930	1.2452		gi|19424210|ref|NP_598228.1| dapit protein [Rattus norvegicus] DAPIT protein [Rattus norvegicus]
sw03969	413	477	1.1245	512	466	1.4157	308	255		328	452	1.1761		gi|55238692|gb|EAA44103.2| ENSANGP00000023666 [Anopheles gambiae str. PEST] ENSANGP00000023666 [Anopheles gambiae str. PEST]
sw03975	817	1023	0.8186	921	1007	0.9736	1055	1576	0.7894	588	735	0.9513		gi|87248395|gb|ABD36250.1| ras-related GTP-binding protein 4b [Bombyx mori]
sw03977	2004	2215	0.9126	2521	2946	0.8732	1398	2289	0.6901	1494	2868	0.5164		gi|3687833|gb|AAC62236.1| notchless [Xenopus laevis]
sw03980	115	564	0.2772	31	146		52	233		7	274
sw03981	304	347		420	642	0.8102	387	811	0.5507	280	541	0.8702
sw03982	425	380	1.5518	433	516	1.0999	383	440	1.1507	274	366			gi|54636531|gb|EAL25934.1| GA15862-PA [Drosophila pseudoobscura]
sw03983	14678	10975	1.045	14019	13858	0.8991	10157	11849	1.0558	10540	15148	0.5181		gi|1311676|gb|AAB35931.1| La autoantigen homolog [Aedes albopictus] La protein homolog (La ribonucleoprotein) (La autoantigen homolog)
sw03984	9188	6348	1.1429	12520	11827	0.8686	7340	8869	0.9221	6983	7855	0.902		gi|16566713|gb|AAL26576.1| ribosomal protein L12 [Spodoptera frugiperda]
sw03985	2170	1901	1.1146	2152	2582	0.8411	1655	1989	0.8795	2209	2071	1.13
sw03991	507	536	0.9849	469	601	0.8914	220	432	0.705	179	343
sw03992	289	326		450	486	1.0001	108	199		66	169			gi|57506558|dbj|BAD86650.1| reverse transcriptase [Bombyx mori]
sw03995	251	304		372	440	1.023	98	235		34	220
sw04002	437	512	1.0056	467	448	1.2421	273	218		112	444	0.3779		gi|66516314|ref|XP_392551.2| PREDICTED: similar to GA12890-PA [Apis mellifera]
sw04004	565	780	0.7259	710	759	0.8945	440	843	0.5535	65	285			gi|55243915|gb|EAA06000.2| ENSANGP00000015052 [Anopheles gambiae str. PEST] ENSANGP00000015052 [Anopheles gambiae str. PEST]
sw04007	377	388		322	370		386	498	0.928	124	278			gi|74013305|ref|XP_850544.1| PREDICTED: similar to meteorin, glial cell differentiation regulator-like [Canis familiaris]
sw04010	616	790	0.8815	609	647	1.0633	525	622	0.8887	516	416	1.4298		gi|66533764|ref|XP_624412.1| PREDICTED: hypothetical protein XP_624409, partial [Apis mellifera]
sw04011	410	382	1.1646	438	631	0.7594	362	776	0.5598	305	299			gi|7657313|ref|NP_055277.1| Lsm1 protein [Homo sapiens] Lsm1 protein [Homo sapiens] Lsm1 protein [Homo sapiens] CaSm [Homo sapiens] U6 snRNA-associated Sm-like protein LSm1 (Small nuclear ribonuclear CaSm) (Cancer-associated Sm-like)
sw04021	3218	2081	1.3744	3080	2467	1.2252	3331	1443	2.261	3233	1985	1.5962		gi|72068741|ref|XP_790420.1| PREDICTED: similar to proteasome 26S non-ATPase subunit 2 [Strongylocentrotus purpuratus]
sw04022	500	702	0.8636	546	604	0.9869	442	539	0.9407	440	458	1.4301		gi|3688609|dbj|BAA33466.1| Fly Fas-associated factor (FFAF) [Drosophila melanogaster]
sw04023	1997	1992	0.8724	2073	1747	1.16	2064	2004	1.145	131	2120	0.0682		gi|57966866|ref|XP_562320.1| ENSANGP00000027535 [Anopheles gambiae str. PEST] ENSANGP00000027535 [Anopheles gambiae str. PEST]
sw04026	95	1099	0.1348	104	599	0.2604	85	291		129	219			gi|28316954|gb|AAO39498.1| RE51525p [Drosophila melanogaster]
sw04027	542	527	1.0193	598	502	1.2625	198	302		28	352			gi|76639355|ref|XP_881770.1| PREDICTED: similar to neurofilament, heavy polypeptide 200kDa isoform 3 [Bos taurus]
sw04028	6120	3740	1.2477	4010	4482	0.7633	2993	3569	0.8938	7810	2781	2.3849		gi|2970687|gb|AAC06038.1| beta-glucosidase precursor [Spodoptera frugiperda]
sw04032	626	777	0.7483	521	853	0.6089	697	770	1.0068	639	604	1.4577		gi|18204589|gb|AAH21208.1| Leucine zipper-EF-hand containing transmembrane protein 1 [Homo sapiens] leucine zipper-EF-hand containing transmembrane protein 1 [Homo sapiens] leucine zipper-EF-hand containing transmembrane protein 1 [Homo sapiens] LETM1 protein [Homo sapiens] Leucine zipper-EF-hand containing transmembrane protein 1, mitochondrial precursor
sw04039	11050	11673	0.7908	11442	12469	0.9566	19261	11384	1.5028	20565	9402	1.2554		gi|74000967|ref|XP_544762.2| PREDICTED: similar to stromal cell derived factor receptor 1 isoform b [Canis familiaris]
sw04041	1473	6176	0.2929	170	10510	0.0356	17	575	0.0662	44	2596	0.0319		gi|55243694|gb|EAA06762.2| ENSANGP00000019864 [Anopheles gambiae str. PEST] ENSANGP00000019864 [Anopheles gambiae str. PEST]
sw04042	359	388		504	842	0.8715	521	719	0.7435	217	414	0.7961		gi|82583075|gb|ABB84463.1| roughest protein [Drosophila melanogaster]
sw04052	3120	2870	1.1146	1962	2229	0.9707	3678	2185	1.6277	5521	2381	2.1947		gi|72009924|ref|XP_786491.1| PREDICTED: similar to ATPase type 13A [Strongylocentrotus purpuratus]
sw04054	1948	2773	0.7256	1957	3049	0.7244	2863	2854	1.1537	6330	2416	2.8127
sw04058	206	386		231	462	0.8441	155	318		114	256
sw04068	474	450	1.3434	598	575	1.3169	533	534	1.0496	381	408	1.3499		gi|66510581|ref|XP_396381.2| PREDICTED: similar to beta-tubulin cofactor A [Apis mellifera]
sw04069	223	298		234	427	0.889	371	237		86	301			gi|66509452|ref|XP_624892.1| PREDICTED: similar to sidestep [Apis mellifera]
sw04073	501	599	1.0811	442	643	0.9559	528	498	1.1228	112	552	0.3362		gi|881344|gb|AAC46610.1| nervous system antigen 2 nervana 2.2 antigen
sw04079	856	732	1.29	559	840	0.8552	726	411	2.0891	634	594	1.2604		gi|1402634|dbj|BAA11812.1| secretory component [Sarcophaga peregrina]
sw04083	17041	10489	1.1887	20935	13539	1.3539	20730	10818	1.8413	47053	3702	11.9798		gi|76618319|ref|XP_603752.2| PREDICTED: similar to Placental protein 11 precursor (PP11) [Bos taurus]
sw04084	359	400	1.1009	291	467	0.8103	464	688	0.667	333	381			gi|56788798|gb|AAH88474.1| WD40 protein Ciao1 (predicted) [Rattus norvegicus] WD40 protein Ciao1 (predicted) [Rattus norvegicus]
sw04086	13493	10424	1.0602	15794	18969	0.7208	9141	14570	0.619	15027	13433	0.9059		gi|54609271|gb|AAV34851.1| ribosomal protein L37A [Bombyx mori] ribosomal protein L37A [Spodoptera frugiperda]
sw04089	15919	13724	0.9964	21166	24034	0.8076	18017	20445	0.8763	18842	18791	0.7807		gi|54609205|gb|AAV34818.1| ribosomal protein L8 [Bombyx mori] ribosomal protein L8 [Mamestra brassicae] ribosomal protein L8 [Spodoptera frugiperda] 60S ribosomal protein L8 60S ribosomal protein L8
sw04090	311	587	0.6804	444	784	0.6556	352	478	0.8659	333	721	0.5885		gi|1136134|gb|AAC46955.1| DmORC2
sw04091	619	524	1.2907	398	612	0.8362	328	631	0.6811	508	468	1.31		gi|72092440|ref|XP_790987.1| PREDICTED: similar to peptide deformylase-like protein [Strongylocentrotus purpuratus]
sw04095	857	783	1.1175	533	576	1.1304	513	472	1.2921	812	961	0.9309		gi|38564423|ref|NP_942574.1| WD repeat domain 3 [Danio rerio] WD repeat domain 3 [Danio rerio]
sw04098	263	417	0.8568	367	511	0.9408	452	493	1.1194	381	523	1.0292		gi|89892016|gb|ABD78849.1| cytochrome P450 Cyp305B1 [Bombyx mori] cytochrome P450 CYP305B1V1 [Bombyx mandarina] cytochrome P450 [Bombyx mori]
sw04099	453	540	0.8684	170	326		112	240		74	205			gi|66518866|ref|XP_391884.2| PREDICTED: similar to ABC membrane transporter [Apis mellifera]
sw04102	640	605	1.1982	582	750	0.9329	724	543	1.5447	929	755	1.5532		gi|54639705|gb|EAL29107.1| GA20187-PA [Drosophila pseudoobscura]
sw04103	467	598	0.7919	288	289		324	268		240	360			gi|66553719|ref|XP_396577.2| PREDICTED: similar to serine/threonine protein kinase TAO1 [Apis mellifera]
sw04104	428	557	0.8569	543	590	0.9873	402	302	1.5916	467	850	0.6988		gi|4098987|gb|AAD00517.1| dMyc1 [Drosophila melanogaster]
sw04110	4800	3792	1.1361	5656	5768	0.9046	1870	2692	0.7171	4209	4057	0.9157		gi|62083383|gb|AAX62416.1| small nuclear ribonucleoprotein G [Lysiphlebus testaceipes]
sw04112	960	1052	0.8859	1045	1106	0.9205	993	939	1.0796	576	994	0.7094		gi|50733046|ref|XP_426001.1| PREDICTED: similar to PCAF [Gallus gallus]
sw04113	2316	2357	0.9357	2566	2803	0.9426	2552	2858	0.861	2171	3708	0.5457		No hits found
sw04114	419	536	0.9605	543	557	1.1497	162	336		192	557	0.5083		gi|1346296|sp|P98092|HMCT_BOMMO Hemocytin precursor (Humoral lectin) humoral lectin prepropeptide [Bombyx mori] hemocytin
sw04124	1411	976	1.4634	1651	1344	1.1527	1278	1247	1.0759	1237	1183	1.0849		No hits found
sw04129	218	310		213	389		117	233		255	426	0.8824		gi|68362886|ref|XP_697873.1| PREDICTED: similar to neural stem cell-derived dendrite regulator [Danio rerio]
sw04131	254	417	0.7403	190	296		119	188		98	212			gi|40645044|dbj|BAD06416.1| cortactin [Homo sapiens]
sw04133	1691	1911	0.9407	1843	1908	1.0242	1379	1255	1.1839	1048	1487	0.8038		gi|55241598|gb|EAA08488.2| ENSANGP00000014719 [Anopheles gambiae str. PEST] ENSANGP00000014719 [Anopheles gambiae str. PEST]
sw04134	941	1311	0.7781	935	1409	0.6991	648	754	1.0397	814	1866	0.5635		gi|28381019|gb|AAO41476.1| GH07384p [Drosophila melanogaster]
sw04135	447	527	0.9809	219	427	0.6821	164	315		44	387			gi|50748275|ref|XP_426430.1| PREDICTED: similar to papilin [Gallus gallus]
sw04136	678	1459	0.4754	376	1149	0.3526	231	417	0.6719	149	667	0.3947		gi|25012376|gb|AAN71297.1| RE10019p [Drosophila melanogaster]
sw04137	19284	17069	0.9611	28783	18067	1.359	25756	15404	1.5782	3074	15336	0.1505		gi|66517541|ref|XP_393694.2| PREDICTED: similar to CG32171-PD, isoform D [Apis mellifera]
sw04138	866	947	1.017	1000	1134	0.9709	422	334	1.6323	692	612	1.5869		gi|8572742|gb|AAF77184.1| SNS [Drosophila melanogaster]
sw04141	1078	1394	0.8627	1173	1645	0.7794	829	1112	0.7928	986	1839	0.5867		gi|72171252|ref|XP_784358.1| PREDICTED: similar to cirrhosis, autosomal recessive 1A (cirhin), partial [Strongylocentrotus purpuratus]
sw04142	3599	3499	0.9831	3988	4385	0.8958	1967	2258	0.9804	2932	4878	0.6425		gi|6433838|emb|CAB60723.1| DNop5 protein [Drosophila melanogaster]
sw04143	342	321		330	358		732	643	1.3734	191	222			gi|48139951|ref|XP_397062.1| PREDICTED: similar to GA17592-PA [Apis mellifera]
sw04144	1531	1226	1.2032	1896	1332	1.3779	2585	1801	1.6235	1656	1617	1.0596		gi|25992174|gb|AAN77090.1| masquerade-like serine proteinase homolog [Bombyx mori]
sw04148	621	1710	0.3524	640	1153	0.54	465	707	0.8174	186	583	0.5553		gi|55583303|dbj|BAD69569.1| aquaporin [Bombyx mori]
sw04150	391	572	0.8476	706	792	1.0566	501	639	0.9646	349	643	0.797		gi|179415|gb|AAA75007.1| basic fibroblast growth factor receptor protein
sw04151	228	318		343	403	1.0807	18	179		42	162
sw04152	2525	1871	1.237	3341	2772	1.1199	1753	2129	0.9346	692	3126	0.2465
sw04153	139	253		199	408	0.6892	23	174		33	209			gi|87248201|gb|ABD36153.1| phospholipid scramblase [Bombyx mori]
sw04154	1036	1141	1.0168	2116	1894	1.2291	2723	2073	1.3942	7147	681	11.9504		gi|87248571|gb|ABD36338.1| phosphoribosyl pyrophosphate synthetase [Bombyx mori]
sw04155	421	487	1.016	422	441	1.1755	141	300		103	265			gi|33636497|gb|AAQ23546.1| RE64686p [Drosophila melanogaster]
sw04160	338	341		440	410	1.2017	274	359		81	270
sw04163	339	438	0.9186	438	513	0.9874	136	284		57	203			gi|62473231|ref|NP_001014700.1| shaven CG11049-PE, isoform E [Drosophila melanogaster] CG11049-PE, isoform E [Drosophila melanogaster]
sw04166	643	669	1.1988	695	749	1.142	425	706	0.8092	153	804	0.3309
sw04167	347	406	1.0223	489	516	1.0924	74	202		187	179
sw04172	285	361		172	281		102	400	0.5276	159	260			gi|62652059|ref|XP_235093.3| PREDICTED: similar to SMILE protein [Rattus norvegicus]
sw04174	340	408	1.153	444	484	1.2127	282	359		217	314			gi|66548951|ref|XP_395258.2| PREDICTED: similar to cisplatin resistance-associated overexpressed protein [Apis mellifera]
sw04176	225	400	0.6879	201	459	0.5147	198	249		111	355
sw04178	1610	1366	1.2883	2677	2555	1.0645	1646	2252	0.7928	1931	1876	1.0895		gi|56118855|ref|NP_001008083.1| MGC79802 protein [Xenopus tropicalis] MGC79802 protein [Xenopus tropicalis]
sw04182	290	479	0.7849	308	398		210	317		216	494	0.6768		gi|22474519|dbj|BAC10623.1| PM-Scl autoantigen-like protein [Bombyx mori] PM-Scl autoantigen-like protein [Bombyx mori]
sw04187	324	441	0.8108	376	464	0.9739	99	181		52	243			gi|50731742|ref|XP_425925.1| PREDICTED: similar to zinc finger homeodomain 4 [Gallus gallus]
sw04192	1060	1215	0.818	1376	1651	0.7779	422	833	0.6011	1451	531	4.3957		gi|945383|gb|AAC41580.1| carboxypeptidase Vitellogenic carboxypeptidase precursor
sw04193	598	799	0.8238	403	467	1.0698	334	455	0.92	172	328			gi|68395350|ref|XP_683219.1| PREDICTED: similar to glutamate receptor, metabotropic 1 [Danio rerio]
sw04197	1313	1417	0.9338	1342	1597	0.8667	1423	1540	1	1808	1554	1.3032		gi|56673106|gb|AAW19648.1| 30kDa protein [Danio rerio]
sw04200	639	551	1.1766	611	454	1.4143	754	617	1.3197	462	474	1.3909		gi|50752699|ref|XP_413717.1| PREDICTED: similar to thyroid hormone receptor interactor 4; thyroid receptor interacting protein 4; activating signal cointegrator 1 [Gallus gallus]
sw04203	8383	6076	1.016	8192	5960	1.2427	7689	4917	1.6564	16263	6049	2.1263
sw04207	2270	2481	0.7998	2056	2217	0.8979	2501	2759	0.9668	995	1993	0.5707		gi|54696354|gb|AAV38549.1| protein phosphatase 1, catalytic subunit, beta isoform [Homo sapiens] protein phosphatase 1 catalytic subunit beta isoform [synthetic construct]
sw04209	596	804	0.7723	438	502	1.0352	499	340	1.7903	76	445	0.3801		gi|30179022|gb|EAA03645.2| ENSANGP00000004035 [Anopheles gambiae str. PEST] ENSANGP00000004035 [Anopheles gambiae str. PEST]
sw04217	630	608	1.0796	348	481	0.8918	175	289		271	268
sw04218	768	1038	0.8508	934	660	1.4665	1142	694	1.7758	1238	811	1.9313		gi|72049886|ref|XP_801978.1| PREDICTED: similar to adaptor-related protein complex 1 beta 1 subunit isoform b isoform 6 [Strongylocentrotus purpuratus]
sw04221	673	645	1.0799	326	396		82	249		197	359			gi|28416345|gb|AAO42645.1| LD34250p [Drosophila melanogaster]
sw04222	1222	1529	0.8759	1788	1561	1.1081	1083	1135	1.0115	239	1385	0.2475		gi|5815231|gb|AAD52607.1| unknown [Drosophila melanogaster]
sw04229	726	1157	0.7715	566	1189	0.6989	575	901	0.6935	465	782	0.8411		gi|89112791|gb|ABD60989.1| Hsp70/Hsp90 organizing protein-like protein [Glossina morsitans morsitans]
sw04230	1186	1291	1.086	1165	1765	0.8729	1093	1720	0.6433	1035	1189	0.9792		gi|87248299|gb|ABD36202.1| COMMD4 protein [Bombyx mori]
sw04233	275	480	0.8407	207	559	0.6735	144	347		72	270			gi|55244651|gb|EAA05257.3| ENSANGP00000018469 [Anopheles gambiae str. PEST] ENSANGP00000018469 [Anopheles gambiae str. PEST]
sw04236	504	855	0.7514	648	946	0.9398	989	1306	0.7099	306	560	0.8258		gi|56789029|gb|AAH87941.1| 9130227C08Rik protein [Mus musculus]
sw04237	1661	2352	0.7968	1605	1822	1.0758	2178	1185	1.9252	4296	1475	3.1844		gi|27542790|gb|AAO16877.1| wunen-trimeric MYC tag fusion protein [synthetic construct]
sw04240	904	1036	1.0595	1203	1831	0.8172	1164	1594	0.6753	973	900	1.1964		gi|87248553|gb|ABD36329.1| nuclear migration protein nudC [Bombyx mori]
sw04244	615	646	1.2269	832	1128	0.8627	447	785	0.6116	324	508	0.848		gi|72133877|ref|XP_788695.1| PREDICTED: similar to predicted CDS, reverse transcriptase family member (1O881) [Strongylocentrotus purpuratus]
sw04247	176	339		255	401	1.0299	72	340		34	283
sw04252	6750	5585	1.1337	3598	5324	0.6986	9914	9588	1.0568	255	4126	0.0692		gi|1934852|emb|CAA73031.1| putative organic cation transporter [Drosophila melanogaster]
sw04254	1195	1228	1.1095	937	849	1.3914	983	857	1.4222	88	857	0.1821		gi|27819785|gb|AAO24941.1| RE65015p [Drosophila melanogaster]
sw04255	305	353		295	417	1.101	275	235		348	267
sw04259	609	809	0.8566	352	623	0.7956	790	955	0.96	117	975	0.1472		gi|66545439|ref|XP_392229.2| PREDICTED: similar to GA18075-PA [Apis mellifera]
sw04267	1002	1235	0.8631	863	1152	0.8979	1189	1217	1.0763	837	1418	0.5892		gi|50756277|ref|XP_415090.1| PREDICTED: similar to tRNA pseudouridine synthase A (Pseudouridylate synthase I) (Pseudouridine synthase I) (Uracil hydrolyase) [Gallus gallus]
sw04268	411	512	0.9809	555	727	0.9164	279	506	0.6087	440	749	0.7329		gi|60677817|gb|AAX33415.1| RE47565p [Drosophila melanogaster]
sw04271	8243	9881	0.6757	9012	9210	0.9916	7123	8726	0.8464	5697	10989	0.3937		gi|87248371|gb|ABD36238.1| nucleosome assembly protein [Bombyx mori]
sw04273	441	558	1.0309	354	580	0.8583	433	360	1.41	209	465	0.6812		gi|25072201|ref|NP_739563.1| oocyte-testis gene 1 [Mus musculus] Protein C10orf118 homolog (Oocyte-testis gene 1 protein) oocyte-testis gene 1 [Mus musculus]
sw04274	1124	1010	1.2688	1174	1108	1.1698	621	868	0.7562	986	885	1.2505		gi|72013455|ref|XP_783496.1| PREDICTED: similar to G kinase anchoring protein 1 [Strongylocentrotus purpuratus]
sw04275	1018	1000	1.007	983	1259	0.8515	1247	1206	1.048	974	1084	0.9808
sw04276	444	579	0.875	411	586	0.8301	139	259		119	2422	0.0487		gi|4090964|gb|AAD09279.1| immune-related Hdd1 [Hyphantria cunea]
sw04277	933	1074	0.9985	838	1157	0.8824	1052	1155	0.917	737	1052	0.8409		gi|66522059|ref|XP_624043.1| PREDICTED: similar to Syndecan binding protein (syntenin) [Apis mellifera]
sw04282	498	649	0.9544	568	705	0.9456	628	747	0.9274	428	487	1.1506		gi|82933678|ref|XP_356529.4| PREDICTED: zinc and ring finger 3 isoform 1 [Mus musculus] PREDICTED: zinc and ring finger 3 isoform 2 [Mus musculus]
sw04283	449	366	1.4343	134	345		306	283		325	449	0.9277
sw04284	430	567	0.8695	661	596	1.189	1541	844	1.6603	2819	631	4.9711		gi|72143291|ref|XP_797528.1| PREDICTED: similar to solute carrier family 27 (fatty acid transporter), member 4 [Strongylocentrotus purpuratus]
sw04285	3128	4104	0.7369	4408	5188	0.8748	6438	5641	1.1023	4499	2498	1.606		gi|76362269|dbj|BAE45263.1| cytosolic nonspecific dipeptidase [Oreochromis niloticus]
sw04287	502	609	0.8991	500	645	0.9539	254	792	0.4449	18	603	0.0838		gi|71418327|ref|XP_810818.1| mucin TcMUCI [Trypanosoma cruzi strain CL Brener] mucin TcMUCI, putative [Trypanosoma cruzi]
sw04290	398	436	1.1454	437	374	1.484	123	278		441	244	2.7983
sw04291	1415	1228	1.0558	1855	1742	1.0887	2082	1685	1.2688	1236	865	1.6259		gi|50512854|gb|AAS93901.1| glycogen phosphorylase [Crassostrea gigas]
sw04295	429	431	1.0923	170	242		62	129		50	190			gi|402174|emb|CAA52906.1| beta-tubulin [Bombyx mori] Tubulin beta chain (Beta tubulin)
sw04296	599	785	0.7886	651	489	1.3817	709	610	1.2541	177	601	0.4032		gi|62659557|ref|XP_222780.3| PREDICTED: similar to Ras GTPase-activating protein nGAP (RAS protein activator like 1) [Rattus norvegicus]
sw04297	377	493	0.9563	248	477	0.758	246	318		145	297
sw04307	215	276		279	405	0.9291	173	335		164	361
sw04310	1683	1805	0.9421	1501	1181	1.372	762	751	1.2297	1005	1234	0.9943		gi|66566277|ref|XP_395512.2| PREDICTED: similar to eyelid [Apis mellifera]
sw04314	378	455	1.0484	198	238		76	182		117	171			gi|73990038|ref|XP_534258.2| PREDICTED: similar to calpain 7 isoform 1 [Canis familiaris]
sw04317	297	326		291	438	0.939	128	225		48	231			gi|76621359|ref|XP_590703.2| PREDICTED: similar to putative NFkB activating protein isoform 1 [Bos taurus]
sw04327	321	325		264	405	0.869	212	156		67	245			gi|11228711|gb|AAG33131.1| matrix metalloproteinase 1 [Drosophila melanogaster]
sw04330	2850	2904	0.9608	3476	2653	1.367	5986	2011	3.3627	823	2082	0.5071		gi|13786144|ref|NP_112614.1| prolyl endopeptidase [Rattus norvegicus] rPOP [Rattus norvegicus]
sw04331	1414	1240	1.182	1720	1472	1.2388	1568	1464	1.2435	1138	1220	1.1091		gi|66505260|ref|XP_396597.2| PREDICTED: similar to UPF2 regulator of nonsense transcripts homolog [Apis mellifera]
sw04333	11220	12647	0.7855	15409	8559	1.6153	14102	7347	1.9057	1828	12087	0.1187		gi|29134779|dbj|BAC66140.1| projectin [Procambarus clarkii]
sw04339	3196	3308	0.8329	2543	2409	1.0732	4029	2817	1.7986	3301	2011	1.469		gi|54638043|gb|EAL27445.1| GA17412-PA [Drosophila pseudoobscura]
sw04341	238	943	0.3372	105	199		21	180		18	329			gi|72172203|gb|AAZ66799.1| lipase [Samia cynthia ricini] lipase-1 [Bombyx mori] lipase [Bombyx mori]
sw04342	3128	4295	0.7218	3096	3772	0.8558	2197	3458	0.7352	2398	2799	0.9295		gi|54643209|gb|EAL31953.1| GA10697-PA [Drosophila pseudoobscura]
sw04343	786	1427	0.5568	420	992	0.4657	314	792	0.5191	151	666	0.3651		gi|13325124|gb|AAH04375.1| 24-dehydrocholesterol reductase [Homo sapiens] 24-dehydrocholesterol reductase precursor [Homo sapiens] 3beta-hydroxysterol delta 24 reductase [Homo sapiens] seladin-1 [Homo sapiens] 24-dehydrocholesterol reductase, precursor [Homo sapiens] 24-dehydrocholesterol reductase precursor (3-beta-hydroxysterol delta-24-reductase) (Seladin-1) (Diminuto/dwarf1 homolog)
sw04344	5854	5465	0.8528	8127	9239	0.7575	3606	6485	0.691	7561	6022	1.0949		gi|42412381|gb|AAS15570.1| class III alcohol dehydrogenase [Oryzias latipes]
sw04346	262	370		446	546	1.0265	31	150		39	193			gi|55246813|gb|EAA02972.3| ENSANGP00000001797 [Anopheles gambiae str. PEST] ENSANGP00000008574 [Anopheles gambiae str. PEST] ENSANGP00000008574 [Anopheles gambiae str. PEST] ENSANGP00000001797 [Anopheles gambiae str. PEST]
sw04349	1196	1830	0.7595	1459	2250	0.6837	1457	1839	0.8403	183	1971	0.1077		gi|66508930|ref|XP_624461.1| PREDICTED: similar to CG12026-PA, isoform A, partial [Apis mellifera]
sw04353	593	847	0.8323	552	777	0.8362	832	733	1.3277	1242	522	2.7068
sw04359	1372	1213	1.0877	1357	1126	1.2673	1052	681	2.0373	999	922	1.1883		gi|45501218|gb|AAH67100.1| FAS-associated factor 1, isoform a [Homo sapiens] FAS-associated factor 1, isoform a [Homo sapiens] FAS-associated factor 1 isoform a [Homo sapiens] Fas-associated protein factor FAF1 [Homo sapiens] Fas (TNFRSF6) associated factor 1 [Homo sapiens] Fas (TNFRSF6) associated factor 1 [Homo sapiens] Fas (TNFRSF6) associated factor 1 [Homo sapiens] CGI-03 protein [Homo sapie…
sw04361	315	390		419	566	0.9338	170	319		289	371			gi|46249482|gb|AAH68670.1| MGC81062 protein [Xenopus laevis] Sld5 [Xenopus laevis]
sw04363	4611	5935	0.6512	5699	4795	1.1125	2579	3049	1.0104	1417	4274	0.2881
sw04364	1525	1317	1.0938	1965	2244	0.787	964	1834	0.6117	2945	1258	3.4234		gi|87248227|gb|ABD36166.1| short-chain dehydrogenease/reductase 2 [Bombyx mori]
sw04365	1572	1179	1.3972	1821	1449	1.3527	1226	984	1.4533	1246	1419	0.952		gi|7657611|ref|NP_055095.1| DnaJ (Hsp40) homolog, subfamily C, member 8 [Homo sapiens] SPF31 [Homo sapiens]
sw04367	288	387		339	405	1.0193	147	380		74	187			gi|68367394|ref|XP_694073.1| PREDICTED: similar to transforming acidic coiled coil 1a [Danio rerio]
sw04368	3131	2377	1.1559	3462	1972	1.6953	5332	1279	4.0295	219	2138	0.0978
sw04372	998	909	1.0628	1153	1095	1.0289	699	549	1.4541	612	576	1.5488		gi|3132524|gb|AAD09205.1| Ahr homolog spineless; bHLH-PAS transcription factor spineless [Drosophila melanogaster]
sw04376	341	415	0.947	326	385		229	408	0.7943	177	435	0.6733		gi|27695046|gb|AAH43695.1| RNA-binding region (RNP1, RRM) containing 3 [Mus musculus] RNA-binding region (RNP1, RRM) containing 3 [Mus musculus] RNA-binding region (RNP1, RRM) containing 3 [Mus musculus]
sw04377	1414	1731	0.8569	1691	1669	1.0231	3316	1624	1.8846	4703	1573	2.8019		gi|27733421|gb|AAO21508.1| serine protease-like protein [Manduca sexta]
sw04379	2049	1314	1.4314	2601	2064	1.2078	7720	1207	7.5976	81	1857	0.0657		gi|79317517|ref|NP_001031018.1| transporter [Arabidopsis thaliana] transporter [Arabidopsis thaliana] At1g10390/F14N23_29 [Arabidopsis thaliana] At1g10390/F14N23_29 [Arabidopsis thaliana]
sw04380	353	398		302	497	0.6793	229	335		236	708	0.4424		gi|34785909|gb|AAH57757.1| MGC69150 protein [Xenopus laevis] Methionyl-tRNA synthetase (Methionine--tRNA ligase) (MetRS)
sw04381	207	341		314	478	0.842	194	416	0.6654	254	418	0.9901
sw04383	3820	2475	1.3277	2791	2378	1.1224	1916	1176	1.8585	1997	3603	0.5874		gi|11036458|gb|AAG27134.1| HIV-1 Vpr-binding protein [Homo sapiens]
sw04384	316	383		400	381	1.2004	78	227		58	230
sw04387	969	3425	0.2739	156	247		346	364		153	1261	0.1842		gi|39579351|emb|CAE56519.1| Hypothetical protein CBG24242 [Caenorhabditis briggsae]
sw04389	450	504	1.0356	497	627	0.9348	420	536	0.9558	251	334			gi|2570798|gb|AAB82275.1| cyclin H [Drosophila melanogaster]
sw04392	1653	1480	0.9796	2138	1796	1.0517	1133	1353	0.8383	1407	1879	0.7617		gi|25012339|gb|AAN71280.1| RE04093p [Drosophila melanogaster]
sw04393	316	542	0.7118	372	522	0.8689	203	390		291	403	1.0262		gi|5901816|gb|AAD55416.1| BcDNA.GH04922 [Drosophila melanogaster]
sw04396	544	475	1.1887	661	590	1.1198	412	491	0.956	1072	571	2.3853		gi|695387|gb|AAC37254.1| luciferase luciferase
sw04397	3779	4440	0.8016	5059	5872	0.7865	1844	3942	0.5132	1194	4459	0.3261		gi|87248141|gb|ABD36123.1| glucosamine-6-phosphate N-acetyltransferase [Bombyx mori]
sw04398	1875	2926	0.6794	2117	2787	0.7549	1480	2094	0.7415	1398	3045	0.4599		gi|51259477|gb|AAH79397.1| Hypothetical protein LOC361452 [Rattus norvegicus] hypothetical protein LOC361452 [Rattus norvegicus]
sw04404	516	425	1.2437	464	522	0.9048	265	519	0.631	96	600	0.2845		gi|66522495|ref|XP_393918.2| PREDICTED: similar to subtilisin-related protease SPC3 [Apis mellifera]
sw04407	627	677	0.8927	638	582	1.1416	251	351		391	246			gi|67597684|ref|XP_666163.1| myosin heavy chain [Cryptosporidium hominis TU502] myosin heavy chain [Cryptosporidium hominis]
sw04412	1048	970	0.9857	1577	1003	1.3655	808	704	1.2772	152	1192	0.1946		gi|6272693|gb|AAF06164.1| long microtubule-associated protein 1A; long MAP1A [Mus musculus] Microtubule-associated protein 1A (MAP 1A)
sw04416	994	1071	0.8323	533	565	0.9353	369	438	1.0237	297	489	0.9413
sw04417	921	1083	0.9989	1209	1430	1.0727	1268	1478	0.872	1233	672	2.2787		gi|26985165|gb|AAN86250.1| caspase-1 [Bombyx mori]
sw04420	200	410	0.7899	291	440	1.0748	114	273		109	239
sw04421	1756	1542	1.2339	1649	1376	1.4237	1165	1000	1.2438	1105	1899	0.7087
sw04422	1437	1919	0.8628	1435	2195	0.852	2217	2915	0.79	1182	1595	0.8227		gi|87248473|gb|ABD36289.1| chromatin modifying protein 1b [Bombyx mori]
sw04425	696	974	0.8769	478	882	0.8163	803	1004	0.8529	1258	473	3.3647		gi|15080238|gb|AAH11888.1| Solute carrier family 35, member B1 [Homo sapiens]
sw04427	339	508	0.9821	305	695	0.7353	586	738	0.8722	444	460	1.4057		gi|72080273|ref|XP_793341.1| PREDICTED: similar to LanC lantibiotic synthetase component C-like 3 [Strongylocentrotus purpuratus]
sw04428	1249	1920	0.7119	1225	1628	0.9441	1595	2005	0.736	1481	1312	1.1401		gi|27374204|gb|AAN87276.1| CG13533 [Drosophila virilis]
sw04429	7854	9171	0.8189	8011	7600	1.1349	7104	6969	0.9585	4008	8388	0.5293
sw04432	329	586	0.7868	409	504	1.2284	363	403	1.064	812	568	1.7189		gi|54636561|gb|EAL25964.1| GA15879-PA [Drosophila pseudoobscura]
sw04436	1373	1207	1.2964	1417	1897	0.8266	1502	1859	0.7869	1261	1413	0.9583		gi|72013764|ref|XP_784928.1| PREDICTED: similar to Translation initiation factor eIF-2B epsilon subunit (eIF-2B GDP-GTP exchange factor) [Strongylocentrotus purpuratus]
sw04439	141	375		178	396		305	590	0.6299	102	317			gi|71360948|emb|CAJ19740.1| beclin 1 [Drosophila yakuba]
sw04444	229	350		328	454	1.0386	395	355		202	245			gi|68388361|ref|XP_698034.1| PREDICTED: similar to Protein KIAA0759 [Danio rerio]
[truncated: 6,672 more rows]
