# Supplementary material for: Microarray Analysis of the Juvenile Hormone Response in Larval Integument of the Silkworm, Bombyx mori
Source: Int J Genomics. 2014 Apr 6;2014:426025. doi: 10.1155/2014/426025 (PMC3997853; doi:10.1155/2014/426025)
Supplement: Supplementary file 1 — Supplementary Figure 1: Hierarchical clustering of a total of 8,670 genes expressed in the silkworm integument samples. A gene was considered to be expressed in a integument sample if its expression signal intensity was greater than 400 units. Supplementary Table 1: All real time RT-PCR primers used in this study. Supplementary Table 2: The list of 8,670 genes expressed in the silkworm integument samples. Integument-E: the integument sample treated with JHA methoprene. Integument-C: the integument sample treated with pure acetone. Supplementary Table 3: The list of 2,143 JHA-modulated genes with 2.0-fold expression change after JHA application. Supplementary Table 4: Correlation between microarray data and real time RT-PCR results. A good correlation was defined if the Pearson correlation coefficient (r) is greater than 0.7. Supplementary Table 5: All KEGG pathways that JHA-modulated genes were involved in. Supplementary Table 6: Coexpression classes of all JHA-modulated genes. Supplementary Table 7: JHA-induced genes that contain the binding motifs of Kr-h1 in their upstream UTR regions. Supplementary Table 8: JHA-modulated genes that are involved in each KEGG pathway. [file 426025.f1.zip › Supplementary materials/Table S3.xls]

## Sheet: Integument-2.0-fold
Table S3 JHA-modulated genes with 2.0-fold change after JHA application
Name	Cy5 Intensity (Integument-E-12 Hat)	Cy3 Intensity (Integument-C-12 Hat))	ratio-I-12 Hat	Cy5 Intensity (Integument-E-24 Hat)	Cy3 Intensity (Integument-C-24 Hat)	ratio-I-24 Hat	Cy5 Intensity (Integument-E-36 Hat)	Cy3 Intensity (Integument-C-36 Hat)	ratio-I-36 Hat	Cy5 Intensity (Integument-E-48 Hat)	Cy3 Intensity (Integument-C-48 Hat)	ratio-I-48 Hat		Probe Annotation
sw00003	12389	9853	1.0362	13981	15500	0.918	17483	19752	0.8284	674	19044	0.0398		gi|87248661|gb|ABD36383.1| protease inhibitor 1 [Bombyx mori]
sw00036	2483	2358	1.0221	3206	3513	0.9235	3617	3931	0.8418	4207	2030	2.4974
sw00037	417	420	1.3732	273	446	0.9525	464	277	2.0387	1325	575	2.3161
sw00062	1189	1582	0.824	652	759	0.993	303	403	0.9378	244	927	0.3354		gi|2564721|gb|AAB81850.1| chitinase [Aedes aegypti]
sw00073	751	728	1.1435	608	689	1.0571	512	369	1.4971	2775	632	4.8787		gi|2506798|sp|P08922|ROS_HUMAN Proto-oncogene tyrosine-protein kinase ROS precursor (c-ros-1) transmembrane tyrosine-specific protein kinase precursor
sw00076	1680	1674	0.9134	2260	1219	1.6238	2314	1049	2.0803	1239	2185	0.5711		gi|40675335|gb|AAH64870.1| Nolc1-prov protein [Xenopus tropicalis]
sw00085	1113	1262	0.9039	1162	1166	1.1207	786	772	1.0727	179	909	0.2625		gi|86563230|ref|NP_001033372.1| T15B12.1b [Caenorhabditis elegans]
sw00098	11556	8638	1.1537	13650	10627	1.2666	9584	8494	1.3083	2676	8270	0.342
sw00110	527	797	0.7625	517	816	0.7189	433	1056	0.4989	2661	538	5.8911		gi|20129297|ref|NP_609080.1| CG10806-PB, isoform B [Drosophila melanogaster] CG10806-PB, isoform B [Drosophila melanogaster]
sw00118	1480	2012	0.7784	1737	2063	0.922	1111	1723	0.7725	289	1219	0.3256		gi|54643924|gb|EAL32667.1| GA17712-PA [Drosophila pseudoobscura]
sw00125	4653	3698	1.2972	4788	3259	1.6627	4201	2027	2.2995	4142	3908	1.0473		gi|20151563|gb|AAM11141.1| LD15253p [Drosophila melanogaster]
sw00132	3210	2682	1.0479	5308	4086	1.1632	3850	3301	1.2562	14587	2496	8.7852		gi|17552910|ref|NP_498263.1| ALdehyde deHydrogenase family member (alh-9) [Caenorhabditis elegans] Putative aldehyde dehydrogenase family 7 member A1 homolog
sw00137	331	378		1201	599	2.3653	31	375		28	404	0.2751		gi|87248419|gb|ABD36262.1| larval cuticle protein [Bombyx mori]
sw00139	934	1180	0.7878	1030	956	1.1581	185	410	0.6578	109	1030	0.1291		gi|1706194|sp|P80683|CUA3A_TENMO Larval cuticle protein A3A (TM-A3A) (TM-LCP A3A)
sw00148	11567	11727	0.7078	15986	13577	0.9539	10879	15931	0.7822	5153	11616	0.3924		gi|45550893|ref|NP_652593.3| CG31676-PA [Drosophila melanogaster] RH34376p [Drosophila melanogaster] CG31676-PA [Drosophila melanogaster]
sw00149	2854	1880	1.4097	4097	3123	1.2048	8527	3292	2.3478	13878	801	13.5394		gi|60677859|gb|AAX33436.1| RE32747p [Drosophila melanogaster]
sw00177	341	419	0.9246	279	358		2454	256	8.642	29	447	0.2075		gi|6560647|gb|AAF16701.1| putative cuticle protein [Manduca sexta]
sw00203	7582	5042	1.3477	8130	7234	1.2305	9375	7766	1.1272	1371	8550	0.1603		gi|34100930|gb|AAQ57577.1| troponin C 73F [Drosophila virilis]
sw00210	665	926	0.8701	613	888	0.9073	909	987	1.1177	1082	703	2.0338
sw00214	793	912	1.0498	985	1200	1.0035	1193	722	2.1127	740	633	1.6496
sw00288	506	940	0.5574	862	1372	0.6258	92	558	0.2302	39	952	0.0778		gi|25012317|gb|AAN71270.1| LP05231p [Drosophila melanogaster]
sw00299	748	1025	0.752	493	890	0.5903	452	977	0.5338	497	1424	0.4627		gi|66509665|ref|XP_397030.2| PREDICTED: similar to bystin [Apis mellifera]
sw00304	272	338		350	624	0.6467	314	216		1928	518	4.1314		gi|89268696|emb|CAJ82714.1| very low density lipoprotein receptor [Xenopus tropicalis]
sw00305	3730	4016	0.9702	4933	6224	0.7912	3770	3938	1.0436	12718	2559	5.3804		gi|66511664|ref|XP_392823.2| PREDICTED: similar to elongation factor Tu GTP binding domain containing 1, partial [Apis mellifera]
sw00306	6488	7933	0.7718	6233	6392	0.9803	5341	4832	1.1717	11017	4136	2.4718		gi|87248239|gb|ABD36172.1| transketolase [Bombyx mori]
sw00348	13106	15441	0.5893	21677	24381	0.6964	6908	22523	0.3592	3904	13921	0.2348
sw00355	3108	2790	0.9389	2081	2090	0.9675	1734	1907	0.9667	454	2031	0.2821		gi|41349770|dbj|BAD08319.1| decapentaplegic protein [Athalia rosae]
sw00358	20520	23017	0.7761	21282	18133	0.9685	12017	15128	0.8499	7577	22226	0.2946		gi|80475047|gb|AAI09118.1| ARS2 protein [Homo sapiens]
sw00359	4551	3322	1.0986	4199	4088	0.9569	3928	3305	1.2574	804	4802	0.1835		gi|17298115|dbj|BAB78526.1| wing disc-specific protein [Bombyx mori]
sw00360	4586	2822	1.2966	4925	6762	0.5776	2184	7263	0.3032	220	3965	0.0558
sw00365	1002	1137	0.9109	1354	1335	1.0693	1234	955	1.4063	4013	748	5.3138		gi|66559548|ref|XP_625036.1| PREDICTED: similar to novel protein similar to vertebrate phosphoribosylformylglycinamidine synthase (FGAR amidotransferase) (PFAS) [Apis mellifera]
sw00373	2682	2016	1.203	2788	1845	1.4827	2051	800	2.5694	3191	1213	2.4848
sw00382	3467	2259	1.5054	3669	2563	1.3271	3062	2512	1.2752	10744	1783	6.1991		gi|87248199|gb|ABD36152.1| perilipin [Bombyx mori]
sw00400	319	488	0.9546	530	776	0.9637	390	693	0.5818	1126	381	3.44
sw00403	1873	2474	0.8251	1577	2148	0.8795	1724	2499	0.7257	616	1783	0.4305		gi|68354396|ref|XP_693392.1| PREDICTED: similar to amyloid beta (A4) precursor protein-binding, family B, member 2, partial [Danio rerio]
sw00423	1171	1139	1.0808	906	1211	0.8895	1716	781	2.312	1039	1367	0.7556
sw00442	7173	8304	0.7455	7205	5957	1.1637	5338	5621	1.0172	3148	7341	0.3836
sw00454	759	792	1.0575	546	592	1.1163	649	647	1.1578	894	523	2.2293		gi|55243652|gb|EAA06471.2| ENSANGP00000019414 [Anopheles gambiae str. PEST] ENSANGP00000019414 [Anopheles gambiae str. PEST]
sw00457	1945	1546	1.2228	3517	2744	1.3074	3586	2760	1.312	4052	1893	2.1181		gi|56270469|gb|AAH87416.1| LOC496023 protein [Xenopus laevis]
sw00464	5406	4263	1.0265	8508	4763	1.4542	7451	4027	1.7368	8727	3672	2.0546		gi|83423461|dbj|BAE54254.1| transitional endoplasmic reticulum ATPase TER94 [Bombyx mori]
sw00469	30754	19144	1.1391	42061	43779	0.8579	36510	32574	1.2431	57726	7185	5.9592
sw00474	1865	2721	0.6693	2688	2002	1.3992	890	1155	0.8964	211	2027	0.1146
sw00502	913	639	1.7101	934	1069	1.0065	439	858	0.6595	1143	465	3.2921		gi|56378317|dbj|BAD74195.1| heat shock protein hsp 19.9 [Bombyx mori]
sw00506	1044	1123	1.043	1220	1285	1.0822	331	562	0.7771	273	1002	0.3875
sw00529	3800	3176	1.0784	5752	4603	1.1295	1234	3305	0.4478	229	4284	0.0821		gi|28396158|gb|AAO39756.1| putative antennal carrier protein TOL-2 [Anopheles gambiae]
sw00539	1765	1221	1.3336	2368	1474	1.5435	1634	1446	1.2782	2616	396	7.6591		gi|24475545|dbj|BAC22695.1| xylosylprotein beta4-galactosyltransferase [Drosophila melanogaster]
sw00543	1019	953	1.0068	1339	1163	1.1595	1378	1070	1.4703	2627	548	5.4507		gi|85857650|gb|ABC86360.1| IP12451p [Drosophila melanogaster]
sw00553	4120	3571	1.0691	4697	4005	1.114	4596	3372	1.3934	571	2923	0.2575
sw00556	472	470	1.0575	864	616	1.4066	1208	506	2.6038	163	434	0.6243		gi|25012568|gb|AAN71384.1| RE37929p [Drosophila melanogaster]
sw00571	2664	1826	1.2412	3076	2282	1.3101	1528	1848	0.9257	252	2459	0.1081		gi|6456874|gb|AAF09264.1| cytochrome P450 [Orconectes limosus]
sw00579	14218	8588	1.3404	20211	18629	1.0663	14103	5998	2.0589	35422	7802	2.3484		gi|55238054|gb|EAL39767.1| ENSANGP00000025956 [Anopheles gambiae str. PEST] ENSANGP00000025956 [Anopheles gambiae str. PEST]
sw00591	2500	2547	1.0515	4269	4611	1.0872	2717	4507	0.6188	11125	2078	3.6761		gi|55239333|gb|EAA44260.2| ENSANGP00000025275 [Anopheles gambiae str. PEST] ENSANGP00000025275 [Anopheles gambiae str. PEST]
sw00593	19914	15769	1.067	29310	31675	0.9836	22096	28608	0.9125	1020	30328	0.033		gi|2443450|gb|AAC47827.1| olfactory protein [Cactoblastis cactorum]
sw00595	11459	14327	0.7173	8796	8163	1.1308	2664	3795	0.7274	966	21957	0.0557		gi|2961127|gb|AAC05666.1| putative pupal-specific cuticular protein CP2b [Anopheles gambiae]
sw00605	527	627	1.1184	534	639	1.1757	784	552	1.4673	1233	373	4.1437		gi|55245480|gb|EAA04612.2| ENSANGP00000019087 [Anopheles gambiae str. PEST] ENSANGP00000019087 [Anopheles gambiae str. PEST]
sw00611	2355	1903	1.192	3216	3208	1.0677	2641	2940	0.9425	9130	1918	4.3876		gi|66549073|ref|XP_624173.1| PREDICTED: similar to 6-phosphogluconolactonase [Apis mellifera]
sw00628	532	582	1.0195	46	245		-30	199		2443	174	20.2043
sw00630	5512	3963	1.2861	6291	2100	3.2415	3324	973	4.7951	241	3206	0.0824
sw00643	3014	2151	1.2208	3124	2104	1.476	3788	1439	2.3945	13691	2189	5.9698		gi|8918492|dbj|BAA97657.1| ecdysteroid-inducible angiotensin-converting enzyme-related gene product [Bombyx mori]
sw00648	704	659	1.0948	687	622	1.1336	452	548	0.9429	1021	559	2.5068		gi|73988919|ref|XP_542530.2| PREDICTED: similar to neuron navigator 2 isoform 2 [Canis familiaris]
sw00652	2040	1624	1.1283	3662	2858	1.1094	2827	2208	1.194	2912	1467	2.1431		gi|1209648|gb|AAC47002.1| protein tyrosine phosphatase DLAR protein tyrosine phosphatase (DLAR) precursor
sw00653	8141	5614	1.1979	10095	8989	1.0635	8093	3577	2.279	7506	5544	1.1843		gi|1209648|gb|AAC47002.1| protein tyrosine phosphatase DLAR protein tyrosine phosphatase (DLAR) precursor
sw00656	2672	2298	1.0162	3433	2575	1.1546	2286	2619	0.8246	567	1963	0.3036
sw00681	1339	1846	0.7847	2147	2121	1.0611	1392	1545	0.9381	8161	1511	6.299		gi|37182587|gb|AAQ89095.1| CGLQ1891 [Homo sapiens] synleurin [Homo sapiens] synleurin - human
sw00689	1091	2079	0.6115	2069	3516	0.5942	2363	2766	0.9154	12203	1562	9.3569		gi|85070116|gb|ABC69733.1| vermilion [Mayetiola destructor]
sw00728	4861	5650	0.6737	4634	4102	0.97	3029	3347	0.974	203	4840	0.0371		gi|27261765|gb|AAN86085.1| lysozyme [Penaeus semisulcatus]
sw00729	483	663	0.8937	648	660	1.0814	11203	619	11.9274	182	256
sw00733	3956	3875	0.9213	7372	6631	1.0033	3453	3332	1.0716	2337	5341	0.4727		gi|66516922|ref|XP_393670.2| PREDICTED: similar to putative carboxylesterase [Apis mellifera]
sw00734	489	839	0.7029	502	705	0.8106	680	704	1.0416	3038	855	3.613		gi|87248427|gb|ABD36266.1| triacylglycerol lipase [Bombyx mori]
sw00738	1701	1943	0.9169	1812	2998	0.5945	947	3252	0.3385	78	1688	0.0588		gi|47605408|sp|Q7M4E8|CUD6_SCHGR Endocuticle structural protein SgAbd-6
sw00745	2735	2763	0.9496	4286	2455	1.7478	774	1163	0.7626	142	2427	0.0939		gi|77684272|ref|ZP_00799706.1| Histidine kinase, HAMP region:Cache:Bacterial chemotaxis sensory transducer [Alkaliphilus metalliredigenes QYMF] Histidine kinase, HAMP region:Cache:Bacterial chemotaxis sensory transducer [Alkaliphilus metalliredigenes QYMF]
sw00748	2297	1328	1.4931	2667	1700	1.4249	1906	1219	1.6117	8979	2571	2.9391		gi|66508985|ref|XP_624902.1| PREDICTED: similar to ENSANGP00000010432 [Apis mellifera]
sw00753	2316	2600	0.8129	2231	3121	0.7267	844	1626	0.6243	309	3604	0.139		gi|54645262|gb|EAL34002.1| GA16377-PA [Drosophila pseudoobscura]
sw00778	525	810	0.8386	983	1339	0.9894	389	454	0.9417	971	508	2.1889		gi|50760311|ref|XP_417966.1| PREDICTED: similar to prostein protein [Gallus gallus]
sw00791	349	671	0.7134	451	770	0.7996	1191	1411	0.9134	844	452	2.1848		gi|68401616|ref|XP_685003.1| PREDICTED: similar to 5-nucleotidase, cytosolic II isoform 1 [Danio rerio]
sw00795	7045	18116	0.3566	6690	12855	0.5476	8130	6868	1.2134	7146	8773	0.793		gi|9714|emb|CAA45706.1| H(+)-transporting ATPase [Manduca sexta] Vacuolar ATP synthase subunit B (V-ATPase B subunit) (Vacuolar proton pump B subunit)
sw00796	2992	2750	1.1216	2445	2735	0.9765	2960	4127	0.7157	213	2700	0.0931
sw00810	1496	1909	0.8608	1545	1221	1.3919	1092	1292	0.9387	442	1281	0.4336		gi|23393882|gb|AAN31397.1| cell adhesion molecule RST [Drosophila virilis] cell adhesion molecule RST [Drosophila virilis]
sw00812	388	589	0.7732	451	639	0.8677	97	281		72	1215	0.0552		gi|55245299|gb|EAA04515.2| ENSANGP00000010837 [Anopheles gambiae str. PEST] ENSANGP00000010837 [Anopheles gambiae str. PEST]
sw00813	6437	4925	1.2509	8181	7558	1.1753	9931	8786	1.1158	13594	3984	2.1965		gi|7548744|gb|AAB28237.2| diazepam binding inhibitor; DBI [Manduca sexta] Acyl-CoA-binding protein homolog (ACBP) (Diazepam-binding inhibitor homolog) (DBI) diazepam binding inhibitor-like peptide
sw00832	329	378		1171	497	2.2807	3629	547	5.8239	126	194			gi|27924034|tpg|DAA00396.1| TPA: TPA_exp: Dyggve-Melchior-Clausen syndrome protein [Homo sapiens] Dymeclin (Dyggve-Melchior-Clausen syndrome protein)
sw00843	1151	1177	0.8904	961	1095	0.9423	780	1014	0.8971	354	1203	0.3327		gi|2352298|gb|AAB84380.1| high-affinity Na+-dependent glutamate transporter [Trichoplusia ni]
sw00854	4942	3008	1.5495	4994	4316	1.1595	4915	3561	1.73	938	5016	0.1826		gi|25992174|gb|AAN77090.1| masquerade-like serine proteinase homolog [Bombyx mori]
sw00863	1681	1222	1.3288	1416	1271	1.114	1306	597	2.5663	1032	1013	1.2455		gi|68356762|ref|XP_685406.1| PREDICTED: similar to ligase I [Danio rerio]
sw00871	1772	1797	0.9769	2631	2063	1.3321	1489	2253	0.7482	297	1338	0.3148		gi|27884034|gb|AAO23957.1| HZGJ [Homo sapiens]
sw00885	961	1217	0.9335	1368	1447	1.0745	283	1212	0.2523	73	1174	0.0894
sw00887	8491	5370	1.2546	12447	10341	1.1302	8319	8082	1.2275	20240	2704	5.4185		gi|33285891|gb|AAQ01563.1| promoting protein [Bombyx mori]
sw00897	16785	16423	0.8514	22245	13913	1.4994	20153	13281	1.7771	3292	17106	0.1488
sw00900	687	1000	0.708	388	432	1.0403	181	427	0.6531	57	996	0.0684		gi|66504174|ref|XP_624735.1| PREDICTED: similar to CG32694-PA, isoform A [Apis mellifera]
sw00907	1169	1168	0.9789	1014	902	1.219	1069	1107	1.1934	1230	646	2.2389		gi|73954897|ref|XP_546411.2| PREDICTED: similar to Signal recognition particle receptor alpha subunit (SR-alpha) (Docking protein alpha) (DP-alpha) [Canis familiaris]
sw00920	789	2225	0.3096	860	3407	0.219	192	359		192	640	0.4202		gi|16604137|gb|AAL27237.1| Prion-like-(q/n-rich)-domain-bearing protein protein 25 [Caenorhabditis elegans] Prion-like-(Q/N-rich)-domain-bearing protein family member (pqn-25) [Caenorhabditis elegans] Glutamine/asparagine-rich protein pqn-25
sw00947	56085	36075	0.9447	56075	46482	0.9902	16015	57019	0.2952	2668	57684	0.0318		gi|3913391|sp|O02387|CU17_BOMMO Larval cuticle protein LCP-17 precursor LCP17 [Bombyx mori]
sw00948	56077	34799	0.9035	84709	44462	1.2465	46369	45681	1.0903	5776	57671	0.0697		gi|3913391|sp|O02387|CU17_BOMMO Larval cuticle protein LCP-17 precursor LCP17 [Bombyx mori]
sw00949	806	847	0.966	693	833	0.9246	382	403	1.2264	849	449	2.2121		gi|58569859|gb|AAW79050.1| GekBS204P [Gekko japonicus]
sw00954	743	881	0.9715	1275	1387	0.9197	396	1229	0.3561	142	536	0.4524		gi|47117013|sp|Q7M4I6|PA2_MEGPE Phospholipase A2 (Phosphatidylcholine 2-acylhydrolase)
sw00993	3775	3069	1.2463	5861	5102	1.2651	7607	7435	0.9967	16873	2381	4.4368		gi|28948808|pdb|1NBH|D Chain D, Structure Of Glycine N-Methyltransferase Complexed With S- Adenosylmethionine And Acetate, Gnmt:sam:ace Chain C, Structure Of Glycine N-Methyltransferase Complexed With S- Adenosylmethionine And Acetate, Gnmt:sam:ace Chain B, Structure Of Glycine N-Methyltransferase Complexed With S- Adenosylmethionine And Acetate, Gnmt:sam:ace Chain A, Structure Of Glycine N-Methy…
sw01032	8849	6654	1.031	13205	10570	1.0277	9473	8030	1.1448	1132	9560	0.0861		gi|72083296|gb|AAZ66313.1| RE64894p [Drosophila melanogaster]
sw01062	465	578	0.9587	506	522	1.1986	403	304	1.7345	1492	275	7.2218		gi|84095074|dbj|BAE66652.1| phenylalanine hydroxylase [Papilio xuthus]
sw01068	486	594	0.9027	656	544	1.3248	615	563	1.3048	1197	691	2.0123		gi|20126654|dbj|BAB88907.1| seven-up beta [Bombyx mori]
sw01082	7285	5829	1.2173	10733	6530	1.6485	12270	5408	2.167	25314	3047	7.4402		gi|7106224|gb|AAF36090.1| flagelliform silk protein [Nephila clavipes]
sw01084	6381	4784	1.0718	12310	6313	1.763	3214	4411	0.8638	342	3535	0.1114
sw01095	2339	1908	1.119	1773	2201	0.7727	792	1847	0.487	214	2400	0.0852
sw01096	13743	13923	0.7493	14193	19940	0.5442	2280	15748	0.1864	440	18845	0.0133		gi|55242208|gb|EAL40896.1| ENSANGP00000027230 [Anopheles gambiae str. PEST] ENSANGP00000012173 [Anopheles gambiae str. PEST] ENSANGP00000027230 [Anopheles gambiae str. PEST] ENSANGP00000012173 [Anopheles gambiae str. PEST]
sw01099	6987	4140	1.4269	5689	3258	1.698	4435	2428	2.3516	783	5357	0.1206		gi|29134779|dbj|BAC66140.1| projectin [Procambarus clarkii]
sw01103	1195	1168	0.999	944	827	1.2502	53	287		143	1119	0.1508		gi|66507056|ref|XP_396564.2| PREDICTED: similar to CG6131-PA [Apis mellifera]
sw01118	11885	9157	1.1555	12629	5987	2.197	9619	4665	2.1325	1108	10695	0.1146		gi|72065732|ref|XP_798089.1| PREDICTED: similar to Myosin light chain kinase, smooth muscle and non-muscle isozymes (MLCK) [Strongylocentrotus purpuratus]
sw01139	5135	4453	0.8981	3241	2196	1.4446	3206	2085	1.699	391	3917	0.0986		gi|87248125|gb|ABD36115.1| EN protein binding/engrailed nuclear homeoprotein-regulated protein [Bombyx mori]
sw01148	2265	1941	0.9761	1717	1271	1.1772	657	954	0.7558	156	2138	0.1036		gi|55245484|gb|EAA04134.2| ENSANGP00000019058 [Anopheles gambiae str. PEST] ENSANGP00000019058 [Anopheles gambiae str. PEST]
sw01149	3052	2039	1.3374	3614	3001	1.1714	2663	2352	1.194	454	1815	0.3595		gi|61889092|ref|NP_077325.2| adenylate kinase 1 [Rattus norvegicus] Adenylate kinase 1 [Rattus norvegicus]
sw01150	3900	4744	0.8156	4446	4482	0.9238	7108	5594	1.3738	388	3884	0.1276		gi|28317019|gb|AAO39529.1| RE22259p [Drosophila melanogaster]
sw01185	16556	14447	0.9592	18985	17057	1.1625	18823	16370	1.1531	2301	21228	0.0919
sw01193	321	440	1.0202	508	512	1.366	804	525	1.6109	1016	331	3.312
sw01201	43406	36961	0.9303	67300	54370	1.0411	30784	57044	0.5469	15735	39380	0.3327		gi|3913391|sp|O02387|CU17_BOMMO Larval cuticle protein LCP-17 precursor LCP17 [Bombyx mori]
sw01216	2752	2936	0.8622	2431	2257	1.0223	2918	2385	1.1228	241	2062	0.1152		gi|203921|gb|AAB59684.1| D-beta-hydroxybutyrate dehydrogenase
sw01251	673	802	0.8987	585	550	1.2687	1366	824	1.9974	2872	510	6.0534		gi|60678129|gb|AAX33571.1| HL05615p [Drosophila melanogaster]
sw01257	290	815	0.4643	512	608	1.0177	322	212		201	238
sw01258	1456	1531	0.9971	1540	1407	1.1865	1109	872	1.4967	5271	1214	4.5958		gi|157798|gb|AAA28661.1| laminin A chain
sw01260	910	2034	0.4435	1342	1339	0.9843	738	838	0.9683	3797	1137	3.2404		gi|55244419|gb|EAL41476.1| ENSANGP00000026359 [Anopheles gambiae str. PEST] ENSANGP00000026359 [Anopheles gambiae str. PEST]
sw01265	20040	11218	1.5781	23706	21008	1.0818	15878	17151	1.0548	8723	16856	0.3804		gi|56378321|dbj|BAD74197.1| heat shock protein hsp21.4 [Bombyx mori]
sw01281	6189	3955	1.4219	9786	4560	2.1632	7665	2634	3.5001	9584	2828	2.1269		gi|550486|gb|AAB64306.1| pyruvate carboxylase [Aedes aegypti]
sw01285	14259	16076	0.7493	12776	21326	0.5348	2391	16327	0.1545	535	20791	0.031		No hits found
sw01323	3194	1983	1.3494	2952	2704	1.0439	2338	994	2.3429	1653	1538	1.1774
sw01325	815	951	0.905	586	661	1.0369	159	196		48	1035	0.0901		gi|28261395|gb|AAO32819.1| putative cuticle protein [Manduca sexta] putative cuticle protein [Manduca sexta]
sw01333	15092	13978	0.8014	18463	14240	1.1547	13801	17935	0.8088	1805	15773	0.1477		gi|87248131|gb|ABD36118.1| fumarylacetoacetate hydrolase [Bombyx mori]
sw01358	1353	1070	1.4876	1242	1641	1.0004	758	723	1.0609	650	2377	0.3321		gi|1346296|sp|P98092|HMCT_BOMMO Hemocytin precursor (Humoral lectin) humoral lectin prepropeptide [Bombyx mori] hemocytin
sw01367	9906	6698	1.3818	7518	7240	1.1027	15299	5515	2.8678	1647	8404	0.2275		gi|66539393|ref|XP_393278.2| PREDICTED: similar to ENSANGP00000010211 [Apis mellifera]
sw01389	388	567	0.8941	600	757	1.0466	1100	1165	0.9082	2235	414	4.9665		gi|72011986|ref|XP_784622.1| PREDICTED: similar to Methylcrotonoyl-CoA carboxylase alpha chain, mitochondrial precursor (3-Methylcrotonyl-CoA carboxylase 1) (MCCase alpha subunit) (3-methylcrotonyl-CoA:carbon dioxide ligase alpha subunit) (3-Methylcrotonyl-CoA carboxylase biotin-containi... [Strongylocentrotus purpuratus]
sw01391	993	1195	0.8855	718	691	1.2974	355	430	1.0723	68	1016	0.0887		gi|24580513|ref|NP_722590.1| CG31973-PB, isoform B [Drosophila melanogaster] CG31973-PB, isoform B [Drosophila melanogaster]
sw01402	9757	6637	1.2674	14623	12710	1.0418	20998	9310	2.9307	2685	5523	0.4457		gi|15886861|emb|CAC85911.1| arginine kinase [Plodia interpunctella] Arginine kinase (AK) (Allergen Plo i 1)
sw01405	2396	2448	0.9953	2228	1654	1.4554	2458	1164	2.0846	2497	2065	1.179		gi|76654987|ref|XP_879917.1| PREDICTED: similar to cyclin M2 isoform 2 isoform 9 [Bos taurus]
sw01413	87	188		99	371		54	209		1653	159	14.0011		gi|1103383|emb|CAA63802.1| alpha7 nicotinic acetylcholine receptor subunit [Bos taurus] cholinergic receptor, nicotinic, alpha 7 [Bos taurus] Neuronal acetylcholine receptor protein, alpha-7 subunit precursor
sw01418	2477	3183	0.7655	2863	1953	1.4171	974	1449	0.7287	198	1265	0.2137		gi|72159142|ref|XP_792217.1| PREDICTED: similar to ganglioside-induced differentiation-associated-protein 2 (predicted) [Strongylocentrotus purpuratus]
sw01422	1549	3227	0.5077	1167	2515	0.5213	641	1715	0.4112	1433	1251	1.3126
sw01429	752	728	1.121	1235	1280	1.0707	305	821	0.3663	46	649	0.145		gi|6164595|gb|AAF04457.1| lacunin [Manduca sexta]
sw01437	55866	28988	1.2785	79219	17316	4.5947	57097	12469	6.2288	2893	57685	0.0402		gi|68989041|dbj|BAE06190.1| glycine rich protein [Bombyx mori]
sw01438	1290	1077	1.2761	1462	811	1.968	1256	394	4.4792	139	1147	0.1513		gi|54642703|gb|EAL31448.1| GA17082-PA [Drosophila pseudoobscura]
sw01465	1766	2424	0.8218	2138	2060	1.169	1203	2278	0.5519	620	2027	0.3441
sw01471	4257	3452	1.0405	5550	4807	1.1266	3731	4844	0.9077	11370	2497	3.5241		gi|57164179|ref|NP_001009467.1| 6-phosphogluconate dehydrogenase (decarboxylating) [Ovis aries] 6-phosphogluconate dehydrogenase, decarboxylating 6-phosphogluconate dehydrogenase (decarboxylating) [Ovis aries]
sw01486	611	1298	0.5407	731	1371	0.6077	273	1367	0.3033	10	1141	0.0321		gi|66499360|ref|XP_396507.2| PREDICTED: similar to CG11550-PA [Apis mellifera]
sw01504	927	910	0.9854	500	816	0.6173	380	764	0.601	3838	1944	2.5828		gi|68396543|ref|XP_682831.1| PREDICTED: similar to trimethyllysine hydroxylase, epsilon [Danio rerio]
sw01523	300	316		321	397		1058	252	5.0295	74	164			gi|55235970|gb|EAA14478.2| ENSANGP00000014394 [Anopheles gambiae str. PEST] ENSANGP00000014394 [Anopheles gambiae str. PEST]
sw01551	4626	3306	1.3592	5253	4489	1.3535	5333	3932	1.2802	221	2851	0.122		gi|6448469|dbj|BAA86911.1| homologue of Sarcophaga 26,29kDa proteinase [Periplaneta americana]
sw01567	8893	7133	1.1702	8986	10712	0.8729	3627	9221	0.3987	521	10607	0.0661
sw01574	8129	4989	1.5136	11165	7834	1.2561	12118	6836	1.7268	27363	2209	9.6345		gi|1362608|pir||A53909 gelsolin, secreted form precursor - fruit fly (Drosophila melanogaster) The biology of this fly protein has not yet been explored. Its identification as a secretory gelsolin is based on sequence comparison to the vertebrate gelsolins.; putative
sw01583	4274	4676	0.806	6475	6884	0.9692	8629	6761	1.2882	14607	3233	3.885		gi|87248415|gb|ABD36260.1| tetraspanin D107 [Bombyx mori]
sw01585	372	566	0.8662	352	1086	0.441	208	659	0.3674	81	293			No hits found
sw01587	7178	4319	1.3694	9232	5961	1.4239	5059	4291	1.1826	11813	5699	2.0293		gi|17862342|gb|AAL39648.1| LD22648p [Drosophila melanogaster]
sw01589	4500	3843	1.1275	4336	3495	1.2686	4074	3970	0.9757	361	3652	0.139		gi|14041184|emb|CAC38758.1| mucus-like protein [Geodia cydonium]
sw01592	1226	518	2.5165	295	340		294	236		99	222
sw01595	411	440	1.0756	442	572	0.9773	507	505	1.1977	1446	288	5.6999
sw01600	13035	6771	1.5052	19703	10355	1.4056	12007	15236	0.7242	706	9542	0.0545
sw01617	743	862	0.9293	968	1073	1.0305	666	800	0.8596	1718	534	3.4592		gi|1663690|dbj|BAA08704.1| DNA supercoiling factor [Bombyx mori]
sw01636	2844	1816	1.4274	2999	2884	0.9534	2618	1509	2.0442	1557	1737	0.9295		gi|1125764|gb|AAA83588.1| Uncoordinated protein 78, isoform a [Caenorhabditis elegans] UNCoordinated family member (unc-78) [Caenorhabditis elegans] UNC-78 [Caenorhabditis elegans] Actin-interacting protein 1 (AIP1) (Uncoordinated protein 78) Chain A, Crystal Structure Of The Actin Interacting Protein From Caenorhabditis Elegans Chain A, Two Seven-Bladed Beta-Propeller Domains Revealed By The Str…
sw01645	2569	3275	0.7915	4345	3362	1.2749	7925	2488	3.4633	613	2106	0.3111		gi|55243548|gb|EAA06469.2| ENSANGP00000012390 [Anopheles gambiae str. PEST] ENSANGP00000012390 [Anopheles gambiae str. PEST]
sw01649	1800	2133	0.9547	2886	3253	0.9469	4166	4273	1.0667	8822	1342	8.1022		gi|66517091|ref|XP_397364.2| PREDICTED: similar to ENSANGP00000027134 [Apis mellifera]
sw01650	1244	1665	0.8037	968	1179	0.9411	1023	657	1.7125	455	1912	0.3001		gi|74136401|ref|NP_001028098.1| ATP2B4 protein [Macaca mulatta] ATP2B4 [Macaca mulatta]
sw01653	1446	1631	1.0229	1838	1940	1.0587	1973	1586	1.3412	2744	1386	2.403		gi|45383926|ref|NP_990540.1| solute carrier family 2 (facilitated glucose transporter), member 1 [Gallus gallus] Solute carrier family 2, facilitated glucose transporter member 1 (Glucose transporter type 1) (GT1) glucose transporter protein
sw01658	256	325		538	500	1.3511	1218	204	5.7497	147	247			No hits found
sw01668	2303	2659	0.7836	2519	1412	1.7745	3681	885	4.0313	3841	1145	5.195
sw01672	2964	2420	1.0805	2842	2517	1.0291	4332	3255	1.4179	483	3187	0.14
sw01712	784	649	1.1879	1752	1078	1.5351	2172	471	5.0262	4051	670	6.8642		gi|71060087|emb|CAJ18587.1| Inhba [Mus musculus]
sw01720	497	511	0.9613	636	533	1.1477	1177	805	1.6023	1725	468	4.4668		gi|87248539|gb|ABD36322.1| Mo-molybdopterin cofactor sulfurase [Bombyx mori]
sw01725	755	814	0.9473	928	1082	0.9262	785	1015	0.9096	2293	656	3.3698		gi|25246706|gb|AAN72834.1| allantoinase [Ctenocephalides felis]
sw01726	1204	1606	0.8242	1056	872	1.2383	1166	991	1.2502	22	897	0.0567		gi|54637592|gb|EAL26994.1| GA18806-PA [Drosophila pseudoobscura]
sw01727	877	821	0.993	1042	921	1.146	352	495	0.8817	941	402	3.0869
sw01729	287	444	0.9395	493	658	1.1072	605	560	1.2571	1121	238	6.3247
sw01790	374	488	0.9876	270	277		1141	281	6.413	539	217	3.5754		gi|76559858|dbj|BAE45332.1| ecdysone 20-hydroxylase [Bombyx mori]
sw01791	531	585	0.9906	473	656	0.8965	1444	1113	1.2783	2006	448	4.8843		gi|346619|pir||JC1318 triacylglycerol lipase (EC 3.1.1.3) precursor, pancreatic - rabbit
sw01800	362	524	0.7934	591	697	0.8942	238	424	0.7037	1198	289	6.5495		gi|57747|emb|CAA29656.1| serine pyruvate aminotransferase precursor (AA -22 to 392) [Rattus rattus] serine-pyruvate transaminase (EC 2.6.1.51) precursor, mitochondrial - rat Serine--pyruvate aminotransferase, mitochondrial precursor (SPT) (Alanine--glyoxylate aminotransferase) (AGT)
sw01811	7101	4143	1.415	10958	6737	1.2932	8058	5391	1.8012	18839	1186	16.6192
sw01836	7233	6894	0.8672	10867	8977	1.0144	9598	7343	1.4517	2839	7127	0.3702		gi|76632784|ref|XP_877782.1| PREDICTED: similar to isocitrate dehydrogenase 3 (NAD+) beta isoform 7 [Bos taurus] PREDICTED: similar to isocitrate dehydrogenase 3 (NAD+) beta isoform 2 [Bos taurus] NAD(+)-isocitrate dehydrogenase subunit 1 IDH1-B precursor [Bos taurus] Isocitrate dehydrogenase [NAD] subunit beta, mitochondrial precursor (Isocitric dehydrogenase) (NAD(+)-specific ICDH) (NAD(+)-isoc…
sw01851	1779	1589	1.0342	2656	2977	0.8927	2047	1098	2.4895	8202	1653	4.0487		gi|83595225|gb|ABC25066.1| C-type lysozyme [Glossina morsitans morsitans]
sw01872	1858	1374	1.2515	2977	1713	1.694	3026	1277	2.4066	5680	925	10.5647		gi|6448469|dbj|BAA86911.1| homologue of Sarcophaga 26,29kDa proteinase [Periplaneta americana]
sw01883	2579	2714	0.7893	3106	3188	0.9282	2418	3525	0.776	5069	1956	2.6223		gi|87248099|gb|ABD36102.1| Der1-like domain family member 1 [Bombyx mori]
sw01907	1637	2117	0.6832	1417	1118	1.2747	598	1209	0.5704	145	948	0.1932
sw01916	2172	2222	0.7976	2616	2018	1.1092	1723	1602	1.1509	440	1412	0.3987		gi|55241300|gb|EAA08510.2| ENSANGP00000011712 [Anopheles gambiae str. PEST] ENSANGP00000011712 [Anopheles gambiae str. PEST]
sw01945	321	484	0.9476	181	445	0.7384	92	222		204	900	0.3444		gi|55245784|gb|EAA04520.2| ENSANGP00000021425 [Anopheles gambiae str. PEST] ENSANGP00000021425 [Anopheles gambiae str. PEST]
sw01949	981	1218	0.9557	926	1198	0.986	1571	1105	1.4169	1960	514	4.32		gi|68440549|ref|XP_708445.1| PREDICTED: similar to prolyl 4-hydroxylase, alpha I subunit isoform 1 precursor isoform 2 [Danio rerio]
sw01958	1095	1313	0.9416	1187	1685	0.8345	1466	1945	0.7961	4196	1033	3.9705		gi|25010055|gb|AAN71193.1| GH24658p [Drosophila melanogaster]
sw01970	296	1141	0.3187	264	1008	0.2929	606	754	0.8806	42	519	0.1724
sw01978	20392	15400	1.029	25711	24633	0.8963	7736	20795	0.3285	764	22949	0.0292		gi|3913392|sp|O02388|CU22_BOMMO Larval cuticle protein LCP-22 precursor LCP22 [Bombyx mori]
sw01999	1101	928	1.1391	1374	1625	0.8766	787	1634	0.5869	47	1118	0.0606		gi|6560645|gb|AAF16700.1| juvenile hormone binding protein precursor-like protein [Manduca sexta]
sw02000	2117	376	5.2966	24917	1523	10.9614	57087	6880	7.8501	104	208			gi|77411051|ref|ZP_00787405.1| cell wall surface anchor family protein [Streptococcus agalactiae CJB111] cell wall surface anchor family protein [Streptococcus agalactiae CJB111]
sw02005	1325	1384	0.9667	1295	1431	0.9886	1207	1247	0.9622	224	1409	0.1932		gi|457927|gb|AAA81883.1| calcium channel alpha-1 subunit
sw02015	755	769	1.0166	612	728	0.9539	335	731	0.5151	67	969	0.1112		gi|86450719|gb|ABC96695.1| yellow2 [Bombyx mori]
sw02018	550	856	0.736	631	810	0.8936	925	514	2.1783	306	337			gi|6560645|gb|AAF16700.1| juvenile hormone binding protein precursor-like protein [Manduca sexta]
sw02022	1155	1231	1.0091	1588	1532	1.1077	514	887	0.7046	206	953	0.3463		gi|11066123|gb|AAG28471.1| Misexpression suppressor of ras 6 [Drosophila melanogaster]
sw02046	365	676	0.6521	328	925	0.4257	120	443	0.4544	188	417	0.7868		gi|62859495|ref|NP_001017001.1| NMDA receptor regulated 1-like [Xenopus tropicalis]
sw02073	2096	1953	1.0556	1962	2068	0.9519	1889	1159	1.5482	2853	1355	2.1218		gi|55614029|ref|XP_515921.1| PREDICTED: similar to G protein-coupled receptor 155 [Pan troglodytes]
sw02089	653	749	0.948	365	528	0.8416	269	355		1158	541	2.4803
sw02108	6592	5382	0.8806	7361	5616	1.0532	5400	4729	1.2287	2527	6607	0.3338		gi|10304393|gb|AAG16235.1| ornithine decarboxylase antizyme [Bombyx mori]
sw02115	461	540	1.1886	464	607	1.2298	1217	593	2.005	1207	493	2.8962		gi|19923466|ref|NP_057417.2| splicing coactivator subunit SRm300 [Homo sapiens] RNA binding protein [Homo sapiens]
sw02121	2321	1832	1.3311	2352	2570	1.0737	2740	1210	2.371	1724	1906	1.0578
sw02143	25	116		277	187		1483	274	6.3915	505	109	6.6214		gi|217280|dbj|BAA02093.1| hemolymph protein [Bombyx mori]
sw02154	413	694	0.7993	759	972	0.9776	862	832	1.2137	3369	482	7.1153		gi|49612944|emb|CAG76395.1| putative gamma-glutamyltranspeptidase [Erwinia carotovora subsp. atroseptica SCRI1043] putative gamma-glutamyltranspeptidase [Erwinia carotovora subsp. atroseptica SCRI1043]
sw02176	45369	26532	1.0924	69258	29855	1.4588	51765	27171	1.6967	4044	49631	0.0467		gi|90567700|emb|CAI30053.1| muscular protein 20 [Hydroporus erythrocephalus]
sw02205	11603	10601	0.8611	15515	16944	0.8556	10594	15673	0.6645	2609	13443	0.1679		gi|78172883|gb|ABB29466.1| glutathione S-transferase [Corcyra cephalonica]
sw02212	3104	3667	0.7549	4280	3064	1.2621	1816	2457	0.7301	887	3033	0.3117		gi|71367849|ref|ZP_00658364.1| similar to Methylase involved in ubiquinone/menaquinone biosynthesis [Nocardioides sp. JS614] similar to Methylase involved in ubiquinone/menaquinone biosynthesis [Nocardioides sp. JS614]
sw02232	13759	9480	1.0566	20660	14055	1.2621	7207	11563	0.7764	514	13036	0.0362		gi|47605413|sp|Q7M4F3|CUD2_SCHGR Endocuticle structural glycoprotein SgAbd-2
sw02258	3023	2638	1.1777	3834	2040	1.9792	1899	1060	1.7471	286	2215	0.1747		gi|25014093|ref|NP_689492.2| zinc finger protein 585B [Homo sapiens] zinc finger protein 41-like protein [Homo sapiens]
sw02304	980	757	1.2294	825	742	1.0334	1057	572	2.0686	1275	729	2.0776
sw02309	3910	2927	1.3298	6049	3671	1.7159	9498	4519	2.0762	10005	2401	4.2936		gi|68418478|ref|XP_700202.1| PREDICTED: similar to nidogen 1; entactin [Danio rerio]
sw02310	533	575	1.2262	543	784	1.0064	3651	841	4.4673	135	477	0.4719		gi|72179523|ref|XP_786725.1| PREDICTED: similar to HIV-1 Rev binding protein 2 homolog [Strongylocentrotus purpuratus]
sw02311	2996	3883	0.7973	3346	2998	1.3601	3224	3050	1.0332	1513	3340	0.462		gi|25012192|gb|AAN71212.1| GM16802p [Drosophila melanogaster]
sw02334	282	437	0.9513	355	533	1.0008	373	455	1.1147	2992	680	5.3254		gi|1561730|gb|AAC47288.1| Dreg-3 protein [Drosophila melanogaster]
sw02335	768	1140	0.8209	541	807	0.9003	542	780	0.7958	275	985	0.3854		No hits found
sw02345	906	1385	0.7311	825	1192	0.8732	1018	1076	0.9138	38	1573	0.0482		gi|72014091|ref|XP_786946.1| PREDICTED: similar to cytochrome P450, family 4, subfamily v, polypeptide 2 [Strongylocentrotus purpuratus]
sw02400	2035	2753	0.669	2836	1850	1.4009	1102	2497	0.4581	60	2811	0.0297
sw02402	1882	1390	1.4117	2787	1769	1.7092	930	1603	0.6699	138	1695	0.1332		gi|14250736|gb|AAH08837.1| Aldo-keto reductase family 1, member B10 [Homo sapiens] aldo-keto reductase family 1, member B10 (aldose reductase) [Homo sapiens] AKR1B10 [Homo sapiens] aldo-keto reductase family 1 member B10 [synthetic construct] aldo-keto reductase family 1 member B10 [synthetic construct] aldo-keto reductase family 1, member B10 [Homo sapiens] Aldo-keto reductase family 1 member B1…
sw02429	4054	5419	0.7669	4978	3861	1.4169	2541	2000	1.3771	1219	4846	0.2362		gi|1841419|emb|CAA31918.1| glucose dehydrogenase [Drosophila melanogaster]
sw02437	570	1012	0.6679	985	1052	1.0301	562	802	0.8076	66	849	0.1896
sw02484	2064	2039	0.8368	3198	1985	1.3471	1086	1151	1.0168	688	1715	0.4616		No hits found
sw02504	2524	3146	0.8198	4147	3811	1.2301	1910	2663	0.6612	1037	3762	0.288		gi|28566306|gb|AAO43053.1| heat shock regulated-1 [Homo sapiens]
sw02524	1400	1641	0.9348	1213	1500	0.9167	1596	1727	0.8967	466	1344	0.4076
sw02528	495	1066	0.5531	419	1083	0.4534	748	763	0.9977	228	441	0.7457		No hits found
sw02532	3481	2525	1.3556	3435	3240	1.0936	3441	1623	2.0711	2537	2684	1.0097		No hits found
sw02561	1428	1411	1.0285	1843	2115	0.9526	2133	1999	1.0648	3733	1427	2.6711		gi|67678029|gb|AAH97945.1| Alcohol dehydrogenase, iron containing, 1 [Rattus norvegicus] alcohol dehydrogenase, iron containing, 1 [Rattus norvegicus]
sw02576	2717	1656	1.4426	4097	3216	1.0969	3533	2545	1.2896	9125	1226	8.1633		gi|66500891|ref|XP_623870.1| PREDICTED: similar to ENSANGP00000021863 [Apis mellifera]
sw02581	2453	1928	1.2135	2844	2359	1.2684	1968	1160	1.8126	4785	787	5.8413
sw02618	987	924	1.2241	1429	1414	1.1422	2439	1341	1.8788	1598	825	2.4083		No hits found
sw02678	506	338	1.8063	1747	623	2.6912	2439	991	2.5609	3719	246	18.6199		No hits found
sw02697	1124	1712	0.7678	916	1185	1.0243	547	950	0.6208	184	1419	0.2014		No hits found
sw02703	7582	8572	0.7853	8120	6820	1.307	7605	6894	1.0446	4949	7718	0.4956		No hits found
sw02760	672	566	1.2387	1203	771	1.4716	2191	695	3.0123	3550	417	12.1356
sw02789	9756	7076	1.2581	12169	11293	0.9765	12181	5279	2.3644	11797	8558	1.1601
sw02870	768	732	1.2002	729	754	1.0307	707	790	0.9802	1136	668	2.1891		gi|72084058|ref|XP_790678.1| PREDICTED: similar to vacuolar protein sorting 54 isoform 1 [Strongylocentrotus purpuratus]
sw02884	940	1112	1.0124	1009	1168	1.1299	881	711	1.2583	3013	1165	2.3703
sw02887	494	521	1.3078	322	658	0.817	232	896	0.3336	21	474	0.163		gi|72014020|ref|XP_783244.1| PREDICTED: similar to cytochrome P450, family 4, subfamily v, polypeptide 2 [Strongylocentrotus purpuratus]
sw02892	20220	13607	1.2119	19488	24318	0.7894	17096	22112	0.7989	29057	8267	2.413		gi|8572569|ref|NP_059474.1| NADH dehydrogenase subunit 1 [Bombyx mori] NADH dehydrogenase 1 [Bombyx mori] NADH dehydrogenase 1 [Bombyx mori]
sw02904	921	1237	0.85	688	1007	0.8108	842	895	0.9448	1181	666	2.0484		gi|76629295|ref|XP_869961.1| PREDICTED: similar to multiple coagulation factor deficiency 2 [Bos taurus]
sw02925	2289	2848	0.8158	2073	2812	0.8651	3064	3178	0.9169	407	1752	0.2811		gi|55584202|gb|AAV52386.1| microtubule-associated protein tau [Pongo pygmaeus] Microtubule-associated protein tau
sw02934	346	826	0.523	135	843	0.192	159	351		146	312			gi|50370224|gb|AAH76913.1| MGC89088 protein [Xenopus tropicalis] MGC89088 protein [Xenopus tropicalis]
sw02946	9776	7658	1.0688	12666	6555	1.606	8083	4035	2.0257	1427	9327	0.1369		gi|22474512|dbj|BAC10617.1| KETTIN [Bombyx mori] BMKETTIN [Bombyx mori]
sw02948	7159	5271	1.0721	9515	9794	0.8225	7475	7201	1.0045	11706	4268	2.2826		gi|55641779|ref|XP_510278.1| PREDICTED: similar to chromosome 15 open reading frame 24; chromosome 15 hypothetical ATG/GTP binding protein [Pan troglodytes]
sw02976	760	925	0.8405	1176	1239	0.9151	475	737	0.6993	305	1200	0.3074		gi|20070698|gb|AAH26131.1| Solute carrier family 7 (cationic amino acid transporter, y+ system), member 5 [Mus musculus] solute carrier family 7 (cationic amino acid transporter, y+ system), member 5 [Mus musculus]
sw02977	847	1162	0.837	867	1219	0.7997	782	976	0.864	326	1588	0.2308		gi|66550796|ref|XP_395404.2| PREDICTED: similar to CG3297-PA, isoform A [Apis mellifera]
sw02992	11651	8890	1.0445	16514	13773	0.9715	12219	11634	1.1128	27828	3981	5.5795		gi|22474506|dbj|BAC10611.1| FK506-binding protein [Bombyx mori] FK506-binding protein [Bombyx mori]
sw03021	677	1290	0.6035	988	957	1.1492	868	586	1.7555	69	901	0.1838		gi|38679391|gb|AAR26517.1| antennal cytochrome P450 CYP4 [Mamestra brassicae]
sw03040	516	517	1.0673	643	559	1.203	1158	616	2.0263	52	292			gi|62655984|ref|XP_213277.3| PREDICTED: similar to novel protein [Rattus norvegicus]
sw03048	4879	3649	1.0504	5074	2283	2.0629	3727	2105	1.8878	739	5285	0.1239		gi|18700461|dbj|BAB85198.1| Titin-like protein [Bombyx mori]
sw03051	8848	5616	1.1524	8019	7761	0.9165	4718	8239	0.6525	32169	3735	6.5282		gi|73971831|ref|XP_854862.1| PREDICTED: similar to Glyoxylate reductase/hydroxypyruvate reductase [Canis familiaris]
sw03075	1095	479	2.7967	3361	1262	3.3595	280	2108	0.1689	58	2538	0.0474		gi|49532924|dbj|BAD26697.1| troponin C type IIIa-like protein [Plutella xylostella]
sw03099	874	1078	0.9786	891	1293	0.8756	1006	1365	0.8006	3031	1181	2.6526		gi|87248481|gb|ABD36293.1| cytochrome b5 [Bombyx mori]
sw03101	535	834	0.8168	283	506	0.9006	294	474	0.6919	76	826	0.1778		gi|24652852|ref|NP_725091.1| CG13188-PA, isoform A [Drosophila melanogaster] CG13188-PA, isoform A [Drosophila melanogaster]
sw03109	1442	1405	1.1442	1592	1799	1.0475	2438	1694	1.4089	6396	1213	3.953		gi|76618319|ref|XP_603752.2| PREDICTED: similar to Placental protein 11 precursor (PP11) [Bos taurus]
sw03110	693	1068	0.7924	730	1339	0.7006	707	1116	0.7099	1682	750	2.449		gi|66828395|ref|XP_647552.1| 4-aminobutyrate transaminase [Dictyostelium discoideum] 4-aminobutyrate transaminase [Dictyostelium discoideum]
sw03119	342	355		216	383		850	282	3.5029	2552	777	3.4103
sw03124	1785	149	14.084	45	160		380	119		19	177			gi|28850409|gb|AAO53177.1| similar to Dictyostelium discoideum (Slime mold). Adenylyl cyclase
sw03141	2301	3104	0.7144	3183	2772	1.1887	5095	2365	2.1807	1463	2529	0.5972		gi|66504238|ref|XP_394314.2| PREDICTED: similar to ENSANGP00000014351 [Apis mellifera]
sw03143	809	834	0.9384	964	495	2.2379	1905	345	4.9182	21	385			gi|23096118|dbj|BAC16225.1| cuticle protein [Bombyx mori]
sw03150	9654	8272	0.9828	12134	9312	1.1118	9002	8605	1.0567	25192	3020	6.3526
sw03153	3022	3482	0.7958	4664	3833	1.2434	4545	3784	1.2339	12733	3075	3.5002		gi|54289250|gb|AAV31915.1| glutamine synthetase [Aedes aegypti]
sw03160	1695	1738	0.9349	2387	2347	0.9515	1503	1957	0.7993	1011	2303	0.4419		gi|85857490|gb|ABC86281.1| RE09672p [Drosophila melanogaster]
sw03192	972	1060	0.9148	1267	1684	0.7146	529	947	0.6884	1680	677	3.3304		gi|400673|sp|P31420|OMBP_MANSE Ommochrome-binding protein precursor (OBP) (YCP) ommochrome-binding protein
sw03198	365	331		522	577	1.1194	1771	1523	1.2794	2507	236	14.2627		gi|57972112|ref|XP_564944.1| ENSANGP00000027953 [Anopheles gambiae str. PEST] ENSANGP00000027953 [Anopheles gambiae str. PEST]
sw03204	1500	1215	1.1687	1972	1704	1.0931	1250	1580	0.8872	1553	1087	2.0222		gi|73977144|ref|XP_861870.1| PREDICTED: similar to Uroporphyrinogen decarboxylase (URO-D) (UPD) isoform 4 [Canis familiaris]
sw03217	207	323		264	283		146	218		2871	254	10.9656		gi|66503826|ref|XP_392190.2| PREDICTED: similar to RH44796p [Apis mellifera]
sw03220	360	359		772	517	1.5732	721	881	0.9096	1236	310	6.9624
sw03230	2195	2450	0.9414	2235	2069	1.0985	857	967	0.9561	501	1970	0.317
sw03233	6912	7751	0.7991	8987	6289	1.3125	8347	4407	1.8812	12665	4906	2.3192
sw03237	997	938	1.0945	437	497	1.0767	49	221		69	1733	0.0714		gi|47605409|sp|Q7M4E9|CUD3_SCHGR Endocuticle structural glycoprotein SgAbd-3
sw03241	699	1154	0.6545	1421	1823	0.7911	2210	4007	0.598	3106	488	6.4195		gi|34366066|emb|CAE18120.1| glycine cleavage system protein H [Crassostrea gigas]
sw03270	982	783	1.5249	1654	1599	1.3501	2316	2921	0.8242	10408	814	10.4604		gi|67543883|ref|ZP_00421814.1| Phytanoyl-CoA dioxygenase [Burkholderia vietnamiensis G4] Phytanoyl-CoA dioxygenase [Burkholderia vietnamiensis G4]
sw03275	7578	5560	1.2197	6066	3996	1.7453	4992	2650	1.7379	1022	4913	0.2267		gi|28317277|gb|AAO39638.1| AT18914p [Drosophila melanogaster]
sw03301	2080	4137	0.4838	926	2128	0.542	278	1082	0.2373	979	9548	0.1024		gi|76791840|ref|ZP_00774344.1| General substrate transporter [Pseudoalteromonas atlantica T6c] General substrate transporter [Pseudoalteromonas atlantica T6c]
sw03328	1636	1862	0.8616	3006	2099	1.3165	5485	2984	1.6718	5969	950	6.5405		gi|87248603|gb|ABD36354.1| serine hydroxymethyltransferase [Bombyx mori]
sw03337	569	1000	0.6612	306	745	0.5628	523	680	0.7935	134	940	0.1987		gi|18693297|gb|AAL78310.1| PDZ domain containing protein NHERF-2 [Oryctolagus cuniculus] Na(+)/H(+) exchange regulatory cofactor NHE-RF2 (PDZ domain containing protein NHERF-2) (Solute carrier family 9 isoform A3 regulatory factor 2) (Sodium-hydrogen exchanger regulatory factor 2)
sw03353	635	636	1.1116	368	530	0.9269	185	368		78	920	0.1313		gi|33589346|gb|AAQ22440.1| RE64209p [Drosophila melanogaster]
sw03364	3188	5082	0.5537	3685	6986	0.4643	5266	3443	1.7593	5829	2402	2.2037		gi|13928531|dbj|BAB47155.1| Bombyrin [Bombyx mori]
sw03370	5776	3531	1.527	5116	8192	0.5782	1904	7980	0.2715	113	4937	0.0361		gi|87248601|gb|ABD36353.1| antennal binding protein [Bombyx mori]
sw03391	580	680	0.9333	328	475	0.8563	357	272		1187	433	3.2068		gi|27542790|gb|AAO16877.1| wunen-trimeric MYC tag fusion protein [synthetic construct]
sw03408	638	935	0.709	1029	943	1.1041	343	439	1.0117	302	828	0.4779
sw03416	3753	2880	1.1044	6137	3335	1.6148	2802	1973	1.4933	946	3263	0.3102		gi|7328579|gb|AAF59840.1| CHARYBDE [Drosophila melanogaster]
sw03428	4680	501	8.0038	516	728	0.6745	2659	560	5.1109	7501	2017	3.3182		gi|217201|dbj|BAA01258.1| invertase [Zymomonas mobilis]
sw03436	3083	1864	1.3792	3568	2158	1.4952	2872	1399	2.1681	6248	2004	2.8234		gi|72009784|ref|XP_784731.1| PREDICTED: similar to synoviolin 1 [Strongylocentrotus purpuratus]
sw03466	824	981	1.0293	521	977	0.7659	981	948	1.0421	176	1004	0.2704		gi|25009695|gb|AAN71023.1| AT04445p [Drosophila melanogaster]
sw03475	4589	3302	1.4087	6007	3813	1.7226	5943	2922	2.1283	710	4488	0.201		gi|82931586|ref|XP_917582.1| PREDICTED: similar to abnormal cell LINeage family member (lin-41) [Mus musculus]
sw03490	817	819	1.173	1361	1360	1.1373	2324	1612	1.5765	5842	718	7.7259		gi|87248159|gb|ABD36132.1| hydroxymethylglutaryl-CoA lyase isoform 1 [Bombyx mori]
sw03491	192	312		76	387		946	1393	0.769	1207	312	4.8617		gi|85857460|gb|ABC86266.1| RE45749p [Drosophila melanogaster]
sw03494	1807	1722	1.1129	1320	1300	1.1566	1976	1059	2.1544	1697	2460	0.7326		gi|66510594|ref|XP_624428.1| PREDICTED: similar to Zfr protein [Apis mellifera]
sw03503	826	619	1.4879	597	726	1.0533	1162	538	2.3903	886	1221	0.7395		gi|73947650|ref|XP_867118.1| PREDICTED: similar to suppressor of Ty 5 homolog isoform 2 [Canis familiaris]
sw03522	2692	1803	1.4122	7033	4080	1.5119	7264	5496	1.3382	8161	1958	3.7349		gi|24642872|ref|NP_573250.1| CG6762-PA [Drosophila melanogaster] GH18251p [Drosophila melanogaster] CG6762-PA [Drosophila melanogaster] Putative sulfiredoxin
sw03539	295	440	0.7744	524	341	1.7555	1071	588	2.124	17	437	0.1382		gi|48098777|ref|XP_392558.1| PREDICTED: similar to YTH domain containing 2 [Apis mellifera]
sw03545	1003	964	1.0846	19254	18349	0.9824	27079	36064	0.7794	49887	800	51.8238		gi|1174445|sp|P20613|SSP2_BOMMO Sex-specific storage-protein 2 precursor (SP 2) (Arylphorin) storage protein SP2
sw03546	281	473	0.7635	214	350		129	212		1428	315	7.02		gi|24648441|ref|NP_732526.1| CG5191-PD, isoform D [Drosophila melanogaster] CG5191-PA, isoform A [Drosophila melanogaster] CG5191-PD, isoform D [Drosophila melanogaster] CG5191-PA, isoform A [Drosophila melanogaster]
sw03548	13106	6632	1.5215	18134	14185	1.0623	10515	12760	0.8447	911	11791	0.0714		gi|50764028|ref|XP_422928.1| PREDICTED: similar to aldose reductase [Gallus gallus]
sw03549	2890	2654	1.013	3382	2157	1.6758	1509	1824	0.7887	470	2874	0.1738
sw03556	737	582	1.3275	1813	2481	0.688	1182	3750	0.2615	4178	320	13.5889		gi|13383195|dbj|BAB39500.1| fibroin P25 [Bombyx mandarina]
sw03563	1462	1508	0.9756	1763	1836	0.9859	1039	1304	0.9186	4367	802	5.5636		gi|3004821|gb|AAC39088.1| putative inorganic phosphate cotransporter [Drosophila ananassae] Putative inorganic phosphate cotransporter
sw03572	880	790	1.1503	601	578	1.0951	266	461	0.8392	2479	613	5.3608		gi|25012361|gb|AAN71290.1| RE08130p [Drosophila melanogaster]
sw03575	1203	1084	1.0897	1985	2062	0.9856	1364	2140	0.7646	1856	493	3.9709		gi|68076941|ref|XP_680390.1| MAEBL [Plasmodium berghei strain ANKA] MAEBL, putative [Plasmodium berghei]
sw03580	4340	4591	0.7751	5500	5944	0.8168	2441	4357	0.6876	3725	6739	0.4963		gi|87248489|gb|ABD36297.1| rRNA processing protein Ebp2 [Bombyx mori]
sw03610	7342	10546	0.6328	9130	12510	0.7091	7175	11754	0.7396	6170	12523	0.4717		gi|59858992|gb|AAX09282.1| zinc finger protein [Bombyx mori]
sw03612	15130	12650	0.85	23627	18892	0.9997	13462	10853	1.3897	26650	6623	4.38		gi|4115422|dbj|BAA36352.1| protein disulphide isomerase like protein [Antheraea pernyi]
sw03613	1377	1516	0.9505	1490	981	1.4883	561	996	0.6454	63	1881	0.0702		gi|61316393|ref|NP_001013024.1| ephrin receptor [Apis mellifera] ephrin receptor [Apis mellifera]
sw03619	2614	1577	1.4177	4710	2311	1.9693	4326	2756	1.625	5301	1863	2.7031		gi|6010021|emb|CAB57222.1| catalase [Cavia porcellus] Catalase
sw03637	378	379		543	792	0.7848	450	940	0.6138	1717	253	6.6094		gi|71557964|gb|AAZ37175.1| aldose 1-epimerase [Pseudomonas syringae pv. phaseolicola 1448A] aldose 1-epimerase [Pseudomonas syringae pv. phaseolicola 1448A]
sw03641	2031	2649	0.7081	2432	1867	1.2935	1248	1268	1.0969	37	1390	0.0698
sw03649	1844	1654	1.2051	1215	1111	1.3604	1750	872	2.183	213	1956	0.1626		gi|29134779|dbj|BAC66140.1| projectin [Procambarus clarkii]
sw03654	6148	5860	1.0365	6485	8926	0.8246	6472	7773	0.8809	16347	3246	4.0313		gi|50752156|ref|XP_422682.1| PREDICTED: similar to DnaJ homolog subfamily B member 11 precursor (ER-associated dnaJ protein 3) (ErJ3) (ER-associated Hsp40 co-chaperone) (hDj9) (PWP1-interacting protein 4) (UNQ537/PRO1080) [Gallus gallus]
sw03659	635	998	0.8327	605	872	1.0514	815	923	0.932	158	836	0.3323		gi|14423721|sp|Q9NFZ2|GBGE_CALVI Guanine nucleotide-binding protein gamma-e subunit precursor guanine nucleotide-binding protein gamma subunit [Calliphora vicina]
sw03660	2900	2882	1.044	3387	3538	1.0909	4094	4041	0.9926	849	4446	0.2045		gi|6978595|ref|NP_036651.1| calcium/calmodulin-dependent protein kinase II, delta [Rattus norvegicus] Calcium/calmodulin-dependent protein kinase type II delta chain (CaM-kinase II delta chain) (CaM kinase II delta subunit) (CaMK-II delta subunit) calmodulin-dependent protein kinase II-delta (EC 2.7.1.37)
sw03670	772	584	1.7039	400	563	1.0384	1108	514	2.8962	911	958	1.2338
sw03679	773	849	1.1316	871	1829	0.597	900	1600	0.6078	1678	910	2.0155		gi|56378319|dbj|BAD74196.1| heat shock protein hsp20.1 [Bombyx mori]
sw03684	257	275		456	482	1.2388	470	354	1.5004	1187	359	5.5669		gi|25012444|gb|AAN71328.1| RE22749p [Drosophila melanogaster]
sw03697	271	543	0.6777	226	675	0.5109	254	430	0.7238	858	329	2.9705		gi|68697266|emb|CAJ14159.1| putative esterase [Anopheles gambiae]
sw03711	6977	9906	0.5398	6358	6261	0.9731	3468	4209	0.8597	1509	5232	0.3083
sw03714	13393	12152	0.9007	20133	8851	1.8027	14153	8443	1.6849	2134	11897	0.1503		gi|28574416|ref|NP_788481.1| CG6416-PI, isoform I [Drosophila melanogaster] CG6416-PI, isoform I [Drosophila melanogaster]
sw03726	1614	1087	1.4746	2535	2423	1.04	1386	2181	0.6671	10286	1306	7.2148		gi|48139441|ref|XP_397008.1| PREDICTED: similar to Diacetyl/L-xylulose reductase [Apis mellifera]
sw03729	5591	5897	0.8089	7148	7598	0.9182	9537	6034	1.735	10306	4164	2.0874		gi|1764109|gb|AAC64661.1| pacifastin light chain precursor [Pacifastacus leniusculus]
sw03733	10861	6921	1.2592	13277	9774	1.3297	12686	5307	2.8047	12243	7480	1.3284		gi|68441657|ref|XP_698520.1| PREDICTED: similar to G protein-coupled receptor 158 [Danio rerio]
sw03742	1244	1571	0.8165	1647	1840	0.9485	952	1672	0.6344	707	2396	0.3201		gi|55235786|gb|EAA14577.2| ENSANGP00000020940 [Anopheles gambiae str. PEST] ENSANGP00000020940 [Anopheles gambiae str. PEST]
sw03754	6379	6760	0.8445	9700	9965	0.9356	6479	8132	0.9192	12649	4815	2.3858		gi|70954504|gb|AAZ15878.1| deltamethrin resistance-associated NYD-GBE [Culex pipiens pallens]
sw03770	756	664	1.3588	1592	1486	1.2059	1061	1329	0.9381	3303	830	4.7021		gi|5453746|ref|NP_006432.1| 5,10-methenyltetrahydrofolate synthetase (5-formyltetrahydrofolate cyclo-ligase) [Homo sapiens] 5,10-methenyltetrahydrofolate synthetase (5-formyltetrahydrofolate cyclo-ligase) [Homo sapiens] 5,10-methenyltetrahydrofolate synthetase 5-formyltetrahydrofolate cyclo-ligase (5,10-methenyl-tetrahydrofolate synthetase) (Methenyl-THF synthetase) (MTHFS)
sw03779	6674	7340	0.7434	6148	6991	0.7964	5271	5555	1.161	4075	9206	0.3471		gi|87248129|gb|ABD36117.1| exuperantia [Bombyx mori]
sw03784	7613	7251	0.8445	9969	6779	1.2898	3953	4461	0.9775	1858	8603	0.1811
sw03787	1677	2481	0.6127	3478	3724	0.8706	1524	1168	1.6355	830	2107	0.3716		gi|73995995|ref|XP_850541.1| PREDICTED: similar to carbonic anhydrase 15 [Canis familiaris]
sw03802	1169	1319	0.9869	1945	2023	0.972	1061	1811	0.6521	66	2039	0.0552
sw03805	1150	1574	0.7924	1693	1422	1.1831	2806	1758	1.5294	26	1371	0.0512
sw03837	20303	15228	0.9605	32846	17407	1.6124	19438	15928	1.2171	952	19328	0.0729		gi|87248377|gb|ABD36241.1| notch-like protein [Bombyx mori]
sw03872	8533	8191	0.9331	9609	10742	0.9033	9617	12863	0.7748	16750	4469	3.211		gi|87248629|gb|ABD36367.1| translocon-associated protein gamma [Bombyx mori]
sw03877	1273	1277	1.127	695	1305	0.6845	2608	878	3.1061	1223	2061	0.5855		gi|55237388|gb|EAA12205.2| ENSANGP00000018228 [Anopheles gambiae str. PEST] ENSANGP00000018228 [Anopheles gambiae str. PEST]
sw03882	527	476	1.4002	969	1188	0.9825	808	922	1.0111	6490	311	19.8893		gi|126417|sp|P09336|LP3_BOMMO Low molecular 30 kDa lipoprotein PBMHPC-19 precursor 30K lipoprotein precursor [Bombyx mori]
sw03888	11979	7435	1.3686	21978	15493	1.2569	23969	11411	1.8643	40628	1999	29.3017		gi|25090512|sp|Q25513|HGLY_MANSE Hemolymph glycoprotein precursor glycoprotein
sw03906	4114	4456	0.855	5925	5724	0.9482	4140	3893	1.0817	1969	4775	0.3848		gi|73949236|ref|XP_856020.1| PREDICTED: similar to Ubiquitin-conjugating enzyme E2 D2 (Ubiquitin-protein ligase D2) (Ubiquitin carrier protein D2) (Ubiquitin-conjugating enzyme E2-17 kDa 2) (E2(17)KB 2) isoform 6 [Canis familiaris]
sw03915	3819	2654	1.2229	7313	5178	1.291	8651	4494	1.7534	19607	1736	11.1115		gi|49899988|gb|AAH76997.1| Palmitoyl-protein thioesterase 1 (ceroid-lipofuscinosis, neuronal 1, infantile) [Xenopus tropicalis] palmitoyl-protein thioesterase 1 (ceroid-lipofuscinosis, neuronal 1, infantile) [Xenopus tropicalis] palmitoyl-protein thioesterase 1 [Xenopus tropicalis]
sw03925	9333	7875	0.9592	13823	12713	1.0393	16042	11570	1.5255	18792	6560	2.2803		No hits found
sw03927	10957	3901	2.3626	5800	6279	0.8212	6485	4846	1.5832	280	16495	0.0172		gi|87248093|gb|ABD36099.1| cuticle protein 3 [Bombyx mori]
sw03933	15569	13024	0.9109	23328	17782	1.2426	18992	17436	1.1686	1142	18495	0.0553
sw03949	17748	15167	1.0044	27327	19829	1.1775	19227	19235	0.8957	12945	21077	0.437		gi|22901742|gb|AAN10050.1| Y-box protein Ct-p50 [Chironomus tentans]
sw03951	722	447	1.9403	516	475	1.3487	928	415	2.8325	230	463	0.7869
sw03954	553	539	1.2612	691	810	1.0086	338	463	0.9487	963	537	2.4018		gi|72055852|ref|XP_798584.1| PREDICTED: similar to Protein C20orf116 homolog precursor [Strongylocentrotus purpuratus]
sw03959	1570	1352	1.0957	1654	1251	1.412	1119	1114	1.2884	272	1624	0.2221		gi|1763687|gb|AAB39774.1| expanded [Drosophila melanogaster]
sw04021	3218	2081	1.3744	3080	2467	1.2252	3331	1443	2.261	3233	1985	1.5962		gi|72068741|ref|XP_790420.1| PREDICTED: similar to proteasome 26S non-ATPase subunit 2 [Strongylocentrotus purpuratus]
sw04023	1997	1992	0.8724	2073	1747	1.16	2064	2004	1.145	131	2120	0.0682		gi|57966866|ref|XP_562320.1| ENSANGP00000027535 [Anopheles gambiae str. PEST] ENSANGP00000027535 [Anopheles gambiae str. PEST]
sw04026	95	1099	0.1348	104	599	0.2604	85	291		129	219			gi|28316954|gb|AAO39498.1| RE51525p [Drosophila melanogaster]
sw04028	6120	3740	1.2477	4010	4482	0.7633	2993	3569	0.8938	7810	2781	2.3849		gi|2970687|gb|AAC06038.1| beta-glucosidase precursor [Spodoptera frugiperda]
sw04041	1473	6176	0.2929	170	10510	0.0356	17	575	0.0662	44	2596	0.0319		gi|55243694|gb|EAA06762.2| ENSANGP00000019864 [Anopheles gambiae str. PEST] ENSANGP00000019864 [Anopheles gambiae str. PEST]
sw04052	3120	2870	1.1146	1962	2229	0.9707	3678	2185	1.6277	5521	2381	2.1947		gi|72009924|ref|XP_786491.1| PREDICTED: similar to ATPase type 13A [Strongylocentrotus purpuratus]
sw04054	1948	2773	0.7256	1957	3049	0.7244	2863	2854	1.1537	6330	2416	2.8127
sw04083	17041	10489	1.1887	20935	13539	1.3539	20730	10818	1.8413	47053	3702	11.9798		gi|76618319|ref|XP_603752.2| PREDICTED: similar to Placental protein 11 precursor (PP11) [Bos taurus]
sw04136	678	1459	0.4754	376	1149	0.3526	231	417	0.6719	149	667	0.3947		gi|25012376|gb|AAN71297.1| RE10019p [Drosophila melanogaster]
sw04137	19284	17069	0.9611	28783	18067	1.359	25756	15404	1.5782	3074	15336	0.1505		gi|66517541|ref|XP_393694.2| PREDICTED: similar to CG32171-PD, isoform D [Apis mellifera]
sw04148	621	1710	0.3524	640	1153	0.54	465	707	0.8174	186	583	0.5553		gi|55583303|dbj|BAD69569.1| aquaporin [Bombyx mori]
sw04152	2525	1871	1.237	3341	2772	1.1199	1753	2129	0.9346	692	3126	0.2465
sw04154	1036	1141	1.0168	2116	1894	1.2291	2723	2073	1.3942	7147	681	11.9504		gi|87248571|gb|ABD36338.1| phosphoribosyl pyrophosphate synthetase [Bombyx mori]
sw04166	643	669	1.1988	695	749	1.142	425	706	0.8092	153	804	0.3309
sw04192	1060	1215	0.818	1376	1651	0.7779	422	833	0.6011	1451	531	4.3957		gi|945383|gb|AAC41580.1| carboxypeptidase Vitellogenic carboxypeptidase precursor
sw04203	8383	6076	1.016	8192	5960	1.2427	7689	4917	1.6564	16263	6049	2.1263
sw04222	1222	1529	0.8759	1788	1561	1.1081	1083	1135	1.0115	239	1385	0.2475		gi|5815231|gb|AAD52607.1| unknown [Drosophila melanogaster]
sw04237	1661	2352	0.7968	1605	1822	1.0758	2178	1185	1.9252	4296	1475	3.1844		gi|27542790|gb|AAO16877.1| wunen-trimeric MYC tag fusion protein [synthetic construct]
sw04252	6750	5585	1.1337	3598	5324	0.6986	9914	9588	1.0568	255	4126	0.0692		gi|1934852|emb|CAA73031.1| putative organic cation transporter [Drosophila melanogaster]
sw04254	1195	1228	1.1095	937	849	1.3914	983	857	1.4222	88	857	0.1821		gi|27819785|gb|AAO24941.1| RE65015p [Drosophila melanogaster]
sw04259	609	809	0.8566	352	623	0.7956	790	955	0.96	117	975	0.1472		gi|66545439|ref|XP_392229.2| PREDICTED: similar to GA18075-PA [Apis mellifera]
sw04271	8243	9881	0.6757	9012	9210	0.9916	7123	8726	0.8464	5697	10989	0.3937		gi|87248371|gb|ABD36238.1| nucleosome assembly protein [Bombyx mori]
sw04276	444	579	0.875	411	586	0.8301	139	259		119	2422	0.0487		gi|4090964|gb|AAD09279.1| immune-related Hdd1 [Hyphantria cunea]
sw04284	430	567	0.8695	661	596	1.189	1541	844	1.6603	2819	631	4.9711		gi|72143291|ref|XP_797528.1| PREDICTED: similar to solute carrier family 27 (fatty acid transporter), member 4 [Strongylocentrotus purpuratus]
sw04330	2850	2904	0.9608	3476	2653	1.367	5986	2011	3.3627	823	2082	0.5071		gi|13786144|ref|NP_112614.1| prolyl endopeptidase [Rattus norvegicus] rPOP [Rattus norvegicus]
sw04333	11220	12647	0.7855	15409	8559	1.6153	14102	7347	1.9057	1828	12087	0.1187		gi|29134779|dbj|BAC66140.1| projectin [Procambarus clarkii]
sw04341	238	943	0.3372	105	199		21	180		18	329			gi|72172203|gb|AAZ66799.1| lipase [Samia cynthia ricini] lipase-1 [Bombyx mori] lipase [Bombyx mori]
sw04343	786	1427	0.5568	420	992	0.4657	314	792	0.5191	151	666	0.3651		gi|13325124|gb|AAH04375.1| 24-dehydrocholesterol reductase [Homo sapiens] 24-dehydrocholesterol reductase precursor [Homo sapiens] 3beta-hydroxysterol delta 24 reductase [Homo sapiens] seladin-1 [Homo sapiens] 24-dehydrocholesterol reductase, precursor [Homo sapiens] 24-dehydrocholesterol reductase precursor (3-beta-hydroxysterol delta-24-reductase) (Seladin-1) (Diminuto/dwarf1 homolog)
sw04349	1196	1830	0.7595	1459	2250	0.6837	1457	1839	0.8403	183	1971	0.1077		gi|66508930|ref|XP_624461.1| PREDICTED: similar to CG12026-PA, isoform A, partial [Apis mellifera]
sw04353	593	847	0.8323	552	777	0.8362	832	733	1.3277	1242	522	2.7068
sw04359	1372	1213	1.0877	1357	1126	1.2673	1052	681	2.0373	999	922	1.1883		gi|45501218|gb|AAH67100.1| FAS-associated factor 1, isoform a [Homo sapiens] FAS-associated factor 1, isoform a [Homo sapiens] FAS-associated factor 1 isoform a [Homo sapiens] Fas-associated protein factor FAF1 [Homo sapiens] Fas (TNFRSF6) associated factor 1 [Homo sapiens] Fas (TNFRSF6) associated factor 1 [Homo sapiens] Fas (TNFRSF6) associated factor 1 [Homo sapiens] CGI-03 protein [Homo sapie…
sw04363	4611	5935	0.6512	5699	4795	1.1125	2579	3049	1.0104	1417	4274	0.2881
sw04364	1525	1317	1.0938	1965	2244	0.787	964	1834	0.6117	2945	1258	3.4234		gi|87248227|gb|ABD36166.1| short-chain dehydrogenease/reductase 2 [Bombyx mori]
sw04368	3131	2377	1.1559	3462	1972	1.6953	5332	1279	4.0295	219	2138	0.0978
sw04377	1414	1731	0.8569	1691	1669	1.0231	3316	1624	1.8846	4703	1573	2.8019		gi|27733421|gb|AAO21508.1| serine protease-like protein [Manduca sexta]
sw04379	2049	1314	1.4314	2601	2064	1.2078	7720	1207	7.5976	81	1857	0.0657		gi|79317517|ref|NP_001031018.1| transporter [Arabidopsis thaliana] transporter [Arabidopsis thaliana] At1g10390/F14N23_29 [Arabidopsis thaliana] At1g10390/F14N23_29 [Arabidopsis thaliana]
sw04387	969	3425	0.2739	156	247		346	364		153	1261	0.1842		gi|39579351|emb|CAE56519.1| Hypothetical protein CBG24242 [Caenorhabditis briggsae]
sw04396	544	475	1.1887	661	590	1.1198	412	491	0.956	1072	571	2.3853		gi|695387|gb|AAC37254.1| luciferase luciferase
sw04397	3779	4440	0.8016	5059	5872	0.7865	1844	3942	0.5132	1194	4459	0.3261		gi|87248141|gb|ABD36123.1| glucosamine-6-phosphate N-acetyltransferase [Bombyx mori]
sw04398	1875	2926	0.6794	2117	2787	0.7549	1480	2094	0.7415	1398	3045	0.4599		gi|51259477|gb|AAH79397.1| Hypothetical protein LOC361452 [Rattus norvegicus] hypothetical protein LOC361452 [Rattus norvegicus]
sw04412	1048	970	0.9857	1577	1003	1.3655	808	704	1.2772	152	1192	0.1946		gi|6272693|gb|AAF06164.1| long microtubule-associated protein 1A; long MAP1A [Mus musculus] Microtubule-associated protein 1A (MAP 1A)
sw04417	921	1083	0.9989	1209	1430	1.0727	1268	1478	0.872	1233	672	2.2787		gi|26985165|gb|AAN86250.1| caspase-1 [Bombyx mori]
sw04425	696	974	0.8769	478	882	0.8163	803	1004	0.8529	1258	473	3.3647		gi|15080238|gb|AAH11888.1| Solute carrier family 35, member B1 [Homo sapiens]
sw04448	1168	942	1.4673	1896	2104	0.9986	2441	1918	1.2304	2648	738	3.838		gi|6735391|emb|CAB69047.1| fructose-1,6-bisphosphatase [Caenorhabditis elegans] K07A3.1 [Caenorhabditis elegans] Fructose-1,6-biphosphatase protein 1 [Caenorhabditis elegans]
sw04475	95	175		85	200		3244	579	4.6724	7	136
sw04515	297	315		176	253		109	274		2157	441	5.4781		gi|73976657|ref|XP_539546.2| PREDICTED: similar to aminoadipate-semialdehyde synthase [Canis familiaris]
sw04517	799	3164	0.2748	1102	6289	0.1874	428	1144	0.3803	3719	1291	3.3897		gi|49532884|dbj|BAD26677.1| Juvenile hormone diol kinase [Plutella xylostella]
sw04561	533	2458	0.2775	493	1332	0.4574	476	773	0.7073	118	459	0.4983		gi|55583303|dbj|BAD69569.1| aquaporin [Bombyx mori]
sw04565	297	594	0.6601	458	541	0.9924	266	499	0.6841	1015	262	4.6537		gi|62002223|gb|AAX58711.1| pheromone-degrading enzyme 1 [Antheraea polyphemus]
sw04575	767	852	0.854	605	682	0.9784	365	669	0.6768	2256	755	3.3813		gi|66514150|ref|XP_396407.2| PREDICTED: similar to heparan sulfate (glucosamine) 3-O-sulfotransferase 5 [Apis mellifera]
sw04596	1960	1559	1.0844	2350	2069	0.9849	2287	1142	2.1689	2512	1401	1.8097		No hits found
sw04645	1218	1246	1.1093	1434	1618	1.0571	2004	2919	0.6296	49	2102	0.0427		gi|4090966|gb|AAD09280.1| immune-related Hdd11 [Hyphantria cunea]
sw04646	4436	3967	1.1116	5774	4669	1.1749	7108	3789	1.9177	2011	4267	0.4851		gi|30179310|gb|EAA45710.1| ENSANGP00000023741 [Anopheles gambiae str. PEST] ENSANGP00000026391 [Anopheles gambiae str. PEST] ENSANGP00000023756 [Anopheles gambiae str. PEST] ENSANGP00000023756 [Anopheles gambiae str. PEST] ENSANGP00000026391 [Anopheles gambiae str. PEST] ENSANGP00000023741 [Anopheles gambiae str. PEST]
sw04649	481	580	1.0786	617	920	0.8792	229	956	0.2261	18	641	0.0928		No hits found
sw04795	1357	1689	0.7215	1888	2363	0.7515	1971	2449	0.8924	2010	909	2.58		gi|9631087|ref|NP_047757.1| ribonucleotide reductase small subunit homolog [Lymantria dispar nucleopolyhedrovirus] ribonucleotide reductase small subunit homolog [Lymantria dispar nucleopolyhedrovirus]
sw04840	149	221		15799	8415	1.8119	92	605	0.1862	3804	15434	0.1634
sw04861	802	774	1.2455	767	683	1.3954	2813	983	2.8484	7	933	0.0418		gi|66550559|ref|XP_397430.2| PREDICTED: similar to sensory neuron membrane protein 1 [Apis mellifera]
sw04910	395	453	1.0745	414	431	1.2294	197	298		1339	404	4.3742
sw04958	1502	1445	1.1375	2838	1957	1.5011	5620	2258	2.429	5135	874	5.6942		gi|24641134|ref|NP_727465.1| CG1637-PB, isoform B [Drosophila melanogaster] CG1637-PB, isoform B [Drosophila melanogaster]
sw04986	1083	1291	0.9281	1412	1734	0.8081	918	1458	0.666	127	1773	0.1087		gi|54311237|gb|AAH84811.1| LOC495348 protein [Xenopus laevis]
sw05002	586	1304	0.5614	350	929	0.5662	507	706	0.7389	131	927	0.2304		gi|54642323|gb|EAL31072.1| GA15131-PA [Drosophila pseudoobscura]
sw05025	1506	1417	1.1842	1834	1536	1.3933	2478	1170	2.1464	6635	625	7.9901		gi|57619080|ref|NP_001009860.1| lysosomal beta-galactosidase [Felis catus] Beta-galactosidase precursor (Lactase) (Acid beta-galactosidase) lysosomal beta-galactosidase [Felis catus]
sw05029	688	761	1.1171	851	1267	0.8442	1240	1436	0.8137	1966	829	2.1949		gi|72004713|ref|XP_785235.1| PREDICTED: similar to phosphatidylinositol glycan, class K (predicted) [Strongylocentrotus purpuratus]
sw05070	10239	5495	1.5234	16240	8952	1.4827	11059	7900	1.411	34969	2023	13.3321
sw05083	1414	1727	0.7492	1403	1578	0.9083	1790	1919	1.0135	374	1293	0.3672		gi|24660041|ref|NP_729248.1| Sh3 CG8582-PA, isoform A [Drosophila melanogaster] Sh3 CG8582-PB, isoform B [Drosophila melanogaster] LD12912p [Drosophila melanogaster] CG8582-PB, isoform B [Drosophila melanogaster] CG8582-PA, isoform A [Drosophila melanogaster] SH3 domain-binding glutamic acid-rich protein homolog (SH3BGR protein)
sw05084	164	569	0.3442	85	867	0.1399	54	258		54	403	0.2943
sw05092	5530	3535	1.3341	10682	6586	1.378	14095	5245	3.4581	16374	2232	6.17		gi|87248513|gb|ABD36309.1| homocysteine S-methyltransferase [Bombyx mori]
sw05099	1601	1085	1.5743	1566	1636	0.9917	840	1264	0.7631	1893	834	2.5471		gi|89273430|emb|CAJ82650.1| transmembrane emp24 domain trafficking protein 2 [Xenopus tropicalis]
sw05100	2335	2349	0.9152	3155	2976	0.9693	2793	2575	1.1563	3315	1324	2.4442		No hits found
sw05107	11520	5975	1.4924	7082	9230	0.7165	5173	7533	0.7931	425	6185	0.0738		gi|56378319|dbj|BAD74196.1| heat shock protein hsp20.1 [Bombyx mori]
sw05120	17940	11811	1.0704	20014	16402	1.0324	4893	12803	0.5093	893	21167	0.0347
sw05170	6634	5423	1.1498	10463	4668	1.9414	9862	4006	2.6585	898	5960	0.177		gi|1070611|pir||FAFFAA alpha-actinin - fruit fly (Drosophila melanogaster)
sw05172	1423	1270	0.9877	1779	1667	0.9415	1652	1566	1.1292	3257	1233	2.6286		gi|74006595|ref|XP_859139.1| PREDICTED: similar to spermine synthase isoform 4 [Canis familiaris]
sw05198	9514	8557	1.0456	10833	10783	1.0968	6796	12431	0.579	1568	6801	0.2559		gi|20334294|dbj|BAB91145.1| beta-glucosidase [Neotermes koshunensis]
sw05204	3116	3673	0.8419	2838	3030	1.0206	2948	3331	0.8748	1190	2753	0.4436
sw05206	725	1261	0.6642	453	847	0.732	523	1021	0.6087	306	1257	0.3503		gi|76616685|ref|XP_609698.2| PREDICTED: similar to F-box/LRR-repeat protein 14 (F-box and leucine-rich repeat protein 14) [Bos taurus]
sw05224	846	757	1.2804	790	823	1.1408	1305	663	2.0371	674	829	1.0424		gi|87248335|gb|ABD36220.1| glutamyl-tRNA amidotransferase subunit B [Bombyx mori]
sw05230	3910	3495	1.121	4869	4977	0.964	3890	4369	0.8732	12133	2437	4.2342		gi|49114072|gb|AAH26214.2| Leucine-zipper-like transcription regulator, 1 [Homo sapiens] leucine-zipper-like transcription regulator, 1 [Homo sapiens] Leucine-zipper-like transcriptional regulator 1 (LZTR-1) LZTR1 [Homo sapiens]
sw05281	1302	1938	0.7265	1853	1451	1.3601	1930	1228	1.7242	2302	1325	2.0169		gi|54643628|gb|EAL32371.1| GA21508-PA [Drosophila pseudoobscura]
sw05302	31382	36597	0.7181	16940	28282	0.5386	1278	4579	0.3604	964	57697	0.0146		gi|47605412|sp|Q7M4F2|CUD8_SCHGR Endocuticle structural glycoprotein SgAbd-8
sw05311	1022	1090	0.9366	1143	1174	1.0466	784	957	1.0544	414	1065	0.4997		gi|24639594|ref|NP_570081.2| CG15239-PA [Drosophila melanogaster] CG15239-PA [Drosophila melanogaster]
sw05314	1969	2077	1.0135	2482	3260	0.7692	1203	2386	0.6221	1606	3948	0.4865		gi|27695162|gb|AAH43795.1| Mak16l-prov protein [Xenopus laevis] MAK16-like protein RBM13 B (RNA binding motif protein 13-like B)
sw05345	5739	5765	0.9021	7937	8755	0.8018	5227	9088	0.6105	26548	2637	8.087		gi|83286866|sp|Q60534|CF105_MESAU Protein C6orf105 homolog (Androgen-dependent expressed protein FAR-17a) androgen-dependent expressed protein
sw05363	689	804	0.8135	564	746	0.7603	1219	785	1.7758	948	370	3.4196
sw05372	2720	1739	1.3402	2458	2762	0.7807	1305	1781	0.7793	10364	1241	7.3641		gi|726303|gb|AAB41454.1| follicle-specific yolk polypeptide-4 [Galleria mellonella]
sw05378	765	1505	0.6191	388	708	0.836	883	1513	0.5888	89	847	0.1861		gi|3004821|gb|AAC39088.1| putative inorganic phosphate cotransporter [Drosophila ananassae] Putative inorganic phosphate cotransporter
sw05447	3661	4665	0.5859	3959	3628	1.0365	2117	3750	0.6319	159	3694	0.0411		gi|20514772|ref|NP_620609.1| lin-10 protein homolog [Rattus norvegicus] UPF0183 protein lin-10 protein homolog [Rattus norvegicus]
sw05452	1539	1414	1.0013	2069	2014	0.9314	2741	1859	1.3733	9742	1081	10.1535		gi|41016826|sp|Q27772|C1TC_SPOFR C-1-tetrahydrofolate synthase, cytoplasmic (C1-THF synthase) [Includes: Methylenetetrahydrofolate dehydrogenase ; Methenyltetrahydrofolate cyclohydrolase ; Formyltetrahydrofolate synthetase ] methylenetetrahydrofolate dehydrogenase methylenetetrahydrofolate dehydrogenase-cyclohydrolase-synthetase
sw05458	1659	728	2.4898	2213	1175	2.0092	3867	658	8.8652	377	536	0.9945		gi|72074172|ref|XP_800520.1| PREDICTED: hypothetical protein XP_795427, partial [Strongylocentrotus purpuratus]
sw05478	4241	3255	1.2409	3902	4240	0.9088	2814	4204	0.7581	6030	2902	2.0937		gi|62648312|ref|XP_342783.2| PREDICTED: similar to CGI-141 protein [Rattus norvegicus]
sw05492	944	776	1.2538	802	744	1.1058	751	742	1.1345	364	1143	0.4461		gi|47132565|ref|NP_444255.2| myosin light chain kinase isoform 3A [Homo sapiens]
sw05528	319	437	0.8363	333	480	0.7718	287	393		132	847	0.2042		gi|55243907|gb|EAA06074.2| ENSANGP00000015865 [Anopheles gambiae str. PEST] ENSANGP00000015865 [Anopheles gambiae str. PEST]
sw05534	6573	8756	0.6923	14007	15447	0.8857	5625	5521	1.1334	2291	11308	0.2103		gi|13591614|dbj|BAB40959.1| prophenoloxidase-2s [Bombyx mori]
sw05547	1369	1096	1.1445	1611	1434	1.1259	2368	2274	1.0971	27	1153	0.0528		gi|24416622|dbj|BAC22502.1| putative pheromone-degrading enzyme [Antheraea polyphemus]
sw05556	8293	7038	0.816	11418	7980	1.1065	10268	7873	1.4067	1150	6468	0.1673		gi|76154907|gb|AAX26303.2| SJCHGC05310 protein [Schistosoma japonicum]
sw05615	965	1448	0.708	1188	1025	1.3384	549	1126	0.5928	216	1540	0.1524		gi|46047377|ref|NP_990864.1| homeo box (H6 family) 1 [Gallus gallus] homeodomain protein GH6 [Gallus gallus]
sw05622	1687	1706	1.0567	1316	939	1.5893	468	938	0.4953	98	1347	0.099
sw05629	458	455	1.3405	965	996	1.1618	1106	793	1.442	1608	292	5.5633
sw05634	789	871	0.993	470	487	1.2002	196	314		190	820	0.3363		gi|82922857|ref|XP_923420.1| PREDICTED: similar to family with sequence similarity 46, member A isoform 2 [Mus musculus]
sw05641	2013	2023	0.9673	2702	3222	0.8976	3341	3472	0.9699	4431	1880	2.3206
sw05642	1109	1379	0.854	1177	1366	0.9376	1304	1063	1.3255	138	1152	0.1722		gi|85857460|gb|ABC86266.1| RE45749p [Drosophila melanogaster]
sw05643	3519	2340	1.3052	6375	4740	1.2409	9100	5072	1.6449	13840	1303	10.9466		gi|87248517|gb|ABD36311.1| kazal-type proteinase inhibitor [Bombyx mori]
sw05661	1740	1103	1.5677	1612	1738	0.9925	2249	1049	2.373	1517	1803	0.8366		No hits found
sw05663	1317	1129	1.135	618	752	0.9311	590	783	0.8389	133	1237	0.152		gi|46981561|gb|AAT07829.1| TGF-beta-activated kinase TAK1 [Danio rerio]
sw05670	506	521	1.1608	592	649	1.091	727	661	1.3321	1771	351	6.4638		gi|50732421|ref|XP_418628.1| PREDICTED: similar to parathion hydrolase (phosphotriesterase)-related protein [Gallus gallus]
sw05671	288	419	0.8318	345	444	0.9961	193	382		1428	396	4.2895		gi|72067168|ref|XP_795216.1| PREDICTED: similar to putative protein of bilaterial origin (49.2 kD) (3G698), partial [Strongylocentrotus purpuratus]
sw05700	24447	17182	1.021	39462	32122	0.963	27572	41087	0.7709	44580	9119	6.0281		gi|49089585|gb|AAT51799.1| lysozyme i-1 [Anopheles gambiae]
sw05701	1444	1549	0.9798	1031	1157	0.9701	926	1683	0.6184	2942	1216	2.0857		gi|48108726|ref|XP_393098.1| PREDICTED: similar to ENSANGP00000022305 [Apis mellifera]
sw05710	148	201		236	264		119	269		940	230	6.0387
sw05730	1557	1293	1.2436	1373	1122	1.3253	1276	777	1.5673	1639	684	2.4723
sw05732	1560	1081	1.2876	1381	1126	1.1336	866	587	1.5986	158	1757	0.1088
sw05736	300	483	0.6826	528	1020	0.4617	192	459	0.5267	29	356			gi|55243253|gb|EAA06260.2| ENSANGP00000017293 [Anopheles gambiae str. PEST] ENSANGP00000017293 [Anopheles gambiae str. PEST]
sw05773	2507	3159	0.8541	1786	2845	0.781	2397	3028	0.7516	284	2218	0.1817		gi|54644199|gb|EAL32940.1| GA13521-PA [Drosophila pseudoobscura]
sw05792	334	355		217	387		1991	477	3.9667	26	269			gi|4105503|gb|AAD02436.1| multiple inositol polyphosphate phosphatase 1; MIPP1 [Drosophila melanogaster]
sw05812	362	494	0.8739	291	480	0.7871	474	466	1.0215	929	540	2.0687
sw05815	5261	6049	0.706	6352	6282	0.9691	3863	4337	0.9214	3667	8294	0.4471		gi|51703446|gb|AAH81008.1| Wdr5-b-prov protein [Xenopus laevis] WD repeat domain 5 [Xenopus tropicalis] WD repeat domain 5 [Xenopus tropicalis] WD repeat domain 5 [Xenopus tropicalis]
sw05837	1186	1698	0.7316	1269	1537	0.9291	1164	1429	0.8012	7848	2619	2.7746		gi|38638820|gb|AAR25648.1| Abnormal cell migration protein 10, isoform c [Caenorhabditis elegans] abnormal cell MIGration family member (mig-10) [Caenorhabditis elegans] Abnormal cell migration protein 10
sw05842	4274	3311	1.2136	5418	6248	0.8587	3797	4038	1.1202	19254	1830	12.9613
sw05844	169	169		194	197		875	270	3.6155	44	203			gi|55656832|ref|XP_514836.1| PREDICTED: enterokinase [Pan troglodytes]
sw05879	1512	2127	0.658	1569	3006	0.5162	705	3148	0.2454	51	1534	0.0608		gi|76630146|ref|XP_582319.2| PREDICTED: similar to retinol dehydrogenase 14 (all-trans and 9-cis) [Bos taurus]
sw05889	2259	2297	0.9786	2779	3155	0.8953	1804	2476	0.8294	1564	3700	0.4104		gi|7141239|gb|AAF37264.1| eukaryotic translation initiation factor 3 p66 subunit [Drosophila melanogaster]
sw05922	331	221		988	888	1.2249	1400	500	2.5251	3819	284	13.5879		gi|2498144|sp|Q25490|APLP_MANSE Apolipophorins precursor [Contains: Apolipophorin-2 (Apolipophorin II) (apoLp-2); Apolipophorin-1 (Apolipophorin I) (apoLp-1)] apolipophorin precursor protein
sw05928	1308	1151	1.0236	1943	1565	1.1115	1787	1642	1.1108	7117	1113	6.3938		gi|83721062|ref|YP_442850.1| dihydroxyacetone kinase [Burkholderia thailandensis E264] dihydroxyacetone kinase [Burkholderia thailandensis E264]
sw05947	1264	1074	1.0616	469	620	0.774	522	1299	0.4637	66	1006	0.0865
sw05953	590	464	1.5766	1139	1244	1.1648	661	1482	0.4516	3524	570	6.8748		gi|48139441|ref|XP_397008.1| PREDICTED: similar to Diacetyl/L-xylulose reductase [Apis mellifera]
sw05969	15529	12917	1.0437	20306	20463	1.0685	15323	17882	0.9851	1724	27712	0.0585		gi|24637395|gb|AAN63675.1| chemosensory protein [Helicoverpa zea]
sw05970	1278	3312	0.3906	2558	1485	1.9451	4287	1463	3.7182	101	1293	0.1255		gi|26007526|gb|AAF71290.2| chemosensory protein [Mamestra brassicae]
sw05973	5363	6701	0.7635	5493	6440	0.9784	7051	6659	1.154	291	8435	0.0394		gi|66499088|ref|XP_624151.1| PREDICTED: similar to ENSANGP00000012173 [Apis mellifera]
sw05989	125	232		499	595	1.1489	5547	1212	4.9737	34	199			No hits found
sw05999	2184	2510	0.835	2099	1991	1.147	3545	1979	1.8032	958	2240	0.4008		gi|74003072|ref|XP_856901.1| PREDICTED: similar to Succinate dehydrogenase [ubiquinone] flavoprotein subunit, mitochondrial precursor (Fp) (Flavoprotein subunit of complex II) isoform 5 [Canis familiaris]
sw06000	1912	1731	1.1228	3823	3893	0.9866	3308	4110	0.7325	8608	1509	7.9215		gi|45550887|ref|NP_652364.3| CG16926-PA [Drosophila melanogaster] LP01766p [Drosophila melanogaster] CG16926-PA [Drosophila melanogaster]
sw06011	1811	1897	0.8893	1677	1880	0.9219	2146	1675	1.2585	2386	1254	2.0693		gi|14043183|gb|AAH07579.1| X-prolyl aminopeptidase (aminopeptidase P) 1, soluble [Homo sapiens] X-prolyl aminopeptidase (aminopeptidase P) 1, soluble [Homo sapiens] X-prolyl aminopeptidase (aminopeptidase P) 1, soluble (SAMP, XPNPEP, XPNPEPL) [Homo sapiens] X-prolyl aminopeptidase (aminopeptidase P) 1, soluble [Homo sapiens] XPNPEP1 [Homo sapiens] cytosolic aminopeptidase P [Homo sapiens] Xaa-Pro…
sw06048	144	269		261	333		174	278		878	266	4.1213		gi|83570494|ref|ZP_00921938.1| COG0665: Glycine/D-amino acid oxidases (deaminating) [Shigella dysenteriae 1012]
sw06067	15970	22905	0.5101	20777	18185	1.0417	10289	7845	1.5969	2645	19083	0.1165
sw06076	686	705	1.0295	393	405	1.0981	679	430	1.7376	1871	620	4.0734		gi|53734276|gb|AAH83780.1| Sphingomyelin phosphodiesterase 1, acid lysosomal [Rattus norvegicus] sphingomyelin phosphodiesterase 1, acid lysosomal [Rattus norvegicus]
sw06079	611	1080	0.5975	998	1246	0.8562	411	491	1.2028	164	972	0.2563		gi|6448469|dbj|BAA86911.1| homologue of Sarcophaga 26,29kDa proteinase [Periplaneta americana]
sw06080	361	1133	0.331	255	554	0.5082	132	404	0.6773	64	555	0.2496		gi|57918359|ref|XP_556995.1| ENSANGP00000028630 [Anopheles gambiae str. PEST] ENSANGP00000028630 [Anopheles gambiae str. PEST]
sw06084	1912	2074	0.8501	2424	2419	0.9056	2310	3413	0.7624	2746	1440	2.6673		gi|13359088|dbj|BAB33293.1| Serpin-like protein (SEP-LP) [Bombyx mori]
sw06085	1295	1724	0.7972	893	1376	0.6931	2485	1710	1.7061	103	1617	0.1325		gi|27819893|gb|AAL29090.2| LP03106p [Drosophila melanogaster]
sw06088	7772	7017	0.8891	13167	12557	0.8563	10559	11614	1.0074	14778	5425	3.3457		gi|87248533|gb|ABD36319.1| cytosolic malate dehydrogenase [Bombyx mori]
sw06096	233	312		454	363	1.5125	354	267		1075	425	4.4957		gi|55243047|gb|EAA06880.2| ENSANGP00000011833 [Anopheles gambiae str. PEST] ENSANGP00000011833 [Anopheles gambiae str. PEST]
sw06122	2252	1772	1.2716	2551	2138	1.2241	2544	858	2.6324	2439	2287	1.0464		gi|18158449|ref|NP_542959.1| coatomer protein complex, subunit beta 1 [Rattus norvegicus] Coatomer protein complex, subunit beta 1 [Rattus norvegicus] Coatomer subunit beta (Beta-coat protein) (Beta-COP) beta COP [Rattus norvegicus]
sw06200	6217	4280	1.234	12260	8959	1.0814	11939	10049	1.0828	24269	3175	6.6169		gi|56971148|gb|AAH87960.1| Glycine N-methyltransferase [Mus musculus]
sw06237	701	457	1.7209	684	1240	0.6191	753	1434	0.4826	30	647	0.1109		gi|28317060|gb|AAO39549.1| RE03380p [Drosophila melanogaster]
sw06242	608	720	0.9725	987	1269	0.8372	220	629	0.4555	80	1233	0.1147		gi|28435741|gb|AAO41719.1| glutathione S-transferase 1 [Bombyx mori]
sw06248	9023	5616	1.3117	9280	5436	1.4697	6401	3126	2.5001	1917	9422	0.1933		gi|2653671|gb|AAC15893.1| 120 kDa style glycoprotein [Nicotiana alata]
sw06251	1023	1855	0.5263	1059	2325	0.4332	664	1361	0.5525	1192	2397	0.5829
sw06274	515	1006	0.6108	513	653	0.9893	1623	591	2.9162	380	1205	0.465		gi|26665875|ref|NP_758439.1| exonuclease GOR [Homo sapiens] exonuclease GOR [Homo sapiens] Exonuclease GOR (Antigen GOR) (RNA exonuclease 1 homolog-like)
sw06276	1187	1240	0.9283	1369	1244	1.0735	1837	1160	1.6735	115	2227	0.0464
sw06288	5584	5472	0.8462	6155	5443	0.9809	3643	3608	1.1006	1552	5020	0.2908		gi|89268895|emb|CAJ83712.1| novel protein [Xenopus tropicalis]
sw06291	775	751	1.0018	438	673	0.7468	867	995	1.0005	1056	600	2.1695		gi|86450723|gb|ABC96697.1| yellow4 [Bombyx mori]
sw06322	868	1167	0.8434	925	1324	0.7272	1406	1300	1.1324	2472	655	4.5722		gi|1663690|dbj|BAA08704.1| DNA supercoiling factor [Bombyx mori]
sw06329	3343	3134	0.9377	5565	4041	1.302	5411	4256	1.3004	7489	2046	3.067		gi|87248167|gb|ABD36136.1| isocitrate dehydrogenase [Bombyx mori]
sw06348	1493	1605	1.0499	1610	2238	0.867	922	1155	0.7571	351	1084	0.4412		gi|90205283|ref|ZP_01207923.1| conserved hypothetical proline and threonine rich protein [Mycobacterium vanbaalenii PYR-1] conserved hypothetical proline and threonine rich protein [Mycobacterium vanbaalenii PYR-1]
sw06350	3318	4440	0.7853	3070	4594	0.8166	3540	5016	0.7426	1639	4053	0.44		gi|4680715|gb|AAD27747.1| CGI-38 protein [Homo sapiens]
sw06370	126	162		181	306		397	147		822	219	4.8107		gi|76643627|ref|XP_580618.2| PREDICTED: similar to Bleomycin hydrolase (BLM hydrolase) (BMH) (BH) [Bos taurus]
sw06372	2395	3026	0.7227	3247	2988	1.1332	1297	2716	0.44	81	3334	0.0171		gi|33636457|gb|AAQ23526.1| RH66336p [Drosophila melanogaster]
sw06402	7679	5849	1.1238	8497	7324	1.0257	7617	7646	1.0082	714	9104	0.0753		gi|66516898|ref|XP_391826.2| PREDICTED: similar to yellow [Apis mellifera]
sw06407	2349	2507	0.7713	1409	1605	0.91	892	1422	0.7367	113	2043	0.061		gi|55959778|emb|CAI16505.1| KIAA0853 [Homo sapiens] KIAA0853 [Homo sapiens] Protein KIAA0853
sw06412	1788	1933	0.8355	1913	2205	0.7977	1659	1685	0.9469	676	2008	0.3509		gi|66519838|ref|XP_391911.2| PREDICTED: similar to GA10180-PA [Apis mellifera] PREDICTED: similar to GA10180-PA [Apis mellifera]
sw06416	383	385		695	977	0.7313	269	384		3609	403	12.8632		gi|68404433|ref|XP_694901.1| PREDICTED: similar to cubilin, partial [Danio rerio]
sw06424	1537	893	1.751	2185	1789	1.1365	713	1431	0.5242	76	2550	0.0403		gi|6560645|gb|AAF16700.1| juvenile hormone binding protein precursor-like protein [Manduca sexta]
sw06436	32303	19727	1.2004	52427	41280	0.9415	17494	31716	0.5115	1564	41971	0.0345		No hits found
sw06482	401	497	1.0139	607	912	0.7288	263	1007	0.3365	52	783	0.1338
sw06498	1259	1869	0.7341	1533	1733	0.9196	2370	2256	1.057	7	1892	0.0098		gi|57966866|ref|XP_562320.1| ENSANGP00000027535 [Anopheles gambiae str. PEST] ENSANGP00000027535 [Anopheles gambiae str. PEST]
sw06503	3091	2042	1.274	2576	2517	0.9824	2251	2946	0.8249	1186	2917	0.4416		gi|13360618|dbj|BAB34581.1| periplasmic glucose-1-phosphatase [Escherichia coli O157:H7] periplasmic glucose-1-phosphatase [Escherichia coli O157:H7] periplasmic glucose-1-phosphatase [Escherichia coli O157:H7 EDL933] periplasmic glucose-1-phosphatase [Escherichia coli O157:H7 EDL933]
sw06507	650	746	0.8677	468	666	0.7619	738	543	1.4822	1015	623	2.0463		gi|50755467|ref|XP_414753.1| PREDICTED: similar to family with sequence similarity 20, member C; IMAGE:4942737 [Gallus gallus]
sw06519	31638	19188	1.0693	36783	33073	0.9251	13484	37216	0.3828	1694	34269	0.0364		gi|5360249|dbj|BAA81902.1| cuticle protein LCP18 [Bombyx mori] LCP18 [Bombyx mori]
sw06554	590	4157	0.1403	107	3427	0.0445	62	1633	0.0422	39	1140	0.0689		gi|61555076|gb|AAX46656.1| tetraspanin similiar to uroplakin 1 [Bos taurus] Tetraspanin-18 (Tspan-18)
sw06569	1066	1352	0.8835	1704	1954	1.0286	2199	1709	1.2474	22	1349	0.041		gi|55242208|gb|EAL40896.1| ENSANGP00000027230 [Anopheles gambiae str. PEST] ENSANGP00000012173 [Anopheles gambiae str. PEST] ENSANGP00000027230 [Anopheles gambiae str. PEST] ENSANGP00000012173 [Anopheles gambiae str. PEST]
sw06572	505	641	0.9172	454	738	0.7324	720	850	0.8487	1312	601	3.2676		gi|76651259|ref|XP_589337.2| PREDICTED: similar to Autosomal Highly Conserved Protein [Bos taurus]
sw06577	153	212		264	240		728	230	3.7352	852	337	2.8823
sw06580	2409	1711	1.3647	4790	3926	1.0819	4703	3187	1.3495	7768	2065	3.4834		gi|88913546|sp|Q6AWN0|MTND_DROME 1,2-dihydroxy-3-keto-5-methylthiopentene dioxygenase (Aci-reductone dioxygenase) (ARD)
sw06585	8679	7586	1.0343	13004	5400	2.2518	11688	3644	3.1793	1254	8102	0.1801		gi|22474516|dbj|BAC10620.1| Titin-like protein [Bombyx mori]
sw06587	351	458	0.8884	188	485	0.592	182	1016	0.2676	515	286	2.3056		gi|15128501|dbj|BAB62746.1| soluble alakaline phosphatase [Bombyx mori] soluble alkaline phosphatase [Bombyx mori]
sw06604	776	5808	0.1254	122	251		61	196		115	1171	0.118		gi|2224921|gb|AAC47557.1| insect intestinal mucin IIM22 [Trichoplusia ni]
sw06613	24556	36279	0.4786	27102	44814	0.5279	7584	27861	0.2338	939	52924	0.0153		gi|28317017|gb|AAO39528.1| RE22242p [Drosophila melanogaster]
sw06616	666	1040	0.6512	886	1162	0.7545	513	894	0.6161	226	940	0.3123		gi|66499374|ref|XP_394212.2| PREDICTED: similar to ENSANGP00000019302 [Apis mellifera]
sw06658	19367	8533	2.072	20998	9534	2.0536	33771	6115	4.6942	39732	8130	4.3724		gi|77556574|gb|ABA99370.1| DEAD/DEAH box helicase, putative [Oryza sativa (japonica cultivar-group)]
sw06667	2986	2382	1.1265	3535	2216	1.57	2635	1257	2.7199	3793	1555	2.5367		gi|89305223|gb|EAS03211.1| Type III restriction enzyme, res subunit family protein [Tetrahymena thermophila SB210]
sw06670	360	657	0.7113	880	1185	0.8596	676	1353	0.6503	2376	741	3.9197		gi|62858811|ref|NP_001016963.1| dihydrolipoamide branched chain transacylase E2 [Xenopus tropicalis] Dihydrolipoyllysine-residue Dihydrolipoamide branched chain transacylase (BCKAD E2) [Xenopus tropicalis]
sw06691	4625	2321	1.5968	4626	3179	1.378	7031	3477	2.0853	8837	1897	4.1992		gi|45330818|dbj|BAD12426.1| fructose 1,6-bisphosphate aldolase [Antheraea yamamai]
sw06702	2985	2848	1.0403	3970	4693	0.7962	4083	3952	1.0507	12838	1531	7.6031		gi|54648179|gb|AAH85074.1| LOC495489 protein [Xenopus laevis]
sw06703	2364	1935	1.0597	28697	24579	0.9473	32709	57052	0.7123	57726	1019	43.6211		gi|114240|sp|P14296|ARYA_MANSE Arylphorin alpha subunit precursor arylphorin alpha subunit precursor arylphorin alpha subunit
sw06717	609	398	1.623	1093	1136	1.022	421	862	0.6326	34	882	0.1073		No hits found
sw06735	571	862	0.8845	481	1036	0.7126	410	875	0.5463	87	805	0.216
sw06737	194	269		68	309		51	252		1435	201	9.3587		gi|126415|sp|P09334|LP1_BOMMO Low molecular 30 kDa lipoprotein PBMHP-6 precursor 30K protein precursor [Bombyx mori]
sw06745	671	948	0.8763	805	850	1.2336	497	588	0.881	274	907	0.4342		gi|55246250|gb|EAA03756.2| ENSANGP00000021709 [Anopheles gambiae str. PEST] ENSANGP00000021709 [Anopheles gambiae str. PEST]
sw06748	2017	2260	0.9415	2159	1873	1.305	2444	2092	1.1338	328	2194	0.1731		gi|37589364|gb|AAH59305.1| MGC68950 protein [Xenopus laevis] Dynactin-1
sw06755	2783	2502	1.0432	2132	1908	1.2126	1628	1417	1.2237	1381	2787	0.4517		gi|89286739|gb|EAR84735.1| Mov34/MPN/PAD-1 family protein [Tetrahymena thermophila SB210]
sw06771	4529	4362	0.8747	7373	8439	0.8345	5324	13284	0.4538	2848	6041	0.4881		gi|1836157|gb|AAB46908.1| fungal protease inhibitor F; FPI-F [Bombyx mori] Fungal protease inhibitor F precursor (FPI-F) fungal protease-specific inhibitor-F [Bombyx mori]
sw06796	1160	862	1.2934	880	1172	0.7517	717	987	0.7664	351	1194	0.3484		gi|49903151|gb|AAH76400.1| Unc-45 (C. elegans) related [Danio rerio]
sw06810	701	675	1.198	1669	297	6.3923	274	221		29	530	0.1199		gi|7407187|gb|AAF61949.1| insulin-related peptide binding protein [Spodoptera frugiperda]
sw06827	1023	719	1.5785	600	774	0.8538	1049	547	2.3624	537	839	0.8483		gi|72165852|ref|XP_794895.1| PREDICTED: similar to RIKEN cDNA 5930412E23 [Strongylocentrotus purpuratus]
sw06828	3010	2351	1.1563	3079	1636	1.767	2313	1135	2.5006	2587	2493	1.0087
sw06835	2117	1661	1.1572	2186	2209	1.0097	1415	1682	1.0419	8657	1724	4.0669		gi|66514150|ref|XP_396407.2| PREDICTED: similar to heparan sulfate (glucosamine) 3-O-sulfotransferase 5 [Apis mellifera]
sw06847	1305	1062	1.199	1870	1757	1.1021	369	1000	0.4634	69	1219	0.0999
sw06858	17613	12475	1.2444	28475	22433	1.0902	7203	20349	0.4181	3444	15891	0.2343
sw06862	380	376		462	644	0.9058	167	578	0.4523	959	379	3.572		gi|48734910|gb|AAH71343.1| Adenylosuccinate lyase [Danio rerio]
sw06883	1045	1174	0.8439	576	945	0.6427	1037	713	1.5391	312	1125	0.3871		gi|89114114|gb|ABD61648.1| R3D1 [Drosophila simulans]
sw06901	1420	1248	1.093	1220	1056	1.2121	2250	712	3.0957	755	1519	0.6353		gi|82697199|emb|CAJ44088.1| eukaryotic initiation factor 4 gamma 2 (p97) [Sphaerechinus granularis]
sw06907	2673	2667	0.8423	2579	2524	0.9722	2111	2092	1.1206	10989	1865	6.1582		gi|9624385|gb|AAF90150.1| tetraspanin F139 [Apis mellifera] tetraspanin F139 [Apis mellifera]
sw06916	4769	4960	0.9199	7852	7034	1.2061	8566	9624	0.8967	11949	4095	2.2359
sw06928	1011	747	1.741	946	1121	1.1136	1680	828	2.0618	650	1076	0.7162		gi|37360502|dbj|BAC98229.1| mKIAA1668 protein [Mus musculus]
sw06932	5789	5073	1.083	7909	7659	1.0704	9890	10379	0.9775	13436	4014	2.9181		gi|7548744|gb|AAB28237.2| diazepam binding inhibitor; DBI [Manduca sexta] Acyl-CoA-binding protein homolog (ACBP) (Diazepam-binding inhibitor homolog) (DBI) diazepam binding inhibitor-like peptide
sw06966	808	1115	0.8378	664	748	1.0292	387	457	1.0204	296	848	0.4409
sw06973	536	899	0.723	450	1374	0.4298	267	916	0.3112	111	633	0.3088		gi|73975357|ref|XP_539297.2| PREDICTED: similar to UDP-glucuronosyltransferase 2A1 precursor, microsomal [Canis familiaris]
sw06984	753	772	0.9845	1087	884	1.1824	802	891	0.9423	998	504	2.7794		gi|55244644|gb|EAA05076.2| ENSANGP00000008208 [Anopheles gambiae str. PEST] ENSANGP00000008208 [Anopheles gambiae str. PEST]
sw07008	851	1342	0.6298	666	262	2.5973	84	168		11	848	0.0421		gi|24641927|ref|NP_727758.1| CG32603-PA [Drosophila melanogaster] CG32603-PA [Drosophila melanogaster] RE22786p [Drosophila melanogaster]
sw07012	2777	1240	2.0611	5379	2958	1.6323	14473	1941	11.8549	10020	1282	6.9348		gi|13937893|gb|AAH07054.1| TBC1D7 protein [Homo sapiens] TBC1 domain family, member 7 [Homo sapiens] HSPC239 [Homo sapiens] TBC1 domain family, member 7 [Homo sapiens] TBC1 domain family member 7
sw07014	773	721	1.2218	749	696	1.2812	852	424	2.455	966	988	1.2757		gi|6752409|gb|AAF27715.1| PspA [Streptococcus pneumoniae]
sw07028	4305	1835	2.1098	7036	3818	1.7069	21074	2526	7.033	13425	1615	8.584		gi|87248331|gb|ABD36218.1| alpha-N-acetylgalactosaminidase [Bombyx mori]
sw07050	1091	1833	0.6474	1110	1668	0.7336	878	1742	0.6378	79	2666	0.0509		gi|510500|emb|CAA50796.1| GCR 1 protein [Drosophila melanogaster]
sw07052	534	985	0.5734	357	512	0.7714	310	420	0.9754	233	899	0.3254		gi|5901872|gb|AAD55444.1| BcDNA.GM05306 [Drosophila melanogaster]
sw07055	466	589	0.8873	348	352		1063	456	3.2533	256	328			gi|38511767|gb|AAH61310.1| Hydroxyacyl dehydrogenase, subunit B [Xenopus tropicalis] Hydroxyacyl dehydrogenase, subunit B [Xenopus tropicalis] hydroxyacyl-Coenzyme A dehydrogenase/3-ketoacyl-Coenzyme A thiolase/enoyl-Coenzyme A hydratase (trifunctional protein), beta subunit [Xenopus tropicalis]
sw07057	702	1330	0.6259	1227	1001	1.2462	3296	1018	2.7713	39	495	0.225		gi|24639820|ref|NP_572209.1| CG15786-PA [Drosophila melanogaster] CG15786-PA [Drosophila melanogaster]
sw07068	461	579	0.8391	648	501	1.3684	791	679	1.2972	2534	405	11.068		No hits found
sw07086	1124	3472	0.3727	956	1605	0.6174	77	358		29	3211	0.0123		gi|55237990|gb|EAA43983.2| ENSANGP00000023009 [Anopheles gambiae str. PEST] ENSANGP00000023009 [Anopheles gambiae str. PEST]
sw07087	1827	1762	0.9249	1791	1849	0.9499	1680	2908	0.6347	2153	1039	2.266
sw07091	1634	1856	0.7796	972	1379	0.678	526	1492	0.4047	2397	982	2.8098		gi|54289250|gb|AAV31915.1| glutamine synthetase [Aedes aegypti]
sw07093	1435	658	2.1072	2007	1695	1.1935	3083	1331	2.2755	1995	1062	1.9237		No hits found
sw07096	3751	2528	1.1975	4723	4212	0.9363	4250	4101	1.1121	377	2401	0.1889		No hits found
sw07103	858	673	1.1939	665	645	1.0624	564	836	0.7905	808	437	2.4213		gi|28381027|gb|AAO41480.1| AT31792p [Drosophila melanogaster]
sw07108	1082	1080	1.2055	1190	1645	0.9086	1278	2010	0.5778	5192	1164	3.8243		gi|62858811|ref|NP_001016963.1| dihydrolipoamide branched chain transacylase E2 [Xenopus tropicalis] Dihydrolipoyllysine-residue Dihydrolipoamide branched chain transacylase (BCKAD E2) [Xenopus tropicalis]
sw07158	28296	25377	0.8194	29335	26396	0.9525	21612	12984	2.0315	23806	24323	0.7517		gi|28557619|gb|AAO45215.1| RE25996p [Drosophila melanogaster]
sw07211	850	934	0.9588	925	3269	0.2527	343	348		208	556	0.5949
sw07236	1274	1397	0.877	1423	1517	0.8842	916	658	1.5535	8008	1423	9.0739		gi|10383772|ref|NP_009911.2| Beta-isopropylmalate dehydrogenase, catalyzes the third step in the leucine biosynthesis pathway; Leu2p [Saccharomyces cerevisiae] 3-isopropylmalate dehydrogenase; Leu2p [Cloning vector YDp-L] beta-isopropyl-malate dehydrogenase [Saccharomyces cerevisiae] 3-isopropylmalate dehydrogenase (Beta-IPM dehydrogenase) (IMDH) (3-IPM-DH)
sw07252	1421	1384	0.9469	1339	1390	0.9163	972	763	1.3884	8321	1457	8.3172		gi|41016738|dbj|BAD07480.1| putative transposase yabusame-W [Bombyx mori]
sw07261	925	1892	0.5564	6749	5299	1.138	3042	4118	0.806	2527	12432	0.2241		gi|56121876|ref|YP_145791.1| polyprotein [Varroa destructor virus 1] polyprotein [Varroa destructor virus 1]
sw07281	1839	2233	0.7695	2194	1645	1.332	2078	2171	1.0337	263	1758	0.2423		gi|18447174|gb|AAL68178.1| AT31946p [Drosophila melanogaster]
sw07298	197	335		267	484	0.947	355	782	0.4746	1152	183	7.1562
sw07307	1355	1336	1.1942	1203	1722	0.9412	1058	1808	0.6225	4165	1587	2.2289
sw07310	1716	2001	0.9735	1588	2614	0.7846	1675	2687	0.6429	215	1731	0.1815
sw07317	932	1263	0.8737	763	1255	0.7931	1275	2071	0.5967	3129	1012	3.157
sw07320	823	1229	0.7671	718	766	1.1649	1685	769	2.1052	135	1017	0.1818
sw07324	2874	2354	1.2842	4550	3831	1.2941	5366	4924	1.0885	7620	2136	3.3352		gi|87248573|gb|ABD36339.1| phosphoserine aminotransferase [Bombyx mori]
sw07326	521	654	1.0281	667	713	1.242	670	934	0.8687	1384	507	3.655		gi|83286866|sp|Q60534|CF105_MESAU Protein C6orf105 homolog (Androgen-dependent expressed protein FAR-17a) androgen-dependent expressed protein
sw07356	1869	1572	1.1727	3351	3099	1.0006	3087	2461	1.1508	2458	1029	2.4584		gi|55236409|gb|EAL39294.1| ENSANGP00000025683 [Anopheles gambiae str. PEST] ENSANGP00000025683 [Anopheles gambiae str. PEST]
sw07358	3041	3080	0.9688	3698	2774	1.3593	3908	1976	2.4723	2633	2790	0.905		gi|66505117|ref|XP_392246.2| PREDICTED: similar to ENSANGP00000014902 [Apis mellifera]
sw07399	4883	5941	0.725	7333	4724	1.5577	2227	3724	0.6831	282	6596	0.0587
sw07418	4875	4596	1.0505	7062	5878	1.2151	3901	5667	0.7764	320	4016	0.0966		gi|67460592|sp|Q9TV64|AK1D1_RABIT 3-oxo-5-beta-steroid 4-dehydrogenase (Delta(4)-3-ketosteroid 5-beta-reductase) (Aldo-keto reductase family 1 member D1) delta4-3-oxosteroid 5beta-reductase [Oryctolagus cuniculus]
sw07423	787	797	1.0341	746	772	1.0856	259	458	0.836	300	955	0.4329		gi|68363310|ref|XP_687652.1| PREDICTED: similar to bile acid beta-glucosidase [Danio rerio]
sw07431	8500	8220	0.8337	11058	4365	2.4889	7690	5042	1.9568	498	6611	0.0593		gi|68368940|ref|XP_692886.1| PREDICTED: similar to Protein kinase C binding protein 1 [Danio rerio]
sw07443	477	516	0.9722	444	521	0.9929	297	418	0.9516	1348	667	2.415
sw07487	2414	3454	0.5878	1696	3518	0.4312	1962	2721	0.798	2243	1653	1.4622		gi|15418960|gb|AAK83467.1| ER-localized type I transmembrane adaptor precursor [Homo sapiens]
sw07530	2139	1315	1.6496	1963	3128	0.7051	786	1076	0.8255	10120	1052	8.5154
sw07534	8151	4119	1.8096	6784	6616	0.9748	4220	4080	1.0261	946	7124	0.1472		gi|67475506|ref|XP_653447.1| Viral A-type inclusion protein repeat [Entamoeba histolytica HM-1:IMSS] Viral A-type inclusion protein repeat, putative [Entamoeba histolytica HM-1:IMSS]
sw07538	808	896	1.0617	1027	1131	0.9979	1118	674	2.0675	632	893	0.8214		No hits found
sw07543	382	878	0.4642	306	471	0.8891	244	375		91	366
sw07544	1943	1563	1.2249	3025	2893	0.9781	2338	2901	0.7471	4037	1473	2.6717		gi|31324444|gb|AAP47228.1| Sec61p gamma subunit [Gryllotalpa orientalis] Protein transport protein SEC61 gamma subunit
sw07559	86	164		113	185		2187	220	8.3382	60	178			gi|48097950|ref|XP_393932.1| PREDICTED: similar to molting fluid carboxypeptidase A [Apis mellifera]
sw07563	4033	2893	1.1684	5295	4492	1.0959	6397	4514	1.3557	10740	2504	4.0228		gi|88913546|sp|Q6AWN0|MTND_DROME 1,2-dihydroxy-3-keto-5-methylthiopentene dioxygenase (Aci-reductone dioxygenase) (ARD)
sw07568	467	353	1.515	792	463	1.713	875	588	1.5696	2908	501	7.9645
sw07589	1519	1397	1.1835	1891	1601	1.2541	1431	1121	1.4025	562	1998	0.3037		gi|68436853|ref|XP_697750.1| PREDICTED: similar to leucine zipper, putative tumor suppressor 1 [Danio rerio]
sw07607	6080	4967	0.9971	8170	4952	1.6208	3987	5873	0.7881	111	5614	0.0268		gi|73995174|ref|XP_853422.1| PREDICTED: similar to 4-hydroxyphenylpyruvate dioxygenase (4HPPD) (HPD) (HPPDase) [Canis familiaris]
sw07609	250	336		576	684	1.0268	1145	789	1.5934	2141	443	7.4849		gi|87248539|gb|ABD36322.1| Mo-molybdopterin cofactor sulfurase [Bombyx mori]
sw07617	1007	16335	0.0657	134	244		78	4232	0.0184	49	3089	0.0391
sw07618	113	817	0.1836	34	165		15	284		14	305			gi|72164196|ref|XP_788852.1| PREDICTED: similar to transposable element tcb1 transposase (2C227) [Strongylocentrotus purpuratus]
sw07625	1033	625	1.8499	1820	1009	2.0054	2915	802	4.4379	1467	935	1.6698		gi|68303294|gb|AAY89587.1| E75 nuclear receptor [Gecarcinus lateralis]
sw07651	5326	4841	0.862	7351	7011	0.9376	3931	4353	0.9798	2548	6352	0.383		gi|2738863|gb|AAB94557.1| hemocyte protease-1 [Manduca sexta]
sw07670	1961	1434	1.4147	3500	2144	1.5084	2493	547	4.8049	3420	1990	1.9245
sw07674	4995	10666	0.4649	4625	10094	0.4387	4543	4878	0.9958	4288	5259	0.8516		gi|9731|emb|CAA46187.1| vacuolar ATPase 16 kD proteolipid subunit [Manduca sexta] Vacuolar ATP synthase 16 kDa proteolipid subunit
sw07685	862	1296	0.799	1514	2758	0.7019	1378	1028	1.4265	15000	1086	13.7727		gi|5851|emb|CAA41351.1| Chorion protein [Bombyx mori] Chorion class CA protein ERA.2 precursor
sw07686	802	1082	0.9082	1433	2492	0.7471	1195	778	1.5476	16262	1001	12.6061		gi|82930276|ref|XP_897610.1| PREDICTED: similar to Gastric cancer antigen Zg14 homolog isoform 1 [Mus musculus] PREDICTED: similar to Gastric cancer antigen Zg14 homolog isoform 1 [Mus musculus]
sw07691	290	1556	0.2721	201	1580	0.2092	191	408	0.6464	118	445	0.5148		gi|55238393|gb|EAA44050.2| ENSANGP00000024376 [Anopheles gambiae str. PEST] ENSANGP00000024376 [Anopheles gambiae str. PEST]
sw07692	3022	3905	0.7663	2770	3633	0.8725	3167	3353	0.908	1595	3554	0.4448		gi|76647278|ref|XP_884232.1| PREDICTED: similar to c-src tyrosine kinase isoform 5 [Bos taurus]
sw07693	742	910	0.9853	300	529	0.9344	705	1534	0.4637	52	311			gi|32997078|dbj|BAC79385.1| transcription factor BmEts [Bombyx mori]
sw07709	283	356		147	359		445	239	2.2107	2601	613	4.5281
sw07734	6040	6540	0.8188	7343	5260	1.3648	12536	4596	3.6686	3900	5808	0.6048		gi|55239870|gb|EAA10114.2| ENSANGP00000014351 [Anopheles gambiae str. PEST] ENSANGP00000014351 [Anopheles gambiae str. PEST]
sw07738	524	527	1.2519	875	968	1.0117	840	408	2.8022	1928	777	2.6884
sw07744	2625	2511	0.9773	6854	6929	0.8469	5795	6229	0.8574	4910	8231	0.4475		gi|38649324|gb|AAH63180.1| WD repeat domain 12 [Rattus norvegicus] WD repeat domain 12 [Rattus norvegicus] WD-repeat protein 12
sw07752	1790	1895	0.8536	2074	1626	1.1441	3579	3442	0.9778	289	1166	0.2966		gi|66523258|ref|XP_624505.1| PREDICTED: similar to Zgc:92132, partial [Apis mellifera]
sw07753	457	657	0.8382	911	869	1.1971	678	991	0.6876	2454	776	3.4836		gi|28317039|gb|AAO39539.1| RE09158p [Drosophila melanogaster]
sw07761	1222	990	1.2645	1119	1207	1.0381	1374	1272	1.0856	248	1237	0.2447		gi|72088968|ref|XP_784756.1| PREDICTED: similar to B(0,+)-type amino acid transporter 1 (B(0,+)AT) (Glycoprotein-associated amino acid transporter b0,+AT1) [Strongylocentrotus purpuratus]
sw07767	2696	2618	0.8966	3133	2205	1.297	3497	1901	2.1188	1209	1947	0.7161		gi|55240766|gb|EAA09276.2| ENSANGP00000013071 [Anopheles gambiae str. PEST] ENSANGP00000013071 [Anopheles gambiae str. PEST]
sw07781	253	188		362	995	0.4447	218	385		35	524	0.1198
sw07782	245	242		454	1377	0.3353	196	421	0.6444	53	755	0.1522		gi|60677707|gb|AAX33360.1| SD03462p [Drosophila melanogaster]
sw07794	48988	25476	1.6803	84718	55865	1.2923	53360	53139	1.0111	3113	57671	0.043
sw07800	293	268		310	310		670	263	2.7567	1076	312	5.5641		gi|73983396|ref|XP_540905.2| PREDICTED: similar to alpha glucosidase II alpha subunit isoform 3 isoform 1 [Canis familiaris]
sw07820	772	1156	0.679	613	683	0.9418	240	361		324	1043	0.3811		gi|71896095|ref|NP_001026748.1| pleiomorphic adenoma gene 1 [Gallus gallus] pleiomorphic adenoma gene 1 [Gallus gallus]
sw07845	152	327		231	319		186	265		866	312	3.3367		gi|66521780|ref|XP_393857.2| PREDICTED: similar to ENSANGP00000010267 [Apis mellifera]
sw07846	119	302		249	252		120	162		815	250	3.7206
sw07851	1653	2089	0.7159	2280	1524	1.4857	405	680	0.7042	277	1786	0.2118
sw07855	5967	8151	0.5631	1847	2806	0.6276	7146	1195	5.5887	176	13988	0.0153		gi|89112795|gb|ABD60991.1| C-type lectin [Glossina morsitans morsitans]
sw07856	554	401	1.4475	423	459	0.9584	444	317	1.7078	1273	410	4.1484		gi|26454107|dbj|BAC44437.1| DNA topoisomerase IV subunit A [Mycoplasma penetrans HF-2] DNA topoisomerase IV subunit A [Mycoplasma penetrans HF-2]
sw07859	1134	969	1.0648	1420	1295	1.0832	1675	1217	1.551	1698	510	4.2102		gi|85740625|gb|ABC79690.1| glutathione S-transferase 3 [Bombyx mori]
sw07860	851	587	1.4255	587	699	0.8195	1035	1012	1.1096	4098	409	10.874		gi|55235242|gb|EAA14814.3| ENSANGP00000021422 [Anopheles gambiae str. PEST] ENSANGP00000021422 [Anopheles gambiae str. PEST]
sw07863	4232	4722	0.7087	3893	3508	1.0399	4931	4353	1.2347	1358	2895	0.4727		gi|66508517|ref|XP_624862.1| PREDICTED: similar to F-actin capping protein alpha subunit [Apis mellifera]
sw07873	1575	1885	0.9349	1921	2148	1.0693	3532	1903	1.8668	6923	1196	6.1066		gi|12644116|sp|P11046|LAMB1_DROME Laminin beta-1 chain precursor (Laminin B1 chain)
sw07877	1120	1415	0.9143	1082	1118	1.2337	1867	982	2.0392	1578	1024	1.8341		gi|83423461|dbj|BAE54254.1| transitional endoplasmic reticulum ATPase TER94 [Bombyx mori]
sw07878	1125	1456	0.9141	638	777	1.1748	2020	788	2.5994	1812	953	1.968
sw07883	116	402	0.5355	147	478	0.6158	86	261		861	162	6.9898		gi|28077083|ref|NP_291081.2| amnionless [Mus musculus] amnionless precursor protein [Mus musculus] amnionless precursor protein [Mus musculus] Amnionless [Mus musculus] Amnionless protein precursor
sw07901	286	334		623	702	1.21	691	1402	0.4818	72	312			gi|50760089|ref|XP_417895.1| PREDICTED: similar to CDNA sequence BC021608 [Gallus gallus]
sw07919	1549	1815	0.8594	1566	2243	0.7791	1713	1667	1.0936	4779	1760	2.5609		gi|25012709|gb|AAN71448.1| RE59077p [Drosophila melanogaster]
sw07925	8639	6739	1.1687	12655	11596	1.0358	13871	11512	1.1916	18598	5091	2.6716		gi|87248409|gb|ABD36257.1| signal peptidase complex subunit 2 [Bombyx mori]
sw07934	859	998	1.0006	507	431	1.5303	1602	955	2.0418	59	424	0.2844		gi|28317050|gb|AAO39544.1| RE06501p [Drosophila melanogaster]
sw07941	1290	1128	1.1744	1518	1102	1.4777	1362	1155	1.1611	178	1520	0.1496		gi|45551111|ref|NP_725647.2| fat-spondin CG6953-PB, isoform B [Drosophila melanogaster] CG6953-PB, isoform B [Drosophila melanogaster]
sw07942	1447	1298	1.1375	1180	900	1.3999	1026	887	1.2769	180	1506	0.1618		gi|66558734|ref|XP_624955.1| PREDICTED: similar to ENSANGP00000009263 [Apis mellifera]
sw07943	935	781	1.1881	1119	893	1.3619	712	821	1.0125	1693	646	3.1004		gi|50803976|ref|XP_424294.1| PREDICTED: similar to chromosome 1 open reading frame 9; membrane protein CH1, partial [Gallus gallus]
sw07948	3190	3291	0.8261	3930	2745	1.2262	5069	2914	1.6131	5181	1771	2.9926		gi|55238216|gb|EAA11908.2| ENSANGP00000014225 [Anopheles gambiae str. PEST] ENSANGP00000014225 [Anopheles gambiae str. PEST]
sw07956	5484	5569	0.7961	8153	8805	0.813	6946	5907	1.2118	12100	3980	2.4562		gi|1019386|emb|CAA57525.1| oligosaccharyltransferase subunit [Drosophila melanogaster]
sw07985	3624	2661	1.451	8667	8699	1.0002	6242	10409	0.658	22028	1604	16.3955		gi|72156944|ref|XP_794386.1| PREDICTED: similar to Lambda-crystallin homolog [Strongylocentrotus purpuratus]
sw07995	18697	19465	0.6979	25833	28214	0.8121	24713	7381	4.4165	15983	28957	0.3798
sw08025	661	854	0.9135	1087	974	1.1572	719	644	1.157	1805	770	2.4921		gi|833753|gb|AAB46366.1| apterous homeodomain protein
sw08029	683	1410	0.5783	1712	903	1.796	538	575	1.0169	1907	769	2.6164		gi|34921426|sp|O96790|DPGN_DIPMA Serine protease inhibitor dipetalogastin precursor (Dipetalin)
sw08031	623	1099	0.5095	286	446	0.8096	213	464	0.6295	261	882	0.4101		gi|27820023|gb|AAO25043.1| GM10395p [Drosophila melanogaster]
sw08040	1745	1237	1.2424	1857	1398	1.2068	1966	916	2.2346	973	1088	1.0218
sw08044	5561	5669	0.749	6415	10449	0.4683	4204	9609	0.4598	519	6277	0.0728
sw08049	416	699	0.6461	442	683	0.7618	426	878	0.6266	88	879	0.2054		gi|68378933|ref|XP_689055.1| PREDICTED: similar to cDNA sequence BC021395 [Danio rerio]
sw08052	977	718	1.3039	1769	1460	1.0615	1326	1200	1.19	2067	993	2.2154		gi|73962089|ref|XP_547678.2| PREDICTED: similar to metallophosphoesterase 1 isoform a precursor isoform 1 [Canis familiaris]
sw08062	553	563	1.1723	384	414	1.0848	2763	488	5.9616	51	651	0.1535		gi|87248331|gb|ABD36218.1| alpha-N-acetylgalactosaminidase [Bombyx mori]
sw08068	3343	2808	1.2426	3218	2124	1.7768	4348	2190	2.0254	331	3583	0.1145		gi|5052548|gb|AAD38604.1| BcDNA.GH05582 [Drosophila melanogaster]
sw08073	1717	2169	0.883	1823	2385	0.9321	3377	2846	1.1502	2925	1502	2.1864		gi|55241015|gb|EAA08806.2| ENSANGP00000010984 [Anopheles gambiae str. PEST] ENSANGP00000010984 [Anopheles gambiae str. PEST]
sw08074	1396	1335	1.22	1886	3010	0.7992	2975	2305	1.3441	12769	614	16.4194		gi|59709575|gb|AAW88441.1| prothrombin activator [Lonomia obliqua]
sw08076	2806	3231	0.8848	4732	3587	1.4909	3292	4226	0.7427	139	6298	0.0311		gi|9186884|dbj|BAA99543.1| BCS-1 [Balanus amphitrite]
sw08094	2376	2485	0.9991	1988	1871	1.207	2629	1733	1.8229	879	3134	0.3302		gi|62657972|ref|XP_213611.3| PREDICTED: similar to Myosin, light polypeptide kinase, telokin isoform [Rattus norvegicus]
sw08106	6481	10307	0.6391	5289	3218	1.5375	876	1492	0.6363	120	14991	0.011		gi|829163|emb|CAA48756.1| pupal cuticle protein [Bombyx mori] Pupal cuticle protein precursor pupal cuticle protein
sw08108	976	740	1.536	2521	1023	3.0434	2650	1774	1.4416	5137	814	10.0271		gi|76156035|gb|ABA39861.1| uricase [Bombyx mori]
sw08124	2255	2694	0.7851	2767	2987	0.8788	3379	3864	0.8102	718	1945	0.3489		gi|21355279|ref|NP_651181.1| CG10219-PA [Drosophila melanogaster] RE66546p [Drosophila melanogaster] RE42847p [Drosophila melanogaster] CG10219-PA [Drosophila melanogaster] Putative succinate dehydrogenase [ubiquinone] cytochrome b small subunit, mitochondrial precursor (CybS) (Succinate-ubiquinone reductase membrane anchor subunit)
sw08145	3102	3915	0.7217	4194	2511	1.7728	3968	3282	1.2354	62	3199	0.0257		gi|87248377|gb|ABD36241.1| notch-like protein [Bombyx mori]
sw08146	696	773	1.0249	1021	1165	0.9558	717	774	1.1095	1187	759	2.0794		gi|6094494|sp|O16140|TOP2_BOMMO DNA topoisomerase 2 (DNA topoisomerase II) (TOPOII) topoisomerase II [Bombyx mori]
sw08156	545	577	1.0317	922	957	0.9457	912	912	1.0597	4612	456	9.9519		gi|40215525|gb|AAL48097.2| RE72980p [Drosophila melanogaster]
sw08162	2272	1719	1.3509	2797	2561	1.12	2317	2114	1.232	12189	2853	3.9817
sw08171	4992	4905	0.9254	3790	2548	1.5523	3562	3293	1.2826	131	3810	0.0532		gi|22779450|dbj|BAC15605.1| masquerade-like serine proteinase homologue [Tenebrio molitor]
sw08173	2457	209	13.844	32	156		1062	209	7.1332	56	153
sw08189	1187	1518	0.9119	1814	1486	1.4334	1949	1470	1.4321	2461	1173	2.6297		gi|29570461|gb|AAB52680.3| Cell death abnormality protein 6 [Caenorhabditis elegans] CEll Death abnormality family member (ced-6) [Caenorhabditis elegans] candidate adaptor protein CED-6 [Caenorhabditis elegans]
sw08192	962	685	1.4657	1559	1255	1.2223	1018	1322	0.8772	158	991	0.2536
sw08198	12774	13177	0.8522	20765	20160	0.8903	19518	13313	1.4494	33854	5614	5.5163		gi|3426021|dbj|BAA32395.1| heat shock 70 kD protein cognate [Bombyx mori]
sw08241	902	814	1.1137	1192	1299	0.9679	1383	1083	1.3849	3906	744	4.5948		gi|74003530|ref|XP_545236.2| PREDICTED: similar to lipase, member H precursor [Canis familiaris]
sw08270	5141	4043	1.2917	4050	2849	1.7402	2269	1695	1.3785	8781	3318	2.2988		gi|7407187|gb|AAF61949.1| insulin-related peptide binding protein [Spodoptera frugiperda]
sw08292	1468	1648	0.8916	1908	2241	0.8989	2019	2995	0.6215	6930	1415	6.8126		gi|7021284|gb|AAF35280.1| branched chain alpha-keto acid dehydrogenase E2 subunit [Arabidopsis thaliana]
sw08293	2622	2259	1.2203	2770	4121	0.7785	2833	5796	0.4403	16347	1573	6.598
sw08321	1884	1569	1.1734	2302	2172	1.1267	1909	1669	1.1355	1206	2600	0.4837		gi|10179836|gb|AAG13903.1| iron inhibited ABC transporter 1 [Homo sapiens] iron inhibited ABC transporter 2 [Homo sapiens]
sw08326	9620	5390	1.4712	17137	11278	1.2488	9943	9626	1.0422	674	10282	0.0625
sw08328	4002	1434	2.3924	10668	4232	1.9865	19796	6092	3.081	482	882	0.6875
sw08348	750	946	0.8103	882	843	1.0306	566	780	0.78	360	1058	0.4084		gi|3893103|emb|CAA76939.1| Pollux protein [Drosophila melanogaster]
sw08350	13342	8530	1.3289	15565	13895	1.0622	10789	9345	1.4261	2460	14220	0.1458		gi|27819912|gb|AAM49940.2| LD42676p [Drosophila melanogaster]
sw08373	1388	1125	1.4351	2314	2170	1.2003	2244	1691	1.436	2370	1253	2.3406		gi|66515353|ref|XP_395733.2| PREDICTED: hypothetical protein XP_395733 [Apis mellifera]
sw08383	2761	2683	0.9015	3540	3734	0.9353	3964	4445	1.0657	5279	1471	3.0887		gi|76630224|ref|XP_879975.1| PREDICTED: similar to Protein disulfide-isomerase A6 precursor (Thioredoxin domain containing protein 7) isoform 7 [Bos taurus]
sw08388	5886	3491	1.391	5815	5470	0.9164	3902	4990	0.872	594	8157	0.0534		gi|57912979|ref|XP_554332.1| ENSANGP00000029079 [Anopheles gambiae str. PEST] ENSANGP00000029079 [Anopheles gambiae str. PEST]
sw08406	294	423	0.9112	209	357		163	252		907	282	4.1915		gi|5052592|gb|AAD38626.1| BcDNA.GH08773 [Drosophila melanogaster]
sw08417	728	692	1.1261	994	1261	0.8401	252	888	0.3673	30	711	0.1074		gi|25012317|gb|AAN71270.1| LP05231p [Drosophila melanogaster]
sw08427	5641	3191	1.3782	5897	1864	3.1014	4025	1230	3.1729	205	3222	0.0857
sw08430	293	400	0.9295	217	295		174	200		1368	384	3.8448		gi|55244525|gb|EAA05397.3| ENSANGP00000019756 [Anopheles gambiae str. PEST] ENSANGP00000019756 [Anopheles gambiae str. PEST]
sw08442	1176	1463	0.8838	868	867	1.0488	371	550	0.7838	97	2220	0.0672		gi|13359096|dbj|BAB33297.1| Esterase-like protein (ESR-LP) [Bombyx mori]
sw08444	21668	13572	1.0205	28692	12932	1.567	18027	7137	2.7589	2204	17567	0.103		gi|10959|emb|CAA41557.1| paramyosin [Drosophila melanogaster]
sw08446	3738	3591	1.0278	5302	3552	1.357	8328	4637	1.9397	8131	3326	2.4886		gi|4090874|gb|AAD09286.1| putative lectin [Hyphantria cunea]
sw08456	2199	1875	1.2956	2003	3332	0.6987	1906	3286	0.5276	6335	1715	3.083		gi|58396548|ref|XP_321974.2| ENSANGP00000012099 [Anopheles gambiae str. PEST] ENSANGP00000012099 [Anopheles gambiae str. PEST]
sw08457	1607	3208	0.5803	440	3034	0.2389	357	1090	0.3486	472	2427	0.2574		gi|4090964|gb|AAD09279.1| immune-related Hdd1 [Hyphantria cunea]
sw08471	449	417	1.5031	666	753	1.1745	774	838	1.0363	2695	618	4.4718		gi|66523500|ref|XP_394029.2| PREDICTED: similar to Aminomethyltransferase, mitochondrial precursor (Glycine cleavage system T protein) (GCVT) [Apis mellifera]
sw08474	486	574	1.1215	428	457	1.3919	2207	521	5.8056	235	894	0.4037		gi|48098816|ref|XP_392559.1| PREDICTED: similar to serine proteinase [Apis mellifera]
sw08480	32416	18751	1.4134	38746	19967	1.9967	32380	23882	1.4285	1125	36901	0.0267		gi|6706437|emb|CAB66004.1| Gly-rich protein [Drosophila melanogaster]
sw08485	83	168		100	196		875	283	3.6088	150	231			gi|29467722|dbj|BAC67246.1| chitinase [Bombyx mori]
sw08487	11998	8433	1.1192	16260	13264	1.2029	12049	9941	1.2216	1736	14210	0.092		gi|66500404|ref|XP_623509.1| PREDICTED: similar to putative tropomyosin [Apis mellifera]
sw08530	547	638	1.0117	1000	2944	0.3594	136	263		257	876	0.3763		gi|72049105|ref|XP_795008.1| PREDICTED: similar to Iroquois-class homeodomain protein IRX-4 (Iroquois homeobox protein 4) (Homeodomain protein IRXA3) [Strongylocentrotus purpuratus]
sw08544	1518	1370	1.0896	3157	3129	0.9329	1226	1414	0.9093	300	2481	0.1368		gi|82796372|gb|ABB91778.1| cathepsin L [Hymeniacidon perlevis]
sw08546	10391	9991	0.8936	14980	8482	1.8151	3764	5490	0.782	288	12785	0.03
sw08547	483	977	0.5057	252	445	0.7352	61	296		34	872	0.0938
sw08563	313	451	0.8503	231	453	0.6632	175	303		1006	577	2.0357
sw08564	635	825	0.803	423	310	1.6245	123	228		52	1028	0.0942		gi|55243079|gb|EAL41130.1| ENSANGP00000029194 [Anopheles gambiae str. PEST] ENSANGP00000029194 [Anopheles gambiae str. PEST]
sw08565	6404	5393	1.1771	8824	7466	1.225	8258	6335	1.4649	974	4787	0.1911
sw08572	311	1061	0.3091	137	305		910	475	1.9844	66	343
sw08576	22181	17815	0.8349	21200	20522	0.8588	6588	19235	0.4695	553	26704	0.017
sw08594	294	295		419	530	0.9496	362	366		1293	347	4.5075		gi|81248546|gb|ABB69054.1| cytochrome P450 [Helicoverpa armigera]
sw08597	50	264		1036	973	1.1136	1511	444	2.9312	15	97			gi|66513293|ref|XP_623940.1| PREDICTED: similar to peroxidase [Apis mellifera]
sw08612	558	497	1.162	1220	764	1.5703	685	663	1.1119	1439	487	3.7879		gi|19886577|gb|AAM01469.1| Phosphoenolpyruvate synthase/pyruvate phosphate dikinase [Methanopyrus kandleri AV19] phosphoenolpyruvate synthase [Methanopyrus kandleri AV19]
sw08614	1248	1262	1.0502	587	894	0.713	523	717	0.7782	94	1445	0.0818		gi|24666583|ref|NP_649084.1| CG18136-PA [Drosophila melanogaster] CG18136-PA [Drosophila melanogaster]
sw08616	1390	1214	1.0248	2431	2319	0.9049	1805	2229	0.8228	5433	1181	4.6415		gi|62858803|ref|NP_001016289.1| glutaryl-Coenzyme A dehydrogenase [Xenopus tropicalis] glutaryl-Coenzyme A dehydrogenase [Xenopus tropicalis] glutaryl-Coenzyme A dehydrogenase [Xenopus tropicalis]
sw08623	3881	2516	1.2639	3673	3449	1.0029	3077	3099	1.0581	10293	2209	4.1		gi|33320664|gb|AAQ05970.1| peroxidasin [Aedes aegypti]
sw08626	1627	1667	1.0362	1673	1805	0.9063	445	1820	0.2643	1256	1588	0.9665		gi|2827498|emb|CAA15707.1| EG:30B8.3 [Drosophila melanogaster]
sw08642	275	396		192	380		164	340		163	2232	0.1118
sw08652	599	659	1.2135	1335	1252	1.3608	1496	1386	1.0279	1976	613	3.2073		gi|73991665|ref|XP_863767.1| PREDICTED: similar to itchy homolog E3 ubiquitin protein ligase isoform 13 [Canis familiaris]
sw08657	6208	6003	0.9942	6372	6315	1.1435	4751	6435	0.7855	673	9346	0.077		gi|24762312|gb|AAL38051.2| chitin synthase [Manduca sexta]
sw08660	1262	1720	0.7989	1210	1680	0.8038	1462	2288	0.6274	485	1369	0.4145
sw08667	6525	5024	1.2629	16177	10255	1.5917	25892	14068	1.8636	49473	2733	13.5944		gi|31419487|gb|AAH53204.1| Beta-ureidopropionase [Danio rerio] beta-ureidopropionase [Danio rerio]
sw08669	544	620	1.1659	541	977	0.7585	655	832	0.7905	1393	458	3.6724		gi|72046825|ref|XP_781184.1| PREDICTED: similar to visual system homeobox 2 protein [Strongylocentrotus purpuratus]
sw08678	755	882	1.024	924	945	1.1725	921	827	1.307	2329	619	3.9708		gi|60552131|gb|AAH91271.1| Nicotinamide nucleotide transhydrogenase [Rattus norvegicus] nicotinamide nucleotide transhydrogenase [Rattus norvegicus]
sw08684	13306	10984	0.9498	16326	17180	0.8099	11672	9992	1.0285	43496	4027	12.7543		gi|73989527|ref|XP_534182.2| PREDICTED: similar to Collagen alpha 1(IV) chain precursor [Canis familiaris]
sw08702	316	406	1.0281	359	586	0.7588	250	856	0.2737	29	382			gi|5052592|gb|AAD38626.1| BcDNA.GH08773 [Drosophila melanogaster]
sw08708	1241	1784	0.6471	1741	1729	0.9268	1705	2181	0.7494	586	1421	0.4655		gi|20451731|emb|CAD12369.1| senecionine N-oxygenase [Tyria jacobaeae]
sw08717	29	74		6	125		18	111		1006	127	11.4361		gi|72009033|ref|XP_780140.1| PREDICTED: similar to hemicentin 1 [Strongylocentrotus purpuratus]
sw08718	41506	31691	0.9443	51217	51242	0.7688	22017	57057	0.3885	6297	51269	0.0775		gi|2209362|gb|AAB61471.1| larval cuticular protein 1 [Helicoverpa armigera] Larval cuticle protein 1 precursor
sw08745	1091	1724	0.6971	1018	1330	0.8479	570	815	0.7596	419	1280	0.3838		gi|24651106|ref|NP_733300.1| CG15506-PB, isoform B [Drosophila melanogaster] CG15506-PB, isoform B [Drosophila melanogaster]
sw08767	1030	1161	0.8832	1203	1297	0.9879	852	1293	0.8161	1723	835	2.0749		gi|6466460|gb|AAD29307.2| Hsp90-related protein TRAP1 [Drosophila melanogaster]
sw08783	4046	2839	1.2567	5777	5556	0.9598	5631	5832	1.1846	20095	1921	10.8611		gi|457733|emb|CAA82998.1| torso like [Drosophila melanogaster] torso-like protein
sw08784	3238	2115	1.3395	6165	4289	1.2952	4201	4002	1.1414	10804	2146	7.5784		gi|2282473|dbj|BAA21640.1| xanthine dehydrogenase [Bombyx mori]
sw08791	15639	7680	1.5637	14599	9963	1.2995	14359	8503	2.0378	11289	9664	1.015		gi|25992174|gb|AAN77090.1| masquerade-like serine proteinase homolog [Bombyx mori]
sw08802	2547	2696	0.9549	2152	2155	1.0214	1609	1191	1.3137	650	2109	0.3232		gi|2384715|gb|AAB69858.1| IE-2 protein [Human herpesvirus 6] IE2hom [Human herpesvirus 6 (strain Uganda-1102)]
sw08811	2825	1629	1.4713	2299	2265	0.981	1870	911	2.0715	1848	1707	1.1612
sw08815	286	410	0.8023	353	533	0.7477	633	644	1.0954	1534	313	6.2022		gi|3207186|gb|AAC21661.1| cytochrome P450 [Manduca sexta]
sw08818	4481	4588	0.9531	4978	5178	0.8916	3234	3620	0.9426	2822	7343	0.4076		gi|52345686|ref|NP_001004890.1| MGC88935 protein [Xenopus tropicalis] MGC88935 protein [Xenopus tropicalis]
sw08830	3358	3004	1.1103	3357	1805	1.7125	1404	1667	0.8781	120	2503	0.0709
sw08833	656	839	0.9641	636	775	1.1486	629	963	0.7013	1024	478	2.7913
sw08844	796	1134	0.8388	818	2829	0.3551	926	1497	0.5688	2391	2515	0.8963		gi|6016491|sp|P55796|LEB3_BOMMO Lebocin-3 precursor (LEB 3) lebocin 3 [Bombyx mori]
sw08853	1027	1037	1.1953	1219	1495	1.0092	1011	1608	0.613	463	1679	0.3419		gi|87248481|gb|ABD36293.1| cytochrome b5 [Bombyx mori]
sw08870	540	482	1.4112	724	779	1.1617	659	448	1.8912	1846	759	2.6253		gi|28316894|gb|AAO39469.1| RH04286p [Drosophila melanogaster]
sw08871	11988	6958	1.3643	15948	14938	1.0527	13380	16088	0.8558	46481	3191	12.3309		gi|6625564|gb|AAF19267.1| hemolymph juvenile hormone binding protein precursor [Bombyx mori]
sw08905	4797	7139	0.6005	6616	7513	0.8757	5485	6758	0.812	939	6922	0.1318
sw08911	226	2494	0.0614	20	110		22	481	0.1809	25	907	0.0504		No hits found
sw08916	393	203		3614	792	3.9376	19131	3900	5.0979	44	206
sw08972	342	375		748	809	0.944	428	348	1.5312	912	385	4.2847
sw08976	1065	1030	1.0156	986	670	1.5833	805	426	2.1384	950	980	1.3388
sw08980	821	790	1.0252	955	1148	0.8102	508	1169	0.4956	2318	682	5.3532		No hits found
sw09000	979	959	0.9552	1332	1420	0.8316	505	1476	0.3401	412	966	0.5319		gi|58699127|ref|ZP_00373955.1| Putative ankyrin-repeat protein, putative [Wolbachia endosymbiont of Drosophila ananassae] Putative ankyrin-repeat protein, putative [Wolbachia endosymbiont of Drosophila ananassae]
sw09022	716	772	1.0721	1124	1148	0.9938	1033	1191	0.9196	1825	362	6.452		gi|8356|emb|CAA44963.1| protein kinase [Drosophila melanogaster] protein kinase
sw09024	394	488	0.8037	820	780	0.9789	690	1365	0.5427	2542	236	13.6808		gi|88698232|gb|AAY87162.2| trehalose 6-phosphate synthase [Helicoverpa armigera]
sw09038	1431	1174	1.4244	1650	1822	1.1783	1698	2275	0.7678	6458	1286	4.4252		gi|32029913|ref|ZP_00132857.1| COG0451: Nucleoside-diphosphate-sugar epimerases [Haemophilus somnus 2336] COG0451: Nucleoside-diphosphate-sugar epimerases [Haemophilus somnus 129PT] COG0451: Nucleoside-diphosphate-sugar epimerases [Haemophilus somnus 129PT]
sw09042	1164	1665	0.7661	1135	790	1.7863	1711	880	2.4545	788	1097	0.933
sw09048	491	474	1.4235	297	409	1.0812	793	321	2.6239	1264	434	3.4743		gi|68393171|ref|XP_688756.1| PREDICTED: similar to Calcitonin gene-related peptide type 1 receptor precursor (CGRP type 1 receptor) (Calcitonin receptor-like receptor) [Danio rerio]
sw09049	830	926	1.1026	1943	1722	1.3362	918	731	1.2681	235	1142	0.2952		gi|68423733|ref|XP_700192.1| PREDICTED: similar to zinc finger protein 239 (predicted), partial [Danio rerio]
sw09054	8705	9563	0.8294	10300	11123	0.9681	7394	10760	0.7489	7420	15839	0.4431		gi|46250236|gb|AAH68340.1| SDA1 domain containing 1 [Danio rerio]
sw09055	95	224		174	302		1398	324	5.0506	2	293			gi|22000820|gb|AAM88288.1| cuticle protein 36 [Manduca sexta] Pupal cuticle protein 36 precursor (MsCP36) (MS-PCP36)
sw09066	703	1018	0.8405	680	602	1.4137	422	922	0.5258	55	1754	0.0553
sw09094	10453	9953	0.8821	13315	7400	1.4955	9371	5709	1.6578	2013	12696	0.1327
sw09099	351	231		925	462	2.323	1214	470	2.5897	1371	236	8.3419		gi|48118852|ref|XP_396437.1| PREDICTED: similar to ENSANGP00000011354 [Apis mellifera]
sw09103	2668	2443	0.9151	2327	2377	0.971	762	1625	0.5745	150	1984	0.0822
sw09118	3781	2240	1.6401	4882	4708	1.0372	1789	2184	0.9547	17798	1812	12.0975		gi|58394522|ref|XP_320780.2| ENSANGP00000014129 [Anopheles gambiae str. PEST] ENSANGP00000014129 [Anopheles gambiae str. PEST]
sw09126	463	522	1.0665	591	979	0.6642	212	1004	0.267	93	803	0.2097		No hits found
sw09128	351	2081	0.1805	242	1521	0.1737	147	476	0.3606	195	365			gi|6815281|gb|AAF28475.1| V-ATPase 110 kDa integral membrane subunit [Aedes aegypti]
sw09129	33720	32334	0.8411	50229	40816	1.0003	36785	36154	0.8848	57726	15450	2.8476		gi|24585535|ref|NP_610071.1| CG9338-PA [Drosophila melanogaster] GH07967p [Drosophila melanogaster] CG9338-PA [Drosophila melanogaster]
sw09134	2165	2037	1.0776	3930	3185	1.2701	2094	2129	1.1065	294	2968	0.1413		gi|50745792|ref|XP_420245.1| PREDICTED: similar to synaptotagmin-like 4 (granuphilin-a); granuphilin-a [Gallus gallus]
sw09154	1935	1427	1.502	6477	4187	1.5443	4881	3303	1.5451	5445	485	12.8024		gi|68192722|gb|EAN07375.1| Glucose-methanol-choline oxidoreductase:GMC oxidoreductase [Mesorhizobium sp. BNC1] Glucose-methanol-choline oxidoreductase:GMC oxidoreductase [Mesorhizobium sp. BNC1]
sw09155	1420	1148	1.1933	966	1514	0.6405	1177	631	2.5015	816	1114	0.778
sw09158	285	604	0.6274	337	620	0.7013	303	475	0.8821	3186	485	7.9534		gi|55240294|gb|EAA09676.2| ENSANGP00000012643 [Anopheles gambiae str. PEST] ENSANGP00000012643 [Anopheles gambiae str. PEST]
sw09160	1802	1885	0.8867	2244	2244	0.9085	2646	2584	1.114	200	1672	0.1224		gi|54635939|gb|EAL25342.1| GA11509-PA [Drosophila pseudoobscura]
sw09161	699	909	0.8918	543	684	0.9581	897	487	2.2155	761	802	1.2015		gi|7248459|gb|AAF43497.1| arabinogalactan protein [Zea mays]
sw09186	151	263		144	388		48	194		1166	457	2.7622		gi|87248197|gb|ABD36151.1| phytanoyl-CoA dioxygenase peroxisomal precursor [Bombyx mori]
sw09207	542	446	1.2136	941	798	1.2088	479	223	2.7776	2849	597	5.8568		gi|55959300|emb|CAI16930.1| RP1-95L4.1 [Homo sapiens] RP1-95L4.1 [Homo sapiens] RP1-95L4.1 [Homo sapiens] Androgen-induced protein 1 (AIG-1)
sw09221	2244	2386	1.0115	2655	2882	1.0717	2549	2557	0.9632	860	2155	0.4971		gi|17864390|ref|NP_524779.1| separation anxiety CG12352-PA [Drosophila melanogaster] AT27602p [Drosophila melanogaster] CG12352-PA [Drosophila melanogaster] separation anxiety protein [Drosophila melanogaster] Probable acetyltransferase san (Protein separation anxiety)
sw09222	1543	2087	0.8454	1470	1899	1.0118	1103	1060	1.05	8089	1042	6.6076
sw09227	4063	1587	2.5766	12485	5312	2.523	12266	6681	1.6457	7102	282	20.769
sw09253	1362	1283	1.1999	1805	2047	1.0366	5264	2367	2.2848	3393	277	10.555		gi|72147038|ref|XP_794932.1| PREDICTED: similar to putative protein, with at least 6 transmembrane domains (53.0 kD) (XK70) [Strongylocentrotus purpuratus]
sw09254	5629	4394	1.2408	6467	5179	1.1725	5890	4277	1.3772	1164	5914	0.2139		gi|68245560|gb|EAN27680.1| transferase hexapeptide repeat:Plasmodium histidine-rich [Magnetococcus sp. MC-1] transferase hexapeptide repeat:Plasmodium histidine-rich [Magnetococcus sp. MC-1]
sw09265	607	543	1.4323	621	717	1.1046	1048	675	1.6243	1184	545	2.3546		gi|27451613|gb|AAO15004.1| sorting nexin 13 [Takifugu rubripes]
sw09267	236	146		686	242	3.4031	4341	683	5.2388	32	111			gi|13537190|dbj|BAB40771.1| chitinase-related protein 1 [Bombyx mori]
sw09269	739	1191	0.7143	497	643	1.0187	1073	852	1.2961	55	863	0.1338		gi|24649045|ref|NP_732756.1| CG5326-PB, isoform B [Drosophila melanogaster] CG5326-PB, isoform B [Drosophila melanogaster]
sw09286	797	682	1.274	860	1020	0.9524	624	843	0.8441	892	550	2.1051		gi|76644301|ref|XP_873123.1| PREDICTED: similar to essential meiotic endonuclease 1 homolog 1 isoform 2 [Bos taurus]
sw09307	3199	3535	0.7548	3017	5280	0.565	1646	1702	1.0521	5472	2002	2.9118
sw09342	2264	1591	1.5505	2360	2398	1.0617	2039	989	2.1269	1463	1755	0.9765		gi|55391488|gb|AAH85356.1| Tubgcp3 protein [Rattus norvegicus]
sw09354	2103	1714	1.3347	3289	2165	1.6074	2056	1180	1.8685	3843	1942	2.2421		gi|57236096|gb|AAW48725.1| dicer-2 [Aedes aegypti]
sw09376	4373	3182	1.1513	8972	3899	2.0147	2007	1178	1.782	554	2403	0.2531		gi|66534828|ref|XP_623419.1| PREDICTED: similar to arrow, partial [Apis mellifera]
sw09380	116	215		91	196		2407	215	13.1502	87	157			gi|57095098|ref|XP_539015.1| PREDICTED: similar to elongation of very long chain fatty acids (FEN1/Elo2, SUR4/Elo3, yeast)-like 4 [Canis familiaris]
sw09389	1391	971	1.4184	1608	1574	1.057	1691	1165	1.5357	2620	862	3.1882		gi|66548589|ref|XP_393604.2| PREDICTED: similar to thioredoxin domain containing 11 [Apis mellifera]
sw09405	1218	2338	0.5045	1833	3212	0.5904	2822	6014	0.5375	2137	1045	2.0648
sw09421	158	231		259	471	0.9395	826	563	1.6961	2036	158	16.3216		gi|126500|sp|P13129|LUCI_LUCCR Luciferin 4-monooxygenase (Luciferase) luciferase
sw09424	1586	1731	1.0215	2257	2871	0.9177	2236	3118	0.6658	3523	1346	2.3543		gi|74356259|gb|AAI04710.1| LOC500420 protein [Rattus norvegicus]
sw09441	340	534	0.8475	326	473	1.0279	924	469	2.1121	421	278	1.9484		gi|55241298|gb|EAA08657.2| ENSANGP00000011231 [Anopheles gambiae str. PEST] ENSANGP00000011231 [Anopheles gambiae str. PEST]
sw09447	547	651	0.9808	768	990	0.9483	796	1009	0.914	1349	668	2.2046		gi|82941226|dbj|BAE48744.1| heat shock protein 19.5 [Plutella xylostella]
sw09449	1666	2071	0.8498	1969	2559	0.9043	2020	2627	0.7117	5143	1728	2.3025		gi|54642240|gb|EAL30989.1| GA17761-PA [Drosophila pseudoobscura]
sw09451	1722	1272	1.3681	1506	1741	0.965	1248	2023	0.6807	5897	1263	4.5545		gi|73991331|ref|XP_542897.2| PREDICTED: similar to Hydroxyacid oxidase 1 (HAOX1) (Glycolate oxidase) (GOX) isoform 1 [Canis familiaris]
sw09452	2831	3472	0.731	3212	3447	0.9462	2809	3135	0.8288	1178	2818	0.4116		gi|55237775|gb|EAA12185.2| ENSANGP00000010111 [Anopheles gambiae str. PEST] ENSANGP00000010111 [Anopheles gambiae str. PEST]
sw09475	2319	2112	0.9374	2187	2108	1.0404	2686	2591	1.0684	984	2179	0.446		gi|6691135|gb|AAF24502.1| SP460 [Drosophila melanogaster]
sw09480	531	476	1.2214	739	644	1.1634	517	374	1.5904	1038	611	2.2828		gi|57236096|gb|AAW48725.1| dicer-2 [Aedes aegypti]
sw09481	4755	11384	0.3787	5482	14281	0.4088	4132	9528	0.4323	1163	8671	0.126		gi|62647077|ref|XP_578244.1| PREDICTED: similar to mucin 17 [Rattus norvegicus]
sw09506	1586	1566	1.0562	2304	2318	1.0167	1112	2812	0.4473	99	2742	0.0601		gi|6560645|gb|AAF16700.1| juvenile hormone binding protein precursor-like protein [Manduca sexta]
sw09511	2538	7109	0.2937	1785	8251	0.1774	1064	2305	0.5116	2833	2923	1.0322		gi|6815281|gb|AAF28475.1| V-ATPase 110 kDa integral membrane subunit [Aedes aegypti]
sw09519	1406	951	1.6019	1458	1222	1.2871	1102	1005	1.2921	291	1544	0.2668
sw09522	3152	4654	0.6658	5414	5064	1.0923	4813	5058	1.0288	2230	4776	0.4844		gi|76625977|ref|XP_871605.1| PREDICTED: similar to CG8580-PA, isoform A isoform 1 [Bos taurus]
sw09544	822	725	1.1496	1635	1773	0.8532	1327	2148	0.7041	4910	720	12.3141		gi|87248077|gb|ABD36091.1| arginase [Bombyx mori]
sw09554	28897	441	64.0001	147	157		22219	350	41.6548	21	3201	0.0133		gi|71666350|ref|XP_820135.1| trans-sialidase [Trypanosoma cruzi strain CL Brener] trans-sialidase, putative [Trypanosoma cruzi]
sw09564	1902	1578	1.0975	2568	2316	0.9942	1669	1465	1.2065	3785	1289	4.1973
sw09592	368	73		31	128		984	170	7.2675	10	487	0.0996
sw09626	9659	7908	1.1356	8644	8895	1.0239	9709	5416	2.1338	8151	7348	1.0937		gi|72679333|gb|AAI00144.1| Dctn4 protein [Rattus norvegicus] p62 dynactin subunit [Rattus norvegicus]
sw09629	1413	1598	1.0125	2800	3601	0.9214	2201	5161	0.4312	5755	851	6.6441		gi|15076612|dbj|BAB62418.1| kynurenine 3-monooxygenase [Bombyx mori]
sw09635	1388	1215	1.18	1408	1716	0.9212	2280	2535	0.9474	29	1112	0.0398		gi|4530064|gb|AAD21841.1| trypsin-like serine protease [Ctenocephalides felis]
sw09640	694	1064	0.6765	702	1020	0.7803	550	694	0.8064	29	983	0.0321		gi|55234500|gb|EAA43295.2| ENSANGP00000022827 [Anopheles gambiae str. PEST] ENSANGP00000022827 [Anopheles gambiae str. PEST]
sw09642	843	794	1.2404	555	822	0.8977	1084	580	2.3142	690	841	0.9891		gi|54036705|sp|P67788|AKH_MANSE Adipokinetic prohormone precursor [Contains: Adipokinetic hormone (AKH)] adipokinetic hormone prepropeptide
sw09644	2722	2157	1.2605	2530	3042	0.8498	1905	3839	0.4482	1748	3863	0.4224		gi|74003338|ref|XP_849485.1| PREDICTED: similar to ATP-binding cassette, sub-family F (GCN20), member 3 isoform 2 [Canis familiaris]
sw09645	8440	5831	1.3588	13557	14073	1.0253	13990	10382	1.3585	16378	4509	2.2579		gi|72013220|ref|XP_802046.1| PREDICTED: similar to peptidylprolyl isomerase B isoform 5 [Strongylocentrotus purpuratus]
sw09662	399	404	1.2827	516	578	1.0915	418	313	1.8637	838	424	2.4412
sw09674	12362	11865	0.8607	14346	14253	0.8595	12465	11154	1.1247	26119	4783	3.9254		gi|87248609|gb|ABD36357.1| signal sequence receptor [Bombyx mori]
sw09696	1833	1361	1.3193	2168	1495	1.3391	1410	711	2.106	2079	808	2.6163
sw09712	3379	3304	0.9083	6566	5056	1.1353	6168	5671	1.1662	10308	1703	5.3129		gi|87248351|gb|ABD36228.1| mitochondrial aldehyde dehydrogenase [Bombyx mori]
sw09735	1583	1434	1.0354	1579	1681	0.9331	1651	2205	0.8822	2859	1325	2.2766		gi|76634500|ref|XP_584372.2| PREDICTED: similar to alcohol dehydrogenase, iron containing, 1 isoform 1 [Bos taurus]
sw09738	342	684	0.6469	388	667	0.735	1219	879	1.5859	1747	510	4.4589
sw09741	1692	987	1.788	4574	2454	1.9553	2789	2121	1.5339	3689	423	7.529		gi|88193380|emb|CAJ77191.1| beta1,4-galactosyltransferase 7 [Drosophila mojavensis]
sw09747	695	530	1.3684	1183	873	1.3891	5912	913	7.6374	2817	354	9.2355		gi|87248331|gb|ABD36218.1| alpha-N-acetylgalactosaminidase [Bombyx mori]
sw09759	7189	7062	0.7617	6800	5993	1.0397	3235	5596	0.6594	1203	7334	0.1748		gi|50756213|ref|XP_415062.1| PREDICTED: similar to phosphatidylinositol 4-kinase, catalytic, alpha polypeptide isoform 2; phosphatidylinositol 4-kinase, type II, alpha; phosphatidylinositol 4-kinase, type III, alpha; phosphatidylinositol 4-kinase 230 [Gallus gallus]
sw09766	4951	2638	1.7293	3983	4080	0.9339	4287	1926	2.0602	3242	2877	1.0819
sw09776	14507	17537	0.5642	38582	27803	1.0872	28844	13818	2.5201	25485	6154	2.7583		gi|9837385|gb|AAG00554.1| retinitis pigmentosa GTPase regulator-like protein [Takifugu rubripes]
sw09799	313	527	0.8844	160	313		57	242		10	983	0.0437		gi|66524373|ref|XP_391993.2| PREDICTED: similar to Hypothetical protein CBG01854 [Apis mellifera]
sw09801	455	510	1.1671	475	383	1.8075	1166	385	3.6771	211	353			gi|28603510|gb|AAO47838.1| immunoglobulin-like cell adhesion protein [Drosophila virilis]
sw09808	1680	1129	1.7789	2100	1859	1.3618	4072	1972	2.1032	9066	902	8.0385		gi|89290411|gb|EAR88399.1| Bifunctional endo-1,4-beta-xylanase xylA precursor, putative [Tetrahymena thermophila SB210]
sw09817	634	476	1.8196	340	548	0.9545	1021	526	2.0018	1241	1010	1.3865
sw09820	4201	4256	0.9593	3672	2955	1.3793	5996	2297	2.5151	9383	3465	2.4275		gi|431944|emb|CAA53948.1| Ppk 98; a protein kinase [Sus scrofa] Endoplasmin precursor (94 kDa glucose-regulated protein) (GRP94) (GP96 homolog) (98 kDa protein kinase) (PPK 98) (ppk98)
sw09821	2579	2828	0.9701	2861	2862	1.1726	3063	2440	1.2839	280	2094	0.1749		gi|27819785|gb|AAO24941.1| RE65015p [Drosophila melanogaster]
sw09826	255	875	0.4318	59	207		143	241		74	463	0.3122		gi|118277|sp|P12026|ACBP_PIG Acyl-CoA-binding protein (ACBP) (Diazepam-binding inhibitor) (DBI) (Endozepine) (EP) [Contains: DBI(32-86)]
sw09830	296	675	0.6274	207	577	0.5931	137	1637	0.0884	42	493	0.2011
sw09857	1240	1245	1.0308	1958	2066	1.0263	2279	2321	0.9843	2834	1226	2.4369		gi|72013337|ref|XP_783848.1| PREDICTED: similar to hydroxyacylglutathione hydrolase [Strongylocentrotus purpuratus]
sw09862	1543	1365	1.1472	1778	1892	0.9775	1494	1527	1.0366	2741	1184	2.4596		gi|72124329|ref|XP_783397.1| PREDICTED: similar to phosphatidylinositol glycan, class T, partial [Strongylocentrotus purpuratus]
sw09877	1021	420	2.6259	203	701	0.3794	191	4615	0.0261	122	470	0.4249		No hits found
sw09888	2408	4733	0.4311	2833	4733	0.5661	2401	2980	0.8316	2043	2944	0.6518		gi|1419687|emb|CAA67343.1| 40-kDa V-ATPase subunit [Manduca sexta] Vacuolar ATP synthase subunit d (V-ATPase d subunit) (Vacuolar proton pump d subunit) (V-ATPase 40 kDa subunit) (M40)
sw09891	4830	4135	1.087	5134	4051	1.2622	4690	4998	1.1138	345	7199	0.0641		No hits found
sw09895	1707	1681	1.014	1609	1671	0.9958	1203	1788	0.7619	182	1773	0.1544
sw09911	1818	1555	1.0793	2533	2223	1.1661	2886	2749	1.2904	4307	1203	3.1698		gi|49898976|gb|AAH76692.1| Peroxiredoxin 4 [Xenopus tropicalis] peroxiredoxin 4 [Xenopus tropicalis] peroxiredoxin 4 [Xenopus tropicalis]
sw09914	22004	13054	1.5498	27434	21219	1.1854	22625	19792	1.1589	2353	15698	0.1381		gi|90567702|emb|CAI30054.1| muscular protein 20 [Carabus punctatoauratus]
sw09945	14495	11326	0.9618	24746	19952	1.0294	13822	14852	1.018	56191	4998	7.8034		gi|114058|sp|P13276|APL3_MANSE Apolipophorin-3 precursor (Apolipophorin-III) (ApoLp-III) apolipophorin-III precursor apolipophorin-III
sw09946	285	250		629	585	1.2508	1777	823	2.0694	2596	287	9.9039		gi|54289246|gb|AAV31913.1| pyrroline-5-carboxylate synthase [Aedes aegypti]
sw09969	4442	5098	0.7392	4112	4148	0.9629	5449	4821	1.1689	799	3756	0.286		gi|19528505|gb|AAL90367.1| RE41295p [Drosophila melanogaster]
sw09997	782	802	1.1607	878	1385	0.8574	769	963	0.8566	1252	613	2.5475		gi|15963415|dbj|BAB69463.1| paralytic peptide [Bombyx mori]
sw10001	371	282		608	806	1.0246	856	486	1.8343	3957	201	22.1487		gi|295756|emb|CAA33113.1| TU-36B protein [Drosophila melanogaster]
sw10017	3835	3513	1.0861	4519	2238	2.2201	4126	1953	2.1479	279	3422	0.1037		gi|18700459|dbj|BAB85197.1| Titin-like protein [Bombyx mori]
sw10033	820	1020	0.9356	1464	1862	0.8898	950	1870	0.496	557	2019	0.3526		gi|66840976|emb|CAI64033.1| putative OS-D-like protein [Myzus persicae] OS-D-like protein, OS-D1 [Myzus persicae]
sw10047	516	2072	0.2389	257	1096	0.3201	232	362		1215	1462	0.9063		No hits found
sw10064	1406	1266	1.0338	2427	1694	1.2615	2627	1555	1.5763	2859	961	3.5318		gi|66540209|ref|XP_624722.1| PREDICTED: similar to Zgc:92093 [Apis mellifera]
sw10101	902	1150	0.9317	1627	1394	1.3667	2516	1682	1.6264	3392	651	7.3765		gi|50839344|gb|AAT82011.1| putative flavin-containing amine oxidase [Propionibacterium acnes KPA171202] putative flavin-containing amine oxidase [Propionibacterium acnes KPA171202]
sw10102	10657	9817	1.0126	17870	16898	0.9874	16628	15288	1.1186	25573	8168	2.5506		gi|45382959|ref|NP_990855.1| phosphoribosylaminoimidazole carboxylase, phosphoribosylaminoimidazole succinocarboxamide synthetase [Gallus gallus] Multifunctional protein ADE2 [Includes: Phosphoribosylaminoimidazole-succinocarboxamide synthase (SAICAR synthetase); Phosphoribosylaminoimidazole carboxylase (AIR carboxylase) (AIRC)] 5-aminoimidazole ribonucleotide (AIR) carboxylase-5- aminoimidazole-…
sw10126	609	998	0.7244	1526	1693	0.9864	1398	1924	0.8607	3065	785	4.6182		gi|67464485|pdb|1YIZ|B Chain B, Aedes Aegypti Kynurenine Aminotrasferase Chain A, Aedes Aegypti Kynurenine Aminotrasferase
sw10136	449	518	0.9363	744	1552	0.4536	109	246		184	482	0.6014
sw10163	1785	1347	1.1696	1241	930	1.3635	1538	1406	1.2314	185	1066	0.2121		gi|28317101|gb|AAO39569.1| LP02021p [Drosophila melanogaster]
sw10164	211	230		340	138		864	279	3.6945	22	239			gi|60677859|gb|AAX33436.1| RE32747p [Drosophila melanogaster]
sw10165	385	404	1.0708	427	630	0.802	835	766	1.2472	2610	366	6.4555		No hits found
sw10172	6668	4505	1.0968	9531	7374	1.0184	4044	4441	0.9748	964	4526	0.2119
sw10204	765	715	1.3402	473	528	1.2163	890	411	2.2242	41	549	0.1611
sw10234	1250	1228	1.134	2119	1677	1.3369	843	569	1.84	411	1150	0.4184
sw10248	4412	4331	0.8377	5440	4463	1.0378	3232	3951	0.7758	1345	3334	0.3688		No hits found
sw10272	761	537	1.5331	1438	952	1.4177	1828	852	2.2659	2130	539	4.1339		gi|62662184|ref|XP_214279.3| PREDICTED: similar to stabilin-1 [Rattus norvegicus]
sw10294	799	697	1.3602	972	1044	1.0742	898	757	1.3499	1907	945	2.4479		gi|116273|sp|P13531|CHCA1_BOMMO Chorion class CA protein ERA.1 precursor chorion protein
sw10301	1465	1292	1.3122	1355	1378	1.1258	1157	745	1.7118	664	1901	0.3983
sw10322	1809	1783	1.091	1675	2011	0.8373	2553	1158	2.0959	1484	1804	0.8923		gi|87248289|gb|ABD36197.1| CDC42 small effector 2-like protein [Bombyx mori]
sw10332	3286	2468	1.1489	4076	4137	0.8428	2835	4472	0.6924	4670	2577	2.2513		gi|50880262|emb|CAG25590.1| CAP-G protein [Drosophila melanogaster]
sw10358	371	539	0.8694	311	586	0.6326	550	864	0.7013	879	474	2.5057		gi|62859459|ref|NP_001016090.1| hypothetical protein LOC548844 [Xenopus tropicalis]
sw10398	2913	3130	0.9497	3487	3955	0.9699	3017	4237	0.7901	1144	3560	0.3696		gi|55238934|gb|EAL40009.1| ENSANGP00000025578 [Anopheles gambiae str. PEST] ENSANGP00000025578 [Anopheles gambiae str. PEST]
sw10424	3142	2725	1.0592	4933	4308	1.0143	4648	3836	1.113	14151	1342	10.4169		gi|66801391|ref|XP_629621.1| putative protein kinase [Dictyostelium discoideum] putative protein kinase [Dictyostelium discoideum]
sw10434	898	1515	0.6518	985	1580	0.7011	1182	993	1.2967	373	1324	0.3625
sw10501	9802	5694	1.5026	14386	13219	1.0139	8678	14255	0.6849	31258	1612	9.2277		gi|18148669|dbj|BAB83366.1| chymotrypsin inhibitor [Bombyx mori]
sw10509	6531	4692	1.2592	5896	4851	1.2046	3829	3660	1.2028	788	9162	0.0963		gi|61105830|gb|AAX38588.1| serine protease inhibitor [Argopecten irradians]
sw10558	953	851	1.2479	780	638	1.2885	834	744	1.2215	1896	918	2.5135		gi|68534706|gb|AAH98614.1| Hypothetical protein LOC564388 [Danio rerio] hypothetical protein LOC564388 [Danio rerio]
sw10564	755	602	1.6938	827	1204	0.9084	752	1384	0.4993	2844	341	8.0253
sw10573	766	671	1.3536	516	762	0.9958	5355	227	30.4903	1182	1861	0.7689		gi|55245618|gb|EAL41836.1| ENSANGP00000027947 [Anopheles gambiae str. PEST] ENSANGP00000027947 [Anopheles gambiae str. PEST]
sw10574	6270	6150	1.004	6594	9312	0.8015	5997	13412	0.4732	603	8309	0.0919		gi|87248595|gb|ABD36350.1| salivary cysteine-rich peptide [Bombyx mori]
sw10579	2379	3278	0.769	3239	3381	1.0866	2728	3760	0.7522	862	2504	0.42		gi|66525580|ref|XP_624401.1| PREDICTED: similar to GA10458-PA [Apis mellifera]
sw10624	2586	3099	0.7669	2970	2289	1.2009	2877	3068	0.867	309	1871	0.1634
sw10633	1363	1755	0.7969	1629	1887	0.9523	1230	1880	0.6439	80	2112	0.0502		gi|60677953|gb|AAX33483.1| RE01655p [Drosophila melanogaster]
sw10636	695	1228	0.5629	972	1059	0.9018	646	1148	0.5962	21	904	0.0365		gi|24652250|ref|NP_724856.1| CG1441-PA, isoform A [Drosophila melanogaster] CG1441-PB, isoform B [Drosophila melanogaster] GH13752p [Drosophila melanogaster] CG1441-PB, isoform B [Drosophila melanogaster] CG1441-PA, isoform A [Drosophila melanogaster]
sw10647	288	483	0.6777	110	185		18	127		8	878	0.0332		gi|3608259|dbj|BAA33195.1| cuticle protein [Bombyx mori]
sw10661	1567	875	1.9983	1271	1540	0.8983	1322	722	2.1367	1248	1324	1.0979
sw10671	2149	2270	0.9166	1581	1224	1.4005	1504	879	2.0579	144	1322	0.1727
sw10674	10345	10924	0.8739	19558	9576	1.9873	14598	8095	1.7589	21878	7036	2.6006		gi|192050|gb|AAA37265.1| mitochondrial aspartate aminotransferase
sw10693	2709	3085	0.857	3660	4564	0.7917	2949	3882	0.8617	7062	2380	2.0183		gi|15341891|gb|AAH13129.1| Chromosome 2 open reading frame 30 [Homo sapiens] XTP3-transactivated protein B [Homo sapiens] chromosome 2 open reading frame 30 [Homo sapiens] unknown [Homo sapiens] XTP3-transactivated gene B protein precursor
sw10701	400	371	1.4234	388	503	0.9988	923	338	3.3987	341	476	1.1486
sw10704	26972	16665	1.1503	40576	27644	1.1812	28757	21901	1.4213	3630	20717	0.127		gi|5833948|gb|AAD53751.1| death-associated LIM only protein DALP [Manduca sexta]
sw10744	2870	2865	0.7862	3269	1686	1.6025	2530	1613	1.6867	512	2236	0.2652
sw10753	798	1389	0.7023	714	749	1.2961	669	925	0.7814	177	1514	0.1819		gi|57917675|ref|XP_556653.1| ENSANGP00000025755 [Anopheles gambiae str. PEST] ENSANGP00000025755 [Anopheles gambiae str. PEST]
sw10755	981	814	1.4865	1111	1572	0.9625	1593	1692	0.9508	216	1139	0.3112		gi|82953787|ref|XP_895685.1| PREDICTED: similar to oxoglutarate dehydrogenase-like isoform 2 [Mus musculus] PREDICTED: similar to oxoglutarate dehydrogenase-like [Mus musculus]
sw10758	1153	1350	1.0109	1141	1383	1.101	1418	1667	0.8659	27	820	0.0834		gi|66499360|ref|XP_396507.2| PREDICTED: similar to CG11550-PA [Apis mellifera]
sw10762	7867	6205	1.2245	6517	7528	0.9892	11744	3476	3.5865	26087	4605	4.3134		gi|58394466|ref|XP_320745.2| ENSANGP00000008856 [Anopheles gambiae str. PEST] ENSANGP00000008856 [Anopheles gambiae str. PEST]
sw10772	916	1054	1.0178	1029	877	1.4318	936	678	1.3822	155	827	0.2591		gi|66525417|ref|XP_393163.2| PREDICTED: similar to LIM domain protein [Apis mellifera]
sw10773	244	371		332	341		939	462	2.1204	39	545	0.1866		gi|30178562|gb|EAA45375.1| ENSANGP00000023091 [Anopheles gambiae str. PEST] ENSANGP00000023091 [Anopheles gambiae str. PEST]
sw10791	118	178		233	306		255	454	0.7613	1204	169	9.8115
sw10795	1017	1718	0.622	1245	1275	1.1157	895	1562	0.6539	377	1365	0.2934		gi|85857604|gb|ABC86337.1| IP14646p [Drosophila melanogaster]
sw10798	15346	27952	0.5396	12816	14108	0.8213	5337	6147	0.829	900	43837	0.0219		gi|4191331|gb|AAD09748.1| Gasp precursor [Drosophila melanogaster]
sw10803	201	214		230	456	0.7367	273	403	0.9306	1005	186	6.6815		gi|27462828|gb|AAO15603.1| sensory neuron membrane protein [Mamestra brassicae]
sw10805	1765	1597	1.1803	2769	2335	1.2547	2672	3041	0.8297	432	2559	0.2277		gi|11863156|ref|NP_066934.1| RECK protein precursor [Homo sapiens] reversion-inducing-cysteine-rich protein with kazal motifs [Homo sapiens] reversion-inducing-cysteine-rich protein with kazal motifs [Homo sapiens] Reversion-inducing cysteine-rich protein with Kazal motifs precursor (hRECK) (Suppressor of tumorigenicity 15) (ST15) hRECK~metastasis and invasion [Homo sapiens]
sw10814	8191	13289	0.5102	8749	28379	0.2473	698	11791	0.035	409	12600	0.0304
sw10815	404	379	1.2498	557	544	1.241	567	725	0.9057	926	482	2.1806		gi|73969379|ref|XP_531710.2| PREDICTED: similar to serine hydrolase-like 2 [Canis familiaris]
sw10845	1916	2157	0.8622	1799	2065	0.9148	3899	2606	1.571	617	2284	0.2853		gi|66526767|ref|XP_393136.2| PREDICTED: similar to ENSANGP00000013077 [Apis mellifera]
sw10848	304	460	0.7719	410	780	0.5639	75	430	0.2826	24	1049	0.0493		gi|1706194|sp|P80683|CUA3A_TENMO Larval cuticle protein A3A (TM-A3A) (TM-LCP A3A)
sw10854	300	480	0.784	1065	1354	0.8404	492	1091	0.5452	350	1247	0.4128		gi|11121443|emb|CAC14874.1| zinc/iron regulated transporter-related protein 3, DZIP3 protein [Drosophila melanogaster]
sw10865	4318	5587	0.7875	5256	7980	0.6312	2444	5602	0.4622	17233	2981	6.0738		gi|758796|gb|AAC46959.1| Sh23 [Schistosoma haematobium] 23 kDa integral membrane protein (Sh23)
sw10866	4403	4986	0.8661	3148	3835	0.8548	1121	2769	0.5071	316	3892	0.0989		gi|66515966|ref|XP_396216.2| PREDICTED: similar to corin [Apis mellifera]
sw10878	2643	2559	1.0769	4482	7366	0.6058	1132	5193	0.2904	16635	2331	6.7741		gi|32029913|ref|ZP_00132857.1| COG0451: Nucleoside-diphosphate-sugar epimerases [Haemophilus somnus 2336] COG0451: Nucleoside-diphosphate-sugar epimerases [Haemophilus somnus 129PT] COG0451: Nucleoside-diphosphate-sugar epimerases [Haemophilus somnus 129PT]
sw10888	1460	1386	0.9992	1761	829	2.2769	1482	904	1.7472	85	1535	0.0552
sw10890	893	4690	0.1898	831	2802	0.3069	766	1948	0.5129	434	1522	0.4103
sw10891	12734	11655	0.854	14503	15544	0.8218	14187	15338	1.1565	27040	6278	3.7622		gi|87248411|gb|ABD36258.1| signal sequence receptor beta subunit [Bombyx mori]
sw10893	4882	4078	1.1105	8245	8078	0.9768	4198	5416	0.8794	15581	2570	3.3824		gi|400673|sp|P31420|OMBP_MANSE Ommochrome-binding protein precursor (OBP) (YCP) ommochrome-binding protein
sw10912	12389	6553	1.4531	19897	11344	1.4477	14918	9455	1.7535	54331	2022	39.851		gi|74011918|ref|XP_848765.1| PREDICTED: similar to inter-alpha (globulin) inhibitor H4 (plasma Kallikrein-sensitive glycoprotein) [Canis familiaris]
sw10922	1657	2719	0.6541	2982	2163	1.4156	970	2146	0.4992	329	2941	0.1214
sw10936	3897	3990	0.7272	2605	2279	0.9853	2519	1463	1.8556	926	2478	0.3954		gi|55957148|emb|CAI17931.1| OTTHUMP00000042146 [Homo sapiens] OTTHUMP00000042146 [Homo sapiens] Aconitase 2, precursor [Homo sapiens] aconitase 2 precursor [Homo sapiens] ACO2 [Homo sapiens] Aconitate hydratase, mitochondrial precursor (Citrate hydro-lyase) (Aconitase) aconitate hydratase [Homo sapiens]
sw10937	4556	5581	0.6898	3766	3498	1.0484	5110	2955	1.7198	1304	4089	0.3931		gi|45383738|ref|NP_989519.1| aconitase 2, mitochondrial [Gallus gallus] aconitase precursor [Gallus gallus]
sw10949	3677	5635	0.6849	3172	5209	0.7341	3103	5752	0.4929	2766	4599	0.6837		gi|87248623|gb|ABD36364.1| mitochondrial intermembrane space translocase subunit Tim10 [Bombyx mori]
sw10976	401	428	1.3199	431	500	1.1861	591	632	0.9836	864	323	3.361		gi|37359766|dbj|BAC97861.1| mKIAA0083 protein [Mus musculus]
sw10979	1240	1456	0.8842	1185	1339	1.0165	2201	2227	1.0383	2320	984	2.3918
sw10980	980	959	1.1155	1052	1669	0.6715	1230	1335	0.9003	1666	684	3.6107		gi|66548097|ref|XP_397337.2| PREDICTED: similar to CG3652-PA [Apis mellifera]
sw10994	851	811	1.2415	423	596	0.8693	255	546	0.5146	44	1061	0.0682		gi|14330324|emb|CAC40811.1| aldo-keto reductase [Gallus gallus] aldo-keto reductase [Gallus gallus]
sw11000	401	416	1.1641	871	676	1.319	918	588	1.4571	2005	350	7.2049
sw11005	4982	2765	1.7772	9126	3470	2.5192	11787	4270	2.7344	16021	1415	7.9783		gi|22474517|dbj|BAC10621.1| Pleiotrophin-like protein [Bombyx mori] Pleiotrophin-like protein [Bombyx mori]
sw11016	1917	1917	0.8987	2418	2910	0.7547	1288	2074	0.6074	680	2881	0.2267		gi|85062656|gb|ABC69171.1| asparagine synthetase [Bombyx mori]
sw11030	3385	2560	1.2758	2318	1688	1.4444	1676	1080	1.9707	3624	1620	2.7107		gi|66510919|ref|XP_396525.2| PREDICTED: similar to maleless protein [Apis mellifera]
sw11035	2196	2020	0.9788	2464	2423	0.9776	1474	1761	0.9009	686	2243	0.355
sw11040	39313	27973	0.8879	64651	41328	1.1982	38525	39898	0.9873	694	48403	0.0125		gi|48427979|sp|P82119|CUO6_BLACR Cuticle protein 6 (BcNCP14.9)
sw11055	5915	5188	1.0396	8367	7600	1.0424	7887	8989	1.0505	27704	2989	7.3741		gi|14250391|gb|AAH08628.1| Cellular repressor of E1A-stimulated genes [Homo sapiens] CREG [Homo sapiens] cellular repressor of E1A-stimulated genes 1 [Homo sapiens] cellular repressor of E1A-stimulated genes [Homo sapiens] cellular repressor of E1A-stimulated genes CREG [Homo sapiens] Cellular repressor of E1A-stimulated genes [Homo sapiens] CREG1 protein precursor (Cellular repressor of E1A-stim…
sw11056	256	299		442	639	0.7779	135	277		4037	431	9.5756		gi|400673|sp|P31420|OMBP_MANSE Ommochrome-binding protein precursor (OBP) (YCP) ommochrome-binding protein
sw11067	2051	1708	1.0918	2735	1336	2.1835	3710	1061	4.8854	2146	2466	0.8101		gi|6683594|dbj|BAA89263.1| nuclear hormone receptor E75B [Bombyx mori]
sw11074	478	645	0.9452	667	630	1.3337	678	823	1.0348	1628	679	3.0884
sw11084	1774	2164	0.7615	1277	1300	0.9459	1135	1358	0.938	303	2030	0.1494		gi|55240446|gb|EAA09321.2| ENSANGP00000021714 [Anopheles gambiae str. PEST] ENSANGP00000021714 [Anopheles gambiae str. PEST]
sw11085	1418	924	1.6345	1386	1282	1.1701	1109	543	2.4518	852	1059	0.984
sw11109	519	826	0.7061	345	631	0.6488	231	501	0.6031	59	928	0.1184		gi|76643656|ref|XP_590464.2| PREDICTED: similar to SET and MYND domain containing 4 [Bos taurus]
sw11115	525	551	0.9803	322	365		276	218		67	931	0.1315
sw11116	12528	14286	0.6093	10845	13812	0.6036	6319	10771	0.6338	6758	18514	0.219
sw11128	523	430	1.2422	779	739	0.9872	430	656	0.7485	157	889	0.2776		gi|62656542|ref|XP_220708.3| PREDICTED: similar to novel protein [Rattus norvegicus]
sw11132	2867	2322	1.0063	2601	1820	1.2168	936	882	1.1607	569	1715	0.3935		gi|66499554|ref|XP_392144.2| PREDICTED: similar to CG32296-PA [Apis mellifera]
sw11139	591	863	0.909	734	738	1.4948	1315	1024	1.282	1928	616	3.3063
sw11149	7600	6228	1.1436	7750	10796	0.8077	12090	13487	0.822	38660	2486	14.4946
sw11150	3285	2901	1.2083	4235	4859	1.0415	6248	5037	1.3113	563	2892	0.2421		gi|82802466|ref|XP_915962.1| PREDICTED: similar to ADAM metallopeptidase with thrombospondin type 1 motif, 9 preproprotein isoform 3 [Mus musculus]
sw11152	707	1112	0.7649	660	1018	0.8825	1117	1267	0.8347	2049	796	2.5145		gi|2190189|dbj|BAA20370.1| MBF2 [Bombyx mori]
sw11153	1124	1370	0.9581	1027	956	1.3555	1824	1216	1.4919	108	1007	0.1824		gi|1622930|gb|AAB17350.1| putative RNA-binding protein [Drosophila melanogaster]
sw11164	521	929	0.6823	335	495	0.9506	390	472	0.9453	314	934	0.4189
sw11189	54925	56071	0.7531	73346	42119	1.4461	30687	52123	0.5966	2332	57692	0.0467
sw11198	502	672	0.925	271	347		143	199		40	895	0.0782
sw11201	156	188		454	451	1.2695	1039	613	1.7139	1617	214	9.8709		gi|66547675|ref|XP_623833.1| PREDICTED: similar to lysosomal alpha-N-acetyl glucosaminidase [Apis mellifera]
sw11215	10242	6745	1.1504	14240	9590	1.2784	12345	8355	1.3713	45899	4003	9.9066		gi|41016826|sp|Q27772|C1TC_SPOFR C-1-tetrahydrofolate synthase, cytoplasmic (C1-THF synthase) [Includes: Methylenetetrahydrofolate dehydrogenase ; Methenyltetrahydrofolate cyclohydrolase ; Formyltetrahydrofolate synthetase ] methylenetetrahydrofolate dehydrogenase methylenetetrahydrofolate dehydrogenase-cyclohydrolase-synthetase
sw11237	1405	1825	0.8307	2776	1757	1.635	1274	800	1.8283	179	1588	0.1274		gi|90265042|emb|CAH61079.2| CAST [Drosophila melanogaster]
sw11255	2626	2250	1.0316	2565	2111	1.2484	3590	1659	2.8626	1248	1777	0.7014		gi|55239870|gb|EAA10114.2| ENSANGP00000014351 [Anopheles gambiae str. PEST] ENSANGP00000014351 [Anopheles gambiae str. PEST]
sw11257	3602	5426	0.6864	3869	4233	0.9567	3031	2959	1.1101	781	6472	0.1065
sw11268	2156	1762	1.1151	1323	1570	0.7854	785	1483	0.6235	340	2955	0.1046		gi|28557615|gb|AAO45213.1| RE51574p [Drosophila melanogaster]
sw11269	3867	2926	1.2503	9616	7140	1.3072	10189	1686	7.5073	15701	3834	2.2504		gi|6735408|emb|CAB69054.1| fatty acid desaturase [Drosophila melanogaster]
sw11271	4686	4372	0.9154	5914	5034	1.0967	7935	5036	2.0279	19262	2476	7.7546		gi|55632035|ref|XP_520176.1| PREDICTED: similar to chromosome 9 open reading frame 5 [Pan troglodytes]
sw11275	629	493	1.4306	884	833	1.1571	699	701	1.2855	2717	403	8.5269		gi|24662101|ref|NP_652439.1| dpr6 CG14162-PA [Drosophila melanogaster] LD13525p [Drosophila melanogaster] CG14162-PA [Drosophila melanogaster]
sw11280	1863	1265	1.3622	2222	1535	1.4054	2119	894	2.4254	4936	1426	5.232
sw11292	305	187		847	467	1.9264	2735	644	4.3439	3368	190	37.2743
sw11317	545	873	0.6546	784	529	1.6235	183	781	0.3557	18	1006	0.0636		gi|27819801|gb|AAO24949.1| RE59468p [Drosophila melanogaster]
sw11332	1825	1961	1.0189	1664	2050	0.9829	2518	1939	1.2579	858	2058	0.4517
sw11342	203	1757	0.1592	14	1328	0.0334	343	605	0.611	7	343			gi|56118823|ref|NP_001008171.1| cystathionine-beta-synthase [Xenopus tropicalis] Cystathionine-beta-synthase [Xenopus tropicalis] cystathionine-beta-synthase [Xenopus tropicalis]
sw11348	10468	11526	0.7813	10466	11142	0.9498	10740	11280	0.9796	3696	12763	0.2528
sw11354	545	436	1.7188	661	836	1.0346	461	999	0.5485	9926	406	28.5909
sw11372	2241	687	4.1312	2275	816	3.5555	6589	3840	1.5963	41	700	0.073		gi|78093596|gb|ABB19289.1| cecropin B [Bombyx mori]
sw11374	2432	1595	1.5397	3820	2990	1.261	4846	2406	2.1375	13811	1293	9.0887		gi|66564326|ref|XP_393632.2| PREDICTED: similar to Pgcp protein [Apis mellifera] PREDICTED: similar to Pgcp protein [Apis mellifera]
sw11404	2741	2096	1.143	3379	2489	1.1759	2253	2874	0.7426	175	2800	0.0624		gi|55243869|gb|EAA06060.2| ENSANGP00000015235 [Anopheles gambiae str. PEST] ENSANGP00000015235 [Anopheles gambiae str. PEST]
sw11409	425	386	1.3191	1342	1100	1.3828	1463	372	5.1421	1921	631	3.2082		gi|158821|gb|AAA29050.1| zinc-finger homeodomain protein 1 [Drosophila melanogaster]
sw11414	383	620	0.7521	570	682	0.9644	340	478	0.8753	1771	679	3.556		gi|57044184|ref|XP_544499.1| PREDICTED: similar to UDP-galactose-4-epimerase [Canis familiaris]
sw11415	4036	3222	1.063	4062	4205	0.8876	4625	4107	1.2943	730	5821	0.1338
sw11425	1119	1731	0.71	2047	1609	1.3449	1444	1368	1.1239	321	1697	0.2104		gi|54645712|gb|EAL34450.1| GA18043-PA [Drosophila pseudoobscura]
sw11465	80	140		155	204		1338	326	5.1178	35	129			gi|24585910|ref|NP_610188.1| CG14470-PA [Drosophila melanogaster] CG14470-PA [Drosophila melanogaster]
sw11481	7472	6359	0.9662	9036	9286	0.8808	5614	7201	0.8555	5211	10402	0.496		gi|76625653|ref|XP_870955.1| PREDICTED: similar to Brix domain containing protein 1 isoform 2 [Bos taurus]
sw11493	635	558	1.2449	555	551	1.2094	373	220		816	482	2.06		gi|50732970|ref|XP_418850.1| PREDICTED: similar to calmodulin-dependent cyclic nucleotide phosphodiesterase [Gallus gallus]
sw11495	2778	2137	1.1083	2596	2669	0.9306	2714	2556	1.12	8515	1341	5.8563		gi|72049850|ref|XP_787337.1| PREDICTED: similar to solute carrier family 2, (facilitated glucose transporter), member 8 [Strongylocentrotus purpuratus]
sw11501	3010	3383	0.8514	2886	1673	1.7867	1011	1512	0.7474	123	1811	0.1111
sw11509	2573	3103	0.7474	1883	3985	0.491	3194	4777	0.7378	207	1882	0.1885		gi|86450721|gb|ABC96696.1| yellow3 [Bombyx mori]
sw11511	4288	3453	0.9894	4903	4436	1.0218	4300	5046	0.9283	494	4173	0.1154
sw11540	1325	1383	1.0725	1666	1160	1.7063	1659	1310	1.22	248	1824	0.164		gi|9837385|gb|AAG00554.1| retinitis pigmentosa GTPase regulator-like protein [Takifugu rubripes]
sw11565	4550	4162	1.0651	6257	6148	1.1209	9135	5582	1.661	22099	2609	5.0514		gi|12657593|dbj|BAB21565.1| laminin [Bombyx mori]
sw11576	1941	2315	0.8028	139	2045	0.0988	2	218		15	2745	0.0067		gi|47605411|sp|Q7M4F1|CUD4_SCHGR Endocuticle structural glycoprotein SgAbd-4
sw11582	2146	2181	1.0178	1425	2836	0.4891	35	396		61	2144	0.0384
sw11587	1316	1308	0.9036	1684	1869	0.9182	1776	1548	1.2	5394	1375	4.0556		gi|76058057|emb|CAJ31108.1| nerve hemoglobin [Spisula solidissima] nerve hemoglobin [Spisula solidissima]
sw11604	990	901	1.1225	1464	1499	0.9297	1537	1172	1.3785	1554	808	2.0104		gi|62639756|ref|XP_574450.1| PREDICTED: sphingosine kinase 2 (predicted) [Rattus norvegicus] Sphingosine kinase 2 (predicted) [Rattus norvegicus] sphingosine kinase 2 (predicted) [Rattus norvegicus]
sw11617	983	802	1.4249	1067	1332	0.8856	824	1538	0.5436	1456	868	2.1218		gi|55627028|ref|XP_518625.1| PREDICTED: zinc finger protein 292 [Pan troglodytes]
sw11619	2025	2333	0.8343	1972	2894	0.6607	4899	3223	1.8438	6033	1285	4.619		gi|87248319|gb|ABD36212.1| ecdysteroid-regulated 16 kDa protein precursor [Bombyx mori]
sw11624	299	531	0.67	451	459	1.1396	773	475	2.1034	1680	446	4.3475		gi|68367284|ref|XP_707274.1| PREDICTED: similar to sphingomyelin phosphodiesterase 1, acid lysosomal isoform 2 precursor isoform 3 [Danio rerio]
sw11625	820	991	0.9614	1009	1310	0.8541	813	1128	0.7633	1302	814	2.0514		gi|62858795|ref|NP_001017069.1| solute carrier family 25 (mitochondrial oxodicarboxylate carrier), member 21 [Xenopus tropicalis]
sw11637	117	131		256	198		1020	295	4.1283	984	289	5.9247		gi|20334294|dbj|BAB91145.1| beta-glucosidase [Neotermes koshunensis]
sw11643	436	701	0.7053	510	450	1.3694	218	553	0.5618	230	913	0.3635		gi|5764409|gb|AAD51291.1| DGP-1 protein [Drosophila melanogaster]
sw11655	4269	2306	1.6506	3792	2950	1.2329	3567	1666	2.7838	2056	2118	0.9463		gi|25013142|gb|AAN71684.1| SD18148p [Drosophila melanogaster]
sw11658	1785	1074	1.8931	3976	3094	1.3114	4473	5980	0.8384	18115	381	49.1698		gi|50732812|ref|XP_418776.1| PREDICTED: similar to chromosome 7 open reading frame 24 [Gallus gallus]
sw11659	2737	2138	1.1593	4406	3475	1.2066	4914	4223	1.4458	6397	1734	3.8127		gi|61886357|ref|XP_612280.1| PREDICTED: similar to N-acetylneuraminic acid phosphate synthase isoform 1 [Bos taurus]
sw11689	4898	5719	0.7899	5074	5004	0.9416	3644	5266	0.734	1536	5496	0.3309		gi|567106|gb|AAC41563.1| RNA binding protein RNA binding protein
sw11692	774	1072	0.6862	570	829	0.6397	596	858	0.729	342	1122	0.3746		gi|66513264|ref|XP_392851.2| PREDICTED: similar to GA17793-PA [Apis mellifera]
sw11729	12884	7709	1.5381	13821	12876	1.1719	10774	12861	0.9399	7450	15327	0.413		gi|24657611|ref|NP_647899.1| CG15019-PA [Drosophila melanogaster] IP04417p [Drosophila melanogaster] CG15019-PA [Drosophila melanogaster]
sw11732	725	755	1.1943	1225	1121	1.2936	445	953	0.4956	126	1147	0.1486		gi|25396127|pir||A88860 protein ZC518.3 [imported] - Caenorhabditis elegans
sw11733	2354	3194	0.7762	2010	2415	0.9942	3693	3196	1.203	1306	2791	0.4946		gi|47085951|ref|NP_998337.1| cyclin G2 [Danio rerio] Cyclin G2 [Danio rerio]
sw11740	363	509	0.9816	473	450	1.478	550	420	1.4357	872	373	2.8942		gi|68366688|ref|XP_683991.1| PREDICTED: similar to Protein disulfide-isomerase A5 precursor (Protein disulfide isomerase-related protein) [Danio rerio]
sw11744	2075	2410	0.9014	2733	1672	1.9009	2446	1933	1.2237	6874	2108	3.069		gi|72008230|ref|XP_783603.1| PREDICTED: similar to methylmalonate semialdehyde dehydrogenase gene [Strongylocentrotus purpuratus]
sw11748	1130	1043	1.1729	1694	1656	1.1287	1119	744	1.5378	1111	736	2.1046
sw11761	1040	5868	0.1716	6346	1899	3.2642	5891	1914	2.989	12497	925	9.7174		gi|68487061|ref|XP_712591.1| flocculin-like protein [Candida albicans SC5314] flocculin-like protein [Candida albicans SC5314]
sw11765	441	490	1.1927	832	683	1.4977	1534	703	2.2545	1816	523	3.4447
sw11781	1735	1510	1.1351	1539	1694	1.002	1120	1237	0.8925	71	3069	0.0298		gi|7862150|gb|AAF70499.1| 3-dehydroecdysone 3alpha-reductase [Spodoptera littoralis]
sw11789	218	281		424	363	1.5042	1080	512	2.1445	29	241
sw11800	683	923	0.7595	1124	1097	0.9886	535	789	0.7308	122	1012	0.1735		gi|87248451|gb|ABD36278.1| adenylate cyclase [Bombyx mori]
sw11819	1695	1374	1.2698	1368	1040	1.4488	2753	1078	3.1089	5547	1323	4.1638		gi|543860|sp|Q03168|ASPP_AEDAE Lysosomal aspartic protease precursor aspartic protease
sw11824	779	721	1.115	1073	1143	0.941	788	919	0.9291	1457	759	2.1364		gi|2245568|gb|AAB62719.1| alpha-mannosidase II [Spodoptera frugiperda]
sw11832	2306	1098	2.0259	1200	1203	0.9789	116	325		2269	4484	0.4995		gi|58429859|gb|AAW78325.1| cytochrome P450 family 4 [Chironomus tentans]
sw11835	2767	2314	1.0514	4660	3328	1.4017	6281	3233	2.4931	17529	992	13.5134
sw11846	6383	6532	0.9227	5193	7486	0.6517	1300	3433	0.4776	199	9099	0.0309		gi|24666794|ref|NP_649121.1| CG9290-PA [Drosophila melanogaster] CG9290-PA [Drosophila melanogaster]
sw11858	1880	1681	1.2023	2683	1945	1.4239	4936	2713	1.8451	7115	1160	5.7537		gi|87248603|gb|ABD36354.1| serine hydroxymethyltransferase [Bombyx mori]
sw11860	4863	3575	1.1239	9735	5544	1.5007	2680	2907	0.9872	2148	5789	0.3684		gi|56118919|ref|NP_001008035.1| MGC79554 protein [Xenopus tropicalis] MGC79554 protein [Xenopus tropicalis]
sw11879	5795	5081	0.8835	1752	1816	0.9476	2495	1313	1.9168	867	3492	0.2762		gi|62473099|ref|NP_001014687.1| CG2165-PE, isoform E [Drosophila melanogaster] CG2165-PE, isoform E [Drosophila melanogaster]
sw11883	335	365		341	357		266	287		1221	427	3.6226		gi|27374312|gb|AAO01060.1| ap-PA [Drosophila willistoni]
sw11887	2202	1285	1.4896	2095	2094	0.9722	1808	2475	0.7883	3066	1263	2.503		gi|55241330|gb|EAA08571.2| ENSANGP00000012910 [Anopheles gambiae str. PEST] ENSANGP00000012910 [Anopheles gambiae str. PEST]
sw11888	1971	1439	1.1895	2335	2264	0.8899	1131	1348	0.8401	895	1930	0.4824		gi|30580383|sp|Q9VZE6|BXDC2_DROME Brix domain-containing protein 2 homolog (Ribosome biogenesis protein Brix homolog)
sw11900	1294	92	19.6258	38	102		3302	234	16.2286	17	298			gi|1403598|gb|AAC47136.1| retinol dehydratase
sw11902	21932	23330	0.8149	25810	19857	1.1073	13529	17473	0.87	408	29847	0.0157		gi|3913399|sp|Q24998|CUP52_GALME Pupal cuticle protein PCP52 precursor (GMPCP52) pupal cuticule protein [Galleria mellonella]
sw11925	7538	7201	0.9829	10147	11194	1.0089	11393	12609	1.0172	16964	4915	2.8698		gi|217291|dbj|BAA00639.1| antitrypsin precursor [Bombyx mori] Antitrypsin precursor (AT)
sw11934	1822	1756	1.1262	1897	2036	1.0594	2296	2362	1.1203	3525	1978	2.0023		gi|66562741|ref|XP_623751.1| PREDICTED: similar to calcineurin B [Apis mellifera]
sw11942	1393	1244	1.2111	1141	1455	0.9274	1840	948	2.2742	1477	1383	1.1637		gi|61675679|gb|AAX51655.1| GM02004p [Drosophila melanogaster]
sw11946	170	262		115	256		283	212		1014	334	3.6125		gi|1002986|gb|AAC47015.1| tolloid homolog; Method: conceptual translation supplied by author
sw11957	380	218		679	319	2.7739	2885	436	6.9541	89	217			gi|6164595|gb|AAF04457.1| lacunin [Manduca sexta]
sw11963	6242	5806	0.8686	9413	7259	1.1996	5768	7153	0.8439	585	5591	0.1142		gi|7108595|gb|AAF36489.1| homogentisate 1,2-dioxygenase [Drosophila melanogaster]
sw11964	14685	13334	0.8058	14128	16087	0.6938	5251	17113	0.2893	414	20819	0.013		gi|25012502|gb|AAN71355.1| RE29976p [Drosophila melanogaster]
sw11966	1555	1258	1.3557	1594	1741	0.9558	994	1491	0.667	497	2100	0.2561
sw11981	2912	3030	0.8967	4074	4109	1.0171	2909	3896	0.7515	759	4758	0.1626		gi|66499116|ref|XP_395333.2| PREDICTED: similar to Odorant receptor 83b, partial [Apis mellifera]
sw11982	1700	904	1.8321	1186	1260	1.019	1333	1293	1.1048	67	2345	0.0408		gi|961466|dbj|BAA09850.1| adhesive plaque matrix protein [Mytilus coruscus] Adhesive plaque matrix protein precursor (Foot protein 1) (MCFP1)
sw11999	4433	3836	0.956	2146	1685	1.2172	800	726	1.2448	418	4940	0.0937
sw12011	2870	3030	0.8928	3016	2735	1.1177	2620	3256	0.9346	401	2915	0.1836
sw12023	10712	10967	0.7481	11340	9398	1.1386	7448	8753	0.9971	6514	11223	0.451		gi|3135665|gb|AAC16552.1| putative prenylated protein tyrosine phosphatase PRL-1 [Drosophila melanogaster]
sw12056	2229	2025	0.9726	2069	1644	1.1702	1905	1419	1.4122	10722	1506	10.4321		gi|82895058|ref|XP_919288.1| PREDICTED: similar to Basement membrane-specific heparan sulfate proteoglycan core protein precursor (HSPG) (Perlecan) (PLC) [Mus musculus]
sw12086	3236	2321	1.3793	5466	3624	1.3686	6748	3265	2.2065	11971	1672	7.3289		gi|2738865|gb|AAB94558.1| hemocyte protease-2 [Manduca sexta]
sw12087	318	294		242	319		183	262		1196	226	7.5739		gi|55244216|gb|EAA05763.2| ENSANGP00000018875 [Anopheles gambiae str. PEST] ENSANGP00000018875 [Anopheles gambiae str. PEST]
sw12103	4792	3691	1.2519	6176	3970	1.7865	3859	4559	0.8371	10369	2904	2.4576		gi|55239333|gb|EAA44260.2| ENSANGP00000025275 [Anopheles gambiae str. PEST] ENSANGP00000025275 [Anopheles gambiae str. PEST]
sw12104	14906	17250	0.6767	18018	19594	0.9179	24887	12942	2.1365	10522	16074	0.5088
sw12115	367	652	0.7701	275	437	0.987	1764	497	4.0137	542	532	1.2737		gi|66515313|ref|XP_394771.2| PREDICTED: similar to insulin-like peptide receptor; ILP-R [Apis mellifera]
sw12117	3582	3018	1.2429	5647	4840	1.3231	9369	5371	1.9321	6281	2669	2.1969		gi|87248285|gb|ABD36195.1| carboxylesterase [Bombyx mori]
sw12138	870	903	1.1213	850	1264	0.835	811	1029	0.8966	2773	587	4.8897
sw12146	357	916	0.4811	306	979	0.3504	217	366		1272	506	2.9265
sw12154	1303	1335	1.078	1269	1109	1.2664	2028	1797	1.2503	129	1084	0.1614		gi|66546886|ref|XP_392978.2| PREDICTED: similar to A disintegrin and metalloproteinase with thrombospondin motifs like [Apis mellifera]
sw12156	1674	2108	0.7713	2034	2608	0.7643	3125	3479	0.8318	5524	1159	4.8162		gi|67464485|pdb|1YIZ|B Chain B, Aedes Aegypti Kynurenine Aminotrasferase Chain A, Aedes Aegypti Kynurenine Aminotrasferase
sw12171	35	141		267	1291	0.2302	37	177		16	199			gi|5815245|gb|AAD52614.1| SANT domain protein SMRTER [Drosophila melanogaster]
sw12174	411	1570	0.3271	368	1469	0.3318	154	434	0.5023	281	419	1.0187		gi|6815279|gb|AAF28474.1| V-ATPase 110 kDa integral membrane subunit [Manduca sexta]
sw12183	1726	1555	1.035	2103	1823	1.1137	1313	1759	0.7967	3235	1371	2.6962		gi|72009505|ref|XP_784851.1| PREDICTED: similar to L-threonine aldolase [Strongylocentrotus purpuratus]
sw12197	2055	2298	0.9289	3363	3247	1.042	3557	2898	1.2223	7449	1089	8.4376
sw12205	356	415	1.1646	649	908	0.8328	509	2198	0.2166	25	387			gi|55236096|gb|EAA14443.2| ENSANGP00000014836 [Anopheles gambiae str. PEST] ENSANGP00000014836 [Anopheles gambiae str. PEST]
sw12206	56087	50970	0.8065	72970	54671	1.2501	15890	47832	0.4019	4785	57701	0.0759		gi|47605413|sp|Q7M4F3|CUD2_SCHGR Endocuticle structural glycoprotein SgAbd-2
sw12224	122	222		174	321		3385	382	7.0421	391	216
sw12244	6517	4083	1.2981	9188	4834	1.6386	7778	4382	1.9109	22582	3209	8.9992		gi|73967590|ref|XP_857927.1| PREDICTED: similar to sarcosine dehydrogenase isoform 3 [Canis familiaris]
sw12248	4975	3210	1.2967	2074	2750	0.665	1031	2308	0.4868	246	3948	0.0584		gi|57914803|ref|XP_555244.1| ENSANGP00000027403 [Anopheles gambiae str. PEST] ENSANGP00000027403 [Anopheles gambiae str. PEST]
sw12263	3120	2930	0.8971	2627	2655	0.9467	2288	2366	1.024	1256	2909	0.4658
sw12265	814	912	0.9417	1048	979	1.1813	851	663	1.4457	1611	746	2.3994		gi|85701297|sp|Q503W7|ATD1B_BRARE ATPase family AAA domain-containing protein 1-B
sw12271	223	252		854	688	1.3341	3919	934	3.9944	2093	544	4.4472		gi|33989989|gb|AAH56253.1| Chromosome 6 open reading frame 71 [Homo sapiens]
sw12282	287	985	0.3828	262	702	0.4539	230	373		257	562	0.7199		gi|2117117|emb|CAA69649.1| neurotransmitter transporter [Drosophila melanogaster]
sw12315	7131	6269	1.0893	9980	9906	1.0445	9588	10768	0.903	19899	5534	3.0629		gi|27805722|sp|Q8WWX9|SELM_HUMAN Selenoprotein M precursor (Protein SelM)
sw12330	2075	100	19.3017	11	102		818	148	8.5478	8	117			gi|83003071|ref|XP_622041.2| PREDICTED: similar to DIPB protein [Mus musculus]
sw12335	7487	4841	1.2942	9431	9987	0.9559	4754	2633	1.8058	20259	7589	2.0751		gi|55245618|gb|EAL41836.1| ENSANGP00000027947 [Anopheles gambiae str. PEST] ENSANGP00000027947 [Anopheles gambiae str. PEST]
sw12337	5317	2004	2.6822	34241	12322	2.411	57091	17248	3.4529	57726	577	54.7334		gi|134925|sp|P09179|SSP1_BOMMO Sex-specific storage-protein 1 precursor (SP 1) (Methionine-rich storage protein)
sw12338	7862	6131	1.1254	8554	7726	1.0398	7222	8386	0.9058	371	7480	0.0488
sw12339	2202	2200	0.9198	1985	1770	1.1371	1474	1523	0.9776	864	1887	0.4994
sw12347	10651	6307	1.3202	12522	9825	1.1595	16279	7621	2.0187	38287	2444	15.111		gi|13548667|dbj|BAB40804.1| cathepsin B [Bombyx mori]
sw12355	571	3232	0.1202	462	3108	0.1504	354	1342	0.3705	396	620	0.8227		gi|38257679|sp|Q8TB36|GDAP1_HUMAN Ganglioside-induced differentiation-associated protein 1 (GDAP1) ganglioside-induced differentiation associated protein 1 [Homo sapiens] ganglioside-induced differentiation-associated protein 1 [Homo sapiens]
sw12394	4188	4776	0.8156	4890	4089	1.2149	5024	3555	1.6068	156	2256	0.1093		gi|66514272|ref|XP_392492.2| PREDICTED: similar to acetylcholinesterase, partial [Apis mellifera]
sw12404	1815	1493	1.1497	2695	1629	1.6034	2090	1410	1.5343	251	1826	0.1825		gi|73988285|ref|XP_534038.2| PREDICTED: similar to tripartite motif-containing 3 isoform 1 [Canis familiaris]
sw12422	809	1435	0.6341	797	956	0.9941	825	1253	0.8233	2300	1275	2.1542		gi|55243805|gb|EAA06499.2| ENSANGP00000017373 [Anopheles gambiae str. PEST] ENSANGP00000017373 [Anopheles gambiae str. PEST]
sw12437	383	564	0.8534	519	790	0.7676	533	670	0.8801	3074	381	7.7573		gi|89039345|gb|ABD60146.1| adipokinetic hormone receptor [Anopheles gambiae]
sw12447	780	656	1.1871	1126	885	1.3094	1846	1483	1.4119	1627	553	3.4958		gi|73971430|ref|XP_538746.2| PREDICTED: similar to N-acetylneuraminic acid phosphate synthase isoform 1 [Canis familiaris]
sw12457	11154	14048	0.688	13438	8998	1.3343	12053	6261	1.895	4516	10592	0.4465		gi|87248501|gb|ABD36303.1| glutamate dehydrogenase [Bombyx mori]
sw12479	1704	1761	0.8552	1104	1122	0.9762	1225	1139	1.2187	222	934	0.2939		gi|66517026|ref|XP_623982.1| PREDICTED: similar to ENSANGP00000015329 [Apis mellifera]
sw12493	12687	10113	1.1158	16446	10056	1.6108	19756	7021	2.7872	42032	5272	7.4228
sw12504	3910	4364	0.8679	3442	3300	1.1387	5096	3717	1.353	762	3601	0.2191		gi|40889804|pdb|1URU|A Chain A, Amphiphysin Bar Domain From Drosophila
sw12516	11655	10096	0.9119	11376	12069	0.8342	9189	8723	0.9312	8060	12939	0.4604		gi|21428328|gb|AAM49824.1| AT23067p [Drosophila melanogaster]
sw12517	33304	26176	0.994	36924	37269	1.0091	47538	25573	1.9821	57723	12341	2.2963		gi|28804517|dbj|BAC57964.1| calreticulin [Bombyx mori]
sw12526	599	907	0.8275	555	510	1.4179	410	581	0.8727	137	878	0.2459		gi|1234789|gb|AAC59866.1| fos-related antigen-2
sw12528	1927	1850	1.0444	2547	2407	1.127	2486	2624	0.8863	2452	1301	2.4561		gi|62857489|ref|NP_001017196.1| interferon, gamma-inducible protein 30 [Xenopus tropicalis]
sw12530	3120	2601	1.192	3443	2979	1.1641	830	2306	0.3142	1027	1658	0.653		gi|77403869|gb|ABA81813.1| RE74861p [Drosophila melanogaster]
sw12532	1294	1457	0.892	2370	1785	1.2448	945	1289	0.6817	348	1088	0.3521		gi|11907986|gb|AAG41424.1| fry [Drosophila melanogaster]
sw12534	1471	1516	1.0538	1732	2184	0.8046	1395	2094	0.6604	265	1919	0.1589		gi|55241087|gb|EAL40600.1| ENSANGP00000027190 [Anopheles gambiae str. PEST] ENSANGP00000027190 [Anopheles gambiae str. PEST]
sw12550	2765	1997	1.3102	3436	4100	0.814	3544	4113	0.8776	16965	1760	8.1352		gi|33285891|gb|AAQ01563.1| promoting protein [Bombyx mori]
sw12552	1062	937	1.096	1304	982	1.2479	3957	1462	2.4663	420	1488	0.3177
sw12555	2959	1737	1.5531	2888	1941	1.4916	3244	582	4.7296	6211	3403	1.6462		gi|2058460|gb|AAB53258.1| p270 [Bombyx mori]
sw12561	904	613	1.5829	866	798	1.2967	937	509	2.1672	891	822	1.1937		gi|55242633|gb|EAA07387.2| ENSANGP00000000807 [Anopheles gambiae str. PEST] ENSANGP00000000807 [Anopheles gambiae str. PEST]
sw12568	51	101		166	262		908	259	3.9183	189	148			gi|24642059|ref|NP_572987.1| CG9503-PA [Drosophila melanogaster] CG9503-PA [Drosophila melanogaster]
sw12577	1099	1390	0.8815	1602	2601	0.6554	1227	1442	0.8916	186	1027	0.2243
sw12600	2149	1773	1.123	4920	3765	1.1967	4870	4112	1.3132	16313	1365	12.5141		gi|28573299|ref|NP_610332.3| CG8791-PA [Drosophila melanogaster] LP07366p [Drosophila melanogaster] CG8791-PA [Drosophila melanogaster]
sw12606	3870	4449	0.8613	4772	6565	0.7295	4041	4669	0.9503	706	4261	0.1892		gi|32766335|gb|AAH55155.1| Similar to aldehyde dehydrogenase 4 family, member A1 [Danio rerio] zgc:63592 [Danio rerio] Delta-1-pyrroline-5-carboxylate dehydrogenase, mitochondrial precursor (P5C dehydrogenase) (Aldehyde dehydrogenase 4A1)
sw12613	3435	4642	0.7079	4638	3575	1.3147	1643	2317	0.8069	386	2482	0.2256		gi|34867519|ref|XP_213676.2| PREDICTED: similar to Ubiquitin specific protease 16 [Rattus norvegicus]
sw12615	2408	2259	0.9655	2016	1750	1.144	1882	1465	1.5945	5631	1818	3.1691		gi|27807501|ref|NP_777206.1| pyruvate dehydrogenase phosphatase regulatory subunit precursor [Bos taurus] pyruvate dehydrogenase phosphatase regulatory subunit precursor; PDPr [Bos taurus]
sw12646	134	309		147	325		158	248		807	237	3.899		gi|5901826|gb|AAD55421.1| BcDNA.GH06717 [Drosophila melanogaster]
sw12651	1555	1448	0.9721	840	1337	0.6411	468	1348	0.4105	68	1220	0.0975		gi|76496246|gb|ABA43639.1| L-threonine dehydrogenase [Bombyx mori]
sw12656	10961	7266	1.0886	14544	12176	0.96	8855	10957	0.8948	1756	12619	0.0987		gi|34100932|gb|AAQ57578.1| troponin C 25D [Drosophila subobscura]
sw12672	301	251		330	266		308	306		1401	302	6.2618		gi|50730416|ref|XP_416893.1| PREDICTED: similar to lipoyltransferase 1 [Gallus gallus]
sw12681	31796	25002	1.0306	40218	38665	1.0297	43402	33048	1.2106	13029	29370	0.4546		gi|51243015|gb|AAT99314.1| profilin [Bombyx mori] Profilin
sw12688	1470	1999	0.8005	850	1798	0.6018	832	2301	0.3149	7129	1196	4.9084		gi|17861638|gb|AAL39296.1| GH16993p [Drosophila melanogaster]
sw12689	1735	2890	0.6445	2309	3278	0.8436	1924	2713	0.7032	58	1591	0.0656
sw12713	4733	3235	1.4773	8313	15184	0.6051	7434	21608	0.3074	31144	1319	13.4456
sw12736	3190	3343	0.8607	3892	2009	1.7168	1059	1777	0.5553	156	1738	0.0938
sw12756	1422	2292	0.5818	2528	2055	1.1397	557	1213	0.4859	171	2044	0.1029
sw12759	1340	1130	1.1541	1888	1508	1.2114	1562	1407	1.2192	4190	890	5.5336		gi|61608458|gb|AAX47080.1| UDP-glucose pyrophosphorylase [Aedes aegypti]
sw12764	104	186		126	257		170	250		838	184	6.0493		gi|68375175|ref|XP_698601.1| PREDICTED: similar to Matrix metalloproteinase-17 precursor (MMP-17) (Membrane-type matrix metalloproteinase 4) (MT-MMP 4) (Membrane-type-4 matrix metalloproteinase) (MT4-MMP) [Danio rerio]
sw12780	2737	2444	1.0179	4244	5184	0.7253	1882	1960	1.0036	23265	1323	14.6049
sw12783	203	287		543	406	1.7243	403	307	1.7861	1534	451	3.9957		gi|53687092|ref|ZP_00106689.2| COG0458: Carbamoylphosphate synthase large subunit (split gene in MJ) [Nostoc punctiforme PCC 73102]
sw12797	281	284		432	573	0.954	335	550	0.72	1202	377	5.1636		gi|66509122|ref|XP_394574.2| PREDICTED: similar to CG11594-PA, isoform A [Apis mellifera]
sw12799	1617	1085	1.419	1464	1574	0.9712	1882	1155	2.1502	1675	1500	1.0866
sw12823	1481	1435	0.9197	1877	1552	1.1806	1753	1440	1.3787	2845	1524	2.0072		gi|28569894|dbj|BAC57926.1| reverse transcriptase [Bombyx mori]
sw12852	2945	2679	0.8734	2640	3474	0.67	2056	3437	0.6317	1350	3114	0.432		gi|54639112|gb|EAL28514.1| GA11301-PA [Drosophila pseudoobscura]
sw12868	1103	1397	0.9103	1465	961	1.9792	1362	1056	1.2596	4951	1379	3.0935		gi|54637264|gb|EAL26667.1| GA20896-PA [Drosophila pseudoobscura]
sw12871	5504	5440	0.9491	6302	7927	0.8843	8988	7290	1.151	16756	3203	3.2551		gi|58394158|ref|XP_320560.2| ENSANGP00000015331 [Anopheles gambiae str. PEST] ENSANGP00000015331 [Anopheles gambiae str. PEST]
sw12874	700	1069	0.8106	570	849	0.9665	970	1180	0.8294	110	977	0.1891		gi|72146987|ref|XP_794216.1| PREDICTED: similar to acyltransferase 3 family (5C22) [Strongylocentrotus purpuratus]
sw12879	4124	5085	0.7947	5506	6812	0.9145	3147	3653	0.8563	1401	3226	0.4512		gi|13928964|ref|NP_113881.1| synaptotagmin 4 [Rattus norvegicus] Synaptotagmin-4 (Synaptotagmin IV) (SytIV) synaptotagmin IV homolog synaptotagmin IV
sw12898	1263	1309	1.0633	957	645	1.7281	717	408	2.2918	163	1088	0.223		gi|28574239|ref|NP_523587.4| Myosin heavy chain CG17927-PH, isoform H [Drosophila melanogaster] CG17927-PH, isoform H [Drosophila melanogaster]
sw12899	9477	6036	1.2766	7689	4852	1.5977	5886	3264	1.7974	1465	9377	0.124		gi|28574239|ref|NP_523587.4| Myosin heavy chain CG17927-PH, isoform H [Drosophila melanogaster] CG17927-PH, isoform H [Drosophila melanogaster]
sw12902	799	1174	0.8101	1678	1675	1.1089	2004	1495	1.478	4200	736	5.6081		gi|54644089|gb|EAL32831.1| GA10154-PA [Drosophila pseudoobscura]
sw12912	12902	13315	0.7248	15852	12743	1.1158	13799	11449	1.0551	8727	15028	0.4133		gi|24581638|ref|NP_608831.1| CG15431-PA [Drosophila melanogaster] CG15431-PA [Drosophila melanogaster]
sw12917	16931	14994	0.9631	23589	18133	1.1754	22381	16398	1.3708	3137	20931	0.157		gi|24642507|ref|NP_727973.1| CG4239-PB, isoform B [Drosophila melanogaster] CG4239-PA, isoform A [Drosophila melanogaster] CG4239-PC, isoform C [Drosophila melanogaster] GH25683p [Drosophila melanogaster] CG4239-PC, isoform C [Drosophila melanogaster] CG4239-PB, isoform B [Drosophila melanogaster] CG4239-PA, isoform A [Drosophila melanogaster]
sw12918	3069	2822	1.0747	3377	3262	1.0311	4381	2309	2.3513	1039	4367	0.2302		gi|2947219|gb|AAC39645.1| UDP-galactose 4' epimerase [Homo sapiens] UDP-galactose-4-epimerase [Homo sapiens] Chain B, Human Udp-Galactose 4-Epimerase: Accommodation Of Udp-N- Acetylglucosamine Within The Active Site Chain A, Human Udp-Galactose 4-Epimerase: Accommodation Of Udp-N- Acetylglucosamine Within The Active Site UDP galactose 4'-epimerase
sw12919	6936	6394	0.8644	8489	8546	0.9353	5215	10105	0.5676	3523	7578	0.4727		gi|3182995|sp|Q25481|ES16_MANSE Ecdysteroid regulated 16 kDa protein precursor ecdysteroid regulated 16 kDa [Manduca sexta]
sw12936	1366	1199	1.065	1659	1271	1.1949	1115	1029	1.09	201	1565	0.1453
sw12945	4748	5187	0.7954	5562	7928	0.6742	3392	9153	0.3217	356	5411	0.0683		gi|54639109|gb|EAL28511.1| GA15415-PA [Drosophila pseudoobscura]
sw12946	438	466	1.1723	486	544	1.0671	342	384		957	515	2.6341		gi|27819890|gb|AAO24993.1| LP05301p [Drosophila melanogaster]
sw12948	3458	3406	0.8779	4989	7106	0.6395	5781	6928	0.858	11831	2717	3.6011
sw12973	255	308		717	541	1.5666	507	270	2.5079	2336	270	13.6263		gi|5759228|gb|AAD51036.1| cytochrome P450 [Manduca sexta]
sw13002	2061	3544	0.5903	2253	2212	1.075	1986	2189	1.033	279	1742	0.2395		gi|438387|gb|AAA03715.1| alpha-amylase
sw13026	521	518	1.1471	614	732	0.9323	759	584	1.2912	892	311	3.2215
sw13032	6984	6198	0.8439	9016	9429	0.7629	7014	7521	1.0194	27628	3122	6.6268		No hits found
sw13037	9549	11064	0.7549	6511	3106	2.0604	3030	1404	2.1852	1551	17580	0.1075
sw13043	594	436	1.3503	620	726	0.8664	534	988	0.63	2217	447	6.362		gi|85740623|gb|ABC79689.1| glutathione S-transferase 6 [Bombyx mori]
sw13044	4104	3462	0.906	5653	4968	0.9385	1689	3982	0.4449	195	4569	0.0518		gi|6560645|gb|AAF16700.1| juvenile hormone binding protein precursor-like protein [Manduca sexta]
sw13071	3990	4690	0.839	4941	7706	0.7277	3624	7313	0.5113	105	5971	0.0315		gi|70905642|gb|AAZ14281.1| proteophosphoglycan 5 [Leishmania major strain Friedlin] Leishmania major strain Friedlin proteophosphoglycan 5 [Leishmania major strain Friedlin]
sw13072	3487	2916	1.2417	6154	4640	1.472	2130	2441	0.818	126	3415	0.0562
sw13074	3043	2787	1.1282	2936	3146	1.0372	12367	3930	3.9404	518	3403	0.1838
sw13075	14753	19610	0.6555	17965	20657	0.8565	13633	15637	0.8773	30517	12280	2.0491		gi|57033136|gb|AAH88952.1| LOC398231 protein [Xenopus laevis]
sw13084	24877	16999	1.2089	30418	21713	1.4065	23476	26761	0.9322	1323	29480	0.0394
sw13094	132	122		211	306		784	436	2.3214	1754	142	14.3674		gi|58533151|gb|AAW78933.1| trypsin [Anopheles sinensis]
sw13107	17503	9549	1.3505	18458	15655	1.0524	19011	14233	1.3376	2390	12098	0.2004
sw13114	109	423	0.4042	5176	5774	0.8527	5171	1685	4.2143	22	132			gi|1378130|gb|AAC47340.1| serpin 1
sw13123	22008	15700	0.949	33996	20471	1.3238	22969	17648	1.2021	3942	20488	0.1339		gi|66517541|ref|XP_393694.2| PREDICTED: similar to CG32171-PD, isoform D [Apis mellifera]
sw13132	4042	2664	1.276	7893	4211	1.5255	9433	3548	2.4717	851	2825	0.2891		gi|62637998|gb|AAX92638.1| glucose transporter 8 [Solenopsis invicta]
sw13134	4341	5327	0.7556	4939	4532	1.0105	3475	3039	1.1651	1148	8153	0.1306
sw13143	27979	13437	1.5035	41045	20234	1.3793	39788	13264	4.1402	57726	3424	14.8433		gi|2498144|sp|Q25490|APLP_MANSE Apolipophorins precursor [Contains: Apolipophorin-2 (Apolipophorin II) (apoLp-2); Apolipophorin-1 (Apolipophorin I) (apoLp-1)] apolipophorin precursor protein
sw13163	901	954	0.9959	1183	1201	1.0495	683	1043	0.7563	209	1229	0.2539		gi|34100932|gb|AAQ57578.1| troponin C 25D [Drosophila subobscura]
sw13171	205	239		248	288		440	349	1.9426	1591	250	7.4944		gi|57966866|ref|XP_562320.1| ENSANGP00000027535 [Anopheles gambiae str. PEST] ENSANGP00000027535 [Anopheles gambiae str. PEST]
sw13174	1024	1107	1.0387	2330	2303	1.0949	1732	2221	0.893	7236	858	9.3955		gi|87248353|gb|ABD36229.1| macrophage migration inhibitory factor [Bombyx mori]
sw13175	126	171		322	445	0.9089	310	430	1.0725	917	257	4.5977		gi|56378323|dbj|BAD74198.1| heat shock protein hsp23.7 [Bombyx mori]
sw13179	2040	2618	0.6986	2534	2177	1.1934	1360	1820	0.9137	675	1795	0.4121		gi|55640947|ref|XP_510026.1| PREDICTED: similar to Butyrate response factor 1 (TIS11B protein) (EGF-response factor 1) (ERF-1) [Pan troglodytes]
sw13187	1953	1385	1.3135	1694	1572	1.0819	1047	670	2.0669	939	931	1.1063
sw13192	907	855	1.0634	805	1041	0.755	464	779	0.7405	54	926	0.0727		gi|55242783|gb|EAA07249.2| ENSANGP00000016033 [Anopheles gambiae str. PEST] ENSANGP00000016033 [Anopheles gambiae str. PEST]
sw13198	2488	2430	1.0761	2491	2462	1.0549	2028	1448	1.5317	16165	2048	7.905		gi|68565080|sp|Q9U943|APLP_LOCMI Apolipophorins precursor [Contains: Apolipophorin-2 (Apolipophorin II) (apoLp-2); Apolipophorin-1 (Apolipophorin I) (apoLp-1)] apolipophorin precursor protein [Locusta migratoria]
sw13208	8972	12117	0.5295	7804	5025	1.3299	1408	2069	0.7305	771	13268	0.0453		gi|6560689|gb|AAF16722.1| putative cuticle protein [Manduca sexta]
sw13219	52265	26309	1.1311	77558	32998	1.8594	39892	33455	1.3932	6845	46807	0.1122		gi|56684881|gb|AAW22542.1| myosin light chain [Gryllotalpa orientalis]
sw13224	7060	4617	1.1591	9464	8702	0.8815	7668	8833	0.9532	24033	3184	5.6892		gi|3868784|dbj|BAA34219.1| MBF2 [Samia cynthia]
sw13226	711	767	1.0261	1025	1407	0.7665	411	1826	0.2718	122	778	0.2057
sw13231	884	587	1.4435	1264	921	1.4346	810	905	0.9825	130	924	0.2257		gi|72153584|ref|XP_791349.1| PREDICTED: similar to transposase (4S113) [Strongylocentrotus purpuratus]
sw13235	8272	5758	1.07	7474	7496	0.8914	8203	8066	1.0961	19051	2861	6.5765		gi|66533332|ref|XP_625023.1| PREDICTED: similar to ARMET-like protein precursor [Apis mellifera]
sw13255	6501	5759	1.0323	5981	6884	0.9764	7922	7482	1.0043	10663	3393	2.1392		gi|55236041|gb|EAA14245.3| ENSANGP00000015679 [Anopheles gambiae str. PEST] ENSANGP00000015679 [Anopheles gambiae str. PEST]
sw13270	2903	4179	0.6874	3181	2753	1.2828	1464	3546	0.4412	29	3966	0.0118		gi|3676298|gb|AAC61893.1| membrane transporter [Bactrocera tryoni]
sw13277	15219	24865	0.4965	20368	47544	0.4747	18344	25544	0.8375	16598	19493	0.6693		gi|87248641|gb|ABD36373.1| vacuolar ATP synthase subunit G [Bombyx mori]
sw13296	952	1058	0.9585	647	884	0.8484	1009	992	1.014	403	975	0.478		gi|54642720|gb|EAL31465.1| GA13601-PA [Drosophila pseudoobscura]
sw13305	7714	6394	1.1061	11663	7346	1.5069	17106	7593	2.2534	5556	6086	0.8208		gi|4761288|gb|AAD29306.1| innexin-2 [Schistocerca americana] Innexin inx2 (Innexin-2) (G-Inx2)
sw13316	5194	3457	1.2275	4194	3453	1.048	7894	2140	3.3476	5927	3879	1.3142		gi|72049979|ref|XP_788813.1| PREDICTED: similar to Ribosome-binding protein 1 (Ribosome receptor protein) (180 kDa ribosome receptor homolog) (ES/130 related protein), partial [Strongylocentrotus purpuratus]
sw13341	204	305		317	487	0.8935	586	640	0.9894	1014	404	2.903		gi|386223|gb|AAB27158.1| Kallmann syndrome gene product [chickens, embryo, Peptide, 675 aa] Anosmin-1 precursor (Kallmann syndrome protein homolog)
sw13350	16474	11380	1.2123	21170	20389	0.9775	7089	16095	0.5139	690	24942	0.0325		gi|85857724|gb|ABC86397.1| IP09958p [Drosophila melanogaster]
sw13351	15565	15210	0.8456	14750	12285	1.1136	2683	10421	0.2852	488	17598	0.0356		gi|3913392|sp|O02388|CU22_BOMMO Larval cuticle protein LCP-22 precursor LCP22 [Bombyx mori]
sw13371	6782	7912	0.6841	4477	5091	0.8502	1590	5507	0.3139	410	9431	0.0461		gi|3913391|sp|O02387|CU17_BOMMO Larval cuticle protein LCP-17 precursor LCP17 [Bombyx mori]
sw13391	2414	1651	1.3426	5330	3293	1.5661	6335	8116	0.9437	67	1075	0.0773		gi|77415706|emb|CAJ01522.1| hypothetical protein [Anopheles gambiae] putative sensory appendage protein SAP-2 [Anopheles gambiae] ENSANGP00000011748 [Anopheles gambiae str. PEST] ENSANGP00000011748 [Anopheles gambiae str. PEST]
sw13392	17240	8428	1.5184	34015	15612	1.8854	25739	19911	1.3996	389	12446	0.0194		gi|26007526|gb|AAF71290.2| chemosensory protein [Mamestra brassicae]
sw13395	4010	3667	0.8842	5249	5442	0.8957	5319	5148	1.2011	8530	2343	3.4882		gi|30908840|gb|AAP37003.1| microsomal glutathione transferase GSTMIC1 [Anopheles gambiae] ENSANGP00000029649 [Anopheles gambiae str. PEST] ENSANGP00000029649 [Anopheles gambiae str. PEST]
sw13400	4663	4430	0.8482	4505	4385	0.8769	3713	3894	1.0308	1271	4816	0.2649		gi|55242045|gb|EAA08136.3| ENSANGP00000010852 [Anopheles gambiae str. PEST] ENSANGP00000010852 [Anopheles gambiae str. PEST]
sw13402	2609	2130	1.2831	4271	3904	1.1135	3416	3838	0.9807	6268	1555	3.8209		gi|55639729|ref|XP_509632.1| PREDICTED: dolichyl phosphate glucosyltransferase [Pan troglodytes]
sw13419	1228	886	1.2862	1232	1163	1.0858	474	1206	0.4619	8426	320	26.6967
sw13446	347	478	1.0328	488	547	1.3563	1018	428	2.4311	1192	415	3.1763
sw13451	357	758	0.677	543	494	1.7666	115	202		12	1412	0.0304		gi|66530060|ref|XP_625151.1| PREDICTED: similar to takeout like protein [Apis mellifera]
sw13452	11924	13495	0.7195	13954	16377	0.865	16325	13873	1.2434	22149	7683	2.0454		gi|55235521|gb|EAA14690.3| ENSANGP00000016786 [Anopheles gambiae str. PEST] ENSANGP00000016786 [Anopheles gambiae str. PEST]
sw13471	899	1010	1.0777	1440	1610	1.0882	1359	2348	0.6118	4789	988	4.7175		gi|56541153|gb|AAH87520.1| LOC496168 protein [Xenopus laevis]
sw13473	430	539	1.0485	849	971	1.1019	827	860	0.9453	96	1001	0.1569		gi|85857612|gb|ABC86341.1| IP14124p [Drosophila melanogaster]
sw13477	3856	5069	0.7188	3805	4113	1.0464	5606	3955	1.4083	642	3556	0.1974		gi|12002996|gb|AAG43431.1| filamin isoform A [Drosophila melanogaster]
sw13479	2419	2916	0.7837	2232	3465	0.7066	2548	2583	1.0313	11797	2053	5.2293		gi|5901826|gb|AAD55421.1| BcDNA.GH06717 [Drosophila melanogaster]
sw13482	5018	6549	0.7783	4578	7080	0.664	2915	10992	0.2307	186	8356	0.0296		gi|74038580|dbj|BAE43824.1| tyrosine hydroxylase [Papilio xuthus]
sw13499	1642	1221	1.2894	2484	1840	1.3438	3215	2799	1.1536	398	2233	0.1957		gi|38679389|gb|AAR26516.1| antennal esterase [Mamestra brassicae]
sw13503	827	860	0.9744	986	726	1.483	1917	786	2.2496	958	734	1.4441		gi|47522760|ref|NP_999131.1| long-chain 3-ketoacyl-CoA thiolase [Sus scrofa] long-chain 3-ketoacyl-CoA thiolase [Sus scrofa]
sw13504	20522	11117	1.3441	31645	19089	1.1631	31964	14586	1.9571	45373	3426	11.3465		gi|48112268|ref|XP_393146.1| PREDICTED: similar to CG14984-PA [Apis mellifera]
sw13534	2943	2448	1.1684	3812	3871	0.9965	3039	2950	1.2391	6721	1947	4.1203		gi|62643542|ref|XP_342259.2| PREDICTED: similar to major facilitator superfamily domain containing 1 [Rattus norvegicus]
sw13546	5554	188	33.2049	11	113		3093	145	25.7315	13	605	0.0889		gi|6525240|gb|AAF15366.1| ring-infested erythrocyte surface antigen [Plasmodium falciparum]
sw13559	4573	4390	0.8689	4572	4268	1.0505	1667	2822	0.6958	358	3315	0.1242		gi|49245876|emb|CAG44357.1| putative cell wall-anchored protein [Staphylococcus aureus subsp. aureus MSSA476] putative cell wall-anchored protein [Staphylococcus aureus subsp. aureus MSSA476]
sw13622	1791	1406	1.3309	1849	1656	1.0782	1852	827	2.354	1545	1384	1.352		gi|72085257|ref|XP_796113.1| PREDICTED: similar to cytochrome P450, family 2, subfamily U, polypeptide 1 [Strongylocentrotus purpuratus]
sw13623	1614	1925	0.7427	1603	1663	0.9327	1664	2315	0.7997	2008	903	2.5978		gi|21358223|ref|NP_649696.1| CG31248-PA [Drosophila melanogaster] GH28833p [Drosophila melanogaster] CG31248-PA [Drosophila melanogaster]
sw13636	2059	2909	0.7298	2163	2401	1.0654	2564	4803	0.4915	12128	1484	6.2785		gi|10441010|gb|AAG16902.1| acyl-CoA desaturase [Bombyx mori]
sw13640	613	499	1.7333	664	657	1.4248	1254	875	1.4268	1492	247	6.8793		gi|55647901|ref|XP_524042.1| PREDICTED: similar to transmembrane serine protease 9; polyserase 1 [Pan troglodytes]
sw13647	1428	1168	1.4303	2127	2177	1.2474	1495	2228	0.6966	97	2233	0.0822
sw13648	774	985	0.9649	981	1285	0.9917	1994	2217	0.8433	2646	649	3.8518
sw13656	744	952	0.934	652	889	0.8872	649	837	0.7965	81	1039	0.1155		gi|62656738|ref|XP_573172.1| PREDICTED: peanut-like 2 (Drosophila) (predicted) [Rattus norvegicus]
sw13658	2612	2219	1.2457	2939	2792	1.172	3491	2358	1.7617	11721	1868	6.6118		gi|55238805|gb|EAA11739.2| ENSANGP00000010726 [Anopheles gambiae str. PEST] ENSANGP00000010726 [Anopheles gambiae str. PEST]
sw13664	41	147		261	253		985	170	6.3495	15	147
sw13690	6803	5331	1.1405	8449	7245	1.1033	6419	5993	1.178	15470	3858	3.5165
sw13698	1195	1243	1.0044	1273	1262	1.0797	762	986	0.8624	172	1054	0.2322		gi|57526849|ref|NP_001009623.1| tumor necrosis factor (ligand) superfamily, member 13 (predicted) [Rattus norvegicus] Tumor necrosis factor (ligand) superfamily, member 13 (predicted) [Rattus norvegicus]
sw13733	584	1043	0.6662	671	1565	0.4876	457	809	0.6067	584	790	0.95		gi|66513715|ref|XP_395242.2| PREDICTED: similar to exocyst complex component 8 [Apis mellifera]
sw13737	305	389		800	900	1.0152	1684	1582	1.1118	4585	327	21.3896		gi|1923274|gb|AAC47506.1| Tpr homolog [Drosophila melanogaster]
sw13738	2694	2432	1.0998	3611	3401	1.0731	1874	2552	0.8266	1520	3911	0.4504		gi|87248499|gb|ABD36302.1| gaba receptor protein [Bombyx mori]
sw13753	342	359		1004	1231	0.9187	1952	1705	1.2304	4816	316	25.1577		gi|24649778|ref|NP_651285.1| CG13634-PA [Drosophila melanogaster] CG13634-PA [Drosophila melanogaster]
sw13786	814	1089	0.8593	1177	888	1.4513	1001	690	1.4834	1520	645	2.657		gi|25012444|gb|AAN71328.1| RE22749p [Drosophila melanogaster]
sw13805	429	814	0.6102	489	543	1.0846	587	882	0.7819	943	500	2.2475		gi|55665006|emb|CAH72310.1| AU RNA binding protein\/enoyl-Coenzyme A hydratase [Homo sapiens] AU RNA binding protein\/enoyl-Coenzyme A hydratase [Homo sapiens] AU RNA binding protein\/enoyl-Coenzyme A hydratase [Homo sapiens] AU RNA-binding protein/enoyl-Coenzyme A hydratase precursor [Homo sapiens] Methylglutaconyl-CoA hydratase, mitochondrial precursor (AU-specific RNA-binding enoyl-CoA hydrata…
sw13846	2399	2050	1.2484	3612	2701	1.4778	5072	2688	2.2821	16761	1052	17.0787		gi|17298113|dbj|BAB78525.1| fibrillin-like protein [Bombyx mori]
sw13847	2918	2163	1.4356	5257	4479	1.2872	12979	6739	1.9796	21092	3848	4.5959		gi|1346474|sp|P48816|LYS_BOMMO Lysozyme precursor (1,4-beta-N-acetylmuramidase) lysozyme [Bombyx mori]
sw13865	2939	2582	1.1762	2863	3137	1.0474	2035	2335	0.8149	734	2303	0.3435		gi|72038871|ref|XP_791989.1| PREDICTED: similar to Dual specificity protein phosphatase 3 (T-DSP11) [Strongylocentrotus purpuratus]
sw13871	71	171		326	179		1572	354	4.7431	8	182			gi|89243290|gb|ABD64806.1| Dvir_CG31992 [Drosophila virilis]
sw13879	454	452	1.1412	411	532	0.9922	395	399		1137	434	2.9451		gi|66515488|ref|XP_394777.2| PREDICTED: similar to ENSANGP00000015561 [Apis mellifera]
sw13888	1304	915	1.4688	735	706	1.097	820	506	1.536	190	1151	0.1855		gi|66514031|ref|XP_623655.1| PREDICTED: similar to plasma membrane calcium ATPase PMCA3, partial [Apis mellifera]
sw13889	3599	3637	0.9021	3464	3633	0.9931	3841	3896	0.9925	396	3640	0.1177		gi|15149556|dbj|BAB62875.1| junctophilin [Drosophila melanogaster]
sw13891	6178	6226	0.7295	5899	4480	1.2216	4879	5249	0.9459	616	7042	0.0729
sw13897	412	442	1.1505	805	801	1.1644	539	626	0.8903	429	1076	0.491		gi|4433540|gb|AAD20805.1| 5-aminolevulinate synthase [Limulus polyphemus]
sw13900	1890	1829	0.9308	2343	2661	0.7982	1118	4758	0.2321	377	2158	0.1818		gi|41618334|tpg|DAA03106.1| TPA: TPA_inf: HDC11369 [Drosophila melanogaster] CG33290-PA [Drosophila melanogaster] CG33290-PA [Drosophila melanogaster]
sw13903	1013	453	2.5518	433	496	1.0563	662	1098	0.7308	171	265
sw13905	8	47		2	58		1757	129	23.5203	0	81			gi|20799483|gb|AAM28515.1| acyl-CoA desaturase SexiVPAE [Spodoptera exigua]
sw13907	3326	4550	0.5868	18752	6132	2.1853	57080	3016	28.629	108	4746	0.027
sw13950	4053	2700	1.5649	4345	4349	1.0309	3299	3238	1.1042	767	4001	0.2188		gi|55243720|gb|EAA06365.2| ENSANGP00000008152 [Anopheles gambiae str. PEST] ENSANGP00000008152 [Anopheles gambiae str. PEST]
sw13964	1302	1236	1.0117	1461	1117	1.3086	1550	1740	0.9848	1726	1094	2.2544		gi|66564941|ref|XP_396130.2| PREDICTED: similar to Phosphoserine phosphatase (predicted) [Apis mellifera]
sw13973	74	177		380	199		1420	181	6.1746	5	179			gi|2114495|gb|AAC97125.1| UDP-glucose dehydrogenase [Drosophila melanogaster]
sw13985	16850	13557	1.0281	28339	23278	1.0041	24712	26362	0.9436	314	16191	0.0291		gi|6560645|gb|AAF16700.1| juvenile hormone binding protein precursor-like protein [Manduca sexta]
sw13989	265	290		315	409	0.9883	967	403	2.6482	26	372			gi|72013918|ref|XP_784086.1| PREDICTED: similar to mucin 19 [Strongylocentrotus purpuratus]
sw13994	34058	23059	1.1983	50710	34946	1.121	33963	24526	1.4113	5915	44631	0.1138		gi|7321108|emb|CAA09938.2| tropomyosin [Chironomus kiiensis] Tropomyosin (Allergen Chi k 10)
sw13995	27853	15684	1.1067	37052	24151	1.2449	25195	20667	1.3892	4022	27171	0.1238		gi|85164|pir||A28449 tropomyosin, cytoskeletal - fruit fly (Drosophila melanogaster) tropomyosin II non-muscle isoform
sw13999	3035	2254	1.1367	3035	2903	0.9951	2331	2570	0.9661	11960	1629	6.4739		gi|66546678|ref|XP_395658.2| PREDICTED: similar to GA16920-PA [Apis mellifera]
sw14005	1784	2330	0.7167	1751	1384	1.2849	1535	2495	0.7	471	1934	0.3481		gi|77415582|emb|CAJ01460.1| hypothetical protein [Bombyx mori]
sw14021	424	405	1.3863	552	521	1.5127	1007	451	2.6541	789	523	2.0305
sw14028	89	752	0.1781	66	939	0.1326	75	389		108	302			gi|66521047|ref|XP_396250.2| PREDICTED: similar to ENSANGP00000009437, partial [Apis mellifera]
sw14039	15	72		46	91		806	206	4.9433	5	90			gi|24642035|ref|NP_572976.1| CG12539-PA [Drosophila melanogaster] RE49901p [Drosophila melanogaster] CG12539-PA [Drosophila melanogaster]
sw14040	1713	1561	1.2104	3271	3559	0.9915	2773	3077	0.8882	5112	1814	2.7285		gi|76639590|ref|XP_580699.2| PREDICTED: similar to Beta-ureidopropionase (Beta-alanine synthase) (N-carbamoyl-beta-alanine amidohydrolase) (BUP-1) [Bos taurus]
sw14050	2128	4707	0.5057	1712	7328	0.288	664	2054	0.3334	703	3753	0.2172
sw14063	630	683	1.055	710	841	1.0482	691	1083	0.7523	1485	611	2.678
sw14071	37813	21803	1.1426	52164	36437	1.1958	40026	30455	1.3372	6761	41489	0.1517		gi|78101803|tpg|DAA05519.1| TPA: TPA_inf: troponin I isoform 6a1 [Apis mellifera]
sw14074	3834	4071	0.8883	6132	5571	1.0598	6066	5775	1.1503	8456	2498	3.1264		gi|13775331|gb|AAK39152.1| Protein disulfide isomerase protein 2, isoform a [Caenorhabditis elegans] Protein Disulfide Isomerase family member (pdi-2) [Caenorhabditis elegans] Protein disulfide-isomerase 2 precursor (PDI 1) (Prolyl 4-hydroxylase beta subunit)
sw14090	1011	2028	0.55	525	1325	0.4909	599	816	0.8407	217	1151	0.2579		gi|50754818|ref|XP_414516.1| PREDICTED: similar to Solute carrier family 23, (nucleobase transporters) member 2 [Gallus gallus]
sw14094	3803	3485	1.0098	4807	4261	1.0464	5776	5109	1.1469	7840	3233	2.0651
sw14107	994	978	1.0111	1142	825	1.3854	972	557	2.045	276	1356	0.2624		gi|66516775|ref|XP_391818.2| PREDICTED: similar to CG4491-PA [Apis mellifera]
sw14108	1340	1573	0.8297	1352	1200	1.0715	1930	1279	1.5807	170	1596	0.1348
sw14113	699	794	1.0527	717	759	1.0987	490	409	1.464	1092	660	2.2023
sw14127	512	380	1.6674	750	603	1.4515	722	650	1.3393	827	487	2.1532		gi|76155807|gb|AAX27080.2| SJCHGC02359 protein [Schistosoma japonicum]
sw14136	4647	3576	1.0895	6815	5984	1.0126	5762	6349	1.0557	10465	3178	3.1079		gi|72015727|ref|XP_784509.1| PREDICTED: similar to transmembrane emp24 protein transport domain containing 4 [Strongylocentrotus purpuratus]
sw14145	1190	950	1.3596	1808	1455	1.3377	1152	1206	1.1014	216	1447	0.2562		gi|66526756|ref|XP_394944.2| PREDICTED: similar to ENSANGP00000006981 [Apis mellifera]
sw14147	649	715	0.9839	376	532	0.8152	792	684	1.5057	2359	533	5.3177		gi|157804|gb|AAA28664.1| laminin B2 chain
sw14151	7200	8980	0.6462	8009	9418	0.7591	8267	10208	0.988	21443	3508	5.7899		gi|6691133|gb|AAF24501.1| SP295 [Drosophila melanogaster]
sw14161	2671	2594	0.9825	3291	4240	0.7657	2581	2854	0.9505	8750	2137	3.5413		gi|28316979|gb|AAO39510.1| RE36610p [Drosophila melanogaster]
sw14162	2063	2564	0.8467	1879	1470	1.3257	2559	959	2.4805	3256	1696	1.937		gi|34042969|gb|AAQ56702.1| UDP-GalNAc:polypeptide N-acetylgalactosaminyltransferase; PGANT5 [Drosophila melanogaster]
sw14169	826	1221	0.7748	1133	1458	0.8332	1186	1622	0.7868	1702	743	2.4582
sw14196	484	396	1.2657	894	652	1.2551	769	448	1.9729	919	360	3.5829		gi|76827797|gb|AAI06880.1| STRN protein [Homo sapiens]
sw14209	1510	1435	1.1592	2351	3002	0.9342	1906	1011	2.0147	3295	2781	1.3258		gi|83814188|ref|YP_445391.1| aldehyde reductase [Salinibacter ruber DSM 13855] aldehyde reductase [Salinibacter ruber DSM 13855]
sw14215	3331	3756	0.9024	3640	5543	0.7745	4926	7123	0.6886	11946	3587	2.2109		gi|12002054|gb|AAG43169.1| transaldolase [Rattus norvegicus] Transaldolase
sw14216	1974	1689	1.3115	1143	1735	0.8249	3461	1234	2.8921	2071	2137	0.9305
sw14220	726	809	1.1458	517	726	1.0127	1025	534	2.0414	640	1346	0.5548
sw14222	183	359		198	286		873	367	2.4717	97	296			gi|38677997|emb|CAC83074.1| alpha-1,6-mannosyl-glycoprotein beta-1,2-N-acetylglucosaminyltransferase [Drosophila melanogaster]
sw14228	2330	1643	1.5578	2287	2468	1.0198	2848	2735	1.0204	3687	1625	2.2552		gi|37360086|dbj|BAC98021.1| mKIAA0776 protein [Mus musculus]
sw14229	2232	2030	1.2168	2201	2796	0.9406	2060	2569	0.7985	5261	2281	2.2013		No hits found
sw14252	619	586	1.271	2045	1050	2.3588	240	372		46	632	0.0935		gi|72008030|ref|XP_781892.1| PREDICTED: similar to Zinc finger MYND domain containing protein 10 (BLu protein) [Strongylocentrotus purpuratus]
sw14253	1868	1845	1.0885	2107	1993	1.2279	3029	1621	1.8707	12327	1152	7.1755		gi|55244645|gb|EAA05197.3| ENSANGP00000017954 [Anopheles gambiae str. PEST] ENSANGP00000017954 [Anopheles gambiae str. PEST]
sw14255	1194	1841	0.6695	2037	1488	1.4832	502	1099	0.5616	127	1009	0.1514
sw14266	648	1057	0.7228	779	803	1.1125	985	731	1.6107	4930	547	9.4997		gi|89268884|emb|CAJ81498.1| novel protein containing acetyltransferase domain [Xenopus tropicalis]
sw14293	590	953	0.6798	682	928	0.8622	644	767	0.8746	11	885	0.0396		gi|54637590|gb|EAL26992.1| GA19958-PA [Drosophila pseudoobscura]
sw14294	3120	2580	1.1686	4893	4397	1.1151	5475	3855	1.7889	16474	2669	7.1204		gi|89305900|gb|EAS03888.1| Viral A-type inclusion protein repeat containing protein [Tetrahymena thermophila SB210]
sw14298	3367	6043	0.5039	4593	3932	1.1762	4262	4629	1.0953	1513	4426	0.3451		gi|76619775|ref|XP_871614.1| PREDICTED: similar to Transmembrane protein 33 (DB83 protein) [Bos taurus]
sw14309	580	806	0.8735	1095	1121	1.0814	1340	1025	1.4508	3903	841	5.8782		gi|16877801|gb|AAH17135.1| Glycine decarboxylase [Mus musculus] glycine decarboxylase [Mus musculus] Glycine dehydrogenase [decarboxylating], mitochondrial precursor (Glycine decarboxylase) (Glycine cleavage system P-protein)
sw14310	1576	1741	0.9385	2225	3130	0.6925	5589	3819	1.6677	61	1992	0.0549		No hits found
sw14311	474	953	0.5115	345	429	1.0405	86	252		17	1063	0.0485		gi|24416622|dbj|BAC22502.1| putative pheromone-degrading enzyme [Antheraea polyphemus]
sw14312	26572	19829	0.996	40187	28742	1.0628	23070	21757	1.124	57716	6538	6.634		gi|11995033|dbj|BAB20042.1| SPARC [Artemia franciscana]
sw14315	3317	2337	1.4041	2951	3065	0.9575	2823	1582	2.1435	2206	2162	1.1225		gi|23512303|gb|AAH38402.1| ARP5 actin-related protein 5 homolog [Homo sapiens] ARP5 actin-related protein 5 homolog [Homo sapiens]
sw14330	362	585	0.7675	772	636	1.4644	660	474	1.5958	875	335	3.755		gi|607947|gb|AAA62207.1| prolyl 4-hydroxylase alpha subunit
sw14331	6384	3604	1.4499	10811	10012	1.0128	12451	10879	1.369	32225	1343	16.946		gi|400673|sp|P31420|OMBP_MANSE Ommochrome-binding protein precursor (OBP) (YCP) ommochrome-binding protein
sw14354	4606	13009	0.3273	5900	11016	0.5146	5585	7796	0.8376	4596	6265	0.7157		gi|87248183|gb|ABD36144.1| vacuolar ATPase subunit C [Bombyx mori]
sw14397	2014	3431	0.5403	1721	3693	0.4871	1895	2303	0.9046	2223	1997	1.1714		gi|87248269|gb|ABD36187.1| vacuolar ATP synthase 21 kDa proteolipid subunit [Bombyx mori]
sw14399	2015	1204	1.4673	1137	1268	0.8788	2396	1032	2.6095	1881	1792	1.1214		gi|57971628|ref|XP_564702.1| ENSANGP00000026412 [Anopheles gambiae str. PEST] ENSANGP00000026412 [Anopheles gambiae str. PEST]
sw14400	17362	9265	1.2692	23449	4515	3.5864	14067	2788	5.5897	598	12980	0.0434
sw14420	342	545	0.8569	169	322		561	346	1.807	825	420	2.4241		gi|28317200|gb|AAD27851.2| GM01838p [Drosophila melanogaster]
sw14431	10203	8936	1.0519	15321	11593	1.3331	15391	13697	1.1353	362	13005	0.0393		gi|48427980|sp|P82120|CUO7_BLACR Cuticle protein 7 (BcNCP15.0)
sw14438	10663	12968	0.7954	15341	8736	1.4748	14658	7653	1.8548	19371	6177	2.4792		gi|66513983|ref|XP_396131.2| PREDICTED: similar to aspartate aminotransferase [Apis mellifera]
sw14440	2016	992	2.3462	1615	1503	1.2017	1784	1192	1.4826	1896	1321	1.8179
sw14444	820	1061	0.8117	414	389	1.4637	908	309	3.2603	366	605	0.7809
sw14453	1815	1411	1.3885	2090	2557	0.89	2336	3015	0.7301	3834	1688	2.0417		gi|89268880|emb|CAJ83733.1| trafficking protein particle complex 5 [Xenopus tropicalis]
sw14467	8209	6921	0.8749	9122	8999	0.8854	6810	8612	0.8099	12465	4949	2.1342		gi|76639219|ref|XP_593308.2| PREDICTED: similar to Protein KIAA0152 precursor [Bos taurus]
sw14489	252	299		273	555	0.6632	94	338		1151	303	4.4686		gi|37591031|dbj|BAC98835.1| juvenile hormone acid methyltransferase [Bombyx mori]
sw14507	781	516	1.7703	793	787	1.1173	500	822	0.7157	3686	1119	3.4304		gi|37496575|emb|CAD82836.1| calcitonin-like receptor precursor [Crassostrea gigas] calcitonin-related receptor precursor - eastern oyster
sw14516	1728	1545	1.0568	1976	1171	1.6793	1766	1344	1.3797	262	1330	0.2776		gi|28317101|gb|AAO39569.1| LP02021p [Drosophila melanogaster]
sw14543	203	1105	0.2051	2058	1521	1.3704	148	301		374	266
sw14545	1161	1226	1.0137	2815	2520	1.0717	1571	2133	0.7933	960	328	3.5176		gi|72114829|ref|XP_785120.1| PREDICTED: similar to thyroid hormone receptor interactor 13 (predicted) [Strongylocentrotus purpuratus]
sw14555	3242	2820	0.9602	3713	3071	1.1396	2524	3048	0.9395	1082	4245	0.2818		gi|68144076|gb|AAY86076.1| diapause bioclock protein [Bombyx mori]
sw14604	56089	31194	1.2862	84710	62288	1.2324	57091	49096	1.3115	11047	57675	0.1483		gi|48141152|ref|XP_393544.1| PREDICTED: similar to myosin 1 light chain [Apis mellifera]
sw14619	8029	9434	0.7949	7541	6468	1.2416	7306	6147	1.2213	4322	10068	0.4453		gi|24644712|ref|NP_649688.1| CG1105-PA [Drosophila melanogaster] LD44267p [Drosophila melanogaster] CG1105-PA [Drosophila melanogaster]
sw14620	862	722	1.4859	673	727	1.1606	1046	622	1.671	325	940	0.4296		gi|4582984|gb|AAD24886.1| D-Axin [Drosophila melanogaster]
sw14624	806	796	1.2443	1346	1470	1.045	1052	1276	0.8138	354	1026	0.4226		No hits found
sw14628	56085	30320	1.3	84713	33977	2.103	56302	37771	1.2375	6095	54905	0.0526
sw14629	10646	8557	1.1115	7667	6205	1.3409	7511	5887	1.2647	408	21540	0.0217
sw14631	901	678	1.4639	1453	1102	1.483	2235	1572	1.4733	7742	595	13.7477		gi|47522956|ref|NP_999236.1| acylneuraminate lyase [Sus scrofa] acylneuraminate lyase [Sus scrofa]
sw14637	5302	4487	1.142	7759	7879	1.0746	7321	10397	0.6654	25512	3779	3.8994		gi|66564529|ref|XP_623716.1| PREDICTED: similar to Ribonuclease UK114 (14.5 kDa translational inhibitor protein) (p14.5) (UK114 antigen homolog) [Apis mellifera]
sw14648	1202	1400	0.8663	1906	1807	1.0177	3025	1369	1.9929	3358	946	3.6945		gi|2575865|dbj|BAA23126.1| BmP109 [Bombyx mori]
sw14659	633	806	0.7539	383	737	0.6013	313	526	0.8121	96	832	0.1596		gi|72120626|ref|XP_791295.1| PREDICTED: similar to Neural cell adhesion molecule 1, 140 kDa isoform precursor (N-CAM 140) (NCAM-140) [Strongylocentrotus purpuratus]
sw14680	1022	749	1.4146	1200	885	1.2932	959	454	2.289	904	777	1.2943		gi|6634121|emb|CAB64385.1| BAB-I protein [Drosophila melanogaster]
sw14683	2850	1875	1.392	2016	1638	1.1857	2724	1460	2.1313	749	3040	0.2783
sw14697	2299	2924	0.8024	2125	3058	0.723	1530	2798	0.5169	1416	3140	0.4466		gi|58396568|ref|XP_321994.2| ENSANGP00000012114 [Anopheles gambiae str. PEST] ENSANGP00000012114 [Anopheles gambiae str. PEST]
sw14699	858	1167	0.7506	434	528	0.9979	1153	911	1.5044	1114	651	2.0775		gi|66540209|ref|XP_624722.1| PREDICTED: similar to Zgc:92093 [Apis mellifera]
sw14703	2611	2269	1.1274	3079	2753	1.1346	2555	2969	1.0013	4986	1933	2.5781		gi|18859921|ref|NP_573044.1| CG7872-PA [Drosophila melanogaster] LD24870p [Drosophila melanogaster] CG7872-PA [Drosophila melanogaster]
sw14704	693	594	1.2289	767	754	1.0691	1010	541	2.4077	1192	775	1.7619
sw14709	1605	1785	1.0302	1887	2842	0.691	1834	2873	0.6756	8215	1025	10.4253		gi|72062727|ref|XP_798116.1| PREDICTED: similar to Galactokinase (Galactose kinase) [Strongylocentrotus purpuratus]
sw14711	2066	2274	0.8176	1598	2255	0.7175	1048	2078	0.5965	1394	2990	0.4513
sw14740	1816	1667	0.9858	1708	1770	0.8916	1638	1697	1.0253	311	1476	0.2439		gi|47086073|ref|NP_998413.1| ADP-ribosylation factor-like 7 [Danio rerio] ADP-ribosylation factor-like 7 [Danio rerio]
sw14742	3078	2398	1.3236	2696	1698	1.653	1060	1628	0.7163	154	3063	0.0737		gi|66499360|ref|XP_396507.2| PREDICTED: similar to CG11550-PA [Apis mellifera]
sw14753	4036	2970	1.2543	4438	2665	1.6529	1880	1422	1.3936	444	1958	0.3067		gi|89266800|emb|CAJ83990.1| PHD finger protein 8 [Xenopus tropicalis]
sw14759	3712	3814	0.8017	3127	2388	1.2619	2858	2504	1.1978	1828	3779	0.4918		gi|3249057|gb|AAC24042.1| casein kinase II beta subunit [Spodoptera frugiperda] Casein kinase II beta subunit (CK II beta)
sw14766	723	3822	0.2331	34	116		19	358		41	1432	0.0424		gi|66394784|gb|AAY46199.1| peritrophic membrane chitin binding protein [Trichoplusia ni]
sw14771	1390	1996	0.6236	1474	1097	1.3567	526	1069	0.5721	257	1371	0.2149		gi|73999885|ref|XP_535448.2| PREDICTED: similar to tumor protein p53 binding protein, 1 isoform 1 [Canis familiaris]
sw14775	168	208		186	1099	0.1572	73	155		32	236			gi|24584084|ref|NP_609635.1| CG15639-PA [Drosophila melanogaster] CG15639-PA [Drosophila melanogaster]
sw14783	743	592	1.1962	803	746	1.1047	683	851	0.9328	2580	364	9.3147		gi|56118552|ref|NP_001007992.1| hpgd-prov protein [Xenopus tropicalis] Hpgd-prov protein [Xenopus tropicalis]
sw14791	2671	2687	1.0535	2547	2822	1.1254	1596	1643	0.9786	2420	5077	0.4324		gi|5901872|gb|AAD55444.1| BcDNA.GM05306 [Drosophila melanogaster]
sw14793	10604	23176	0.4426	10318	26559	0.4606	15288	15525	0.9044	12611	12548	1.0252		gi|53148473|dbj|BAD52264.1| vacuolar ATP synthethase subunit E [Plutella xylostella]
sw14804	981	1282	0.8676	1746	1893	1.0314	1965	791	2.3611	853	764	1.3108		gi|535032|emb|CAA50574.1| peroxisomal acyl-CoA oxidase [Homo sapiens] acyl-CoA oxidase (EC 1.3.3.6), peroxisomal - human
sw14808	8109	9409	0.7585	11377	7537	1.6034	12476	6144	2.028	5672	6284	0.8026		gi|2076896|gb|AAB53985.1| Malate dehydrogenase protein 1 [Caenorhabditis elegans] Malate DeHydrogenase family member (mdh-1) [Caenorhabditis elegans] Probable malate dehydrogenase, mitochondrial precursor
sw14813	1485	1215	1.4352	3202	2090	1.7617	4587	3084	1.5705	12563	799	14.5566		gi|73961121|ref|XP_547433.2| PREDICTED: similar to N-acetylneuraminate pyruvate lyase [Canis familiaris]
sw14847	146	221		109	218		868	246	3.7333	29	209			gi|66504141|ref|XP_624454.1| PREDICTED: similar to RE14504p [Apis mellifera]
sw14857	1479	1765	0.8499	1655	2144	0.8572	1386	1911	0.7163	588	2299	0.2808
sw14859	29	94		45	113		7227	218	22.0106	28	112			gi|50756561|ref|XP_415214.1| PREDICTED: similar to spondin [Gallus gallus]
sw14860	5765	4351	1.0668	7511	7190	0.887	8268	5879	1.3448	22652	2333	9.1144		gi|66555674|ref|XP_623670.1| PREDICTED: similar to Lysosomal Pro-X carboxypeptidase precursor (Prolylcarboxypeptidase) (PRCP) (Proline carboxypeptidase) (Angiotensinase C) (Lysosomal carboxypeptidase C) [Apis mellifera]
sw14878	4318	2886	1.4207	6731	5717	1.1632	6912	4848	1.8004	21985	1569	17.7483		gi|63029689|gb|AAY27740.1| salivary/fat body serine carboxypeptidase [Sitodiplosis mosellana]
sw14879	12316	10103	0.8984	13933	11095	0.9943	6533	9343	0.807	461	20523	0.0216		gi|505621|gb|AAA21588.1| high affinity nuclear juvenile hormone binding protein
sw14881	421	537	1.0208	440	641	0.837	386	560	0.7882	1197	439	3.9223		gi|24021171|gb|AAN40976.1| luciferase [Hotaria tsushimana]
sw14882	326	405	1.018	473	524	1.1156	3546	971	4.1084	43	284			gi|55242208|gb|EAL40896.1| ENSANGP00000027230 [Anopheles gambiae str. PEST] ENSANGP00000012173 [Anopheles gambiae str. PEST] ENSANGP00000027230 [Anopheles gambiae str. PEST] ENSANGP00000012173 [Anopheles gambiae str. PEST]
sw14883	3988	4022	0.915	3626	3301	1.0979	3596	3675	1.1557	159	4212	0.0566		gi|66499088|ref|XP_624151.1| PREDICTED: similar to ENSANGP00000012173 [Apis mellifera]
sw14895	282	354		251	391		1013	544	2.2929	2387	261	10.2883		gi|2498144|sp|Q25490|APLP_MANSE Apolipophorins precursor [Contains: Apolipophorin-2 (Apolipophorin II) (apoLp-2); Apolipophorin-1 (Apolipophorin I) (apoLp-1)] apolipophorin precursor protein
sw14898	874	968	1.031	1745	2056	0.9296	1096	1806	0.7315	5911	1158	5.619		gi|68697263|emb|CAJ14156.1| predicted protein [Anopheles gambiae]
sw14909	6004	9882	0.5902	7734	6934	1.1534	4511	5001	0.9881	614	4498	0.1294
sw14912	2792	2238	1.1195	11616	7912	1.2984	18058	10895	1.8141	29752	955	33.1708		gi|77415578|emb|CAJ01458.1| hypothetical protein [Bombyx mori]
sw14913	12910	20117	0.547	5031	41211	0.1008	847	15285	0.056	501	20876	0.0294		gi|24415096|gb|AAN59784.1| antennal-specific protein 3c precursor [Apis mellifera] antennal-specific protein 3c precursor [Apis mellifera]
sw14915	848	1434	0.5804	765	737	1.1451	1285	681	2.5114	909	735	1.4335		gi|83423461|dbj|BAE54254.1| transitional endoplasmic reticulum ATPase TER94 [Bombyx mori]
sw14929	932	1179	0.8817	475	941	0.6088	227	471	0.6516	187	858	0.3679		gi|1764109|gb|AAC64661.1| pacifastin light chain precursor [Pacifastacus leniusculus]
sw14933	860	1111	0.8765	1145	1381	0.8825	843	1679	0.5738	3245	789	4.0019
sw14949	948	1334	0.7424	841	1179	0.7694	576	1045	0.6503	635	1680	0.485		gi|89273996|emb|CAJ81644.1| novel protein [Xenopus tropicalis] nin one binding protein [Xenopus tropicalis]
sw14951	6531	6607	0.7523	6636	7045	0.8426	6150	7482	0.9153	1242	6838	0.1857		gi|55237664|gb|EAA12766.2| ENSANGP00000012400 [Anopheles gambiae str. PEST] ENSANGP00000012400 [Anopheles gambiae str. PEST]
sw14977	285	396		394	977	0.6388	259	639	0.4706	2612	403	7.5068		gi|24641999|ref|NP_572967.1| CG5321-PA [Drosophila melanogaster] CG5321-PA [Drosophila melanogaster]
sw14978	152	292		94	193		185	252		803	286	3.3758		gi|2381492|dbj|BAA22151.1| DN-cadherin [Drosophila melanogaster]
sw15024	529	545	1.1832	449	578	0.9744	751	553	1.4119	1151	580	2.9546		gi|72014368|ref|XP_784741.1| PREDICTED: similar to Putative alpha-mannosidase C1orf22 [Strongylocentrotus purpuratus]
sw15045	543	574	1.1073	1836	1118	1.7174	362	458	0.8641	68	1062	0.0957		gi|17224425|gb|AAL36972.1| phosphorylase kinase gamma [Homo sapiens] Phosphorylase kinase, gamma 1 (muscle) [Homo sapiens] Phosphorylase kinase, gamma 1 (muscle) [Homo sapiens] phosphorylase kinase, gamma 1 (muscle) [Homo sapiens] unknown [Homo sapiens] phosphorylase kinase [Homo sapiens] Phosphorylase kinase, gamma 1 (muscle) [Homo sapiens] Phosphorylase kinase, gamma 1 (muscle) [Homo sapiens] P…
sw15089	3155	3164	1.0659	4907	5533	0.9054	4304	5446	0.8624	11757	2437	5.2727		gi|47523746|ref|NP_999508.1| quinoid dihydropteridine reductase [Sus scrofa] quinoid dihydropteridine reductase [Sus scrofa] Dihydropteridine reductase (HDHPR) (Quinoid dihydropteridine reductase)
sw15095	1114	887	1.2588	555	1284	0.4623	178	512	0.5002	48	573	0.1827		gi|1857602|gb|AAB88068.1| cuticle protein ACP65A [Drosophila melanogaster]
sw15096	1327	1132	1.1483	661	1493	0.4197	355	801	0.5898	21	1080	0.0453
sw15098	3182	4204	0.752	2733	3371	0.8525	1515	2943	0.6189	190	4735	0.0498
sw15116	142	153		563	306	2.3189	1199	379	3.3558	6082	381	35.1474		gi|57158231|dbj|BAD84176.1| cytochrome P450 [Hodotermopsis sjoestedti]
sw15120	2987	1942	1.3559	2443	2201	1.0193	3222	1385	2.3649	1112	2381	0.5131		gi|66548413|ref|XP_392682.2| PREDICTED: similar to C-terminal binding protein (CtBP protein) (dCtBP) [Apis mellifera]
sw15125	4495	2860	1.3663	7851	3331	1.9486	3518	1590	2.018	2834	1941	1.4868		gi|55246515|gb|EAL42084.1| ENSANGP00000025790 [Anopheles gambiae str. PEST] ENSANGP00000025790 [Anopheles gambiae str. PEST]
sw15127	14865	13471	0.7716	15914	14324	0.9868	11632	16733	0.8307	1629	12836	0.1279
sw15130	1776	1985	0.9592	1911	1764	1.1062	1535	733	2.024	1528	1656	0.9991		gi|72117010|ref|XP_789655.1| PREDICTED: similar to acyl-Coenzyme A dehydrogenase, very long chain [Strongylocentrotus purpuratus]
sw15134	283	292		1269	807	1.7412	6274	1586	3.6265	4400	224	20.0785		gi|72164767|ref|XP_796773.1| PREDICTED: similar to fucosidase, alpha-L- 2, plasma [Strongylocentrotus purpuratus]
sw15150	1361	1432	1.0069	1311	1224	1.149	995	604	1.5851	659	1421	0.4945		gi|28302209|gb|AAH46714.1| TCERG1 protein [Xenopus laevis]
sw15174	32263	25124	1.0497	55982	36067	1.4544	57097	33268	1.8461	1053	37879	0.0341		gi|77415572|emb|CAJ01455.1| hypothetical protein [Bombyx mori]
sw15184	491	496	1.4119	695	1049	0.8981	1563	1792	0.8126	4392	370	10.5666		gi|944979|dbj|BAA07421.1| argininosuccinate lyase [Rana catesbeiana] Argininosuccinate lyase (Arginosuccinase) (ASAL)
sw15185	141	305		26	124		1589	266	6.42	6	172			gi|87248445|gb|ABD36275.1| yellow protein [Bombyx mori]
sw15202	1318	2028	0.7308	1798	1272	1.5128	666	1262	0.5805	278	1492	0.2474		gi|55244872|gb|EAA05272.2| ENSANGP00000008377 [Anopheles gambiae str. PEST] ENSANGP00000008377 [Anopheles gambiae str. PEST]
sw15209	93	198		155	170		1774	621	3.0427	4	143			gi|66499088|ref|XP_624151.1| PREDICTED: similar to ENSANGP00000012173 [Apis mellifera]
sw15222	10342	9383	0.9236	11872	10800	1.0057	10675	9215	1.3007	17861	4439	3.4772		gi|1293640|gb|AAA98668.1| protein kinase C substrate 80K-H [Homo sapiens] p90, 80K-H=tyrosine-phosphorylated protein/FGF signaling protein [human, MRC-5 bFGF-stimulated fibroblast cells, Peptide, 527 aa] Glucosidase II beta subunit precursor (Protein kinase C substrate, 60.1 kDa protein, heavy chain) (PKCSH) (80K-H protein) 80K-H protein
sw15238	6836	5997	0.994	5957	7069	0.7811	3529	6004	0.5991	769	6138	0.1249		No hits found
sw15247	1090	1125	0.8876	1502	1505	1.038	1358	972	1.4628	3256	508	7.7675		gi|68392758|ref|XP_694946.1| PREDICTED: similar to ATP-dependent Clp protease ATP-binding subunit ClpX-like, mitochondrial precursor [Danio rerio]
sw15248	1750	874	1.8526	1902	1193	1.4283	2142	715	2.8669	3833	949	4.7722		gi|118112|sp|P28517|CYPR_CALVI Peptidyl-prolyl cis-trans isomerase, rhodopsin-specific isozyme precursor (PPIase) (Rotamase)
sw15253	363	444	0.9911	381	331		875	417	2.5785	277	412	0.9373		gi|27374205|gb|AAN87277.1| vlc [Drosophila virilis]
sw15269	1385	1139	1.3482	3653	3081	1.1873	4197	3550	1.1642	12365	890	17.9127		gi|74268328|gb|AAI02475.1| Argininosuccinate synthetase [Bos taurus] argininosuccinate synthetase [Bos taurus] Argininosuccinate synthase (Citrulline--aspartate ligase) argininosuccinate synthetase
sw15289	1828	2563	0.8013	2125	2635	0.8647	2703	2508	1.1653	836	1960	0.482		gi|87248455|gb|ABD36280.1| annexin isoform 2 [Bombyx mori]
sw15294	613	2079	0.3087	1467	2220	0.7213	1151	1882	0.7346	272	800	0.5005		gi|89290411|gb|EAR88399.1| Bifunctional endo-1,4-beta-xylanase xylA precursor, putative [Tetrahymena thermophila SB210]
sw15296	479	497	1.0745	642	860	0.7507	873	992	0.9905	1762	658	3.5989		gi|87248225|gb|ABD36165.1| short-chain dehydrogenease/reductase [Bombyx mori]
sw15321	659	891	0.8747	913	1113	0.8901	1499	618	2.1848	701	807	1.0859		gi|72042937|ref|XP_797781.1| PREDICTED: similar to UDP-glucuronosyltransferase 2A1 precursor, microsomal [Strongylocentrotus purpuratus]
sw15330	772	630	1.3225	1271	1198	1.1395	4103	2107	1.8318	4920	584	8.2374		gi|33991772|gb|AAH56590.1| Selenium binding protein 1 [Danio rerio] selenium binding protein 1 [Danio rerio]
sw15346	1886	1347	1.4523	2110	1809	1.1167	2486	2626	0.9885	2275	1065	2.5473		gi|14041150|emb|CAC38761.1| leukotriene B4 [Geodia cydonium]
sw15353	6572	4320	1.2479	7196	6454	1.047	7111	7510	0.9893	227	6133	0.0661		gi|4105501|gb|AAD02435.1| multiple inositol polyphosphate phosphatase 2; MIPP2 [Drosophila melanogaster]
sw15372	284	527	0.7812	380	494	1.1773	1079	698	1.5781	2045	354	5.924		gi|66511554|ref|XP_393207.2| PREDICTED: similar to glucocerebrosidase precursor [Apis mellifera]
sw15385	1955	1796	1.2244	2289	2556	1.063	4322	2519	1.7991	5405	1350	3.8938
sw15395	2320	1768	1.2701	1840	1678	1.2005	4089	1649	2.4475	3369	1899	1.6677		gi|50978924|ref|NP_001003179.1| ribosome receptor [Canis familiaris] Ribosome-binding protein 1 (180 kDa ribosome receptor) (RRp) ribosome receptor [Canis familiaris]
sw15396	2849	5308	0.4354	1834	2292	0.8392	551	1316	0.4036	37	4363	0.0051		No hits found
sw15412	944	835	1.1806	1373	986	1.3551	1159	922	1.1553	3050	792	4.1257		gi|62630205|gb|AAX88950.1| unknown [Homo sapiens]
sw15426	1965	3693	0.5459	2102	3862	0.5678	3090	1444	2.2029	1793	3436	0.5095		gi|87248401|gb|ABD36253.1| sericotropin [Bombyx mori]
sw15429	82	1315	0.1012	15	783	0.0757	8	550	0.0649	5	310			gi|54644247|gb|EAL32988.1| GA17385-PA [Drosophila pseudoobscura]
sw15432	1110	1383	0.76	1277	1373	0.8859	994	1001	1.0116	318	1094	0.3518		gi|66526767|ref|XP_393136.2| PREDICTED: similar to ENSANGP00000013077 [Apis mellifera]
sw15436	905	1933	0.4461	1003	1941	0.5156	456	840	0.6068	2229	915	2.9444
sw15439	768	1103	0.626	538	554	1.1374	2164	1216	1.7525	75	859	0.1256		gi|6407382|dbj|BAA86851.1| aldo-keto reductase AKR1C12 [Mus musculus]
sw15450	2363	1973	1.1903	3277	2752	1.2233	2084	2403	1.018	11265	1654	8.4388		gi|1763547|gb|AAB39739.1| integrin beta G subunit [Strongylocentrotus purpuratus] integrin beta G subunit [Strongylocentrotus purpuratus]
sw15474	1962	1955	1.0693	3798	3311	1.2065	3678	4029	0.9989	106	1834	0.0853		gi|1170115|sp|P46430|GSTT1_MANSE Glutathione S-transferase 1 (GST class-theta) glutathione S-transferase
sw15475	835	691	1.2692	1150	1075	1.1612	771	1219	0.7849	1024	587	2.0226
sw15479	11078	8641	0.9856	8739	11720	0.6874	9802	4810	2.6007	17573	7812	1.5932		gi|7576880|gb|AAF64037.1| aquaporin [Aedes aegypti] Aquaporin AQPAe.a
sw15481	10120	7772	1.2293	11600	10497	1.1096	11142	6131	2.0746	10955	8370	1.111		No hits found
sw15491	2029	2325	0.791	1827	1532	1.2042	1010	1121	1.1083	134	2041	0.0676		gi|55243915|gb|EAA06000.2| ENSANGP00000015052 [Anopheles gambiae str. PEST] ENSANGP00000015052 [Anopheles gambiae str. PEST]
sw15492	713	758	0.9674	1319	1009	1.3242	1231	1133	1.1973	888	602	2.3258		gi|11037277|gb|AAG27544.1| BRCT-domain protein MUS101 [Drosophila melanogaster]
sw15503	3083	2510	1.0995	2368	1965	1.1829	2266	2857	0.9407	224	1885	0.12		gi|1934852|emb|CAA73031.1| putative organic cation transporter [Drosophila melanogaster]
sw15506	677	1490	0.5191	1018	2104	0.4784	279	1450	0.2521	3	940	0.0245		gi|22000820|gb|AAM88288.1| cuticle protein 36 [Manduca sexta] Pupal cuticle protein 36 precursor (MsCP36) (MS-PCP36)
sw15509	5699	5444	0.8973	9168	6693	1.1924	8850	9623	0.994	9155	1613	4.8273		gi|54635747|gb|EAL25150.1| GA15651-PA [Drosophila pseudoobscura]
sw15513	789	748	1.1965	660	561	1.2744	955	464	1.9396	2023	767	2.7564		No hits found
sw15534	5489	4555	1.1349	6781	6029	1.0361	5975	8158	0.7816	1186	5562	0.2122		gi|45594226|gb|AAS68504.1| serpin-4B [Manduca sexta]
sw15536	2710	2870	0.7801	3448	3750	0.7686	1594	3644	0.4369	3970	4557	0.7015		gi|6164599|gb|AAF04459.1| dihydrofolate reductase [Heliothis virescens] Dihydrofolate reductase
sw15541	2422	1609	1.378	2550	2680	0.9516	2307	2899	0.8712	356	1426	0.3738		gi|74004324|ref|XP_848389.1| PREDICTED: similar to Glycerol-3-phosphate dehydrogenase, mitochondrial precursor (GPD-M) (GPDH-M) (mtGPD) isoform 2 [Canis familiaris]
sw15564	5713	6534	0.8001	4935	4276	1.2924	4442	4524	0.9648	2282	4846	0.4454
sw15614	2344	2142	1.1272	2406	2781	0.8632	1769	2192	0.8325	424	2050	0.2271		gi|24647970|ref|NP_650726.1| CG10864-PA [Drosophila melanogaster] CG10864-PA [Drosophila melanogaster]
sw15620	50	161		234	272		713	228	3.5538	929	165	9.9141		gi|24667277|ref|NP_649195.1| CG13813-PA [Drosophila melanogaster] IP11764p [Drosophila melanogaster] CG13813-PA [Drosophila melanogaster]
sw15643	5259	4140	1.0421	6187	6296	0.8634	4122	6520	0.7053	19239	4522	3.8651		gi|66557463|ref|XP_395077.2| PREDICTED: similar to pterin 4alpha-carbinolamine dehydratase [Apis mellifera]
sw15650	11404	9949	0.9815	9424	13659	0.6321	1831	9808	0.213	257	15721	0.0218
sw15654	2209	2564	0.8607	3562	3422	1.0498	4783	3471	1.5654	7265	1805	4.0492		gi|87248415|gb|ABD36260.1| tetraspanin D107 [Bombyx mori]
sw15663	21185	19183	0.8992	22302	17320	1.1767	12153	16458	0.8867	4537	17266	0.2537		gi|461860|sp|P21799|CUD4_LOCMI Endocuticle structural glycoprotein ABD-4
sw15681	17468	17701	0.8194	22154	16369	1.2518	14669	9070	1.8997	8033	15879	0.3136		gi|39812378|ref|NP_005484.2| RAN binding protein 9 [Homo sapiens] RAN binding protein 9 [Homo sapiens] RAN binding protein 9 [Homo sapiens] Ran-binding protein 9 (RanBP9) (RanBP7) (Ran-binding protein M) (RanBPM) (BPM90) (BPM-L) RanBPM [Homo sapiens]
sw15682	1695	2376	0.7537	2687	3647	0.7359	2752	2736	1.1178	7511	1313	6.1918		gi|89272476|emb|CAJ83048.1| procollagen-lysine, 2-oxoglutarate 5-dioxygenase 3 [Xenopus tropicalis]
sw15684	606	793	0.7993	665	770	0.8855	933	1117	0.9504	1057	613	2.7545		gi|27261275|gb|AAN87620.1| circumsporozoite protein [Plasmodium falciparum]
sw15689	7095	8045	0.7919	8739	10943	0.7464	5656	6583	0.9799	598	6962	0.104		gi|87248519|gb|ABD36312.1| lectin 4 C-type lectin [Bombyx mori]
sw15691	6623	4838	1.1482	9075	7117	1.1793	3648	8373	0.496	235	4086	0.0485		gi|6560645|gb|AAF16700.1| juvenile hormone binding protein precursor-like protein [Manduca sexta]
sw15703	2134	2079	0.8809	1262	1567	0.8103	1853	1021	2.0769	631	2042	0.3699		gi|40216002|gb|AAL39327.2| GH22839p [Drosophila melanogaster]
sw15711	1109	922	1.1427	1088	1183	0.9434	1200	1558	0.866	1643	850	2.2345		gi|73992280|ref|XP_867233.1| PREDICTED: similar to Dolichol-phosphate mannosyltransferase (Dolichol-phosphate mannose synthase) (Dolichyl-phosphate beta-D-mannosyltransferase) (Mannose-P-dolichol synthase) (MPD synthase) (DPM synthase) isoform 8 [Canis familiaris]
sw15712	605	720	0.8448	480	678	0.7267	349	247		265	989	0.3261		gi|21411063|gb|AAH31132.1| Nucleolar complex associated 3 homolog [Mus musculus] AD24 [Mus musculus] Nucleolar complex protein 3 homolog (NOC3 protein homolog) (NOC3-like protein) (Nucleolar complex-associated protein 3-like protein) (Factor for adipocyte differentiation 24) nucleolar complex associated 3 homolog [Mus musculus]
sw15724	948	713	1.2765	1084	1181	0.8297	802	873	0.9553	1630	897	2.0761		gi|55240899|gb|EAA09193.3| ENSANGP00000003976 [Anopheles gambiae str. PEST] ENSANGP00000003976 [Anopheles gambiae str. PEST]
sw15752	1650	1537	1.2206	2036	2218	1.0948	3115	2709	1.1164	3943	1028	3.4007		gi|73986886|ref|XP_542057.2| PREDICTED: similar to Glucosidase II beta subunit precursor (Protein kinase C substrate, 60.1 kDa protein, heavy chain) (PKCSH) (80K-H protein) [Canis familiaris]
sw15762	763	740	1.2853	1711	1205	1.6549	596	591	1.3133	882	236	5.7782		gi|50749364|ref|XP_421604.1| PREDICTED: similar to Discs, large homolog 5 (Placenta and prostate DLG) (Discs large protein P-dlg) [Gallus gallus]
sw15765	2129	1728	1.388	1198	1486	0.9998	1551	938	1.6596	1306	3576	0.3832		gi|62531297|gb|AAH92594.1| Block of proliferation 1 (predicted) [Rattus norvegicus] block of proliferation 1 (predicted) [Rattus norvegicus]
sw15775	3039	3839	0.82	2409	3792	0.7297	1397	3946	0.3665	137	4095	0.0511		gi|28396158|gb|AAO39756.1| putative antennal carrier protein TOL-2 [Anopheles gambiae]
sw15791	1571	1045	1.5443	1831	1673	1.1992	2559	1571	1.6677	5833	644	9.5276		No hits found
sw15793	2975	2466	1.2182	3091	3086	1.0528	3624	2576	1.3422	14093	2222	4.6641		gi|5733713|gb|AAD49730.1| chrysoptin precursor [Chrysops sp.]
sw15794	872	902	1.1323	1133	867	1.4963	840	591	1.7472	8001	811	9.8227		gi|1705995|sp|P49747|COMP_HUMAN Cartilage oligomeric matrix protein precursor (COMP) cartilage oligomeric matrix protein [Homo sapiens] matrix protein
sw15803	2534	2064	1.1283	2235	1521	1.4623	2228	1644	1.3238	973	2486	0.4272		gi|47271240|gb|AAT27290.1| GH07037p [Drosophila melanogaster] Sterile alpha and TIR motif-containing protein 1 (Tir-1 homolog)
sw15810	6732	6772	0.8743	7093	7938	0.8139	4910	5563	0.8969	3525	7107	0.4188		gi|66551872|ref|XP_396057.2| PREDICTED: similar to polyadenylate binding protein II [Apis mellifera]
sw15812	2798	2455	0.9905	4904	3767	1.1093	4838	3007	1.4955	11574	1475	8.2393		gi|66510279|ref|XP_623263.1| PREDICTED: similar to N-acetylglucosamine 6-sulfatase precursor [Apis mellifera]
sw15825	17444	12675	1.0394	22660	24332	0.8548	14741	24078	0.6021	12044	18868	0.4959		gi|118017|sp|P00037|CYC_SAMCY Cytochrome c
sw15833	1348	1342	1.0141	1868	1688	1.1909	1389	1668	0.7978	515	1568	0.3614		No hits found
sw15836	2394	2388	0.9152	3050	2579	1.0893	2055	1538	1.3946	613	3840	0.1621
sw15839	288	329		405	288	1.7166	810	447	2.1776	239	283
sw15867	743	1084	0.7079	477	921	0.5734	1360	916	1.974	918	512	2.1611		gi|21430660|gb|AAM51008.1| RE55674p [Drosophila melanogaster]
sw15875	1180	196	7.0459	97	284		759	219	5.4575	89	182			gi|27463044|gb|AAO15689.1| Riddle 4 [Xenopus laevis]
sw15879	6857	5960	0.9517	6441	6323	0.9342	3890	5809	0.7911	3852	9401	0.3198		gi|62859003|ref|NP_001017054.1| PAK1 interacting protein 1 [Xenopus tropicalis]
sw15882	1405	2157	0.696	1922	2988	0.6561	947	1204	0.9586	484	3213	0.2039
sw15885	703	1010	0.8035	760	1364	0.5965	387	895	0.4942	31	951	0.1038		gi|24583470|ref|NP_609419.1| CG18301-PA [Drosophila melanogaster] IP12249p [Drosophila melanogaster] CG18301-PA [Drosophila melanogaster]
sw15892	770	933	0.7974	997	861	1.1609	146	257		227	806	0.3594		gi|75677357|ref|NP_001028733.1| PHD finger protein 12 isoform 1 [Homo sapiens] PHD finger protein 12 (PHD factor 1) (Pf1)
sw15906	5571	5925	0.899	6692	6327	0.9689	8620	6593	1.3067	23983	2375	8.7343		No hits found
sw15920	344	442	0.8482	532	614	0.8521	321	504	0.738	1342	341	5.419
sw15971	12213	9101	1.0512	9167	5301	1.7246	11767	4475	2.54	1087	11674	0.0724		gi|89243264|gb|ABD64784.1| Bent [Drosophila virilis]
sw15973	6816	5425	1.1873	6057	5794	1.1524	10352	4611	2.3417	14025	5426	1.6447
sw16006	9963	6375	1.2926	6916	5827	1.0653	6529	3326	1.9885	29952	4509	4.7389		gi|157798|gb|AAA28661.1| laminin A chain
sw16010	1119	782	1.4726	1056	973	1.1836	745	521	1.66	1849	991	2.1386		gi|50732285|ref|XP_418563.1| PREDICTED: similar to adenosine deaminase, RNA-specific, B2; RNA dependent adenosine deaminase 3; adenosine deaminase 3, RNA dependent [Gallus gallus]
sw16021	3954	2641	1.3541	4405	3820	1.1757	3068	2379	1.3158	15626	1996	6.6749		No hits found
sw16035	9880	8436	1.0267	11015	11818	0.8475	8911	11106	0.9595	34838	3594	7.4683		gi|45594226|gb|AAS68504.1| serpin-4B [Manduca sexta]
sw16039	19238	18297	0.8568	28236	20879	1.2268	27337	19641	1.7536	37751	7849	3.6172		gi|66804043|gb|AAY56660.1| Erp60 [Drosophila simulans]
sw16055	1388	1220	1.0933	1238	1452	0.8977	1236	1586	0.9622	3733	1264	2.6512		gi|27706618|ref|XP_231121.1| PREDICTED: similar to Transmembrane protein 15 [Rattus norvegicus]
sw16057	580	491	1.5004	1685	988	2.1387	6583	1015	7.4678	13	377			gi|24665653|ref|NP_730220.1| CG11905-PG, isoform G [Drosophila melanogaster] CG11905-PD, isoform D [Drosophila melanogaster] CG11905-PA, isoform A [Drosophila melanogaster] LD29172p [Drosophila melanogaster] CG11905-PG, isoform G [Drosophila melanogaster] CG11905-PD, isoform D [Drosophila melanogaster] CG11905-PA, isoform A [Drosophila melanogaster]
sw16061	1605	1823	1.0078	2097	2404	0.9505	1104	1923	0.6021	146	2536	0.0633		gi|24582503|ref|NP_723276.1| CG5973-PB, isoform B [Drosophila melanogaster] CG5973-PA, isoform A [Drosophila melanogaster] CG5973-PC, isoform C [Drosophila melanogaster] HL01515p [Drosophila melanogaster] CG5973-PC, isoform C [Drosophila melanogaster] CG5973-PB, isoform B [Drosophila melanogaster] CG5973-PA, isoform A [Drosophila melanogaster]
sw16074	2445	2141	1.2153	2961	3341	0.8945	2838	3629	0.8894	5552	1885	3.2413		gi|21618849|gb|AAH31791.1| SPFH domain family, member 1 [Homo sapiens] novel protein (FLJ32012) [Homo sapiens] SPFH domain family, member 1 [Homo sapiens] KE04p [Homo sapiens] SPFH domain protein 1 precursor (Protein KE04)
sw16085	6400	10311	0.538	6374	6418	0.9155	4202	5748	0.8049	181	9572	0.0307		gi|72112716|ref|XP_782427.1| PREDICTED: similar to amino acid/polyamine transporter, family II (53.3 kD) (4G107) [Strongylocentrotus purpuratus]
sw16159	732	722	1.2789	893	793	1.459	841	661	1.4465	832	425	2.3017		gi|54645158|gb|EAL33898.1| GA14400-PA [Drosophila pseudoobscura]
sw16160	764	1051	0.8544	736	946	0.9331	2769	1309	2.0079	3622	894	4.18		gi|27374255|gb|AAO01012.1| CG30194-PA [Drosophila erecta]
sw16168	13555	9004	1.2376	15013	11139	1.2333	14530	12981	0.9721	1625	16859	0.0583		gi|441214|dbj|BAA03374.1| intracellular coagulation inhibitor precursor [Tachypleus tridentatus]
sw16181	855	895	1.1254	1005	1530	0.7784	1054	1714	0.6024	2592	700	3.4545		gi|3493460|gb|AAC33509.1| glycolate oxidase [Nicotiana tabacum]
sw16184	3244	2863	1.0346	3462	2760	1.1488	4337	2323	1.698	7893	1671	4.5173		gi|28838718|gb|AAH47807.1| Oxygen regulated protein (150kD) [Danio rerio] oxygen regulated protein (150kD) [Danio rerio]
sw16187	192	701	0.3178	58	888	0.1264	53	458	0.2961	10	386			gi|4090964|gb|AAD09279.1| immune-related Hdd1 [Hyphantria cunea]
sw16188	1366	1189	1.1659	1069	1193	0.9119	1997	877	2.0533	1264	1425	0.873		gi|72133877|ref|XP_788695.1| PREDICTED: similar to predicted CDS, reverse transcriptase family member (1O881) [Strongylocentrotus purpuratus]
sw16212	2448	2883	0.7583	3404	2755	1.1299	1037	1281	0.8509	257	2410	0.1229		gi|48141041|ref|XP_397181.1| PREDICTED: similar to signal transducer and activator of transcription [Apis mellifera]
sw16250	1270	1310	1.0704	1130	1284	1.0031	1473	1306	1.2573	451	2050	0.2761		gi|45551904|ref|NP_732009.2| Tropomyosin 1 CG4898-PI, isoform I [Drosophila melanogaster] Tropomyosin 1 CG4898-PC, isoform C [Drosophila melanogaster] GH09289p [Drosophila melanogaster] LD11194p [Drosophila melanogaster] CG4898-PI, isoform I [Drosophila melanogaster] CG4898-PC, isoform C [Drosophila melanogaster]
sw16254	2199	3607	0.6127	2348	3759	0.6519	2547	3510	0.8232	1941	4848	0.4192		gi|41327776|ref|NP_957518.1| DEAD (Asp-Glu-Ala-Asp) box polypeptide 47 isoform 2 [Homo sapiens]
sw16269	1200	1054	1.2326	1363	1469	0.992	2326	1217	2.2697	1955	1212	1.5543		No hits found
sw16272	1907	2393	0.735	2445	2544	0.8622	1394	2357	0.6756	1405	3352	0.432		gi|55960259|emb|CAI12924.1| RP11-526D20.2 [Homo sapiens] RP11-526D20.2 [Homo sapiens] Protein KIAA0020 (HBV X-transactivated gene 5 protein)
sw16275	7540	7502	0.7464	5826	8233	0.6569	3486	5706	0.6986	4774	12172	0.3618		No hits found
sw16279	882	662	1.3287	1056	741	1.4793	1527	994	1.7596	2734	665	4.6134		gi|2894114|emb|CAA15698.1| EG:152A3.4 [Drosophila melanogaster]
sw16281	645	593	1.2639	667	653	1.1171	372	246		381	1142	0.4687		gi|50753627|ref|XP_414073.1| PREDICTED: similar to pregnancy-induced growth inhibitor [Gallus gallus]
sw16327	208	267		190	319		235	303		939	224	5.3632		gi|50737178|ref|XP_426076.1| PREDICTED: similar to cdk-binding protein [Gallus gallus]
sw16328	467	605	1.0567	558	794	0.9871	1013	489	2.2364	389	741	0.727		gi|48139951|ref|XP_397062.1| PREDICTED: similar to GA17592-PA [Apis mellifera]
sw16330	10330	12426	0.7668	11429	12877	0.959	7455	9215	0.857	3273	8844	0.3757		gi|2224921|gb|AAC47557.1| insect intestinal mucin IIM22 [Trichoplusia ni]
sw16356	225	410	0.7146	486	635	0.9437	99	473	0.2713	4	908	0.0122		gi|6560645|gb|AAF16700.1| juvenile hormone binding protein precursor-like protein [Manduca sexta]
sw16358	2499	2419	1.0731	4761	4307	1.0802	4403	4314	1.0075	18570	1700	8.9264		gi|72011730|ref|XP_787327.1| PREDICTED: similar to hydroxypyruvate isomerase homolog, partial [Strongylocentrotus purpuratus]
sw16374	681	886	0.9153	642	473	1.7125	1000	536	2.4198	833	759	1.2659		gi|50924922|gb|AAH79732.1| Btrc-A-prov protein [Xenopus laevis] Beta-TrCP (Beta-transducin repeat-containing protein) beta-TrCP
sw16379	1196	1014	1.1564	613	1049	0.6852	400	640	0.785	309	1622	0.215		gi|66500348|ref|XP_623953.1| PREDICTED: similar to CG31534-PA, isoform A [Apis mellifera]
sw16392	1131	1106	0.9747	2649	2207	1.0611	2365	2756	0.8105	9216	1055	9.9041		gi|73978038|ref|XP_539648.2| PREDICTED: similar to hydroxypyruvate isomerase homolog [Canis familiaris]
sw16412	1559	1736	0.8635	1860	2400	0.7399	1258	2266	0.5767	650	2412	0.2819		gi|54020928|ref|NP_001005708.1| holocytochrome c synthase (cytochrome c heme-lyase) [Xenopus tropicalis] Holocytochrome c synthase (cytochrome c heme-lyase) [Xenopus tropicalis] holocytochrome c synthase (cytochrome c heme-lyase) [Xenopus tropicalis]
sw16465	8685	8343	0.8446	11912	10119	1.0263	8948	14375	0.7194	77	9485	0.0152		No hits found
sw16468	10784	7583	1.0747	17326	11752	1.2095	16866	11584	1.634	41521	4378	11.6045		gi|57899154|dbj|BAD87097.1| putative receptor protein kinase PERK1 [Oryza sativa (japonica cultivar-group)]
sw16476	2151	2122	0.8912	1891	1928	0.8971	1829	1639	1.1797	3932	1950	2.6405		gi|76154222|gb|AAX25715.2| SJCHGC04764 protein [Schistosoma japonicum]
sw16484	1324	1330	0.8893	1376	960	1.3611	707	606	1.2659	143	1116	0.1736
sw16494	5543	3103	1.638	5772	6354	0.8303	5527	7155	0.818	235	4634	0.0552		gi|87248523|gb|ABD36314.1| Lix1 protein [Bombyx mori]
sw16519	799	1191	0.8482	688	1267	0.7859	717	1050	0.7374	3320	1289	2.3204		gi|28316894|gb|AAO39469.1| RH04286p [Drosophila melanogaster]
sw16520	630	569	1.5216	427	563	1.125	1088	499	2.3464	508	474	1.4648		gi|6984243|gb|AAF34809.1| SP1029 protein [Drosophila melanogaster]
sw16524	778	989	0.9646	649	749	1.2117	1389	972	1.4106	1225	460	2.9786		gi|25090512|sp|Q25513|HGLY_MANSE Hemolymph glycoprotein precursor glycoprotein
sw16530	2848	2842	1.0332	3448	2286	1.6735	2321	1914	1.4289	430	2794	0.1921		gi|62639008|ref|XP_218237.3| PREDICTED: similar to MATER protein isoform-H [Rattus norvegicus]
sw16532	2977	155	29.6191	75	159		2175	148	14.4098	28	2494	0.0173		gi|72019779|ref|XP_792493.1| PREDICTED: similar to choline dehydrogenase precursor [Strongylocentrotus purpuratus]
sw16552	21832	10070	1.8128	34188	17392	1.7584	26356	16111	1.4189	57726	3566	20.2352		gi|41400384|gb|AAS07044.1| plus agglutinin [Chlamydomonas reinhardtii]
sw16576	1249	1324	0.9538	1711	2942	0.5868	957	562	1.5858	359	1632	0.2222
sw16581	220	336		428	332	1.665	1820	314	5.9294	1608	332	6.0241		gi|76559858|dbj|BAE45332.1| ecdysone 20-hydroxylase [Bombyx mori]
sw16584	209	312		310	585	0.6281	261	467	0.6891	844	265	5.0891		No hits found
sw16597	737	443	1.8601	1004	1050	1.0952	2406	928	2.9586	1876	770	2.5343		gi|5596638|gb|AAD45613.1| ecdysis-triggering hormone precursor [Manduca sexta]
sw16601	3730	3784	0.8846	5154	5393	0.9494	3756	4912	0.7338	12009	3009	3.3891		gi|54020956|ref|NP_001005724.1| acyl-Coenzyme A dehydrogenase, short/branched chain [Xenopus tropicalis] Acyl-Coenzyme A dehydrogenase, short/branched chain [Xenopus tropicalis]
sw16608	372	481	0.8856	662	449	1.4905	3340	985	3.5595	0	326			No hits found
sw16610	449	716	0.7365	520	796	0.7462	287	835	0.4312	14	531	0.1142		gi|55245679|gb|EAA04507.2| ENSANGP00000019438 [Anopheles gambiae str. PEST] ENSANGP00000019438 [Anopheles gambiae str. PEST]
sw16623	22672	19823	0.9307	19944	22202	0.7838	7293	19521	0.4303	941	29108	0.0377		gi|55236001|gb|EAA14163.2| ENSANGP00000015840 [Anopheles gambiae str. PEST] ENSANGP00000015840 [Anopheles gambiae str. PEST]
sw16642	3008	4117	0.7263	4903	4555	1.0608	924	1389	0.8218	838	2946	0.3628		gi|68231093|ref|ZP_00570267.1| Adenylylsulfate kinase:Small GTP-binding protein domain [Frankia sp. EAN1pec] Adenylylsulfate kinase:Small GTP-binding protein domain [Frankia sp. EAN1pec]
sw16650	2215	1519	1.6048	6916	3684	1.8992	5614	4815	1.2405	4753	354	15.7856		No hits found
sw16655	4788	8694	0.4504	4070	4319	0.8735	4663	5495	1.0261	39	6112	0.0055		No hits found
sw16724	4075	4428	0.8894	4292	4996	0.9037	2214	1750	1.2203	979	2236	0.4615
sw16729	4378	6074	0.698	7941	6722	1.3184	2549	4508	0.5763	86	3310	0.0389		gi|44986088|gb|AAS54628.1| AGR138Wp [Ashbya gossypii ATCC 10895] AGR138Wp [Eremothecium gossypii]
sw16738	280	324		311	516	0.8976	349	466	0.9608	1419	412	3.8833		gi|23125636|ref|ZP_00107560.1| COG2130: Putative NADP-dependent oxidoreductases [Nostoc punctiforme PCC 73102]
sw16750	4715	5168	0.9176	7105	5126	1.2785	3332	4120	0.7938	262	6001	0.0561		No hits found
sw16753	14810	10120	1.2856	20330	7033	2.6052	20024	4465	4.5318	2942	13277	0.2295
sw16783	1246	900	1.3503	743	996	0.8108	1428	635	2.2373	1132	1070	1.1651
sw16812	1247	989	1.2394	2671	1415	1.7955	956	603	1.9705	66	872	0.1536
sw16813	33665	28746	0.9488	36210	38743	0.7758	10429	34450	0.2395	1455	48479	0.0181		gi|55244211|gb|EAA05760.2| ENSANGP00000018877 [Anopheles gambiae str. PEST] ENSANGP00000018877 [Anopheles gambiae str. PEST]
sw16814	1814	1772	1.0542	3080	2950	1.06	2328	2361	1.1087	2239	1083	2.4281		gi|55700848|dbj|BAD69789.1| Replication protein A large subunit [Bombyx mori]
sw16815	729	929	0.8212	607	911	0.7087	1316	970	1.6122	1014	514	2.4399		gi|82524645|ref|NP_001032328.1| tissue specific transplantation antigen P35B [Xenopus tropicalis]
sw16829	1508	1529	1.1366	2730	2137	1.473	2076	1834	1.2179	3764	1491	3.0294		gi|28380993|gb|AAO41464.1| LP02833p [Drosophila melanogaster]
sw16854	763	660	1.3725	1273	897	1.553	656	1052	0.7032	7998	595	12.5114		gi|32997080|dbj|BAC79386.1| glycerophosphoryl diester phosphodiesterase [Bombyx mori]
sw16868	2307	2710	0.7122	2455	1968	1.1024	3023	2162	1.4694	5887	1613	3.4565		gi|55238805|gb|EAA11739.2| ENSANGP00000010726 [Anopheles gambiae str. PEST] ENSANGP00000010726 [Anopheles gambiae str. PEST]
sw16908	1143	1089	1.2615	573	1062	0.7387	1931	843	2.3399	1120	1278	0.9275
sw16922	4667	4522	1.014	4909	5472	0.9698	3329	4866	0.7545	3266	6974	0.4872		gi|90018289|gb|ABD83950.1| TGF beta-inducible nuclear protein 1 [Bombyx mori]
sw16933	3973	4919	0.7667	4735	5567	0.9538	4189	5186	0.7632	2948	6192	0.3962
sw16993	2070	1432	1.5401	2190	2666	0.8555	1441	2158	0.657	16971	2074	9.0163		gi|73976657|ref|XP_539546.2| PREDICTED: similar to aminoadipate-semialdehyde synthase [Canis familiaris]
sw17020	329	433	0.8854	583	2574	0.2028	120	237		133	385			gi|4521269|dbj|BAA76304.1| endonuclease and reverse transcriptase-like protein [Bombyx mori]
sw17049	287	343		349	590	0.743	284	812	0.4522	1642	377	4.6642		gi|66815655|ref|XP_641844.1| MTHFR [Dictyostelium discoideum] methylenetetrahydrofolate reductase [Dictyostelium discoideum]
sw17059	448	597	0.7884	406	484	0.9504	622	680	1.0233	860	528	2.1246
sw17071	2959	2384	1.0515	3190	2794	1.0894	3603	3598	1.0729	5181	2332	2.0887		gi|72015470|ref|XP_783746.1| PREDICTED: similar to sugar transport protein like (56.8 kD) (XF291), partial [Strongylocentrotus purpuratus]
sw17097	2825	3228	0.9251	3105	4470	0.8261	5054	5013	0.9557	306	2923	0.1449
sw17141	648	2410	0.2884	35	177		183	302		64	801	0.1612
sw17143	2803	3176	0.7823	3223	2595	1.2291	4084	2754	1.4496	1018	2591	0.4288		gi|24641614|ref|NP_727641.1| CG3812-PB, isoform B [Drosophila melanogaster] CG3812-PA, isoform A [Drosophila melanogaster] LD44987p [Drosophila melanogaster] CG3812-PB, isoform B [Drosophila melanogaster] CG3812-PA, isoform A [Drosophila melanogaster]
sw17168	329	446	0.8711	577	713	0.8573	301	451	0.8104	3324	506	8.9741		gi|82914991|ref|XP_728926.1| hypothetical protein PY01201 [Plasmodium yoelii yoelii str. 17XNL] hypothetical protein [Plasmodium yoelii yoelii]
sw17173	1492	1582	0.9411	1947	2091	0.9785	1380	1577	0.8459	485	1783	0.2988
sw17189	670	746	1.0826	815	1197	0.7698	770	779	1.1008	1565	960	2.0233		gi|62652296|ref|XP_576244.1| PREDICTED: phosphatidylserine synthase 1 (predicted) [Rattus norvegicus]
sw17216	2733	1909	1.306	3493	2966	1.0897	2779	3769	0.8686	6313	1900	3.5129		gi|3869218|dbj|BAA34401.1| MBF2 [Bombyx mandarina]
sw17238	727	439	2.0145	2045	1077	2.036	2509	398	5.3747	3940	370	10.7317		gi|85857648|gb|ABC86359.1| IP12438p [Drosophila melanogaster]
sw17297	502	548	1.2471	706	1159	0.8027	1292	1318	0.9678	1193	648	2.1923		gi|72113620|ref|XP_795139.1| PREDICTED: similar to cytochrome b5 domain-containing protein like (3F409) [Strongylocentrotus purpuratus]
sw17321	129	233		194	416	0.7968	362	502	0.7672	1314	306	4.4305
sw17349	18180	18498	0.7528	38886	15433	2.0386	34117	12553	2.7257	19626	13329	1.1406		gi|2613141|gb|AAB84297.1| beta-1 tubulin [Manduca sexta] Tubulin beta-1 chain (Beta-1 tubulin)
sw17350	2609	3135	0.8115	2412	1818	1.3144	1636	1302	1.3325	1461	3016	0.4909		gi|24417709|gb|AAN60442.1| nesprin-1 [Homo sapiens] nesprin 1 longest [Homo sapiens]
sw17363	362	1995	0.1605	2929	5333	0.5464	2016	1224	1.859	242	810	0.4224		gi|55235212|gb|EAA14862.2| ENSANGP00000013993 [Anopheles gambiae str. PEST] ENSANGP00000013993 [Anopheles gambiae str. PEST]
sw17365	2653	537	4.8371	13725	2239	6.9281	34757	3599	14.2048	748	370	2.4616		gi|2564721|gb|AAB81850.1| chitinase [Aedes aegypti]
sw17366	1282	2623	0.4838	1495	1863	0.8522	1660	2108	0.913	814	1880	0.4902		gi|71979889|dbj|BAE17115.1| T-complex protein 1, alpha subunit(TCP-1-alpha)(CCT-alpha) [Delia antiqua]
sw17369	1273	1322	0.9763	2098	1809	1.2411	2249	2593	0.8305	31	1502	0.0366		gi|4530064|gb|AAD21841.1| trypsin-like serine protease [Ctenocephalides felis]
sw17382	545	743	0.8481	1312	1247	1.1551	1525	857	2.0632	309	395			gi|4191331|gb|AAD09748.1| Gasp precursor [Drosophila melanogaster]
sw17383	5206	5111	0.9228	5200	5985	0.8173	2837	3745	0.8797	32351	3048	8.2784		gi|2281291|gb|AAB64082.1| collagen type IV alpha 2 [Drosophila melanogaster]
sw17388	56089	52082	0.7466	84697	45458	1.3513	57088	34131	1.9519	22683	57639	0.3021		gi|71383976|gb|AAZ31061.1| actin 6 [Aedes aegypti]
sw17399	10726	10185	0.8081	15196	12816	1.1011	10866	12826	0.9849	24115	7643	2.1645		gi|73975047|ref|XP_532381.2| PREDICTED: similar to Multifunctional protein ADE2 isoform 1 [Canis familiaris]
sw17409	735	1163	0.7216	994	777	1.4623	1158	675	2.0382	392	866	0.6776		gi|72005159|ref|XP_802084.1| PREDICTED: similar to MAD homolog 3 isoform 8 [Strongylocentrotus purpuratus]
sw17415	1706	1556	1.0184	1097	1049	1.1101	1023	777	1.7018	5207	923	6.4041		gi|72088589|ref|XP_794373.1| PREDICTED: similar to Basement membrane-specific heparan sulfate proteoglycan core protein precursor (HSPG) (Perlecan) (PLC) [Strongylocentrotus purpuratus]
sw17419	2918	3053	0.8474	2445	2318	1.0159	1993	3439	0.6678	56	2857	0.0197		gi|86450723|gb|ABC96697.1| yellow4 [Bombyx mori]
sw17420	795	629	1.2849	803	431	2.1808	940	336	3.079	558	796	0.9749		gi|85090866|ref|XP_958623.1| hypothetical protein [Neurospora crassa N150] predicted protein [Neurospora crassa] predicted protein [Neurospora crassa]
sw17421	4475	4223	0.9906	3647	3935	0.9275	3224	1782	2.1406	2763	3416	0.6847		gi|66564370|ref|XP_395279.2| PREDICTED: similar to GA14079-PA [Apis mellifera]
sw17432	4270	3205	1.1152	5249	4023	1.1247	4703	3330	1.5101	6618	2187	3.9745		gi|50756447|ref|XP_415171.1| PREDICTED: similar to Aldehyde dehydrogenase, mitochondrial precursor (ALDH class 2) (ALDHI) (ALDH-E2) [Gallus gallus]
sw17435	19128	15574	0.8495	20377	14143	1.2631	13079	13447	1.1682	2127	24568	0.0824		gi|14669808|dbj|BAB33159.2| paxillin [Drosophila melanogaster]
sw17440	181	374		132	203		1010	482	2.3074	63	217			gi|72078770|ref|XP_796381.1| PREDICTED: similar to phosphoinositide-3-kinase, class 3 [Strongylocentrotus purpuratus]
sw17492	1509	1426	1.181	2058	1335	1.8146	5746	1578	3.4517	10832	743	14.2958		gi|2245570|gb|AAB62720.1| alpha 1,2-mannosidase [Spodoptera frugiperda]
sw17493	7	120		170	3285	0.0808	14	116		18	527	0.1169		gi|119850|sp|P21828|FIBL_BOMMO Fibroin light chain precursor (Fib-L) (L-fibroin) silk fibroin light chain [Bombyx mori]
sw17507	1118	1413	0.8298	456	675	0.9064	514	849	0.744	124	942	0.1612		gi|55244293|gb|EAA05706.2| ENSANGP00000015940 [Anopheles gambiae str. PEST] ENSANGP00000015940 [Anopheles gambiae str. PEST]
sw17508	10914	6068	1.5875	9300	8771	0.9791	12584	4683	2.5049	11352	7396	1.3707		gi|72108581|ref|XP_789912.1| PREDICTED: similar to myosin 18A isoform a, partial [Strongylocentrotus purpuratus]
sw17528	788	545	1.5737	402	609	0.7836	993	422	2.2101	949	738	1.4454
sw17530	5925	3382	1.6325	8159	5278	1.5179	3399	3370	1.0926	538	5885	0.0896		gi|72090531|ref|XP_792772.1| PREDICTED: similar to zn-finger, CCHC type and RNA-directed DNA polymerase and Integrase, catalytic domain containing protein family member (1E419) [Strongylocentrotus purpuratus]
sw17532	73	209		41	249		12066	201	49.8228	7	149			No hits found
sw17551	2558	1989	1.1231	1774	2250	0.791	3883	1441	2.4414	1941	2298	0.8196
sw17552	4821	4535	0.8668	6374	6693	0.8187	3315	3724	0.8415	2294	4599	0.4202		gi|50927124|gb|AAH79471.1| Choline/ethanolamine phosphotransferase 1 [Rattus norvegicus] choline/ethanolamine phosphotransferase 1 [Rattus norvegicus]
sw17578	829	1011	0.9113	1316	1258	1.1473	697	574	1.4789	209	960	0.3475		gi|71067046|dbj|BAE16275.1| BmRelA [Bombyx mori]
sw17602	668	932	0.8551	665	781	1.0428	540	960	0.7431	144	1290	0.1877
sw17612	1213	1141	1.0294	2849	1471	1.9301	1128	699	1.7539	456	1201	0.4601		gi|72090535|ref|XP_792819.1| PREDICTED: similar to Retrovirus-related Pol polyprotein from transposon opus, partial [Strongylocentrotus purpuratus]
sw17614	483	812	0.7337	431	746	0.717	205	619	0.4995	86	919	0.1739		gi|82901491|ref|XP_911976.1| PREDICTED: similar to serine carboxypeptidase vitellogenic-like [Mus musculus]
sw17620	2353	2969	0.6695	3188	2705	1.0411	3154	3633	0.9376	9227	1834	6.9988		gi|89288511|gb|EAR86499.1| DAK1 domain containing protein [Tetrahymena thermophila SB210]
sw17622	3127	4283	0.7294	1431	2392	0.5895	1571	4380	0.4298	140	3426	0.0603		gi|55645125|ref|XP_511384.1| PREDICTED: similar to carboxypeptidase D precursor [Pan troglodytes]
sw17635	1121	865	1.2164	673	622	1.1727	895	444	2.1351	891	794	1.4044
sw17644	1292	1052	1.1133	2077	1689	1.0931	1842	1907	0.9854	9459	856	11.3398		gi|62529862|gb|AAX85203.1| aldo/keto reductase [Aedes aegypti]
sw17661	2283	1534	1.371	3105	2758	1.1073	3615	2969	1.2638	11563	1394	6.2104		gi|48096076|ref|XP_392394.1| PREDICTED: similar to WAP four-disulfide core domain 2 [Apis mellifera] PREDICTED: similar to WAP four-disulfide core domain 2 [Apis mellifera]
sw17679	809	935	1.0952	847	1143	1.0564	1211	732	1.6336	3176	995	2.9425		gi|76619715|ref|XP_583514.2| PREDICTED: similar to phosphoglucomutase 2 [Bos taurus]
sw17680	389	562	0.9702	404	517	1.1802	787	600	1.3697	1473	759	2.009		gi|73982550|ref|XP_862247.1| PREDICTED: similar to Exostosin-2 (Glucuronosyl-N-acetylglucosaminyl-proteoglycan/N- acetylglucosaminyl-proteoglycan 4-alpha-N-acetylglucosaminyltransferase) (Putative tumor suppressor protein EXT2) (Multiple exostoses protein 2) isoform 3 [Canis familiaris]
sw17681	2016	2303	0.9586	2674	3625	0.8773	2174	2297	0.9443	796	2157	0.4124		gi|72109982|ref|XP_794554.1| PREDICTED: similar to solute carrier family 39 (metal ion transporter), member 11 [Strongylocentrotus purpuratus]
sw17684	27115	21801	0.9967	42121	19983	2.18	31961	12841	2.547	4004	31350	0.1055		gi|18700459|dbj|BAB85197.1| Titin-like protein [Bombyx mori]
sw17690	1773	1567	1.2439	2973	2737	1.2087	2462	2398	1.1877	12047	1419	9.0926		gi|76674321|ref|XP_591611.2| PREDICTED: similar to 3-oxo-5-beta-steroid 4-dehydrogenase (Delta(4)-3-ketosteroid 5-beta-reductase) (Aldo-keto reductase family 1 member D1) [Bos taurus]
sw17700	2050	1371	1.6123	3641	2221	1.8162	2084	826	2.584	3266	898	5.3858		gi|45552295|ref|NP_995670.1| CG15828-PB, isoform B [Drosophila melanogaster] CG15828-PB, isoform B [Drosophila melanogaster]
sw17701	69	334		36	403	0.2631	16922	304	75.3492	16	342			No hits found
sw17705	7281	8345	0.7771	9336	9813	1.0303	7912	6847	1.1376	5252	9050	0.4337		gi|5733122|gb|AAD49435.1| lodestar protein [Homo sapiens]
sw17708	448	494	1.123	332	503	0.854	358	225		14	1011	0.0194		gi|66507132|ref|XP_623204.1| PREDICTED: similar to CG31140-PC, isoform C [Apis mellifera]
sw17712	910	578	1.9434	1662	1739	1.0435	2711	817	3.413	6148	569	19.2529		gi|2498144|sp|Q25490|APLP_MANSE Apolipophorins precursor [Contains: Apolipophorin-2 (Apolipophorin II) (apoLp-2); Apolipophorin-1 (Apolipophorin I) (apoLp-1)] apolipophorin precursor protein
sw17713	12260	11422	0.9376	13606	12645	1.0159	19850	10848	1.835	21981	7876	2.0293		No hits found
sw17724	1421	1083	1.3369	1425	1102	1.2575	1431	698	1.8615	632	1382	0.4626		gi|72013653|ref|XP_785941.1| PREDICTED: similar to euchromatic histone methyltransferase 1 isoform 2 [Strongylocentrotus purpuratus]
sw17727	1486	1220	1.1704	1891	1444	1.3212	2176	2008	1.0889	632	1764	0.3911		gi|66500380|ref|XP_623046.1| PREDICTED: similar to putative tropomyosin [Apis mellifera]
sw17734	166	1093	0.227	10	116		31	136		17	326			gi|82940307|emb|CAJ34654.1| chlorophyllide A binding protein precursor [Bombyx mori]
sw17751	23686	14777	1.1373	26613	25743	0.7766	12353	31047	0.4698	1457	21809	0.0595		gi|38260560|gb|AAR15419.1| cuticle protein 14 [Antheraea pernyi]
sw17753	88	132		170	148		1116	216	7.6558	28	110			gi|21355781|ref|NP_649869.1| CG8420-PA [Drosophila melanogaster] LD42037p [Drosophila melanogaster] CG8420-PA [Drosophila melanogaster]
sw17768	4272	4605	0.8023	5227	4954	0.9302	4111	3815	1.1531	2222	4321	0.4954		gi|66512323|ref|XP_393066.2| PREDICTED: similar to poly(A) binding protein II [Apis mellifera]
sw17771	6298	9212	0.5743	4981	7168	0.6342	518	1950	0.2902	511	17366	0.0376		gi|290935|gb|AAC37204.1| cuticle protein 66 Larval/pupal rigid cuticle protein 66 precursor (HCCP66)
sw17805	11337	8523	1.1462	19419	16484	1.0856	22925	8960	3.067	57731	14489	1.5194		gi|994849|gb|AAB34519.1| attacin [Bombyx mori] Attacin precursor (Nuecin) nuecin [Bombyx mori]
sw17808	992	606	1.6294	2293	1480	1.5181	1567	1392	1.2233	6205	534	23.3863		gi|48865723|ref|ZP_00319582.1| COG1063: Threonine dehydrogenase and related Zn-dependent dehydrogenases [Oenococcus oeni PSU-1]
sw17818	1908	1559	1.3189	2010	1803	1.139	1271	737	1.7157	3324	1264	2.6502
sw17822	1149	1291	0.9921	1067	1136	0.9985	1465	1002	1.467	3912	753	5.1603		gi|66552917|ref|XP_397073.2| PREDICTED: similar to ubiquinol-cytochrome c oxidoreductase subunit 9 and Rieske iron sulfur protein, partial [Apis mellifera]
sw17859	325	587	0.8151	446	604	1.1945	892	571	1.5946	1823	722	2.6772		gi|61608455|gb|AAX47079.1| phosphoglucomutase 2 [Aedes aegypti]
sw17863	5748	221	25.3696	82	208		5513	200	20.83	53	767	0.1601		gi|66513293|ref|XP_623940.1| PREDICTED: similar to peroxidase [Apis mellifera]
sw17865	638	873	0.9062	477	732	0.9754	905	833	1.1877	2642	893	3.3573		gi|50762312|ref|XP_429219.1| PREDICTED: similar to alanine-glyoxylate aminotransferase 2 precursor; beta-alanine-pyruvate aminotransferase; beta-ALAAT II [Gallus gallus]
sw17886	254	367		120	291		1278	268	7.1437	26	418	0.1905		gi|87248331|gb|ABD36218.1| alpha-N-acetylgalactosaminidase [Bombyx mori]
sw17894	2451	1941	1.293	2622	2686	1.0255	2614	1179	2.5383	2851	2592	1.1011		gi|66556188|ref|XP_393596.2| PREDICTED: similar to ubiquitin specific protease 34 [Apis mellifera]
sw17912	16179	9196	1.322	31425	16939	1.2976	34025	19260	1.5833	57723	4251	11.283
sw17921	2761	2723	0.9499	2871	2638	1.1391	2294	1894	1.2106	1093	3063	0.3692
sw17925	347	413	1.0728	405	464	1.1316	1694	449	3.8061	3029	513	6.6447		gi|50760594|ref|XP_418074.1| PREDICTED: similar to angiotensin converting enzyme [Gallus gallus]
sw17943	37499	39223	0.5962	60690	31426	1.2635	17388	27046	0.7915	2653	57610	0.0358		gi|290935|gb|AAC37204.1| cuticle protein 66 Larval/pupal rigid cuticle protein 66 precursor (HCCP66)
sw17945	3139	2159	1.3527	2737	2086	1.3954	1291	2377	0.4843	298	2825	0.1165
sw17947	3900	2317	1.5016	2820	1877	1.3798	1315	2311	0.5963	53	2684	0.0277		gi|76779438|gb|AAI06213.1| LOC446918 protein [Xenopus laevis]
sw17949	5234	4763	0.9498	7546	9135	0.7939	7725	9781	0.7834	36912	2392	12.3892		gi|72086632|ref|XP_791549.1| PREDICTED: similar to interferon gamma inducible protein 30 [Strongylocentrotus purpuratus]
sw17972	3411	2416	1.2473	3871	2987	1.2027	2464	2619	1.0604	257	4578	0.0633		gi|55243432|gb|EAA06700.2| ENSANGP00000010259 [Anopheles gambiae str. PEST] ENSANGP00000010259 [Anopheles gambiae str. PEST]
sw17977	4841	6166	0.7899	6334	6348	1.0237	4844	4138	1.2919	10090	4766	2.0162		gi|5453980|ref|NP_006251.1| DnaJ (Hsp40) homolog, subfamily C, member 3 [Homo sapiens] DnaJ (Hsp40) homolog, subfamily C, member 3 [Homo sapiens] DnaJ (Hsp40) homolog, subfamily C, member 3 [Homo sapiens] DnaJ (Hsp40) homolog, subfamily C, member 3 [Homo sapiens] DnaJ homolog subfamily C member 3 (Interferon-induced, double-stranded RNA-activated protein kinase inhibitor) (Protein kinase inhibito…
sw17981	1484	1530	1.119	1420	1362	1.2039	1316	820	1.7593	580	1481	0.4719		gi|66506685|ref|XP_392322.2| PREDICTED: similar to 1-phosphatidylinositol-4,5-bisphosphate phosphodiesterase beta 1 (Phosphoinositide phospholipase C) (PLC-beta-1) (Phospholipase C-beta-1) (PLC-I) (PLC-154) [Apis mellifera]
sw17998	2961	3128	0.9677	2414	2491	1.0084	1754	2138	0.9494	205	2656	0.1171		No hits found
sw18004	189	287		287	398		124	302		935	281	5.7298		gi|28317263|gb|AAL68138.2| AT29464p [Drosophila melanogaster]
sw18010	2695	3040	0.9107	2393	2196	1.1089	1632	2328	0.7647	143	3117	0.0681		gi|27374388|gb|AAO01125.1| CG13030-PA [Drosophila willistoni]
sw18011	2283	2101	0.934	2201	1894	1.1241	1388	1186	1.3293	907	2106	0.4993		gi|60678185|gb|AAX33599.1| AT25468p [Drosophila melanogaster]
sw18015	895	788	1.0981	497	475	1.2047	855	499	2.0711	449	737	0.8091		gi|12697941|dbj|BAB21789.1| KIAA1698 protein [Homo sapiens]
sw18023	8988	5251	1.25	5953	5114	1.0663	7305	6086	1.3	1062	6692	0.1651		No hits found
sw18024	1557	1585	0.8627	2491	1853	1.1996	1982	1476	1.3823	2485	1203	2.1889		gi|72004744|ref|XP_786833.1| PREDICTED: similar to aldehyde dehydrogenase 2, like [Strongylocentrotus purpuratus]
sw18030	515	575	1.0289	462	491	1.1035	507	385	1.3578	1246	508	2.6276		gi|28317200|gb|AAD27851.2| GM01838p [Drosophila melanogaster]
sw18049	259	314		341	619	0.8875	966	681	1.5937	3174	331	10.9442		gi|2498144|sp|Q25490|APLP_MANSE Apolipophorins precursor [Contains: Apolipophorin-2 (Apolipophorin II) (apoLp-2); Apolipophorin-1 (Apolipophorin I) (apoLp-1)] apolipophorin precursor protein
sw18052	1870	1998	1.0221	3277	2063	1.8651	3852	2077	1.8722	143	1088	0.221		gi|4574742|gb|AAD24195.1| fragmin A [Physarum polycephalum]
sw18076	6423	5309	1.1419	1763	1475	1.3795	1057	1420	0.7339	151	1547	0.124		gi|76680447|ref|XP_615430.2| PREDICTED: similar to ATPase, Cu++ transporting, alpha polypeptide, partial [Bos taurus]
sw18086	240	262		326	302		1288	435	3.8254	203	224			gi|66521747|ref|XP_393873.2| PREDICTED: similar to Intestinal alkaline phosphatase 1 precursor (IAP-I) [Apis mellifera]
sw18096	3698	3871	0.8533	2855	2620	1.1531	4235	2473	1.6276	301	2516	0.1055		gi|45552133|ref|NP_995588.1| CG1674-PD, isoform D [Drosophila melanogaster] CG1674-PD, isoform D [Drosophila melanogaster] RH32892p [Drosophila melanogaster]
sw18130	2002	1835	1.0952	1884	2328	0.8471	1341	2262	0.6629	924	2251	0.4521		gi|89272486|emb|CAJ82475.1| novel protein [Xenopus tropicalis]
sw18135	802	767	1.0854	675	962	0.7908	536	1097	0.5205	3561	966	4.3316		gi|37591031|dbj|BAC98835.1| juvenile hormone acid methyltransferase [Bombyx mori]
sw18141	11674	9359	0.9849	17125	8806	1.9448	11152	6227	2.0112	4136	10609	0.3319		gi|85857468|gb|ABC86270.1| RE41602p [Drosophila melanogaster]
sw18143	3026	1902	1.4551	3830	3418	1.0233	2665	4345	0.6643	4097	1996	2.2263		gi|60654499|gb|AAX29940.1| split hand/foot malformation ectrodactyly type 1 [synthetic construct]
sw18154	3166	2157	1.4573	4770	3660	1.3409	4785	5042	1.0839	136	2954	0.073		gi|4530064|gb|AAD21841.1| trypsin-like serine protease [Ctenocephalides felis]
sw18173	348	525	0.8908	340	521	0.842	11808	543	26.0675	308	620	0.7499		gi|5730152|emb|CAB52474.1| fatty acid desaturase [Drosophila melanogaster]
sw18181	242	358		1027	1177	0.9481	923	671	1.6222	11671	193	39.6174		gi|295756|emb|CAA33113.1| TU-36B protein [Drosophila melanogaster]
sw18185	2737	3436	0.7766	4407	3092	1.4625	5061	2750	2.1693	1026	2158	0.5296		gi|67938380|ref|ZP_00530906.1| Acetyl-CoA hydrolase/transferase [Chlorobium phaeobacteroides BS1] Acetyl-CoA hydrolase/transferase [Chlorobium phaeobacteroides BS1]
sw18188	958	751	1.2734	1113	1014	1.1001	1078	1264	0.9594	2672	1001	4.1086		gi|66535769|ref|XP_623944.1| PREDICTED: similar to GA19585-PA [Apis mellifera]
sw18197	2604	2092	1.1814	1933	2077	0.9369	4339	2611	1.5964	6369	1122	5.0304		gi|54643160|gb|EAL31904.1| GA19265-PA [Drosophila pseudoobscura]
sw18206	1734	1773	1.0536	2387	3051	0.7811	2048	2735	0.8179	4077	1741	2.3126		gi|87248311|gb|ABD36208.1| dermal papilla derived protein 13 [Bombyx mori]
sw18242	2540	3381	0.8151	3403	4234	0.9792	4913	5113	1.014	10627	2138	4.1622		gi|67464483|pdb|1YIY|B Chain B, Aedes Aegypti Kynurenine Aminotransferase Chain A, Aedes Aegypti Kynurenine Aminotransferase
sw18249	9250	7570	1.1231	7168	5637	1.3497	9468	5283	1.7484	1053	9961	0.1294		gi|87248377|gb|ABD36241.1| notch-like protein [Bombyx mori]
sw18252	916	2846	0.3298	978	1277	0.9964	671	797	0.8381	674	832	0.9762
sw18269	552	751	0.9486	792	1211	0.8496	319	813	0.4029	1442	700	2.3635		gi|55243916|gb|EAL41338.1| ENSANGP00000028427 [Anopheles gambiae str. PEST] ENSANGP00000028427 [Anopheles gambiae str. PEST]
sw18271	5369	9440	0.5456	6222	4103	1.6518	6171	2809	2.3019	731	8953	0.1049		gi|87248125|gb|ABD36115.1| EN protein binding/engrailed nuclear homeoprotein-regulated protein [Bombyx mori]
sw18275	1040	886	1.2606	1574	1641	1.0651	1920	2000	1.0171	4198	696	6.3151		gi|6981112|ref|NP_036724.1| isovaleryl Coenzyme A dehydrogenase [Rattus norvegicus] Isovaleryl-CoA dehydrogenase, mitochondrial precursor (IVD) Ivd protein [Rattus norvegicus] isovaleryl-CoA dehydrogenase precursor (EC 1.3.99.10)
sw18279	907	1208	0.8069	1104	1039	1.2373	6271	1231	4.8002	92	939	0.1252		gi|41619182|tpg|DAA04104.1| TPA: TPA_inf: HDC14047 [Drosophila melanogaster]
sw18286	743	741	1.1987	1412	1654	0.9766	588	620	1.1607	361	1035	0.4542		gi|73671228|gb|AAZ78241.1| integrin beta1 subunit-like protein 2 [Danio rerio] integrin beta1 subunit-like protein 2 [Danio rerio]
sw18291	485	518	1.0435	411	616	0.8528	492	946	0.6205	1510	550	3.0088		gi|30387346|ref|NP_848425.1| unknown [Choristoneura fumiferana MNPV] unknown [Choristoneura fumiferana MNPV]
sw18306	340	999	0.4374	326	566	0.7721	136	401	0.5083	553	431	1.781
sw18333	7939	7402	0.8818	13394	14243	0.8878	6491	5534	1.219	7056	16896	0.3367
sw18342	1288	1084	1.2816	1247	738	2.0415	1238	556	2.6547	888	1143	1.016		gi|74006710|ref|XP_861091.1| PREDICTED: similar to BCL-6 interacting corepressor isoform 1 isoform 4 [Canis familiaris]
sw18347	2037	2637	0.7285	3159	2497	1.305	11498	3456	4.2579	20	1680	0.0295		gi|66513293|ref|XP_623940.1| PREDICTED: similar to peroxidase [Apis mellifera]
sw18355	7890	2924	2.188	9939	3229	3.1394	5818	1863	4.228	4729	2336	1.7333		gi|10801051|dbj|BAB16608.1| 210kDa protein [Sarcophaga peregrina]
sw18367	1745	1570	1.0294	2098	2191	0.9768	1701	2353	0.8713	3681	1442	2.2855		gi|4007046|emb|CAA08903.1| spermine synthase [Takifugu rubripes]
sw18369	11988	18355	0.5602	16630	6341	2.6063	2971	1389	2.554	565	16632	0.0406		gi|6560657|gb|AAF16706.1| putative cuticle protein [Manduca sexta]
sw18388	280	867	0.3274	248	449	0.6503	218	307		104	295			gi|86450725|gb|ABC96698.1| yellow5 [Bombyx mori]
sw18390	902	1038	0.994	1061	1165	0.9646	471	1035	0.5356	1799	735	2.6659		gi|9527|emb|CAA47358.1| luciferase [Luciola lateralis] Luciferin 4-monooxygenase (Luciferase)
sw18395	339	482	0.7567	297	384		382	430	1.1594	1091	301	4.6678		gi|72152404|ref|XP_792972.1| PREDICTED: similar to glucosamine (N-acetyl)-6-sulfatase (Sanfilippo disease IIID), partial [Strongylocentrotus purpuratus]
sw18404	12407	7962	1.1108	13902	11404	0.9847	11725	11280	1.1745	1613	9934	0.1212		gi|55241368|gb|EAA08682.2| ENSANGP00000013423 [Anopheles gambiae str. PEST] ENSANGP00000013423 [Anopheles gambiae str. PEST]
sw18407	1115	993	1.0556	882	900	1.0328	471	724	0.7536	2852	868	3.5187
sw18447	1122	1918	0.7051	2546	2940	1.0778	5846	4032	1.3574	15588	601	17.3733		gi|51243503|gb|AAT99455.1| beta-N-acetylglucosaminidase isoform A [Bombyx mori]
sw18472	6661	6295	0.8862	8896	8979	0.9083	11230	10358	0.9511	8591	4067	2.1985		gi|7341330|gb|AAF61252.1| serpin-2 [Bombyx mori]
sw18473	163	221		538	622	1.169	626	500	1.3265	1049	212	5.3899		gi|37704389|ref|NP_780751.2| rotatin [Mus musculus]
sw18478	192	334		348	367		287	312		1817	458	4.3501		gi|13591940|ref|NP_112289.1| dihydropyrimidine dehydrogenase [Rattus norvegicus] dihydropyrimidine dehydrogenase [Rattus norvegicus]
sw18497	7850	7779	0.8455	12758	8583	1.3573	12738	5514	2.3186	16412	5559	2.4727		gi|55235845|gb|EAA14126.2| ENSANGP00000010270 [Anopheles gambiae str. PEST] ENSANGP00000010270 [Anopheles gambiae str. PEST]
sw18510	876	887	1.0637	1119	871	1.3836	958	670	1.6042	6696	1237	5.1991		gi|13591940|ref|NP_112289.1| dihydropyrimidine dehydrogenase [Rattus norvegicus] dihydropyrimidine dehydrogenase [Rattus norvegicus]
sw18525	691	925	0.8079	904	1155	0.8846	915	1138	0.7891	2095	781	2.7605		gi|73973855|ref|XP_532213.2| PREDICTED: similar to 2-oxoisovalerate dehydrogenase beta subunit, mitochondrial precursor (Branched-chain alpha-keto acid dehydrogenase E1 component beta chain) (BCKDH E1-beta) [Canis familiaris]
sw18527	2418	2187	0.9864	3622	1902	1.6718	5566	1759	3.8334	7060	898	8.9986		gi|6448469|dbj|BAA86911.1| homologue of Sarcophaga 26,29kDa proteinase [Periplaneta americana]
sw18561	1182	666	1.9482	1930	1307	1.6062	1777	434	5.0552	3655	1684	1.7481		gi|2058458|gb|AAB53257.1| p260 [Bombyx mori]
sw18577	787	2890	0.326	1057	952	1.1539	902	706	1.2832	84	1020	0.166
sw18578	857	622	1.6293	1254	1250	1.0534	466	1651	0.349	55	876	0.1216		gi|1066473|gb|AAB68060.1| Clb2p: G2/Mitotic-specific cyclin 2 (Swiss Prot. accession number P24869) [Saccharomyces cerevisiae] B-type cyclin involved in cell cycle progression; activates Cdc28p to promote the transition from G2 to M phase; accumulates during G2 and M, then targeted via a destruction box motif for ubiquitin-mediated degradation by the proteasome; Clb2p [Saccharomyces cerevisiae] C…
sw18593	11576	12958	0.769	15864	14192	0.9564	15844	12038	1.3121	24244	5215	3.8524		gi|36957250|gb|AAQ87024.1| juvenile hormone epoxide hydrolase [Bombyx mori]
sw18597	6950	7268	0.8545	14257	11012	1.1344	12724	10403	1.2289	27302	4756	4.6734		gi|136206|sp|P22297|TRF_MANSE Transferrin precursor transferrin
sw18618	1522	2293	0.7165	1717	1648	1.0127	1360	1425	0.9985	361	1623	0.2997		gi|15149556|dbj|BAB62875.1| junctophilin [Drosophila melanogaster]
sw18625	3812	2948	1.2931	3746	3763	1.1259	5236	4074	1.2403	495	3161	0.2045		gi|25012492|gb|AAN71350.1| RE28319p [Drosophila melanogaster]
sw18630	352	503	0.9902	199	544	0.6502	198	266		1358	522	2.8097		gi|57918487|ref|XP_557059.1| ENSANGP00000028192 [Anopheles gambiae str. PEST] ENSANGP00000028192 [Anopheles gambiae str. PEST]
sw18633	2732	3176	0.9132	4617	3691	1.3633	2493	1309	1.9732	913	2497	0.4513		gi|72034333|ref|XP_798150.1| PREDICTED: similar to Alpha-fetoprotein enhancer binding protein (AT motif-binding factor) (AT-binding transcription factor 1) [Strongylocentrotus purpuratus]
sw18642	7981	6986	1.0747	9220	10434	0.9276	8240	8919	1.0342	27673	8117	3.1393		gi|55627398|ref|XP_518747.1| PREDICTED: vanin 2 [Pan troglodytes]
sw18643	1743	3583	0.5246	1203	1313	1.1383	1810	1142	1.7211	739	2565	0.3577
sw18644	94	178		195	188		15162	393	33.9098	12	204			gi|643092|emb|CAA87462.1| urbain [Bombyx mori]
sw18658	3930	4898	0.8247	8165	5058	1.4501	2915	1829	1.7219	1277	3587	0.387		gi|76639351|ref|XP_870725.1| PREDICTED: similar to neurofilament, heavy polypeptide 200kDa isoform 2 [Bos taurus]
sw18662	3955	5241	0.7791	4108	4796	0.8679	4152	4294	0.953	2593	5235	0.4929		gi|87248633|gb|ABD36369.1| ubiquitin conjugating enzyme isoform 1 [Bombyx mori]
sw18675	507	599	0.925	689	2163	0.367	485	817	0.7114	300	615	0.607		gi|82950923|ref|XP_898519.1| PREDICTED: similar to zinc finger protein 709 [Mus musculus]
sw18686	1663	2186	0.7993	2031	1675	1.2814	2457	1391	2.1539	1858	1372	1.3986		gi|49257726|gb|AAH74539.1| MGC69213 protein [Xenopus tropicalis] MGC69213 protein [Xenopus tropicalis] lysosomal-associated protein transmembrane 4 alpha [Xenopus tropicalis]
sw18700	56088	51831	0.7137	84695	69801		57087	57052	1.0826	5200	57696	0.0431
sw18714	1114	1048	1.1431	1651	1280	1.3847	950	823	1.4175	598	1592	0.4359		gi|27819843|gb|AAO24970.1| RE13301p [Drosophila melanogaster]
sw18716	460	469	1.1111	904	796	1.1152	690	862	0.854	3091	519	6.0281		gi|45330818|dbj|BAD12426.1| fructose 1,6-bisphosphate aldolase [Antheraea yamamai]
sw18724	347	1018	0.3767	76	214		82	224		23	463	0.184		gi|20129545|ref|NP_609758.1| CG15253-PA [Drosophila melanogaster] CG15253-PA [Drosophila melanogaster]
sw18729	2207	2547	0.8917	2159	2177	1.0387	660	1605	0.409	838	3040	0.2729		gi|74229818|ref|YP_309022.1| ecdysone glucose transferase (egt) [Trichoplusia ni SNPV] ecdysone glucose transferase (egt) [Trichoplusia ni SNPV]
sw18735	1112	1099	1.058	1183	1192	1.0581	926	823	1.3374	3899	1052	3.8359		gi|89243299|gb|ABD64813.1| plexA [Drosophila virilis]
sw18740	786	889	0.9065	1562	1915	0.7677	940	1624	0.6868	2053	851	3.0729		gi|4557817|ref|NP_000427.1| 3-oxoacid CoA transferase 1 precursor [Homo sapiens] 3-oxoacid CoA transferase 1, precursor [Homo sapiens] succinyl-CoA:3-ketoacid CoA transferase [Homo sapiens] 3-oxoacid CoA transferase 1 [synthetic construct] Succinyl-CoA:3-ketoacid-coenzyme A transferase 1, mitochondrial precursor (Somatic-type succinyl CoA:3-oxoacid CoA-transferase) (Scot-S) succinyl CoA:3-oxoacid…
sw18743	1054	865	1.2299	1224	1368	0.9471	1137	1719	0.8048	1787	747	2.4177		gi|73999552|ref|XP_535120.2| PREDICTED: similar to lactate dehydrogenase A -like [Canis familiaris]
sw18747	269	364		562	1429	0.4156	95	221		34	262
sw18755	2637	2569	0.9218	2177	2715	0.7543	4384	2124	2.6832	5400	2276	2.3399		gi|66538218|ref|XP_395854.2| PREDICTED: similar to CG2991-PB, isoform B [Apis mellifera] PREDICTED: similar to CG2991-PB, isoform B [Apis mellifera]
sw18759	3120	13819	0.182	427	345	1.5387	108	1779	0.0649	439	6446	0.0536		gi|87248241|gb|ABD36173.1| triacylglycerol lipase [Bombyx mori]
sw18769	935	740	1.3871	1388	1435	0.9982	1025	1273	0.8569	4422	694	5.894		gi|45330818|dbj|BAD12426.1| fructose 1,6-bisphosphate aldolase [Antheraea yamamai]
sw18777	6753	5077	1.1015	7023	6197	1.0236	5484	3819	1.4212	18150	3808	3.8105		gi|4056674|gb|AAD09425.1| plexin A [Drosophila melanogaster]
sw18780	577	731	0.7925	889	748	1.2085	209	434	0.6886	204	1062	0.2262		gi|57913281|ref|XP_554483.1| ENSANGP00000028549 [Anopheles gambiae str. PEST] ENSANGP00000028549 [Anopheles gambiae str. PEST]
sw18786	9192	6250	1.3167	12836	9955	1.1319	7132	11331	0.6866	121	8022	0.0168		gi|72127465|ref|XP_796769.1| PREDICTED: similar to predicted CDS, reverse transcriptase family member (1O881) [Strongylocentrotus purpuratus]
sw18789	2807	1866	1.4166	2488	2401	1.0292	2741	1386	2.0176	2270	1782	1.3928
sw18792	943	731	1.2367	1374	1149	1.1014	595	1069	0.5706	240	876	0.3678
sw18806	388	4295	0.1166	121	4893	0.0332	692	1279	0.5823	265	776	0.5148		gi|55239544|gb|EAA10548.2| ENSANGP00000020978 [Anopheles gambiae str. PEST] ENSANGP00000020978 [Anopheles gambiae str. PEST]
sw18813	2528	2262	1.0141	2216	1540	1.4336	1889	1271	1.5586	225	2175	0.1752
sw18815	2255	4690	0.4026	4822	4691	0.9436	18000	6599	2.9274	11604	1422	8.8195		gi|50764028|ref|XP_422928.1| PREDICTED: similar to aldose reductase [Gallus gallus]
sw18817	736	728	1.2114	715	952	1.0346	1102	1508	0.7402	1820	804	2.6707		gi|72005686|ref|XP_780645.1| PREDICTED: similar to isochorismatase domain containing 1 [Strongylocentrotus purpuratus]
sw18858	7158	9761	0.7319	16420	8356	1.624	5360	4447	1.1952	4212	11041	0.3532		gi|76639351|ref|XP_870725.1| PREDICTED: similar to neurofilament, heavy polypeptide 200kDa isoform 2 [Bos taurus]
sw18864	56080	56072	0.6088	84706	68797		57097	57071	0.8062	4541	57698	0.036
sw18870	887	1569	0.632	986	777	1.4686	328	556	0.654	156	957	0.2194		gi|71274154|ref|NP_001025051.1| Scm-like with four mbt domains 2 [Homo sapiens] Scm-like with four mbt domains 2 [Homo sapiens] Scm-like with four mbt domains 2 [Homo sapiens] Scm-like with four mbt domains 2 [Homo sapiens] Scm-like with four mbt domains 2 [Homo sapiens] Scm-like with four MBT domains protein 2
sw18898	2626	889	3.1122	862	1267	0.7428	766	898	1.0088	264	661	0.5482		gi|11120618|gb|AAG30944.1| heat shock protein hsp20.8 [Bombyx mori] heat shock protein hsp20.8A [Bombyx mori]
sw18899	8514	5564	1.2162	12400	5697	1.6688	10546	5148	2.5436	31559	3699	7.7024		gi|102972|pir||A28068 microvitellogenin precursor - tobacco hornworm MICROVITELLOGENIN PRECURSOR microvitellogenin microvitellogenin
sw18903	2832	2441	1.022	3852	2651	1.2974	8604	2777	3.8571	10342	1636	6.6214		gi|45384004|ref|NP_990509.1| 5-aminoimidazole-4-carboxamide ribonucleotide formyltransferase/IMP cyclohydrolase [Gallus gallus] 5-aminoimidazole-4-carboxamide-ribonucleotide transformylase-IMP cyclohydrolase; ATIC [Gallus gallus] Bifunctional purine biosynthesis protein PURH [Includes: Phosphoribosylaminoimidazolecarboxamide formyltransferase (AICAR transformylase); IMP cyclohydrolase (Inosinicas…
sw18911	3581	4431	0.6522	3963	3016	1.1798	5918	2963	2.3853	3624	3144	1.1982		gi|87248651|gb|ABD36378.1| aldehyde dehydrogenase [Bombyx mori]
sw18917	755	644	1.4148	1242	497	2.8184	1217	1001	1.3463	827	1156	0.857
sw18919	4732	3098	1.4818	3363	2748	1.2506	2502	1933	1.5288	561	3178	0.2252		gi|24648915|ref|NP_651010.2| CG5740-PB, isoform B [Drosophila melanogaster] CG5740-PB, isoform B [Drosophila melanogaster]
sw18931	1069	853	1.2646	1517	976	1.7024	2854	967	4.0924	7688	519	12.7044		gi|2245570|gb|AAB62720.1| alpha 1,2-mannosidase [Spodoptera frugiperda]
sw18938	670	895	0.862	661	788	0.9952	791	782	1.1779	325	939	0.4862
sw18954	2749	2401	1.2031	2570	2427	1.1055	4900	1501	3.1608	4245	2431	1.9525		gi|54643658|gb|EAL32401.1| GA15301-PA [Drosophila pseudoobscura]
sw18957	2942	3266	0.8727	2796	2350	1.2403	3051	1573	2.3046	6411	2428	1.8376
sw18960	1159	1181	0.9547	2302	1931	1.1142	847	838	1.15	548	1319	0.4983		gi|66524404|ref|XP_623193.1| PREDICTED: similar to DEAD (Asp-Glu-Ala-Asp) box polypeptide 5, partial [Apis mellifera]
sw18965	1244	1422	0.93	1568	1936	0.8417	1102	1732	0.6999	3838	1752	2.1234		gi|28317069|gb|AAO39553.1| RE01362p [Drosophila melanogaster]
sw18973	4009	2837	1.255	2578	3067	0.8361	2326	1968	1.1862	9579	3832	2.1835		gi|52696263|pdb|1WDU|B Chain B, Endonuclease Domain Of Tras1, A Telomere-Specific Non-Ltr Retrotransposon Chain A, Endonuclease Domain Of Tras1, A Telomere-Specific Non-Ltr Retrotransposon
sw18987	3916	2985	1.0736	3307	2275	1.405	3186	1924	1.689	8499	2885	2.6022		gi|47571974|ref|ZP_00242021.1| COG3639: ABC-type phosphate/phosphonate transport system, permease component [Rubrivivax gelatinosus PM1]
sw18991	2706	2486	0.9321	3178	2466	1.2397	2031	1582	1.3316	3009	1296	2.3964		gi|3047240|gb|AAC41273.1| nucleoporin Nup153 homolog [Xenopus laevis]
sw18999	1378	132	9.9986	20	130		1680	236	8.4048	7	274			gi|1403598|gb|AAC47136.1| retinol dehydratase
sw19017	1697	1632	1.1378	2227	1752	1.4522	805	1435	0.5709	50	1246	0.0794
sw19018	551	858	0.8221	429	526	1.269	285	588	0.5349	267	844	0.4539		gi|82596448|ref|XP_726266.1| hypothetical protein PY05757 [Plasmodium yoelii yoelii str. 17XNL] hypothetical protein [Plasmodium yoelii yoelii]
sw19031	482	677	0.9389	592	696	1.1429	1049	905	1.2859	2185	434	5.1831
sw19034	233	2730	0.0922	-1	163		11	211		10	557	0.0751
sw19049	1328	1949	0.7238	1300	2166	0.7249	1970	1828	1.0285	463	1416	0.389		gi|7682380|gb|AAF67245.1| gp150 [Drosophila virilis]
sw19050	2788	2856	1.0109	3490	2288	1.4993	1716	1306	1.4701	436	3170	0.1693
sw19089	1015	959	1.1019	938	700	1.6336	1099	800	1.4771	76	1207	0.0928		gi|72133877|ref|XP_788695.1| PREDICTED: similar to predicted CDS, reverse transcriptase family member (1O881) [Strongylocentrotus purpuratus]
sw19096	2549	3291	0.6806	3029	2405	1.1576	4259	2475	1.7815	3364	1569	2.0092		gi|16758758|ref|NP_446338.1| lectin, mannose-binding, 1 [Rattus norvegicus] ERGIC-53 protein precursor (ER-Golgi intermediate compartment 53 kDa protein) (Lectin, mannose-binding 1) (p58) p58 cis-Golgi/intermediate compartment protein
sw19113	979	731	1.567	888	1124	0.8882	996	507	2.3655	1005	986	1.259		gi|7862150|gb|AAF70499.1| 3-dehydroecdysone 3alpha-reductase [Spodoptera littoralis]
sw19142	720	897	0.9599	648	627	1.3016	322	600	0.7447	160	968	0.2809
sw19163	1022	1551	0.571	827	755	1.1633	1271	700	2.1173	999	706	1.7329		gi|18138318|ref|NP_542753.1| EGT [Helicoverpa zea single nucleocapsid nucleopolyhedrovirus] ORF130 [Helicoverpa zea single nucleocapsid nucleopolyhedrovirus] egt-like protein [Helicoverpa zea single nucleocapsid nucleopolyhedrovirus]
sw19164	1114	969	1.1053	2131	716	3.0269	1284	478	2.8847	37	1040	0.0531		gi|14030852|gb|AAC17188.3| probable gag protein [Drosophila melanogaster]
sw19166	874	412	2.5591	3562	1073	3.6173	4278	1712	2.3912	7083	426	15.6436		gi|73979930|ref|XP_532861.2| PREDICTED: similar to allantoicase isoform a [Canis familiaris]
sw19182	551	751	0.8424	832	722	1.2862	7823	1182	5.408	165	310			gi|998377|gb|AAC60521.1| chitooligosaccharidolytic beta-N-acetylglucosaminidase; beta-GlcNAcase [Bombyx mori] Chitooligosaccharidolytic beta-N-acetylglucosaminidase precursor (Beta-GlcNAcase) (Beta-hexosaminidase) (Beta-N-acetylhexosaminidase) chitooligosaccharidolytic beta-N-acetylglucosaminidase
sw19212	868	1677	0.5788	888	754	1.6151	170	270		171	1845	0.1411		gi|25012707|gb|AAN71447.1| RE59052p [Drosophila melanogaster]
sw19244	700	1288	0.5385	960	1061	1.038	125	506	0.3006	42	1142	0.0352		gi|117622|sp|P11734|CU08_LOCMI Cuticle protein 8 (LM-8) (LM-ACP 8)
sw19248	910	811	1.2699	1086	1375	0.8725	533	1211	0.4271	200	1098	0.1886
sw19259	38	283		2817	4133	0.6987	3302	1217	2.4611	15	123			gi|1378132|gb|AAC47342.1| serpin 1
sw19262	2223	1239	1.9308	2173	1674	1.3749	1544	853	2.2479	2383	1816	1.3034		gi|2970687|gb|AAC06038.1| beta-glucosidase precursor [Spodoptera frugiperda]
sw19273	961	778	1.3203	2322	1534	1.567	991	1003	0.9805	269	1037	0.3333		gi|74267669|gb|AAI02288.1| Acetyl-Coenzyme A acyltransferase 2 (mitochondrial 3-oxoacyl-Coenzyme A thiolase) [Bos taurus] acetyl-Coenzyme A acyltransferase 2 (mitochondrial 3-oxoacyl-Coenzyme A thiolase) [Bos taurus]
sw19274	6814	5713	1.0379	11165	9716	0.9943	8916	9364	0.9618	8725	3570	2.0368		gi|3885968|gb|AAC78141.1| phosphopyruvate hydratase [Penaeus monodon]
sw19279	293	421	0.7669	234	497	0.6165	170	486	0.5647	1899	311	8.1511		gi|87248347|gb|ABD36226.1| lysosomal thiol reductase IP30 precursor isoform 1 [Bombyx mori]
sw19295	5569	3533	1.3252	12041	6153	1.5179	5952	7558	0.9077	21302	2195	9.4512		gi|66515547|ref|XP_394781.2| PREDICTED: similar to rTS beta protein isoform 2 [Apis mellifera]
sw19321	965	753	1.5344	700	667	1.3052	1670	912	2.0039	418	750	0.7932
sw19357	4396	3559	1.0888	4339	3575	1.1198	2497	4048	0.6903	312	3110	0.1456		gi|89243313|gb|ABD64823.1| Best1 [Drosophila virilis]
sw19360	659	709	0.9343	642	847	0.7611	799	1052	0.8368	1431	754	2.8371		gi|28829800|gb|AAO52302.1| similar to Homo sapiens (Human). Dentin sialophosphoprotein precursor [Contains: Dentin phosphoprotein (Dentin phosphophoryn) (DPP); Dentin sialoprotein (DSP)] [Dictyostelium discoideum]
sw19372	7990	5090	1.175	9449	6346	1.262	3879	3551	1.158	127	6139	0.02		gi|6560645|gb|AAF16700.1| juvenile hormone binding protein precursor-like protein [Manduca sexta]
sw19373	2473	2046	1.1572	2784	2603	1.0555	3516	2937	1.2384	475	1291	0.4901		gi|1542877|emb|CAA65152.1| orf [Drosophila melanogaster]
sw19378	952	889	1.1934	1272	868	1.4646	2810	1162	2.5118	1512	744	2.5402		No hits found
sw19386	102	149		188	236		9579	352	28.1801	18	183			gi|60099894|gb|AAX13081.1| glucose dehydrogenase [Drosophila miranda]
sw19396	1373	1534	1.0162	1078	1711	0.7931	547	1079	0.4798	471	2076	0.2721		gi|48097673|ref|XP_391931.1| PREDICTED: similar to cytochrome P450 CYP6K1 [Apis mellifera] PREDICTED: similar to cytochrome P450 CYP6K1 [Apis mellifera]
sw19400	3593	4197	0.8397	3055	2022	1.7813	4398	3710	1.1765	206	2854	0.1002		gi|55234389|gb|EAA00595.2| ENSANGP00000016473 [Anopheles gambiae str. PEST] ENSANGP00000016473 [Anopheles gambiae str. PEST]
sw19424	2352	1980	1.2752	2256	1673	1.552	2724	1897	1.3856	336	2421	0.1593		gi|62897027|dbj|BAD96454.1| SET domain and mariner transposase fusion gene variant [Homo sapiens] metnase [Homo sapiens]
sw19436	480	330	2.0269	380	762	0.5871	1294	478	2.8713	815	832	1.2805		gi|72133877|ref|XP_788695.1| PREDICTED: similar to predicted CDS, reverse transcriptase family member (1O881) [Strongylocentrotus purpuratus]
sw19440	12833	9085	1.1531	19221	14855	1.1445	18660	16634	0.9626	35928	6550	5.5366		gi|87248109|gb|ABD36107.1| enoyl-CoA hydratase precursor 1 [Bombyx mori]
sw19454	12224	7346	1.4061	17144	14037	1.1008	11995	14947	0.8358	37764	4025	7.93		gi|55235212|gb|EAA14862.2| ENSANGP00000013993 [Anopheles gambiae str. PEST] ENSANGP00000013993 [Anopheles gambiae str. PEST]
sw19460	4426	4523	0.8034	6495	5541	0.9929	4746	5798	0.7874	623	4887	0.1089		gi|2055276|dbj|BAA19776.1| Pol protein [Bombyx mori]
sw19475	1131	709	1.6744	983	1097	0.9421	961	553	2.0368	1012	814	1.5538		gi|2662335|dbj|BAA23654.1| ORF1 [Bombyx mori]
sw19483	3117	2624	1.0366	1941	1337	1.3821	1638	1337	1.3546	1042	3463	0.3319		gi|73969016|ref|XP_849562.1| PREDICTED: similar to megakaryoblastic leukemia 1 protein isoform 2 [Canis familiaris]
sw19491	512	455	1.3433	1456	1012	1.5997	3588	1636	2.675	7332	362	19.5147		gi|78217419|gb|ABB36785.1| cytochrome P450 monooxygenase [Apis mellifera]
sw19509	2429	3203	0.8264	2727	4116	0.6693	786	3233	0.2473	59	3398	0.0186		gi|68354314|ref|XP_684482.1| PREDICTED: similar to family 4 cytochrome P450 isoform 1 [Danio rerio]
sw19513	1251	947	1.5474	1724	2426	0.7543	971	1745	0.5838	67	1206	0.0798
sw19519	571	500	1.2863	1184	1001	1.2916	730	895	1.0584	859	355	3.0701		gi|89290410|gb|EAR88398.1| Bifunctional endo-1,4-beta-xylanase xylA precursor, putative [Tetrahymena thermophila SB210]
sw19526	1084	1240	0.9921	929	1513	0.6879	724	1543	0.6087	27	848	0.0831		gi|55242911|gb|EAA07041.2| ENSANGP00000016729 [Anopheles gambiae str. PEST] ENSANGP00000016729 [Anopheles gambiae str. PEST]
sw19534	8193	7940	0.9548	9609	7730	1.1729	6206	5537	1.1919	4022	11570	0.3741
sw19548	11520	6675	1.3238	13197	9383	1.165	7493	12559	0.6773	215	10870	0.0148		gi|58396261|ref|XP_321778.2| ENSANGP00000009736 [Anopheles gambiae str. PEST] ENSANGP00000009736 [Anopheles gambiae str. PEST]
sw19551	2139	179	15.6571	54	170		3918	190	25.441	16	1069	0.036		gi|25140427|gb|AAN71633.1| serine protease inhibitor serpin 1b [Mamestra configurata]
sw19561	1109	780	1.4408	951	1126	0.9156	825	616	1.5117	441	1230	0.4826
sw19567	4601	4395	0.8371	6169	4629	1.2294	4005	4010	1.0747	9523	3574	2.2976		gi|16877801|gb|AAH17135.1| Glycine decarboxylase [Mus musculus] glycine decarboxylase [Mus musculus] Glycine dehydrogenase [decarboxylating], mitochondrial precursor (Glycine decarboxylase) (Glycine cleavage system P-protein)
sw19574	2401	3449	0.7212	3390	2180	1.442	9271	1945	5.0635	940	2091	0.5539		gi|27368143|gb|AAN87269.1| ORF [Drosophila melanogaster]
sw19580	233	304		94	313		117	300		825	295	4.0762		gi|4160012|gb|AAD05225.1| dissatisfaction [Drosophila melanogaster]
sw19587	2466	3625	0.7248	1823	2291	1.0257	3015	4164	0.7304	13	2934	0.0134		gi|86450731|gb|ABC96701.1| yellow8 [Bombyx mori]
sw19598	26759	18897	1.1882	56935	29794	1.8037	51670	29514	1.883	57727	4059	9.7513		gi|217206|dbj|BAA02995.1| antichymotrypsin precursor [Bombyx mori] Antichymotrypsin-1 precursor (Antichymotrypsin I) (ACHY-I)
sw19609	1033	1161	1.0594	899	1320	0.8714	1227	1311	0.9237	134	1057	0.204		gi|72132766|ref|XP_792558.1| PREDICTED: similar to predicted CDS, reverse transcriptase like family member (4D351) [Strongylocentrotus purpuratus]
sw19611	393	486	1.1297	574	772	0.9973	658	707	1.0643	1326	389	3.731		gi|40217847|ref|NP_054733.2| activating signal cointegrator 1 complex subunit 3-like 1 [Homo sapiens] U5 small nuclear ribonucleoprotein 200 kDa helicase (U5 snRNP-specific 200 kDa protein) (U5-200KD) (Activating signal cointegrator 1 complex subunit 3-like 1) (BRR2 homolog)
sw19662	142	155		133	299		52	150		1000	232	6.0274		gi|62529862|gb|AAX85203.1| aldo/keto reductase [Aedes aegypti]
sw19690	1342	818	1.7992	4366	2389	1.9804	7192	774	10.4018	3117	563	6.4557		gi|74267404|dbj|BAE44199.1| cuticular protein [Tachypleus tridentatus]
sw19691	1019	930	1.1708	820	845	1.0639	1129	852	1.5817	1321	728	2.1449		gi|50759977|ref|XP_417849.1| PREDICTED: similar to solute carrier family 37 (glycerol-3-phosphate transporter), member 2 [Gallus gallus]
sw19704	1269	1367	0.8949	482	766	0.6408	294	691	0.5896	946	3782	0.2652
sw19717	17761	8476	1.7359	23704	16377	1.3409	23066	10230	2.6874	40491	6075	2.8456
sw19731	4844	3676	1.0749	4359	3783	1.0773	4892	2695	2.1107	4484	4109	1.0721		gi|76660983|ref|XP_615728.2| PREDICTED: similar to sperm-specific sodium proton exchanger [Bos taurus]
sw19734	6258	4955	1.1995	7792	7612	1.024	7775	6543	1.3149	24393	4268	4.8513		gi|72030844|ref|XP_786555.1| PREDICTED: similar to predicted CDS, reverse transcriptase family member (1O881), partial [Strongylocentrotus purpuratus]
sw19762	4550	5129	0.8676	5130	3550	1.3172	5116	4307	1.2695	1757	5067	0.3895		gi|72004925|ref|XP_781695.1| PREDICTED: similar to ankyrin 3, epithelial isoform a [Strongylocentrotus purpuratus]
sw19763	994	698	1.3153	806	725	1.1438	1344	522	2.9719	979	703	1.6982		gi|66506389|ref|XP_393156.2| PREDICTED: similar to plexus [Apis mellifera]
sw19774	1006	1021	1.0935	1251	790	1.5851	1176	894	1.4031	125	1337	0.1476
sw19777	3193	2656	1.2291	4234	4915	0.9832	4156	6202	0.6182	11394	1347	8.612		gi|74267735|gb|AAI02447.1| Galactose mutarotase (aldose 1-epimerase) [Bos taurus] Aldose 1-epimerase (Galactose mutarotase) galactose mutarotase (aldose 1-epimerase) [Bos taurus] galactose mutarotase (aldose 1-epimerase) [Bos taurus]
sw19793	1218	1301	1.0968	1294	851	1.868	1827	776	2.3876	738	1068	0.8393		gi|58477005|gb|AAH89528.1| Tcp11 protein [Mus musculus]
sw19806	4271	2598	1.7125	3452	3210	1.1874	4857	1888	3.2116	5535	4571	1.2564
sw19810	6352	5095	1.201	6963	6270	1.0459	8866	5912	1.4679	21443	4513	3.7397		gi|2575865|dbj|BAA23126.1| BmP109 [Bombyx mori]
sw19837	6275	5434	1.0753	4148	3332	1.2764	5586	2569	2.1004	493	8493	0.0793		gi|2738865|gb|AAB94558.1| hemocyte protease-2 [Manduca sexta]
sw19838	316	503	0.8145	832	961	0.9684	696	859	0.8763	1611	586	3.1007		gi|66517780|ref|XP_392910.2| PREDICTED: similar to chromodomain Y-like protein 2 [Apis mellifera]
sw19840	6111	6283	0.8007	38169	17462	1.4848	5418	5209	0.9572	7476	29246	0.1587		gi|21355999|ref|NP_650927.1| CG5621-PA [Drosophila melanogaster] GH10694p [Drosophila melanogaster] CG5621-PA [Drosophila melanogaster]
sw19848	2501	1795	1.2304	3057	2745	0.9815	3521	1493	2.1635	1418	2382	0.5861		gi|30584647|gb|AAP36576.1| Homo sapiens dynein, cytoplasmic, intermediate polypeptide 2 [synthetic construct] dynein cytoplasmic intermediate polypeptide 2 [synthetic construct]
sw19860	4030	4482	0.7513	6195	4324	1.2601	5659	4182	1.3969	6505	2796	2.0112		gi|66525580|ref|XP_624401.1| PREDICTED: similar to GA10458-PA [Apis mellifera]
sw19862	334	547	0.7612	372	488	0.9468	442	374	1.5501	1060	499	3.0352		gi|56784870|dbj|BAD82110.1| putative 4-coumarate:coenzyme A ligase [Oryza sativa (japonica cultivar-group)] putative 4-coumarate:coenzyme A ligase [Oryza sativa (japonica cultivar-group)]
sw19883	13324	14909	0.7333	15077	11886	1.1844	7835	8810	1.0651	2328	10784	0.2292		gi|25009971|gb|AAN71152.1| GH05912p [Drosophila melanogaster]
sw19884	1738	2289	0.7154	2622	2660	0.9111	3066	2227	1.5404	492	1730	0.3434		gi|72049850|ref|XP_787337.1| PREDICTED: similar to solute carrier family 2, (facilitated glucose transporter), member 8 [Strongylocentrotus purpuratus]
sw19893	56082	42147	1.0201	84714	77535		57089	57044	1.196	4718	57677	0.0467		gi|44889043|sp|Q08738|CU30_BOMMO Larval cuticle protein LCP-30 precursor larval cuticle protein [Bombyx mori]
sw19900	526	365	1.6492	919	484	2.0488	4368	761	4.8778	144	404	0.6988		gi|57506558|dbj|BAD86650.1| reverse transcriptase [Bombyx mori]
sw19910	41530	41967	0.7714	63791	52483	0.9717	34403	55631	0.6529	3180	56457	0.0592		gi|6560685|gb|AAF16720.1| unknown [Manduca sexta]
sw19928	15586	10090	1.1275	18425	15230	0.9756	14723	16001	1.0517	2373	14041	0.1378
sw19929	2247	1216	1.7508	6963	2664	2.1515	6794	2944	2.1205	12819	1219	8.4355		gi|217280|dbj|BAA02093.1| hemolymph protein [Bombyx mori]
sw19967	1600	1146	1.2411	612	1206	0.4849	616	1112	0.6397	96	605	0.2269		gi|83317874|ref|XP_731351.1| erythrocyte membrane-associated giant protein antigen 332 [Plasmodium yoelii yoelii str. 17XNL] erythrocyte membrane-associated giant protein antigen 332 [Plasmodium yoelii yoelii]
sw19971	2347	2180	1.168	2870	1988	1.809	4082	1212	2.9875	305	2022	0.2248		gi|1070611|pir||FAFFAA alpha-actinin - fruit fly (Drosophila melanogaster)
sw19972	1868	2266	0.8823	3110	2854	1.2584	1853	2142	0.8076	599	1442	0.4884
sw19977	12229	13392	0.8324	13758	11370	1.2445	7734	9296	0.7678	1664	10292	0.1914
sw19986	307	539	0.791	708	811	1.1367	308	200		44	921	0.0988		gi|61554518|gb|AAX46572.1| atlastin [Bos taurus]
sw19990	1359	1234	1.2514	1268	1234	1.2255	1083	808	1.6822	4463	1506	3.3429		gi|68379861|ref|XP_696779.1| PREDICTED: similar to Sortilin-related receptor precursor (Sorting protein-related receptor containing LDLR class A repeats) (mSorLA) (SorLA-1) (Low-density lipoprotein receptor relative with 11 ligand-binding repeats) (LDLR relative with 11 ligand-binding re... [Danio rerio]
sw19998	2861	2644	1.124	2929	2323	1.4071	2384	1563	1.8379	5795	2472	2.5251		gi|58866052|ref|NP_808484.2| SH2 domain containing 4B [Mus musculus]
sw20001	3529	3850	0.899	4486	4309	1.1645	6054	7295	0.7916	15323	4175	2.3113		gi|50746827|ref|XP_426301.1| PREDICTED: similar to alanine-glyoxylate aminotransferase 2-like 1 [Gallus gallus]
sw20019	349	895	0.4184	327	596	0.7309	464	411	1.3714	623	517	1.4048		gi|48094737|ref|XP_394256.1| PREDICTED: similar to GA10571-PA [Apis mellifera]
sw20092	422	538	0.8716	705	626	1.1759	1143	1225	1.033	3015	553	7.2377		gi|38679393|gb|AAR26518.1| antennal cytochrome P450 CYP9 [Mamestra brassicae]
sw20098	54565	36604	1.1744	75821	32870	1.9359	51191	31245	1.5475	6069	57680	0.1048		gi|66504546|ref|XP_394333.2| PREDICTED: similar to small heat shock protein [Apis mellifera]
sw20123	859	985	0.8106	573	853	0.7386	1052	852	1.428	2386	1206	2.1801		gi|68371144|ref|XP_693949.1| PREDICTED: similar to cathepsin F [Danio rerio]
sw20130	1567	2364	0.7106	2115	2846	0.7367	2584	3870	0.7115	9525	883	10.1025		gi|72062727|ref|XP_798116.1| PREDICTED: similar to Galactokinase (Galactose kinase) [Strongylocentrotus purpuratus]
sw20131	1332	1493	0.8222	1333	1611	0.8237	1136	1850	0.6748	2204	1125	2.1231		gi|62752004|ref|NP_001015784.1| MGC108363 protein [Xenopus tropicalis] MGC108363 protein [Xenopus tropicalis]
sw20163	95	263		124	286		123	266		817	284	3.7737
sw20167	2335	2242	1.1299	2361	2722	1.0886	2865	1852	1.4731	6072	2223	2.1154
sw20168	19	137		27	193		18584	398	61.5891	91	183			gi|2058458|gb|AAB53257.1| p260 [Bombyx mori]
sw20186	650	610	1.3759	1465	882	1.9999	3650	905	5.3083	8403	1319	6.9962		gi|24581233|ref|NP_722840.1| Activin Like Protein at 23B CG16987-PB, isoform B [Drosophila melanogaster] Activin Like Protein at 23B CG16987-PA, isoform A [Drosophila melanogaster] GH14433p [Drosophila melanogaster] CG16987-PB, isoform B [Drosophila melanogaster] CG16987-PA, isoform A [Drosophila melanogaster]
sw20196	904	1174	0.7967	1053	1053	1.1551	413	519	0.8551	211	870	0.2697
sw20201	2242	2223	1.0598	2209	2570	1.0013	2654	2665	0.9457	5918	1547	2.8943		gi|72016325|ref|XP_783979.1| PREDICTED: similar to solute carrier family 35, member B1 [Strongylocentrotus purpuratus]
sw20203	3379	3664	0.8377	2682	3132	0.9239	3526	3470	1.053	885	4455	0.1731		gi|3004821|gb|AAC39088.1| putative inorganic phosphate cotransporter [Drosophila ananassae] Putative inorganic phosphate cotransporter
sw20204	822	737	1.2836	1618	1338	1.3806	2096	1637	1.2389	2008	572	5.5604		gi|54648564|gb|AAH85041.1| LOC495469 protein [Xenopus laevis]
sw20207	2380	1588	1.454	2820	2464	1.2229	4683	3770	1.2676	3751	1739	2.0442		gi|57506562|dbj|BAD86652.1| reverse transcriptase [Bombyx mori]
sw20210	565	501	1.4184	689	587	1.4227	492	495	1.1905	121	822	0.209		gi|14574131|gb|AAC71139.2| Phosphatase with ef hands protein 1, isoform a [Caenorhabditis elegans] Phosphatase with EF hands family member (pef-1) [Caenorhabditis elegans] protein phosphatase with EF-hands [Caenorhabditis elegans]
sw20215	1166	1512	0.7352	2594	2354	1.1077	5505	4084	1.3325	16074	392	43.7749		gi|51243505|gb|AAT99456.1| beta-N-acetylglucosaminidase isoform B [Bombyx mori]
sw20223	41	116		121	206		248	283		913	86	15.308		gi|89243283|gb|ABD64800.1| Dvir_CG14130 [Drosophila virilis]
sw20224	2389	1079	2.2153	1976	2088	0.917	2374	694	3.0539	1547	1032	1.5514		gi|73970279|ref|XP_531859.2| PREDICTED: similar to UNCoordinated family member (unc-44) [Canis familiaris]
sw20230	429	437	1.2128	408	668	0.7818	535	977	0.6262	1356	383	4.5939		No hits found
sw20231	1220	1107	1.0217	1346	1372	1.0317	1868	1485	1.2985	2028	961	2.3346		gi|29290092|gb|AAO67563.1| Gag protein [Drosophila virilis] Gag protein [Drosophila virilis]
sw20266	1301	2032	0.6638	1530	1455	1.1323	624	1576	0.4669	9	1815	0.0166		gi|402298|gb|AAC37214.1| brown protein brown gene
sw20280	7530	6081	0.9653	10445	8674	1.0523	6485	7481	1.0196	2597	8180	0.2831		gi|6560653|gb|AAF16704.1| calcyphosine-like protein [Manduca sexta]
sw20287	3919	2292	1.467	3091	3700	0.8228	3209	1524	2.7902	2863	2636	0.9778		gi|57934481|ref|XP_558735.1| ENSANGP00000026390 [Anopheles gambiae str. PEST] ENSANGP00000026390 [Anopheles gambiae str. PEST]
sw20311	2113	2165	0.8314	1915	1515	1.2322	647	996	0.7504	378	2541	0.1846
sw20314	3738	3735	0.9955	1996	4176	0.4636	1880	2698	0.7651	11901	3250	3.2855		gi|13359090|dbj|BAB33294.1| Bacteriophage T7 lysozyme-like protein 1 (BTL-LP1) [Bombyx mori]
sw20315	338	119		50	154		1129	268	5.3337	256	546	0.6874		gi|66513293|ref|XP_623940.1| PREDICTED: similar to peroxidase [Apis mellifera]
sw20321	5643	4715	1.08	6007	5822	0.9465	4171	4635	0.9401	1510	4642	0.3845		gi|6560653|gb|AAF16704.1| calcyphosine-like protein [Manduca sexta]
sw20327	34148	18735	1.1034	36057	23628	1.2403	20713	27010	0.905	1640	34929	0.0425		gi|73913564|gb|AAZ91696.1| prophenoloxidase activating proteinase-2 [Manduca sexta]
sw20331	1546	952	1.4646	1071	1033	1.0778	1641	759	2.1871	2056	1947	1.1061
sw20338	779	1110	0.8065	693	816	0.9122	1353	588	2.4762	2404	762	3.8033		gi|27542790|gb|AAO16877.1| wunen-trimeric MYC tag fusion protein [synthetic construct]
sw20340	1090	773	1.338	1552	1036	1.305	776	727	1.1881	1233	697	2.1277		gi|14090280|dbj|BAB55594.1| heparan sulfate 6-O-sulfotransferase [Drosophila melanogaster]
sw20346	7980	11884	0.6353	7179	10811	0.614	3612	8220	0.4732	225	13070	0.0217		gi|66514096|ref|XP_392261.2| PREDICTED: similar to ENSANGP00000015840 [Apis mellifera]
sw20350	5111	4656	1.0561	5166	3963	1.1926	5388	3113	1.8381	1730	4198	0.4681		gi|15145362|gb|AAA28050.2| Aconitase protein 2, isoform a [Caenorhabditis elegans] ACOnitase family member (aco-2) [Caenorhabditis elegans] Probable aconitate hydratase, mitochondrial precursor (Citrate hydro-lyase) (Aconitase)
sw20360	621	878	0.8914	868	1470	0.7643	1591	1784	0.8322	1614	682	2.4236		gi|68534792|gb|AAH98909.1| Solute carrier family 7 (cationic amino acid transporter, y+ system), member 9 [Rattus norvegicus] solute carrier family 7 (cationic amino acid transporter, y+ system), member 9 [Rattus norvegicus] B(0,+)-type amino acid transporter 1 (B(0,+)AT) (Glycoprotein-associated amino acid transporter b0,+AT1) BAT1 [Rattus norvegicus]
sw20364	2738	5369	0.4795	4001	5113	0.8733	5466	5236	1.0405	4640	6077	0.6583		gi|12804549|gb|AAH01687.1| Asparaginyl-tRNA synthetase [Homo sapiens] asparaginyl-tRNA synthetase [Homo sapiens] asparaginyl-tRNA synthetase [Homo sapiens] Asparaginyl-tRNA synthetase, cytoplasmic (Asparagine--tRNA ligase) (AsnRS) Asparaginyl tRNA Synthetase [Homo sapiens]
sw20367	2947	4152	0.7341	3640	3211	1.3688	8104	2766	2.5727	9398	3872	1.6871		gi|73746664|gb|AAZ82242.1| prostatic acid phosphatase [Pongo pygmaeus]
sw20370	862	1252	0.7922	1033	1443	0.8606	1700	1480	1.3571	3899	758	6.0995		gi|55742190|ref|NP_001006691.1| methylcrotonoyl-Coenzyme A carboxylase 1 (alpha) [Xenopus tropicalis] Methylcrotonoyl-Coenzyme A carboxylase 1 (alpha) [Xenopus tropicalis]
sw20377	1087	1258	1.0189	1188	1078	1.3659	1260	814	1.5592	94	1020	0.1612		gi|50937053|ref|XP_478054.1| plectin-like protein [Oryza sativa (japonica cultivar-group)] plectin-like protein [Oryza sativa (japonica cultivar-group)]
sw20407	1458	1350	1.031	1867	1093	1.7078	1553	1319	1.1643	52	1464	0.053		gi|57506562|dbj|BAD86652.1| reverse transcriptase [Bombyx mori]
sw20413	954	2182	0.4651	737	851	1.0768	602	665	0.957	2422	1228	1.8995		gi|70795034|gb|AAZ08480.1| gram negative bacteria binding protein 1 [Nasutitermes comatus]
sw20415	351	557	0.7144	208	526	0.5833	133	554	0.3966	1091	416	2.9704		gi|62286614|sp|Q60HC5|DHC24_MACFA 24-dehydrocholesterol reductase precursor (3-beta-hydroxysterol delta-24-reductase)
sw20428	734	916	0.8035	1162	1255	0.8915	524	882	0.6524	285	979	0.3605		gi|72173283|ref|XP_791277.1| PREDICTED: similar to reverse transcriptase family member (1F383) [Strongylocentrotus purpuratus]
sw20429	7401	6098	1.0181	8719	10320	0.8244	9500	12231	0.7744	25454	5773	3.5947		gi|4262359|gb|AAD14592.1| scolexin B [Manduca sexta]
sw20440	1636	1519	1.047	2017	912	2.0113	897	538	1.7963	123	1262	0.1347		gi|31746683|gb|AAP68958.1| Uncoordinated protein 89, isoform b [Caenorhabditis elegans] UNCoordinated family member (unc-89) [Caenorhabditis elegans] Muscle M-line assembly protein unc-89 (Uncoordinated protein 89)
sw20441	419	782	0.616	513	863	0.7102	150	469	0.3819	49	1073	0.0781		gi|72007880|ref|XP_780848.1| PREDICTED: similar to Aryl hydrocarbon receptor precursor (Ah receptor) (AhR) [Strongylocentrotus purpuratus]
sw20455	138	749	0.1984	214	248		8107	429	25.7266	39	260			gi|73992800|dbj|BAE43413.1| hypothetical protein [Bombyx mori]
sw20457	308	800	0.4991	235	471	0.6893	340	457	0.8902	265	677	0.5244		gi|1208732|gb|AAA90971.1| ovary2
sw20459	1391	1529	0.9109	2102	2172	0.9841	988	2237	0.4889	4591	1013	4.6125		gi|72157793|ref|XP_789073.1| PREDICTED: similar to Malate/L-lactate dehydrogenase (42.8 kD) (2M3) [Strongylocentrotus purpuratus]
sw20460	463	486	1.0748	488	538	1.0262	355	342		2315	842	2.8592		gi|85857500|gb|ABC86286.1| LP13067p [Drosophila melanogaster]
sw20464	669	709	0.9894	1396	1495	0.9111	834	1624	0.4855	555	426	1.8508		gi|415798|emb|CAA81643.1| blastopia polyprotein [Drosophila melanogaster]
sw20472	2496	1924	1.1863	3928	3909	0.9103	4402	4581	1.0991	9907	1567	6.6911		gi|66499360|ref|XP_396507.2| PREDICTED: similar to CG11550-PA [Apis mellifera]
sw20496	977	886	1.0953	1087	1102	0.971	878	902	1.104	82	1062	0.089		gi|55243274|gb|EAA06489.2| ENSANGP00000019302 [Anopheles gambiae str. PEST] ENSANGP00000019302 [Anopheles gambiae str. PEST]
sw20505	26736	16390	1.119	50362	21776	1.7174	25991	9913	2.4511	3357	23180	0.1575		gi|10959|emb|CAA41557.1| paramyosin [Drosophila melanogaster]
sw20508	9384	6877	1.0435	11935	11728	0.8272	8346	10418	0.8997	16000	7450	2.2219		gi|87313157|gb|ABD37875.1| catsup protein [Drosophila melanogaster]
sw20520	5344	3105	1.3534	6832	4341	1.3687	5343	2924	1.9853	18193	3258	4.2753		gi|27806651|ref|NP_776466.1| dihydropyrimidine dehydrogenase [Bos taurus] Dihydropyrimidine dehydrogenase [NADP+] (DPD) (DHPDHase) (Dihydrouracil dehydrogenase) (Dihydrothymine dehydrogenase) dihydropyrimidine dehydrogenase [Bos taurus]
sw20525	665	442	1.6413	625	621	1.1865	1092	745	1.6106	2471	589	4.3808		gi|6648596|gb|AAF21243.1| insulin receptor-like protein precursor [Bombyx mori]
sw20526	373	327		781	722	1.208	389	204		1661	586	2.9439		gi|50838657|dbj|BAD34493.1| Gag-Pol [Ipomoea batatas]
sw20527	1339	1467	0.8405	1189	1343	0.8977	1189	1324	0.9639	4698	600	8.1158
sw20533	547	843	0.6816	1072	1231	0.9275	889	1187	0.8741	3975	550	6.1646		gi|1870170|emb|CAA72182.1| PAI1 protein; plasminogen activator inhibitor I [Sus scrofa] plasminogen activator inhibitor I [Sus scrofa] Plasminogen activator inhibitor-1 precursor (PAI-1) (Endothelial plasminogen activator inhibitor) (PAI)
sw20536	2107	140	19.3455	62	129		349	122		7	118
sw20543	901	803	1.0416	696	699	1.0207	730	616	1.3913	357	1093	0.3824
sw20548	392	587	0.9258	481	623	1.1194	414	862	0.4738	995	500	2.3153		gi|55242209|gb|EAA08043.2| ENSANGP00000012169 [Anopheles gambiae str. PEST] ENSANGP00000012169 [Anopheles gambiae str. PEST]
sw20550	8545	6855	1.1917	13752	11697	1.2609	14803	8716	1.8092	17918	5943	2.4274
sw20566	1136	2489	0.4772	1904	1916	1.1306	1890	2027	1.075	5293	1859	3.1405		gi|38679393|gb|AAR26518.1| antennal cytochrome P450 CYP9 [Mamestra brassicae]
sw20571	1770	1757	1.1196	1914	2331	0.9694	2397	2072	1.2216	12545	1275	8.5529		gi|4521269|dbj|BAA76304.1| endonuclease and reverse transcriptase-like protein [Bombyx mori]
sw20585	663	722	1.1451	1370	1256	1.3046	2243	1262	1.7744	5103	561	7.1702		gi|38679393|gb|AAR26518.1| antennal cytochrome P450 CYP9 [Mamestra brassicae]
sw20622	1604	2106	0.7868	1651	1033	1.6307	467	805	0.6783	204	2106	0.1252		gi|15010430|gb|AAK77263.1| GH03753p [Drosophila melanogaster]
sw20640	2381	3257	0.6451	4583	10221	0.4164	1567	6494	0.2466	164	1807	0.114
sw20657	448	553	1.0478	1022	1089	1.0844	1151	1052	1.1811	3253	522	9.2733		gi|21356425|ref|NP_647840.1| CG10863-PA [Drosophila melanogaster] CG10863-PA [Drosophila melanogaster] BcDNA.GH10614 [Drosophila melanogaster]
sw20712	596	695	0.8627	392	394		322	400	0.974	1231	561	2.7697		gi|72155335|ref|XP_792392.1| PREDICTED: similar to reverse transcriptase family member (XQ19) [Strongylocentrotus purpuratus]
sw20719	1809	3582	0.4552	1294	1940	0.6544	1669	960	1.7771	852	2038	0.4858		gi|66500529|ref|XP_392121.2| PREDICTED: similar to thrombospondin repeat protein 1 [Apis mellifera]
sw20730	14343	16783	0.7671	22836	13277	1.4553	31299	12509	2.8415	809	19555	0.046		gi|38679391|gb|AAR26517.1| antennal cytochrome P450 CYP4 [Mamestra brassicae]
sw20733	990	849	1.1612	462	557	0.9725	225	420	0.7674	36	1048	0.0928		gi|24652852|ref|NP_725091.1| CG13188-PA, isoform A [Drosophila melanogaster] CG13188-PA, isoform A [Drosophila melanogaster]
sw20738	1471	1388	1.2303	2515	2062	1.55	4575	783	6.0358	470	2870	0.2091
sw20743	1920	2576	0.8303	1269	1979	0.8552	2177	3138	0.7086	180	2043	0.1469		gi|20372973|dbj|BAB91156.1| serine protease [Bombyx mori]
sw20784	2855	2333	1.2053	4800	3838	1.2788	4558	3228	1.3183	3004	1379	2.8477		gi|5032009|ref|NP_005600.1| glycogen phosphorylase [Homo sapiens] Glycogen phosphorylase, muscle form (Myophosphorylase) muscle glycogen phosphorylase [Homo sapiens] muscle glycogen phosphorylase [Homo sapiens]
sw20798	1943	2624	0.7595	2261	2763	0.8148	1183	1888	0.6147	116	2559	0.0548		gi|66522768|ref|XP_393945.2| PREDICTED: similar to ENSANGP00000010215 [Apis mellifera]
sw20807	159	233		267	339		164	233		1416	310	6.211		gi|600837|gb|AAC46947.1| mariner transposase mariner transposase
sw20809	5901	4007	1.2589	13438	12970	0.9647	6448	10335	0.622	166	4867	0.0384		gi|19548965|gb|AAL90881.1| cuticle protein 20 [Manduca sexta] Pupal cuticle protein 20 precursor (MsCP20) (MS-PCP20)
sw20810	2972	4578	0.6319	2392	1666	1.4194	2079	1003	2.1955	247	3165	0.0962		gi|50758981|ref|XP_417503.1| PREDICTED: similar to prefoldin 4 [Gallus gallus]
sw20814	9743	4369	1.8149	12496	9237	1.149	7256	3810	1.9274	18594	3026	4.8301		gi|4239700|emb|CAA10770.1| reverse transcriptase-like [Bos taurus]
sw20817	2181	2195	0.9532	2484	1591	1.7039	1842	734	2.9018	330	1576	0.2402		gi|55239913|gb|EAA10144.2| ENSANGP00000011098 [Anopheles gambiae str. PEST] ENSANGP00000011098 [Anopheles gambiae str. PEST]
sw20825	1186	970	1.255	1040	1035	1.1531	2293	1217	2.0381	1055	1099	1.0229		gi|50751045|ref|XP_422233.1| PREDICTED: similar to CGI-01 protein isoform 1 [Gallus gallus]
sw20827	742	1060	0.6868	379	552	0.8571	668	766	0.9753	71	1081	0.1028
sw20833	7873	6449	1.1304	19997	10431	1.6878	11424	6974	1.6105	35791	3566	10.0045		gi|9651929|gb|AAF91316.1| immulectin-2 [Manduca sexta]
sw20834	1416	2458	0.5887	1884	1538	1.3221	615	646	1.1629	520	2307	0.3037
sw20836	1763	882	1.9173	2600	1246	1.9989	1565	1599	1.035	3557	844	4.1742		gi|474339|gb|AAA17752.1| reverse transcriptase [Bombyx mori]
sw20849	1282	1149	1.301	1170	802	1.8239	966	604	1.7939	205	896	0.3213		gi|67475506|ref|XP_653447.1| Viral A-type inclusion protein repeat [Entamoeba histolytica HM-1:IMSS] Viral A-type inclusion protein repeat, putative [Entamoeba histolytica HM-1:IMSS]
sw20862	6406	6993	0.8748	7137	7375	0.9631	5323	5395	1.0595	5599	10483	0.4779		gi|26252146|gb|AAH40811.1| Rbm28 protein [Mus musculus] RNA-binding protein 28 (RNA-binding motif protein 28)
sw20864	2334	2068	1.0281	2369	1944	1.1575	2389	1800	1.4088	3799	1834	2.2658		gi|7542567|gb|AAF63501.1| SP1173 [Drosophila melanogaster]
sw20866	2276	2575	0.9245	2765	3728	0.7395	2101	2926	0.8339	7062	3157	2.3792		gi|20799477|gb|AAM28512.1| acyl-CoA desaturase SexiKSVE [Spodoptera exigua]
sw20886	3793	5139	0.7212	6185	5909	1.0551	9074	8368	1.2253	67	4972	0.0221		gi|24416622|dbj|BAC22502.1| putative pheromone-degrading enzyme [Antheraea polyphemus]
sw20901	1125	152	7.519	31	191		264	179		11	177			No hits found
sw20904	1318	838	1.446	1373	1343	0.9165	1175	585	2.1584	957	867	1.3142		gi|72048028|ref|XP_798369.1| PREDICTED: similar to Putative alpha-mannosidase C20orf31 precursor [Strongylocentrotus purpuratus]
sw20915	15544	8346	1.3076	20440	7878	2.4476	17122	8886	2.0624	15711	6467	2.17		gi|66510575|ref|XP_392939.2| PREDICTED: similar to protein-glutamine gamma-glutamyltransferase (EC 2.3.2.13) - horseshoe crab (Tachypleus tridentatus) [Apis mellifera]
sw20919	5109	4883	0.8133	4754	4128	1.0716	4023	5155	0.8505	1916	4105	0.448
sw20932	832	1024	0.9892	607	763	1.1137	1932	960	2.0248	1089	883	1.3358		gi|21552985|gb|AAM62412.1| UDP-N-acetylgalactosamine: polypeptide N-acetylgalactosaminyltransferase 2; dGalNAc-T2 [Drosophila melanogaster]
sw20935	5387	5000	1.0153	6434	6842	1.051	5396	6871	0.7721	3470	7525	0.3834		gi|55234466|gb|EAA00473.3| ENSANGP00000014085 [Anopheles gambiae str. PEST] ENSANGP00000014085 [Anopheles gambiae str. PEST]
sw20943	3005	2492	1.2571	3628	2576	1.7166	3674	1931	1.7698	586	3279	0.2247		gi|28569894|dbj|BAC57926.1| reverse transcriptase [Bombyx mori]
sw20948	348	416	1.1937	317	343		2207	526	3.9691	1116	508	2.6114		gi|85857628|gb|ABC86349.1| IP13633p [Drosophila melanogaster]
sw20960	951	1008	1.1105	1844	2071	0.9876	1708	2001	0.8314	3517	475	8.0233		gi|72077548|ref|XP_796448.1| PREDICTED: similar to riddle like (86.6 kD) (5O189) [Strongylocentrotus purpuratus]
sw20967	641	574	1.2887	633	647	1.2499	706	673	1.2385	804	400	2.4938		gi|72126996|ref|XP_792372.1| PREDICTED: similar to Condensin subunit 1 (Chromosome condensation-related SMC-associated protein 1) (Chromosome-associated protein D2) (hCAP-D2) (XCAP-D2 homolog) [Strongylocentrotus purpuratus]
sw20971	9549	7241	1.0649	6260	3614	1.7597	7010	5148	1.374	953	7873	0.0989		gi|2738865|gb|AAB94558.1| hemocyte protease-2 [Manduca sexta]
sw20972	7166	5410	1.1563	10341	8941	1.0722	10017	7377	1.2175	284	4734	0.0445		gi|685089|gb|AAC60507.1| trehalase [Bombyx mori] Trehalase precursor (Alpha,alpha-trehalase) (Alpha,alpha-trehalose glucohydrolase) trehalase [Bombyx mori]
sw20980	1507	1357	1.114	3946	1632	2.1134	2924	1704	1.559	5413	1069	5.1812		gi|10907|emb|CAA38531.1| 30K protein [Bombyx mori] Low molecular mass 30 kDa lipoprotein 21G1 precursor
sw20987	868	838	1.0485	529	777	0.8242	489	557	1.0543	2055	839	2.6643		gi|85816002|gb|ABC84370.1| cytochrome P450 [Spodoptera litura]
sw20997	9741	7580	1.0446	10397	12082	0.8273	13133	13824	0.9479	32746	5589	4.7223		gi|72095751|ref|XP_792325.1| PREDICTED: similar to Translocon-associated protein, delta subunit precursor (TRAP-delta) (Signal sequence receptor delta subunit) (SSR-delta) [Strongylocentrotus purpuratus]
sw21009	2615	1720	1.4476	1647	2117	0.8129	1868	800	2.6608	1478	3619	0.3905
sw21022	614	501	1.4757	529	429	1.4957	1210	148	13.6836	32	414	0.1888		gi|59807717|gb|AAH89375.1| Zswim5 protein [Mus musculus]
sw21035	6045	5162	1.0699	7106	7354	0.9064	7906	7698	1.2381	15924	2879	4.722		gi|5733713|gb|AAD49730.1| chrysoptin precursor [Chrysops sp.]
sw21062	1172	1432	0.9125	2225	1521	1.6155	2827	1602	1.8567	1996	822	3.0103		gi|87248657|gb|ABD36381.1| glucose-6-phosphate isomerase [Bombyx mori]
sw21070	8035	8377	0.8833	9308	6080	1.4798	8124	5397	1.5383	1815	8552	0.2468		gi|27374246|gb|AAO01005.1| Pka-R2-PA [Drosophila erecta]
sw21073	8418	5434	1.2367	7901	7356	0.9692	7336	3131	2.1515	5843	6001	0.9278
sw21084	237	1636	0.133	1359	506	2.8334	996	591	1.8427	5997	611	16.9388		gi|27316716|gb|AAO05891.1| streptococcal hemagglutinin protein [Staphylococcus epidermidis ATCC 12228] streptococcal hemagglutinin protein [Staphylococcus epidermidis ATCC 12228]
sw21090	9746	8102	1.0863	16080	9761	1.4533	14826	8696	1.6646	18650	6158	2.5853
sw21098	1786	1433	1.2712	2260	2251	1.0223	2244	3129	0.7559	7722	1191	6.0899		gi|50370224|gb|AAH76913.1| MGC89088 protein [Xenopus tropicalis] MGC89088 protein [Xenopus tropicalis]
sw21115	1871	986	1.6711	1040	902	1.1704	1604	505	3.6479	1086	1379	0.8788		gi|57506562|dbj|BAD86652.1| reverse transcriptase [Bombyx mori]
sw21125	36611	26891	1.0828	40865	26452	1.4608	41415	16447	2.4344	4177	35888	0.1294		gi|29134779|dbj|BAC66140.1| projectin [Procambarus clarkii]
sw21135	4358	2721	1.5763	3680	4255	1.031	6064	2390	2.2742	4022	3825	0.8686		gi|66506650|ref|XP_625203.1| PREDICTED: similar to Dscam [Apis mellifera]
sw21150	1629	1888	0.9294	1747	1831	1.0906	2044	2395	0.9736	3524	1810	2.1997		gi|58394142|ref|XP_320550.2| ENSANGP00000015295 [Anopheles gambiae str. PEST] ENSANGP00000015295 [Anopheles gambiae str. PEST]
sw21151	1929	3126	0.6647	1609	2198	0.8748	738	1288	0.6285	184	3719	0.0725		gi|22003996|dbj|BAC06447.1| chitinase [Haemaphysalis longicornis]
sw21168	845	1215	0.71	889	1188	0.8369	632	1567	0.3847	1576	725	3.1594		gi|54289250|gb|AAV31915.1| glutamine synthetase [Aedes aegypti]
sw21197	1644	1330	1.2288	1242	591	2.2412	3277	1712	1.9275	8	543	0.0613		gi|62637998|gb|AAX92638.1| glucose transporter 8 [Solenopsis invicta]
sw21208	841	1456	0.5701	1012	1170	0.844	886	1055	0.8869	323	1163	0.3349		gi|24644942|ref|NP_649754.1| CG2781-PA [Drosophila melanogaster] CG2781-PA [Drosophila melanogaster]
sw21232	788	506	1.6353	1335	655	2.0853	467	423	1.39	193	411	0.8528		gi|77455420|gb|ABA86519.1| CG11156 [Drosophila erecta]
sw21243	1504	1863	0.7522	1300	1784	0.7517	1162	1730	0.8172	878	2132	0.4258		gi|62079606|gb|AAX61149.1| elongator associated protein [Oreochromis mossambicus]
sw21254	11335	11016	0.9209	14213	12582	1.0192	12869	14646	0.9283	214	10275	0.029		gi|24668346|ref|NP_649357.1| CG14567-PA [Drosophila melanogaster] CG14567-PA [Drosophila melanogaster]
sw21271	16261	9003	1.3545	22563	14283	1.3778	23129	13291	2.1404	46915	2364	16.4713		gi|5733713|gb|AAD49730.1| chrysoptin precursor [Chrysops sp.]
sw21277	3239	3209	0.9381	15245	6852	1.7804	12735	2523	4.1313	3054	1324	2.2978		gi|945383|gb|AAC41580.1| carboxypeptidase Vitellogenic carboxypeptidase precursor
sw21298	781	832	1.0728	706	530	1.4113	705	446	1.7804	60	1065	0.101
sw21299	1392	1354	0.9214	1293	1315	0.9655	1070	1266	0.9579	5459	807	7.9078		gi|76630063|ref|XP_582819.2| PREDICTED: similar to Selenoprotein I [Bos taurus]
sw21301	1228	1294	0.923	1471	1545	0.9857	3336	1512	2.1699	1193	999	1.3514		gi|13359138|dbj|BAB33300.1| neutral endopeptidase 24.11 [Bombyx mori]
sw21303	3943	3146	1.0095	3203	2890	1.0502	1935	2683	0.7986	2101	4201	0.4783
sw21322	407	534	1.0526	1430	1579	1.19	1179	3980	0.3051	5629	567	8.713
sw21345	353	507	0.9347	669	2068	0.416	294	348		52	517	0.2222		gi|29290092|gb|AAO67563.1| Gag protein [Drosophila virilis] Gag protein [Drosophila virilis]
sw21352	2133	1429	1.5995	2352	2359	1.0592	1638	813	2.0601	950	1070	1.1042
sw21369	2516	1620	1.6342	3244	2015	1.6745	2245	1158	1.916	60	2415	0.0491
sw21376	1377	1046	1.3447	1587	927	1.6262	1776	670	2.3864	1197	1253	0.9625		gi|290211|gb|AAB59182.1| adducin-like protein N4 isoform [Drosophila melanogaster]
sw21379	7367	7917	0.6596	7490	6242	1.0815	4637	4555	1.0269	2524	5605	0.3813
sw21395	8732	9548	0.6736	12063	8408	1.1408	5906	6498	1.0527	3395	8795	0.3602
sw21398	19664	18667	0.837	20311	16218	1.1759	10585	12493	1.0064	7121	17822	0.3318
sw21403	1552	1100	1.3815	2609	1650	1.4563	1386	1425	1.0578	290	1436	0.2575
sw21416	1429	1764	0.7788	2073	1653	1.1975	1844	1091	2.0094	1477	1388	1.1265		gi|73946924|ref|XP_541451.2| PREDICTED: similar to alpha isoform of regulatory subunit A, protein phosphatase 2 isoform 1 [Canis familiaris]
sw21419	2184	2693	0.7658	2424	1895	1.3438	864	1986	0.4826	81	2065	0.0669
sw21420	2229	2283	0.9026	2986	2027	1.3712	1253	1236	1.0953	572	2025	0.3278
sw21425	2448	2882	0.9291	3137	2745	1.2748	1562	2328	0.7087	878	2023	0.4863		gi|30524984|emb|CAD31218.1| transposase [Misgolas dereki]
sw21476	21502	16328	0.8779	28489	16983	1.3688	15255	9919	1.7742	9863	16501	0.3565		No hits found
sw21485	3691	68	46.4657	3	75		3019	113	25.6621	3	340			gi|474339|gb|AAA17752.1| reverse transcriptase [Bombyx mori]
sw21516	1210	1216	1.1742	1117	1413	1.0091	1827	866	2.143	1048	1194	0.9425
sw21526	1474	1559	1.0411	1619	1874	0.9909	3474	2147	1.9442	583	1544	0.4873		gi|7716838|gb|AAF68569.1| singed protein [Drosophila simulans] singed protein [Drosophila simulans] singed protein [Drosophila simulans] singed protein [Drosophila simulans] singed protein [Drosophila simulans] singed protein [Drosophila simulans] singed protein [Drosophila simulans] singed protein [Drosophila yakuba]
sw21541	584	686	1.0721	1444	1179	1.4571	729	638	1.1639	171	913	0.2733		gi|157006|gb|AAA28393.1| bicaudalD protein
sw21596	5279	3643	1.2247	6911	4436	1.3579	4959	3235	1.5842	2399	4377	0.4979
sw21631	1398	1857	0.7061	1436	1176	1.3135	508	1299	0.4734	118	1267	0.1458
sw21634	4452	5220	0.825	5944	4820	1.2125	2530	2699	1.0528	1598	3856	0.496		gi|50758374|ref|XP_415892.1| PREDICTED: similar to ubiquitin specific protease 32 [Gallus gallus]
sw21649	7043	7765	0.7616	9139	4845	1.5845	2695	4056	0.7358	1082	4756	0.2748		No hits found
sw21652	871	963	0.8698	1108	1011	1.0806	308	446	0.9088	1118	451	4.0274
sw21658	1353	1829	0.8064	1801	1588	1.1663	635	1005	0.713	272	1535	0.2493		gi|57911623|ref|XP_553654.1| ENSANGP00000027293 [Anopheles gambiae str. PEST] ENSANGP00000027293 [Anopheles gambiae str. PEST]
sw21674	5213	4595	1.0766	8106	4786	1.6046	13651	6061	2.1209	1289	3741	0.345		gi|66566395|ref|XP_623926.1| PREDICTED: similar to GA18544-PA [Apis mellifera]
sw21676	5903	5784	0.7754	7031	5036	1.1918	3478	5658	0.6422	1948	6508	0.2381		gi|87248399|gb|ABD36252.1| Rab-related protein [Bombyx mori]
sw21678	260	255		587	455	1.5239	999	772	1.2744	1382	268	5.6575		gi|68365804|ref|XP_708162.1| PREDICTED: similar to leucine-rich repeat containing protein (42.3 kD) (3H237) isoform 2 [Danio rerio]
sw21680	2274	2164	0.889	2596	1985	1.1602	1366	1400	0.9836	577	1451	0.4473
sw21698	217	284		269	326		210	310		1540	330	4.9535		gi|48099074|ref|XP_394859.1| PREDICTED: similar to ENSANGP00000021628 [Apis mellifera]
sw21709	1854	1797	1.1215	4201	3562	1.3009	3336	2968	1.0853	6158	1623	4.0464		gi|136206|sp|P22297|TRF_MANSE Transferrin precursor transferrin
sw21718	275	347		172	310		163	269		800	541	2.1107		gi|2997682|gb|AAC08573.1| F12F6.6 [Drosophila heteroneura]
sw21719	5335	6192	0.8418	5462	2642	2.2946	6258	3201	2.0412	4461	3268	1.3742		gi|66521545|ref|XP_391936.2| PREDICTED: similar to Tubulin alpha-1 chain [Apis mellifera]
sw21726	3718	2737	1.4066	5344	4321	1.3372	3989	3887	1.1741	899	4883	0.2105		gi|66516079|ref|XP_393297.2| PREDICTED: similar to CG6803-PD, isoform D [Apis mellifera]
sw21738	848	837	1.1834	1977	1548	1.3612	1184	1395	0.9347	4962	861	5.5493		gi|49022793|dbj|BAD23983.1| broad-complex Z1-isoform [Bombyx mori] broad-complex B-Z1 isoform [Bombyx mori] broad-complex A-Z1 isoform [Bombyx mori] broad-complex Z1-isoform [Bombyx mori] Broad-Complex isoform Z1 [Bombyx mori] Broad-Complex isoform Z1 [Bombyx mori]
sw21759	7255	5041	1.1689	14271	10000	1.282	3144	4253	0.7803	7490	3610	2.1042
sw21768	1786	1010	1.6253	3051	1658	1.5733	1151	1090	1.0573	123	1568	0.0883
sw21791	1194	803	1.5275	1271	1278	1.0122	1082	542	2.3535	780	770	1.296
sw21822	4725	4063	1.1651	7467	4642	1.6536	4920	3495	1.4547	531	4021	0.1545
sw21831	9920	9231	0.8568	11394	7698	1.3764	4608	5657	0.9814	1812	8870	0.1587		gi|6330416|dbj|BAA86515.1| KIAA1201 protein [Homo sapiens]
sw21833	4133	9052	0.4299	1688	12520	0.1198	144	2649	0.0568	145	5770	0.0454
sw21834	4836	3506	1.3851	4847	3167	1.5621	20307	969	15.9902	333	4319	0.1072		gi|28380950|gb|AAO41442.1| RE39251p [Drosophila melanogaster]
sw21842	3190	281	12.8395	110	284		916	259	3.3837	101	254			gi|4322670|gb|AAD16120.1| dentin phosphoryn [Homo sapiens]
sw21845	1361	1657	0.8656	2318	1817	1.2257	1395	1285	1.099	488	1391	0.4679		gi|28972251|dbj|BAC65579.1| mKIAA0493 protein [Mus musculus]
sw21850	5348	4682	1.0979	7443	4093	1.8992	5946	2552	2.3046	17339	2283	6.5889
sw21860	2165	1286	1.4598	3697	2316	1.4351	570	1187	0.4872	221	1911	0.1333		gi|48870343|ref|ZP_00323067.1| COG4932: Predicted outer membrane protein [Pediococcus pentosaceus ATCC 25745]
sw21863	368	201		1250	687	1.9495	12	1724	0.0189	5	985	0.0243		gi|3287770|sp|P81225|CU21_LOCMI Cuticle protein 21 (LM-ACP 21)
sw21880	1291	882	1.3659	1201	910	1.1781	917	481	2.1686	1353	1242	1.1908		gi|6164595|gb|AAF04457.1| lacunin [Manduca sexta]
sw21888	12024	6181	1.3941	10546	8632	0.9573	5361	6743	0.8495	4419	8302	0.4366		gi|70909519|emb|CAJ17183.1| ribosomal protein S11e [Eucinetus sp. APV-2005]
sw21891	1401	1302	1.2613	2706	1423	2.425	8114	1394	4.8479	8	420	0.1335
sw21896	5289	3731	1.4215	4738	5255	1.001	7788	3099	2.6849	5779	5308	0.9136		gi|72168410|ref|XP_795190.1| PREDICTED: similar to endonuclease/exonuclease/phosphatase family and RNA-directed DNA polymerase (4O953), partial [Strongylocentrotus purpuratus]
sw21899	1151	1668	0.8296	1160	1977	0.7879	1977	2589	0.7767	7431	891	6.4213		gi|3510719|gb|AAC33576.1| immunolectin-A precursor [Manduca sexta]
sw21905	26711	23244	0.9251	35998	22620	1.6464	44795	18160	3.0389	34627	16781	1.5354		gi|60730230|emb|CAI63975.1| actin [Ixodes ricinus] actin [Boophilus microplus]
sw21906	7935	6697	1.1194	7688	3039	2.7116	8713	4164	2.5322	4507	7458	0.6148		gi|1296532|emb|CAA66218.1| Cytoplasmin actin A3a [Helicoverpa armigera] non-muscle actin [Manduca sexta] cytoplasmic actin A3a1 [Helicoverpa zea] cytoplasmic actin A3b [Helicoverpa zea] Actin, cytoplasmic A3a
sw21907	786	1012	0.9522	403	429	1.3776	1282	651	2.2118	813	842	1.1408		gi|37181640|gb|AAQ89578.1| actin [Panagrellus redivivus] actin [Panagrellus redivivus]
sw21913	3756	4711	0.7959	4425	6275	0.8219	6566	8038	0.8872	8873	3099	2.5742		gi|62288321|gb|AAX78436.1| acetoacetyl-CoA thiolase [Dendroctonus jeffreyi]
sw21921	1791	2163	0.8701	2653	3350	0.9159	3057	3050	0.9557	8642	1645	3.7203		gi|72044641|ref|XP_788716.1| PREDICTED: similar to branched chain keto acid dehydrogenase E1, alpha polypeptide [Strongylocentrotus purpuratus]
sw21938	5830	8946	0.5659	8397	14876	0.4888	5813	6060	1.0303	6366	7063	0.7864		gi|12585497|sp|Q9U5N0|VATH_MANSE Vacuolar ATP synthase subunit H (V-ATPase H subunit) (Vacuolar proton pump H subunit) (Vacuolar proton pump subunit SFD) vacuolar ATPase subunit H [Manduca sexta]
sw21940	15071	9728	1.1635	27278	11198	1.7165	19193	9156	1.8816	1800	15604	0.0786		gi|66516079|ref|XP_393297.2| PREDICTED: similar to CG6803-PD, isoform D [Apis mellifera]
sw21941	2259	1436	1.6805	1675	2023	0.9222	3070	1237	2.4311	2268	1934	1.1602		gi|8886039|gb|AAF80355.1| acyl CoA desaturase [Bombyx mori]
sw21943	3436	3452	0.8686	4266	3491	1.192	5255	4830	1.1012	1324	3182	0.4515		gi|25012685|gb|AAN71437.1| RE56202p [Drosophila melanogaster]
sw21948	11937	7947	1.1646	16266	11450	1.0847	12005	10202	1.0726	2690	10506	0.1852		gi|87248255|gb|ABD36180.1| tyrosine 3-monooxygenase protein zeta polypeptide [Bombyx mori]
sw21951	31507	16020	1.3452	40409	26159	1.3041	32185	28984	1.1481	4912	30127	0.1555		gi|87248175|gb|ABD36140.1| muscle LIM protein [Bombyx mori]
sw21952	8754	10870	0.6193	13149	8319	1.2323	10648	6375	1.5134	877	8646	0.0758		gi|87248175|gb|ABD36140.1| muscle LIM protein [Bombyx mori]
sw21956	1951	2363	0.7382	2124	1203	1.5585	2609	950	2.5666	4044	1368	3.216		gi|55242381|gb|EAA44944.2| ENSANGP00000024531 [Anopheles gambiae str. PEST] ENSANGP00000024531 [Anopheles gambiae str. PEST]
sw21958	814	752	1.1782	713	787	1.0522	768	924	0.9299	145	1081	0.194		gi|49115013|gb|AAH72857.1| MGC80254 protein [Xenopus laevis] Psf1 [Xenopus laevis]
sw21974	1623	1473	1.132	1462	1026	1.5463	832	608	1.723	351	1287	0.326		gi|28828976|gb|AAO51556.1| similar to Plasmodium falciparum. Protein kinase, putative [Dictyostelium discoideum]
sw22015	2390	3197	0.6588	8880	7944	1.0616	7115	3323	2.7677	4783	939	4.4991		gi|4699766|pdb|1SEK| The Structure Of Active Serpin K From Manduca Sexta And A Model For Serpin-Protease Complex Formation
sw22021	1288	1104	1.2508	1640	1359	1.3043	738	552	1.5935	1715	758	2.3372		gi|28274852|gb|AAO25691.1| ankyrin repeat protein E4_2 [synthetic construct]
sw22032	1862	1400	1.2307	1659	1417	1.1296	2107	906	2.382	1921	1967	1.2034
sw22043	6561	7578	0.6374	5581	10878	0.4793	6209	8513	0.8512	28864	11582	1.984		gi|52421209|dbj|BAD51475.1| gloverin-like protein 3 [Bombyx mori]
sw22045	2274	1364	1.5859	1852	1694	1.0872	1914	778	2.1949	1733	1835	1.0354
sw22074	3038	3317	0.9228	5963	3399	1.5761	7632	3355	2.4358	20086	2603	7.4238		gi|102972|pir||A28068 microvitellogenin precursor - tobacco hornworm MICROVITELLOGENIN PRECURSOR microvitellogenin microvitellogenin
sw22075	1229	819	1.3598	876	1003	0.8689	986	559	2.0528	921	1064	1.0027
sw22077	2616	1244	1.9176	7067	1988	3.221	12452	2951	3.7612	16466	930	12.0008		gi|217280|dbj|BAA02093.1| hemolymph protein [Bombyx mori]
sw22099	496	361	1.9256	2154	1168	2.2117	2068	1181	1.8943	1955	194	10.4126		gi|66518233|ref|XP_392596.2| PREDICTED: similar to putative alcohol dehydrogenase [Apis mellifera]
sw22129	7661	5794	1.2213	9856	8957	1.0642	13451	10663	1.2469	41019	2520	10.1101		gi|72133877|ref|XP_788695.1| PREDICTED: similar to predicted CDS, reverse transcriptase family member (1O881) [Strongylocentrotus purpuratus]
sw22167	176	131		623	273	2.4834	835	318	3.3202	1046	130	12.8746		gi|57506558|dbj|BAD86650.1| reverse transcriptase [Bombyx mori]
sw22179	443	497	1.0406	1298	908	1.6024	225	412	0.7484	43	1450	0.0605		gi|66525306|ref|XP_394081.2| PREDICTED: hypothetical protein XP_394081 [Apis mellifera]
sw22180	864	1002	0.8736	560	797	0.7556	683	1124	0.6122	267	869	0.4524
sw22190	10559	7346	1.2549	10299	10119	0.9819	10884	3706	3.3696	725	11115	0.0788		gi|18043928|gb|AAH19366.1| SEC63-like [Mus musculus] SEC63-like [Mus musculus] Translocation protein SEC63 homolog
sw22198	40345	41810	0.8012	49794	21359	2.1324	19482	30750	0.6895	1610	49654	0.0276		gi|22531680|dbj|BAC10661.1| cuticle protein [Bombyx mori]
sw22202	753	687	1.302	614	675	1.1014	811	402	2.2001	657	841	1.0321
sw22209	832	206	4.9499	32	422	0.18	23	157		224	356			gi|66551411|ref|XP_397170.2| PREDICTED: similar to Probable cytochrome P450 301a1, mitochondrial precursor (CYPCCCIA1) [Apis mellifera]
sw22212	7128	4443	1.2989	10621	7849	1.1664	9241	6948	1.424	23506	3050	11.6657		gi|10801172|gb|AAG23413.1| POP1D protein [Gallus gallus]
sw22215	8074	7526	0.8707	11505	6371	1.7122	13289	5243	3.4317	28014	2347	12.1098		gi|17298113|dbj|BAB78525.1| fibrillin-like protein [Bombyx mori]
sw22224	10256	8675	0.9236	11340	11316	0.8201	6902	7982	0.9594	6684	12805	0.4633		gi|66520183|ref|XP_392696.2| PREDICTED: similar to carboxylesterase [Apis mellifera]
sw22249	1942	2064	0.9234	1931	1791	1.1005	2014	2313	0.9279	5	1914	0.0121		gi|86450731|gb|ABC96701.1| yellow8 [Bombyx mori]
sw22252	2412	1819	1.1257	2717	1329	1.9251	1967	1138	1.7874	302	1616	0.2163		gi|35902754|ref|NP_919346.1| adrenergic, alpha-2D-, receptor b [Danio rerio] alpha2Db-adrenoceptor [Danio rerio] Alpha-2Db adrenergic receptor (Alpha-2Db adrenoceptor) (Alpha-2Db adrenoreceptor) (Alpha(2Db)AR)
[truncated: 145 more rows]
