# Supplementary material for: Microarray Analysis of the Juvenile Hormone Response in Larval Integument of the Silkworm, Bombyx mori
Source: Int J Genomics. 2014 Apr 6;2014:426025. doi: 10.1155/2014/426025 (PMC3997853; doi:10.1155/2014/426025)
Supplement: Supplementary file 1 — Supplementary Figure 1: Hierarchical clustering of a total of 8,670 genes expressed in the silkworm integument samples. A gene was considered to be expressed in a integument sample if its expression signal intensity was greater than 400 units. Supplementary Table 1: All real time RT-PCR primers used in this study. Supplementary Table 2: The list of 8,670 genes expressed in the silkworm integument samples. Integument-E: the integument sample treated with JHA methoprene. Integument-C: the integument sample treated with pure acetone. Supplementary Table 3: The list of 2,143 JHA-modulated genes with 2.0-fold expression change after JHA application. Supplementary Table 4: Correlation between microarray data and real time RT-PCR results. A good correlation was defined if the Pearson correlation coefficient (r) is greater than 0.7. Supplementary Table 5: All KEGG pathways that JHA-modulated genes were involved in. Supplementary Table 6: Coexpression classes of all JHA-modulated genes. Supplementary Table 7: JHA-induced genes that contain the binding motifs of Kr-h1 in their upstream UTR regions. Supplementary Table 8: JHA-modulated genes that are involved in each KEGG pathway. [file 426025.f1.zip › Supplementary materials/Table S4.xls]

## Sheet: Sheet1
Table S4 Correlation between microarray data and real time RT-PCR results
Sort	Probe	Gene annotation	Microarray (ratio)				Real time RT-PCR (ratio)				Pearson correlation coefficient	KEGG pathway
			12 Hat	24 Hat	36 Hat	48 Hat	12 Hat	24 Hat	36 Hat	48 Hat
Up-regulation	sw20525	Insulin receptor	1.6413	1.1865	1.6106	4.3808	1.70286	2.11958	1.52227	2.62082	0.782453	Insulin signalling
	sw05025	Beta-galactosidase	1.1842	1.3933	2.1464	7.9901	1.09953	0.861628	2.00881	3.19391	0.931711	Carbohydrate metabolism
	sw11819	Cathepsin D	1.2698	1.4488	3.1089	4.1638	1.34671	1.2322	2.10869	4.671	0.919702	Protein processing
	sw18931	Alpha 1,2 mannosidase	1.2646	1.7024	4.0924	12.7044	2.81559	1.25618	1.88949	4.24171	0.81669	Glycan metabolism
	sw12347	Cathepsin B	1.3202	1.1595	2.0187	15.111	1.31142	1.0376	1.14314	2.14228	0.973535	Protein processing
Down-regulation	sw13482	Tyrosine 3-monooxygenase	0.7783	0.664	0.2307	0.0296	1.86684	0.749058	0.644882	0.313337	0.81892	Amino acid metabolism
	sw13277	Vacuolar ATP synthase subunit G	0.4965	0.4747	0.8375	0.6693	0.243899	0.341315	0.411007	0.724909	0.437708	Energy metabolism
No change	sw15455	Mitochondrial ATP synthase regulatory component factor B	1.1433	0.9544	0.916	1.1516	1.06844	1.00095	1.13499	1.10702	0.0827053	Unclassfied
	sw02210	26S protease regulatory subunit 7	0.9057	0.9681	1.3242	1.0556	1.10001	0.762276	1.19293	1.34049	0.401907	Unclassfied
	sw20262	ATP synthase	1.1021	0.8736	1.0256	1.013	0.885468	0.809706	0.846886	0.87297	0.928937	Unclassfied
