# Supplementary material for: Microarray Analysis of the Juvenile Hormone Response in Larval Integument of the Silkworm, Bombyx mori
Source: Int J Genomics. 2014 Apr 6;2014:426025. doi: 10.1155/2014/426025 (PMC3997853; doi:10.1155/2014/426025)
Supplement: Supplementary file 1 — Supplementary Figure 1: Hierarchical clustering of a total of 8,670 genes expressed in the silkworm integument samples. A gene was considered to be expressed in a integument sample if its expression signal intensity was greater than 400 units. Supplementary Table 1: All real time RT-PCR primers used in this study. Supplementary Table 2: The list of 8,670 genes expressed in the silkworm integument samples. Integument-E: the integument sample treated with JHA methoprene. Integument-C: the integument sample treated with pure acetone. Supplementary Table 3: The list of 2,143 JHA-modulated genes with 2.0-fold expression change after JHA application. Supplementary Table 4: Correlation between microarray data and real time RT-PCR results. A good correlation was defined if the Pearson correlation coefficient (r) is greater than 0.7. Supplementary Table 5: All KEGG pathways that JHA-modulated genes were involved in. Supplementary Table 6: Coexpression classes of all JHA-modulated genes. Supplementary Table 7: JHA-induced genes that contain the binding motifs of Kr-h1 in their upstream UTR regions. Supplementary Table 8: JHA-modulated genes that are involved in each KEGG pathway. [file 426025.f1.zip › Supplementary materials/Table S5.xls]

## Sheet: Integument
Table S5 KEGG pathways that JHA-modulated genes were involved in
Probes of genes in KEGG pathways		KEGG pathway ID	Gene description
Metabolism
Carbohydrate metabolism
	Glycolysis / Gluconeogenesis
	sw21062	K01810	GPI, pgi; glucose-6-phosphate isomerase [EC:5.3.1.9]
	sw04448	K03841	FBP, fbp; fructose-1,6-bisphosphatase I [EC:3.1.3.11]
	sw06691	K01623	ALDO; fructose-bisphosphate aldolase, class I [EC:4.1.2.13]
	sw19274	K01689	ENO, eno; enolase [EC:4.2.1.11]
	sw22892	K00873	PK, pyk; pyruvate kinase [EC:2.7.1.40]
	sw10994	K00002	AKR1A1, adh; alcohol dehydrogenase (NADP+) [EC:1.1.1.2]
	sw09712	K00128	E1.2.1.3; aldehyde dehydrogenase (NAD+) [EC:1.2.1.3]
	sw00132	K14085	ALDH7A1; aldehyde dehydrogenase family 7 member A1 [EC:1.2.1.31 1.2.1.8 1.2.1.3]
	sw18911	K00129	E1.2.1.5; aldehyde dehydrogenase (NAD(P)+) [EC:1.2.1.5]
	sw03637	K01785	E5.1.3.3, galM; aldose 1-epimerase [EC:5.1.3.3]
	sw19777	K01785	E5.1.3.3, galM; aldose 1-epimerase [EC:5.1.3.3]
	sw06503	K01085	agp; glucose-1-phosphatase [EC:3.1.3.10]
	sw17679	K01835	pgm; phosphoglucomutase [EC:5.4.2.2]
	sw17859	K01835	pgm; phosphoglucomutase [EC:5.4.2.2]
	Citrate cycle (TCA cycle)
	sw10937	K01681	ACO, acnA; aconitate hydratase 1 / homoaconitase [EC:4.2.1.3 4.2.1.-]
	sw20350	K01681	ACO, acnA; aconitate hydratase 1 / homoaconitase [EC:4.2.1.3 4.2.1.-]
	sw06329	K00031	IDH1, IDH2, icd; isocitrate dehydrogenase [EC:1.1.1.42]
	sw13400	K00030	IDH3; isocitrate dehydrogenase (NAD+) [EC:1.1.1.41]
	sw01836	K00030	IDH3; isocitrate dehydrogenase (NAD+) [EC:1.1.1.41]
	sw10755	K00164	OGDH, sucA; 2-oxoglutarate dehydrogenase E1 component [EC:1.2.4.2]
	sw05999	K00234	SDHA, SDH1; succinate dehydrogenase (ubiquinone) flavoprotein subunit [EC:1.3.5.1]
	sw08124	K00237	SDHD, SDH4; succinate dehydrogenase (ubiquinone) membrane anchor subunit
	sw06088	K00025	MDH1; malate dehydrogenase [EC:1.1.1.37]
	sw14808	K00026	MDH2; malate dehydrogenase [EC:1.1.1.37]
	sw01281	K01958	PC, pyc; pyruvate carboxylase [EC:6.4.1.1]
	Pentose phosphate pathway
	sw21062	K01810	GPI, pgi; glucose-6-phosphate isomerase [EC:5.3.1.9]
	sw00611	K01057	PGLS, pgl, devB; 6-phosphogluconolactonase [EC:3.1.1.31]
	sw01471	K00033	E1.1.1.44, PGD, gnd; 6-phosphogluconate dehydrogenase [EC:1.1.1.44]
	sw00306	K00615	E2.2.1.1, tktA, tktB; transketolase [EC:2.2.1.1]
	sw14215	K00616	E2.2.1.2, talA, talB; transaldolase [EC:2.2.1.2]
	sw17679	K01835	pgm; phosphoglucomutase [EC:5.4.2.2]
	sw17859	K01835	pgm; phosphoglucomutase [EC:5.4.2.2]
	sw04154	K00948	PRPS, prsA; ribose-phosphate pyrophosphokinase [EC:2.7.6.1]
	sw06691	K01623	ALDO; fructose-bisphosphate aldolase, class I [EC:4.1.2.13]
	sw04448	K03841	FBP, fbp; fructose-1,6-bisphosphatase I [EC:3.1.3.11]
	Pentose and glucuronate interconversions
	sw22710	K00699	UGT; glucuronosyltransferase [EC:2.4.1.17]
	sw19163	K00699	UGT; glucuronosyltransferase [EC:2.4.1.17]
	sw18729	K00699	UGT; glucuronosyltransferase [EC:2.4.1.17]
	sw06973	K00699	UGT; glucuronosyltransferase [EC:2.4.1.17]
	sw13973	K00012	UGDH, ugd; UDPglucose 6-dehydrogenase [EC:1.1.1.22]
	sw12759	K00963	UGP2, galU, galF; UTP--glucose-1-phosphate uridylyltransferase [EC:2.7.7.9]
	sw07985	K13247	CRYL1; L-gulonate 3-dehydrogenase [EC:1.1.1.45]
	sw07418	K00011	E1.1.1.21, AKR1; aldehyde reductase [EC:1.1.1.21]
	sw10579	K00011	E1.1.1.21, AKR1; aldehyde reductase [EC:1.1.1.21]
	sw17644	K00011	E1.1.1.21, AKR1; aldehyde reductase [EC:1.1.1.21]
	sw05953	K03331	DCXR; L-xylulose reductase [EC:1.1.1.10]
	sw03726	K03331	DCXR; L-xylulose reductase [EC:1.1.1.10]
	sw21098	K00078	DHDH; dihydrodiol dehydrogenase / D-xylose 1-dehydrogenase (NADP) [EC:1.3.1.20 1.1.1.179]
	sw09712	K00128	E1.2.1.3; aldehyde dehydrogenase (NAD+) [EC:1.2.1.3]
	Fructose and mannose metabolism
	sw15867	K02377	E1.1.1.271, fcl; GDP-L-fucose synthase [EC:1.1.1.271]
	sw16815	K02377	E1.1.1.271, fcl; GDP-L-fucose synthase [EC:1.1.1.271]
	sw04448	K03841	FBP, fbp; fructose-1,6-bisphosphatase I [EC:3.1.3.11]
	sw19662	K00100	E1.1.1.-; [EC:1.1.1.-]
	sw22929	K00100	E1.1.1.-; [EC:1.1.1.-]
	sw17808	K00008	E1.1.1.14, gutB; L-iditol 2-dehydrogenase [EC:1.1.1.14]
	sw07418	K00011	E1.1.1.21, AKR1; aldehyde reductase [EC:1.1.1.21]
	sw10579	K00011	E1.1.1.21, AKR1; aldehyde reductase [EC:1.1.1.21]
	sw17644	K00011	E1.1.1.21, AKR1; aldehyde reductase [EC:1.1.1.21]
	sw06691	K01623	ALDO; fructose-bisphosphate aldolase, class I [EC:4.1.2.13]
	Galactose metabolism
	sw11414	K01784	galE, GALE; UDP-glucose 4-epimerase [EC:5.1.3.2]
	sw12759	K00963	UGP2, galU, galF; UTP--glucose-1-phosphate uridylyltransferase [EC:2.7.7.9]
	sw17679	K01835	pgm; phosphoglucomutase [EC:5.4.2.2]
	sw17859	K01835	pgm; phosphoglucomutase [EC:5.4.2.2]
	sw05025	K12309	GLB1, ELNR1; beta-galactosidase [EC:3.2.1.23]
	sw07028	K01189	GLA; alpha-galactosidase [EC:3.2.1.22]
	sw09747	K01189	GLA; alpha-galactosidase [EC:3.2.1.22]
	sw07418	K00011	E1.1.1.21, AKR1; aldehyde reductase [EC:1.1.1.21]
	sw10579	K00011	E1.1.1.21, AKR1; aldehyde reductase [EC:1.1.1.21]
	sw17644	K00011	E1.1.1.21, AKR1; aldehyde reductase [EC:1.1.1.21]
	sw03428	K01193	E3.2.1.26, sacA; beta-fructofuranosidase [EC:3.2.1.26]
	sw08156	K01187	E3.2.1.20, malZ; alpha-glucosidase [EC:3.2.1.20]
	Ascorbate and aldarate metabolism
	sw13973	K00012	UGDH, ugd; UDPglucose 6-dehydrogenase [EC:1.1.1.22]
	sw22710	K00699	UGT; glucuronosyltransferase [EC:2.4.1.17]
	sw19163	K00699	UGT; glucuronosyltransferase [EC:2.4.1.17]
	sw18729	K00699	UGT; glucuronosyltransferase [EC:2.4.1.17]
	sw06973	K00699	UGT; glucuronosyltransferase [EC:2.4.1.17]
	sw03217	K00469	MIOX; inositol oxygenase [EC:1.13.99.1]
	sw09712	K00128	E1.2.1.3; aldehyde dehydrogenase (NAD+) [EC:1.2.1.3]
	sw00132	K14085	ALDH7A1; aldehyde dehydrogenase family 7 member A1 [EC:1.2.1.31 1.2.1.8 1.2.1.3]
	Starch and sucrose metabolism
	sw03428	K01193	E3.2.1.26, sacA; beta-fructofuranosidase [EC:3.2.1.26]
	sw08156	K01187	E3.2.1.20, malZ; alpha-glucosidase [EC:3.2.1.20]
	sw11637	K01188	E3.2.1.21; beta-glucosidase [EC:3.2.1.21]
	sw19262	K01188	E3.2.1.21; beta-glucosidase [EC:3.2.1.21]
	sw04028	K01188	E3.2.1.21; beta-glucosidase [EC:3.2.1.21]
	sw09024	K16055	TPS; trehalose 6-phosphate synthase/phosphatase [EC:2.4.1.15 3.1.3.12]
	sw20972	K01194	E3.2.1.28, treA, treF; alpha,alpha-trehalase [EC:3.2.1.28]
	sw13973	K00012	UGDH, ugd; UDPglucose 6-dehydrogenase [EC:1.1.1.22]
	sw22710	K00699	UGT; glucuronosyltransferase [EC:2.4.1.17]
	sw19163	K00699	UGT; glucuronosyltransferase [EC:2.4.1.17]
	sw18729	K00699	UGT; glucuronosyltransferase [EC:2.4.1.17]
	sw06973	K00699	UGT; glucuronosyltransferase [EC:2.4.1.17]
	sw12759	K00963	UGP2, galU, galF; UTP--glucose-1-phosphate uridylyltransferase [EC:2.7.7.9]
	sw17679	K01835	pgm; phosphoglucomutase [EC:5.4.2.2]
	sw17859	K01835	pgm; phosphoglucomutase [EC:5.4.2.2]
	sw21062	K01810	GPI, pgi; glucose-6-phosphate isomerase [EC:5.3.1.9]
	sw03754	K00700	glgB; 1,4-alpha-glucan branching enzyme [EC:2.4.1.18]
	sw20784	K00688	E2.4.1.1, glgP, PYG; starch phosphorylase [EC:2.4.1.1]
	sw13002	K01176	E3.2.1.1, amyA, malS; alpha-amylase [EC:3.2.1.1]
	Amino sugar and nucleotide sugar metabolism
	sw09267	K01183	E3.2.1.14; chitinase [EC:3.2.1.14]
	sw17365	K01183	E3.2.1.14; chitinase [EC:3.2.1.14]
	sw08485	K01183	E3.2.1.14; chitinase [EC:3.2.1.14]
	sw19182	K12373	HEXA_B; hexosaminidase [EC:3.2.1.52]
	sw18447	K12373	HEXA_B; hexosaminidase [EC:3.2.1.52]
	sw20215	K12373	HEXA_B; hexosaminidase [EC:3.2.1.52]
	sw22618	K12373	HEXA_B; hexosaminidase [EC:3.2.1.52]
	sw11659	K05304	NANS, SAS; sialic acid synthase [EC:2.5.1.56 2.5.1.57]
	sw12447	K05304	NANS, SAS; sialic acid synthase [EC:2.5.1.56 2.5.1.57]
	sw14631	K01639	E4.1.3.3, nanA, NPL; N-acetylneuraminate lyase [EC:4.1.3.3]
	sw08657	K00698	CHS1; chitin synthase [EC:2.4.1.16]
	sw04397	K00621	E2.3.1.4, GNA1; glucosamine-phosphate N-acetyltransferase [EC:2.3.1.4]
	sw21062	K01810	GPI, pgi; glucose-6-phosphate isomerase [EC:5.3.1.9]
	sw17679	K01835	pgm; phosphoglucomutase [EC:5.4.2.2]
	sw17859	K01835	pgm; phosphoglucomutase [EC:5.4.2.2]
	sw12759	K00963	UGP2, galU, galF; UTP--glucose-1-phosphate uridylyltransferase [EC:2.7.7.9]
	sw13973	K00012	UGDH, ugd; UDPglucose 6-dehydrogenase [EC:1.1.1.22]
	sw11414	K01784	galE, GALE; UDP-glucose 4-epimerase [EC:5.1.3.2]
	sw15867	K02377	E1.1.1.271, fcl; GDP-L-fucose synthase [EC:1.1.1.271]
	sw16815	K02377	E1.1.1.271, fcl; GDP-L-fucose synthase [EC:1.1.1.271]
	Pyruvate metabolism
	sw22892	K00873	PK, pyk; pyruvate kinase [EC:2.7.1.40]
	sw09712	K00128	E1.2.1.3; aldehyde dehydrogenase (NAD+) [EC:1.2.1.3]
	sw00132	K14085	ALDH7A1; aldehyde dehydrogenase family 7 member A1 [EC:1.2.1.31 1.2.1.8 1.2.1.3]
	sw07767	K01067	E3.1.2.1, ACH1; acetyl-CoA hydrolase [EC:3.1.2.1]
	sw09857	K01069	E3.1.2.6, gloB; hydroxyacylglutathione hydrolase [EC:3.1.2.6]
	sw07418	K00011	E1.1.1.21, AKR1; aldehyde reductase [EC:1.1.1.21]
	sw10579	K00011	E1.1.1.21, AKR1; aldehyde reductase [EC:1.1.1.21]
	sw17644	K00011	E1.1.1.21, AKR1; aldehyde reductase [EC:1.1.1.21]
	sw01916	K00029	E1.1.1.40, maeB; malate dehydrogenase (oxaloacetate-decarboxylating)(NADP+) [EC:1.1.1.40]
	sw01281	K01958	PC, pyc; pyruvate carboxylase [EC:6.4.1.1]
	sw06088	K00025	MDH1; malate dehydrogenase [EC:1.1.1.37]
	sw14808	K00026	MDH2; malate dehydrogenase [EC:1.1.1.37]
	sw08612	K01007	pps, ppsA; pyruvate, water dikinase [EC:2.7.9.2]
	sw21913	K00626	E2.3.1.9, atoB; acetyl-CoA C-acetyltransferase [EC:2.3.1.9]
	sw22915	K00626	E2.3.1.9, atoB; acetyl-CoA C-acetyltransferase [EC:2.3.1.9]
	Glyoxylate and dicarboxylate metabolism
	sw06088	K00025	MDH1; malate dehydrogenase [EC:1.1.1.37]
	sw14808	K00026	MDH2; malate dehydrogenase [EC:1.1.1.37]
	sw10937	K01681	ACO, acnA; aconitate hydratase 1 / homoaconitase [EC:4.2.1.3 4.2.1.-]
	sw20350	K01681	ACO, acnA; aconitate hydratase 1 / homoaconitase [EC:4.2.1.3 4.2.1.-]
	sw21913	K00626	E2.3.1.9, atoB; acetyl-CoA C-acetyltransferase [EC:2.3.1.9]
	sw22915	K00626	E2.3.1.9, atoB; acetyl-CoA C-acetyltransferase [EC:2.3.1.9]
	sw09451	K11517	HAO; (S)-2-hydroxy-acid oxidase [EC:1.1.3.15]
	sw16181	K11517	HAO; (S)-2-hydroxy-acid oxidase [EC:1.1.3.15]
	sw03619	K03781	katE, CAT, catB, srpA; catalase [EC:1.11.1.6]
	sw01800	K00830	AGXT; alanine-glyoxylate transaminase / serine-glyoxylate transaminase / serine-pyruvate transaminase [EC:2.6.1.44 2.6.1.45 2.6.1.51]
	sw03153	K01915	glnA; glutamine synthetase [EC:6.3.1.2]
	sw07091	K01915	glnA; glutamine synthetase [EC:6.3.1.2]
	sw21168	K01915	glnA; glutamine synthetase [EC:6.3.1.2]
	sw03328	K00600	glyA, SHMT; glycine hydroxymethyltransferase [EC:2.1.2.1]
	sw11858	K00600	glyA, SHMT; glycine hydroxymethyltransferase [EC:2.1.2.1]
	sw03241	K02437	gcvH, GCSH; glycine cleavage system H protein
	sw16358	K01816	E5.3.1.22, gip; hydroxypyruvate isomerase [EC:5.3.1.22]
	sw16392	K01816	E5.3.1.22, gip; hydroxypyruvate isomerase [EC:5.3.1.22]
	Propanoate metabolism
	sw21913	K00626	E2.3.1.9, atoB; acetyl-CoA C-acetyltransferase [EC:2.3.1.9]
	sw22915	K00626	E2.3.1.9, atoB; acetyl-CoA C-acetyltransferase [EC:2.3.1.9]
	sw19440	K07511	ECHS1; enoyl-CoA hydratase [EC:4.2.1.17]
	sw03110	K13524	ABAT; 4-aminobutyrate aminotransferase / (S)-3-amino-2-methylpropionate transaminase [EC:2.6.1.19 2.6.1.22]
	sw09712	K00128	E1.2.1.3; aldehyde dehydrogenase (NAD+) [EC:1.2.1.3]
	sw00132	K14085	ALDH7A1; aldehyde dehydrogenase family 7 member A1 [EC:1.2.1.31 1.2.1.8 1.2.1.3]
	Butanoate metabolism
	sw21913	K00626	E2.3.1.9, atoB; acetyl-CoA C-acetyltransferase [EC:2.3.1.9]
	sw22915	K00626	E2.3.1.9, atoB; acetyl-CoA C-acetyltransferase [EC:2.3.1.9]
	sw19440	K07511	ECHS1; enoyl-CoA hydratase [EC:4.2.1.17]
	sw19662	K00100	E1.1.1.-; [EC:1.1.1.-]
	sw22929	K00100	E1.1.1.-; [EC:1.1.1.-]
	sw03110	K13524	ABAT; 4-aminobutyrate aminotransferase / (S)-3-amino-2-methylpropionate transaminase [EC:2.6.1.19 2.6.1.22]
	sw03490	K01640	E4.1.3.4, HMGCL, hmgL; hydroxymethylglutaryl-CoA lyase [EC:4.1.3.4]
	sw18740	K01027	OXCT; 3-oxoacid CoA-transferase [EC:2.8.3.5]
	Inositol phosphate metabolism
	sw09759	K00888	PI4K; phosphatidylinositol 4-kinase [EC:2.7.1.67]
	sw17981	K05858	PLCB; phosphatidylinositol phospholipase C, beta [EC:3.1.4.11]
	sw03217	K00469	MIOX; inositol oxygenase [EC:1.13.99.1]
Energy metabolism
	Oxidative phosphorylation
	sw08124	K00237	SDHD, SDH4; succinate dehydrogenase (ubiquinone) membrane anchor subunit
	sw05999	K00234	SDHA, SDH1; succinate dehydrogenase (ubiquinone) flavoprotein subunit [EC:1.3.5.1]
	sw12174	K02123	ATPVI, ntpI; V-type H+-transporting ATPase subunit I [EC:3.6.3.14]
	sw09888	K02146	ATPeVAC39, ATP6D; V-type H+-transporting ATPase subunit AC39 [EC:3.6.3.14]
	sw14354	K02148	ATPeVC, ATP6C; V-type H+-transporting ATPase subunit C [EC:3.6.3.14]
	sw22916	K02145	ATPeVA, ATP6A1; V-type H+-transporting ATPase subunit A [EC:3.6.3.14]
	sw00795	K02147	ATPeVB, ATP6B1; V-type H+-transporting ATPase subunit B [EC:3.6.3.14]
	sw14793	K02150	ATPeVE, ATP6E; V-type H+-transporting ATPase subunit E [EC:3.6.3.14]
	sw07674	K02155	ATPeVPL, ATP6L; V-type H+-transporting ATPase 16kDa proteolipid subunit [EC:3.6.3.14]
	sw14397	K03661	ATPeVPF, ATP6F; V-type H+-transporting ATPase 21kDa proteolipid subunit [EC:3.6.3.14]
	sw04026	K02154	ATPeVI, ATP6N1A; V-type H+-transporting ATPase subunit I [EC:3.6.3.14]
	sw09128	K02154	ATPeVI, ATP6N1A; V-type H+-transporting ATPase subunit I [EC:3.6.3.14]
	sw09511	K02154	ATPeVI, ATP6N1A; V-type H+-transporting ATPase subunit I [EC:3.6.3.14]
	sw13277	K02152	ATPeVG, ATP6G1; V-type H+-transporting ATPase subunit G [EC:3.6.3.14]
	sw21938	K02144	ATPeV54kD; V-type H+-transporting ATPase 54 kD subunit [EC:3.6.3.14]
	Carbon fixation in photosynthetic organisms
	sw06691	K01623	ALDO; fructose-bisphosphate aldolase, class I [EC:4.1.2.13]
	sw04448	K03841	FBP, fbp; fructose-1,6-bisphosphatase I [EC:3.1.3.11]
	sw00306	K00615	E2.2.1.1, tktA, tktB; transketolase [EC:2.2.1.1]
	sw22892	K00873	PK, pyk; pyruvate kinase [EC:2.7.1.40]
	sw01916	K00029	E1.1.1.40, maeB; malate dehydrogenase (oxaloacetate-decarboxylating)(NADP+) [EC:1.1.1.40]
	sw10674	K14455	GOT2; aspartate aminotransferase, mitochondrial [EC:2.6.1.1]
	sw14438	K14455	GOT2; aspartate aminotransferase, mitochondrial [EC:2.6.1.1]
	sw06088	K00025	MDH1; malate dehydrogenase [EC:1.1.1.37]
	sw14808	K00026	MDH2; malate dehydrogenase [EC:1.1.1.37]
	Carbon fixation pathways in prokaryotes
	sw08612	K01007	pps, ppsA; pyruvate, water dikinase [EC:2.7.9.2]
	sw01281	K01958	PC, pyc; pyruvate carboxylase [EC:6.4.1.1]
	sw21913	K00626	E2.3.1.9, atoB; acetyl-CoA C-acetyltransferase [EC:2.3.1.9]
	sw22915	K00626	E2.3.1.9, atoB; acetyl-CoA C-acetyltransferase [EC:2.3.1.9]
	sw06329	K00031	IDH1, IDH2, icd; isocitrate dehydrogenase [EC:1.1.1.42]
	sw10937	K01681	ACO, acnA; aconitate hydratase 1 / homoaconitase [EC:4.2.1.3 4.2.1.-]
	sw20350	K01681	ACO, acnA; aconitate hydratase 1 / homoaconitase [EC:4.2.1.3 4.2.1.-]
	Methane metabolism
	sw03328	K00600	glyA, SHMT; glycine hydroxymethyltransferase [EC:2.1.2.1]
	sw11858	K00600	glyA, SHMT; glycine hydroxymethyltransferase [EC:2.1.2.1]
	sw01800	K00830	AGXT; alanine-glyoxylate transaminase / serine-glyoxylate transaminase / serine-pyruvate transaminase [EC:2.6.1.44 2.6.1.45 2.6.1.51]
	sw19274	K01689	ENO, eno; enolase [EC:4.2.1.11]
	sw05928	K00863	E2.7.1.29, DAK1, DAK2; dihydroxyacetone kinase [EC:2.7.1.29]
	sw06691	K01623	ALDO; fructose-bisphosphate aldolase, class I [EC:4.1.2.13]
	sw04448	K03841	FBP, fbp; fructose-1,6-bisphosphatase I [EC:3.1.3.11]
	sw08708	K00485	E1.14.13.8; dimethylaniline monooxygenase (N-oxide forming) [EC:1.14.13.8]
	sw08612	K01007	pps, ppsA; pyruvate, water dikinase [EC:2.7.9.2]
	sw00210	K00058	serA, PHGDH; D-3-phosphoglycerate dehydrogenase [EC:1.1.1.95]
	sw07324	K00831	serC, PSAT1; phosphoserine aminotransferase [EC:2.6.1.52]
	sw13964	K01079	serB, PSPH; phosphoserine phosphatase [EC:3.1.3.3]
	sw12174	K02123	ATPVI, ntpI; V-type H+-transporting ATPase subunit I [EC:3.6.3.14]
	Nitrogen metabolism
	sw03787	K01672	E4.2.1.1; carbonic anhydrase [EC:4.2.1.1]
	sw08471	K00605	gcvT, AMT; aminomethyltransferase [EC:2.1.2.10]
	sw12457	K00261	GLUD1_2, gdhA; glutamate dehydrogenase (NAD(P)+) [EC:1.4.1.3]
	sw03153	K01915	glnA; glutamine synthetase [EC:6.3.1.2]
	sw07091	K01915	glnA; glutamine synthetase [EC:6.3.1.2]
	sw21168	K01915	glnA; glutamine synthetase [EC:6.3.1.2]
	sw11016	K01953	asnB, ASNS; asparagine synthase (glutamine-hydrolysing) [EC:6.3.5.4]
Lipid metabolism
	Fatty acid biosynthesis
	sw20168	K00665	FASN; fatty acid synthase, animal type [EC:2.3.1.85]
	sw12555	K00665	FASN; fatty acid synthase, animal type [EC:2.3.1.85]
	sw19113	K00059	fabG; 3-oxoacyl-[acyl-carrier protein] reductase [EC:1.1.1.100]
	Fatty acid elongation
	sw19273	K07508	ACAA2; acetyl-CoA acyltransferase 2 [EC:2.3.1.16]
	sw07055	K07509	HADHB; acetyl-CoA acyltransferase [EC:2.3.1.16]
	sw13503	K07509	HADHB; acetyl-CoA acyltransferase [EC:2.3.1.16]
	sw19440	K07511	ECHS1; enoyl-CoA hydratase [EC:4.2.1.17]
	sw03915	K01074	PPT; palmitoyl-protein thioesterase [EC:3.1.2.22]
	sw14293	K10250	ELOVL7; elongation of very long chain fatty acids protein 7 [EC:2.3.1.199]
	sw00305	K10251	HSD17B12, KAR, IFA38; 17beta-estradiol 17-dehydrogenase / very-long-chain 3-oxoacyl-CoA reductase [EC:1.1.1.62 1.1.1.330]
	Fatty acid metabolism
	sw21913	K00626	E2.3.1.9, atoB; acetyl-CoA C-acetyltransferase [EC:2.3.1.9]
	sw22915	K00626	E2.3.1.9, atoB; acetyl-CoA C-acetyltransferase [EC:2.3.1.9]
	sw19273	K07508	ACAA2; acetyl-CoA acyltransferase 2 [EC:2.3.1.16]
	sw07055	K07509	HADHB; acetyl-CoA acyltransferase [EC:2.3.1.16]
	sw13503	K07509	HADHB; acetyl-CoA acyltransferase [EC:2.3.1.16]
	sw19440	K07511	ECHS1; enoyl-CoA hydratase [EC:4.2.1.17]
	sw14804	K00232	E1.3.3.6, ACOX1, ACOX3; acyl-CoA oxidase [EC:1.3.3.6]
	sw09449	K09478	ACADSB; short/branched chain acyl-CoA dehydrogenase [EC:1.3.99.12]
	sw16601	K09478	ACADSB; short/branched chain acyl-CoA dehydrogenase [EC:1.3.99.12]
	sw15130	K09479	ACADVL; very long chain acyl-CoA dehydrogenase [EC:1.3.8.9]
	sw08616	K00252	GCDH, gcdH; glutaryl-CoA dehydrogenase [EC:1.3.8.6]
	sw14881	K01897	ACSL, fadD; long-chain acyl-CoA synthetase [EC:6.2.1.3]
	sw09712	K00128	E1.2.1.3; aldehyde dehydrogenase (NAD+) [EC:1.2.1.3]
	sw00132	K14085	ALDH7A1; aldehyde dehydrogenase family 7 member A1 [EC:1.2.1.31 1.2.1.8 1.2.1.3]
	sw02887	K14338	cypD_E, CYP102A2_3; cytochrome P450 / NADPH-cytochrome P450 reductase [EC:1.14.14.1 1.6.2.4]
	Synthesis and degradation of ketone bodies
	sw03490	K01640	E4.1.3.4, HMGCL, hmgL; hydroxymethylglutaryl-CoA lyase [EC:4.1.3.4]
	sw18740	K01027	OXCT; 3-oxoacid CoA-transferase [EC:2.8.3.5]
	sw21913	K00626	E2.3.1.9, atoB; acetyl-CoA C-acetyltransferase [EC:2.3.1.9]
	sw22915	K00626	E2.3.1.9, atoB; acetyl-CoA C-acetyltransferase [EC:2.3.1.9]
	Cutin, suberine and wax biosynthesis
	sw09099	K13356	FAR; fatty acyl-CoA reductase [EC:1.2.1.-]
	Steroid biosynthesis
	sw11832	K05917	CYP51; cytochrome P450, family 51 (sterol 14-demethylase) [EC:1.14.13.70]
	sw04343	K09828	DHCR24; delta24-sterol reductase [EC:1.3.1.72]
	sw13499	K12298	CEL; bile salt-stimulated lipase [EC:3.1.1.3 3.1.1.13]
	Steroid hormone biosynthesis
	sw00305	K10251	HSD17B12, KAR, IFA38; 17beta-estradiol 17-dehydrogenase / very-long-chain 3-oxoacyl-CoA reductase [EC:1.1.1.62 1.1.1.330]
	sw22710	K00699	UGT; glucuronosyltransferase [EC:2.4.1.17]
	sw19163	K00699	UGT; glucuronosyltransferase [EC:2.4.1.17]
	sw18729	K00699	UGT; glucuronosyltransferase [EC:2.4.1.17]
	sw06973	K00699	UGT; glucuronosyltransferase [EC:2.4.1.17]
	Glycerolipid metabolism
	sw09712	K00128	E1.2.1.3; aldehyde dehydrogenase (NAD+) [EC:1.2.1.3]
	sw00132	K14085	ALDH7A1; aldehyde dehydrogenase family 7 member A1 [EC:1.2.1.31 1.2.1.8 1.2.1.3]
	sw07418	K00011	E1.1.1.21, AKR1; aldehyde reductase [EC:1.1.1.21]
	sw10579	K00011	E1.1.1.21, AKR1; aldehyde reductase [EC:1.1.1.21]
	sw17644	K00011	E1.1.1.21, AKR1; aldehyde reductase [EC:1.1.1.21]
	sw10994	K00002	AKR1A1, adh; alcohol dehydrogenase (NADP+) [EC:1.1.1.2]
	sw05928	K00863	E2.7.1.29, DAK1, DAK2; dihydroxyacetone kinase [EC:2.7.1.29]
	sw03391	K01080	PPAP2; phosphatidate phosphatase [EC:3.1.3.4]
	sw17708	K00901	E2.7.1.107, DGK, dgkA; diacylglycerol kinase (ATP dependent) [EC:2.7.1.107]
	sw18197	K01046	E3.1.1.3; triacylglycerol lipase [EC:3.1.1.3]
	sw13499	K12298	CEL; bile salt-stimulated lipase [EC:3.1.1.3 3.1.1.13]
	sw07028	K01189	GLA; alpha-galactosidase [EC:3.2.1.22]
	sw09747	K01189	GLA; alpha-galactosidase [EC:3.2.1.22]
	Glycerophospholipid metabolism
	sw15541	K00111	glpA, glpD; glycerol-3-phosphate dehydrogenase [EC:1.1.5.3]
	sw03391	K01080	PPAP2; phosphatidate phosphatase [EC:3.1.3.4]
	sw17708	K00901	E2.7.1.107, DGK, dgkA; diacylglycerol kinase (ATP dependent) [EC:2.7.1.107]
	sw00954	K01047	PLA2G, SPLA2; secretory phospholipase A2 [EC:3.1.1.4]
	sw16854	K01126	E3.1.4.46, glpQ, ugpQ; glycerophosphoryl diester phosphodiesterase [EC:3.1.4.46]
	sw21299	K00993	EPT1; ethanolaminephosphotransferase [EC:2.7.8.1]
	Ether lipid metabolism
	sw03391	K01080	PPAP2; phosphatidate phosphatase [EC:3.1.3.4]
	sw21299	K00993	EPT1; ethanolaminephosphotransferase [EC:2.7.8.1]
	sw00954	K01047	PLA2G, SPLA2; secretory phospholipase A2 [EC:3.1.1.4]
	Sphingolipid metabolism
	sw06076	K12350	SMPD1, ASM; sphingomyelin phosphodiesterase [EC:3.1.4.12]
	sw11624	K12350	SMPD1, ASM; sphingomyelin phosphodiesterase [EC:3.1.4.12]
	sw03391	K01080	PPAP2; phosphatidate phosphatase [EC:3.1.3.4]
	sw15372	K01201	GBA, srfJ; glucosylceramidase [EC:3.2.1.45]
	sw07423	K17108	GBA2; non-lysosomal glucosylceramidase [EC:3.2.1.45]
	sw05025	K12309	GLB1, ELNR1; beta-galactosidase [EC:3.2.1.23]
	sw07028	K01189	GLA; alpha-galactosidase [EC:3.2.1.22]
	sw09747	K01189	GLA; alpha-galactosidase [EC:3.2.1.22]
	Arachidonic acid metabolism
	sw00954	K01047	PLA2G, SPLA2; secretory phospholipase A2 [EC:3.1.1.4]
	sw02154	K00681	ggt; gamma-glutamyltranspeptidase [EC:2.3.2.2]
	Linoleic acid metabolism
	sw00954	K01047	PLA2G, SPLA2; secretory phospholipase A2 [EC:3.1.1.4]
	sw19662	K00100	E1.1.1.-; [EC:1.1.1.-]
	sw22929	K00100	E1.1.1.-; [EC:1.1.1.-]
	alpha-Linolenic acid metabolism
	sw00954	K01047	PLA2G, SPLA2; secretory phospholipase A2 [EC:3.1.1.4]
	sw14804	K00232	E1.3.3.6, ACOX1, ACOX3; acyl-CoA oxidase [EC:1.3.3.6]
	Biosynthesis of unsaturated fatty acids
	sw00305	K10251	HSD17B12, KAR, IFA38; 17beta-estradiol 17-dehydrogenase / very-long-chain 3-oxoacyl-CoA reductase [EC:1.1.1.62 1.1.1.330]
	sw19113	K00059	fabG; 3-oxoacyl-[acyl-carrier protein] reductase [EC:1.1.1.100]
	sw18173	K00507	SCD, desC; stearoyl-CoA desaturase (delta-9 desaturase) [EC:1.14.19.1]
	sw22744	K00507	SCD, desC; stearoyl-CoA desaturase (delta-9 desaturase) [EC:1.14.19.1]
	sw20866	K00507	SCD, desC; stearoyl-CoA desaturase (delta-9 desaturase) [EC:1.14.19.1]
	sw11269	K00507	SCD, desC; stearoyl-CoA desaturase (delta-9 desaturase) [EC:1.14.19.1]
	sw13636	K00507	SCD, desC; stearoyl-CoA desaturase (delta-9 desaturase) [EC:1.14.19.1]
	sw14804	K00232	E1.3.3.6, ACOX1, ACOX3; acyl-CoA oxidase [EC:1.3.3.6]
Nucleotide metabolism
	Purine metabolism
	sw17679	K01835	pgm; phosphoglucomutase [EC:5.4.2.2]
	sw17859	K01835	pgm; phosphoglucomutase [EC:5.4.2.2]
	sw04154	K00948	PRPS, prsA; ribose-phosphate pyrophosphokinase [EC:2.7.6.1]
	sw00365	K01952	purL, PFAS; phosphoribosylformylglycinamidine synthase [EC:6.3.5.3]
	sw10102	K01587	PAICS; phosphoribosylaminoimidazole carboxylase / phosphoribosylaminoimidazole-succinocarboxamide synthase [EC:4.1.1.21 6.3.2.6]
	sw17399	K01587	PAICS; phosphoribosylaminoimidazole carboxylase / phosphoribosylaminoimidazole-succinocarboxamide synthase [EC:4.1.1.21 6.3.2.6]
	sw06862	K01756	purB, ADSL; adenylosuccinate lyase [EC:4.3.2.2]
	sw18903	K00602	purH; phosphoribosylaminoimidazolecarboxamide formyltransferase / IMP cyclohydrolase [EC:2.1.2.3 3.5.4.10]
	sw00791	K01081	E3.1.3.5; 5'-nucleotidase [EC:3.1.3.5]
	sw21035	K01081	E3.1.3.5; 5'-nucleotidase [EC:3.1.3.5]
	sw21271	K01081	E3.1.3.5; 5'-nucleotidase [EC:3.1.3.5]
	sw09405	K03783	punA; purine-nucleoside phosphorylase [EC:2.4.2.1]
	sw08784	K00106	XDH; xanthine dehydrogenase/oxidase [EC:1.17.1.4 1.17.3.2]
	sw22892	K00873	PK, pyk; pyruvate kinase [EC:2.7.1.40]
	sw07356	K10807	RRM1; ribonucleoside-diphosphate reductase subunit M1 [EC:1.17.4.1]
	sw04795	K10808	RRM2; ribonucleoside-diphosphate reductase subunit M2 [EC:1.17.4.1]
	sw11493	K13755	PDE1; calcium/calmodulin-dependent 3',5'-cyclic nucleotide phosphodiesterase [EC:3.1.4.17]
	sw01149	K00939	E2.7.4.3, adk; adenylate kinase [EC:2.7.4.3]
	sw02311	K00962	pnp, PNPT1; polyribonucleotide nucleotidyltransferase [EC:2.7.7.8]
	sw08108	K00365	E1.7.3.3; urate oxidase [EC:1.7.3.3]
	sw01725	K01466	allB; allantoinase [EC:3.5.2.5]
	Pyrimidine metabolism
	sw02311	K00962	pnp, PNPT1; polyribonucleotide nucleotidyltransferase [EC:2.7.7.8]
	sw00791	K01081	E3.1.3.5; 5'-nucleotidase [EC:3.1.3.5]
	sw21035	K01081	E3.1.3.5; 5'-nucleotidase [EC:3.1.3.5]
	sw21271	K01081	E3.1.3.5; 5'-nucleotidase [EC:3.1.3.5]
	sw20520	K00207	E1.3.1.2, DPYD; dihydropyrimidine dehydrogenase (NADP+) [EC:1.3.1.2]
	sw02334	K00207	E1.3.1.2, DPYD; dihydropyrimidine dehydrogenase (NADP+) [EC:1.3.1.2]
	sw18478	K00207	E1.3.1.2, DPYD; dihydropyrimidine dehydrogenase (NADP+) [EC:1.3.1.2]
	sw18510	K00207	E1.3.1.2, DPYD; dihydropyrimidine dehydrogenase (NADP+) [EC:1.3.1.2]
	sw14040	K01431	E3.5.1.6; beta-ureidopropionase [EC:3.5.1.6]
	sw07356	K10807	RRM1; ribonucleoside-diphosphate reductase subunit M1 [EC:1.17.4.1]
	sw04795	K10808	RRM2; ribonucleoside-diphosphate reductase subunit M2 [EC:1.17.4.1]
	sw09405	K03783	punA; purine-nucleoside phosphorylase [EC:2.4.2.1]
Amino acid metabolism
	Alanine, aspartate and glutamate metabolism
	sw10674	K14455	GOT2; aspartate aminotransferase, mitochondrial [EC:2.6.1.1]
	sw14438	K14455	GOT2; aspartate aminotransferase, mitochondrial [EC:2.6.1.1]
	sw11016	K01953	asnB, ASNS; asparagine synthase (glutamine-hydrolysing) [EC:6.3.5.4]
	sw01800	K00830	AGXT; alanine-glyoxylate transaminase / serine-glyoxylate transaminase / serine-pyruvate transaminase [EC:2.6.1.44 2.6.1.45 2.6.1.51]
	sw17865	K00827	AGXT2; alanine-glyoxylate transaminase / (R)-3-amino-2-methylpropionate-pyruvate transaminase [EC:2.6.1.44 2.6.1.40]
	sw15184	K01755	argH, ASL; argininosuccinate lyase [EC:4.3.2.1]
	sw06862	K01756	purB, ADSL; adenylosuccinate lyase [EC:4.3.2.2]
	sw03110	K13524	ABAT; 4-aminobutyrate aminotransferase / (S)-3-amino-2-methylpropionate transaminase [EC:2.6.1.19 2.6.1.22]
	sw12457	K00261	GLUD1_2, gdhA; glutamate dehydrogenase (NAD(P)+) [EC:1.4.1.3]
	sw12606	K00294	E1.5.1.12; 1-pyrroline-5-carboxylate dehydrogenase [EC:1.5.1.12]
	sw03153	K01915	glnA; glutamine synthetase [EC:6.3.1.2]
	sw07091	K01915	glnA; glutamine synthetase [EC:6.3.1.2]
	sw21168	K01915	glnA; glutamine synthetase [EC:6.3.1.2]
	Glycine, serine and threonine metabolism
	sw12183	K01620	ltaE; threonine aldolase [EC:4.1.2.5]
	sw03328	K00600	glyA, SHMT; glycine hydroxymethyltransferase [EC:2.1.2.1]
	sw11858	K00600	glyA, SHMT; glycine hydroxymethyltransferase [EC:2.1.2.1]
	sw13964	K01079	serB, PSPH; phosphoserine phosphatase [EC:3.1.3.3]
	sw07324	K00831	serC, PSAT1; phosphoserine aminotransferase [EC:2.6.1.52]
	sw00210	K00058	serA, PHGDH; D-3-phosphoglycerate dehydrogenase [EC:1.1.1.95]
	sw12651	K15789	TDH; threonine 3-dehydrogenase [EC:1.1.1.103]
	sw13897	K00643	E2.3.1.37, ALAS; 5-aminolevulinate synthase [EC:2.3.1.37]
	sw14309	K00281	GLDC, gcvP; glycine dehydrogenase [EC:1.4.4.2]
	sw19567	K00281	GLDC, gcvP; glycine dehydrogenase [EC:1.4.4.2]
	sw08471	K00605	gcvT, AMT; aminomethyltransferase [EC:2.1.2.10]
	sw01800	K00830	AGXT; alanine-glyoxylate transaminase / serine-glyoxylate transaminase / serine-pyruvate transaminase [EC:2.6.1.44 2.6.1.45 2.6.1.51]
	sw17865	K00827	AGXT2; alanine-glyoxylate transaminase / (R)-3-amino-2-methylpropionate-pyruvate transaminase [EC:2.6.1.44 2.6.1.40]
	sw09154	K00108	E1.1.99.1, betA, CHDH; choline dehydrogenase [EC:1.1.99.1]
	sw19386	K00108	E1.1.99.1, betA, CHDH; choline dehydrogenase [EC:1.1.99.1]
	sw18269	K00108	E1.1.99.1, betA, CHDH; choline dehydrogenase [EC:1.1.99.1]
	sw05528	K00108	E1.1.99.1, betA, CHDH; choline dehydrogenase [EC:1.1.99.1]
	sw00132	K14085	ALDH7A1; aldehyde dehydrogenase family 7 member A1 [EC:1.2.1.31 1.2.1.8 1.2.1.3]
	sw12244	K00314	SARDH; sarcosine dehydrogenase [EC:1.5.8.3]
	sw00993	K00552	GNMT; glycine N-methyltransferase [EC:2.1.1.20]
	sw06200	K00552	GNMT; glycine N-methyltransferase [EC:2.1.1.20]
	sw11342	K01697	E4.2.1.22, CBS; cystathionine beta-synthase [EC:4.2.1.22]
	sw00748	K01754	E4.3.1.19, ilvA, tdcB; threonine dehydratase [EC:4.3.1.19]
	Cysteine and methionine metabolism
	sw11342	K01697	E4.2.1.22, CBS; cystathionine beta-synthase [EC:4.2.1.22]
	sw18965	K00797	speE, SRM; spermidine synthase [EC:2.5.1.16]
	sw18367	K00802	SMS; spermine synthase [EC:2.5.1.22]
	sw14229	K00772	E2.4.2.28, mtaP; 5'-methylthioadenosine phosphorylase [EC:2.4.2.28]
	sw06580	K08967	mtnD, mtnZ, ADI1; 1,2-dihydroxy-3-keto-5-methylthiopentene dioxygenase [EC:1.13.11.53 1.13.11.54]
	sw07563	K08967	mtnD, mtnZ, ADI1; 1,2-dihydroxy-3-keto-5-methylthiopentene dioxygenase [EC:1.13.11.53 1.13.11.54]
	sw10674	K14455	GOT2; aspartate aminotransferase, mitochondrial [EC:2.6.1.1]
	sw14438	K14455	GOT2; aspartate aminotransferase, mitochondrial [EC:2.6.1.1]
	Valine, leucine and isoleucine degradation
	sw21921	K00166	E1.2.4.4A, bkdA1; 2-oxoisovalerate dehydrogenase E1 component, alpha subunit [EC:1.2.4.4]
	sw22938	K00166	E1.2.4.4A, bkdA1; 2-oxoisovalerate dehydrogenase E1 component, alpha subunit [EC:1.2.4.4]
	sw18525	K00167	E1.2.4.4B, bkdA2; 2-oxoisovalerate dehydrogenase E1 component, beta subunit [EC:1.2.4.4]
	sw06670	K09699	E2.3.1.168, bkdB; 2-oxoisovalerate dehydrogenase E2 component (dihydrolipoyl transacylase) [EC:2.3.1.168]
	sw07108	K09699	E2.3.1.168, bkdB; 2-oxoisovalerate dehydrogenase E2 component (dihydrolipoyl transacylase) [EC:2.3.1.168]
	sw08292	K09699	E2.3.1.168, bkdB; 2-oxoisovalerate dehydrogenase E2 component (dihydrolipoyl transacylase) [EC:2.3.1.168]
	sw18275	K00253	IVD, ivd; isovaleryl-CoA dehydrogenase [EC:1.3.8.4]
	sw09449	K09478	ACADSB; short/branched chain acyl-CoA dehydrogenase [EC:1.3.99.12]
	sw16601	K09478	ACADSB; short/branched chain acyl-CoA dehydrogenase [EC:1.3.99.12]
	sw19440	K07511	ECHS1; enoyl-CoA hydratase [EC:4.2.1.17]
	sw19273	K07508	ACAA2; acetyl-CoA acyltransferase 2 [EC:2.3.1.16]
	sw07055	K07509	HADHB; acetyl-CoA acyltransferase [EC:2.3.1.16]
	sw13503	K07509	HADHB; acetyl-CoA acyltransferase [EC:2.3.1.16]
	sw09712	K00128	E1.2.1.3; aldehyde dehydrogenase (NAD+) [EC:1.2.1.3]
	sw00132	K14085	ALDH7A1; aldehyde dehydrogenase family 7 member A1 [EC:1.2.1.31 1.2.1.8 1.2.1.3]
	sw03110	K13524	ABAT; 4-aminobutyrate aminotransferase / (S)-3-amino-2-methylpropionate transaminase [EC:2.6.1.19 2.6.1.22]
	sw01389	K01968	E6.4.1.4A; 3-methylcrotonyl-CoA carboxylase alpha subunit [EC:6.4.1.4]
	sw20370	K01968	E6.4.1.4A; 3-methylcrotonyl-CoA carboxylase alpha subunit [EC:6.4.1.4]
	sw13805	K05607	AUH; methylglutaconyl-CoA hydratase [EC:4.2.1.18]
	sw03490	K01640	E4.1.3.4, HMGCL, hmgL; hydroxymethylglutaryl-CoA lyase [EC:4.1.3.4]
	sw18740	K01027	OXCT; 3-oxoacid CoA-transferase [EC:2.8.3.5]
	sw21913	K00626	E2.3.1.9, atoB; acetyl-CoA C-acetyltransferase [EC:2.3.1.9]
	sw22915	K00626	E2.3.1.9, atoB; acetyl-CoA C-acetyltransferase [EC:2.3.1.9]
	Valine, leucine and isoleucine biosynthesis
	sw00748	K01754	E4.3.1.19, ilvA, tdcB; threonine dehydratase [EC:4.3.1.19]
	Lysine biosynthesis
	sw10937	K01681	ACO, acnA; aconitate hydratase 1 / homoaconitase [EC:4.2.1.3 4.2.1.-]
	sw20350	K01681	ACO, acnA; aconitate hydratase 1 / homoaconitase [EC:4.2.1.3 4.2.1.-]
	sw00132	K14085	ALDH7A1; aldehyde dehydrogenase family 7 member A1 [EC:1.2.1.31 1.2.1.8 1.2.1.3]
	Lysine degradation
	sw04515	K14157	AASS; alpha-aminoadipic semialdehyde synthase [EC:1.5.1.8 1.5.1.9]
	sw16993	K14157	AASS; alpha-aminoadipic semialdehyde synthase [EC:1.5.1.8 1.5.1.9]
	sw20163	K14157	AASS; alpha-aminoadipic semialdehyde synthase [EC:1.5.1.8 1.5.1.9]
	sw00132	K14085	ALDH7A1; aldehyde dehydrogenase family 7 member A1 [EC:1.2.1.31 1.2.1.8 1.2.1.3]
	sw10755	K00164	OGDH, sucA; 2-oxoglutarate dehydrogenase E1 component [EC:1.2.4.2]
	sw08616	K00252	GCDH, gcdH; glutaryl-CoA dehydrogenase [EC:1.3.8.6]
	sw19440	K07511	ECHS1; enoyl-CoA hydratase [EC:4.2.1.17]
	sw21913	K00626	E2.3.1.9, atoB; acetyl-CoA C-acetyltransferase [EC:2.3.1.9]
	sw22915	K00626	E2.3.1.9, atoB; acetyl-CoA C-acetyltransferase [EC:2.3.1.9]
	sw09712	K00128	E1.2.1.3; aldehyde dehydrogenase (NAD+) [EC:1.2.1.3]
	sw01504	K00471	E1.14.11.1; gamma-butyrobetaine dioxygenase [EC:1.14.11.1]
	sw14977	K00471	E1.14.11.1; gamma-butyrobetaine dioxygenase [EC:1.14.11.1]
	sw15682	K00473	PLOD1; procollagen-lysine,2-oxoglutarate 5-dioxygenase 1 [EC:1.14.11.4]
	sw06702	K13647	PLODN; procollagen-lysine,2-oxoglutarate 5-dioxygenase, invertebrate [EC:1.14.11.4]
	Arginine and proline metabolism
	sw18965	K00797	speE, SRM; spermidine synthase [EC:2.5.1.16]
	sw18367	K00802	SMS; spermine synthase [EC:2.5.1.22]
	sw09712	K00128	E1.2.1.3; aldehyde dehydrogenase (NAD+) [EC:1.2.1.3]
	sw00132	K14085	ALDH7A1; aldehyde dehydrogenase family 7 member A1 [EC:1.2.1.31 1.2.1.8 1.2.1.3]
	sw01402	K00934	E2.7.3.3; arginine kinase [EC:2.7.3.3]
	sw02528	K00819	E2.6.1.13, rocD; ornithine--oxo-acid transaminase [EC:2.6.1.13]
	sw12606	K00294	E1.5.1.12; 1-pyrroline-5-carboxylate dehydrogenase [EC:1.5.1.12]
	sw09946	K12657	ALDH18A1, P5CS; delta-1-pyrroline-5-carboxylate synthetase [EC:2.7.2.11 1.2.1.41]
	sw01949	K00472	E1.14.11.2; prolyl 4-hydroxylase [EC:1.14.11.2]
	sw14330	K00472	E1.14.11.2; prolyl 4-hydroxylase [EC:1.14.11.2]
	sw10674	K14455	GOT2; aspartate aminotransferase, mitochondrial [EC:2.6.1.1]
	sw14438	K14455	GOT2; aspartate aminotransferase, mitochondrial [EC:2.6.1.1]
	sw15184	K01755	argH, ASL; argininosuccinate lyase [EC:4.3.2.1]
	sw09544	K01476	E3.5.3.1, rocF, arg; arginase [EC:3.5.3.1]
	sw03153	K01915	glnA; glutamine synthetase [EC:6.3.1.2]
	sw07091	K01915	glnA; glutamine synthetase [EC:6.3.1.2]
	sw21168	K01915	glnA; glutamine synthetase [EC:6.3.1.2]
	sw12457	K00261	GLUD1_2, gdhA; glutamate dehydrogenase (NAD(P)+) [EC:1.4.1.3]
	sw22573	K14677	ACY1; aminoacylase [EC:3.5.1.14]
	Histidine metabolism
	sw09712	K00128	E1.2.1.3; aldehyde dehydrogenase (NAD+) [EC:1.2.1.3]
	sw00132	K14085	ALDH7A1; aldehyde dehydrogenase family 7 member A1 [EC:1.2.1.31 1.2.1.8 1.2.1.3]
	sw18911	K00129	E1.2.1.5; aldehyde dehydrogenase (NAD(P)+) [EC:1.2.1.5]
	Tyrosine metabolism
	sw10674	K14455	GOT2; aspartate aminotransferase, mitochondrial [EC:2.6.1.1]
	sw14438	K14455	GOT2; aspartate aminotransferase, mitochondrial [EC:2.6.1.1]
	sw07607	K00457	HPD, hppD; 4-hydroxyphenylpyruvate dioxygenase [EC:1.13.11.27]
	sw11963	K00451	HGD, hmgA; homogentisate 1,2-dioxygenase [EC:1.13.11.5]
	sw01333	K01555	FAH, fahA; fumarylacetoacetase [EC:3.7.1.2]
	sw13482	K00501	TH; tyrosine 3-monooxygenase [EC:1.14.16.2]
	sw18911	K00129	E1.2.1.5; aldehyde dehydrogenase (NAD(P)+) [EC:1.2.1.5]
	sw13174	K07253	MIF; phenylpyruvate tautomerase [EC:5.3.2.1]
	Phenylalanine metabolism
	sw01062	K00500	phhA, PAH; phenylalanine-4-hydroxylase [EC:1.14.16.1]
	sw18911	K00129	E1.2.1.5; aldehyde dehydrogenase (NAD(P)+) [EC:1.2.1.5]
	sw10674	K14455	GOT2; aspartate aminotransferase, mitochondrial [EC:2.6.1.1]
	sw14438	K14455	GOT2; aspartate aminotransferase, mitochondrial [EC:2.6.1.1]
	sw07607	K00457	HPD, hppD; 4-hydroxyphenylpyruvate dioxygenase [EC:1.13.11.27]
	sw13174	K07253	MIF; phenylpyruvate tautomerase [EC:5.3.2.1]
	Tryptophan metabolism
	sw00689	K00453	E1.13.11.11, TDO2; tryptophan 2,3-dioxygenase [EC:1.13.11.11]
	sw09629	K00486	KMO; kynurenine 3-monooxygenase [EC:1.14.13.9]
	sw10755	K00164	OGDH, sucA; 2-oxoglutarate dehydrogenase E1 component [EC:1.2.4.2]
	sw08616	K00252	GCDH, gcdH; glutaryl-CoA dehydrogenase [EC:1.3.8.6]
	sw19440	K07511	ECHS1; enoyl-CoA hydratase [EC:4.2.1.17]
	sw21913	K00626	E2.3.1.9, atoB; acetyl-CoA C-acetyltransferase [EC:2.3.1.9]
	sw22915	K00626	E2.3.1.9, atoB; acetyl-CoA C-acetyltransferase [EC:2.3.1.9]
	sw10126	K00816	CCBL; kynurenine---oxoglutarate transaminase / cysteine-S-conjugate beta-lyase / glutamine---phenylpyruvate transaminase [EC:2.6.1.7 4.4.1.13 2.6.1.64]
	sw12156	K00816	CCBL; kynurenine---oxoglutarate transaminase / cysteine-S-conjugate beta-lyase / glutamine---phenylpyruvate transaminase [EC:2.6.1.7 4.4.1.13 2.6.1.64]
	sw18242	K00816	CCBL; kynurenine---oxoglutarate transaminase / cysteine-S-conjugate beta-lyase / glutamine---phenylpyruvate transaminase [EC:2.6.1.7 4.4.1.13 2.6.1.64]
	sw22405	K00816	CCBL; kynurenine---oxoglutarate transaminase / cysteine-S-conjugate beta-lyase / glutamine---phenylpyruvate transaminase [EC:2.6.1.7 4.4.1.13 2.6.1.64]
	sw22810	K00816	CCBL; kynurenine---oxoglutarate transaminase / cysteine-S-conjugate beta-lyase / glutamine---phenylpyruvate transaminase [EC:2.6.1.7 4.4.1.13 2.6.1.64]
	sw09712	K00128	E1.2.1.3; aldehyde dehydrogenase (NAD+) [EC:1.2.1.3]
	sw00132	K14085	ALDH7A1; aldehyde dehydrogenase family 7 member A1 [EC:1.2.1.31 1.2.1.8 1.2.1.3]
	sw22291	K00669	AANAT; arylalkylamine N-acetyltransferase [EC:2.3.1.87]
	sw02887	K14338	cypD_E, CYP102A2_3; cytochrome P450 / NADPH-cytochrome P450 reductase [EC:1.14.14.1 1.6.2.4]
	sw03619	K03781	katE, CAT, catB, srpA; catalase [EC:1.11.1.6]
	Phenylalanine, tyrosine and tryptophan biosynthesis
	sw10674	K14455	GOT2; aspartate aminotransferase, mitochondrial [EC:2.6.1.1]
	sw14438	K14455	GOT2; aspartate aminotransferase, mitochondrial [EC:2.6.1.1]
	sw01062	K00500	phhA, PAH; phenylalanine-4-hydroxylase [EC:1.14.16.1]
Metabolism of other amino acids
	beta-Alanine metabolism
	sw03110	K13524	ABAT; 4-aminobutyrate aminotransferase / (S)-3-amino-2-methylpropionate transaminase [EC:2.6.1.19 2.6.1.22]
	sw18965	K00797	speE, SRM; spermidine synthase [EC:2.5.1.16]
	sw18367	K00802	SMS; spermine synthase [EC:2.5.1.22]
	sw09712	K00128	E1.2.1.3; aldehyde dehydrogenase (NAD+) [EC:1.2.1.3]
	sw00132	K14085	ALDH7A1; aldehyde dehydrogenase family 7 member A1 [EC:1.2.1.31 1.2.1.8 1.2.1.3]
	sw18911	K00129	E1.2.1.5; aldehyde dehydrogenase (NAD(P)+) [EC:1.2.1.5]
	sw20520	K00207	E1.3.1.2, DPYD; dihydropyrimidine dehydrogenase (NADP+) [EC:1.3.1.2]
	sw02334	K00207	E1.3.1.2, DPYD; dihydropyrimidine dehydrogenase (NADP+) [EC:1.3.1.2]
	sw18478	K00207	E1.3.1.2, DPYD; dihydropyrimidine dehydrogenase (NADP+) [EC:1.3.1.2]
	sw18510	K00207	E1.3.1.2, DPYD; dihydropyrimidine dehydrogenase (NADP+) [EC:1.3.1.2]
	sw14040	K01431	E3.5.1.6; beta-ureidopropionase [EC:3.5.1.6]
	sw19440	K07511	ECHS1; enoyl-CoA hydratase [EC:4.2.1.17]
	Taurine and hypotaurine metabolism
	sw02154	K00681	ggt; gamma-glutamyltranspeptidase [EC:2.3.2.2]
	Phosphonate and phosphinate metabolism
	sw20548	K00119	E1.1.99.-; [EC:1.1.99.-]
	sw21299	K00993	EPT1; ethanolaminephosphotransferase [EC:2.7.8.1]
	Selenocompound metabolism
	sw10126	K00816	CCBL; kynurenine---oxoglutarate transaminase / cysteine-S-conjugate beta-lyase / glutamine---phenylpyruvate transaminase [EC:2.6.1.7 4.4.1.13 2.6.1.64]
	sw12156	K00816	CCBL; kynurenine---oxoglutarate transaminase / cysteine-S-conjugate beta-lyase / glutamine---phenylpyruvate transaminase [EC:2.6.1.7 4.4.1.13 2.6.1.64]
	sw18242	K00816	CCBL; kynurenine---oxoglutarate transaminase / cysteine-S-conjugate beta-lyase / glutamine---phenylpyruvate transaminase [EC:2.6.1.7 4.4.1.13 2.6.1.64]
	sw22405	K00816	CCBL; kynurenine---oxoglutarate transaminase / cysteine-S-conjugate beta-lyase / glutamine---phenylpyruvate transaminase [EC:2.6.1.7 4.4.1.13 2.6.1.64]
	sw22810	K00816	CCBL; kynurenine---oxoglutarate transaminase / cysteine-S-conjugate beta-lyase / glutamine---phenylpyruvate transaminase [EC:2.6.1.7 4.4.1.13 2.6.1.64]
	Cyanoamino acid metabolism
	sw11637	K01188	E3.2.1.21; beta-glucosidase [EC:3.2.1.21]
	sw19262	K01188	E3.2.1.21; beta-glucosidase [EC:3.2.1.21]
	sw04028	K01188	E3.2.1.21; beta-glucosidase [EC:3.2.1.21]
	sw02154	K00681	ggt; gamma-glutamyltranspeptidase [EC:2.3.2.2]
	sw03328	K00600	glyA, SHMT; glycine hydroxymethyltransferase [EC:2.1.2.1]
	sw11858	K00600	glyA, SHMT; glycine hydroxymethyltransferase [EC:2.1.2.1]
	D-Glutamine and D-glutamate metabolism
	sw12457	K00261	GLUD1_2, gdhA; glutamate dehydrogenase (NAD(P)+) [EC:1.4.1.3]
	Glutathione metabolism
	sw02154	K00681	ggt; gamma-glutamyltranspeptidase [EC:2.3.2.2]
	sw01658	K11140	ANPEP; aminopeptidase N [EC:3.4.11.2]
	sw16520	K11140	ANPEP; aminopeptidase N [EC:3.4.11.2]
	sw02205	K00799	GST, gst; glutathione S-transferase [EC:2.5.1.18]
	sw15127	K00799	GST, gst; glutathione S-transferase [EC:2.5.1.18]
	sw13395	K00799	GST, gst; glutathione S-transferase [EC:2.5.1.18]
	sw15474	K00799	GST, gst; glutathione S-transferase [EC:2.5.1.18]
	sw13043	K00799	GST, gst; glutathione S-transferase [EC:2.5.1.18]
	sw06329	K00031	IDH1, IDH2, icd; isocitrate dehydrogenase [EC:1.1.1.42]
	sw01471	K00033	E1.1.1.44, PGD, gnd; 6-phosphogluconate dehydrogenase [EC:1.1.1.44]
	sw18965	K00797	speE, SRM; spermidine synthase [EC:2.5.1.16]
	sw18367	K00802	SMS; spermine synthase [EC:2.5.1.22]
	sw07356	K10807	RRM1; ribonucleoside-diphosphate reductase subunit M1 [EC:1.17.4.1]
	sw04795	K10808	RRM2; ribonucleoside-diphosphate reductase subunit M2 [EC:1.17.4.1]
Glycan biosynthesis and metabolism
	N-Glycan biosynthesis
	sw16055	K00902	E2.7.1.108; dolichol kinase [EC:2.7.1.108]
	sw13402	K00729	ALG5; dolichyl-phosphate beta-glucosyltransferase [EC:2.4.1.117]
	sw15711	K00721	DPM1; dolichol-phosphate mannosyltransferase [EC:2.4.1.83]
	sw06984	K03844	ALG11; alpha-1,2-mannosyltransferase [EC:2.4.1.131]
	sw14420	K07151	STT3; dolichyl-diphosphooligosaccharide--protein glycosyltransferase [EC:2.4.99.18]
	sw18030	K07151	STT3; dolichyl-diphosphooligosaccharide--protein glycosyltransferase [EC:2.4.99.18]
	sw07956	K12670	WBP1; oligosaccharyltransferase complex subunit beta
	sw07800	K05546	GANAB; alpha 1,3-glucosidase [EC:3.2.1.84]
	sw17492	K01230	MAN1; mannosyl-oligosaccharide alpha-1,2-mannosidase [EC:3.2.1.113]
	sw18931	K01230	MAN1; mannosyl-oligosaccharide alpha-1,2-mannosidase [EC:3.2.1.113]
	sw14222	K00736	MGAT2; alpha-1,6-mannosyl-glycoprotein beta-1,2-N-acetylglucosaminyltransferase [EC:2.4.1.143]
	Various types of N-glycan biosynthesis
	sw06984	K03844	ALG11; alpha-1,2-mannosyltransferase [EC:2.4.1.131]
	sw14420	K07151	STT3; dolichyl-diphosphooligosaccharide--protein glycosyltransferase [EC:2.4.99.18]
	sw18030	K07151	STT3; dolichyl-diphosphooligosaccharide--protein glycosyltransferase [EC:2.4.99.18]
	sw07956	K12670	WBP1; oligosaccharyltransferase complex subunit beta
	sw17492	K01230	MAN1; mannosyl-oligosaccharide alpha-1,2-mannosidase [EC:3.2.1.113]
	sw18931	K01230	MAN1; mannosyl-oligosaccharide alpha-1,2-mannosidase [EC:3.2.1.113]
	sw14222	K00736	MGAT2; alpha-1,6-mannosyl-glycoprotein beta-1,2-N-acetylglucosaminyltransferase [EC:2.4.1.143]
	Mucin type O-glycan biosynthesis
	sw14162	K00710	GALNT; polypeptide N-acetylgalactosaminyltransferase [EC:2.4.1.41]
	sw20932	K00710	GALNT; polypeptide N-acetylgalactosaminyltransferase [EC:2.4.1.41]
	Glycosaminoglycan biosynthesis - chondroitin sulfate / dermatan sulfate
	sw09741	K00733	B4GALT7; xylosylprotein 4-beta-galactosyltransferase [EC:2.4.1.133]
	sw00539	K00733	B4GALT7; xylosylprotein 4-beta-galactosyltransferase [EC:2.4.1.133]
	sw09741	K00733	B4GALT7; xylosylprotein 4-beta-galactosyltransferase [EC:2.4.1.133]
	Glycosaminoglycan biosynthesis - heparan sulfate / heparin
	sw09741	K00733	B4GALT7; xylosylprotein 4-beta-galactosyltransferase [EC:2.4.1.133]
	sw00539	K00733	B4GALT7; xylosylprotein 4-beta-galactosyltransferase [EC:2.4.1.133]
	sw17680	K02367	EXT2; glucuronyl/N-acetylglucosaminyl transferase EXT2 [EC:2.4.1.224 2.4.1.225]
	sw20340	K02514	HS6ST1; heparan sulfate 6-O-sulfotransferase HS6ST1 [EC:2.8.2.-]
	sw06835	K08104	HS3ST5; [heparan sulfate]-glucosamine 3-sulfotransferase 5 [EC:2.8.2.23]
	Glycosaminoglycan degradation
	sw14847	K01135	ARSB; arylsulfatase B [EC:3.1.6.12]
	sw11201	K01205	NAGLU; alpha-N-acetylglucosaminidase [EC:3.2.1.50]
	sw05025	K12309	GLB1, ELNR1; beta-galactosidase [EC:3.2.1.23]
	sw15812	K01137	GNS; N-acetylglucosamine-6-sulfatase [EC:3.1.6.14]
	sw18395	K01137	GNS; N-acetylglucosamine-6-sulfatase [EC:3.1.6.14]
	sw19182	K12373	HEXA_B; hexosaminidase [EC:3.2.1.52]
	sw18447	K12373	HEXA_B; hexosaminidase [EC:3.2.1.52]
	sw20215	K12373	HEXA_B; hexosaminidase [EC:3.2.1.52]
	sw22618	K12373	HEXA_B; hexosaminidase [EC:3.2.1.52]
	Glycosylphosphatidylinositol(GPI)-anchor biosynthesis
	sw05029	K05290	PIGK; phosphatidylinositol glycan, class K [EC:2.6.-.-]
	sw09862	K05292	PIGT; phosphatidylinositol glycan, class T
	Glycosphingolipid biosynthesis - globo series
	sw07028	K01189	GLA; alpha-galactosidase [EC:3.2.1.22]
	sw09747	K01189	GLA; alpha-galactosidase [EC:3.2.1.22]
	sw19182	K12373	HEXA_B; hexosaminidase [EC:3.2.1.52]
	sw18447	K12373	HEXA_B; hexosaminidase [EC:3.2.1.52]
	sw20215	K12373	HEXA_B; hexosaminidase [EC:3.2.1.52]
	sw22618	K12373	HEXA_B; hexosaminidase [EC:3.2.1.52]
	Glycosphingolipid biosynthesis - ganglio series
	sw05025	K12309	GLB1, ELNR1; beta-galactosidase [EC:3.2.1.23]
	sw19182	K12373	HEXA_B; hexosaminidase [EC:3.2.1.52]
	sw18447	K12373	HEXA_B; hexosaminidase [EC:3.2.1.52]
	sw20215	K12373	HEXA_B; hexosaminidase [EC:3.2.1.52]
	sw22618	K12373	HEXA_B; hexosaminidase [EC:3.2.1.52]
	Lipopolysaccharide biosynthesis
	sw09038	K03274	gmhD, rfaD; ADP-L-glycero-D-manno-heptose 6-epimerase [EC:5.1.3.20]
	Other glycan degradation
	sw05025	K12309	GLB1, ELNR1; beta-galactosidase [EC:3.2.1.23]
	sw19182	K12373	HEXA_B; hexosaminidase [EC:3.2.1.52]
	sw18447	K12373	HEXA_B; hexosaminidase [EC:3.2.1.52]
	sw20215	K12373	HEXA_B; hexosaminidase [EC:3.2.1.52]
	sw22618	K12373	HEXA_B; hexosaminidase [EC:3.2.1.52]
	sw11824	K01191	E3.2.1.24; alpha-mannosidase [EC:3.2.1.24]
	sw20948	K12311	MAN2B1, LAMAN; lysosomal alpha-mannosidase [EC:3.2.1.24]
	sw15134	K01206	FUCA; alpha-L-fucosidase [EC:3.2.1.51]
	sw15372	K01201	GBA, srfJ; glucosylceramidase [EC:3.2.1.45]
	sw07423	K17108	GBA2; non-lysosomal glucosylceramidase [EC:3.2.1.45]
Metabolism of cofactors and vitamins
	Riboflavin metabolism
	sw17945	K14410	ACP; acid phosphatase [EC:3.1.3.2]
	sw17947	K14410	ACP; acid phosphatase [EC:3.1.3.2]
	Vitamin B6 metabolism
	sw07324	K00831	serC, PSAT1; phosphoserine aminotransferase [EC:2.6.1.52]
	Nicotinate and nicotinamide metabolism
	sw09405	K03783	punA; purine-nucleoside phosphorylase [EC:2.4.2.1]
	sw00791	K01081	E3.1.3.5; 5'-nucleotidase [EC:3.1.3.5]
	sw21035	K01081	E3.1.3.5; 5'-nucleotidase [EC:3.1.3.5]
	sw21271	K01081	E3.1.3.5; 5'-nucleotidase [EC:3.1.3.5]
	sw08678	K00323	NNT; NAD(P) transhydrogenase [EC:1.6.1.2]
	Pantothenate and CoA biosynthesis
	sw14040	K01431	E3.5.1.6; beta-ureidopropionase [EC:3.5.1.6]
	sw20520	K00207	E1.3.1.2, DPYD; dihydropyrimidine dehydrogenase (NADP+) [EC:1.3.1.2]
	sw02334	K00207	E1.3.1.2, DPYD; dihydropyrimidine dehydrogenase (NADP+) [EC:1.3.1.2]
	sw18478	K00207	E1.3.1.2, DPYD; dihydropyrimidine dehydrogenase (NADP+) [EC:1.3.1.2]
	sw18510	K00207	E1.3.1.2, DPYD; dihydropyrimidine dehydrogenase (NADP+) [EC:1.3.1.2]
	Biotin metabolism
	sw19113	K00059	fabG; 3-oxoacyl-[acyl-carrier protein] reductase [EC:1.1.1.100]
	Lipoic acid metabolism
	sw12672	K10105	LIPT1; lipoyltransferase 1
	Folate biosynthesis
	sw06587	K01077	E3.1.3.1, phoA, phoB; alkaline phosphatase [EC:3.1.3.1]
	sw15536	K00287	folA; dihydrofolate reductase [EC:1.5.1.3]
	sw15089	K00357	QDPR; dihydropteridine reductase [EC:1.5.1.34]
	One carbon pool by folate
	sw15536	K00287	folA; dihydrofolate reductase [EC:1.5.1.3]
	sw05452	K00288	MTHFD; methylenetetrahydrofolate dehydrogenase (NADP+) / methenyltetrahydrofolate cyclohydrolase / formyltetrahydrofolate synthetase [EC:1.5.1.5 3.5.4.9 6.3.4.3]
	sw11215	K00288	MTHFD; methylenetetrahydrofolate dehydrogenase (NADP+) / methenyltetrahydrofolate cyclohydrolase / formyltetrahydrofolate synthetase [EC:1.5.1.5 3.5.4.9 6.3.4.3]
	sw03328	K00600	glyA, SHMT; glycine hydroxymethyltransferase [EC:2.1.2.1]
	sw11858	K00600	glyA, SHMT; glycine hydroxymethyltransferase [EC:2.1.2.1]
	sw18903	K00602	purH; phosphoribosylaminoimidazolecarboxamide formyltransferase / IMP cyclohydrolase [EC:2.1.2.3 3.5.4.10]
	sw08471	K00605	gcvT, AMT; aminomethyltransferase [EC:2.1.2.10]
	sw03770	K01934	E6.3.3.2; 5-formyltetrahydrofolate cyclo-ligase [EC:6.3.3.2]
	Retinol metabolism
	sw05879	K11153	RDH12; retinol dehydrogenase 12 [EC:1.1.1.-]
	sw22710	K00699	UGT; glucuronosyltransferase [EC:2.4.1.17]
	sw19163	K00699	UGT; glucuronosyltransferase [EC:2.4.1.17]
	sw18729	K00699	UGT; glucuronosyltransferase [EC:2.4.1.17]
	sw06973	K00699	UGT; glucuronosyltransferase [EC:2.4.1.17]
	Porphyrin and chlorophyll metabolism
	sw13897	K00643	E2.3.1.37, ALAS; 5-aminolevulinate synthase [EC:2.3.1.37]
	sw17724	K01698	hemB, ALAD; porphobilinogen synthase [EC:4.2.1.24]
	sw03204	K01599	hemE, UROD; uroporphyrinogen decarboxylase [EC:4.1.1.37]
	sw22710	K00699	UGT; glucuronosyltransferase [EC:2.4.1.17]
	sw19163	K00699	UGT; glucuronosyltransferase [EC:2.4.1.17]
	sw18729	K00699	UGT; glucuronosyltransferase [EC:2.4.1.17]
	sw06973	K00699	UGT; glucuronosyltransferase [EC:2.4.1.17]
	sw16412	K01764	E4.4.1.17; cytochrome c heme-lyase [EC:4.4.1.17]
	Ubiquinone and other terpenoid-quinone biosynthesis
	sw04396	K01911	menE; O-succinylbenzoic acid--CoA ligase [EC:6.2.1.26]
	sw07607	K00457	HPD, hppD; 4-hydroxyphenylpyruvate dioxygenase [EC:1.13.11.27]
Metabolism of terpenoids and polyketides
	Terpenoid backbone biosynthesis
	sw21913	K00626	E2.3.1.9, atoB; acetyl-CoA C-acetyltransferase [EC:2.3.1.9]
	sw22915	K00626	E2.3.1.9, atoB; acetyl-CoA C-acetyltransferase [EC:2.3.1.9]
	Insect hormone biosynthesis
	sw14489	K10718	JHAMT; juvenile hormone acid methyltransferase [EC:2.1.1.-]
	sw18593	K10719	JHEH; juvenile hormone epoxide hydrolase
	sw01790	K10723	SHD, CYP314A1; ecdysone 20-monooxygenase [EC:1.14.99.22]
	Limonene and pinene degradation
	sw09712	K00128	E1.2.1.3; aldehyde dehydrogenase (NAD+) [EC:1.2.1.3]
	sw16279	K00517	E1.14.-.-; [EC:1.14.-.-]
	sw15116	K00517	E1.14.-.-; [EC:1.14.-.-]
	sw19491	K00517	E1.14.-.-; [EC:1.14.-.-]
	sw08815	K00517	E1.14.-.-; [EC:1.14.-.-]
	Geraniol degradation
	sw03490	K01640	E4.1.3.4, HMGCL, hmgL; hydroxymethylglutaryl-CoA lyase [EC:4.1.3.4]
	Biosynthesis of ansamycins
	sw00306	K00615	E2.2.1.1, tktA, tktB; transketolase [EC:2.2.1.1]
	Biosynthesis of siderophore group nonribosomal peptides
	sw14161	K04788	mbtB; mycobactin phenyloxazoline synthetase
Biosynthesis of other secondary metabolites
	Phenylpropanoid biosynthesis
	sw11637	K01188	E3.2.1.21; beta-glucosidase [EC:3.2.1.21]
	sw19262	K01188	E3.2.1.21; beta-glucosidase [EC:3.2.1.21]
	sw04028	K01188	E3.2.1.21; beta-glucosidase [EC:3.2.1.21]
	Stilbenoid, diarylheptanoid and gingerol biosynthesis
	sw16279	K00517	E1.14.-.-; [EC:1.14.-.-]
	sw15116	K00517	E1.14.-.-; [EC:1.14.-.-]
	sw19491	K00517	E1.14.-.-; [EC:1.14.-.-]
	sw08815	K00517	E1.14.-.-; [EC:1.14.-.-]
	Isoquinoline alkaloid biosynthesis
	sw10674	K14455	GOT2; aspartate aminotransferase, mitochondrial [EC:2.6.1.1]
	sw14438	K14455	GOT2; aspartate aminotransferase, mitochondrial [EC:2.6.1.1]
	sw13482	K00501	TH; tyrosine 3-monooxygenase [EC:1.14.16.2]
	Tropane, piperidine and pyridine alkaloid biosynthesis
	sw10674	K14455	GOT2; aspartate aminotransferase, mitochondrial [EC:2.6.1.1]
	sw14438	K14455	GOT2; aspartate aminotransferase, mitochondrial [EC:2.6.1.1]
	sw00734	K01066	E3.1.1.-; esterase / lipase [EC:3.1.1.-]
	Caffeine metabolism
	sw08784	K00106	XDH; xanthine dehydrogenase/oxidase [EC:1.17.1.4 1.17.3.2]
	sw08108	K00365	E1.7.3.3; urate oxidase [EC:1.7.3.3]
	Streptomycin biosynthesis
	sw17679	K01835	pgm; phosphoglucomutase [EC:5.4.2.2]
	sw17859	K01835	pgm; phosphoglucomutase [EC:5.4.2.2]
Xenobiotics biodegradation and metabolism
	Benzoate degradation
	sw19273	K07508	ACAA2; acetyl-CoA acyltransferase 2 [EC:2.3.1.16]
	sw07055	K07509	HADHB; acetyl-CoA acyltransferase [EC:2.3.1.16]
	sw13503	K07509	HADHB; acetyl-CoA acyltransferase [EC:2.3.1.16]
	sw19440	K07511	ECHS1; enoyl-CoA hydratase [EC:4.2.1.17]
	sw21913	K00626	E2.3.1.9, atoB; acetyl-CoA C-acetyltransferase [EC:2.3.1.9]
	sw22915	K00626	E2.3.1.9, atoB; acetyl-CoA C-acetyltransferase [EC:2.3.1.9]
	Aminobenzoate degradation
	sw16279	K00517	E1.14.-.-; [EC:1.14.-.-]
	sw15116	K00517	E1.14.-.-; [EC:1.14.-.-]
	sw19491	K00517	E1.14.-.-; [EC:1.14.-.-]
	sw08815	K00517	E1.14.-.-; [EC:1.14.-.-]
	sw19440	K07511	ECHS1; enoyl-CoA hydratase [EC:4.2.1.17]
	sw02887	K14338	cypD_E, CYP102A2_3; cytochrome P450 / NADPH-cytochrome P450 reductase [EC:1.14.14.1 1.6.2.4]
	sw06587	K01077	E3.1.3.1, phoA, phoB; alkaline phosphatase [EC:3.1.3.1]
	Chloroalkane and chloroalkene degradation
	sw09712	K00128	E1.2.1.3; aldehyde dehydrogenase (NAD+) [EC:1.2.1.3]
	sw19662	K00100	E1.1.1.-; [EC:1.1.1.-]
	sw22929	K00100	E1.1.1.-; [EC:1.1.1.-]
	Styrene degradation
	sw11963	K00451	HGD, hmgA; homogentisate 1,2-dioxygenase [EC:1.13.11.5]
	sw01333	K01555	FAH, fahA; fumarylacetoacetase [EC:3.7.1.2]
	Caprolactam degradation
	sw10994	K00002	AKR1A1, adh; alcohol dehydrogenase (NADP+) [EC:1.1.1.2]
	sw19440	K07511	ECHS1; enoyl-CoA hydratase [EC:4.2.1.17]
	Bisphenol degradation
	sw16279	K00517	E1.14.-.-; [EC:1.14.-.-]
	sw15116	K00517	E1.14.-.-; [EC:1.14.-.-]
	sw19491	K00517	E1.14.-.-; [EC:1.14.-.-]
	sw08815	K00517	E1.14.-.-; [EC:1.14.-.-]
	sw00734	K01066	E3.1.1.-; esterase / lipase [EC:3.1.1.-]
	sw19662	K00100	E1.1.1.-; [EC:1.1.1.-]
	sw22929	K00100	E1.1.1.-; [EC:1.1.1.-]
	Polycyclic aromatic hydrocarbon degradation
	sw16279	K00517	E1.14.-.-; [EC:1.14.-.-]
	sw15116	K00517	E1.14.-.-; [EC:1.14.-.-]
	sw19491	K00517	E1.14.-.-; [EC:1.14.-.-]
	sw08815	K00517	E1.14.-.-; [EC:1.14.-.-]
	Metabolism of xenobiotics by cytochrome P450
	sw02205	K00799	GST, gst; glutathione S-transferase [EC:2.5.1.18]
	sw15127	K00799	GST, gst; glutathione S-transferase [EC:2.5.1.18]
	sw13395	K00799	GST, gst; glutathione S-transferase [EC:2.5.1.18]
	sw15474	K00799	GST, gst; glutathione S-transferase [EC:2.5.1.18]
	sw13043	K00799	GST, gst; glutathione S-transferase [EC:2.5.1.18]
	sw21098	K00078	DHDH; dihydrodiol dehydrogenase / D-xylose 1-dehydrogenase (NADP) [EC:1.3.1.20 1.1.1.179]
	sw18911	K00129	E1.2.1.5; aldehyde dehydrogenase (NAD(P)+) [EC:1.2.1.5]
	sw22710	K00699	UGT; glucuronosyltransferase [EC:2.4.1.17]
	sw19163	K00699	UGT; glucuronosyltransferase [EC:2.4.1.17]
	sw18729	K00699	UGT; glucuronosyltransferase [EC:2.4.1.17]
	sw06973	K00699	UGT; glucuronosyltransferase [EC:2.4.1.17]
	Drug metabolism - cytochrome P450
	sw08708	K00485	E1.14.13.8; dimethylaniline monooxygenase (N-oxide forming) [EC:1.14.13.8]
	sw02205	K00799	GST, gst; glutathione S-transferase [EC:2.5.1.18]
	sw15127	K00799	GST, gst; glutathione S-transferase [EC:2.5.1.18]
	sw13395	K00799	GST, gst; glutathione S-transferase [EC:2.5.1.18]
	sw15474	K00799	GST, gst; glutathione S-transferase [EC:2.5.1.18]
	sw13043	K00799	GST, gst; glutathione S-transferase [EC:2.5.1.18]
	sw18911	K00129	E1.2.1.5; aldehyde dehydrogenase (NAD(P)+) [EC:1.2.1.5]
	sw22710	K00699	UGT; glucuronosyltransferase [EC:2.4.1.17]
	sw19163	K00699	UGT; glucuronosyltransferase [EC:2.4.1.17]
	sw18729	K00699	UGT; glucuronosyltransferase [EC:2.4.1.17]
	sw06973	K00699	UGT; glucuronosyltransferase [EC:2.4.1.17]
	Drug metabolism - other enzymes
	sw08784	K00106	XDH; xanthine dehydrogenase/oxidase [EC:1.17.1.4 1.17.3.2]
	sw22710	K00699	UGT; glucuronosyltransferase [EC:2.4.1.17]
	sw19163	K00699	UGT; glucuronosyltransferase [EC:2.4.1.17]
	sw18729	K00699	UGT; glucuronosyltransferase [EC:2.4.1.17]
	sw06973	K00699	UGT; glucuronosyltransferase [EC:2.4.1.17]
	sw20520	K00207	E1.3.1.2, DPYD; dihydropyrimidine dehydrogenase (NADP+) [EC:1.3.1.2]
	sw02334	K00207	E1.3.1.2, DPYD; dihydropyrimidine dehydrogenase (NADP+) [EC:1.3.1.2]
	sw18478	K00207	E1.3.1.2, DPYD; dihydropyrimidine dehydrogenase (NADP+) [EC:1.3.1.2]
	sw18510	K00207	E1.3.1.2, DPYD; dihydropyrimidine dehydrogenase (NADP+) [EC:1.3.1.2]
	sw14040	K01431	E3.5.1.6; beta-ureidopropionase [EC:3.5.1.6]
Genetic Information Processing
Transcription
	Spliceosome
	sw18960	K12823	DDX5, DBP2; ATP-dependent RNA helicase DDX5/DBP2 [EC:3.6.4.13]
	sw22585	K03283	HSPA1_8; heat shock 70kDa protein 1/8
Translation
	Ribosome
	sw21888	K02949	RP-S11e, RPS11; small subunit ribosomal protein S11e
	sw22859	K02886	RP-L2, MRPL2, rplB; large subunit ribosomal protein L2
	Aminoacyl-tRNA biosynthesis
	sw05224	K02434	gatB; aspartyl-tRNA(Asn)/glutamyl-tRNA (Gln) amidotransferase subunit B [EC:6.3.5.6 6.3.5.7]
	sw20364	K01893	NARS, asnS; asparaginyl-tRNA synthetase [EC:6.1.1.22]
	RNA transport
	sw13737	K09291	TPR; nucleoprotein TPR
	sw18991	K14296	NUP153; nuclear pore complex protein Nup153
	sw20834	K14303	NUP160; nuclear pore complex protein Nup160
	sw05889	K03251	EIF3D; translation initiation factor 3 subunit D
	sw06901	K03260	EIF4G; translation initiation factor 4G
	sw15810	K13126	PABPC; polyadenylate-binding protein
	mRNA surveillance pathway
	sw11055	K14407	CSTF2, RNA15; cleavage stimulation factor subunit 2
	sw15810	K13126	PABPC; polyadenylate-binding protein
	sw21416	K03456	PPP2R1; protein phosphatase 2 (formerly 2A), regulatory subunit A
	Ribosome biogenesis in eukaryotes
	sw14759	K03115	CSNK2B; casein kinase II subunit beta
	sw18789	K14544	UTP22, NOL6; U3 small nucleolar RNA-associated protein 22
	sw07686	K14545	RRP7; ribosomal RNA-processing protein 7
	sw06274	K14570	REX1, REXO1, RNH70; RNA exonuclease 1 [EC:3.1.-.-]
	sw12516	K14538	NUG1, GNL3; nuclear GTP-binding protein
	sw20862	K14573	NOP4, RBM28; nucleolar protein 4
	sw14949	K11883	NOB1; RNA-binding protein NOB1
Folding, sorting and degradation
	Protein export
	sw15643	K03106	SRP54, ffh; signal recognition particle subunit SRP54
	sw13452	K10956	SEC61A; protein transport protein SEC61 subunit alpha
	sw07544	K07342	SEC61G, SSS1, secE; protein transport protein SEC61 subunit gamma and related proteins
	sw18957	K09540	SEC63; translocation protein SEC63
	sw22190	K09540	SEC63; translocation protein SEC63
	sw08198	K09490	HSPA5, BIP; heat shock 70kDa protein 5
	sw00907	K13431	SRPR; signal recognition particle receptor subunit alpha
	sw07925	K12947	SPCS2, SPC2; signal peptidase complex subunit 2 [EC:3.4.-.-]
	Protein processing in endoplasmic reticulum
	sw13452	K10956	SEC61A; protein transport protein SEC61 subunit alpha
	sw07544	K07342	SEC61G, SSS1, secE; protein transport protein SEC61 subunit gamma and related proteins
	sw18957	K09540	SEC63; translocation protein SEC63
	sw22190	K09540	SEC63; translocation protein SEC63
	sw07956	K12670	WBP1; oligosaccharyltransferase complex subunit beta
	sw14420	K07151	STT3; dolichyl-diphosphooligosaccharide--protein glycosyltransferase [EC:2.4.99.18]
	sw18030	K07151	STT3; dolichyl-diphosphooligosaccharide--protein glycosyltransferase [EC:2.4.99.18]
	sw16184	K09486	HYOU1; hypoxia up-regulated 1
	sw08198	K09490	HSPA5, BIP; heat shock 70kDa protein 5
	sw03654	K09517	DNAJB11; DnaJ homolog subfamily B member 11
	sw17977	K09523	DNAJC3; DnaJ homolog subfamily C member 3
	sw01668	K09487	HSP90B, TRA1; heat shock protein 90kDa beta
	sw09820	K09487	HSP90B, TRA1; heat shock protein 90kDa beta
	sw07800	K05546	GANAB; alpha 1,3-glucosidase [EC:3.2.1.84]
	sw15222	K08288	PRKCSH; protein kinase C substrate 80K-H
	sw15752	K08288	PRKCSH; protein kinase C substrate 80K-H
	sw03612	K08056	PDIA3, GRP58; protein disulfide isomerase family A, member 3 [EC:5.3.4.1]
	sw16039	K08056	PDIA3, GRP58; protein disulfide isomerase family A, member 3 [EC:5.3.4.1]
	sw12517	K08057	CALR; calreticulin
	sw17492	K01230	MAN1; mannosyl-oligosaccharide alpha-1,2-mannosidase [EC:3.2.1.113]
	sw18931	K01230	MAN1; mannosyl-oligosaccharide alpha-1,2-mannosidase [EC:3.2.1.113]
	sw19096	K10080	LMAN1, ERGIC53; lectin, mannose-binding 1
	sw15024	K10086	EDEM3; ER degradation enhancer, mannosidase alpha-like 3
	sw14074	K09580	PDIA1, P4HB; protein disulfide-isomerase A1 [EC:5.3.4.1]
	sw08383	K09584	PDIA6, TXNDC7; protein disulfide-isomerase A6 [EC:5.3.4.1]
	sw10693	K14008	ERLEC1, XTP3B; endoplasmic reticulum lectin 1
	sw09674	K13249	SSR1; translocon-associated protein subunit alpha
	sw10891	K13250	SSR2; translocon-associated protein subunit beta
	sw03872	K13251	SSR3; translocon-associated protein subunit gamma
	sw13075	K14010	TRAM1; translocating chain-associated membrane protein 1
	sw01883	K11519	DERL1; Derlin-1
	sw00464	K13525	VCP, CDC48; transitional endoplasmic reticulum ATPase
	sw07877	K13525	VCP, CDC48; transitional endoplasmic reticulum ATPase
	sw14915	K13525	VCP, CDC48; transitional endoplasmic reticulum ATPase
	sw22585	K03283	HSPA1_8; heat shock 70kDa protein 1/8
	sw05107	K09541	CRYAA; crystallin, alpha A
	sw20098	K09542	CRYAB; crystallin, alpha B
	sw18898	K09542	CRYAB; crystallin, alpha B
	sw18662	K10575	UBE2G1, UBC7; ubiquitin-conjugating enzyme E2 G1 [EC:6.3.2.19]
	sw03436	K10601	SYVN1, HRD1; E3 ubiquitin-protein ligase synoviolin [EC:6.3.2.19]
	sw03906	K06689	UBE2D_E, UBC4, UBC5; ubiquitin-conjugating enzyme E2 D/E [EC:6.3.2.19]
	Ubiquitin mediated proteolysis
	sw03906	K06689	UBE2D_E, UBC4, UBC5; ubiquitin-conjugating enzyme E2 D/E [EC:6.3.2.19]
	sw18662	K10575	UBE2G1, UBC7; ubiquitin-conjugating enzyme E2 G1 [EC:6.3.2.19]
	sw08652	K05633	AIP5, WWP1; atrophin-1 interacting protein 5 (WW domain containing E3 ubiquitin protein ligase 1) [EC:6.3.2.19]
	sw16552	K10595	HERC2; E3 ubiquitin-protein ligase HERC2 [EC:6.3.2.19]
	sw22890	K04725	XIAP, BIRC4; E3 ubiquitin-protein ligase XIAP
	sw03436	K10601	SYVN1, HRD1; E3 ubiquitin-protein ligase synoviolin [EC:6.3.2.19]
	sw16374	K03362	FBXW1_11, BTRC, beta-TRCP; F-box and WD-40 domain protein 1/11
	sw20360	K10610	DDB1; DNA damage-binding protein 1
	Proteasome
	sw04021	K03028	PSMD2, RPN1; 26S proteasome regulatory subunit N1
	sw01587	K03032	PSMD1, RPN2; 26S proteasome regulatory subunit N2
	RNA degradation
	sw11732	K12603	CNOT6, CCR4; CCR4-NOT transcription complex subunit 6
	sw15810	K13126	PABPC; polyadenylate-binding protein
	sw19274	K01689	ENO, eno; enolase [EC:4.2.1.11]
	sw02311	K00962	pnp, PNPT1; polyribonucleotide nucleotidyltransferase [EC:2.7.7.8]
Replication and repair
	DNA replication
	sw16814	K07466	RFA1, RPA1, rpa; replication factor A1
	sw00863	K10747	LIG1; DNA ligase 1 [EC:6.5.1.1]
	Base excision repair
	sw00863	K10747	LIG1; DNA ligase 1 [EC:6.5.1.1]
	Nucleotide excision repair
	sw20360	K10610	DDB1; DNA damage-binding protein 1
	sw16814	K07466	RFA1, RPA1, rpa; replication factor A1
	sw00863	K10747	LIG1; DNA ligase 1 [EC:6.5.1.1]
	Mismatch repair
	sw16814	K07466	RFA1, RPA1, rpa; replication factor A1
	sw00863	K10747	LIG1; DNA ligase 1 [EC:6.5.1.1]
	Homologous recombination
	sw16814	K07466	RFA1, RPA1, rpa; replication factor A1
	Fanconi anemia pathway
	sw16814	K07466	RFA1, RPA1, rpa; replication factor A1
Environmental Information Processing
Membrane transport
	ABC transporters
	sw02400	K08712	ABCG2.SNQ2; ATP-binding cassette, subfamily G (WHITE), member 2, SNQ2
	sw20266	K08712	ABCG2.SNQ2; ATP-binding cassette, subfamily G (WHITE), member 2, SNQ2
	Bacterial secretion system
	sw15643	K03106	SRP54, ffh; signal recognition particle subunit SRP54
Signal transduction
	Two-component system
	sw06587	K01077	E3.1.3.1, phoA, phoB; alkaline phosphatase [EC:3.1.3.1]
	sw03153	K01915	glnA; glutamine synthetase [EC:6.3.1.2]
	sw07091	K01915	glnA; glutamine synthetase [EC:6.3.1.2]
	sw21168	K01915	glnA; glutamine synthetase [EC:6.3.1.2]
	sw21913	K00626	E2.3.1.9, atoB; acetyl-CoA C-acetyltransferase [EC:2.3.1.9]
	sw22915	K00626	E2.3.1.9, atoB; acetyl-CoA C-acetyltransferase [EC:2.3.1.9]
	sw15825	K08738	CYC; cytochrome c
	MAPK signaling pathway
	sw02005	K05315	CACNA1N; voltage-dependent calcium channel alpha 1, invertebrate
	sw11934	K06268	PPP3R, CNB; protein phosphatase 3, regulatory subunit
	sw02925	K04380	MAPT, TAU; microtubule-associated protein tau
	sw22045	K04428	MAP3K4, MEKK4; mitogen-activated protein kinase kinase kinase 4 [EC:2.7.11.25]
	sw12339	K04453	MAX; Max protein
	sw13175	K04455	HSPB1; heat shock protein beta-1
	sw22585	K03283	HSPA1_8; heat shock 70kDa protein 1/8
	sw21899	K04468	NLK; nemo like kinase [EC:2.7.11.24]
	sw22902	K04468	NLK; nemo like kinase [EC:2.7.11.24]
	MAPK signaling pathway - fly
	sw08783	K12377	TSL; torso-like protein
	sw22733	K02644	PHL; pole hole
	MAPK signaling pathway - yeast
	sw13737	K09291	TPR; nucleoprotein TPR
	ErbB signaling pathway
	sw03660	K04515	CAMK2; calcium/calmodulin-dependent protein kinase (CaM kinase) II [EC:2.7.11.17]
	sw16212	K11224	STAT5B; signal transducer and activator of transcription 5B
	Wnt signaling pathway
	sw21425	K00444	WNT5; wingless-type MMTV integration site family, member 5
	sw14759	K03115	CSNK2B; casein kinase II subunit beta
	sw14620	K02157	AXIN1; axin 1
	sw15120	K04496	CTBP; C-terminal binding protein
	sw21899	K04468	NLK; nemo like kinase [EC:2.7.11.24]
	sw22902	K04468	NLK; nemo like kinase [EC:2.7.11.24]
	sw16374	K03362	FBXW1_11, BTRC, beta-TRCP; F-box and WD-40 domain protein 1/11
	sw17981	K05858	PLCB; phosphatidylinositol phospholipase C, beta [EC:3.1.4.11]
	sw03660	K04515	CAMK2; calcium/calmodulin-dependent protein kinase (CaM kinase) II [EC:2.7.11.17]
	sw11934	K06268	PPP3R, CNB; protein phosphatase 3, regulatory subunit
	Notch signaling pathway
	sw22896	K06171	NCSTN; nicastrin
	sw15120	K04496	CTBP; C-terminal binding protein
	Hedgehog signaling pathway
	sw21425	K00444	WNT5; wingless-type MMTV integration site family, member 5
	sw00355	K04662	BMP2_4; bone morphogenetic protein 2/4
	sw16374	K03362	FBXW1_11, BTRC, beta-TRCP; F-box and WD-40 domain protein 1/11
	TGF-beta signaling pathway
	sw00355	K04662	BMP2_4; bone morphogenetic protein 2/4
	sw17409	K04500	SMAD2_3; mothers against decapentaplegic homolog 2/3
	sw21416	K03456	PPP2R1; protein phosphatase 2 (formerly 2A), regulatory subunit A
	Hippo signaling pathway
	sw21416	K03456	PPP2R1; protein phosphatase 2 (formerly 2A), regulatory subunit A
	sw16374	K03362	FBXW1_11, BTRC, beta-TRCP; F-box and WD-40 domain protein 1/11
	sw17409	K04500	SMAD2_3; mothers against decapentaplegic homolog 2/3
	sw00355	K04662	BMP2_4; bone morphogenetic protein 2/4
	sw21425	K00444	WNT5; wingless-type MMTV integration site family, member 5
	sw21948	K16197	YWHAB_Q_Z; 14-3-3 protein beta/theta/zeta
	sw14620	K02157	AXIN1; axin 1
	sw17388	K05692	ACTB_G1; actin beta/gamma 1
	sw21905	K05692	ACTB_G1; actin beta/gamma 1
	sw21906	K05692	ACTB_G1; actin beta/gamma 1
	sw22633	K05692	ACTB_G1; actin beta/gamma 1
	Hippo signaling pathway -fly
	sw16494	K16673	LIX1L; LIX1-like protein
	sw21416	K03456	PPP2R1; protein phosphatase 2 (formerly 2A), regulatory subunit A
	sw17388	K05692	ACTB_G1; actin beta/gamma 1
	sw21905	K05692	ACTB_G1; actin beta/gamma 1
	sw21906	K05692	ACTB_G1; actin beta/gamma 1
	sw22633	K05692	ACTB_G1; actin beta/gamma 1
	sw03959	K16683	EX; protein expanded
	sw21948	K16197	YWHAB_Q_Z; 14-3-3 protein beta/theta/zeta
	VEGF signaling pathway
	sw11934	K06268	PPP3R, CNB; protein phosphatase 3, regulatory subunit
	sw17435	K05760	PXN; paxillin
	sw13175	K04455	HSPB1; heat shock protein beta-1
	Jak-STAT signaling pathway
	sw16212	K11224	STAT5B; signal transducer and activator of transcription 5B
	NF-kappa B signaling pathway
	sw22890	K04725	XIAP, BIRC4; E3 ubiquitin-protein ligase XIAP
	sw14759	K03115	CSNK2B; casein kinase II subunit beta
	HIF-1 signaling pathway
	sw20525	K04527	INSR; insulin receptor [EC:2.7.10.1]
	sw03660	K04515	CAMK2; calcium/calmodulin-dependent protein kinase (CaM kinase) II [EC:2.7.11.17]
	sw01653	K07299	SLC2A1, GLUT1; MFS transporter, SP family, solute carrier family 2 (facilitated glucose transporter), member 1
	sw19274	K01689	ENO, eno; enolase [EC:4.2.1.11]
	Calcium signaling pathway
	sw01650	K05850	ATP2B; Ca2+ transporting ATPase, plasma membrane [EC:3.6.3.8]
	sw01413	K04809	CHRNA7; nicotinic acetylcholine receptor alpha-7
	sw17981	K05858	PLCB; phosphatidylinositol phospholipase C, beta [EC:3.1.4.11]
	sw15045	K00871	PHKG; phosphorylase kinase gamma subunit [EC:2.7.11.19]
	sw08094	K00907	MYLK; myosin-light-chain kinase [EC:2.7.11.18]
	sw03660	K04515	CAMK2; calcium/calmodulin-dependent protein kinase (CaM kinase) II [EC:2.7.11.17]
	sw11934	K06268	PPP3R, CNB; protein phosphatase 3, regulatory subunit
	sw11493	K13755	PDE1; calcium/calmodulin-dependent 3',5'-cyclic nucleotide phosphodiesterase [EC:3.1.4.17]
	Phosphatidylinositol signaling system
	sw09759	K00888	PI4K; phosphatidylinositol 4-kinase [EC:2.7.1.67]
	sw17708	K00901	E2.7.1.107, DGK, dgkA; diacylglycerol kinase (ATP dependent) [EC:2.7.1.107]
	sw17981	K05858	PLCB; phosphatidylinositol phospholipase C, beta [EC:3.1.4.11]
	PI3K-Akt signaling pathway
	sw20525	K04527	INSR; insulin receptor [EC:2.7.10.1]
	sw08684	K06237	COL4A; collagen, type IV, alpha
	sw17383	K06237	COL4A; collagen, type IV, alpha
	sw01258	K06240	LAMA3_5; laminin, alpha 3/5
	sw16006	K06240	LAMA3_5; laminin, alpha 3/5
	sw07873	K05636	LAMB1; laminin, beta 1
	sw11565	K05636	LAMB1; laminin, beta 1
	sw14147	K05635	LAMC1; laminin, gamma 1
	sw15794	K04659	THBS2S; thrombospondin 2/3/4/5
	sw01358	K03900	VWF; von Willebrand factor
	sw18286	K05719	ITGB1; integrin beta 1
	sw21416	K03456	PPP2R1; protein phosphatase 2 (formerly 2A), regulatory subunit A
	sw01668	K09487	HSP90B, TRA1; heat shock protein 90kDa beta
	sw09820	K09487	HSP90B, TRA1; heat shock protein 90kDa beta
	sw21948	K16197	YWHAB_Q_Z; 14-3-3 protein beta/theta/zeta
Signaling molecules and interaction
	Neuroactive ligand-receptor interaction
	sw12437	K04280	GNRHR; gonadotropin-releasing hormone receptor
	sw09048	K04577	CALCRL; calcitonin receptor-like
	sw01413	K04809	CHRNA7; nicotinic acetylcholine receptor alpha-7
	Cytokine-cytokine receptor interaction
	sw00355	K04662	BMP2_4; bone morphogenetic protein 2/4
	ECM-receptor interaction
	sw08684	K06237	COL4A; collagen, type IV, alpha
	sw17383	K06237	COL4A; collagen, type IV, alpha
	sw01258	K06240	LAMA3_5; laminin, alpha 3/5
	sw16006	K06240	LAMA3_5; laminin, alpha 3/5
	sw07873	K05636	LAMB1; laminin, beta 1
	sw11565	K05636	LAMB1; laminin, beta 1
	sw14147	K05635	LAMC1; laminin, gamma 1
	sw15794	K04659	THBS2S; thrombospondin 2/3/4/5
	sw01358	K03900	VWF; von Willebrand factor
	sw18286	K05719	ITGB1; integrin beta 1
	sw01260	K06258	SV2; MFS transporter, VNT family, synaptic vesicle glycoprotein 2
	Cell adhesion molecules (CAMs)
	sw18286	K05719	ITGB1; integrin beta 1
	sw00652	K05695	PTPRF, LAR; receptor-type tyrosine-protein phosphatase F [EC:3.1.3.48]
	sw00653	K05695	PTPRF, LAR; receptor-type tyrosine-protein phosphatase F [EC:3.1.3.48]
Cellular Processes
Transport and catabolism
	Endocytosis
	sw17409	K04500	SMAD2_3; mothers against decapentaplegic homolog 2/3
	sw08652	K05633	AIP5, WWP1; atrophin-1 interacting protein 5 (WW domain containing E3 ubiquitin protein ligase 1) [EC:6.3.2.19]
	sw22585	K03283	HSPA1_8; heat shock 70kDa protein 1/8
	Phagosome
	sw17388	K05692	ACTB_G1; actin beta/gamma 1
	sw21905	K05692	ACTB_G1; actin beta/gamma 1
	sw21906	K05692	ACTB_G1; actin beta/gamma 1
	sw22633	K05692	ACTB_G1; actin beta/gamma 1
	sw22916	K02145	ATPeVA, ATP6A1; V-type H+-transporting ATPase subunit A [EC:3.6.3.14]
	sw00795	K02147	ATPeVB, ATP6B1; V-type H+-transporting ATPase subunit B [EC:3.6.3.14]
	sw14354	K02148	ATPeVC, ATP6C; V-type H+-transporting ATPase subunit C [EC:3.6.3.14]
	sw14793	K02150	ATPeVE, ATP6E; V-type H+-transporting ATPase subunit E [EC:3.6.3.14]
	sw13277	K02152	ATPeVG, ATP6G1; V-type H+-transporting ATPase subunit G [EC:3.6.3.14]
	sw04026	K02154	ATPeVI, ATP6N1A; V-type H+-transporting ATPase subunit I [EC:3.6.3.14]
	sw09128	K02154	ATPeVI, ATP6N1A; V-type H+-transporting ATPase subunit I [EC:3.6.3.14]
	sw09511	K02154	ATPeVI, ATP6N1A; V-type H+-transporting ATPase subunit I [EC:3.6.3.14]
	sw09888	K02146	ATPeVAC39, ATP6D; V-type H+-transporting ATPase subunit AC39 [EC:3.6.3.14]
	sw21938	K02144	ATPeV54kD; V-type H+-transporting ATPase 54 kD subunit [EC:3.6.3.14]
	sw07674	K02155	ATPeVPL, ATP6L; V-type H+-transporting ATPase 16kDa proteolipid subunit [EC:3.6.3.14]
	sw14397	K03661	ATPeVPF, ATP6F; V-type H+-transporting ATPase 21kDa proteolipid subunit [EC:3.6.3.14]
	sw19848	K10415	DYNC1I, DNCI; dynein intermediate chain, cytosolic
	sw21719	K07374	TUBA; tubulin alpha
	sw22939	K07374	TUBA; tubulin alpha
	sw17349	K07375	TUBB; tubulin beta
	sw13452	K10956	SEC61A; protein transport protein SEC61 subunit alpha
	sw07544	K07342	SEC61G, SSS1, secE; protein transport protein SEC61 subunit gamma and related proteins
	sw12517	K08057	CALR; calreticulin
	sw18286	K05719	ITGB1; integrin beta 1
	sw15794	K04659	THBS2S; thrombospondin 2/3/4/5
	Lysosome
	sw04026	K02154	ATPeVI, ATP6N1A; V-type H+-transporting ATPase subunit I [EC:3.6.3.14]
	sw09128	K02154	ATPeVI, ATP6N1A; V-type H+-transporting ATPase subunit I [EC:3.6.3.14]
	sw09511	K02154	ATPeVI, ATP6N1A; V-type H+-transporting ATPase subunit I [EC:3.6.3.14]
	sw09888	K02146	ATPeVAC39, ATP6D; V-type H+-transporting ATPase subunit AC39 [EC:3.6.3.14]
	sw21938	K02144	ATPeV54kD; V-type H+-transporting ATPase 54 kD subunit [EC:3.6.3.14]
	sw07674	K02155	ATPeVPL, ATP6L; V-type H+-transporting ATPase 16kDa proteolipid subunit [EC:3.6.3.14]
	sw14397	K03661	ATPeVPF, ATP6F; V-type H+-transporting ATPase 21kDa proteolipid subunit [EC:3.6.3.14]
	sw04192	K13289	CTSA; cathepsin A (carboxypeptidase C) [EC:3.4.16.5]
	sw12347	K01363	CTSB; cathepsin B [EC:3.4.22.1]
	sw11819	K01379	CTSD; cathepsin D [EC:3.4.23.5]
	sw20123	K01373	CTSF; cathepsin F [EC:3.4.22.41]
	sw07028	K01189	GLA; alpha-galactosidase [EC:3.2.1.22]
	sw09747	K01189	GLA; alpha-galactosidase [EC:3.2.1.22]
	sw05025	K12309	GLB1, ELNR1; beta-galactosidase [EC:3.2.1.23]
	sw15372	K01201	GBA, srfJ; glucosylceramidase [EC:3.2.1.45]
	sw11201	K01205	NAGLU; alpha-N-acetylglucosaminidase [EC:3.2.1.50]
	sw19182	K12373	HEXA_B; hexosaminidase [EC:3.2.1.52]
	sw18447	K12373	HEXA_B; hexosaminidase [EC:3.2.1.52]
	sw20215	K12373	HEXA_B; hexosaminidase [EC:3.2.1.52]
	sw22618	K12373	HEXA_B; hexosaminidase [EC:3.2.1.52]
	sw20948	K12311	MAN2B1, LAMAN; lysosomal alpha-mannosidase [EC:3.2.1.24]
	sw14847	K01135	ARSB; arylsulfatase B [EC:3.1.6.12]
	sw15812	K01137	GNS; N-acetylglucosamine-6-sulfatase [EC:3.1.6.14]
	sw18395	K01137	GNS; N-acetylglucosamine-6-sulfatase [EC:3.1.6.14]
	sw06076	K12350	SMPD1, ASM; sphingomyelin phosphodiesterase [EC:3.1.4.12]
	sw11624	K12350	SMPD1, ASM; sphingomyelin phosphodiesterase [EC:3.1.4.12]
	sw14648	K12382	PSAP, SGP1; saposin
	sw19810	K12382	PSAP, SGP1; saposin
	sw03915	K01074	PPT; palmitoyl-protein thioesterase [EC:3.1.2.22]
	sw00887	K13443	NPC2; Niemann-Pick C2 protein
	sw11619	K13443	NPC2; Niemann-Pick C2 protein
	sw04363	K12397	AP3B; AP-3 complex subunit beta
	Peroxisome
	sw00457	K13347	PXMP2, PMP22; peroxisomal membrane protein 2
	sw09186	K00477	E1.14.11.18, PHYH; phytanoyl-CoA hydroxylase [EC:1.14.11.18]
	sw14804	K00232	E1.3.3.6, ACOX1, ACOX3; acyl-CoA oxidase [EC:1.3.3.6]
	sw14881	K01897	ACSL, fadD; long-chain acyl-CoA synthetase [EC:6.2.1.3]
	sw22869	K13355	NUDT19; nucleoside diphosphate-linked moiety X motif 19, mitochondrial [EC:3.6.1.-]
	sw09099	K13356	FAR; fatty acyl-CoA reductase [EC:1.2.1.-]
	sw01800	K00830	AGXT; alanine-glyoxylate transaminase / serine-glyoxylate transaminase / serine-pyruvate transaminase [EC:2.6.1.44 2.6.1.45 2.6.1.51]
	sw06329	K00031	IDH1, IDH2, icd; isocitrate dehydrogenase [EC:1.1.1.42]
	sw03490	K01640	E4.1.3.4, HMGCL, hmgL; hydroxymethylglutaryl-CoA lyase [EC:4.1.3.4]
	sw09451	K11517	HAO; (S)-2-hydroxy-acid oxidase [EC:1.1.3.15]
	sw16181	K11517	HAO; (S)-2-hydroxy-acid oxidase [EC:1.1.3.15]
	sw03619	K03781	katE, CAT, catB, srpA; catalase [EC:1.11.1.6]
	sw14555	K04565	SOD1; superoxide dismutase, Cu-Zn family [EC:1.15.1.1]
	sw08784	K00106	XDH; xanthine dehydrogenase/oxidase [EC:1.17.1.4 1.17.3.2]
	Regulation of autophagy
	sw13738	K08341	GABARAP, ATG8, LC3; GABA(A) receptor-associated protein (autophagy-related protein 8)
Cell motility
	Regulation of actin cytoskeleton
	sw18286	K05719	ITGB1; integrin beta 1
	sw08094	K00907	MYLK; myosin-light-chain kinase [EC:2.7.11.18]
	sw17388	K05692	ACTB_G1; actin beta/gamma 1
	sw21905	K05692	ACTB_G1; actin beta/gamma 1
	sw21906	K05692	ACTB_G1; actin beta/gamma 1
	sw22633	K05692	ACTB_G1; actin beta/gamma 1
	sw12681	K05759	PFN; profilin
	sw17435	K05760	PXN; paxillin
	sw04646	K05765	CFL; cofilin
	sw04649	K05700	VCL; vinculin
	sw01574	K05768	GSN; gelsolin
Cell growth and death
	Cell cycle - Caulobacter
	sw15247	K03544	clpX, CLPX; ATP-dependent Clp protease ATP-binding subunit ClpX
	Meiosis - yeast
	sw21416	K03456	PPP2R1; protein phosphatase 2 (formerly 2A), regulatory subunit A
	Oocyte meiosis
	sw21948	K16197	YWHAB_Q_Z; 14-3-3 protein beta/theta/zeta
	sw09022	K06631	PLK1; polo-like kinase 1 [EC:2.7.11.21]
	sw16374	K03362	FBXW1_11, BTRC, beta-TRCP; F-box and WD-40 domain protein 1/11
	sw21416	K03456	PPP2R1; protein phosphatase 2 (formerly 2A), regulatory subunit A
	sw11934	K06268	PPP3R, CNB; protein phosphatase 3, regulatory subunit
	sw03660	K04515	CAMK2; calcium/calmodulin-dependent protein kinase (CaM kinase) II [EC:2.7.11.17]
	Apoptosis
	sw22890	K04725	XIAP, BIRC4; E3 ubiquitin-protein ligase XIAP
	sw15825	K08738	CYC; cytochrome c
	sw21070	K04739	PRKAR; cAMP-dependent protein kinase regulator
	sw11934	K06268	PPP3R, CNB; protein phosphatase 3, regulatory subunit
	p53 signaling pathway
	sw15825	K08738	CYC; cytochrome c
	sw04795	K10808	RRM2; ribonucleoside-diphosphate reductase subunit M2 [EC:1.17.4.1]
Cell communication
	Focal adhesion
	sw08684	K06237	COL4A; collagen, type IV, alpha
	sw17383	K06237	COL4A; collagen, type IV, alpha
	sw01258	K06240	LAMA3_5; laminin, alpha 3/5
	sw16006	K06240	LAMA3_5; laminin, alpha 3/5
	sw07873	K05636	LAMB1; laminin, beta 1
	sw11565	K05636	LAMB1; laminin, beta 1
	sw14147	K05635	LAMC1; laminin, gamma 1
	sw15794	K04659	THBS2S; thrombospondin 2/3/4/5
	sw01358	K03900	VWF; von Willebrand factor
	sw18286	K05719	ITGB1; integrin beta 1
	sw08094	K00907	MYLK; myosin-light-chain kinase [EC:2.7.11.18]
	sw17388	K05692	ACTB_G1; actin beta/gamma 1
	sw21905	K05692	ACTB_G1; actin beta/gamma 1
	sw21906	K05692	ACTB_G1; actin beta/gamma 1
	sw22633	K05692	ACTB_G1; actin beta/gamma 1
	sw17435	K05760	PXN; paxillin
	sw04649	K05700	VCL; vinculin
	sw22890	K04725	XIAP, BIRC4; E3 ubiquitin-protein ligase XIAP
	Adherens junction
	sw04649	K05700	VCL; vinculin
	sw17388	K05692	ACTB_G1; actin beta/gamma 1
	sw21905	K05692	ACTB_G1; actin beta/gamma 1
	sw21906	K05692	ACTB_G1; actin beta/gamma 1
	sw22633	K05692	ACTB_G1; actin beta/gamma 1
	sw00652	K05695	PTPRF, LAR; receptor-type tyrosine-protein phosphatase F [EC:3.1.3.48]
	sw00653	K05695	PTPRF, LAR; receptor-type tyrosine-protein phosphatase F [EC:3.1.3.48]
	sw14759	K03115	CSNK2B; casein kinase II subunit beta
	sw20525	K04527	INSR; insulin receptor [EC:2.7.10.1]
	sw17409	K04500	SMAD2_3; mothers against decapentaplegic homolog 2/3
	sw21899	K04468	NLK; nemo like kinase [EC:2.7.11.24]
	sw22902	K04468	NLK; nemo like kinase [EC:2.7.11.24]
	Tight junction
	sw21416	K03456	PPP2R1; protein phosphatase 2 (formerly 2A), regulatory subunit A
	sw14759	K03115	CSNK2B; casein kinase II subunit beta
	sw17388	K05692	ACTB_G1; actin beta/gamma 1
	sw21905	K05692	ACTB_G1; actin beta/gamma 1
	sw21906	K05692	ACTB_G1; actin beta/gamma 1
	sw22633	K05692	ACTB_G1; actin beta/gamma 1
	sw12898	K10352	MYH; myosin heavy chain
	sw12899	K10352	MYH; myosin heavy chain
	sw01185	K06103	CASK; calcium/calmodulin-dependent serine protein kinase [EC:2.7.11.1]
	Gap junction
	sw21719	K07374	TUBA; tubulin alpha
	sw22939	K07374	TUBA; tubulin alpha
	sw17349	K07375	TUBB; tubulin beta
	sw17981	K05858	PLCB; phosphatidylinositol phospholipase C, beta [EC:3.1.4.11]
Organismal Systems
Immune system
	Hematopoietic cell lineage
	sw01658	K11140	ANPEP; aminopeptidase N [EC:3.4.11.2]
	sw16520	K11140	ANPEP; aminopeptidase N [EC:3.4.11.2]
	Complement and coagulation cascades
	sw01358	K03900	VWF; von Willebrand factor
	NOD-like receptor signaling pathway
	sw01668	K09487	HSP90B, TRA1; heat shock protein 90kDa beta
	sw09820	K09487	HSP90B, TRA1; heat shock protein 90kDa beta
	RIG-I-like receptor signaling pathway
	sw05928	K00863	E2.7.1.29, DAK1, DAK2; dihydroxyacetone kinase [EC:2.7.1.29]
	Natural killer cell mediated cytotoxicity
	sw11934	K06268	PPP3R, CNB; protein phosphatase 3, regulatory subunit
	Antigen processing and presentation
	sw22585	K03283	HSPA1_8; heat shock 70kDa protein 1/8
	sw03612	K08056	PDIA3, GRP58; protein disulfide isomerase family A, member 3 [EC:5.3.4.1]
	sw16039	K08056	PDIA3, GRP58; protein disulfide isomerase family A, member 3 [EC:5.3.4.1]
	sw12517	K08057	CALR; calreticulin
	sw17949	K08059	IFI30, GILT; interferon, gamma-inducible protein 30
	sw19279	K08059	IFI30, GILT; interferon, gamma-inducible protein 30
	sw12347	K01363	CTSB; cathepsin B [EC:3.4.22.1]
	T cell receptor signaling pathway
	sw11934	K06268	PPP3R, CNB; protein phosphatase 3, regulatory subunit
	B cell receptor signaling pathway
	sw11934	K06268	PPP3R, CNB; protein phosphatase 3, regulatory subunit
	Fc epsilon RI signaling pathway
	Fc gamma R-mediated phagocytosis
	sw03391	K01080	PPAP2; phosphatidate phosphatase [EC:3.1.3.4]
	sw01574	K05768	GSN; gelsolin
	sw04646	K05765	CFL; cofilin
	sw12504	K12562	AMPH; amphiphysin
	Leukocyte transendothelial migration
	sw18286	K05719	ITGB1; integrin beta 1
	sw17388	K05692	ACTB_G1; actin beta/gamma 1
	sw21905	K05692	ACTB_G1; actin beta/gamma 1
	sw21906	K05692	ACTB_G1; actin beta/gamma 1
	sw22633	K05692	ACTB_G1; actin beta/gamma 1
	sw17435	K05760	PXN; paxillin
	sw04649	K05700	VCL; vinculin
	Chemokine signaling pathway
	sw16212	K11224	STAT5B; signal transducer and activator of transcription 5B
	sw17435	K05760	PXN; paxillin
	sw17981	K05858	PLCB; phosphatidylinositol phospholipase C, beta [EC:3.1.4.11]
Endocrine system
	Insulin secretion
	sw01653	K07299	SLC2A1, GLUT1; MFS transporter, SP family, solute carrier family 2 (facilitated glucose transporter), member 1
	sw03233	K01540	ATP1B; sodium/potassium-transporting ATPase subunit beta
	sw18497	K01540	ATP1B; sodium/potassium-transporting ATPase subunit beta
	sw03660	K04515	CAMK2; calcium/calmodulin-dependent protein kinase (CaM kinase) II [EC:2.7.11.17]
	sw17981	K05858	PLCB; phosphatidylinositol phospholipase C, beta [EC:3.1.4.11]
	Insulin signaling pathway
	sw20525	K04527	INSR; insulin receptor [EC:2.7.10.1]
	sw14127	K07189	PPP1R3; protein phosphatase 1, regulatory (inhibitor) subunit 3
	sw15045	K00871	PHKG; phosphorylase kinase gamma subunit [EC:2.7.11.19]
	sw20784	K00688	E2.4.1.1, glgP, PYG; starch phosphorylase [EC:2.4.1.1]
	sw21070	K04739	PRKAR; cAMP-dependent protein kinase regulator
	sw20168	K00665	FASN; fatty acid synthase, animal type [EC:2.3.1.85]
	sw12555	K00665	FASN; fatty acid synthase, animal type [EC:2.3.1.85]
	sw04448	K03841	FBP, fbp; fructose-1,6-bisphosphatase I [EC:3.1.3.11]
	sw00652	K05695	PTPRF, LAR; receptor-type tyrosine-protein phosphatase F [EC:3.1.3.48]
	sw00653	K05695	PTPRF, LAR; receptor-type tyrosine-protein phosphatase F [EC:3.1.3.48]
	Adipocytokine signaling pathway
	sw14881	K01897	ACSL, fadD; long-chain acyl-CoA synthetase [EC:6.2.1.3]
	sw01653	K07299	SLC2A1, GLUT1; MFS transporter, SP family, solute carrier family 2 (facilitated glucose transporter), member 1
	PPAR signaling pathway
	sw04284	K08745	SLC27A1_4, FATP1, FATP4; solute carrier family 27 (fatty acid transporter), member 1/4 [EC:6.2.1.-]
	sw16160	K08745	SLC27A1_4, FATP1, FATP4; solute carrier family 27 (fatty acid transporter), member 1/4 [EC:6.2.1.-]
	sw18173	K00507	SCD, desC; stearoyl-CoA desaturase (delta-9 desaturase) [EC:1.14.19.1]
	sw22744	K00507	SCD, desC; stearoyl-CoA desaturase (delta-9 desaturase) [EC:1.14.19.1]
	sw20866	K00507	SCD, desC; stearoyl-CoA desaturase (delta-9 desaturase) [EC:1.14.19.1]
	sw11269	K00507	SCD, desC; stearoyl-CoA desaturase (delta-9 desaturase) [EC:1.14.19.1]
	sw13636	K00507	SCD, desC; stearoyl-CoA desaturase (delta-9 desaturase) [EC:1.14.19.1]
	sw00813	K08762	DBI, ACBP; diazepam-binding inhibitor (GABA receptor modulator, acyl-CoA-binding protein)
	sw06932	K08762	DBI, ACBP; diazepam-binding inhibitor (GABA receptor modulator, acyl-CoA-binding protein)
	sw14881	K01897	ACSL, fadD; long-chain acyl-CoA synthetase [EC:6.2.1.3]
	sw14804	K00232	E1.3.3.6, ACOX1, ACOX3; acyl-CoA oxidase [EC:1.3.3.6]
	GnRH signaling pathway
	sw12437	K04280	GNRHR; gonadotropin-releasing hormone receptor
	sw17981	K05858	PLCB; phosphatidylinositol phospholipase C, beta [EC:3.1.4.11]
	sw03660	K04515	CAMK2; calcium/calmodulin-dependent protein kinase (CaM kinase) II [EC:2.7.11.17]
	sw22045	K04428	MAP3K4, MEKK4; mitogen-activated protein kinase kinase kinase 4 [EC:2.7.11.25]
	Ovarian Steroidogenesis
	sw20525	K04527	INSR; insulin receptor [EC:2.7.10.1]
	Estrogen signaling pathway
	sw01668	K09487	HSP90B, TRA1; heat shock protein 90kDa beta
	sw09820	K09487	HSP90B, TRA1; heat shock protein 90kDa beta
	sw22585	K03283	HSPA1_8; heat shock 70kDa protein 1/8
	sw17981	K05858	PLCB; phosphatidylinositol phospholipase C, beta [EC:3.1.4.11]
	Progesterone-mediated oocyte maturation
	sw09022	K06631	PLK1; polo-like kinase 1 [EC:2.7.11.21]
	Prolactin signaling pathway
	sw16212	K11224	STAT5B; signal transducer and activator of transcription 5B
	sw13482	K00501	TH; tyrosine 3-monooxygenase [EC:1.14.16.2]
	Thyroid hormone synthesis
	sw17981	K05858	PLCB; phosphatidylinositol phospholipase C, beta [EC:3.1.4.11]
	sw17705	K15173	TTF2; transcription termination factor 2 [EC:3.6.4.-]
	sw08198	K09490	HSPA5, BIP; heat shock 70kDa protein 5
	sw01668	K09487	HSP90B, TRA1; heat shock protein 90kDa beta
	sw09820	K09487	HSP90B, TRA1; heat shock protein 90kDa beta
	sw03233	K01540	ATP1B; sodium/potassium-transporting ATPase subunit beta
	sw18497	K01540	ATP1B; sodium/potassium-transporting ATPase subunit beta
	sw12271	K17231	IYD, DEHAL1; iodotyrosine deiodinase [EC:1.22.1.1]
	Melanogenesis
	sw21425	K00444	WNT5; wingless-type MMTV integration site family, member 5
	sw17981	K05858	PLCB; phosphatidylinositol phospholipase C, beta [EC:3.1.4.11]
	sw03660	K04515	CAMK2; calcium/calmodulin-dependent protein kinase (CaM kinase) II [EC:2.7.11.17]
	Renin-angiotensin system
	sw00643	K01283	E3.4.15.1, ACE; peptidyl-dipeptidase A [EC:3.4.15.1]
	sw16829	K11141	ENPEP; glutamyl aminopeptidase [EC:3.4.11.7]
	sw01658	K11140	ANPEP; aminopeptidase N [EC:3.4.11.2]
	sw16520	K11140	ANPEP; aminopeptidase N [EC:3.4.11.2]
	sw04192	K13289	CTSA; cathepsin A (carboxypeptidase C) [EC:3.4.16.5]
Circulatory system
	Cardiac muscle contraction
	sw13994	K09290	TPM3; tropomyosin 3
	sw13995	K10375	TPM4; tropomyosin 4
	sw03233	K01540	ATP1B; sodium/potassium-transporting ATPase subunit beta
	sw18497	K01540	ATP1B; sodium/potassium-transporting ATPase subunit beta
	Vascular smooth muscle contraction
	sw00954	K01047	PLA2G, SPLA2; secretory phospholipase A2 [EC:3.1.1.4]
	sw08094	K00907	MYLK; myosin-light-chain kinase [EC:2.7.11.18]
	sw14604	K12751	MYL6; myosin light chain 6
	sw17981	K05858	PLCB; phosphatidylinositol phospholipase C, beta [EC:3.1.4.11]
	sw09048	K04577	CALCRL; calcitonin receptor-like
Digestive system
	Salivary secretion
	sw17981	K05858	PLCB; phosphatidylinositol phospholipase C, beta [EC:3.1.4.11]
	sw03233	K01540	ATP1B; sodium/potassium-transporting ATPase subunit beta
	sw18497	K01540	ATP1B; sodium/potassium-transporting ATPase subunit beta
	sw01650	K05850	ATP2B; Ca2+ transporting ATPase, plasma membrane [EC:3.6.3.8]
	sw13847	K13915	LYZ; lysozyme C [EC:3.2.1.17]
	Gastric acid secretion
	sw17981	K05858	PLCB; phosphatidylinositol phospholipase C, beta [EC:3.1.4.11]
	sw03660	K04515	CAMK2; calcium/calmodulin-dependent protein kinase (CaM kinase) II [EC:2.7.11.17]
	sw08094	K00907	MYLK; myosin-light-chain kinase [EC:2.7.11.18]
	sw03233	K01540	ATP1B; sodium/potassium-transporting ATPase subunit beta
	sw18497	K01540	ATP1B; sodium/potassium-transporting ATPase subunit beta
	Pancreatic secretion
	sw17981	K05858	PLCB; phosphatidylinositol phospholipase C, beta [EC:3.1.4.11]
	sw13499	K12298	CEL; bile salt-stimulated lipase [EC:3.1.1.3 3.1.1.13]
	sw00954	K01047	PLA2G, SPLA2; secretory phospholipase A2 [EC:3.1.1.4]
	sw03233	K01540	ATP1B; sodium/potassium-transporting ATPase subunit beta
	sw18497	K01540	ATP1B; sodium/potassium-transporting ATPase subunit beta
	sw01650	K05850	ATP2B; Ca2+ transporting ATPase, plasma membrane [EC:3.6.3.8]
	Bile secretion
	sw03233	K01540	ATP1B; sodium/potassium-transporting ATPase subunit beta
	sw18497	K01540	ATP1B; sodium/potassium-transporting ATPase subunit beta
	sw01653	K07299	SLC2A1, GLUT1; MFS transporter, SP family, solute carrier family 2 (facilitated glucose transporter), member 1
	Carbohydrate digestion and absorption
	sw13002	K01176	E3.2.1.1, amyA, malS; alpha-amylase [EC:3.2.1.1]
	sw03233	K01540	ATP1B; sodium/potassium-transporting ATPase subunit beta
	sw18497	K01540	ATP1B; sodium/potassium-transporting ATPase subunit beta
	Protein digestion and absorption
	sw12646	K14206	SLC15A1, PEPT1; solute carrier family 15 (oligopeptide transporter), member 1
	sw13479	K14206	SLC15A1, PEPT1; solute carrier family 15 (oligopeptide transporter), member 1
	sw03233	K01540	ATP1B; sodium/potassium-transporting ATPase subunit beta
	sw18497	K01540	ATP1B; sodium/potassium-transporting ATPase subunit beta
	sw14860	K01285	PRCP; lysosomal Pro-X carboxypeptidase [EC:3.4.16.2]
	sw08684	K06237	COL4A; collagen, type IV, alpha
	sw17383	K06237	COL4A; collagen, type IV, alpha
	Fat digestion and absorption
	sw13499	K12298	CEL; bile salt-stimulated lipase [EC:3.1.1.3 3.1.1.13]
	sw00954	K01047	PLA2G, SPLA2; secretory phospholipase A2 [EC:3.1.1.4]
	sw10674	K14455	GOT2; aspartate aminotransferase, mitochondrial [EC:2.6.1.1]
	sw14438	K14455	GOT2; aspartate aminotransferase, mitochondrial [EC:2.6.1.1]
	sw03391	K01080	PPAP2; phosphatidate phosphatase [EC:3.1.3.4]
	sw17700	K14462	APOB; apolipoprotein B
	Vitamin digestion and absorption
	sw06416	K14616	CUBN; cubilin
	sw17700	K14462	APOB; apolipoprotein B
	Mineral absorption
	sw03233	K01540	ATP1B; sodium/potassium-transporting ATPase subunit beta
	sw18497	K01540	ATP1B; sodium/potassium-transporting ATPase subunit beta
	sw07281	K14686	SLC31A1, CTR1; solute carrier family 31 (copper transporter), member 1
Excretory system
	Vasopressin-regulated water reabsorption
	sw19848	K10415	DYNC1I, DNCI; dynein intermediate chain, cytosolic
	sw09626	K10426	DCTN4; dynactin 4
	Aldosterone-regulated sodium reabsorption
	sw03233	K01540	ATP1B; sodium/potassium-transporting ATPase subunit beta
	sw18497	K01540	ATP1B; sodium/potassium-transporting ATPase subunit beta
	sw20525	K04527	INSR; insulin receptor [EC:2.7.10.1]
	Endocrine and other factor-regulated calcium reabsorption
	sw03233	K01540	ATP1B; sodium/potassium-transporting ATPase subunit beta
	sw18497	K01540	ATP1B; sodium/potassium-transporting ATPase subunit beta
	sw17981	K05858	PLCB; phosphatidylinositol phospholipase C, beta [EC:3.1.4.11]
	Proximal tubule bicarbonate reclamation
	sw03233	K01540	ATP1B; sodium/potassium-transporting ATPase subunit beta
	sw18497	K01540	ATP1B; sodium/potassium-transporting ATPase subunit beta
	sw12457	K00261	GLUD1_2, gdhA; glutamate dehydrogenase (NAD(P)+) [EC:1.4.1.3]
	sw06088	K00025	MDH1; malate dehydrogenase [EC:1.1.1.37]
	Collecting duct acid secretion
	sw22916	K02145	ATPeVA, ATP6A1; V-type H+-transporting ATPase subunit A [EC:3.6.3.14]
	sw00795	K02147	ATPeVB, ATP6B1; V-type H+-transporting ATPase subunit B [EC:3.6.3.14]
	sw13277	K02152	ATPeVG, ATP6G1; V-type H+-transporting ATPase subunit G [EC:3.6.3.14]
	sw14354	K02148	ATPeVC, ATP6C; V-type H+-transporting ATPase subunit C [EC:3.6.3.14]
	sw14793	K02150	ATPeVE, ATP6E; V-type H+-transporting ATPase subunit E [EC:3.6.3.14]
	sw04026	K02154	ATPeVI, ATP6N1A; V-type H+-transporting ATPase subunit I [EC:3.6.3.14]
	sw09128	K02154	ATPeVI, ATP6N1A; V-type H+-transporting ATPase subunit I [EC:3.6.3.14]
	sw09511	K02154	ATPeVI, ATP6N1A; V-type H+-transporting ATPase subunit I [EC:3.6.3.14]
	sw07674	K02155	ATPeVPL, ATP6L; V-type H+-transporting ATPase 16kDa proteolipid subunit [EC:3.6.3.14]
	sw09888	K02146	ATPeVAC39, ATP6D; V-type H+-transporting ATPase subunit AC39 [EC:3.6.3.14]
Nervous system
	Glutamatergic synapse
	sw11934	K06268	PPP3R, CNB; protein phosphatase 3, regulatory subunit
	sw17981	K05858	PLCB; phosphatidylinositol phospholipase C, beta [EC:3.1.4.11]
	sw03153	K01915	glnA; glutamine synthetase [EC:6.3.1.2]
	sw07091	K01915	glnA; glutamine synthetase [EC:6.3.1.2]
	sw21168	K01915	glnA; glutamine synthetase [EC:6.3.1.2]
	GABAergic synapse
	sw03110	K13524	ABAT; 4-aminobutyrate aminotransferase / (S)-3-amino-2-methylpropionate transaminase [EC:2.6.1.19 2.6.1.22]
	sw13738	K08341	GABARAP, ATG8, LC3; GABA(A) receptor-associated protein (autophagy-related protein 8)
	sw10976	K15376	GPHN; gephyrin [EC:2.10.1.1 2.7.7.75]
	sw03153	K01915	glnA; glutamine synthetase [EC:6.3.1.2]
	sw07091	K01915	glnA; glutamine synthetase [EC:6.3.1.2]
	sw21168	K01915	glnA; glutamine synthetase [EC:6.3.1.2]
	Cholinergic synapse
	sw17981	K05858	PLCB; phosphatidylinositol phospholipase C, beta [EC:3.1.4.11]
	sw01413	K04809	CHRNA7; nicotinic acetylcholine receptor alpha-7
	sw03660	K04515	CAMK2; calcium/calmodulin-dependent protein kinase (CaM kinase) II [EC:2.7.11.17]
	Dopaminergic synapse
	sw13482	K00501	TH; tyrosine 3-monooxygenase [EC:1.14.16.2]
	sw17981	K05858	PLCB; phosphatidylinositol phospholipase C, beta [EC:3.1.4.11]
	sw03660	K04515	CAMK2; calcium/calmodulin-dependent protein kinase (CaM kinase) II [EC:2.7.11.17]
	sw21416	K03456	PPP2R1; protein phosphatase 2 (formerly 2A), regulatory subunit A
	Serotonergic synapse
	sw17981	K05858	PLCB; phosphatidylinositol phospholipase C, beta [EC:3.1.4.11]
	Long-term potentiation
	sw03660	K04515	CAMK2; calcium/calmodulin-dependent protein kinase (CaM kinase) II [EC:2.7.11.17]
	sw11934	K06268	PPP3R, CNB; protein phosphatase 3, regulatory subunit
	sw17981	K05858	PLCB; phosphatidylinositol phospholipase C, beta [EC:3.1.4.11]
	Long-term depression
	sw21416	K03456	PPP2R1; protein phosphatase 2 (formerly 2A), regulatory subunit A
	sw17981	K05858	PLCB; phosphatidylinositol phospholipase C, beta [EC:3.1.4.11]
	Retrograde endocannabinoid signaling
	sw17981	K05858	PLCB; phosphatidylinositol phospholipase C, beta [EC:3.1.4.11]
	Synaptic vesicle cycle
	sw22916	K02145	ATPeVA, ATP6A1; V-type H+-transporting ATPase subunit A [EC:3.6.3.14]
	sw00795	K02147	ATPeVB, ATP6B1; V-type H+-transporting ATPase subunit B [EC:3.6.3.14]
	sw14354	K02148	ATPeVC, ATP6C; V-type H+-transporting ATPase subunit C [EC:3.6.3.14]
	sw14793	K02150	ATPeVE, ATP6E; V-type H+-transporting ATPase subunit E [EC:3.6.3.14]
	sw13277	K02152	ATPeVG, ATP6G1; V-type H+-transporting ATPase subunit G [EC:3.6.3.14]
	sw04026	K02154	ATPeVI, ATP6N1A; V-type H+-transporting ATPase subunit I [EC:3.6.3.14]
	sw09128	K02154	ATPeVI, ATP6N1A; V-type H+-transporting ATPase subunit I [EC:3.6.3.14]
	sw09511	K02154	ATPeVI, ATP6N1A; V-type H+-transporting ATPase subunit I [EC:3.6.3.14]
	sw09888	K02146	ATPeVAC39, ATP6D; V-type H+-transporting ATPase subunit AC39 [EC:3.6.3.14]
	sw21938	K02144	ATPeV54kD; V-type H+-transporting ATPase 54 kD subunit [EC:3.6.3.14]
	sw07674	K02155	ATPeVPL, ATP6L; V-type H+-transporting ATPase 16kDa proteolipid subunit [EC:3.6.3.14]
	sw14397	K03661	ATPeVPF, ATP6F; V-type H+-transporting ATPase 21kDa proteolipid subunit [EC:3.6.3.14]
	Neurotrophin signaling pathway
	sw03660	K04515	CAMK2; calcium/calmodulin-dependent protein kinase (CaM kinase) II [EC:2.7.11.17]
Sensory system
	Phototransduction - fly
	sw17981	K05858	PLCB; phosphatidylinositol phospholipase C, beta [EC:3.1.4.11]
	sw19883	K13803	TRPL; transient-receptor-potential-like protein
	sw17388	K05692	ACTB_G1; actin beta/gamma 1
	sw21905	K05692	ACTB_G1; actin beta/gamma 1
	sw21906	K05692	ACTB_G1; actin beta/gamma 1
	sw22633	K05692	ACTB_G1; actin beta/gamma 1
	sw03660	K04515	CAMK2; calcium/calmodulin-dependent protein kinase (CaM kinase) II [EC:2.7.11.17]
	sw20210	K13807	RDGC; retinal degeneration C protein [EC:3.1.3.16]
	Olfactory transduction
	sw03660	K04515	CAMK2; calcium/calmodulin-dependent protein kinase (CaM kinase) II [EC:2.7.11.17]
Development
	Dorso-ventral axis formation
	sw22733	K02644	PHL; pole hole
	sw21738	K02174	BR-C; broad
	sw02115	K02360	ENC; a component of the cytoplasm (encore)
	Axon guidance
	sw11934	K06268	PPP3R, CNB; protein phosphatase 3, regulatory subunit
	sw03613	K05110	EPHB1, ELK, NET; Eph receptor B1 [EC:2.7.10.1]
	sw04646	K05765	CFL; cofilin
	sw18286	K05719	ITGB1; integrin beta 1
	Osteoclast differentiation
	sw11934	K06268	PPP3R, CNB; protein phosphatase 3, regulatory subunit
Environmental adaptation
	Circadian rhythm
	sw16374	K03362	FBXW1_11, BTRC, beta-TRCP; F-box and WD-40 domain protein 1/11
	Circadian entrainment
	sw03660	K04515	CAMK2; calcium/calmodulin-dependent protein kinase (CaM kinase) II [EC:2.7.11.17]
	sw17981	K05858	PLCB; phosphatidylinositol phospholipase C, beta [EC:3.1.4.11]
	Circadian rhythm - fly
	sw08031	K09057	HLF; hepatic leukemia factor
	Circadian rhythm - plant
	sw14759	K03115	CSNK2B; casein kinase II subunit beta
	Plant-pathogen interaction
	sw01668	K09487	HSP90B, TRA1; heat shock protein 90kDa beta
	sw09820	K09487	HSP90B, TRA1; heat shock protein 90kDa beta
Human Diseases
Cancers
	Pathways in cancer
	sw14620	K02157	AXIN1; axin 1
	sw21425	K00444	WNT5; wingless-type MMTV integration site family, member 5
	sw08684	K06237	COL4A; collagen, type IV, alpha
	sw17383	K06237	COL4A; collagen, type IV, alpha
	sw01258	K06240	LAMA3_5; laminin, alpha 3/5
	sw16006	K06240	LAMA3_5; laminin, alpha 3/5
	sw07873	K05636	LAMB1; laminin, beta 1
	sw11565	K05636	LAMB1; laminin, beta 1
	sw14147	K05635	LAMC1; laminin, gamma 1
	sw18286	K05719	ITGB1; integrin beta 1
	sw22890	K04725	XIAP, BIRC4; E3 ubiquitin-protein ligase XIAP
	sw16212	K11224	STAT5B; signal transducer and activator of transcription 5B
	sw13994	K09290	TPM3; tropomyosin 3
	sw13737	K09291	TPR; nucleoprotein TPR
	sw12339	K04453	MAX; Max protein
	sw17409	K04500	SMAD2_3; mothers against decapentaplegic homolog 2/3
	sw15120	K04496	CTBP; C-terminal binding protein
	sw15825	K08738	CYC; cytochrome c
	sw01653	K07299	SLC2A1, GLUT1; MFS transporter, SP family, solute carrier family 2 (facilitated glucose transporter), member 1
	sw00355	K04662	BMP2_4; bone morphogenetic protein 2/4
	sw01668	K09487	HSP90B, TRA1; heat shock protein 90kDa beta
	sw09820	K09487	HSP90B, TRA1; heat shock protein 90kDa beta
	Transcriptional misregulation in cancers
	sw11501	K15188	CCNT; cyclin T
	sw22670	K00069	HPGD; 15-hydroxyprostaglandin dehydrogenase (NAD) [EC:1.1.1.141]
	sw22687	K00069	HPGD; 15-hydroxyprostaglandin dehydrogenase (NAD) [EC:1.1.1.141]
	sw18960	K12823	DDX5, DBP2; ATP-dependent RNA helicase DDX5/DBP2 [EC:3.6.4.13]
	sw12339	K04453	MAX; Max protein
	sw11689	K13098	TLS, FUS; RNA-binding protein FUS
	Proteoglycans in cancer
	sw17388	K05692	ACTB_G1; actin beta/gamma 1
	sw21905	K05692	ACTB_G1; actin beta/gamma 1
	sw21906	K05692	ACTB_G1; actin beta/gamma 1
	sw22633	K05692	ACTB_G1; actin beta/gamma 1
	sw19762	K10380	ANK; ankyrin
	sw03660	K04515	CAMK2; calcium/calmodulin-dependent protein kinase (CaM kinase) II [EC:2.7.11.17]
	sw18960	K12823	DDX5, DBP2; ATP-dependent RNA helicase DDX5/DBP2 [EC:3.6.4.13]
	sw18286	K05719	ITGB1; integrin beta 1
	sw17435	K05760	PXN; paxillin
	sw21425	K00444	WNT5; wingless-type MMTV integration site family, member 5
	Chemical carcinogenesis
	sw02205	K00799	GST, gst; glutathione S-transferase [EC:2.5.1.18]
	sw15127	K00799	GST, gst; glutathione S-transferase [EC:2.5.1.18]
	sw13395	K00799	GST, gst; glutathione S-transferase [EC:2.5.1.18]
	sw15474	K00799	GST, gst; glutathione S-transferase [EC:2.5.1.18]
	sw13043	K00799	GST, gst; glutathione S-transferase [EC:2.5.1.18]
	sw01413	K04809	CHRNA7; nicotinic acetylcholine receptor alpha-7
	sw22710	K00699	UGT; glucuronosyltransferase [EC:2.4.1.17]
	sw19163	K00699	UGT; glucuronosyltransferase [EC:2.4.1.17]
	sw18729	K00699	UGT; glucuronosyltransferase [EC:2.4.1.17]
	sw06973	K00699	UGT; glucuronosyltransferase [EC:2.4.1.17]
	sw18911	K00129	E1.2.1.5; aldehyde dehydrogenase (NAD(P)+) [EC:1.2.1.5]
	sw10126	K00816	CCBL; kynurenine---oxoglutarate transaminase / cysteine-S-conjugate beta-lyase / glutamine---phenylpyruvate transaminase [EC:2.6.1.7 4.4.1.13 2.6.1.64]
	sw12156	K00816	CCBL; kynurenine---oxoglutarate transaminase / cysteine-S-conjugate beta-lyase / glutamine---phenylpyruvate transaminase [EC:2.6.1.7 4.4.1.13 2.6.1.64]
	sw18242	K00816	CCBL; kynurenine---oxoglutarate transaminase / cysteine-S-conjugate beta-lyase / glutamine---phenylpyruvate transaminase [EC:2.6.1.7 4.4.1.13 2.6.1.64]
	sw22405	K00816	CCBL; kynurenine---oxoglutarate transaminase / cysteine-S-conjugate beta-lyase / glutamine---phenylpyruvate transaminase [EC:2.6.1.7 4.4.1.13 2.6.1.64]
	sw22810	K00816	CCBL; kynurenine---oxoglutarate transaminase / cysteine-S-conjugate beta-lyase / glutamine---phenylpyruvate transaminase [EC:2.6.1.7 4.4.1.13 2.6.1.64]
	Viral carcinogenesis
	sw20360	K10610	DDB1; DNA damage-binding protein 1
	sw21948	K16197	YWHAB_Q_Z; 14-3-3 protein beta/theta/zeta
	sw16212	K11224	STAT5B; signal transducer and activator of transcription 5B
	sw09888	K02146	ATPeVAC39, ATP6D; V-type H+-transporting ATPase subunit AC39 [EC:3.6.3.14]
	sw17435	K05760	PXN; paxillin
	sw22892	K00873	PK, pyk; pyruvate kinase [EC:2.7.1.40]
	sw01574	K05768	GSN; gelsolin
	Colorectal cancer
	sw14620	K02157	AXIN1; axin 1
	sw17409	K04500	SMAD2_3; mothers against decapentaplegic homolog 2/3
	sw15825	K08738	CYC; cytochrome c
	Pancreatic cancer
	sw17409	K04500	SMAD2_3; mothers against decapentaplegic homolog 2/3
	Glioma
	sw03660	K04515	CAMK2; calcium/calmodulin-dependent protein kinase (CaM kinase) II [EC:2.7.11.17]
	Thyroid cancer
	sw13994	K09290	TPM3; tropomyosin 3
	sw13737	K09291	TPR; nucleoprotein TPR
	Acute myeloid leukemia
	sw16212	K11224	STAT5B; signal transducer and activator of transcription 5B
	Chronic myeloid leukemia
	sw16212	K11224	STAT5B; signal transducer and activator of transcription 5B
	sw15120	K04496	CTBP; C-terminal binding protein
	Basal cell carcinoma
	sw00355	K04662	BMP2_4; bone morphogenetic protein 2/4
	sw21425	K00444	WNT5; wingless-type MMTV integration site family, member 5
	sw14620	K02157	AXIN1; axin 1
	Renal cell carcinoma
	sw01653	K07299	SLC2A1, GLUT1; MFS transporter, SP family, solute carrier family 2 (facilitated glucose transporter), member 1
	Prostate cancer
	sw01668	K09487	HSP90B, TRA1; heat shock protein 90kDa beta
	sw09820	K09487	HSP90B, TRA1; heat shock protein 90kDa beta
	Endometrial cancer
	sw14620	K02157	AXIN1; axin 1
	Small cell lung cancer
	sw15825	K08738	CYC; cytochrome c
	sw12339	K04453	MAX; Max protein
	sw08684	K06237	COL4A; collagen, type IV, alpha
	sw17383	K06237	COL4A; collagen, type IV, alpha
	sw01258	K06240	LAMA3_5; laminin, alpha 3/5
	sw16006	K06240	LAMA3_5; laminin, alpha 3/5
	sw07873	K05636	LAMB1; laminin, beta 1
	sw11565	K05636	LAMB1; laminin, beta 1
	sw14147	K05635	LAMC1; laminin, gamma 1
	sw18286	K05719	ITGB1; integrin beta 1
	sw22890	K04725	XIAP, BIRC4; E3 ubiquitin-protein ligase XIAP
Immune diseases
	Rheumatoid arthritis
	sw22916	K02145	ATPeVA, ATP6A1; V-type H+-transporting ATPase subunit A [EC:3.6.3.14]
	sw00795	K02147	ATPeVB, ATP6B1; V-type H+-transporting ATPase subunit B [EC:3.6.3.14]
	sw14354	K02148	ATPeVC, ATP6C; V-type H+-transporting ATPase subunit C [EC:3.6.3.14]
	sw14793	K02150	ATPeVE, ATP6E; V-type H+-transporting ATPase subunit E [EC:3.6.3.14]
	sw13277	K02152	ATPeVG, ATP6G1; V-type H+-transporting ATPase subunit G [EC:3.6.3.14]
	sw04026	K02154	ATPeVI, ATP6N1A; V-type H+-transporting ATPase subunit I [EC:3.6.3.14]
	sw09128	K02154	ATPeVI, ATP6N1A; V-type H+-transporting ATPase subunit I [EC:3.6.3.14]
	sw09511	K02154	ATPeVI, ATP6N1A; V-type H+-transporting ATPase subunit I [EC:3.6.3.14]
	sw09888	K02146	ATPeVAC39, ATP6D; V-type H+-transporting ATPase subunit AC39 [EC:3.6.3.14]
	sw21938	K02144	ATPeV54kD; V-type H+-transporting ATPase 54 kD subunit [EC:3.6.3.14]
	sw07674	K02155	ATPeVPL, ATP6L; V-type H+-transporting ATPase 16kDa proteolipid subunit [EC:3.6.3.14]
	sw14397	K03661	ATPeVPF, ATP6F; V-type H+-transporting ATPase 21kDa proteolipid subunit [EC:3.6.3.14]
	Inflammatiory bowel disease (IBD)
	sw17409	K04500	SMAD2_3; mothers against decapentaplegic homolog 2/3
Neurodegenerative diseases
	Alzheimer's disease
	sw00373	K06704	ADAM10; disintegrin and metalloproteinase domain-containing protein 10 [EC:3.4.24.81]
	sw22896	K06171	NCSTN; nicastrin
	sw05999	K00234	SDHA, SDH1; succinate dehydrogenase (ubiquinone) flavoprotein subunit [EC:1.3.5.1]
	sw08124	K00237	SDHD, SDH4; succinate dehydrogenase (ubiquinone) membrane anchor subunit
	sw11934	K06268	PPP3R, CNB; protein phosphatase 3, regulatory subunit
	sw15825	K08738	CYC; cytochrome c
	sw17981	K05858	PLCB; phosphatidylinositol phospholipase C, beta [EC:3.1.4.11]
	sw02925	K04380	MAPT, TAU; microtubule-associated protein tau
	Parkinson's disease
	sw18662	K10575	UBE2G1, UBC7; ubiquitin-conjugating enzyme E2 G1 [EC:6.3.2.19]
	sw13482	K00501	TH; tyrosine 3-monooxygenase [EC:1.14.16.2]
	sw05999	K00234	SDHA, SDH1; succinate dehydrogenase (ubiquinone) flavoprotein subunit [EC:1.3.5.1]
	sw08124	K00237	SDHD, SDH4; succinate dehydrogenase (ubiquinone) membrane anchor subunit
	sw15825	K08738	CYC; cytochrome c
	Amyotrophic lateral sclerosis (ALS)
	sw11934	K06268	PPP3R, CNB; protein phosphatase 3, regulatory subunit
	sw15825	K08738	CYC; cytochrome c
	sw14555	K04565	SOD1; superoxide dismutase, Cu-Zn family [EC:1.15.1.1]
	sw01883	K11519	DERL1; Derlin-1
	sw03619	K03781	katE, CAT, catB, srpA; catalase [EC:1.11.1.6]
	Huntington's disease
	sw17981	K05858	PLCB; phosphatidylinositol phospholipase C, beta [EC:3.1.4.11]
	sw09626	K10426	DCTN4; dynactin 4
	sw02504	K10408	DNAH; dynein heavy chain, axonemal
	sw14555	K04565	SOD1; superoxide dismutase, Cu-Zn family [EC:1.15.1.1]
	sw05999	K00234	SDHA, SDH1; succinate dehydrogenase (ubiquinone) flavoprotein subunit [EC:1.3.5.1]
	sw08124	K00237	SDHD, SDH4; succinate dehydrogenase (ubiquinone) membrane anchor subunit
	sw15825	K08738	CYC; cytochrome c
	Prion diseases
	sw08198	K09490	HSPA5, BIP; heat shock 70kDa protein 5
	sw14147	K05635	LAMC1; laminin, gamma 1
	sw14555	K04565	SOD1; superoxide dismutase, Cu-Zn family [EC:1.15.1.1]
Substance dependence
	Cocaine addiction
	sw13482	K00501	TH; tyrosine 3-monooxygenase [EC:1.14.16.2]
	Amphetamine addiction
	sw13482	K00501	TH; tyrosine 3-monooxygenase [EC:1.14.16.2]
	sw03660	K04515	CAMK2; calcium/calmodulin-dependent protein kinase (CaM kinase) II [EC:2.7.11.17]
	sw11934	K06268	PPP3R, CNB; protein phosphatase 3, regulatory subunit
	Morphine addiction
	sw11493	K13755	PDE1; calcium/calmodulin-dependent 3',5'-cyclic nucleotide phosphodiesterase [EC:3.1.4.17]
	Nicotine addiction
	sw01413	K04809	CHRNA7; nicotinic acetylcholine receptor alpha-7
	Alcoholism
	sw13482	K00501	TH; tyrosine 3-monooxygenase [EC:1.14.16.2]
Cardiovascular diseases
	Hypertrophic cardiomyopathy (HCM)
	sw18286	K05719	ITGB1; integrin beta 1
	sw17388	K05692	ACTB_G1; actin beta/gamma 1
	sw21905	K05692	ACTB_G1; actin beta/gamma 1
	sw21906	K05692	ACTB_G1; actin beta/gamma 1
	sw22633	K05692	ACTB_G1; actin beta/gamma 1
	sw13994	K09290	TPM3; tropomyosin 3
	sw13995	K10375	TPM4; tropomyosin 4
	sw00643	K01283	E3.4.15.1, ACE; peptidyl-dipeptidase A [EC:3.4.15.1]
	Arrhythmogenic right ventricular cardiomyopathy (ARVC)
	sw18286	K05719	ITGB1; integrin beta 1
	sw17388	K05692	ACTB_G1; actin beta/gamma 1
	sw21905	K05692	ACTB_G1; actin beta/gamma 1
	sw21906	K05692	ACTB_G1; actin beta/gamma 1
	sw22633	K05692	ACTB_G1; actin beta/gamma 1
	Dilated cardiomyopathy (DCM)
	sw18286	K05719	ITGB1; integrin beta 1
	sw17388	K05692	ACTB_G1; actin beta/gamma 1
	sw21905	K05692	ACTB_G1; actin beta/gamma 1
	sw21906	K05692	ACTB_G1; actin beta/gamma 1
	sw22633	K05692	ACTB_G1; actin beta/gamma 1
	sw13994	K09290	TPM3; tropomyosin 3
	sw13995	K10375	TPM4; tropomyosin 4
	Viral myocarditis
	sw17388	K05692	ACTB_G1; actin beta/gamma 1
	sw21905	K05692	ACTB_G1; actin beta/gamma 1
	sw21906	K05692	ACTB_G1; actin beta/gamma 1
	sw22633	K05692	ACTB_G1; actin beta/gamma 1
	sw06901	K03260	EIF4G; translation initiation factor 4G
	sw15825	K08738	CYC; cytochrome c
	sw12898	K10352	MYH; myosin heavy chain
	sw12899	K10352	MYH; myosin heavy chain
Endocrine and metabolic diseases
	Type I diabetes mellitus
	Type II diabetes mellitus
	sw20525	K04527	INSR; insulin receptor [EC:2.7.10.1]
	sw22892	K00873	PK, pyk; pyruvate kinase [EC:2.7.1.40]
	Maturity onset diabetes of the young
Infectious diseases
	Vibrio cholerae infection
	sw22916	K02145	ATPeVA, ATP6A1; V-type H+-transporting ATPase subunit A [EC:3.6.3.14]
	sw00795	K02147	ATPeVB, ATP6B1; V-type H+-transporting ATPase subunit B [EC:3.6.3.14]
	sw14354	K02148	ATPeVC, ATP6C; V-type H+-transporting ATPase subunit C [EC:3.6.3.14]
	sw14793	K02150	ATPeVE, ATP6E; V-type H+-transporting ATPase subunit E [EC:3.6.3.14]
	sw13277	K02152	ATPeVG, ATP6G1; V-type H+-transporting ATPase subunit G [EC:3.6.3.14]
	sw04026	K02154	ATPeVI, ATP6N1A; V-type H+-transporting ATPase subunit I [EC:3.6.3.14]
	sw09128	K02154	ATPeVI, ATP6N1A; V-type H+-transporting ATPase subunit I [EC:3.6.3.14]
	sw09511	K02154	ATPeVI, ATP6N1A; V-type H+-transporting ATPase subunit I [EC:3.6.3.14]
	sw09888	K02146	ATPeVAC39, ATP6D; V-type H+-transporting ATPase subunit AC39 [EC:3.6.3.14]
	sw21938	K02144	ATPeV54kD; V-type H+-transporting ATPase 54 kD subunit [EC:3.6.3.14]
	sw07674	K02155	ATPeVPL, ATP6L; V-type H+-transporting ATPase 16kDa proteolipid subunit [EC:3.6.3.14]
	sw14397	K03661	ATPeVPF, ATP6F; V-type H+-transporting ATPase 21kDa proteolipid subunit [EC:3.6.3.14]
	sw13452	K10956	SEC61A; protein transport protein SEC61 subunit alpha
	sw07544	K07342	SEC61G, SSS1, secE; protein transport protein SEC61 subunit gamma and related proteins
	sw17388	K05692	ACTB_G1; actin beta/gamma 1
	sw21905	K05692	ACTB_G1; actin beta/gamma 1
	sw21906	K05692	ACTB_G1; actin beta/gamma 1
	sw22633	K05692	ACTB_G1; actin beta/gamma 1
	Epithelial cell signaling in Helicobacter pylori infection
	sw00373	K06704	ADAM10; disintegrin and metalloproteinase domain-containing protein 10 [EC:3.4.24.81]
	sw07692	K05728	CSK; c-src tyrosine kinase [EC:2.7.10.2]
	sw22916	K02145	ATPeVA, ATP6A1; V-type H+-transporting ATPase subunit A [EC:3.6.3.14]
	sw00795	K02147	ATPeVB, ATP6B1; V-type H+-transporting ATPase subunit B [EC:3.6.3.14]
	sw14354	K02148	ATPeVC, ATP6C; V-type H+-transporting ATPase subunit C [EC:3.6.3.14]
	sw14793	K02150	ATPeVE, ATP6E; V-type H+-transporting ATPase subunit E [EC:3.6.3.14]
	sw13277	K02152	ATPeVG, ATP6G1; V-type H+-transporting ATPase subunit G [EC:3.6.3.14]
	sw04026	K02154	ATPeVI, ATP6N1A; V-type H+-transporting ATPase subunit I [EC:3.6.3.14]
	sw09128	K02154	ATPeVI, ATP6N1A; V-type H+-transporting ATPase subunit I [EC:3.6.3.14]
	sw09511	K02154	ATPeVI, ATP6N1A; V-type H+-transporting ATPase subunit I [EC:3.6.3.14]
	sw09888	K02146	ATPeVAC39, ATP6D; V-type H+-transporting ATPase subunit AC39 [EC:3.6.3.14]
	sw21938	K02144	ATPeV54kD; V-type H+-transporting ATPase 54 kD subunit [EC:3.6.3.14]
	sw07674	K02155	ATPeVPL, ATP6L; V-type H+-transporting ATPase 16kDa proteolipid subunit [EC:3.6.3.14]
	sw14397	K03661	ATPeVPF, ATP6F; V-type H+-transporting ATPase 21kDa proteolipid subunit [EC:3.6.3.14]
	Pathogenic Escherichia coli infection
	sw21719	K07374	TUBA; tubulin alpha
	sw22939	K07374	TUBA; tubulin alpha
	sw17349	K07375	TUBB; tubulin beta
	sw17388	K05692	ACTB_G1; actin beta/gamma 1
	sw21905	K05692	ACTB_G1; actin beta/gamma 1
	sw21906	K05692	ACTB_G1; actin beta/gamma 1
	sw22633	K05692	ACTB_G1; actin beta/gamma 1
	sw18286	K05719	ITGB1; integrin beta 1
	Salmonella infection
	sw17388	K05692	ACTB_G1; actin beta/gamma 1
	sw21905	K05692	ACTB_G1; actin beta/gamma 1
	sw21906	K05692	ACTB_G1; actin beta/gamma 1
	sw22633	K05692	ACTB_G1; actin beta/gamma 1
	sw17388	K05692	ACTB_G1; actin beta/gamma 1
	sw21905	K05692	ACTB_G1; actin beta/gamma 1
	sw21906	K05692	ACTB_G1; actin beta/gamma 1
	sw22633	K05692	ACTB_G1; actin beta/gamma 1
	sw17388	K05692	ACTB_G1; actin beta/gamma 1
	sw21905	K05692	ACTB_G1; actin beta/gamma 1
	sw21906	K05692	ACTB_G1; actin beta/gamma 1
	sw22633	K05692	ACTB_G1; actin beta/gamma 1
	sw17388	K05692	ACTB_G1; actin beta/gamma 1
	sw21905	K05692	ACTB_G1; actin beta/gamma 1
	sw21906	K05692	ACTB_G1; actin beta/gamma 1
	sw22633	K05692	ACTB_G1; actin beta/gamma 1
	sw19848	K10415	DYNC1I, DNCI; dynein intermediate chain, cytosolic
	sw12681	K05759	PFN; profilin
	Shigellosis
	sw18286	K05719	ITGB1; integrin beta 1
	sw04649	K05700	VCL; vinculin
	sw17388	K05692	ACTB_G1; actin beta/gamma 1
	sw21905	K05692	ACTB_G1; actin beta/gamma 1
	sw21906	K05692	ACTB_G1; actin beta/gamma 1
	sw22633	K05692	ACTB_G1; actin beta/gamma 1
	sw12681	K05759	PFN; profilin
	sw16374	K03362	FBXW1_11, BTRC, beta-TRCP; F-box and WD-40 domain protein 1/11
	Pertussis
	sw18286	K05719	ITGB1; integrin beta 1
	sw04646	K05765	CFL; cofilin
	Legionellosis
	sw00464	K13525	VCP, CDC48; transitional endoplasmic reticulum ATPase
	sw07877	K13525	VCP, CDC48; transitional endoplasmic reticulum ATPase
	sw14915	K13525	VCP, CDC48; transitional endoplasmic reticulum ATPase
	sw15825	K08738	CYC; cytochrome c
	sw22585	K03283	HSPA1_8; heat shock 70kDa protein 1/8
	Tuberculosis
	sw15825	K08738	CYC; cytochrome c
	sw03660	K04515	CAMK2; calcium/calmodulin-dependent protein kinase (CaM kinase) II [EC:2.7.11.17]
	sw11819	K01379	CTSD; cathepsin D [EC:3.4.23.5]
	sw04026	K02154	ATPeVI, ATP6N1A; V-type H+-transporting ATPase subunit I [EC:3.6.3.14]
	sw09128	K02154	ATPeVI, ATP6N1A; V-type H+-transporting ATPase subunit I [EC:3.6.3.14]
	sw09511	K02154	ATPeVI, ATP6N1A; V-type H+-transporting ATPase subunit I [EC:3.6.3.14]
	sw09888	K02146	ATPeVAC39, ATP6D; V-type H+-transporting ATPase subunit AC39 [EC:3.6.3.14]
	sw21938	K02144	ATPeV54kD; V-type H+-transporting ATPase 54 kD subunit [EC:3.6.3.14]
	sw07674	K02155	ATPeVPL, ATP6L; V-type H+-transporting ATPase 16kDa proteolipid subunit [EC:3.6.3.14]
	sw14397	K03661	ATPeVPF, ATP6F; V-type H+-transporting ATPase 21kDa proteolipid subunit [EC:3.6.3.14]
	sw11934	K06268	PPP3R, CNB; protein phosphatase 3, regulatory subunit
	Bacterial invasion of epithelial cells
	sw17388	K05692	ACTB_G1; actin beta/gamma 1
	sw21905	K05692	ACTB_G1; actin beta/gamma 1
	sw21906	K05692	ACTB_G1; actin beta/gamma 1
	sw22633	K05692	ACTB_G1; actin beta/gamma 1
	sw17435	K05760	PXN; paxillin
	sw18286	K05719	ITGB1; integrin beta 1
	sw04649	K05700	VCL; vinculin
	HTLV-I infection
	sw01653	K07299	SLC2A1, GLUT1; MFS transporter, SP family, solute carrier family 2 (facilitated glucose transporter), member 1
	sw12517	K08057	CALR; calreticulin
	sw11934	K06268	PPP3R, CNB; protein phosphatase 3, regulatory subunit
	sw16212	K11224	STAT5B; signal transducer and activator of transcription 5B
	sw21425	K00444	WNT5; wingless-type MMTV integration site family, member 5
	sw22890	K04725	XIAP, BIRC4; E3 ubiquitin-protein ligase XIAP
	sw17409	K04500	SMAD2_3; mothers against decapentaplegic homolog 2/3
	Measles
	sw16212	K11224	STAT5B; signal transducer and activator of transcription 5B
	sw14759	K03115	CSNK2B; casein kinase II subunit beta
	sw22585	K03283	HSPA1_8; heat shock 70kDa protein 1/8
	Influenza A
	sw17977	K09523	DNAJC3; DnaJ homolog subfamily C member 3
	sw22585	K03283	HSPA1_8; heat shock 70kDa protein 1/8
	sw15825	K08738	CYC; cytochrome c
	sw17388	K05692	ACTB_G1; actin beta/gamma 1
	sw21905	K05692	ACTB_G1; actin beta/gamma 1
	sw21906	K05692	ACTB_G1; actin beta/gamma 1
	sw22633	K05692	ACTB_G1; actin beta/gamma 1
	Hepatitis B
	sw20360	K10610	DDB1; DNA damage-binding protein 1
	sw21948	K16197	YWHAB_Q_Z; 14-3-3 protein beta/theta/zeta
	sw15825	K08738	CYC; cytochrome c
	sw16212	K11224	STAT5B; signal transducer and activator of transcription 5B
	Hepatitis C
	sw21416	K03456	PPP2R1; protein phosphatase 2 (formerly 2A), regulatory subunit A
	Herpes simplex infection
	sw14759	K03115	CSNK2B; casein kinase II subunit beta
	sw15825	K08738	CYC; cytochrome c
	Epstein-Barr virus infection
	sw22585	K03283	HSPA1_8; heat shock 70kDa protein 1/8
	sw13175	K04455	HSPB1; heat shock protein beta-1
	sw21948	K16197	YWHAB_Q_Z; 14-3-3 protein beta/theta/zeta
	sw04021	K03028	PSMD2, RPN1; 26S proteasome regulatory subunit N1
	sw01587	K03032	PSMD1, RPN2; 26S proteasome regulatory subunit N2
	sw14759	K03115	CSNK2B; casein kinase II subunit beta
	Amoebiasis
	sw13175	K04455	HSPB1; heat shock protein beta-1
	sw08684	K06237	COL4A; collagen, type IV, alpha
	sw17383	K06237	COL4A; collagen, type IV, alpha
	sw01258	K06240	LAMA3_5; laminin, alpha 3/5
	sw16006	K06240	LAMA3_5; laminin, alpha 3/5
	sw07873	K05636	LAMB1; laminin, beta 1
	sw11565	K05636	LAMB1; laminin, beta 1
	sw14147	K05635	LAMC1; laminin, gamma 1
	sw17981	K05858	PLCB; phosphatidylinositol phospholipase C, beta [EC:3.1.4.11]
	sw04649	K05700	VCL; vinculin
	sw09544	K01476	E3.5.3.1, rocF, arg; arginase [EC:3.5.3.1]
	sw19598	K13963	SERPINB; serpin B
	sw06084	K13963	SERPINB; serpin B
	sw07087	K13963	SERPINB; serpin B
	Malaria
	sw15794	K04659	THBS2S; thrombospondin 2/3/4/5
	Toxoplasmosis
	sw22890	K04725	XIAP, BIRC4; E3 ubiquitin-protein ligase XIAP
	sw22585	K03283	HSPA1_8; heat shock 70kDa protein 1/8
	sw01258	K06240	LAMA3_5; laminin, alpha 3/5
	sw16006	K06240	LAMA3_5; laminin, alpha 3/5
	sw07873	K05636	LAMB1; laminin, beta 1
	sw11565	K05636	LAMB1; laminin, beta 1
	sw14147	K05635	LAMC1; laminin, gamma 1
	sw18286	K05719	ITGB1; integrin beta 1
	sw15825	K08738	CYC; cytochrome c
	Leishmaniasis
	sw18286	K05719	ITGB1; integrin beta 1
	Chagas disease (American trypanosomiasis)
	sw21416	K03456	PPP2R1; protein phosphatase 2 (formerly 2A), regulatory subunit A
	sw12517	K08057	CALR; calreticulin
	sw00643	K01283	E3.4.15.1, ACE; peptidyl-dipeptidase A [EC:3.4.15.1]
	sw17981	K05858	PLCB; phosphatidylinositol phospholipase C, beta [EC:3.1.4.11]
	sw19574	K01354	ptrB; oligopeptidase B [EC:3.4.21.83]
	sw17409	K04500	SMAD2_3; mothers against decapentaplegic homolog 2/3
	African trypanosomiasis
	sw19574	K01354	ptrB; oligopeptidase B [EC:3.4.21.83]
	sw17981	K05858	PLCB; phosphatidylinositol phospholipase C, beta [EC:3.1.4.11]
