# Supplementary material for: Microarray Analysis of the Juvenile Hormone Response in Larval Integument of the Silkworm, Bombyx mori
Source: Int J Genomics. 2014 Apr 6;2014:426025. doi: 10.1155/2014/426025 (PMC3997853; doi:10.1155/2014/426025)
Supplement: Supplementary file 1 — Supplementary Figure 1: Hierarchical clustering of a total of 8,670 genes expressed in the silkworm integument samples. A gene was considered to be expressed in a integument sample if its expression signal intensity was greater than 400 units. Supplementary Table 1: All real time RT-PCR primers used in this study. Supplementary Table 2: The list of 8,670 genes expressed in the silkworm integument samples. Integument-E: the integument sample treated with JHA methoprene. Integument-C: the integument sample treated with pure acetone. Supplementary Table 3: The list of 2,143 JHA-modulated genes with 2.0-fold expression change after JHA application. Supplementary Table 4: Correlation between microarray data and real time RT-PCR results. A good correlation was defined if the Pearson correlation coefficient (r) is greater than 0.7. Supplementary Table 5: All KEGG pathways that JHA-modulated genes were involved in. Supplementary Table 6: Coexpression classes of all JHA-modulated genes. Supplementary Table 7: JHA-induced genes that contain the binding motifs of Kr-h1 in their upstream UTR regions. Supplementary Table 8: JHA-modulated genes that are involved in each KEGG pathway. [file 426025.f1.zip › Supplementary materials/Table S6.xls]

## Sheet: ep-2.0-SOM-1_data
Table S6 Coexpression classes of JHA-modulated genes
Probe	Cluster
sw00628	0
sw02678	0
sw03545	0
sw03882	0
sw03888	0
sw06703	0
sw09227	0
sw10001	0
sw10912	0
sw11292	0
sw11354	0
sw11658	0
sw12337	0
sw13419	0
sw13737	0
sw13753	0
sw14912	0
sw15116	0
sw15134	0
sw16552	0
sw17712	0
sw17808	0
sw18181	0
sw19491	0
sw20215	0
BGIBMGA000691	1
sw00149	1
sw00689	1
sw01413	1
sw01574	1
sw01811	1
sw01872	1
sw02760	1
sw03198	1
sw03217	1
sw03270	1
sw03556	1
sw03915	1
sw04083	1
sw04154	1
sw05070	1
sw05452	1
sw05643	1
sw05842	1
sw05922	1
sw06416	1
sw06737	1
sw07068	1
sw07236	1
sw07685	1
sw07686	1
sw07860	1
sw07985	1
sw08074	1
sw08108	1
sw08156	1
sw08667	1
sw08684	1
sw08717	1
sw08783	1
sw08871	1
sw09024	1
sw09118	1
sw09154	1
sw09253	1
sw09421	1
sw09544	1
sw09946	1
sw10424	1
sw10501	1
sw10791	1
sw11056	1
sw11149	1
sw11201	1
sw11215	1
sw11374	1
sw11761	1
sw11835	1
sw12056	1
sw12244	1
sw12347	1
sw12600	1
sw12713	1
sw12780	1
sw12973	1
sw13094	1
sw13143	1
sw13174	1
sw13504	1
sw13846	1
sw14266	1
sw14331	1
sw14631	1
sw14709	1
sw14783	1
sw14813	1
sw14878	1
sw14895	1
sw15184	1
sw15269	1
sw15620	1
sw15791	1
sw15794	1
sw16392	1
sw16468	1
sw16650	1
sw16854	1
sw16993	1
sw17238	1
sw17492	1
sw17644	1
sw17690	1
sw17912	1
sw17949	1
sw18049	1
sw18447	1
sw18527	1
sw18931	1
sw19166	1
sw19295	1
sw19598	1
sw20130	1
sw20223	1
sw20657	1
sw20833	1
sw21084	1
sw21271	1
sw22077	1
sw22099	1
sw22129	1
sw22167	1
sw22212	1
sw22215	1
sw22273	1
sw22523	1
sw22607	1
sw22728	1
sw22787	1
sw22902	1
sw22915	1
sw22929	1
sw22966	1
sw00073	2
sw00110	2
sw00132	2
sw00305	2
sw00365	2
sw00382	2
sw00469	2
sw00539	2
sw00543	2
sw00643	2
sw00681	2
sw00887	2
sw01062	2
sw01082	2
sw01251	2
sw01389	2
sw01595	2
sw01649	2
sw01668	2
sw01712	2
sw01729	2
sw01791	2
sw01800	2
sw02154	2
sw02334	2
sw02576	2
sw02581	2
sw02992	2
sw03051	2
sw03150	2
sw03220	2
sw03241	2
sw03328	2
sw03490	2
sw03491	2
sw03546	2
sw03563	2
sw03572	2
sw03637	2
sw03684	2
sw03726	2
sw03770	2
sw04284	2
sw04515	2
sw04958	2
sw05025	2
sw05092	2
sw05345	2
sw05372	2
sw05629	2
sw05670	2
sw05700	2
sw05710	2
sw05928	2
sw05953	2
sw06000	2
sw06200	2
sw06702	2
sw06907	2
sw07252	2
sw07298	2
sw07530	2
sw07568	2
sw07609	2
sw07800	2
sw07873	2
sw07883	2
sw08198	2
sw08292	2
sw08293	2
sw08784	2
sw08815	2
sw08980	2
sw09022	2
sw09099	2
sw09158	2
sw09207	2
sw09222	2
sw09629	2
sw09712	2
sw09741	2
sw09808	2
sw09945	2
sw10101	2
sw10165	2
sw10564	2
sw10803	2
sw10865	2
sw10878	2
sw11000	2
sw11005	2
sw11055	2
sw11271	2
sw11275	2
sw11280	2
sw11495	2
sw11565	2
sw11637	2
sw11858	2
sw12086	2
sw12087	2
sw12138	2
sw12156	2
sw12197	2
sw12437	2
sw12493	2
sw12550	2
sw12672	2
sw12688	2
sw12759	2
sw12764	2
sw12797	2
sw12902	2
sw13032	2
sw13043	2
sw13171	2
sw13198	2
sw13224	2
sw13235	2
sw13471	2
sw13479	2
sw13636	2
sw13640	2
sw13658	2
sw13847	2
sw13999	2
sw14147	2
sw14151	2
sw14253	2
sw14294	2
sw14309	2
sw14312	2
sw14860	2
sw14898	2
sw14977	2
sw15089	2
sw15247	2
sw15248	2
sw15330	2
sw15372	2
sw15450	2
sw15509	2
sw15682	2
sw15762	2
sw15812	2
sw15906	2
sw15920	2
sw16006	2
sw16021	2
sw16035	2
sw16327	2
sw16358	2
sw16584	2
sw17168	2
sw17383	2
sw17415	2
sw17620	2
sw17661	2
sw17700	2
sw17822	2
sw17925	2
sw18004	2
sw18197	2
sw18275	2
sw18473	2
sw18510	2
sw18716	2
sw18769	2
sw18815	2
sw18899	2
sw18903	2
sw19031	2
sw19279	2
sw19440	2
sw19454	2
sw19662	2
sw19734	2
sw19777	2
sw19929	2
sw20092	2
sw20186	2
sw20204	2
sw20370	2
sw20472	2
sw20527	2
sw20533	2
sw20571	2
sw20585	2
sw20807	2
sw20814	2
sw20960	2
sw20980	2
sw21098	2
sw21299	2
sw21322	2
sw21678	2
sw21698	2
sw21738	2
sw21850	2
sw21899	2
sw22074	2
sw22290	2
sw22385	2
sw22571	2
sw22572	2
sw22618	2
sw22670	2
sw22676	2
sw22687	2
sw22886	2
sw22932	2
sw22961	2
sw22977	2
BGIBMGA000247	3
BGIBMGA011896	3
sw00177	3
sw00729	3
sw01790	3
sw02000	3
sw02143	3
sw03124	3
sw03428	3
sw04379	3
sw05458	3
sw06370	3
sw06658	3
sw07012	3
sw07028	3
sw07559	3
sw08173	3
sw09267	3
sw09380	3
sw09592	3
sw09747	3
sw11269	3
sw11409	3
sw11957	3
sw12224	3
sw15875	3
sw16057	3
sw16581	3
sw17365	3
sw17753	3
sw17886	3
sw18561	3
sw18999	3
sw19690	3
sw20315	3
sw20536	3
sw21022	3
sw21834	3
sw21842	3
sw22355	3
sw22782	3
sw09554	4
sw10573	4
sw11900	4
sw12330	4
sw13546	4
sw13905	4
sw13907	4
sw14859	4
sw16532	4
sw17532	4
sw17701	4
sw17863	4
sw18173	4
sw18644	4
sw19386	4
sw19551	4
sw20168	4
sw20455	4
sw21485	4
sw22793	4
sw22802	4
BGIBMGA000103	5
BGIBMGA011727	5
BGIBMGA012601	5
sw00076	5
sw00125	5
sw00214	5
sw00423	5
sw00556	5
sw00630	5
sw00653	5
sw00832	5
sw00863	5
sw01099	5
sw01118	5
sw01257	5
sw01281	5
sw01323	5
sw01367	5
sw01402	5
sw01405	5
sw01437	5
sw01438	5
sw01523	5
sw01636	5
sw01645	5
sw01658	5
sw02018	5
sw02121	5
sw02310	5
sw02532	5
sw02789	5
sw02946	5
sw03040	5
sw03048	5
sw03141	5
sw03143	5
sw03475	5
sw03494	5
sw03503	5
sw03539	5
sw03649	5
sw03670	5
sw03733	5
sw03877	5
sw03951	5
sw04021	5
sw04330	5
sw04359	5
sw04368	5
sw04475	5
sw04596	5
sw04646	5
sw04861	5
sw05170	5
sw05224	5
sw05661	5
sw05792	5
sw05844	5
sw05970	5
sw05989	5
sw06122	5
sw06248	5
sw06274	5
sw06577	5
sw06585	5
sw06810	5
sw06827	5
sw06828	5
sw06901	5
sw06928	5
sw07014	5
sw07055	5
sw07057	5
sw07093	5
sw07158	5
sw07320	5
sw07358	5
sw07431	5
sw07538	5
sw07625	5
sw07670	5
sw07734	5
sw07767	5
sw07855	5
sw07877	5
sw07878	5
sw07934	5
sw07995	5
sw08040	5
sw08062	5
sw08068	5
sw08328	5
sw08427	5
sw08444	5
sw08474	5
sw08485	5
sw08597	5
sw08791	5
sw08811	5
sw08916	5
sw08976	5
sw09042	5
sw09055	5
sw09155	5
sw09161	5
sw09342	5
sw09376	5
sw09626	5
sw09642	5
sw09766	5
sw09801	5
sw09817	5
sw10017	5
sw10164	5
sw10204	5
sw10322	5
sw10661	5
sw10671	5
sw10701	5
sw10773	5
sw11067	5
sw11085	5
sw11255	5
sw11372	5
sw11465	5
sw11655	5
sw11789	5
sw11942	5
sw12104	5
sw12115	5
sw12552	5
sw12555	5
sw12561	5
sw12568	5
sw12799	5
sw12898	5
sw12918	5
sw13037	5
sw13074	5
sw13114	5
sw13132	5
sw13187	5
sw13305	5
sw13316	5
sw13503	5
sw13622	5
sw13664	5
sw13871	5
sw13973	5
sw13989	5
sw14021	5
sw14039	5
sw14107	5
sw14162	5
sw14209	5
sw14216	5
sw14220	5
sw14222	5
sw14315	5
sw14399	5
sw14400	5
sw14444	5
sw14680	5
sw14683	5
sw14704	5
sw14804	5
sw14808	5
sw14847	5
sw14882	5
sw14915	5
sw15120	5
sw15125	5
sw15130	5
sw15185	5
sw15209	5
sw15253	5
sw15321	5
sw15395	5
sw15426	5
sw15479	5
sw15481	5
sw15703	5
sw15839	5
sw15971	5
sw15973	5
sw16188	5
sw16269	5
sw16328	5
sw16374	5
sw16520	5
sw16597	5
sw16608	5
sw16753	5
sw16783	5
sw16812	5
sw16908	5
sw17349	5
sw17382	5
sw17388	5
sw17409	5
sw17420	5
sw17421	5
sw17440	5
sw17508	5
sw17528	5
sw17551	5
sw17612	5
sw17635	5
sw17684	5
sw17724	5
sw17805	5
sw17894	5
sw18015	5
sw18052	5
sw18086	5
sw18141	5
sw18185	5
sw18271	5
sw18279	5
sw18342	5
sw18347	5
sw18355	5
sw18369	5
sw18633	5
sw18686	5
sw18789	5
sw18911	5
sw18917	5
sw18954	5
sw18957	5
sw19113	5
sw19163	5
sw19164	5
sw19182	5
sw19259	5
sw19262	5
sw19321	5
sw19436	5
sw19475	5
sw19574	5
sw19731	5
sw19763	5
sw19793	5
sw19806	5
sw19837	5
sw19848	5
sw19900	5
sw19971	5
sw19986	5
sw20224	5
sw20287	5
sw20331	5
sw20367	5
sw20440	5
sw20505	5
sw20730	5
sw20738	5
sw20810	5
sw20817	5
sw20825	5
sw20849	5
sw20901	5
sw20904	5
sw20932	5
sw20948	5
sw21009	5
sw21073	5
sw21115	5
sw21125	5
sw21135	5
sw21197	5
sw21277	5
sw21301	5
sw21352	5
sw21369	5
sw21376	5
sw21416	5
sw21516	5
sw21526	5
sw21674	5
sw21719	5
sw21791	5
sw21880	5
sw21891	5
sw21896	5
sw21905	5
sw21906	5
sw21907	5
sw21940	5
sw21941	5
sw22032	5
sw22045	5
sw22075	5
sw22190	5
sw22202	5
sw22254	5
sw22339	5
sw22365	5
sw22447	5
sw22463	5
sw22465	5
sw22487	5
sw22493	5
sw22526	5
sw22555	5
sw22573	5
sw22633	5
sw22652	5
sw22667	5
sw22675	5
sw22720	5
sw22744	5
sw22767	5
sw22775	5
sw22798	5
sw22831	5
sw22869	5
sw22939	5
sw22955	5
sw22971	5
BGIBMGA002724	6
sw00036	6
sw00037	6
sw00210	6
sw00304	6
sw00306	6
sw00373	6
sw00400	6
sw00454	6
sw00457	6
sw00464	6
sw00502	6
sw00579	6
sw00591	6
sw00605	6
sw00611	6
sw00648	6
sw00652	6
sw00734	6
sw00748	6
sw00778	6
sw00791	6
sw00813	6
sw00907	6
sw00949	6
sw00993	6
sw01068	6
sw01193	6
sw01258	6
sw01260	6
sw01471	6
sw01504	6
sw01583	6
sw01587	6
sw01617	6
sw01653	6
sw01720	6
sw01725	6
sw01727	6
sw01851	6
sw01883	6
sw01949	6
sw01958	6
sw02073	6
sw02089	6
sw02115	6
sw02304	6
sw02309	6
sw02561	6
sw02618	6
sw02870	6
sw02884	6
sw02892	6
sw02904	6
sw02948	6
sw03099	6
sw03109	6
sw03110	6
sw03119	6
sw03153	6
sw03192	6
sw03204	6
sw03233	6
sw03364	6
sw03391	6
sw03436	6
sw03522	6
sw03575	6
sw03612	6
sw03619	6
sw03654	6
sw03679	6
sw03697	6
sw03729	6
sw03754	6
sw03872	6
sw03925	6
sw03954	6
sw04028	6
sw04052	6
sw04054	6
sw04192	6
sw04203	6
sw04237	6
sw04353	6
sw04364	6
sw04377	6
sw04396	6
sw04417	6
sw04425	6
sw04448	6
sw04517	6
sw04565	6
sw04575	6
sw04795	6
sw04910	6
sw05029	6
sw05099	6
sw05100	6
sw05172	6
sw05230	6
sw05281	6
sw05363	6
sw05478	6
sw05641	6
sw05671	6
sw05701	6
sw05730	6
sw05812	6
sw05837	6
sw06011	6
sw06048	6
sw06076	6
sw06084	6
sw06088	6
sw06096	6
sw06291	6
sw06322	6
sw06329	6
sw06507	6
sw06572	6
sw06580	6
sw06587	6
sw06667	6
sw06670	6
sw06691	6
sw06835	6
sw06862	6
sw06916	6
sw06932	6
sw06984	6
sw07087	6
sw07091	6
sw07103	6
sw07108	6
sw07307	6
sw07317	6
sw07324	6
sw07326	6
sw07356	6
sw07443	6
sw07544	6
sw07563	6
sw07709	6
sw07738	6
sw07753	6
sw07845	6
sw07846	6
sw07856	6
sw07859	6
sw07919	6
sw07925	6
sw07943	6
sw07948	6
sw07956	6
sw08025	6
sw08029	6
sw08052	6
sw08073	6
sw08146	6
sw08162	6
sw08189	6
sw08241	6
sw08270	6
sw08373	6
sw08383	6
sw08406	6
sw08430	6
sw08446	6
sw08456	6
sw08471	6
sw08563	6
sw08594	6
sw08612	6
sw08616	6
sw08623	6
sw08652	6
sw08669	6
sw08678	6
sw08767	6
sw08833	6
sw08870	6
sw08972	6
sw09038	6
sw09048	6
sw09129	6
sw09186	6
sw09265	6
sw09286	6
sw09307	6
sw09354	6
sw09389	6
sw09405	6
sw09424	6
sw09441	6
sw09447	6
sw09449	6
sw09451	6
sw09480	6
sw09564	6
sw09645	6
sw09662	6
sw09674	6
sw09696	6
sw09735	6
sw09738	6
sw09776	6
sw09820	6
sw09857	6
sw09862	6
sw09911	6
sw09997	6
sw10064	6
sw10102	6
sw10126	6
sw10272	6
sw10294	6
sw10332	6
sw10358	6
sw10558	6
sw10674	6
sw10693	6
sw10762	6
sw10815	6
sw10891	6
sw10893	6
sw10976	6
sw10979	6
sw10980	6
sw11030	6
sw11074	6
sw11139	6
sw11152	6
sw11414	6
sw11493	6
sw11587	6
sw11604	6
sw11617	6
sw11619	6
sw11624	6
sw11625	6
sw11659	6
sw11740	6
sw11744	6
sw11748	6
sw11765	6
sw11819	6
sw11824	6
sw11883	6
sw11887	6
sw11925	6
sw11934	6
sw11946	6
sw12103	6
sw12117	6
sw12146	6
sw12183	6
sw12265	6
sw12271	6
sw12315	6
sw12335	6
sw12422	6
sw12447	6
sw12517	6
sw12528	6
sw12615	6
sw12646	6
sw12783	6
sw12823	6
sw12868	6
sw12871	6
sw12946	6
sw12948	6
sw13026	6
sw13075	6
sw13175	6
sw13255	6
sw13341	6
sw13395	6
sw13402	6
sw13446	6
sw13452	6
sw13534	6
sw13623	6
sw13648	6
sw13690	6
sw13786	6
sw13805	6
sw13879	6
sw13964	6
sw14040	6
sw14063	6
sw14074	6
sw14094	6
sw14113	6
sw14127	6
sw14136	6
sw14161	6
sw14169	6
sw14196	6
sw14215	6
sw14228	6
sw14229	6
sw14330	6
sw14420	6
sw14438	6
sw14440	6
sw14453	6
sw14467	6
sw14489	6
sw14507	6
sw14543	6
sw14545	6
sw14637	6
sw14648	6
sw14699	6
sw14703	6
sw14881	6
sw14933	6
sw14978	6
sw15024	6
sw15222	6
sw15296	6
sw15346	6
sw15385	6
sw15412	6
sw15436	6
sw15475	6
sw15492	6
sw15513	6
sw15643	6
sw15654	6
sw15684	6
sw15711	6
sw15724	6
sw15752	6
sw15793	6
sw15867	6
sw16010	6
sw16039	6
sw16055	6
sw16074	6
sw16159	6
sw16160	6
sw16181	6
sw16184	6
sw16279	6
sw16476	6
sw16519	6
sw16524	6
sw16601	6
sw16738	6
sw16814	6
sw16815	6
sw16829	6
sw16868	6
sw17049	6
sw17059	6
sw17071	6
sw17189	6
sw17216	6
sw17297	6
sw17321	6
sw17399	6
sw17432	6
sw17679	6
sw17680	6
sw17713	6
sw17818	6
sw17859	6
sw17865	6
sw17977	6
sw18024	6
sw18030	6
sw18135	6
sw18143	6
sw18188	6
sw18206	6
sw18242	6
sw18269	6
sw18291	6
sw18306	6
sw18367	6
sw18390	6
sw18395	6
sw18407	6
sw18472	6
sw18478	6
sw18497	6
sw18525	6
sw18593	6
sw18597	6
sw18630	6
sw18642	6
sw18735	6
sw18740	6
sw18743	6
sw18755	6
sw18777	6
sw18817	6
sw18965	6
sw18973	6
sw18987	6
sw18991	6
sw19096	6
sw19274	6
sw19360	6
sw19378	6
sw19519	6
sw19567	6
sw19580	6
sw19611	6
sw19691	6
sw19717	6
sw19810	6
sw19838	6
sw19860	6
sw19862	6
sw19990	6
sw19998	6
sw20001	6
sw20123	6
sw20131	6
sw20163	6
sw20167	6
sw20201	6
sw20207	6
sw20230	6
sw20231	6
sw20314	6
sw20338	6
sw20340	6
sw20360	6
sw20413	6
sw20415	6
sw20429	6
sw20459	6
sw20460	6
sw20464	6
sw20508	6
sw20520	6
sw20525	6
sw20526	6
sw20548	6
sw20550	6
sw20566	6
sw20712	6
sw20784	6
sw20836	6
sw20864	6
sw20866	6
sw20915	6
sw20967	6
sw20987	6
sw20997	6
sw21035	6
sw21062	6
sw21090	6
sw21150	6
sw21168	6
sw21652	6
sw21709	6
sw21718	6
sw21759	6
sw21913	6
sw21921	6
sw21956	6
sw22015	6
sw22021	6
sw22043	6
sw22291	6
sw22325	6
sw22358	6
sw22405	6
sw22413	6
sw22710	6
sw22745	6
sw22768	6
sw22810	6
sw22863	6
sw22892	6
sw22896	6
sw22900	6
sw22903	6
sw22911	6
sw22938	6
sw22959	6
sw22960	6
sw22973	6
BGIBMGA000249	7
BGIBMGA000277	7
BGIBMGA000278	7
BGIBMGA000338	7
BGIBMGA000341	7
BGIBMGA000662	7
BGIBMGA002561	7
BGIBMGA002566	7
BGIBMGA002567	7
BGIBMGA002770	7
BGIBMGA003061	7
BGIBMGA005277	7
BGIBMGA006796	7
BGIBMGA008245	7
BGIBMGA008262	7
BGIBMGA010654	7
BGIBMGA011560	7
BGIBMGA011715	7
BGIBMGA011716	7
BGIBMGA011717	7
BGIBMGA011763	7
BGIBMGA011766	7
BGIBMGA011769	7
BGIBMGA012594	7
Bm_nscaf2964_132	7
sw00003	7
sw00062	7
sw00085	7
sw00098	7
sw00118	7
sw00137	7
sw00139	7
sw00148	7
sw00203	7
sw00288	7
sw00299	7
sw00348	7
sw00355	7
sw00358	7
sw00359	7
sw00360	7
sw00403	7
sw00442	7
sw00474	7
sw00506	7
sw00529	7
sw00553	7
sw00571	7
sw00593	7
sw00595	7
sw00656	7
sw00728	7
sw00733	7
sw00738	7
sw00745	7
sw00753	7
sw00795	7
sw00796	7
sw00810	7
sw00812	7
sw00843	7
sw00854	7
sw00871	7
sw00885	7
sw00897	7
sw00900	7
sw00920	7
sw00947	7
sw00948	7
sw00954	7
sw01032	7
sw01084	7
sw01095	7
sw01096	7
sw01103	7
sw01139	7
sw01148	7
sw01149	7
sw01150	7
sw01185	7
sw01201	7
sw01216	7
sw01265	7
sw01285	7
sw01325	7
sw01333	7
sw01358	7
sw01391	7
sw01418	7
sw01422	7
sw01429	7
sw01465	7
sw01486	7
sw01551	7
sw01567	7
sw01585	7
sw01589	7
sw01592	7
sw01600	7
sw01650	7
sw01672	7
sw01726	7
sw01836	7
sw01907	7
sw01916	7
sw01945	7
sw01970	7
sw01978	7
sw01999	7
sw02005	7
sw02015	7
sw02022	7
sw02046	7
sw02108	7
sw02176	7
sw02205	7
sw02212	7
sw02232	7
sw02258	7
sw02311	7
sw02335	7
sw02345	7
sw02400	7
sw02402	7
sw02429	7
sw02437	7
sw02484	7
sw02504	7
sw02524	7
sw02528	7
sw02697	7
sw02703	7
sw02887	7
sw02925	7
sw02934	7
sw02976	7
sw02977	7
sw03021	7
sw03075	7
sw03101	7
sw03160	7
sw03230	7
sw03237	7
sw03275	7
sw03301	7
sw03337	7
sw03353	7
sw03370	7
sw03408	7
sw03416	7
sw03466	7
sw03548	7
sw03549	7
sw03580	7
sw03610	7
sw03613	7
sw03641	7
sw03659	7
sw03660	7
sw03711	7
sw03714	7
sw03742	7
sw03779	7
sw03784	7
sw03787	7
sw03802	7
sw03805	7
sw03837	7
sw03906	7
sw03927	7
sw03933	7
sw03949	7
sw03959	7
sw04023	7
sw04026	7
sw04041	7
sw04136	7
sw04137	7
sw04148	7
sw04152	7
sw04166	7
sw04222	7
sw04252	7
sw04254	7
sw04259	7
sw04271	7
sw04276	7
sw04333	7
sw04341	7
sw04343	7
sw04349	7
sw04363	7
sw04387	7
sw04397	7
sw04398	7
sw04412	7
sw04561	7
sw04645	7
sw04649	7
sw04840	7
sw04986	7
sw05002	7
sw05083	7
sw05084	7
sw05107	7
sw05120	7
sw05198	7
sw05204	7
sw05206	7
sw05302	7
sw05311	7
sw05314	7
sw05378	7
sw05447	7
sw05492	7
sw05528	7
sw05534	7
sw05547	7
sw05556	7
sw05615	7
sw05622	7
sw05634	7
sw05642	7
sw05663	7
sw05732	7
sw05736	7
sw05773	7
sw05815	7
sw05879	7
sw05889	7
sw05947	7
sw05969	7
sw05973	7
sw05999	7
sw06067	7
sw06079	7
sw06080	7
sw06085	7
sw06237	7
sw06242	7
sw06251	7
sw06276	7
sw06288	7
sw06348	7
sw06350	7
sw06372	7
sw06402	7
sw06407	7
sw06412	7
sw06424	7
sw06436	7
sw06482	7
sw06498	7
sw06503	7
sw06519	7
sw06554	7
sw06569	7
sw06604	7
sw06613	7
sw06616	7
sw06717	7
sw06735	7
sw06745	7
sw06748	7
sw06755	7
sw06771	7
sw06796	7
sw06847	7
sw06858	7
sw06883	7
sw06966	7
sw06973	7
sw07008	7
sw07050	7
sw07052	7
sw07086	7
sw07096	7
sw07211	7
sw07261	7
sw07281	7
sw07310	7
sw07399	7
sw07418	7
sw07423	7
sw07487	7
sw07534	7
sw07543	7
sw07589	7
sw07607	7
sw07617	7
sw07618	7
sw07651	7
sw07674	7
sw07691	7
sw07692	7
sw07693	7
sw07744	7
sw07752	7
sw07761	7
sw07781	7
sw07782	7
sw07794	7
sw07820	7
sw07851	7
sw07863	7
sw07901	7
sw07941	7
sw07942	7
sw08031	7
sw08044	7
sw08049	7
sw08076	7
sw08094	7
sw08106	7
sw08124	7
sw08145	7
sw08171	7
sw08192	7
sw08321	7
sw08326	7
sw08348	7
sw08350	7
sw08388	7
sw08417	7
sw08442	7
sw08457	7
sw08480	7
sw08487	7
sw08530	7
sw08544	7
sw08546	7
sw08547	7
sw08564	7
sw08565	7
sw08572	7
sw08576	7
sw08614	7
sw08626	7
sw08642	7
sw08657	7
sw08660	7
sw08702	7
sw08708	7
sw08718	7
sw08745	7
sw08802	7
sw08818	7
sw08830	7
sw08844	7
sw08853	7
sw08905	7
sw08911	7
sw09000	7
sw09049	7
sw09054	7
sw09066	7
sw09094	7
sw09103	7
sw09126	7
sw09128	7
sw09134	7
sw09160	7
sw09221	7
sw09254	7
sw09269	7
sw09452	7
sw09475	7
sw09481	7
sw09506	7
sw09511	7
sw09519	7
sw09522	7
sw09635	7
sw09640	7
sw09644	7
sw09759	7
sw09799	7
sw09821	7
sw09826	7
sw09830	7
sw09877	7
sw09888	7
sw09891	7
sw09895	7
sw09914	7
sw09969	7
sw10033	7
sw10047	7
sw10136	7
sw10163	7
sw10172	7
sw10234	7
sw10248	7
sw10301	7
sw10398	7
sw10434	7
sw10509	7
sw10574	7
sw10579	7
sw10624	7
sw10633	7
sw10636	7
sw10647	7
sw10704	7
sw10744	7
sw10753	7
sw10755	7
sw10758	7
sw10772	7
sw10795	7
sw10798	7
sw10805	7
sw10814	7
sw10845	7
sw10848	7
sw10854	7
sw10866	7
sw10888	7
sw10890	7
sw10922	7
sw10936	7
sw10937	7
sw10949	7
sw10994	7
sw11016	7
sw11035	7
sw11040	7
sw11084	7
sw11109	7
sw11115	7
sw11116	7
sw11128	7
sw11132	7
sw11150	7
sw11153	7
sw11164	7
sw11189	7
sw11198	7
sw11237	7
sw11257	7
sw11268	7
sw11317	7
sw11332	7
sw11342	7
sw11348	7
sw11404	7
sw11415	7
sw11425	7
sw11481	7
sw11501	7
sw11509	7
sw11511	7
sw11540	7
sw11576	7
sw11582	7
sw11643	7
sw11689	7
sw11692	7
sw11729	7
sw11732	7
sw11733	7
sw11781	7
sw11800	7
sw11832	7
sw11846	7
sw11860	7
sw11879	7
sw11888	7
sw11902	7
sw11963	7
sw11964	7
sw11966	7
sw11981	7
sw11982	7
sw11999	7
sw12011	7
sw12023	7
sw12154	7
sw12171	7
sw12174	7
sw12205	7
sw12206	7
sw12248	7
sw12263	7
sw12282	7
sw12338	7
sw12339	7
sw12355	7
sw12394	7
sw12404	7
sw12457	7
sw12479	7
sw12504	7
sw12516	7
sw12526	7
sw12530	7
sw12532	7
sw12534	7
sw12577	7
sw12606	7
sw12613	7
sw12651	7
sw12656	7
sw12681	7
sw12689	7
sw12736	7
sw12756	7
sw12852	7
sw12874	7
sw12879	7
sw12899	7
sw12912	7
sw12917	7
sw12919	7
sw12936	7
sw12945	7
sw13002	7
sw13044	7
sw13071	7
sw13072	7
sw13084	7
sw13107	7
sw13123	7
sw13134	7
sw13163	7
sw13179	7
sw13192	7
sw13208	7
sw13219	7
sw13226	7
sw13231	7
sw13270	7
sw13277	7
sw13296	7
sw13350	7
sw13351	7
sw13371	7
sw13391	7
sw13392	7
sw13400	7
sw13451	7
sw13473	7
sw13477	7
sw13482	7
sw13499	7
sw13559	7
sw13647	7
sw13656	7
sw13698	7
sw13733	7
sw13738	7
sw13865	7
sw13888	7
sw13889	7
sw13891	7
sw13897	7
sw13900	7
sw13903	7
sw13950	7
sw13985	7
sw13994	7
sw13995	7
sw14005	7
sw14028	7
sw14050	7
sw14071	7
sw14090	7
sw14108	7
sw14145	7
sw14252	7
sw14255	7
sw14293	7
sw14298	7
sw14310	7
sw14311	7
sw14354	7
sw14397	7
sw14431	7
sw14516	7
sw14555	7
sw14604	7
sw14619	7
sw14620	7
sw14624	7
sw14628	7
sw14629	7
sw14659	7
sw14697	7
sw14711	7
sw14740	7
sw14742	7
sw14753	7
sw14759	7
sw14766	7
sw14771	7
sw14775	7
sw14791	7
sw14793	7
sw14857	7
sw14879	7
sw14883	7
sw14909	7
sw14913	7
sw14929	7
sw14949	7
sw14951	7
sw15045	7
sw15095	7
sw15096	7
sw15098	7
sw15127	7
sw15150	7
sw15174	7
sw15202	7
sw15238	7
sw15289	7
sw15294	7
sw15353	7
sw15396	7
sw15429	7
sw15432	7
sw15439	7
sw15474	7
sw15491	7
sw15503	7
sw15506	7
sw15534	7
sw15536	7
sw15541	7
sw15564	7
sw15614	7
sw15650	7
sw15663	7
sw15681	7
sw15689	7
sw15691	7
sw15712	7
sw15765	7
sw15775	7
sw15803	7
sw15810	7
sw15825	7
sw15833	7
sw15836	7
sw15879	7
sw15882	7
sw15885	7
sw15892	7
sw16061	7
sw16085	7
sw16168	7
sw16187	7
sw16212	7
sw16250	7
sw16254	7
sw16272	7
sw16275	7
sw16281	7
sw16330	7
sw16356	7
sw16379	7
sw16412	7
sw16465	7
sw16484	7
sw16494	7
sw16530	7
sw16576	7
sw16610	7
sw16623	7
sw16642	7
sw16655	7
sw16724	7
sw16729	7
sw16750	7
sw16813	7
sw16922	7
sw16933	7
sw17020	7
sw17097	7
sw17141	7
sw17143	7
sw17173	7
sw17350	7
sw17363	7
sw17366	7
sw17369	7
sw17419	7
sw17435	7
sw17493	7
sw17507	7
sw17530	7
sw17552	7
sw17578	7
sw17602	7
sw17614	7
sw17622	7
sw17681	7
sw17705	7
sw17708	7
sw17727	7
sw17734	7
sw17751	7
sw17768	7
sw17771	7
sw17921	7
sw17943	7
sw17945	7
sw17947	7
sw17972	7
sw17981	7
sw17998	7
sw18010	7
sw18011	7
sw18023	7
sw18076	7
sw18096	7
sw18130	7
sw18154	7
sw18249	7
sw18252	7
sw18286	7
sw18333	7
sw18388	7
sw18404	7
sw18577	7
sw18578	7
sw18618	7
sw18625	7
sw18643	7
sw18658	7
sw18662	7
sw18675	7
sw18700	7
sw18714	7
sw18724	7
sw18729	7
sw18747	7
sw18759	7
sw18780	7
sw18786	7
sw18792	7
sw18806	7
sw18813	7
sw18858	7
sw18864	7
sw18870	7
sw18898	7
sw18919	7
sw18938	7
sw18960	7
sw19017	7
sw19018	7
sw19034	7
sw19049	7
sw19050	7
sw19089	7
sw19142	7
sw19212	7
sw19244	7
sw19248	7
sw19273	7
sw19357	7
sw19372	7
sw19373	7
sw19396	7
sw19400	7
sw19424	7
sw19460	7
sw19483	7
sw19509	7
sw19513	7
sw19526	7
[truncated: 145 more rows]
