# Supplementary material for: Microarray Analysis of the Juvenile Hormone Response in Larval Integument of the Silkworm, Bombyx mori
Source: Int J Genomics. 2014 Apr 6;2014:426025. doi: 10.1155/2014/426025 (PMC3997853; doi:10.1155/2014/426025)
Supplement: Supplementary file 1 — Supplementary Figure 1: Hierarchical clustering of a total of 8,670 genes expressed in the silkworm integument samples. A gene was considered to be expressed in a integument sample if its expression signal intensity was greater than 400 units. Supplementary Table 1: All real time RT-PCR primers used in this study. Supplementary Table 2: The list of 8,670 genes expressed in the silkworm integument samples. Integument-E: the integument sample treated with JHA methoprene. Integument-C: the integument sample treated with pure acetone. Supplementary Table 3: The list of 2,143 JHA-modulated genes with 2.0-fold expression change after JHA application. Supplementary Table 4: Correlation between microarray data and real time RT-PCR results. A good correlation was defined if the Pearson correlation coefficient (r) is greater than 0.7. Supplementary Table 5: All KEGG pathways that JHA-modulated genes were involved in. Supplementary Table 6: Coexpression classes of all JHA-modulated genes. Supplementary Table 7: JHA-induced genes that contain the binding motifs of Kr-h1 in their upstream UTR regions. Supplementary Table 8: JHA-modulated genes that are involved in each KEGG pathway. [file 426025.f1.zip › Supplementary materials/Table S7.xls]

## Sheet: Sheet1
Table S7 JHA-induced genes containing the binding motifs of Kr-h1 in their upstream UTR regions
Probe	SilkDB ID	Opt.	Start position	End position	Anchor position	Core sim.	Matrix sim.	Mat. sim. - opt.	Sequence	Probe Annotation
sw12561	BGIBMGA000054-PA	0.9	216	226	221	1	0.918	0.018	aatGGGTacct	gi|55242633|gb|EAA07387.2| ENSANGP00000000807 [Anopheles gambiae str. PEST] ENSANGP00000000807 [Anopheles gambiae str. PEST]
	BGIBMGA000054-PA	0.88	1731	1741	1736	0.818	0.899	0.019	agcGGTTtagc
	BGIBMGA000054-PA	0.9	2352	2362	2357	1	0.946	0.046	aatGGGTgaaa
	BGIBMGA000054-PA	0.88	2540	2550	2545	0.818	0.908	0.028	aaaGGCTtatt
sw09154	BGIBMGA000068-PA	0.88	2019	2029	2024	1	0.911	0.031	accGGGTtgct	gi|68192722|gb|EAN07375.1| Glucose-methanol-choline oxidoreductase:GMC oxidoreductase [Mesorhizobium sp. BNC1] Glucose-methanol-choline oxidoreductase:GMC oxidoreductase [Mesorhizobium sp. BNC1]
sw09154	BGIBMGA000068-PA	0.88	2250	2260	2255	1	0.897	0.017	accGGGTtctg
sw16532	BGIBMGA000158-PA	0.9	1987	1997	1992	1	0.953	0.053	aaaGGGTgtcc	gi|72019779|ref|XP_792493.1| PREDICTED: similar to choline dehydrogenase precursor [Strongylocentrotus purpuratus]
	BGIBMGA000158-PA	0.88	2072	2082	2077	0.818	0.89	0.01	agtGGTTtagt
	BGIBMGA000158-PA	0.88	2145	2155	2150	0.818	0.908	0.028	aaaGGTTtatg
sw22802	BGIBMGA000239-PA	0.88	237	247	242	0.818	0.928	0.048	aatGGCTtaac
	BGIBMGA000239-PA	0.88	2905	2915	2910	0.909	0.94	0.06	aaaGGATtaaa
sw22842	BGIBMGA000274-PA	0.9	176	186	181	0.837	0.932	0.032	aaaGGGAtatt	gi|9837385|gb|AAG00554.1| retinitis pigmentosa GTPase regulator-like protein [Takifugu rubripes]
	BGIBMGA000274-PA	0.88	390	400	395	0.818	0.909	0.029	atcGGCTtagt
	BGIBMGA000274-PA	0.88	1414	1424	1419	0.818	0.889	0.009	ataGGTTtaat
	BGIBMGA000274-PA	0.88	1539	1549	1544	1	0.887	0.007	acaGGGTtgac
sw11005	BGIBMGA000590-PA	0.88	346	356	351	1	0.981	0.101	aagGGGTtata	gi|22474517|dbj|BAC10621.1| Pleiotrophin-like protein [Bombyx mori] Pleiotrophin-like protein [Bombyx mori]
	BGIBMGA000590-PA	0.88	2442	2452	2447	0.818	0.908	0.028	attGGTTtata
sw19806	BGIBMGA000917-PA	0.88	555	565	560	1	0.961	0.081	agtGGGTtatc
	BGIBMGA000917-PA	0.9	1381	1391	1386	0.837	0.932	0.032	aaaGGGAtaaa
	BGIBMGA000917-PA	0.9	1573	1583	1578	0.816	0.9	0	aaaGGGCaatg
	BGIBMGA000917-PA	0.88	1891	1901	1896	0.818	0.899	0.019	agtGGTTtaag
	BGIBMGA000917-PA	0.9	2197	2207	2202	1	0.904	0.004	acaGGGTttag
	BGIBMGA000917-PA	0.88	2365	2375	2370	0.818	0.904	0.024	attGGTTtaca
sw01265	BGIBMGA000944-PA	0.9	843	853	848	1	0.958	0.058	aatGGGTttca	gi|56378321|dbj|BAD74197.1| heat shock protein hsp21.4 [Bombyx mori]
	BGIBMGA000944-PA	0.9	2213	2223	2218	0.837	0.909	0.009	aaaGGGAaata
	BGIBMGA000944-PA	0.9	2250	2260	2255	1	0.908	0.008	aagGGGTgctt
	BGIBMGA000944-PA	0.88	2457	2467	2462	0.818	0.908	0.028	aaaGGCTtaaa
sw07568	BGIBMGA000954-PA	0.9	318	328	323	0.837	0.909	0.009	aaaGGGAaaac
	BGIBMGA000954-PA	0.88	1778	1788	1783	1	0.916	0.036	accGGGTtgtt
sw11374	BGIBMGA001275-PA	0.9	1018	1028	1023	1	0.943	0.043	aatGGGTtcat	gi|66564326|ref|XP_393632.2| PREDICTED: similar to Pgcp protein [Apis mellifera] PREDICTED: similar to Pgcp protein [Apis mellifera]
	BGIBMGA001275-PA	0.88	1419	1429	1424	0.818	0.919	0.039	aatGGTTtagt
	BGIBMGA001275-PA	0.88	2609	2619	2614	0.818	0.919	0.039	aatGGTTtagc
sw08108	BGIBMGA001333-PA	0.88	890	900	895	1	0.972	0.092	atcGGGTtagt	gi|76156035|gb|ABA39861.1| uricase [Bombyx mori]
sw03124	BGIBMGA001611-PA	0.9	610	620	615	1	0.92	0.02	aacGGGTccta	gi|28850409|gb|AAO53177.1| similar to Dictyostelium discoideum (Slime mold). Adenylyl cyclase
sw11729	BGIBMGA001627-PA	0.9	173	183	178	1	0.958	0.058	aatGGGTttcg	gi|24657611|ref|NP_647899.1| CG15019-PA [Drosophila melanogaster] IP04417p [Drosophila melanogaster] CG15019-PA [Drosophila melanogaster]
	BGIBMGA001627-PA	0.88	995	1005	1000	0.909	0.93	0.05	atgGGATtaaa
	BGIBMGA001627-PA	0.9	1114	1124	1119	1	0.985	0.085	aaaGGGTttta
	BGIBMGA001627-PA	0.9	1281	1291	1286	1	0.975	0.075	aaaGGGTcata
	BGIBMGA001627-PA	0.9	1406	1416	1411	1	0.94	0.04	aatGGGTtcgc
	BGIBMGA001627-PA	0.88	1702	1712	1707	0.818	0.899	0.019	atgGGTTtatt
	BGIBMGA001627-PA	0.88	2420	2430	2425	0.909	0.884	0.004	aatGGATtgta
sw01574	BGIBMGA001755-PA	0.88	71	81	76	1	0.896	0.016	attGGGTtgaa	gi|1362608|pir||A53909 gelsolin, secreted form precursor - fruit fly (Drosophila melanogaster) The biology of this fly protein has not yet been explored. Its identification as a secretory gelsolin is based on sequence comparison to the vertebrate gelsolins.; putative
	BGIBMGA001755-PA	0.9	1902	1912	1907	0.837	0.93	0.03	aaaGGGAtaca
sw12330	BGIBMGA001820-PA	0.9	276	286	281	1	1	0.1	aaaGGGTtaac	gi|83003071|ref|XP_622041.2| PREDICTED: similar to DIPB protein [Mus musculus]
sw07794	BGIBMGA001862-PA	0.9	642	652	647	1	0.973	0.073	aaaGGGTtgtc
	BGIBMGA001862-PA	0.9	832	842	837	1	0.943	0.043	aaaGGGTggac
	BGIBMGA001862-PA	0.88	1106	1116	1111	1	0.967	0.087	acgGGGTtacc
	BGIBMGA001862-PA	0.9	1212	1222	1217	1	0.985	0.085	aaaGGGTtttt
	BGIBMGA001862-PA	0.9	2887	2897	2892	1	0.977	0.077	aaaGGGTaata
sw06658	BGIBMGA002175-PA	0.9	832	842	837	0.816	0.9	0	aaaGGGCaaaa	gi|77556574|gb|ABA99370.1| DEAD/DEAH box helicase, putative [Oryza sativa (japonica cultivar-group)]
sw03951	BGIBMGA002408-PA	0.9	1998	2008	2003	1	0.968	0.068	aaaGGGTgacc
	BGIBMGA002408-PA	0.9	2049	2059	2054	0.816	0.906	0.006	aaaGGGCttcc
sw03370	BGIBMGA002629-PA	0.88	2079	2089	2084	0.909	0.911	0.031	agaGGATtata	gi|87248601|gb|ABD36353.1| antennal binding protein [Bombyx mori]
sw03927	BGIBMGA002664-PA	0.9	12	22	17	1	0.95	0.05	aatGGGTcaaa	gi|87248093|gb|ABD36099.1| cuticle protein 3 [Bombyx mori]
	BGIBMGA002664-PA	0.88	428	438	433	1	1	0.12	aacGGGTtaaa
	BGIBMGA002664-PA	0.9	2017	2027	2022	1	0.918	0.018	aatGGGTggac
sw02000	BGIBMGA002715-PA	0.88	1055	1065	1060	0.818	0.89	0.01	atgGGCTtaga	gi|77411051|ref|ZP_00787405.1| cell wall surface anchor family protein [Streptococcus agalactiae CJB111] cell wall surface anchor family protein [Streptococcus agalactiae CJB111]
sw13640	BGIBMGA003025-PA	0.88	119	129	124	1	0.887	0.007	agtGGGTtgat	gi|55647901|ref|XP_524042.1| PREDICTED: similar to transmembrane serine protease 9; polyserase 1 [Pan troglodytes]
	BGIBMGA003025-PA	0.88	2826	2836	2831	0.818	0.918	0.038	actGGTTtaat
sw19690	BGIBMGA003270-PA	0.88	946	956	951	0.909	0.959	0.079	aatGGATtatc	gi|74267404|dbj|BAE44199.1| cuticular protein [Tachypleus tridentatus]
	BGIBMGA003270-PA	0.9	2130	2140	2135	1	0.97	0.07	aaaGGGTtggt
	BGIBMGA003270-PA	0.9	2340	2350	2345	1	0.962	0.062	aaaGGGTattt
sw19551	BGIBMGA003292-PA	0.9	634	644	639	0.837	0.907	0.007	aacGGGAtacg	gi|25140427|gb|AAN71633.1| serine protease inhibitor serpin 1b [Mamestra configurata]
	BGIBMGA003292-PA	0.9	2032	2042	2037	1	1	0.1	aaaGGGTtaat
	BGIBMGA003292-PA	0.9	2540	2550	2545	0.816	0.9	0	aaaGGGCaatt
sw09118	BGIBMGA003332-PA	0.9	2823	2833	2828	0.837	0.93	0.03	aaaGGGAtaca	gi|58394522|ref|XP_320780.2| ENSANGP00000014129 [Anopheles gambiae str. PEST] ENSANGP00000014129 [Anopheles gambiae str. PEST]
sw21232	BGIBMGA003443-PA	0.88	641	651	646	0.818	0.889	0.009	ataGGTTtaaa	gi|77455420|gb|ABA86519.1| CG11156 [Drosophila erecta]
sw01600	BGIBMGA003524-PA	0.88	786	796	791	0.818	0.899	0.019	atgGGCTtaac
	BGIBMGA003524-PA	0.9	1493	1503	1498	1	0.96	0.06	aaaGGGTatgc
sw16494	BGIBMGA003592-PA	0.88	560	570	565	0.909	0.94	0.06	attGGATtata	gi|87248523|gb|ABD36314.1| Lix1 protein [Bombyx mori]
	BGIBMGA003592-PA	0.88	570	580	575	1	0.971	0.091	attGGGTtatg
sw18999	BGIBMGA003694-PA	0.9	344	354	349	1	0.922	0.022	aacGGGTacaa	gi|1403598|gb|AAC47136.1| retinol dehydratase
	BGIBMGA003694-PA	0.9	1177	1187	1182	1	0.937	0.037	aatGGGTatta
	BGIBMGA003694-PA	0.88	1768	1778	1773	0.909	0.931	0.051	aaaGGATtagg
	BGIBMGA003694-PA	0.88	2348	2358	2353	0.909	0.921	0.041	ataGGATtatt
sw11900	BGIBMGA003695-PA	0.88	818	828	823	0.818	0.909	0.029	actGGCTtagt	gi|1403598|gb|AAC47136.1| retinol dehydratase
	BGIBMGA003695-PA	0.88	829	839	834	0.909	0.945	0.065	actGGATtaca
	BGIBMGA003695-PA	0.9	1043	1053	1048	1	0.97	0.07	aaaGGGTgaaa
	BGIBMGA003695-PA	0.88	2174	2184	2179	0.909	0.94	0.06	aaaGGATtaat
sw07028	BGIBMGA004000-PA	0.88	2989	2999	2994	0.909	0.95	0.07	aatGGATtagc	gi|87248331|gb|ABD36218.1| alpha-N-acetylgalactosaminidase [Bombyx mori]
sw18355	BGIBMGA004061-PA	0.9	2145	2155	2150	1	0.928	0.028	aatGGGTgtcc	gi|10801051|dbj|BAB16608.1| 210kDa protein [Sarcophaga peregrina]
	BGIBMGA004061-PA	0.88	2780	2790	2785	0.818	0.908	0.028	attGGTTtaaa
sw13392	BGIBMGA004065-PA	0.9	66	76	71	1	0.941	0.041	aagGGGTtgct	gi|26007526|gb|AAF71290.2| chemosensory protein [Mamestra brassicae]
	BGIBMGA004065-PA	0.88	298	308	303	0.818	0.908	0.028	attGGCTtaaa
	BGIBMGA004065-PA	0.9	594	604	599	1	0.937	0.037	aatGGGTataa
	BGIBMGA004065-PA	0.88	1522	1532	1527	0.818	0.89	0.01	acaGGCTtagt
	BGIBMGA004065-PA	0.88	2525	2535	2530	0.818	0.908	0.028	aaaGGCTtatt
	BGIBMGA004065-PA	0.9	2813	2823	2818	0.837	0.909	0.009	aaaGGGAaaac
sw06237	BGIBMGA004229-PA	0.9	174	184	179	0.816	0.906	0.006	aaaGGGCttcc	gi|28317060|gb|AAO39549.1| RE03380p [Drosophila melanogaster]
	BGIBMGA004229-PA	0.88	1976	1986	1981	0.818	0.923	0.043	accGGCTtaca
sw22720	BGIBMGA004258-PA	0.9	925	935	930	0.837	0.907	0.007	aaaGGGAaagg	gi|37530416|ref|NP_919510.1| putative copia-type polyprotein [Oryza sativa (japonica cultivar-group)] Putative copia-type polyprotein [Oryza sativa (japonica cultivar-group)] retrotransposon protein, putative, Ty1-copia sub-class [Oryza sativa (japonica cultivar-group)]
	BGIBMGA004258-PA	0.9	2123	2133	2128	1	0.941	0.041	aaaGGGTgggt
	BGIBMGA004258-PA	0.88	2849	2859	2854	1	0.911	0.031	accGGGTtgct
	BGIBMGA004258-PA	0.9	2915	2925	2920	1	0.943	0.043	aaaGGGTacgc
sw19929	BGIBMGA004463-PA	0.9	550	560	555	0.837	0.907	0.007	aaaGGGAcaat	gi|217280|dbj|BAA02093.1| hemolymph protein [Bombyx mori]
	BGIBMGA004463-PA	0.9	2496	2506	2501	1	0.946	0.046	aacGGGTgagt
	BGIBMGA004463-PA	0.9	2654	2664	2659	1	0.946	0.046	aacGGGTgagt
	BGIBMGA004463-PA	0.88	2933	2943	2938	1	0.893	0.013	accGGGTtccg
sw01592	BGIBMGA005069-PA	0.9	2167	2177	2172	1	0.945	0.045	aaaGGGTacat
	BGIBMGA005069-PA	0.88	2856	2866	2861	0.909	0.969	0.089	aacGGATtaaa
sw13950	BGIBMGA005170-PA	0.88	393	403	398	0.818	0.928	0.048	aatGGTTtatt	gi|55243720|gb|EAA06365.2| ENSANGP00000008152 [Anopheles gambiae str. PEST] ENSANGP00000008152 [Anopheles gambiae str. PEST]
	BGIBMGA005170-PA	0.88	2214	2224	2219	0.909	0.95	0.07	aatGGATtagc
	BGIBMGA005170-PA	0.88	2357	2367	2362	0.818	0.928	0.048	aatGGTTtaat
	BGIBMGA005170-PA	0.9	2941	2951	2946	0.837	0.907	0.007	aatGGGAtaat
sw03428	BGIBMGA005696-PA	0.88	1264	1274	1269	1	0.897	0.017	accGGGTttat	gi|217201|dbj|BAA01258.1| invertase [Zymomonas mobilis]
	BGIBMGA005696-PA	0.9	2495	2505	2500	1	0.921	0.021	aatGGGTcgcg
sw20836	BGIBMGA005710-PA	0.88	148	158	153	0.818	0.908	0.028	attGGTTtaaa	gi|474339|gb|AAA17752.1| reverse transcriptase [Bombyx mori]
	BGIBMGA005710-PA	0.88	1807	1817	1812	0.818	0.908	0.028	agcGGTTtatc
	BGIBMGA005710-PA	0.9	2685	2695	2690	1	0.973	0.073	aaaGGGTtgaa
sw21135	BGIBMGA005745-PA	0.88	1568	1578	1573	1	0.882	0.002	agtGGGTtgcg	gi|66506650|ref|XP_625203.1| PREDICTED: similar to Dscam [Apis mellifera]
	BGIBMGA005745-PA	0.9	2415	2425	2420	1	0.97	0.07	aaaGGGTgaat
sw20814	BGIBMGA005782-PA	0.9	55	65	60	1	0.968	0.068	aaaGGGTgacc	gi|4239700|emb|CAA10770.1| reverse transcriptase-like [Bos taurus]
	BGIBMGA005782-PA	0.9	693	703	698	1	0.95	0.05	aacGGGTtgaa
	BGIBMGA005782-PA	0.9	735	745	740	1	0.913	0.013	aagGGGTcctt
	BGIBMGA005782-PA	0.88	1043	1053	1048	0.909	0.93	0.05	atgGGATtatc
	BGIBMGA005782-PA	0.9	2751	2761	2756	0.816	0.906	0.006	aaaGGGCttgg
sw22099	BGIBMGA005830-PA	0.88	2464	2474	2469	0.818	0.894	0.014	acaGGTTtact	gi|66518233|ref|XP_392596.2| PREDICTED: similar to putative alcohol dehydrogenase [Apis mellifera]
	BGIBMGA005830-PA	0.88	2608	2618	2613	0.818	0.908	0.028	attGGTTtaaa
sw10272	BGIBMGA005876-PA	0.88	814	824	819	0.909	0.894	0.014	aacGGATtgtt	gi|62662184|ref|XP_214279.3| PREDICTED: similar to stabilin-1 [Rattus norvegicus]
	BGIBMGA005876-PA	0.88	1672	1682	1677	0.818	0.928	0.048	aatGGTTtaaa
	BGIBMGA005876-PA	0.88	1825	1835	1830	0.909	0.911	0.031	agaGGATtaac
sw07530	BGIBMGA006010-PA	0.88	980	990	985	0.909	0.926	0.046	agtGGATtacc
	BGIBMGA006010-PA	0.88	1851	1861	1856	0.818	0.908	0.028	aaaGGTTtaaa
	BGIBMGA006010-PA	0.9	2468	2478	2473	1	0.952	0.052	aatGGGTaata
sw17947	BGIBMGA006176-PA	0.88	252	262	257	0.909	0.911	0.031	agaGGATtatg	gi|76779438|gb|AAI06213.1| LOC446918 protein [Xenopus laevis]
sw15875	BGIBMGA006235-PA	0.9	1016	1026	1021	0.816	0.923	0.023	aaaGGGCtatt	gi|27463044|gb|AAO15689.1| Riddle 4 [Xenopus laevis]
	BGIBMGA006235-PA	0.88	1180	1190	1185	0.818	0.908	0.028	agcGGTTtaac
	BGIBMGA006235-PA	0.9	1932	1942	1937	1	0.913	0.013	aagGGGTccac
	BGIBMGA006235-PA	0.88	2128	2138	2133	0.818	0.908	0.028	attGGTTtatc
sw03075	BGIBMGA006742-PA	0.88	915	925	920	0.909	0.93	0.05	atgGGATtatc	gi|49532924|dbj|BAD26697.1| troponin C type IIIa-like protein [Plutella xylostella]
sw06928	BGIBMGA006793-PA	0.88	681	691	686	0.909	0.884	0.004	aatGGATtgac	gi|37360502|dbj|BAC98229.1| mKIAA1668 protein [Mus musculus]
	BGIBMGA006793-PA	0.88	935	945	940	0.909	0.964	0.084	aacGGATtaca
	BGIBMGA006793-PA	0.88	2002	2012	2007	1	0.902	0.022	actGGGTtgct
	BGIBMGA006793-PA	0.88	2051	2061	2056	0.818	0.904	0.024	aaaGGTTtaca
	BGIBMGA006793-PA	0.9	2302	2312	2307	1	0.943	0.043	aatGGGTtcag
sw05458	BGIBMGA006846-PA	0.88	2686	2696	2691	0.909	0.94	0.06	attGGATtatg	gi|72074172|ref|XP_800520.1| PREDICTED: hypothetical protein XP_795427, partial [Strongylocentrotus purpuratus]
sw19900	BGIBMGA006846-PA	0.88	2686	2696	2691	0.909	0.94	0.06	attGGATtatg	gi|72074172|ref|XP_800520.1| PREDICTED: hypothetical protein XP_795427, partial [Strongylocentrotus purpuratus]
sw17365	BGIBMGA006874-PA	0.88	414	424	419	0.818	0.908	0.028	acgGGCTtaaa	gi|2564721|gb|AAB81850.1| chitinase [Aedes aegypti]
	BGIBMGA006874-PA	0.9	504	514	509	1	0.925	0.025	aatGGGTagat
	BGIBMGA006874-PA	0.88	693	703	698	1	0.942	0.062	agaGGGTtaac
	BGIBMGA006874-PA	0.88	1275	1285	1280	0.818	0.909	0.029	actGGCTtaga
	BGIBMGA006874-PA	0.9	1932	1942	1937	1	0.92	0.02	aatGGGTacag
sw05953	BGIBMGA007258-PA	0.9	52	62	57	1	0.916	0.016	aagGGGTcgcc	gi|48139441|ref|XP_397008.1| PREDICTED: similar to Diacetyl/L-xylulose reductase [Apis mellifera]
	BGIBMGA007258-PA	0.88	1640	1650	1645	0.818	0.889	0.009	ataGGCTtaat
	BGIBMGA007258-PA	0.88	1791	1801	1796	1	0.967	0.087	attGGGTtacg
	BGIBMGA007258-PA	0.9	2785	2795	2790	1	0.941	0.041	aaaGGGTggga
sw05070	BGIBMGA007558-PA	0.88	515	525	520	0.818	0.88	0	ataGGTTtagt
	BGIBMGA007558-PA	0.88	1804	1814	1809	0.818	0.899	0.019	agtGGTTtatt
	BGIBMGA007558-PA	0.9	1901	1911	1906	1	0.952	0.052	aacGGGTcaat
sw09342	BGIBMGA007584-PA	0.88	1278	1288	1283	0.909	0.911	0.031	agaGGATtaaa	gi|55391488|gb|AAH85356.1| Tubgcp3 protein [Rattus norvegicus]
	BGIBMGA007584-PA	0.88	1710	1720	1715	0.818	0.914	0.034	aagGGCTtaca
sw16552	BGIBMGA007893-PA	0.9	2049	2059	2054	1	0.916	0.016	aatGGGTcccc	gi|41400384|gb|AAS07044.1| plus agglutinin [Chlamydomonas reinhardtii]
	BGIBMGA007893-PA	0.9	2615	2625	2620	1	0.948	0.048	aaaGGGTcgtc
	BGIBMGA007893-PA	0.9	2881	2891	2886	1	0.985	0.085	aaaGGGTtttg
sw07534	BGIBMGA008519-PA	0.88	2436	2446	2441	0.818	0.899	0.019	atgGGCTtata	gi|67475506|ref|XP_653447.1| Viral A-type inclusion protein repeat [Entamoeba histolytica HM-1:IMSS] Viral A-type inclusion protein repeat, putative [Entamoeba histolytica HM-1:IMSS]
sw18561	BGIBMGA008579-PA	0.9	210	220	215	1	0.946	0.046	aatGGGTgata
	BGIBMGA008579-PA	0.88	650	660	655	0.818	0.899	0.019	agtGGTTtaaa
sw22798	BGIBMGA008716-PA	0.88	319	329	324	0.909	0.949	0.069	aagGGATtaat	gi|2058458|gb|AAB53257.1| p260 [Bombyx mori]
	BGIBMGA008716-PA	0.88	2296	2306	2301	0.909	0.911	0.031	agaGGATtatg
	BGIBMGA008716-PA	0.88	2763	2773	2768	0.909	0.93	0.05	agtGGATtaat
sw11655	BGIBMGA009062-PA	0.88	101	111	106	0.818	0.928	0.048	aatGGCTtatt	gi|25013142|gb|AAN71684.1| SD18148p [Drosophila melanogaster]
	BGIBMGA009062-PA	0.9	1113	1123	1118	1	0.95	0.05	aaaGGGTagaa
	BGIBMGA009062-PA	0.88	1902	1912	1907	1	0.981	0.101	actGGGTtaac
sw11982	BGIBMGA009263-PA	0.88	56	66	61	1	0.887	0.007	acaGGGTtgac	gi|961466|dbj|BAA09850.1| adhesive plaque matrix protein [Mytilus coruscus] Adhesive plaque matrix protein precursor (Foot protein 1) (MCFP1)
	BGIBMGA009263-PA	0.88	550	560	555	1	0.896	0.016	acgGGGTtgag
sw22607	BGIBMGA010045-PA	0.88	1120	1130	1125	0.818	0.899	0.019	aaaGGCTtagg	gi|4239700|emb|CAA10770.1| reverse transcriptase-like [Bos taurus]
	BGIBMGA010045-PA	0.88	2163	2173	2168	0.909	0.93	0.05	agtGGATtatg
	BGIBMGA010045-PA	0.9	2644	2654	2649	1	0.96	0.06	aatGGGTtttc
sw08471	BGIBMGA010236-PA	0.9	639	649	644	1	0.953	0.053	aagGGGTttgt	gi|66523500|ref|XP_394029.2| PREDICTED: similar to Aminomethyltransferase, mitochondrial precursor (Glycine cleavage system T protein) (GCVT) [Apis mellifera]
	BGIBMGA010236-PA	0.88	705	715	710	0.909	0.949	0.069	actGGATtatg
	BGIBMGA010236-PA	0.88	2272	2282	2277	0.909	0.94	0.06	aagGGATtagg
sw16993	BGIBMGA010338-PA	0.9	697	707	702	0.837	0.909	0.009	aaaGGGAaaac	gi|73976657|ref|XP_539546.2| PREDICTED: similar to aminoadipate-semialdehyde synthase [Canis familiaris]
	BGIBMGA010338-PA	0.9	2796	2806	2801	1	0.943	0.043	aacGGGTtcgc
sw19262	BGIBMGA010735-PA	0.88	83	93	88	0.909	0.926	0.046	agtGGATtacc	gi|2970687|gb|AAC06038.1| beta-glucosidase precursor [Spodoptera frugiperda]
	BGIBMGA010735-PA	0.88	2091	2101	2096	0.909	0.94	0.06	agcGGATtaag
	BGIBMGA010735-PA	0.9	2270	2280	2275	1	0.96	0.06	aatGGGTtttt
sw16520	BGIBMGA010763-PA	0.9	420	430	425	0.837	0.907	0.007	aatGGGAtaat	gi|6984243|gb|AAF34809.1| SP1029 protein [Drosophila melanogaster]
	BGIBMGA010763-PA	0.88	1383	1393	1388	1	0.961	0.081	atgGGGTtaag
	BGIBMGA010763-PA	0.9	1408	1418	1413	1	0.955	0.055	aaaGGGTgtta
sw07012	BGIBMGA010784-PA	0.88	500	510	505	0.909	0.949	0.069	actGGATtatc	gi|13937893|gb|AAH07054.1| TBC1D7 protein [Homo sapiens] TBC1 domain family, member 7 [Homo sapiens] HSPC239 [Homo sapiens] TBC1 domain family, member 7 [Homo sapiens] TBC1 domain family member 7
	BGIBMGA010784-PA	0.9	1933	1943	1938	1	0.945	0.045	aacGGGTtcta
sw09741	BGIBMGA010795-PA	0.88	43	53	48	0.909	0.94	0.06	aaaGGATtaat	gi|88193380|emb|CAJ77191.1| beta1,4-galactosyltransferase 7 [Drosophila mojavensis]
	BGIBMGA010795-PA	0.9	198	208	203	0.816	0.906	0.006	aaaGGGCttct
	BGIBMGA010795-PA	0.88	1240	1250	1245	0.909	0.921	0.041	atgGGATtagc
	BGIBMGA010795-PA	0.9	1308	1318	1313	0.837	0.905	0.005	aatGGGAtacg
	BGIBMGA010795-PA	0.9	2002	2012	2007	1	0.96	0.06	aatGGGTttta
sw11085	BGIBMGA010939-PA	0.9	472	482	477	0.837	0.907	0.007	aatGGGAtaac
sw14228	BGIBMGA011009-PA	0.88	145	155	150	1	0.887	0.007	atgGGGTtgtg	gi|37360086|dbj|BAC98021.1| mKIAA0776 protein [Mus musculus]
	BGIBMGA011009-PA	0.9	721	731	726	0.837	0.907	0.007	aaaGGGAaaga
	BGIBMGA011009-PA	0.9	827	837	832	1	0.998	0.098	aaaGGGTtaga
	BGIBMGA011009-PA	0.88	1252	1262	1257	1	0.981	0.101	actGGGTtatg
sw21369	BGIBMGA011077-PA	0.9	643	653	648	1	0.924	0.024	aagGGGTgtgg
	BGIBMGA011077-PA	0.88	1261	1271	1266	0.818	0.899	0.019	aaaGGCTtagt
	BGIBMGA011077-PA	0.88	2083	2093	2088	1	0.882	0.002	atgGGGTtgcg
sw06424	BGIBMGA011079-PA	0.9	214	224	219	1	0.937	0.037	aatGGGTattc	gi|6560645|gb|AAF16700.1| juvenile hormone binding protein precursor-like protein [Manduca sexta]
	BGIBMGA011079-PA	0.88	914	924	919	0.818	0.937	0.057	aacGGTTtatg
sw17808	BGIBMGA011209-PA	0.88	655	665	660	0.909	0.921	0.041	agtGGATtagg	gi|48865723|ref|ZP_00319582.1| COG1063: Threonine dehydrogenase and related Zn-dependent dehydrogenases [Oenococcus oeni PSU-1]
	BGIBMGA011209-PA	0.88	1699	1709	1704	0.818	0.918	0.038	actGGTTtatt
sw12337	BGIBMGA011266-PA	0.88	1059	1069	1064	0.818	0.904	0.024	attGGTTtaca	gi|134925|sp|P09179|SSP1_BOMMO Sex-specific storage-protein 1 precursor (SP 1) (Methionine-rich storage protein)
	BGIBMGA011266-PA	0.9	1748	1758	1753	1	0.913	0.013	aagGGGTggag
sw06827	BGIBMGA011319-PA	0.9	2643	2653	2648	1	0.925	0.025	aatGGGTagtt	gi|72165852|ref|XP_794895.1| PREDICTED: similar to RIKEN cDNA 5930412E23 [Strongylocentrotus purpuratus]
sw09808	BGIBMGA011525-PA	0.88	742	752	747	0.818	0.89	0.01	agtGGTTtaga	gi|89290411|gb|EAR88399.1| Bifunctional endo-1,4-beta-xylanase xylA precursor, putative [Tetrahymena thermophila SB210]
	BGIBMGA011525-PA	0.9	1875	1885	1880	1	0.92	0.02	aatGGGTacta
sw09519	BGIBMGA011530-PA	0.88	421	431	426	0.909	0.94	0.06	aaaGGATtata
	BGIBMGA011530-PA	0.88	769	779	774	0.818	0.928	0.048	aatGGCTtaag
	BGIBMGA011530-PA	0.88	1799	1809	1804	1	0.981	0.101	aagGGGTtatg
	BGIBMGA011530-PA	0.9	2267	2277	2272	1	0.92	0.02	aatGGGTacta
	BGIBMGA011530-PA	0.9	2523	2533	2528	1	0.935	0.035	aatGGGTcttt
sw14127	BGIBMGA011660-PA	0.9	443	453	448	0.837	0.93	0.03	aaaGGGAtaca	gi|76155807|gb|AAX27080.2| SJCHGC02359 protein [Schistosoma japonicum]
	BGIBMGA011660-PA	0.9	734	744	739	1	0.931	0.031	aagGGGTcttt
	BGIBMGA011660-PA	0.9	1871	1881	1876	1	0.921	0.021	aatGGGTcggc
sw20536	BGIBMGA011896-PA	0.9	1401	1411	1406	0.837	0.909	0.009	aaaGGGAaaaa
	BGIBMGA011896-PA	0.9	1606	1616	1611	1	0.962	0.062	aaaGGGTattt
	BGIBMGA011896-PA	0.88	2900	2910	2905	0.909	0.959	0.079	aatGGATtatt
	BGIBMGA011896-PA	0.9	2967	2977	2972	1	1	0.1	aaaGGGTtaat
sw09554	BGIBMGA011901-PA	0.88	2573	2583	2578	1	0.887	0.007	actGGGTttag	gb|ADA84147.1| sericin 2 precursor [Bombyx mori]
sw13546	BGIBMGA011901-PA	0.88	2573	2583	2578	1	0.887	0.007	actGGGTttag	gb|ADA84147.1| sericin 2 precursor [Bombyx mori]
sw03548	BGIBMGA012831-PA	0.88	10	20	15	0.818	0.923	0.043	aatGGCTtacc	gi|50764028|ref|XP_422928.1| PREDICTED: similar to aldose reductase [Gallus gallus]
	BGIBMGA012831-PA	0.9	1133	1143	1138	1	0.96	0.06	aatGGGTtttt
	BGIBMGA012831-PA	0.88	1426	1436	1431	0.909	0.94	0.06	attGGATtaat
sw17508	BGIBMGA012921-PA	0.88	641	651	646	0.909	0.94	0.06	attGGATtaac	gi|72108581|ref|XP_789912.1| PREDICTED: similar to myosin 18A isoform a, partial [Strongylocentrotus purpuratus]
sw06691	BGIBMGA013021-PA	0.88	748	758	753	0.909	0.926	0.046	acaGGATtaca	gi|45330818|dbj|BAD12426.1| fructose 1,6-bisphosphate aldolase [Antheraea yamamai]
	BGIBMGA013021-PA	0.9	1757	1767	1762	1	0.97	0.07	aaaGGGTgatt
	BGIBMGA013021-PA	0.88	2319	2329	2324	0.909	0.931	0.051	aaaGGATtaga
	BGIBMGA013021-PA	0.88	2470	2480	2475	0.818	0.908	0.028	agcGGCTtata
	BGIBMGA013021-PA	0.9	2684	2694	2689	1	0.998	0.098	aaaGGGTtagt
sw12555	BGIBMGA013047-PA	0.88	2319	2329	2324	1	0.897	0.017	accGGGTtttt	gi|2058460|gb|AAB53258.1| p270 [Bombyx mori]
	BGIBMGA013047-PA	0.88	2818	2828	2823	0.909	0.921	0.041	ataGGATtaat
	BGIBMGA013047-PA	0.9	2888	2898	2893	1	1	0.1	aaaGGGTtatt
sw09227	BGIBMGA013301-PA	0.88	2611	2621	2616	0.909	0.959	0.079	aatGGATtaac
sw08173	BGIBMGA013304-PA	0.9	72	82	77	0.837	0.93	0.03	aaaGGGAtaca
	BGIBMGA013304-PA	0.9	1033	1043	1038	1	0.915	0.015	aagGGGTacac
	BGIBMGA013304-PA	0.88	2092	2102	2097	1	0.981	0.101	atcGGGTtaag
sw17712	BGIBMGA013342-PA	0.9	422	432	427	0.837	0.902	0.002	aaaGGGAgaac	gi|2498144|sp|Q25490|APLP_MANSE Apolipophorins precursor [Contains: Apolipophorin-2 (Apolipophorin II) (apoLp-2); Apolipophorin-1 (Apolipophorin I) (apoLp-1)] apolipophorin precursor protein
	BGIBMGA013342-PA	0.88	558	568	563	0.818	0.899	0.019	agtGGTTtatt
	BGIBMGA013342-PA	0.88	923	933	928	0.818	0.908	0.028	attGGCTtaag
	BGIBMGA013342-PA	0.88	1693	1703	1698	0.818	0.908	0.028	aaaGGTTtata
	BGIBMGA013342-PA	0.9	1757	1767	1762	1	1	0.1	aaaGGGTtaat
sw13143	BGIBMGA013342-PA	0.9	422	432	427	0.837	0.902	0.002	aaaGGGAgaac	gi|2498144|sp|Q25490|APLP_MANSE Apolipophorins precursor [Contains: Apolipophorin-2 (Apolipophorin II) (apoLp-2); Apolipophorin-1 (Apolipophorin I) (apoLp-1)] apolipophorin precursor protein
	BGIBMGA013342-PA	0.88	558	568	563	0.818	0.899	0.019	agtGGTTtatt
	BGIBMGA013342-PA	0.88	923	933	928	0.818	0.908	0.028	attGGCTtaag
	BGIBMGA013342-PA	0.88	1693	1703	1698	0.818	0.908	0.028	aaaGGTTtata
	BGIBMGA013342-PA	0.9	1757	1767	1762	1	1	0.1	aaaGGGTtaat
sw22045	BGIBMGA013342-PA	0.9	422	432	427	0.837	0.902	0.002	aaaGGGAgaac
	BGIBMGA013342-PA	0.88	558	568	563	0.818	0.899	0.019	agtGGTTtatt
	BGIBMGA013342-PA	0.88	923	933	928	0.818	0.908	0.028	attGGCTtaag
	BGIBMGA013342-PA	0.88	1693	1703	1698	0.818	0.908	0.028	aaaGGTTtata
	BGIBMGA013342-PA	0.9	1757	1767	1762	1	1	0.1	aaaGGGTtaat
sw00382	BGIBMGA013593-PA	0.9	1900	1910	1905	1	0.923	0.023	aatGGGTaggt	gi|87248199|gb|ABD36152.1| perilipin [Bombyx mori]
	BGIBMGA013593-PA	0.9	2444	2454	2449	0.837	0.909	0.009	aaaGGGAaaat
sw17700	BGIBMGA013893-PA	0.9	1293	1303	1298	0.837	0.93	0.03	aaaGGGAtaca	gi|45552295|ref|NP_995670.1| CG15828-PB, isoform B [Drosophila melanogaster] CG15828-PB, isoform B [Drosophila melanogaster]
	BGIBMGA013893-PA	0.9	2109	2119	2114	1	0.92	0.02	aacGGGTggag
	BGIBMGA013893-PA	0.9	2116	2126	2121	1	0.958	0.058	aaaGGGTctcc
sw09817	BGIBMGA014279-PA	0.88	299	309	304	0.818	0.899	0.019	acgGGCTtagt
	BGIBMGA014279-PA	0.88	2756	2766	2761	0.909	0.916	0.036	ataGGATtaca
sw19436	BGIBMGA014356-PA	0.88	423	433	428	0.909	0.969	0.089	aacGGATtaaa	gi|72133877|ref|XP_788695.1| PREDICTED: similar to predicted CDS, reverse transcriptase family member (1O881) [Strongylocentrotus purpuratus]
sw08791	BGIBMGA014404-PA	0.88	1359	1369	1364	0.818	0.928	0.048	aatGGCTtaag	gi|25992174|gb|AAN77090.1| masquerade-like serine proteinase homolog [Bombyx mori]
