# Supplementary material for: Microarray Analysis of the Juvenile Hormone Response in Larval Integument of the Silkworm, Bombyx mori
Source: Int J Genomics. 2014 Apr 6;2014:426025. doi: 10.1155/2014/426025 (PMC3997853; doi:10.1155/2014/426025)
Supplement: Supplementary file 1 — Supplementary Figure 1: Hierarchical clustering of a total of 8,670 genes expressed in the silkworm integument samples. A gene was considered to be expressed in a integument sample if its expression signal intensity was greater than 400 units. Supplementary Table 1: All real time RT-PCR primers used in this study. Supplementary Table 2: The list of 8,670 genes expressed in the silkworm integument samples. Integument-E: the integument sample treated with JHA methoprene. Integument-C: the integument sample treated with pure acetone. Supplementary Table 3: The list of 2,143 JHA-modulated genes with 2.0-fold expression change after JHA application. Supplementary Table 4: Correlation between microarray data and real time RT-PCR results. A good correlation was defined if the Pearson correlation coefficient (r) is greater than 0.7. Supplementary Table 5: All KEGG pathways that JHA-modulated genes were involved in. Supplementary Table 6: Coexpression classes of all JHA-modulated genes. Supplementary Table 7: JHA-induced genes that contain the binding motifs of Kr-h1 in their upstream UTR regions. Supplementary Table 8: JHA-modulated genes that are involved in each KEGG pathway. [file 426025.f1.zip › Supplementary materials/Table S8.xls]

## Sheet: 1-Carbohydrate metabolism
Table S8 JHA-modulated genes involved in each KEGG pathway
KEGG pathway and Probe	Probe	12 Hat	24 Hat	36 Hat	48 Hat		KEGG ID	Probe KEGG annotation
Glycolysis / Gluconeogenesis
sw00132	sw00132	1.0479	1.1632	1.2562	8.7852		K14085	ALDH7A1; aldehyde dehydrogenase family 7 member A1 [EC:1.2.1.31 1.2.1.8 1.2.1.3]
sw03637	sw03637	1.1242	0.7848	0.6138	6.6094		K01785	E5.1.3.3, galM; aldose 1-epimerase [EC:5.1.3.3]
sw04448	sw04448	1.4673	0.9986	1.2304	3.838		K03841	FBP, fbp; fructose-1,6-bisphosphatase I [EC:3.1.3.11]
sw06503	sw06503	1.274	0.9824	0.8249	0.4416		K01085	agp; glucose-1-phosphatase [EC:3.1.3.10]
sw06691	sw06691	1.5968	1.378	2.0853	4.1992		K01623	ALDO; fructose-bisphosphate aldolase, class I [EC:4.1.2.13]
sw09712	sw09712	0.9083	1.1353	1.1662	5.3129		K00128	E1.2.1.3; aldehyde dehydrogenase (NAD+) [EC:1.2.1.3]
sw10994	sw10994	1.2415	0.8693	0.5146	0.0682		K00002	AKR1A1, adh; alcohol dehydrogenase (NADP+) [EC:1.1.1.2]
sw17679	sw17679	1.0952	1.0564	1.6336	2.9425		K01835	pgm; phosphoglucomutase [EC:5.4.2.2]
sw17859	sw17859	0.8151	1.1945	1.5946	2.6772		K01835	pgm; phosphoglucomutase [EC:5.4.2.2]
sw18911	sw18911	0.6522	1.1798	2.3853	1.1982		K00129	E1.2.1.5; aldehyde dehydrogenase (NAD(P)+) [EC:1.2.1.5]
sw19274	sw19274	1.0379	0.9943	0.9618	2.0368		K01689	ENO, eno; enolase [EC:4.2.1.11]
sw19777	sw19777	1.2291	0.9832	0.6182	8.612		K01785	E5.1.3.3, galM; aldose 1-epimerase [EC:5.1.3.3]
sw21062	sw21062	0.9125	1.6155	1.8567	3.0103		K01810	GPI, pgi; glucose-6-phosphate isomerase [EC:5.3.1.9]
sw22892	sw22892	0.7277	1.1228	1.9009	2.2039		K00873	PK, pyk; pyruvate kinase [EC:2.7.1.40]
Citrate cycle (TCA cycle)
sw01281	sw01281	1.4219	2.1632	3.5001	2.1269		K01958	PC, pyc; pyruvate carboxylase [EC:6.4.1.1]
sw01836	sw01836	0.8672	1.0144	1.4517	0.3702		K00030	IDH3; isocitrate dehydrogenase (NAD+) [EC:1.1.1.41]
sw05999	sw05999	0.835	1.147	1.8032	0.4008		K00234	SDHA, SDH1; succinate dehydrogenase (ubiquinone) flavoprotein subunit [EC:1.3.5.1]
sw06088	sw06088	0.8891	0.8563	1.0074	3.3457		K00025	MDH1; malate dehydrogenase [EC:1.1.1.37]
sw06329	sw06329	0.9377	1.302	1.3004	3.067		K00031	IDH1, IDH2, icd; isocitrate dehydrogenase [EC:1.1.1.42]
sw08124	sw08124	0.7851	0.8788	0.8102	0.3489		K00237	SDHD, SDH4; succinate dehydrogenase (ubiquinone) membrane anchor subunit
sw10755	sw10755	1.4865	0.9625	0.9508	0.3112		K00164	OGDH, sucA; 2-oxoglutarate dehydrogenase E1 component [EC:1.2.4.2]
sw10937	sw10937	0.6898	1.0484	1.7198	0.3931		K01681	ACO, acnA; aconitate hydratase 1 / homoaconitase [EC:4.2.1.3 4.2.1.-]
sw13400	sw13400	0.8482	0.8769	1.0308	0.2649		K00030	IDH3; isocitrate dehydrogenase (NAD+) [EC:1.1.1.41]
sw14808	sw14808	0.7585	1.6034	2.028	0.8026		K00026	MDH2; malate dehydrogenase [EC:1.1.1.37]
sw20350	sw20350	1.0561	1.1926	1.8381	0.4681		K01681	ACO, acnA; aconitate hydratase 1 / homoaconitase [EC:4.2.1.3 4.2.1.-]
Pentose phosphate pathway
sw00306	sw00306	0.7718	0.9803	1.1717	2.4718		K00615	E2.2.1.1, tktA, tktB; transketolase [EC:2.2.1.1]
sw00611	sw00611	1.192	1.0677	0.9425	4.3876		K01057	PGLS, pgl, devB; 6-phosphogluconolactonase [EC:3.1.1.31]
sw01471	sw01471	1.0405	1.1266	0.9077	3.5241		K00033	E1.1.1.44, PGD, gnd; 6-phosphogluconate dehydrogenase [EC:1.1.1.44]
sw04154	sw04154	1.0168	1.2291	1.3942	11.9504		K00948	PRPS, prsA; ribose-phosphate pyrophosphokinase [EC:2.7.6.1]
sw04448	sw04448	1.4673	0.9986	1.2304	3.838		K03841	FBP, fbp; fructose-1,6-bisphosphatase I [EC:3.1.3.11]
sw06691	sw06691	1.5968	1.378	2.0853	4.1992		K01623	ALDO; fructose-bisphosphate aldolase, class I [EC:4.1.2.13]
sw14215	sw14215	0.9024	0.7745	0.6886	2.2109		K00616	E2.2.1.2, talA, talB; transaldolase [EC:2.2.1.2]
sw17679	sw17679	1.0952	1.0564	1.6336	2.9425		K01835	pgm; phosphoglucomutase [EC:5.4.2.2]
sw17859	sw17859	0.8151	1.1945	1.5946	2.6772		K01835	pgm; phosphoglucomutase [EC:5.4.2.2]
sw21062	sw21062	0.9125	1.6155	1.8567	3.0103		K01810	GPI, pgi; glucose-6-phosphate isomerase [EC:5.3.1.9]
Pentose and glucuronate interconversions
sw03726	sw03726	1.4746	1.04	0.6671	7.2148		K03331	DCXR; L-xylulose reductase [EC:1.1.1.10]
sw05953	sw05953	1.5766	1.1648	0.4516	6.8748		K03331	DCXR; L-xylulose reductase [EC:1.1.1.10]
sw06973	sw06973	0.723	0.4298	0.3112	0.3088		K00699	UGT; glucuronosyltransferase [EC:2.4.1.17]
sw07418	sw07418	1.0505	1.2151	0.7764	0.0966		K00011	E1.1.1.21, AKR1; aldehyde reductase [EC:1.1.1.21]
sw07985	sw07985	1.451	1.0002	0.658	16.3955		K13247	CRYL1; L-gulonate 3-dehydrogenase [EC:1.1.1.45]
sw09712	sw09712	0.9083	1.1353	1.1662	5.3129		K00128	E1.2.1.3; aldehyde dehydrogenase (NAD+) [EC:1.2.1.3]
sw10579	sw10579	0.769	1.0866	0.7522	0.42		K00011	E1.1.1.21, AKR1; aldehyde reductase [EC:1.1.1.21]
sw12759	sw12759	1.1541	1.2114	1.2192	5.5336		K00963	UGP2, galU, galF; UTP--glucose-1-phosphate uridylyltransferase [EC:2.7.7.9]
sw13973	sw13973	0.8053	2.3002	6.1746	0.4082		K00012	UGDH, ugd; UDPglucose 6-dehydrogenase [EC:1.1.1.22]
sw17644	sw17644	1.1133	1.0931	0.9854	11.3398		K00011	E1.1.1.21, AKR1; aldehyde reductase [EC:1.1.1.21]
sw18729	sw18729	0.8917	1.0387	0.409	0.2729		K00699	UGT; glucuronosyltransferase [EC:2.4.1.17]
sw19163	sw19163	0.571	1.1633	2.1173	1.7329		K00699	UGT; glucuronosyltransferase [EC:2.4.1.17]
sw21098	sw21098	1.2712	1.0223	0.7559	6.0899		K00078	DHDH; dihydrodiol dehydrogenase / D-xylose 1-dehydrogenase (NADP) [EC:1.3.1.20 1.1.1.179]
sw22710	sw22710	0.8042	1.3182	1.8117	2.7984		K00699	UGT; glucuronosyltransferase [EC:2.4.1.17]
Fructose and mannose metabolism
sw04448	sw04448	1.4673	0.9986	1.2304	3.838		K03841	FBP, fbp; fructose-1,6-bisphosphatase I [EC:3.1.3.11]
sw06691	sw06691	1.5968	1.378	2.0853	4.1992		K01623	ALDO; fructose-bisphosphate aldolase, class I [EC:4.1.2.13]
sw07418	sw07418	1.0505	1.2151	0.7764	0.0966		K00011	E1.1.1.21, AKR1; aldehyde reductase [EC:1.1.1.21]
sw10579	sw10579	0.769	1.0866	0.7522	0.42		K00011	E1.1.1.21, AKR1; aldehyde reductase [EC:1.1.1.21]
sw15867	sw15867	0.7079	0.5734	1.974	2.1611		K02377	E1.1.1.271, fcl; GDP-L-fucose synthase [EC:1.1.1.271]
sw16815	sw16815	0.8212	0.7087	1.6122	2.4399		K02377	E1.1.1.271, fcl; GDP-L-fucose synthase [EC:1.1.1.271]
sw17644	sw17644	1.1133	1.0931	0.9854	11.3398		K00011	E1.1.1.21, AKR1; aldehyde reductase [EC:1.1.1.21]
sw17808	sw17808	1.6294	1.5181	1.2233	23.3863		K00008	E1.1.1.14, gutB; L-iditol 2-dehydrogenase [EC:1.1.1.14]
sw19662	sw19662	1.53	0.7851	1.0989	6.0274		K00100	E1.1.1.-; [EC:1.1.1.-]
sw22929	sw22929	1.0243	0.9536	0.6916	9.0786		K00100	E1.1.1.-; [EC:1.1.1.-]
Galactose metabolism
sw03428	sw03428	8.0038	0.6745	5.1109	3.3182		K01193	E3.2.1.26, sacA; beta-fructofuranosidase [EC:3.2.1.26]
sw05025	sw05025	1.1842	1.3933	2.1464	7.9901		K12309	GLB1, ELNR1; beta-galactosidase [EC:3.2.1.23]
sw07028	sw07028	2.1098	1.7069	7.033	8.584		K01189	GLA; alpha-galactosidase [EC:3.2.1.22]
sw07418	sw07418	1.0505	1.2151	0.7764	0.0966		K00011	E1.1.1.21, AKR1; aldehyde reductase [EC:1.1.1.21]
sw08156	sw08156	1.0317	0.9457	1.0597	9.9519		K01187	E3.2.1.20, malZ; alpha-glucosidase [EC:3.2.1.20]
sw09747	sw09747	1.3684	1.3891	7.6374	9.2355		K01189	GLA; alpha-galactosidase [EC:3.2.1.22]
sw10579	sw10579	0.769	1.0866	0.7522	0.42		K00011	E1.1.1.21, AKR1; aldehyde reductase [EC:1.1.1.21]
sw11414	sw11414	0.7521	0.9644	0.8753	3.556		K01784	galE, GALE; UDP-glucose 4-epimerase [EC:5.1.3.2]
sw12759	sw12759	1.1541	1.2114	1.2192	5.5336		K00963	UGP2, galU, galF; UTP--glucose-1-phosphate uridylyltransferase [EC:2.7.7.9]
sw17644	sw17644	1.1133	1.0931	0.9854	11.3398		K00011	E1.1.1.21, AKR1; aldehyde reductase [EC:1.1.1.21]
sw17679	sw17679	1.0952	1.0564	1.6336	2.9425		K01835	pgm; phosphoglucomutase [EC:5.4.2.2]
sw17859	sw17859	0.8151	1.1945	1.5946	2.6772		K01835	pgm; phosphoglucomutase [EC:5.4.2.2]
Ascorbate and aldarate metabolism
sw00132	sw00132	1.0479	1.1632	1.2562	8.7852		K14085	ALDH7A1; aldehyde dehydrogenase family 7 member A1 [EC:1.2.1.31 1.2.1.8 1.2.1.3]
sw03217	sw03217	0.8929	1.2445	1.1139	10.9656		K00469	MIOX; inositol oxygenase [EC:1.13.99.1]
sw06973	sw06973	0.723	0.4298	0.3112	0.3088		K00699	UGT; glucuronosyltransferase [EC:2.4.1.17]
sw09712	sw09712	0.9083	1.1353	1.1662	5.3129		K00128	E1.2.1.3; aldehyde dehydrogenase (NAD+) [EC:1.2.1.3]
sw13973	sw13973	0.8053	2.3002	6.1746	0.4082		K00012	UGDH, ugd; UDPglucose 6-dehydrogenase [EC:1.1.1.22]
sw18729	sw18729	0.8917	1.0387	0.409	0.2729		K00699	UGT; glucuronosyltransferase [EC:2.4.1.17]
sw19163	sw19163	0.571	1.1633	2.1173	1.7329		K00699	UGT; glucuronosyltransferase [EC:2.4.1.17]
sw22710	sw22710	0.8042	1.3182	1.8117	2.7984		K00699	UGT; glucuronosyltransferase [EC:2.4.1.17]
Starch and sucrose metabolism
sw03428	sw03428	8.0038	0.6745	5.1109	3.3182		K01193	E3.2.1.26, sacA; beta-fructofuranosidase [EC:3.2.1.26]
sw03754	sw03754	0.8445	0.9356	0.9192	2.3858		K00700	glgB; 1,4-alpha-glucan branching enzyme [EC:2.4.1.18]
sw04028	sw04028	1.2477	0.7633	0.8938	2.3849		K01188	E3.2.1.21; beta-glucosidase [EC:3.2.1.21]
sw06973	sw06973	0.723	0.4298	0.3112	0.3088		K00699	UGT; glucuronosyltransferase [EC:2.4.1.17]
sw08156	sw08156	1.0317	0.9457	1.0597	9.9519		K01187	E3.2.1.20, malZ; alpha-glucosidase [EC:3.2.1.20]
sw09024	sw09024	0.8037	0.9789	0.5427	13.6808		K16055	TPS; trehalose 6-phosphate synthase/phosphatase [EC:2.4.1.15 3.1.3.12]
sw11637	sw11637	1.8764	2.4207	4.1283	5.9247		K01188	E3.2.1.21; beta-glucosidase [EC:3.2.1.21]
sw12759	sw12759	1.1541	1.2114	1.2192	5.5336		K00963	UGP2, galU, galF; UTP--glucose-1-phosphate uridylyltransferase [EC:2.7.7.9]
sw13002	sw13002	0.5903	1.075	1.033	0.2395		K01176	E3.2.1.1, amyA, malS; alpha-amylase [EC:3.2.1.1]
sw13973	sw13973	0.8053	2.3002	6.1746	0.4082		K00012	UGDH, ugd; UDPglucose 6-dehydrogenase [EC:1.1.1.22]
sw17679	sw17679	1.0952	1.0564	1.6336	2.9425		K01835	pgm; phosphoglucomutase [EC:5.4.2.2]
sw17859	sw17859	0.8151	1.1945	1.5946	2.6772		K01835	pgm; phosphoglucomutase [EC:5.4.2.2]
sw18729	sw18729	0.8917	1.0387	0.409	0.2729		K00699	UGT; glucuronosyltransferase [EC:2.4.1.17]
sw19163	sw19163	0.571	1.1633	2.1173	1.7329		K00699	UGT; glucuronosyltransferase [EC:2.4.1.17]
sw19262	sw19262	1.9308	1.3749	2.2479	1.3034		K01188	E3.2.1.21; beta-glucosidase [EC:3.2.1.21]
sw20784	sw20784	1.2053	1.2788	1.3183	2.8477		K00688	E2.4.1.1, glgP, PYG; starch phosphorylase [EC:2.4.1.1]
sw20972	sw20972	1.1563	1.0722	1.2175	0.0445		K01194	E3.2.1.28, treA, treF; alpha,alpha-trehalase [EC:3.2.1.28]
sw21062	sw21062	0.9125	1.6155	1.8567	3.0103		K01810	GPI, pgi; glucose-6-phosphate isomerase [EC:5.3.1.9]
sw22710	sw22710	0.8042	1.3182	1.8117	2.7984		K00699	UGT; glucuronosyltransferase [EC:2.4.1.17]
Amino sugar and nucleotide sugar metabolism
sw04397	sw04397	0.8016	0.7865	0.5132	0.3261		K00621	E2.3.1.4, GNA1; glucosamine-phosphate N-acetyltransferase [EC:2.3.1.4]
sw08485	sw08485	1.1166	1.2506	3.6088	1.1474		K01183	E3.2.1.14; chitinase [EC:3.2.1.14]
sw08657	sw08657	0.9942	1.1435	0.7855	0.077		K00698	CHS1; chitin synthase [EC:2.4.1.16]
sw09267	sw09267	2.4287	3.4031	5.2388	1.5257		K01183	E3.2.1.14; chitinase [EC:3.2.1.14]
sw11414	sw11414	0.7521	0.9644	0.8753	3.556		K01784	galE, GALE; UDP-glucose 4-epimerase [EC:5.1.3.2]
sw11659	sw11659	1.1593	1.2066	1.4458	3.8127		K05304	NANS, SAS; sialic acid synthase [EC:2.5.1.56 2.5.1.57]
sw12447	sw12447	1.1871	1.3094	1.4119	3.4958		K05304	NANS, SAS; sialic acid synthase [EC:2.5.1.56 2.5.1.57]
sw12759	sw12759	1.1541	1.2114	1.2192	5.5336		K00963	UGP2, galU, galF; UTP--glucose-1-phosphate uridylyltransferase [EC:2.7.7.9]
sw13973	sw13973	0.8053	2.3002	6.1746	0.4082		K00012	UGDH, ugd; UDPglucose 6-dehydrogenase [EC:1.1.1.22]
sw14631	sw14631	1.4639	1.483	1.4733	13.7477		K01639	E4.1.3.3, nanA, NPL; N-acetylneuraminate lyase [EC:4.1.3.3]
sw15867	sw15867	0.7079	0.5734	1.974	2.1611		K02377	E1.1.1.271, fcl; GDP-L-fucose synthase [EC:1.1.1.271]
sw16815	sw16815	0.8212	0.7087	1.6122	2.4399		K02377	E1.1.1.271, fcl; GDP-L-fucose synthase [EC:1.1.1.271]
sw17365	sw17365	4.8371	6.9281	14.2048	2.4616		K01183	E3.2.1.14; chitinase [EC:3.2.1.14]
sw17679	sw17679	1.0952	1.0564	1.6336	2.9425		K01835	pgm; phosphoglucomutase [EC:5.4.2.2]
sw17859	sw17859	0.8151	1.1945	1.5946	2.6772		K01835	pgm; phosphoglucomutase [EC:5.4.2.2]
sw18447	sw18447	0.7051	1.0778	1.3574	17.3733		K12373	HEXA_B; hexosaminidase [EC:3.2.1.52]
sw19182	sw19182	0.8424	1.2862	5.408	0.7807		K12373	HEXA_B; hexosaminidase [EC:3.2.1.52]
sw20215	sw20215	0.7352	1.1077	1.3325	43.7749		K12373	HEXA_B; hexosaminidase [EC:3.2.1.52]
sw21062	sw21062	0.9125	1.6155	1.8567	3.0103		K01810	GPI, pgi; glucose-6-phosphate isomerase [EC:5.3.1.9]
sw22618	sw22618	1.3756	1.6053	1.5533	6.6853		K12373	HEXA_B; hexosaminidase [EC:3.2.1.52]
Pyruvate metabolism
sw00132	sw00132	1.0479	1.1632	1.2562	8.7852		K14085	ALDH7A1; aldehyde dehydrogenase family 7 member A1 [EC:1.2.1.31 1.2.1.8 1.2.1.3]
sw01281	sw01281	1.4219	2.1632	3.5001	2.1269		K01958	PC, pyc; pyruvate carboxylase [EC:6.4.1.1]
sw01916	sw01916	0.7976	1.1092	1.1509	0.3987		K00029	E1.1.1.40, maeB; malate dehydrogenase (oxaloacetate-decarboxylating)(NADP+) [EC:1.1.1.40]
sw06088	sw06088	0.8891	0.8563	1.0074	3.3457		K00025	MDH1; malate dehydrogenase [EC:1.1.1.37]
sw07418	sw07418	1.0505	1.2151	0.7764	0.0966		K00011	E1.1.1.21, AKR1; aldehyde reductase [EC:1.1.1.21]
sw07767	sw07767	0.8966	1.297	2.1188	0.7161		K01067	E3.1.2.1, ACH1; acetyl-CoA hydrolase [EC:3.1.2.1]
sw08612	sw08612	1.162	1.5703	1.1119	3.7879		K01007	pps, ppsA; pyruvate, water dikinase [EC:2.7.9.2]
sw09712	sw09712	0.9083	1.1353	1.1662	5.3129		K00128	E1.2.1.3; aldehyde dehydrogenase (NAD+) [EC:1.2.1.3]
sw09857	sw09857	1.0308	1.0263	0.9843	2.4369		K01069	E3.1.2.6, gloB; hydroxyacylglutathione hydrolase [EC:3.1.2.6]
sw10579	sw10579	0.769	1.0866	0.7522	0.42		K00011	E1.1.1.21, AKR1; aldehyde reductase [EC:1.1.1.21]
sw14808	sw14808	0.7585	1.6034	2.028	0.8026		K00026	MDH2; malate dehydrogenase [EC:1.1.1.37]
sw17644	sw17644	1.1133	1.0931	0.9854	11.3398		K00011	E1.1.1.21, AKR1; aldehyde reductase [EC:1.1.1.21]
sw21913	sw21913	0.7959	0.8219	0.8872	2.5742		K00626	E2.3.1.9, atoB; acetyl-CoA C-acetyltransferase [EC:2.3.1.9]
sw22892	sw22892	0.7277	1.1228	1.9009	2.2039		K00873	PK, pyk; pyruvate kinase [EC:2.7.1.40]
sw22915	sw22915	0.8612	0.7176	0.5688	16.0602		K00626	E2.3.1.9, atoB; acetyl-CoA C-acetyltransferase [EC:2.3.1.9]
Glyoxylate and dicarboxylate metabolism
sw01800	sw01800	0.7934	0.8942	0.7037	6.5495		K00830	AGXT; alanine-glyoxylate transaminase / serine-glyoxylate transaminase / serine-pyruvate transaminase [EC:2.6.1.44 2.6.1.45 2.6.1.51]
sw03153	sw03153	0.7958	1.2434	1.2339	3.5002		K01915	glnA; glutamine synthetase [EC:6.3.1.2]
sw03241	sw03241	0.6545	0.7911	0.598	6.4195		K02437	gcvH, GCSH; glycine cleavage system H protein
sw03328	sw03328	0.8616	1.3165	1.6718	6.5405		K00600	glyA, SHMT; glycine hydroxymethyltransferase [EC:2.1.2.1]
sw03619	sw03619	1.4177	1.9693	1.625	2.7031		K03781	katE, CAT, catB, srpA; catalase [EC:1.11.1.6]
sw06088	sw06088	0.8891	0.8563	1.0074	3.3457		K00025	MDH1; malate dehydrogenase [EC:1.1.1.37]
sw07091	sw07091	0.7796	0.678	0.4047	2.8098		K01915	glnA; glutamine synthetase [EC:6.3.1.2]
sw09451	sw09451	1.3681	0.965	0.6807	4.5545		K11517	HAO; (S)-2-hydroxy-acid oxidase [EC:1.1.3.15]
sw10937	sw10937	0.6898	1.0484	1.7198	0.3931		K01681	ACO, acnA; aconitate hydratase 1 / homoaconitase [EC:4.2.1.3 4.2.1.-]
sw11858	sw11858	1.2023	1.4239	1.8451	5.7537		K00600	glyA, SHMT; glycine hydroxymethyltransferase [EC:2.1.2.1]
sw14808	sw14808	0.7585	1.6034	2.028	0.8026		K00026	MDH2; malate dehydrogenase [EC:1.1.1.37]
sw16181	sw16181	1.1254	0.7784	0.6024	3.4545		K11517	HAO; (S)-2-hydroxy-acid oxidase [EC:1.1.3.15]
sw16358	sw16358	1.0731	1.0802	1.0075	8.9264		K01816	E5.3.1.22, gip; hydroxypyruvate isomerase [EC:5.3.1.22]
sw16392	sw16392	0.9747	1.0611	0.8105	9.9041		K01816	E5.3.1.22, gip; hydroxypyruvate isomerase [EC:5.3.1.22]
sw20350	sw20350	1.0561	1.1926	1.8381	0.4681		K01681	ACO, acnA; aconitate hydratase 1 / homoaconitase [EC:4.2.1.3 4.2.1.-]
sw21168	sw21168	0.71	0.8369	0.3847	3.1594		K01915	glnA; glutamine synthetase [EC:6.3.1.2]
sw21913	sw21913	0.7959	0.8219	0.8872	2.5742		K00626	E2.3.1.9, atoB; acetyl-CoA C-acetyltransferase [EC:2.3.1.9]
sw22915	sw22915	0.8612	0.7176	0.5688	16.0602		K00626	E2.3.1.9, atoB; acetyl-CoA C-acetyltransferase [EC:2.3.1.9]
Propanoate metabolism
sw00132	sw00132	1.0479	1.1632	1.2562	8.7852		K14085	ALDH7A1; aldehyde dehydrogenase family 7 member A1 [EC:1.2.1.31 1.2.1.8 1.2.1.3]
sw03110	sw03110	0.7924	0.7006	0.7099	2.449		K13524	ABAT; 4-aminobutyrate aminotransferase / (S)-3-amino-2-methylpropionate transaminase [EC:2.6.1.19 2.6.1.22]
sw09712	sw09712	0.9083	1.1353	1.1662	5.3129		K00128	E1.2.1.3; aldehyde dehydrogenase (NAD+) [EC:1.2.1.3]
sw19440	sw19440	1.1531	1.1445	0.9626	5.5366		K07511	ECHS1; enoyl-CoA hydratase [EC:4.2.1.17]
sw21913	sw21913	0.7959	0.8219	0.8872	2.5742		K00626	E2.3.1.9, atoB; acetyl-CoA C-acetyltransferase [EC:2.3.1.9]
sw22915	sw22915	0.8612	0.7176	0.5688	16.0602		K00626	E2.3.1.9, atoB; acetyl-CoA C-acetyltransferase [EC:2.3.1.9]
Butanoate metabolism
sw03110	sw03110	0.7924	0.7006	0.7099	2.449		K13524	ABAT; 4-aminobutyrate aminotransferase / (S)-3-amino-2-methylpropionate transaminase [EC:2.6.1.19 2.6.1.22]
sw03490	sw03490	1.173	1.1373	1.5765	7.7259		K01640	E4.1.3.4, HMGCL, hmgL; hydroxymethylglutaryl-CoA lyase [EC:4.1.3.4]
sw18740	sw18740	0.9065	0.7677	0.6868	3.0729		K01027	OXCT; 3-oxoacid CoA-transferase [EC:2.8.3.5]
sw19440	sw19440	1.1531	1.1445	0.9626	5.5366		K07511	ECHS1; enoyl-CoA hydratase [EC:4.2.1.17]
sw19662	sw19662	1.53	0.7851	1.0989	6.0274		K00100	E1.1.1.-; [EC:1.1.1.-]
sw21913	sw21913	0.7959	0.8219	0.8872	2.5742		K00626	E2.3.1.9, atoB; acetyl-CoA C-acetyltransferase [EC:2.3.1.9]
sw22915	sw22915	0.8612	0.7176	0.5688	16.0602		K00626	E2.3.1.9, atoB; acetyl-CoA C-acetyltransferase [EC:2.3.1.9]
sw22929	sw22929	1.0243	0.9536	0.6916	9.0786		K00100	E1.1.1.-; [EC:1.1.1.-]
Inositol phosphate metabolism
sw03217	sw03217	0.8929	1.2445	1.1139	10.9656		K00469	MIOX; inositol oxygenase [EC:1.13.99.1]
sw09759	sw09759	0.7617	1.0397	0.6594	0.1748		K00888	PI4K; phosphatidylinositol 4-kinase [EC:2.7.1.67]
sw17981	sw17981	1.119	1.2039	1.7593	0.4719		K05858	PLCB; phosphatidylinositol phospholipase C, beta [EC:3.1.4.11]

## Sheet: 2-Energy metabolism
KEGG pathway and Probe	Probe	12 Hat	24 Hat	36 Hat	48 Hat		KEGG ID	Probe KEGG annotation
Oxidative phosphorylation
sw00795	sw00795	0.3566	0.5476	1.2134	0.793		K02147	ATPeVB, ATP6B1; V-type H+-transporting ATPase subunit B [EC:3.6.3.14]
sw04026	sw04026	0.1348	0.2604	0.4901	1.1525		K02154	ATPeVI, ATP6N1A; V-type H+-transporting ATPase subunit I [EC:3.6.3.14]
sw05999	sw05999	0.835	1.147	1.8032	0.4008		K00234	SDHA, SDH1; succinate dehydrogenase (ubiquinone) flavoprotein subunit [EC:1.3.5.1]
sw07674	sw07674	0.4649	0.4387	0.9958	0.8516		K02155	ATPeVPL, ATP6L; V-type H+-transporting ATPase 16kDa proteolipid subunit [EC:3.6.3.14]
sw08124	sw08124	0.7851	0.8788	0.8102	0.3489		K00237	SDHD, SDH4; succinate dehydrogenase (ubiquinone) membrane anchor subunit
sw09128	sw09128	0.1805	0.1737	0.3606	0.9897		K02154	ATPeVI, ATP6N1A; V-type H+-transporting ATPase subunit I [EC:3.6.3.14]
sw09511	sw09511	0.2937	0.1774	0.5116	1.0322		K02154	ATPeVI, ATP6N1A; V-type H+-transporting ATPase subunit I [EC:3.6.3.14]
sw09888	sw09888	0.4311	0.5661	0.8316	0.6518		K02146	ATPeVAC39, ATP6D; V-type H+-transporting ATPase subunit AC39 [EC:3.6.3.14]
sw12174	sw12174	0.3271	0.3318	0.5023	1.0187		K02123	ATPVI, ntpI; V-type H+-transporting ATPase subunit I [EC:3.6.3.14]
sw13277	sw13277	0.4965	0.4747	0.8375	0.6693		K02152	ATPeVG, ATP6G1; V-type H+-transporting ATPase subunit G [EC:3.6.3.14]
sw14354	sw14354	0.3273	0.5146	0.8376	0.7157		K02148	ATPeVC, ATP6C; V-type H+-transporting ATPase subunit C [EC:3.6.3.14]
sw14397	sw14397	0.5403	0.4871	0.9046	1.1714		K03661	ATPeVPF, ATP6F; V-type H+-transporting ATPase 21kDa proteolipid subunit [EC:3.6.3.14]
sw14793	sw14793	0.4426	0.4606	0.9044	1.0252		K02150	ATPeVE, ATP6E; V-type H+-transporting ATPase subunit E [EC:3.6.3.14]
sw21938	sw21938	0.5659	0.4888	1.0303	0.7864		K02144	ATPeV54kD; V-type H+-transporting ATPase 54 kD subunit [EC:3.6.3.14]
sw22916	sw22916	0.3141	0.6481	1.7557	0.5276		K02145	ATPeVA, ATP6A1; V-type H+-transporting ATPase subunit A [EC:3.6.3.14]
Carbon fixation in photosynthetic organisms
sw00306	sw00306	0.7718	0.9803	1.1717	2.4718		K00615	E2.2.1.1, tktA, tktB; transketolase [EC:2.2.1.1]
sw01916	sw01916	0.7976	1.1092	1.1509	0.3987		K00029	E1.1.1.40, maeB; malate dehydrogenase (oxaloacetate-decarboxylating)(NADP+) [EC:1.1.1.40]
sw04448	sw04448	1.4673	0.9986	1.2304	3.838		K03841	FBP, fbp; fructose-1,6-bisphosphatase I [EC:3.1.3.11]
sw06088	sw06088	0.8891	0.8563	1.0074	3.3457		K00025	MDH1; malate dehydrogenase [EC:1.1.1.37]
sw06691	sw06691	1.5968	1.378	2.0853	4.1992		K01623	ALDO; fructose-bisphosphate aldolase, class I [EC:4.1.2.13]
sw10674	sw10674	0.8739	1.9873	1.7589	2.6006		K14455	GOT2; aspartate aminotransferase, mitochondrial [EC:2.6.1.1]
sw14438	sw14438	0.7954	1.4748	1.8548	2.4792		K14455	GOT2; aspartate aminotransferase, mitochondrial [EC:2.6.1.1]
sw14808	sw14808	0.7585	1.6034	2.028	0.8026		K00026	MDH2; malate dehydrogenase [EC:1.1.1.37]
sw22892	sw22892	0.7277	1.1228	1.9009	2.2039		K00873	PK, pyk; pyruvate kinase [EC:2.7.1.40]
Carbon fixation pathways in prokaryotes
sw08612	sw08612	1.162	1.5703	1.1119	3.7879		K01007	pps, ppsA; pyruvate, water dikinase [EC:2.7.9.2]
sw01281	sw01281	1.4219	2.1632	3.5001	2.1269		K01958	PC, pyc; pyruvate carboxylase [EC:6.4.1.1]
sw21913	sw21913	0.7959	0.8219	0.8872	2.5742		K00626	E2.3.1.9, atoB; acetyl-CoA C-acetyltransferase [EC:2.3.1.9]
sw22915	sw22915	0.8612	0.7176	0.5688	16.0602		K00626	E2.3.1.9, atoB; acetyl-CoA C-acetyltransferase [EC:2.3.1.9]
sw06329	sw06329	0.9377	1.302	1.3004	3.067		K00031	IDH1, IDH2, icd; isocitrate dehydrogenase [EC:1.1.1.42]
sw10937	sw10937	0.6898	1.0484	1.7198	0.3931		K01681	ACO, acnA; aconitate hydratase 1 / homoaconitase [EC:4.2.1.3 4.2.1.-]
sw20350	sw20350	1.0561	1.1926	1.8381	0.4681		K01681	ACO, acnA; aconitate hydratase 1 / homoaconitase [EC:4.2.1.3 4.2.1.-]
Methane metabolism
sw00210	sw00210	0.8701	0.9073	1.1177	2.0338		K00058	serA, PHGDH; D-3-phosphoglycerate dehydrogenase [EC:1.1.1.95]
sw01800	sw01800	0.7934	0.8942	0.7037	6.5495		K00830	AGXT; alanine-glyoxylate transaminase / serine-glyoxylate transaminase / serine-pyruvate transaminase [EC:2.6.1.44 2.6.1.45 2.6.1.51]
sw03328	sw03328	0.8616	1.3165	1.6718	6.5405		K00600	glyA, SHMT; glycine hydroxymethyltransferase [EC:2.1.2.1]
sw04448	sw04448	1.4673	0.9986	1.2304	3.838		K03841	FBP, fbp; fructose-1,6-bisphosphatase I [EC:3.1.3.11]
sw05928	sw05928	1.0236	1.1115	1.1108	6.3938		K00863	E2.7.1.29, DAK1, DAK2; dihydroxyacetone kinase [EC:2.7.1.29]
sw06691	sw06691	1.5968	1.378	2.0853	4.1992		K01623	ALDO; fructose-bisphosphate aldolase, class I [EC:4.1.2.13]
sw07324	sw07324	1.2842	1.2941	1.0885	3.3352		K00831	serC, PSAT1; phosphoserine aminotransferase [EC:2.6.1.52]
sw08612	sw08612	1.162	1.5703	1.1119	3.7879		K01007	pps, ppsA; pyruvate, water dikinase [EC:2.7.9.2]
sw08708	sw08708	0.6471	0.9268	0.7494	0.4655		K00485	E1.14.13.8; dimethylaniline monooxygenase (N-oxide forming) [EC:1.14.13.8]
sw11858	sw11858	1.2023	1.4239	1.8451	5.7537		K00600	glyA, SHMT; glycine hydroxymethyltransferase [EC:2.1.2.1]
sw12174	sw12174	0.3271	0.3318	0.5023	1.0187		K02123	ATPVI, ntpI; V-type H+-transporting ATPase subunit I [EC:3.6.3.14]
sw13964	sw13964	1.0117	1.3086	0.9848	2.2544		K01079	serB, PSPH; phosphoserine phosphatase [EC:3.1.3.3]
sw19274	sw19274	1.0379	0.9943	0.9618	2.0368		K01689	ENO, eno; enolase [EC:4.2.1.11]
Nitrogen metabolism
sw03153	sw03153	0.7958	1.2434	1.2339	3.5002		K01915	glnA; glutamine synthetase [EC:6.3.1.2]
sw03787	sw03787	0.6127	0.8706	1.6355	0.3716		K01672	E4.2.1.1; carbonic anhydrase [EC:4.2.1.1]
sw07091	sw07091	0.7796	0.678	0.4047	2.8098		K01915	glnA; glutamine synthetase [EC:6.3.1.2]
sw08471	sw08471	1.5031	1.1745	1.0363	4.4718		K00605	gcvT, AMT; aminomethyltransferase [EC:2.1.2.10]
sw11016	sw11016	0.8987	0.7547	0.6074	0.2267		K01953	asnB, ASNS; asparagine synthase (glutamine-hydrolysing) [EC:6.3.5.4]
sw12457	sw12457	0.688	1.3343	1.895	0.4465		K00261	GLUD1_2, gdhA; glutamate dehydrogenase (NAD(P)+) [EC:1.4.1.3]
sw21168	sw21168	0.71	0.8369	0.3847	3.1594		K01915	glnA; glutamine synthetase [EC:6.3.1.2]

## Sheet: 3-Lipid metabolism
KEGG pathway and Probe	Probe	12 Hat	24 Hat	36 Hat	48 Hat		KEGG ID	Probe KEGG annotation
Fatty acid biosynthesis
sw12555	sw12555	1.5531	1.4916	4.7296	1.6462		K00665	FASN; fatty acid synthase, animal type [EC:2.3.1.85]
sw19113	sw19113	1.567	0.8882	2.3655	1.259		K00059	fabG; 3-oxoacyl-[acyl-carrier protein] reductase [EC:1.1.1.100]
sw20168	sw20168	0.9375	0.8293	61.5891	1.3157		K00665	FASN; fatty acid synthase, animal type [EC:2.3.1.85]
Fatty acid elongation
sw00305	sw00305	0.9702	0.7912	1.0436	5.3804		K10251	HSD17B12, KAR, IFA38; 17beta-estradiol 17-dehydrogenase / very-long-chain 3-oxoacyl-CoA reductase [EC:1.1.1.62 1.1.1.330]
sw03915	sw03915	1.2229	1.291	1.7534	11.1115		K01074	PPT; palmitoyl-protein thioesterase [EC:3.1.2.22]
sw07055	sw07055	0.8873	1.2409	3.2533	1.1832		K07509	HADHB; acetyl-CoA acyltransferase [EC:2.3.1.16]
sw13503	sw13503	0.9744	1.483	2.2496	1.4441		K07509	HADHB; acetyl-CoA acyltransferase [EC:2.3.1.16]
sw14293	sw14293	0.6798	0.8622	0.8746	0.0396		K10250	ELOVL7; elongation of very long chain fatty acids protein 7 [EC:2.3.1.199]
sw19273	sw19273	1.3203	1.567	0.9805	0.3333		K07508	ACAA2; acetyl-CoA acyltransferase 2 [EC:2.3.1.16]
sw19440	sw19440	1.1531	1.1445	0.9626	5.5366		K07511	ECHS1; enoyl-CoA hydratase [EC:4.2.1.17]
Fatty acid metabolism
sw00132	sw00132	1.0479	1.1632	1.2562	8.7852		K14085	ALDH7A1; aldehyde dehydrogenase family 7 member A1 [EC:1.2.1.31 1.2.1.8 1.2.1.3]
sw02887	sw02887	1.3078	0.817	0.3336	0.163		K14338	cypD_E, CYP102A2_3; cytochrome P450 / NADPH-cytochrome P450 reductase [EC:1.14.14.1 1.6.2.4]
sw07055	sw07055	0.8873	1.2409	3.2533	1.1832		K07509	HADHB; acetyl-CoA acyltransferase [EC:2.3.1.16]
sw08616	sw08616	1.0248	0.9049	0.8228	4.6415		K00252	GCDH, gcdH; glutaryl-CoA dehydrogenase [EC:1.3.8.6]
sw09449	sw09449	0.8498	0.9043	0.7117	2.3025		K09478	ACADSB; short/branched chain acyl-CoA dehydrogenase [EC:1.3.99.12]
sw09712	sw09712	0.9083	1.1353	1.1662	5.3129		K00128	E1.2.1.3; aldehyde dehydrogenase (NAD+) [EC:1.2.1.3]
sw13503	sw13503	0.9744	1.483	2.2496	1.4441		K07509	HADHB; acetyl-CoA acyltransferase [EC:2.3.1.16]
sw14804	sw14804	0.8676	1.0314	2.3611	1.3108		K00232	E1.3.3.6, ACOX1, ACOX3; acyl-CoA oxidase [EC:1.3.3.6]
sw14881	sw14881	1.0208	0.837	0.7882	3.9223		K01897	ACSL, fadD; long-chain acyl-CoA synthetase [EC:6.2.1.3]
sw15130	sw15130	0.9592	1.1062	2.024	0.9991		K09479	ACADVL; very long chain acyl-CoA dehydrogenase [EC:1.3.8.9]
sw16601	sw16601	0.8846	0.9494	0.7338	3.3891		K09478	ACADSB; short/branched chain acyl-CoA dehydrogenase [EC:1.3.99.12]
sw19273	sw19273	1.3203	1.567	0.9805	0.3333		K07508	ACAA2; acetyl-CoA acyltransferase 2 [EC:2.3.1.16]
sw19440	sw19440	1.1531	1.1445	0.9626	5.5366		K07511	ECHS1; enoyl-CoA hydratase [EC:4.2.1.17]
sw21913	sw21913	0.7959	0.8219	0.8872	2.5742		K00626	E2.3.1.9, atoB; acetyl-CoA C-acetyltransferase [EC:2.3.1.9]
sw22915	sw22915	0.8612	0.7176	0.5688	16.0602		K00626	E2.3.1.9, atoB; acetyl-CoA C-acetyltransferase [EC:2.3.1.9]
Synthesis and degradation of ketone bodies
sw03490	sw03490	1.173	1.1373	1.5765	7.7259		K01640	E4.1.3.4, HMGCL, hmgL; hydroxymethylglutaryl-CoA lyase [EC:4.1.3.4]
sw18740	sw18740	0.9065	0.7677	0.6868	3.0729		K01027	OXCT; 3-oxoacid CoA-transferase [EC:2.8.3.5]
sw21913	sw21913	0.7959	0.8219	0.8872	2.5742		K00626	E2.3.1.9, atoB; acetyl-CoA C-acetyltransferase [EC:2.3.1.9]
sw22915	sw22915	0.8612	0.7176	0.5688	16.0602		K00626	E2.3.1.9, atoB; acetyl-CoA C-acetyltransferase [EC:2.3.1.9]
Cutin, suberine and wax biosynthesis
sw09099	sw09099	2.0187	2.323	2.5897	8.3419		K13356	FAR; fatty acyl-CoA reductase [EC:1.2.1.-]
Steroid biosynthesis
sw04343	sw04343	0.5568	0.4657	0.5191	0.3651		K09828	DHCR24; delta24-sterol reductase [EC:1.3.1.72]
sw11832	sw11832	2.0259	0.9789	0.8442	0.4995		K05917	CYP51; cytochrome P450, family 51 (sterol 14-demethylase) [EC:1.14.13.70]
sw13499	sw13499	1.2894	1.3438	1.1536	0.1957		K12298	CEL; bile salt-stimulated lipase [EC:3.1.1.3 3.1.1.13]
Steroid hormone biosynthesis
sw00305	sw00305	0.9702	0.7912	1.0436	5.3804		K10251	HSD17B12, KAR, IFA38; 17beta-estradiol 17-dehydrogenase / very-long-chain 3-oxoacyl-CoA reductase [EC:1.1.1.62 1.1.1.330]
sw06973	sw06973	0.723	0.4298	0.3112	0.3088		K00699	UGT; glucuronosyltransferase [EC:2.4.1.17]
sw18729	sw18729	0.8917	1.0387	0.409	0.2729		K00699	UGT; glucuronosyltransferase [EC:2.4.1.17]
sw19163	sw19163	0.571	1.1633	2.1173	1.7329		K00699	UGT; glucuronosyltransferase [EC:2.4.1.17]
sw22710	sw22710	0.8042	1.3182	1.8117	2.7984		K00699	UGT; glucuronosyltransferase [EC:2.4.1.17]
Glycerolipid metabolism
sw00132	sw00132	1.0479	1.1632	1.2562	8.7852		K14085	ALDH7A1; aldehyde dehydrogenase family 7 member A1 [EC:1.2.1.31 1.2.1.8 1.2.1.3]
sw03391	sw03391	0.9333	0.8563	2.1305	3.2068		K01080	PPAP2; phosphatidate phosphatase [EC:3.1.3.4]
sw05928	sw05928	1.0236	1.1115	1.1108	6.3938		K00863	E2.7.1.29, DAK1, DAK2; dihydroxyacetone kinase [EC:2.7.1.29]
sw07028	sw07028	2.1098	1.7069	7.033	8.584		K01189	GLA; alpha-galactosidase [EC:3.2.1.22]
sw07418	sw07418	1.0505	1.2151	0.7764	0.0966		K00011	E1.1.1.21, AKR1; aldehyde reductase [EC:1.1.1.21]
sw09712	sw09712	0.9083	1.1353	1.1662	5.3129		K00128	E1.2.1.3; aldehyde dehydrogenase (NAD+) [EC:1.2.1.3]
sw09747	sw09747	1.3684	1.3891	7.6374	9.2355		K01189	GLA; alpha-galactosidase [EC:3.2.1.22]
sw10579	sw10579	0.769	1.0866	0.7522	0.42		K00011	E1.1.1.21, AKR1; aldehyde reductase [EC:1.1.1.21]
sw10994	sw10994	1.2415	0.8693	0.5146	0.0682		K00002	AKR1A1, adh; alcohol dehydrogenase (NADP+) [EC:1.1.1.2]
sw13499	sw13499	1.2894	1.3438	1.1536	0.1957		K12298	CEL; bile salt-stimulated lipase [EC:3.1.1.3 3.1.1.13]
sw17644	sw17644	1.1133	1.0931	0.9854	11.3398		K00011	E1.1.1.21, AKR1; aldehyde reductase [EC:1.1.1.21]
sw17708	sw17708	1.123	0.854	2.0211	0.0194		K00901	E2.7.1.107, DGK, dgkA; diacylglycerol kinase (ATP dependent) [EC:2.7.1.107]
sw18197	sw18197	1.1814	0.9369	1.5964	5.0304		K01046	E3.1.1.3; triacylglycerol lipase [EC:3.1.1.3]
Glycerophospholipid metabolism
sw00954	sw00954	0.9715	0.9197	0.3561	0.4524		K01047	PLA2G, SPLA2; secretory phospholipase A2 [EC:3.1.1.4]
sw03391	sw03391	0.9333	0.8563	2.1305	3.2068		K01080	PPAP2; phosphatidate phosphatase [EC:3.1.3.4]
sw15541	sw15541	1.378	0.9516	0.8712	0.3738		K00111	glpA, glpD; glycerol-3-phosphate dehydrogenase [EC:1.1.5.3]
sw16854	sw16854	1.3725	1.553	0.7032	12.5114		K01126	E3.1.4.46, glpQ, ugpQ; glycerophosphoryl diester phosphodiesterase [EC:3.1.4.46]
sw17708	sw17708	1.123	0.854	2.0211	0.0194		K00901	E2.7.1.107, DGK, dgkA; diacylglycerol kinase (ATP dependent) [EC:2.7.1.107]
sw21299	sw21299	0.9214	0.9655	0.9579	7.9078		K00993	EPT1; ethanolaminephosphotransferase [EC:2.7.8.1]
Ether lipid metabolism
sw00954	sw00954	0.9715	0.9197	0.3561	0.4524		K01047	PLA2G, SPLA2; secretory phospholipase A2 [EC:3.1.1.4]
sw03391	sw03391	0.9333	0.8563	2.1305	3.2068		K01080	PPAP2; phosphatidate phosphatase [EC:3.1.3.4]
sw21299	sw21299	0.9214	0.9655	0.9579	7.9078		K00993	EPT1; ethanolaminephosphotransferase [EC:2.7.8.1]
Sphingolipid metabolism
sw03391	sw03391	0.9333	0.8563	2.1305	3.2068		K01080	PPAP2; phosphatidate phosphatase [EC:3.1.3.4]
sw05025	sw05025	1.1842	1.3933	2.1464	7.9901		K12309	GLB1, ELNR1; beta-galactosidase [EC:3.2.1.23]
sw06076	sw06076	1.0295	1.0981	1.7376	4.0734		K12350	SMPD1, ASM; sphingomyelin phosphodiesterase [EC:3.1.4.12]
sw07028	sw07028	2.1098	1.7069	7.033	8.584		K01189	GLA; alpha-galactosidase [EC:3.2.1.22]
sw07423	sw07423	1.0341	1.0856	0.836	0.4329		K17108	GBA2; non-lysosomal glucosylceramidase [EC:3.2.1.45]
sw09747	sw09747	1.3684	1.3891	7.6374	9.2355		K01189	GLA; alpha-galactosidase [EC:3.2.1.22]
sw11624	sw11624	0.67	1.1396	2.1034	4.3475		K12350	SMPD1, ASM; sphingomyelin phosphodiesterase [EC:3.1.4.12]
sw15372	sw15372	0.7812	1.1773	1.5781	5.924		K01201	GBA, srfJ; glucosylceramidase [EC:3.2.1.45]
Arachidonic acid metabolism
sw00954	sw00954	0.9715	0.9197	0.3561	0.4524		K01047	PLA2G, SPLA2; secretory phospholipase A2 [EC:3.1.1.4]
sw02154	sw02154	0.7993	0.9776	1.2137	7.1153		K00681	ggt; gamma-glutamyltranspeptidase [EC:2.3.2.2]
Linoleic acid metabolism
sw00954	sw00954	0.9715	0.9197	0.3561	0.4524		K01047	PLA2G, SPLA2; secretory phospholipase A2 [EC:3.1.1.4]
sw19662	sw19662	1.53	0.7851	1.0989	6.0274		K00100	E1.1.1.-; [EC:1.1.1.-]
sw22929	sw22929	1.0243	0.9536	0.6916	9.0786		K00100	E1.1.1.-; [EC:1.1.1.-]
alpha-Linolenic acid metabolism
sw00954	sw00954	0.9715	0.9197	0.3561	0.4524		K01047	PLA2G, SPLA2; secretory phospholipase A2 [EC:3.1.1.4]
sw14804	sw14804	0.8676	1.0314	2.3611	1.3108		K00232	E1.3.3.6, ACOX1, ACOX3; acyl-CoA oxidase [EC:1.3.3.6]
Biosynthesis of unsaturated fatty acids
sw00305	sw00305	0.9702	0.7912	1.0436	5.3804		K10251	HSD17B12, KAR, IFA38; 17beta-estradiol 17-dehydrogenase / very-long-chain 3-oxoacyl-CoA reductase [EC:1.1.1.62 1.1.1.330]
sw11269	sw11269	1.2503	1.3072	7.5073	2.2504		K00507	SCD, desC; stearoyl-CoA desaturase (delta-9 desaturase) [EC:1.14.19.1]
sw13636	sw13636	0.7298	1.0654	0.4915	6.2785		K00507	SCD, desC; stearoyl-CoA desaturase (delta-9 desaturase) [EC:1.14.19.1]
sw14804	sw14804	0.8676	1.0314	2.3611	1.3108		K00232	E1.3.3.6, ACOX1, ACOX3; acyl-CoA oxidase [EC:1.3.3.6]
sw18173	sw18173	0.8908	0.842	26.0675	0.7499		K00507	SCD, desC; stearoyl-CoA desaturase (delta-9 desaturase) [EC:1.14.19.1]
sw19113	sw19113	1.567	0.8882	2.3655	1.259		K00059	fabG; 3-oxoacyl-[acyl-carrier protein] reductase [EC:1.1.1.100]
sw20866	sw20866	0.9245	0.7395	0.8339	2.3792		K00507	SCD, desC; stearoyl-CoA desaturase (delta-9 desaturase) [EC:1.14.19.1]
sw22744	sw22744	0.9563	2.2429	1.8065	0.0474		K00507	SCD, desC; stearoyl-CoA desaturase (delta-9 desaturase) [EC:1.14.19.1]

## Sheet: 4-Glycan metabolism
KEGG pathway and Probe	Probe	12 Hat	24 Hat	36 Hat	48 Hat		KEGG ID	Probe KEGG annotation
N-Glycan biosynthesis
sw06984	sw06984	0.9845	1.1824	0.9423	2.7794		K03844	ALG11; alpha-1,2-mannosyltransferase [EC:2.4.1.131]
sw07800	sw07800	1.3966	1.2418	2.7567	5.5641		K05546	GANAB; alpha 1,3-glucosidase [EC:3.2.1.84]
sw07956	sw07956	0.7961	0.813	1.2118	2.4562		K12670	WBP1; oligosaccharyltransferase complex subunit beta
sw13402	sw13402	1.2831	1.1135	0.9807	3.8209		K00729	ALG5; dolichyl-phosphate beta-glucosyltransferase [EC:2.4.1.117]
sw14222	sw14222	0.8343	1.4231	2.4717	0.6367		K00736	MGAT2; alpha-1,6-mannosyl-glycoprotein beta-1,2-N-acetylglucosaminyltransferase [EC:2.4.1.143]
sw14420	sw14420	0.8569	0.9064	1.807	2.4241		K07151	STT3; dolichyl-diphosphooligosaccharide--protein glycosyltransferase [EC:2.4.99.18]
sw15711	sw15711	1.1427	0.9434	0.866	2.2345		K00721	DPM1; dolichol-phosphate mannosyltransferase [EC:2.4.1.83]
sw16055	sw16055	1.0933	0.8977	0.9622	2.6512		K00902	E2.7.1.108; dolichol kinase [EC:2.7.1.108]
sw17492	sw17492	1.181	1.8146	3.4517	14.2958		K01230	MAN1; mannosyl-oligosaccharide alpha-1,2-mannosidase [EC:3.2.1.113]
sw18030	sw18030	1.0289	1.1035	1.3578	2.6276		K07151	STT3; dolichyl-diphosphooligosaccharide--protein glycosyltransferase [EC:2.4.99.18]
sw18931	sw18931	1.2646	1.7024	4.0924	12.7044		K01230	MAN1; mannosyl-oligosaccharide alpha-1,2-mannosidase [EC:3.2.1.113]
Various types of N-glycan biosynthesis
sw06984	sw06984	0.9845	1.1824	0.9423	2.7794		K03844	ALG11; alpha-1,2-mannosyltransferase [EC:2.4.1.131]
sw07956	sw07956	0.7961	0.813	1.2118	2.4562		K07151	STT3; dolichyl-diphosphooligosaccharide--protein glycosyltransferase [EC:2.4.99.18]
sw14222	sw14222	0.8343	1.4231	2.4717	0.6367		K07151	STT3; dolichyl-diphosphooligosaccharide--protein glycosyltransferase [EC:2.4.99.18]
sw14420	sw14420	0.8569	0.9064	1.807	2.4241		K12670	WBP1; oligosaccharyltransferase complex subunit beta
sw17492	sw17492	1.181	1.8146	3.4517	14.2958		K01230	MAN1; mannosyl-oligosaccharide alpha-1,2-mannosidase [EC:3.2.1.113]
sw18030	sw18030	1.0289	1.1035	1.3578	2.6276		K01230	MAN1; mannosyl-oligosaccharide alpha-1,2-mannosidase [EC:3.2.1.113]
sw18931	sw18931	1.2646	1.7024	4.0924	12.7044		K00736	MGAT2; alpha-1,6-mannosyl-glycoprotein beta-1,2-N-acetylglucosaminyltransferase [EC:2.4.1.143]
Mucin type O-glycan biosynthesis
sw14162	sw14162	0.8467	1.3257	2.4805	1.937		K00710	GALNT; polypeptide N-acetylgalactosaminyltransferase [EC:2.4.1.41]
sw20932	sw20932	0.9892	1.1137	2.0248	1.3358		K00710	GALNT; polypeptide N-acetylgalactosaminyltransferase [EC:2.4.1.41]
Glycosaminoglycan biosynthesis - chondroitin sulfate / dermatan sulfate
sw00539	sw00539	1.3336	1.5435	1.2782	7.6591		K00733	B4GALT7; xylosylprotein 4-beta-galactosyltransferase [EC:2.4.1.133]
sw09741	sw09741	1.788	1.9553	1.5339	7.529		K00733	B4GALT7; xylosylprotein 4-beta-galactosyltransferase [EC:2.4.1.133]
Glycosaminoglycan biosynthesis - heparan sulfate / heparin
sw00539	sw00539	1.3336	1.5435	1.2782	7.6591		K00733	B4GALT7; xylosylprotein 4-beta-galactosyltransferase [EC:2.4.1.133]
sw06835	sw06835	1.1572	1.0097	1.0419	4.0669		K00733	B4GALT7; xylosylprotein 4-beta-galactosyltransferase [EC:2.4.1.133]
sw09741	sw09741	1.788	1.9553	1.5339	7.529		K02367	EXT2; glucuronyl/N-acetylglucosaminyl transferase EXT2 [EC:2.4.1.224 2.4.1.225]
sw17680	sw17680	0.9702	1.1802	1.3697	2.009		K02514	HS6ST1; heparan sulfate 6-O-sulfotransferase HS6ST1 [EC:2.8.2.-]
sw20340	sw20340	1.338	1.305	1.1881	2.1277		K08104	HS3ST5; [heparan sulfate]-glucosamine 3-sulfotransferase 5 [EC:2.8.2.23]
Glycosaminoglycan degradation
sw05025	sw05025	1.1842	1.3933	2.1464	7.9901		K12309	GLB1, ELNR1; beta-galactosidase [EC:3.2.1.23]
sw11201	sw11201	1.2752	1.2695	1.7139	9.8709		K01205	NAGLU; alpha-N-acetylglucosaminidase [EC:3.2.1.50]
sw14847	sw14847	0.9906	1.04	3.7333	0.5267		K01135	ARSB; arylsulfatase B [EC:3.1.6.12]
sw15812	sw15812	0.9905	1.1093	1.4955	8.2393		K01137	GNS; N-acetylglucosamine-6-sulfatase [EC:3.1.6.14]
sw18395	sw18395	0.7567	0.9885	1.1594	4.6678		K01137	GNS; N-acetylglucosamine-6-sulfatase [EC:3.1.6.14]
sw18447	sw18447	0.7051	1.0778	1.3574	17.3733		K12373	HEXA_B; hexosaminidase [EC:3.2.1.52]
sw19182	sw19182	0.8424	1.2862	5.408	0.7807		K12373	HEXA_B; hexosaminidase [EC:3.2.1.52]
sw20215	sw20215	0.7352	1.1077	1.3325	43.7749		K12373	HEXA_B; hexosaminidase [EC:3.2.1.52]
sw22618	sw22618	1.3756	1.6053	1.5533	6.6853		K12373	HEXA_B; hexosaminidase [EC:3.2.1.52]
Glycosylphosphatidylinositol(GPI)-anchor biosynthesis
sw05029	sw05029	1.1171	0.8442	0.8137	2.1949		K05290	PIGK; phosphatidylinositol glycan, class K [EC:2.6.-.-]
sw09862	sw09862	1.1472	0.9775	1.0366	2.4596		K05292	PIGT; phosphatidylinositol glycan, class T
Glycosphingolipid biosynthesis - globo series
sw07028	sw07028	2.1098	1.7069	7.033	8.584		K01189	GLA; alpha-galactosidase [EC:3.2.1.22]
sw09747	sw09747	1.3684	1.3891	7.6374	9.2355		K01189	GLA; alpha-galactosidase [EC:3.2.1.22]
sw18447	sw18447	0.7051	1.0778	1.3574	17.3733		K12373	HEXA_B; hexosaminidase [EC:3.2.1.52]
sw19182	sw19182	0.8424	1.2862	5.408	0.7807		K12373	HEXA_B; hexosaminidase [EC:3.2.1.52]
sw20215	sw20215	0.7352	1.1077	1.3325	43.7749		K12373	HEXA_B; hexosaminidase [EC:3.2.1.52]
sw22618	sw22618	1.3756	1.6053	1.5533	6.6853		K12373	HEXA_B; hexosaminidase [EC:3.2.1.52]
Glycosphingolipid biosynthesis - ganglio series
sw05025	sw05025	1.1842	1.3933	2.1464	7.9901		K12309	GLB1, ELNR1; beta-galactosidase [EC:3.2.1.23]
sw18447	sw18447	0.7051	1.0778	1.3574	17.3733		K12373	HEXA_B; hexosaminidase [EC:3.2.1.52]
sw19182	sw19182	0.8424	1.2862	5.408	0.7807		K12373	HEXA_B; hexosaminidase [EC:3.2.1.52]
sw20215	sw20215	0.7352	1.1077	1.3325	43.7749		K12373	HEXA_B; hexosaminidase [EC:3.2.1.52]
sw22618	sw22618	1.3756	1.6053	1.5533	6.6853		K12373	HEXA_B; hexosaminidase [EC:3.2.1.52]
Lipopolysaccharide biosynthesis
sw09038	sw09038	1.4244	1.1783	0.7678	4.4252		K03274	gmhD, rfaD; ADP-L-glycero-D-manno-heptose 6-epimerase [EC:5.1.3.20]
Other glycan degradation
sw05025	sw05025	1.1842	1.3933	2.1464	7.9901		K12309	GLB1, ELNR1; beta-galactosidase [EC:3.2.1.23]
sw07423	sw07423	1.0341	1.0856	0.836	0.4329		K17108	GBA2; non-lysosomal glucosylceramidase [EC:3.2.1.45]
sw11824	sw11824	1.115	0.941	0.9291	2.1364		K01191	E3.2.1.24; alpha-mannosidase [EC:3.2.1.24]
sw15134	sw15134	1.3207	1.7412	3.6265	20.0785		K01206	FUCA; alpha-L-fucosidase [EC:3.2.1.51]
sw15372	sw15372	0.7812	1.1773	1.5781	5.924		K01201	GBA, srfJ; glucosylceramidase [EC:3.2.1.45]
sw18447	sw18447	0.7051	1.0778	1.3574	17.3733		K12373	HEXA_B; hexosaminidase [EC:3.2.1.52]
sw19182	sw19182	0.8424	1.2862	5.408	0.7807		K12373	HEXA_B; hexosaminidase [EC:3.2.1.52]
sw20215	sw20215	0.7352	1.1077	1.3325	43.7749		K12373	HEXA_B; hexosaminidase [EC:3.2.1.52]
sw20948	sw20948	1.1937	1.4281	3.9691	2.6114		K12311	MAN2B1, LAMAN; lysosomal alpha-mannosidase [EC:3.2.1.24]
sw22618	sw22618	1.3756	1.6053	1.5533	6.6853		K12373	HEXA_B; hexosaminidase [EC:3.2.1.52]

## Sheet: 5-Amino acid metabolism
KEGG pathway and Probe	Probe	12 Hat	24 Hat	36 Hat	48 Hat		KEGG ID	Probe KEGG annotation
Alanine, aspartate and glutamate metabolism
sw01800	sw01800	0.7934	0.8942	0.7037	6.5495		K00830	AGXT; alanine-glyoxylate transaminase / serine-glyoxylate transaminase / serine-pyruvate transaminase [EC:2.6.1.44 2.6.1.45 2.6.1.51]
sw03110	sw03110	0.7924	0.7006	0.7099	2.449		K13524	ABAT; 4-aminobutyrate aminotransferase / (S)-3-amino-2-methylpropionate transaminase [EC:2.6.1.19 2.6.1.22]
sw03153	sw03153	0.7958	1.2434	1.2339	3.5002		K01915	glnA; glutamine synthetase [EC:6.3.1.2]
sw06862	sw06862	1.408	0.9058	0.4523	3.572		K01756	purB, ADSL; adenylosuccinate lyase [EC:4.3.2.2]
sw07091	sw07091	0.7796	0.678	0.4047	2.8098		K01915	glnA; glutamine synthetase [EC:6.3.1.2]
sw10674	sw10674	0.8739	1.9873	1.7589	2.6006		K14455	GOT2; aspartate aminotransferase, mitochondrial [EC:2.6.1.1]
sw11016	sw11016	0.8987	0.7547	0.6074	0.2267		K01953	asnB, ASNS; asparagine synthase (glutamine-hydrolysing) [EC:6.3.5.4]
sw12457	sw12457	0.688	1.3343	1.895	0.4465		K00261	GLUD1_2, gdhA; glutamate dehydrogenase (NAD(P)+) [EC:1.4.1.3]
sw12606	sw12606	0.8613	0.7295	0.9503	0.1892		K00294	E1.5.1.12; 1-pyrroline-5-carboxylate dehydrogenase [EC:1.5.1.12]
sw14438	sw14438	0.7954	1.4748	1.8548	2.4792		K14455	GOT2; aspartate aminotransferase, mitochondrial [EC:2.6.1.1]
sw15184	sw15184	1.4119	0.8981	0.8126	10.5666		K01755	argH, ASL; argininosuccinate lyase [EC:4.3.2.1]
sw17865	sw17865	0.9062	0.9754	1.1877	3.3573		K00827	AGXT2; alanine-glyoxylate transaminase / (R)-3-amino-2-methylpropionate-pyruvate transaminase [EC:2.6.1.44 2.6.1.40]
sw21168	sw21168	0.71	0.8369	0.3847	3.1594		K01915	glnA; glutamine synthetase [EC:6.3.1.2]
Glycine, serine and threonine metabolism
sw00132	sw00132	1.0479	1.1632	1.2562	8.7852		K14085	ALDH7A1; aldehyde dehydrogenase family 7 member A1 [EC:1.2.1.31 1.2.1.8 1.2.1.3]
sw00210	sw00210	0.8701	0.9073	1.1177	2.0338		K00058	serA, PHGDH; D-3-phosphoglycerate dehydrogenase [EC:1.1.1.95]
sw00748	sw00748	1.4931	1.4249	1.6117	2.9391		K01754	E4.3.1.19, ilvA, tdcB; threonine dehydratase [EC:4.3.1.19]
sw00993	sw00993	1.2463	1.2651	0.9967	4.4368		K00552	GNMT; glycine N-methyltransferase [EC:2.1.1.20]
sw01800	sw01800	0.7934	0.8942	0.7037	6.5495		K00830	AGXT; alanine-glyoxylate transaminase / serine-glyoxylate transaminase / serine-pyruvate transaminase [EC:2.6.1.44 2.6.1.45 2.6.1.51]
sw03328	sw03328	0.8616	1.3165	1.6718	6.5405		K00600	glyA, SHMT; glycine hydroxymethyltransferase [EC:2.1.2.1]
sw05528	sw05528	0.8363	0.7718	0.986	0.2042		K00108	E1.1.99.1, betA, CHDH; choline dehydrogenase [EC:1.1.99.1]
sw06200	sw06200	1.234	1.0814	1.0828	6.6169		K00552	GNMT; glycine N-methyltransferase [EC:2.1.1.20]
sw07324	sw07324	1.2842	1.2941	1.0885	3.3352		K00831	serC, PSAT1; phosphoserine aminotransferase [EC:2.6.1.52]
sw08471	sw08471	1.5031	1.1745	1.0363	4.4718		K00605	gcvT, AMT; aminomethyltransferase [EC:2.1.2.10]
sw09154	sw09154	1.502	1.5443	1.5451	12.8024		K00108	E1.1.99.1, betA, CHDH; choline dehydrogenase [EC:1.1.99.1]
sw11342	sw11342	0.1592	0.0334	0.611	0.1553		K01697	E4.2.1.22, CBS; cystathionine beta-synthase [EC:4.2.1.22]
sw11858	sw11858	1.2023	1.4239	1.8451	5.7537		K00600	glyA, SHMT; glycine hydroxymethyltransferase [EC:2.1.2.1]
sw12183	sw12183	1.035	1.1137	0.7967	2.6962		K01620	ltaE; threonine aldolase [EC:4.1.2.5]
sw12244	sw12244	1.2981	1.6386	1.9109	8.9992		K00314	SARDH; sarcosine dehydrogenase [EC:1.5.8.3]
sw12651	sw12651	0.9721	0.6411	0.4105	0.0975		K15789	TDH; threonine 3-dehydrogenase [EC:1.1.1.103]
sw13897	sw13897	1.1505	1.1644	0.8903	0.491		K00643	E2.3.1.37, ALAS; 5-aminolevulinate synthase [EC:2.3.1.37]
sw13964	sw13964	1.0117	1.3086	0.9848	2.2544		K01079	serB, PSPH; phosphoserine phosphatase [EC:3.1.3.3]
sw14309	sw14309	0.8735	1.0814	1.4508	5.8782		K00281	GLDC, gcvP; glycine dehydrogenase [EC:1.4.4.2]
sw17865	sw17865	0.9062	0.9754	1.1877	3.3573		K00827	AGXT2; alanine-glyoxylate transaminase / (R)-3-amino-2-methylpropionate-pyruvate transaminase [EC:2.6.1.44 2.6.1.40]
sw18269	sw18269	0.9486	0.8496	0.4029	2.3635		K00108	E1.1.99.1, betA, CHDH; choline dehydrogenase [EC:1.1.99.1]
sw19386	sw19386	1.2053	1.1615	28.1801	0.4833		K00108	E1.1.99.1, betA, CHDH; choline dehydrogenase [EC:1.1.99.1]
sw19567	sw19567	0.8371	1.2294	1.0747	2.2976		K00281	GLDC, gcvP; glycine dehydrogenase [EC:1.4.4.2]
Cysteine and methionine metabolism
sw06580	sw06580	1.3647	1.0819	1.3495	3.4834		K08967	mtnD, mtnZ, ADI1; 1,2-dihydroxy-3-keto-5-methylthiopentene dioxygenase [EC:1.13.11.53 1.13.11.54]
sw07563	sw07563	1.1684	1.0959	1.3557	4.0228		K08967	mtnD, mtnZ, ADI1; 1,2-dihydroxy-3-keto-5-methylthiopentene dioxygenase [EC:1.13.11.53 1.13.11.54]
sw10674	sw10674	0.8739	1.9873	1.7589	2.6006		K14455	GOT2; aspartate aminotransferase, mitochondrial [EC:2.6.1.1]
sw11342	sw11342	0.1592	0.0334	0.611	0.1553		K01697	E4.2.1.22, CBS; cystathionine beta-synthase [EC:4.2.1.22]
sw14229	sw14229	1.2168	0.9406	0.7985	2.2013		K00772	E2.4.2.28, mtaP; 5'-methylthioadenosine phosphorylase [EC:2.4.2.28]
sw14438	sw14438	0.7954	1.4748	1.8548	2.4792		K14455	GOT2; aspartate aminotransferase, mitochondrial [EC:2.6.1.1]
sw18367	sw18367	1.0294	0.9768	0.8713	2.2855		K00802	SMS; spermine synthase [EC:2.5.1.22]
sw18965	sw18965	0.93	0.8417	0.6999	2.1234		K00797	speE, SRM; spermidine synthase [EC:2.5.1.16]
Valine, leucine and isoleucine degradation
sw00132	sw00132	1.0479	1.1632	1.2562	8.7852		K14085	ALDH7A1; aldehyde dehydrogenase family 7 member A1 [EC:1.2.1.31 1.2.1.8 1.2.1.3]
sw01389	sw01389	0.8941	1.0466	0.9082	4.9665		K01968	E6.4.1.4A; 3-methylcrotonyl-CoA carboxylase alpha subunit [EC:6.4.1.4]
sw03110	sw03110	0.7924	0.7006	0.7099	2.449		K13524	ABAT; 4-aminobutyrate aminotransferase / (S)-3-amino-2-methylpropionate transaminase [EC:2.6.1.19 2.6.1.22]
sw03490	sw03490	1.173	1.1373	1.5765	7.7259		K01640	E4.1.3.4, HMGCL, hmgL; hydroxymethylglutaryl-CoA lyase [EC:4.1.3.4]
sw06670	sw06670	0.7113	0.8596	0.6503	3.9197		K09699	E2.3.1.168, bkdB; 2-oxoisovalerate dehydrogenase E2 component (dihydrolipoyl transacylase) [EC:2.3.1.168]
sw07055	sw07055	0.8873	1.2409	3.2533	1.1832		K07509	HADHB; acetyl-CoA acyltransferase [EC:2.3.1.16]
sw07108	sw07108	1.2055	0.9086	0.5778	3.8243		K09699	E2.3.1.168, bkdB; 2-oxoisovalerate dehydrogenase E2 component (dihydrolipoyl transacylase) [EC:2.3.1.168]
sw08292	sw08292	0.8916	0.8989	0.6215	6.8126		K09699	E2.3.1.168, bkdB; 2-oxoisovalerate dehydrogenase E2 component (dihydrolipoyl transacylase) [EC:2.3.1.168]
sw09449	sw09449	0.8498	0.9043	0.7117	2.3025		K09478	ACADSB; short/branched chain acyl-CoA dehydrogenase [EC:1.3.99.12]
sw09712	sw09712	0.9083	1.1353	1.1662	5.3129		K00128	E1.2.1.3; aldehyde dehydrogenase (NAD+) [EC:1.2.1.3]
sw13503	sw13503	0.9744	1.483	2.2496	1.4441		K07509	HADHB; acetyl-CoA acyltransferase [EC:2.3.1.16]
sw13805	sw13805	0.6102	1.0846	0.7819	2.2475		K05607	AUH; methylglutaconyl-CoA hydratase [EC:4.2.1.18]
sw16601	sw16601	0.8846	0.9494	0.7338	3.3891		K09478	ACADSB; short/branched chain acyl-CoA dehydrogenase [EC:1.3.99.12]
sw18275	sw18275	1.2606	1.0651	1.0171	6.3151		K00253	IVD, ivd; isovaleryl-CoA dehydrogenase [EC:1.3.8.4]
sw18525	sw18525	0.8079	0.8846	0.7891	2.7605		K00167	E1.2.4.4B, bkdA2; 2-oxoisovalerate dehydrogenase E1 component, beta subunit [EC:1.2.4.4]
sw18740	sw18740	0.9065	0.7677	0.6868	3.0729		K01027	OXCT; 3-oxoacid CoA-transferase [EC:2.8.3.5]
sw19273	sw19273	1.3203	1.567	0.9805	0.3333		K07508	ACAA2; acetyl-CoA acyltransferase 2 [EC:2.3.1.16]
sw19440	sw19440	1.1531	1.1445	0.9626	5.5366		K07511	ECHS1; enoyl-CoA hydratase [EC:4.2.1.17]
sw20370	sw20370	0.7922	0.8606	1.3571	6.0995		K01968	E6.4.1.4A; 3-methylcrotonyl-CoA carboxylase alpha subunit [EC:6.4.1.4]
sw21913	sw21913	0.7959	0.8219	0.8872	2.5742		K00626	E2.3.1.9, atoB; acetyl-CoA C-acetyltransferase [EC:2.3.1.9]
sw21921	sw21921	0.8701	0.9159	0.9557	3.7203		K00166	E1.2.4.4A, bkdA1; 2-oxoisovalerate dehydrogenase E1 component, alpha subunit [EC:1.2.4.4]
sw22915	sw22915	0.8612	0.7176	0.5688	16.0602		K00626	E2.3.1.9, atoB; acetyl-CoA C-acetyltransferase [EC:2.3.1.9]
sw22938	sw22938	0.7822	1.0165	0.906	4.4898		K00166	E1.2.4.4A, bkdA1; 2-oxoisovalerate dehydrogenase E1 component, alpha subunit [EC:1.2.4.4]
Valine, leucine and isoleucine biosynthesis
sw00748	sw00748	1.4931	1.4249	1.6117	2.9391		K01754	E4.3.1.19, ilvA, tdcB; threonine dehydratase [EC:4.3.1.19]
Lysine biosynthesis
sw00132	sw00132	1.0479	1.1632	1.2562	8.7852		K14085	ALDH7A1; aldehyde dehydrogenase family 7 member A1 [EC:1.2.1.31 1.2.1.8 1.2.1.3]
sw10937	sw10937	0.6898	1.0484	1.7198	0.3931		K01681	ACO, acnA; aconitate hydratase 1 / homoaconitase [EC:4.2.1.3 4.2.1.-]
sw20350	sw20350	1.0561	1.1926	1.8381	0.4681		K01681	ACO, acnA; aconitate hydratase 1 / homoaconitase [EC:4.2.1.3 4.2.1.-]
Lysine degradation
sw00132	sw00132	1.0479	1.1632	1.2562	8.7852		K14085	ALDH7A1; aldehyde dehydrogenase family 7 member A1 [EC:1.2.1.31 1.2.1.8 1.2.1.3]
sw01504	sw01504	0.9854	0.6173	0.601	2.5828		K00471	E1.14.11.1; gamma-butyrobetaine dioxygenase [EC:1.14.11.1]
sw04515	sw04515	1.218	1.156	0.7552	5.4781		K14157	AASS; alpha-aminoadipic semialdehyde synthase [EC:1.5.1.8 1.5.1.9]
sw06702	sw06702	1.0403	0.7962	1.0507	7.6031		K13647	PLODN; procollagen-lysine,2-oxoglutarate 5-dioxygenase, invertebrate [EC:1.14.11.4]
sw08616	sw08616	1.0248	0.9049	0.8228	4.6415		K00252	GCDH, gcdH; glutaryl-CoA dehydrogenase [EC:1.3.8.6]
sw09712	sw09712	0.9083	1.1353	1.1662	5.3129		K00128	E1.2.1.3; aldehyde dehydrogenase (NAD+) [EC:1.2.1.3]
sw10755	sw10755	1.4865	0.9625	0.9508	0.3112		K00164	OGDH, sucA; 2-oxoglutarate dehydrogenase E1 component [EC:1.2.4.2]
sw14977	sw14977	1.0494	0.6388	0.4706	7.5068		K00471	E1.14.11.1; gamma-butyrobetaine dioxygenase [EC:1.14.11.1]
sw15682	sw15682	0.7537	0.7359	1.1178	6.1918		K00473	PLOD1; procollagen-lysine,2-oxoglutarate 5-dioxygenase 1 [EC:1.14.11.4]
sw16993	sw16993	1.5401	0.8555	0.657	9.0163		K14157	AASS; alpha-aminoadipic semialdehyde synthase [EC:1.5.1.8 1.5.1.9]
sw19440	sw19440	1.1531	1.1445	0.9626	5.5366		K07511	ECHS1; enoyl-CoA hydratase [EC:4.2.1.17]
sw20163	sw20163	0.765	1.04	0.7803	3.7737		K14157	AASS; alpha-aminoadipic semialdehyde synthase [EC:1.5.1.8 1.5.1.9]
sw21913	sw21913	0.7959	0.8219	0.8872	2.5742		K00626	E2.3.1.9, atoB; acetyl-CoA C-acetyltransferase [EC:2.3.1.9]
sw22915	sw22915	0.8612	0.7176	0.5688	16.0602		K00626	E2.3.1.9, atoB; acetyl-CoA C-acetyltransferase [EC:2.3.1.9]
Arginine and proline metabolism
sw00132	sw00132	1.0479	1.1632	1.2562	8.7852		K14085	ALDH7A1; aldehyde dehydrogenase family 7 member A1 [EC:1.2.1.31 1.2.1.8 1.2.1.3]
sw01402	sw01402	1.2674	1.0418	2.9307	0.4457		K00934	E2.7.3.3; arginine kinase [EC:2.7.3.3]
sw01949	sw01949	0.9557	0.986	1.4169	4.32		K00472	E1.14.11.2; prolyl 4-hydroxylase [EC:1.14.11.2]
sw02528	sw02528	0.5531	0.4534	0.9977	0.7457		K00819	E2.6.1.13, rocD; ornithine--oxo-acid transaminase [EC:2.6.1.13]
sw03153	sw03153	0.7958	1.2434	1.2339	3.5002		K01915	glnA; glutamine synthetase [EC:6.3.1.2]
sw07091	sw07091	0.7796	0.678	0.4047	2.8098		K01915	glnA; glutamine synthetase [EC:6.3.1.2]
sw09544	sw09544	1.1496	0.8532	0.7041	12.3141		K01476	E3.5.3.1, rocF, arg; arginase [EC:3.5.3.1]
sw09712	sw09712	0.9083	1.1353	1.1662	5.3129		K00128	E1.2.1.3; aldehyde dehydrogenase (NAD+) [EC:1.2.1.3]
sw09946	sw09946	1.5814	1.2508	2.0694	9.9039		K12657	ALDH18A1, P5CS; delta-1-pyrroline-5-carboxylate synthetase [EC:2.7.2.11 1.2.1.41]
sw10674	sw10674	0.8739	1.9873	1.7589	2.6006		K14455	GOT2; aspartate aminotransferase, mitochondrial [EC:2.6.1.1]
sw12457	sw12457	0.688	1.3343	1.895	0.4465		K00261	GLUD1_2, gdhA; glutamate dehydrogenase (NAD(P)+) [EC:1.4.1.3]
sw12606	sw12606	0.8613	0.7295	0.9503	0.1892		K00294	E1.5.1.12; 1-pyrroline-5-carboxylate dehydrogenase [EC:1.5.1.12]
sw14330	sw14330	0.7675	1.4644	1.5958	3.755		K00472	E1.14.11.2; prolyl 4-hydroxylase [EC:1.14.11.2]
sw14438	sw14438	0.7954	1.4748	1.8548	2.4792		K14455	GOT2; aspartate aminotransferase, mitochondrial [EC:2.6.1.1]
sw15184	sw15184	1.4119	0.8981	0.8126	10.5666		K01755	argH, ASL; argininosuccinate lyase [EC:4.3.2.1]
sw18367	sw18367	1.0294	0.9768	0.8713	2.2855		K00802	SMS; spermine synthase [EC:2.5.1.22]
sw18965	sw18965	0.93	0.8417	0.6999	2.1234		K00797	speE, SRM; spermidine synthase [EC:2.5.1.16]
sw21168	sw21168	0.71	0.8369	0.3847	3.1594		K01915	glnA; glutamine synthetase [EC:6.3.1.2]
sw22573	sw22573	0.7278	1.0278	2.1572	0.0835		K14677	ACY1; aminoacylase [EC:3.5.1.14]
Histidine metabolism
sw00132	sw00132	1.0479	1.1632	1.2562	8.7852		K14085	ALDH7A1; aldehyde dehydrogenase family 7 member A1 [EC:1.2.1.31 1.2.1.8 1.2.1.3]
sw09712	sw09712	0.9083	1.1353	1.1662	5.3129		K00128	E1.2.1.3; aldehyde dehydrogenase (NAD+) [EC:1.2.1.3]
sw18911	sw18911	0.6522	1.1798	2.3853	1.1982		K00129	E1.2.1.5; aldehyde dehydrogenase (NAD(P)+) [EC:1.2.1.5]
Tyrosine metabolism
sw01333	sw01333	0.8014	1.1547	0.8088	0.1477		K01555	FAH, fahA; fumarylacetoacetase [EC:3.7.1.2]
sw07607	sw07607	0.9971	1.6208	0.7881	0.0268		K00457	HPD, hppD; 4-hydroxyphenylpyruvate dioxygenase [EC:1.13.11.27]
sw10674	sw10674	0.8739	1.9873	1.7589	2.6006		K14455	GOT2; aspartate aminotransferase, mitochondrial [EC:2.6.1.1]
sw11963	sw11963	0.8686	1.1996	0.8439	0.1142		K00451	HGD, hmgA; homogentisate 1,2-dioxygenase [EC:1.13.11.5]
sw13174	sw13174	1.0387	1.0949	0.893	9.3955		K07253	MIF; phenylpyruvate tautomerase [EC:5.3.2.1]
sw13482	sw13482	0.7783	0.664	0.2307	0.0296		K00501	TH; tyrosine 3-monooxygenase [EC:1.14.16.2]
sw14438	sw14438	0.7954	1.4748	1.8548	2.4792		K14455	GOT2; aspartate aminotransferase, mitochondrial [EC:2.6.1.1]
sw18911	sw18911	0.6522	1.1798	2.3853	1.1982		K00129	E1.2.1.5; aldehyde dehydrogenase (NAD(P)+) [EC:1.2.1.5]
Phenylalanine metabolism
sw01062	sw01062	0.9587	1.1986	1.7345	7.2218		K00500	phhA, PAH; phenylalanine-4-hydroxylase [EC:1.14.16.1]
sw07607	sw07607	0.9971	1.6208	0.7881	0.0268		K00457	HPD, hppD; 4-hydroxyphenylpyruvate dioxygenase [EC:1.13.11.27]
sw10674	sw10674	0.8739	1.9873	1.7589	2.6006		K14455	GOT2; aspartate aminotransferase, mitochondrial [EC:2.6.1.1]
sw13174	sw13174	1.0387	1.0949	0.893	9.3955		K07253	MIF; phenylpyruvate tautomerase [EC:5.3.2.1]
sw14438	sw14438	0.7954	1.4748	1.8548	2.4792		K14455	GOT2; aspartate aminotransferase, mitochondrial [EC:2.6.1.1]
sw18911	sw18911	0.6522	1.1798	2.3853	1.1982		K00129	E1.2.1.5; aldehyde dehydrogenase (NAD(P)+) [EC:1.2.1.5]
Tryptophan metabolism
sw00132	sw00132	1.0479	1.1632	1.2562	8.7852		K14085	ALDH7A1; aldehyde dehydrogenase family 7 member A1 [EC:1.2.1.31 1.2.1.8 1.2.1.3]
sw00689	sw00689	0.6115	0.5942	0.9154	9.3569		K00453	E1.13.11.11, TDO2; tryptophan 2,3-dioxygenase [EC:1.13.11.11]
sw02887	sw02887	1.3078	0.817	0.3336	0.163		K14338	cypD_E, CYP102A2_3; cytochrome P450 / NADPH-cytochrome P450 reductase [EC:1.14.14.1 1.6.2.4]
sw03619	sw03619	1.4177	1.9693	1.625	2.7031		K03781	katE, CAT, catB, srpA; catalase [EC:1.11.1.6]
sw08616	sw08616	1.0248	0.9049	0.8228	4.6415		K00252	GCDH, gcdH; glutaryl-CoA dehydrogenase [EC:1.3.8.6]
sw09629	sw09629	1.0125	0.9214	0.4312	6.6441		K00486	KMO; kynurenine 3-monooxygenase [EC:1.14.13.9]
sw09712	sw09712	0.9083	1.1353	1.1662	5.3129		K00128	E1.2.1.3; aldehyde dehydrogenase (NAD+) [EC:1.2.1.3]
sw10126	sw10126	0.7244	0.9864	0.8607	4.6182		K00816	CCBL; kynurenine---oxoglutarate transaminase / cysteine-S-conjugate beta-lyase / glutamine---phenylpyruvate transaminase [EC:2.6.1.7 4.4.1.13 2.6.1.64]
sw10755	sw10755	1.4865	0.9625	0.9508	0.3112		K00164	OGDH, sucA; 2-oxoglutarate dehydrogenase E1 component [EC:1.2.4.2]
sw12156	sw12156	0.7713	0.7643	0.8318	4.8162		K00816	CCBL; kynurenine---oxoglutarate transaminase / cysteine-S-conjugate beta-lyase / glutamine---phenylpyruvate transaminase [EC:2.6.1.7 4.4.1.13 2.6.1.64]
sw18242	sw18242	0.8151	0.9792	1.014	4.1622		K00816	CCBL; kynurenine---oxoglutarate transaminase / cysteine-S-conjugate beta-lyase / glutamine---phenylpyruvate transaminase [EC:2.6.1.7 4.4.1.13 2.6.1.64]
sw19440	sw19440	1.1531	1.1445	0.9626	5.5366		K07511	ECHS1; enoyl-CoA hydratase [EC:4.2.1.17]
sw21913	sw21913	0.7959	0.8219	0.8872	2.5742		K00626	E2.3.1.9, atoB; acetyl-CoA C-acetyltransferase [EC:2.3.1.9]
sw22291	sw22291	0.9606	1.0693	0.6233	3.7554		K00669	AANAT; arylalkylamine N-acetyltransferase [EC:2.3.1.87]
sw22405	sw22405	1.0782	1.0484	1.1501	2.8536		K00816	CCBL; kynurenine---oxoglutarate transaminase / cysteine-S-conjugate beta-lyase / glutamine---phenylpyruvate transaminase [EC:2.6.1.7 4.4.1.13 2.6.1.64]
sw22810	sw22810	1.0417	0.9985	0.8869	4.2424		K00816	CCBL; kynurenine---oxoglutarate transaminase / cysteine-S-conjugate beta-lyase / glutamine---phenylpyruvate transaminase [EC:2.6.1.7 4.4.1.13 2.6.1.64]
sw22915	sw22915	0.8612	0.7176	0.5688	16.0602		K00626	E2.3.1.9, atoB; acetyl-CoA C-acetyltransferase [EC:2.3.1.9]
Phenylalanine, tyrosine and tryptophan biosynthesis
sw10674	sw10674	0.8739	1.9873	1.7589	2.6006		K14455	GOT2; aspartate aminotransferase, mitochondrial [EC:2.6.1.1]
sw14438	sw14438	0.7954	1.4748	1.8548	2.4792		K14455	GOT2; aspartate aminotransferase, mitochondrial [EC:2.6.1.1]
sw01062	sw01062	0.9587	1.1986	1.7345	7.2218		K00500	phhA, PAH; phenylalanine-4-hydroxylase [EC:1.14.16.1]
beta-Alanine metabolism
sw00132	sw00132	1.0479	1.1632	1.2562	8.7852		K14085	ALDH7A1; aldehyde dehydrogenase family 7 member A1 [EC:1.2.1.31 1.2.1.8 1.2.1.3]
sw02334	sw02334	0.9513	1.0008	1.1147	5.3254		K00207	E1.3.1.2, DPYD; dihydropyrimidine dehydrogenase (NADP+) [EC:1.3.1.2]
sw03110	sw03110	0.7924	0.7006	0.7099	2.449		K13524	ABAT; 4-aminobutyrate aminotransferase / (S)-3-amino-2-methylpropionate transaminase [EC:2.6.1.19 2.6.1.22]
sw09712	sw09712	0.9083	1.1353	1.1662	5.3129		K00128	E1.2.1.3; aldehyde dehydrogenase (NAD+) [EC:1.2.1.3]
sw14040	sw14040	1.2104	0.9915	0.8882	2.7285		K01431	E3.5.1.6; beta-ureidopropionase [EC:3.5.1.6]
sw18367	sw18367	1.0294	0.9768	0.8713	2.2855		K00802	SMS; spermine synthase [EC:2.5.1.22]
sw18478	sw18478	0.9143	1.3646	1.2893	4.3501		K00207	E1.3.1.2, DPYD; dihydropyrimidine dehydrogenase (NADP+) [EC:1.3.1.2]
sw18510	sw18510	1.0637	1.3836	1.6042	5.1991		K00207	E1.3.1.2, DPYD; dihydropyrimidine dehydrogenase (NADP+) [EC:1.3.1.2]
sw18911	sw18911	0.6522	1.1798	2.3853	1.1982		K00129	E1.2.1.5; aldehyde dehydrogenase (NAD(P)+) [EC:1.2.1.5]
sw18965	sw18965	0.93	0.8417	0.6999	2.1234		K00797	speE, SRM; spermidine synthase [EC:2.5.1.16]
sw19440	sw19440	1.1531	1.1445	0.9626	5.5366		K07511	ECHS1; enoyl-CoA hydratase [EC:4.2.1.17]
sw20520	sw20520	1.3534	1.3687	1.9853	4.2753		K00207	E1.3.1.2, DPYD; dihydropyrimidine dehydrogenase (NADP+) [EC:1.3.1.2]
Taurine and hypotaurine metabolism
sw02154	sw02154	0.7993	0.9776	1.2137	7.1153		K00681	ggt; gamma-glutamyltranspeptidase [EC:2.3.2.2]
Phosphonate and phosphinate metabolism
sw20548	sw20548	0.9258	1.1194	0.4738	2.3153		K00119	E1.1.99.-; [EC:1.1.99.-]
sw21299	sw21299	0.9214	0.9655	0.9579	7.9078		K00993	EPT1; ethanolaminephosphotransferase [EC:2.7.8.1]
Selenocompound metabolism
sw10126	sw10126	0.7244	0.9864	0.8607	4.6182		K00816	CCBL; kynurenine---oxoglutarate transaminase / cysteine-S-conjugate beta-lyase / glutamine---phenylpyruvate transaminase [EC:2.6.1.7 4.4.1.13 2.6.1.64]
sw12156	sw12156	0.7713	0.7643	0.8318	4.8162		K00816	CCBL; kynurenine---oxoglutarate transaminase / cysteine-S-conjugate beta-lyase / glutamine---phenylpyruvate transaminase [EC:2.6.1.7 4.4.1.13 2.6.1.64]
sw18242	sw18242	0.8151	0.9792	1.014	4.1622		K00816	CCBL; kynurenine---oxoglutarate transaminase / cysteine-S-conjugate beta-lyase / glutamine---phenylpyruvate transaminase [EC:2.6.1.7 4.4.1.13 2.6.1.64]
sw22405	sw22405	1.0782	1.0484	1.1501	2.8536		K00816	CCBL; kynurenine---oxoglutarate transaminase / cysteine-S-conjugate beta-lyase / glutamine---phenylpyruvate transaminase [EC:2.6.1.7 4.4.1.13 2.6.1.64]
sw22810	sw22810	1.0417	0.9985	0.8869	4.2424		K00816	CCBL; kynurenine---oxoglutarate transaminase / cysteine-S-conjugate beta-lyase / glutamine---phenylpyruvate transaminase [EC:2.6.1.7 4.4.1.13 2.6.1.64]
Cyanoamino acid metabolism
sw02154	sw02154	0.7993	0.9776	1.2137	7.1153		K00681	ggt; gamma-glutamyltranspeptidase [EC:2.3.2.2]
sw03328	sw03328	0.8616	1.3165	1.6718	6.5405		K00600	glyA, SHMT; glycine hydroxymethyltransferase [EC:2.1.2.1]
sw04028	sw04028	1.2477	0.7633	0.8938	2.3849		K01188	E3.2.1.21; beta-glucosidase [EC:3.2.1.21]
sw11637	sw11637	1.8764	2.4207	4.1283	5.9247		K01188	E3.2.1.21; beta-glucosidase [EC:3.2.1.21]
sw11858	sw11858	1.2023	1.4239	1.8451	5.7537		K00600	glyA, SHMT; glycine hydroxymethyltransferase [EC:2.1.2.1]
sw19262	sw19262	1.9308	1.3749	2.2479	1.3034		K01188	E3.2.1.21; beta-glucosidase [EC:3.2.1.21]
D-Glutamine and D-glutamate metabolism
sw12457	sw12457	0.688	1.3343	1.895	0.4465		K00261	GLUD1_2, gdhA; glutamate dehydrogenase (NAD(P)+) [EC:1.4.1.3]
Glutathione metabolism
sw01471	sw01471	1.0405	1.1266	0.9077	3.5241		K00033	E1.1.1.44, PGD, gnd; 6-phosphogluconate dehydrogenase [EC:1.1.1.44]
sw01658	sw01658	1.1245	1.3511	5.7497	1.2782		K11140	ANPEP; aminopeptidase N [EC:3.4.11.2]
sw02154	sw02154	0.7993	0.9776	1.2137	7.1153		K00681	ggt; gamma-glutamyltranspeptidase [EC:2.3.2.2]
sw02205	sw02205	0.8611	0.8556	0.6645	0.1679		K00799	GST, gst; glutathione S-transferase [EC:2.5.1.18]
sw04795	sw04795	0.7215	0.7515	0.8924	2.58		K10808	RRM2; ribonucleoside-diphosphate reductase subunit M2 [EC:1.17.4.1]
sw06329	sw06329	0.9377	1.302	1.3004	3.067		K00031	IDH1, IDH2, icd; isocitrate dehydrogenase [EC:1.1.1.42]
sw07356	sw07356	1.1727	1.0006	1.1508	2.4584		K10807	RRM1; ribonucleoside-diphosphate reductase subunit M1 [EC:1.17.4.1]
sw13043	sw13043	1.3503	0.8664	0.63	6.362		K00799	GST, gst; glutathione S-transferase [EC:2.5.1.18]
sw13395	sw13395	0.8842	0.8957	1.2011	3.4882		K00799	GST, gst; glutathione S-transferase [EC:2.5.1.18]
sw15127	sw15127	0.7716	0.9868	0.8307	0.1279		K00799	GST, gst; glutathione S-transferase [EC:2.5.1.18]
sw15474	sw15474	1.0693	1.2065	0.9989	0.0853		K00799	GST, gst; glutathione S-transferase [EC:2.5.1.18]
sw16520	sw16520	1.5216	1.125	2.3464	1.4648		K11140	ANPEP; aminopeptidase N [EC:3.4.11.2]
sw18367	sw18367	1.0294	0.9768	0.8713	2.2855		K00802	SMS; spermine synthase [EC:2.5.1.22]
sw18965	sw18965	0.93	0.8417	0.6999	2.1234		K00797	speE, SRM; spermidine synthase [EC:2.5.1.16]

## Sheet: 6-Nucleotide metabolism
KEGG pathway and Probe	Probe	12 Hat	24 Hat	36 Hat	48 Hat		KEGG ID	Probe KEGG annotation
Purine metabolism
sw00365	sw00365	0.9109	1.0693	1.4063	5.3138		K01952	purL, PFAS; phosphoribosylformylglycinamidine synthase [EC:6.3.5.3]
sw00791	sw00791	0.7134	0.7996	0.9134	2.1848		K01081	E3.1.3.5; 5'-nucleotidase [EC:3.1.3.5]
sw01149	sw01149	1.3374	1.1714	1.194	0.3595		K00939	E2.7.4.3, adk; adenylate kinase [EC:2.7.4.3]
sw01725	sw01725	0.9473	0.9262	0.9096	3.3698		K01466	allB; allantoinase [EC:3.5.2.5]
sw02311	sw02311	0.7973	1.3601	1.0332	0.462		K00962	pnp, PNPT1; polyribonucleotide nucleotidyltransferase [EC:2.7.7.8]
sw04154	sw04154	1.0168	1.2291	1.3942	11.9504		K00948	PRPS, prsA; ribose-phosphate pyrophosphokinase [EC:2.7.6.1]
sw04795	sw04795	0.7215	0.7515	0.8924	2.58		K10808	RRM2; ribonucleoside-diphosphate reductase subunit M2 [EC:1.17.4.1]
sw06862	sw06862	1.408	0.9058	0.4523	3.572		K01756	purB, ADSL; adenylosuccinate lyase [EC:4.3.2.2]
sw07356	sw07356	1.1727	1.0006	1.1508	2.4584		K10807	RRM1; ribonucleoside-diphosphate reductase subunit M1 [EC:1.17.4.1]
sw08108	sw08108	1.536	3.0434	1.4416	10.0271		K00365	E1.7.3.3; urate oxidase [EC:1.7.3.3]
sw08784	sw08784	1.3395	1.2952	1.1414	7.5784		K00106	XDH; xanthine dehydrogenase/oxidase [EC:1.17.1.4 1.17.3.2]
sw09405	sw09405	0.5045	0.5904	0.5375	2.0648		K03783	punA; purine-nucleoside phosphorylase [EC:2.4.2.1]
sw10102	sw10102	1.0126	0.9874	1.1186	2.5506		K01587	PAICS; phosphoribosylaminoimidazole carboxylase / phosphoribosylaminoimidazole-succinocarboxamide synthase [EC:4.1.1.21 6.3.2.6]
sw11493	sw11493	1.2449	1.2094	2.1178	2.06		K13755	PDE1; calcium/calmodulin-dependent 3',5'-cyclic nucleotide phosphodiesterase [EC:3.1.4.17]
sw17399	sw17399	0.8081	1.1011	0.9849	2.1645		K01587	PAICS; phosphoribosylaminoimidazole carboxylase / phosphoribosylaminoimidazole-succinocarboxamide synthase [EC:4.1.1.21 6.3.2.6]
sw17679	sw17679	1.0952	1.0564	1.6336	2.9425		K01835	pgm; phosphoglucomutase [EC:5.4.2.2]
sw17859	sw17859	0.8151	1.1945	1.5946	2.6772		K01835	pgm; phosphoglucomutase [EC:5.4.2.2]
sw18903	sw18903	1.022	1.2974	3.8571	6.6214		K00602	purH; phosphoribosylaminoimidazolecarboxamide formyltransferase / IMP cyclohydrolase [EC:2.1.2.3 3.5.4.10]
sw21035	sw21035	1.0699	0.9064	1.2381	4.722		K01081	E3.1.3.5; 5'-nucleotidase [EC:3.1.3.5]
sw21271	sw21271	1.3545	1.3778	2.1404	16.4713		K01081	E3.1.3.5; 5'-nucleotidase [EC:3.1.3.5]
sw22892	sw22892	0.7277	1.1228	1.9009	2.2039		K00873	PK, pyk; pyruvate kinase [EC:2.7.1.40]
Pyrimidine metabolism
sw00791	sw00791	0.7134	0.7996	0.9134	2.1848		K01081	E3.1.3.5; 5'-nucleotidase [EC:3.1.3.5]
sw02311	sw02311	0.7973	1.3601	1.0332	0.462		K00962	pnp, PNPT1; polyribonucleotide nucleotidyltransferase [EC:2.7.7.8]
sw02334	sw02334	0.9513	1.0008	1.1147	5.3254		K00207	E1.3.1.2, DPYD; dihydropyrimidine dehydrogenase (NADP+) [EC:1.3.1.2]
sw04795	sw04795	0.7215	0.7515	0.8924	2.58		K10808	RRM2; ribonucleoside-diphosphate reductase subunit M2 [EC:1.17.4.1]
sw07356	sw07356	1.1727	1.0006	1.1508	2.4584		K10807	RRM1; ribonucleoside-diphosphate reductase subunit M1 [EC:1.17.4.1]
sw09405	sw09405	0.5045	0.5904	0.5375	2.0648		K03783	punA; purine-nucleoside phosphorylase [EC:2.4.2.1]
sw14040	sw14040	1.2104	0.9915	0.8882	2.7285		K01431	E3.5.1.6; beta-ureidopropionase [EC:3.5.1.6]
sw18478	sw18478	0.9143	1.3646	1.2893	4.3501		K00207	E1.3.1.2, DPYD; dihydropyrimidine dehydrogenase (NADP+) [EC:1.3.1.2]
sw18510	sw18510	1.0637	1.3836	1.6042	5.1991		K00207	E1.3.1.2, DPYD; dihydropyrimidine dehydrogenase (NADP+) [EC:1.3.1.2]
sw20520	sw20520	1.3534	1.3687	1.9853	4.2753		K00207	E1.3.1.2, DPYD; dihydropyrimidine dehydrogenase (NADP+) [EC:1.3.1.2]
sw21035	sw21035	1.0699	0.9064	1.2381	4.722		K01081	E3.1.3.5; 5'-nucleotidase [EC:3.1.3.5]
sw21271	sw21271	1.3545	1.3778	2.1404	16.4713		K01081	E3.1.3.5; 5'-nucleotidase [EC:3.1.3.5]

## Sheet: 7-Protein processing
KEGG pathway and Probe	Probe	12 Hat	24 Hat	36 Hat	48 Hat		KEGG ID	Probe KEGG annotation
Protein export
sw00907	sw00907	0.9789	1.219	1.1934	2.2389		K13431	SRPR; signal recognition particle receptor subunit alpha
sw07544	sw07544	1.2249	0.9781	0.7471	2.6717		K07342	SEC61G, SSS1, secE; protein transport protein SEC61 subunit gamma and related proteins
sw07925	sw07925	1.1687	1.0358	1.1916	2.6716		K12947	SPCS2, SPC2; signal peptidase complex subunit 2 [EC:3.4.-.-]
sw08198	sw08198	0.8522	0.8903	1.4494	5.5163		K09490	HSPA5, BIP; heat shock 70kDa protein 5
sw13452	sw13452	0.7195	0.865	1.2434	2.0454		K10956	SEC61A; protein transport protein SEC61 subunit alpha
sw15643	sw15643	1.0421	0.8634	0.7053	3.8651		K03106	SRP54, ffh; signal recognition particle subunit SRP54
sw18957	sw18957	0.8727	1.2403	2.3046	1.8376		K09540	SEC63; translocation protein SEC63
sw22190	sw22190	1.2549	0.9819	3.3696	0.0788		K09540	SEC63; translocation protein SEC63
Protein processing in endoplasmic reticulum
sw00464	sw00464	1.0265	1.4542	1.7368	2.0546		K13525	VCP, CDC48; transitional endoplasmic reticulum ATPase
sw01668	sw01668	0.7836	1.7745	4.0313	5.195		K09487	HSP90B, TRA1; heat shock protein 90kDa beta
sw01883	sw01883	0.7893	0.9282	0.776	2.6223		K11519	DERL1; Derlin-1
sw03436	sw03436	1.3792	1.4952	2.1681	2.8234		K10601	SYVN1, HRD1; E3 ubiquitin-protein ligase synoviolin [EC:6.3.2.19]
sw03612	sw03612	0.85	0.9997	1.3897	4.38		K08056	PDIA3, GRP58; protein disulfide isomerase family A, member 3 [EC:5.3.4.1]
sw03654	sw03654	1.0365	0.8246	0.8809	4.0313		K09517	DNAJB11; DnaJ homolog subfamily B member 11
sw03872	sw03872	0.9331	0.9033	0.7748	3.211		K13251	SSR3; translocon-associated protein subunit gamma
sw03906	sw03906	0.855	0.9482	1.0817	0.3848		K06689	UBE2D_E, UBC4, UBC5; ubiquitin-conjugating enzyme E2 D/E [EC:6.3.2.19]
sw05107	sw05107	1.4924	0.7165	0.7931	0.0738		K09541	CRYAA; crystallin, alpha A
sw07544	sw07544	1.2249	0.9781	0.7471	2.6717		K07342	SEC61G, SSS1, secE; protein transport protein SEC61 subunit gamma and related proteins
sw07800	sw07800	1.3966	1.2418	2.7567	5.5641		K05546	GANAB; alpha 1,3-glucosidase [EC:3.2.1.84]
sw07877	sw07877	0.9143	1.2337	2.0392	1.8341		K13525	VCP, CDC48; transitional endoplasmic reticulum ATPase
sw07956	sw07956	0.7961	0.813	1.2118	2.4562		K12670	WBP1; oligosaccharyltransferase complex subunit beta
sw08198	sw08198	0.8522	0.8903	1.4494	5.5163		K09490	HSPA5, BIP; heat shock 70kDa protein 5
sw08383	sw08383	0.9015	0.9353	1.0657	3.0887		K09584	PDIA6, TXNDC7; protein disulfide-isomerase A6 [EC:5.3.4.1]
sw09674	sw09674	0.8607	0.8595	1.1247	3.9254		K13249	SSR1; translocon-associated protein subunit alpha
sw09820	sw09820	0.9593	1.3793	2.5151	2.4275		K09487	HSP90B, TRA1; heat shock protein 90kDa beta
sw10693	sw10693	0.857	0.7917	0.8617	2.0183		K14008	ERLEC1, XTP3B; endoplasmic reticulum lectin 1
sw10891	sw10891	0.854	0.8218	1.1565	3.7622		K13250	SSR2; translocon-associated protein subunit beta
sw12517	sw12517	0.994	1.0091	1.9821	2.2963		K08057	CALR; calreticulin
sw13075	sw13075	0.6555	0.8565	0.8773	2.0491		K14010	TRAM1; translocating chain-associated membrane protein 1
sw13452	sw13452	0.7195	0.865	1.2434	2.0454		K10956	SEC61A; protein transport protein SEC61 subunit alpha
sw14074	sw14074	0.8883	1.0598	1.1503	3.1264		K09580	PDIA1, P4HB; protein disulfide-isomerase A1 [EC:5.3.4.1]
sw14420	sw14420	0.8569	0.9064	1.807	2.4241		K07151	STT3; dolichyl-diphosphooligosaccharide--protein glycosyltransferase [EC:2.4.99.18]
sw14915	sw14915	0.5804	1.1451	2.5114	1.4335		K13525	VCP, CDC48; transitional endoplasmic reticulum ATPase
sw15024	sw15024	1.1832	0.9744	1.4119	2.9546		K10086	EDEM3; ER degradation enhancer, mannosidase alpha-like 3
sw15222	sw15222	0.9236	1.0057	1.3007	3.4772		K08288	PRKCSH; protein kinase C substrate 80K-H
sw15752	sw15752	1.2206	1.0948	1.1164	3.4007		K08288	PRKCSH; protein kinase C substrate 80K-H
sw16039	sw16039	0.8568	1.2268	1.7536	3.6172		K08056	PDIA3, GRP58; protein disulfide isomerase family A, member 3 [EC:5.3.4.1]
sw16184	sw16184	1.0346	1.1488	1.698	4.5173		K09486	HYOU1; hypoxia up-regulated 1
sw17492	sw17492	1.181	1.8146	3.4517	14.2958		K01230	MAN1; mannosyl-oligosaccharide alpha-1,2-mannosidase [EC:3.2.1.113]
sw17977	sw17977	0.7899	1.0237	1.2919	2.0162		K09523	DNAJC3; DnaJ homolog subfamily C member 3
sw18030	sw18030	1.0289	1.1035	1.3578	2.6276		K07151	STT3; dolichyl-diphosphooligosaccharide--protein glycosyltransferase [EC:2.4.99.18]
sw18662	sw18662	0.7791	0.8679	0.953	0.4929		K10575	UBE2G1, UBC7; ubiquitin-conjugating enzyme E2 G1 [EC:6.3.2.19]
sw18898	sw18898	3.1122	0.7428	1.0088	0.5482		K09542	CRYAB; crystallin, alpha B
sw18931	sw18931	1.2646	1.7024	4.0924	12.7044		K01230	MAN1; mannosyl-oligosaccharide alpha-1,2-mannosidase [EC:3.2.1.113]
sw18957	sw18957	0.8727	1.2403	2.3046	1.8376		K09540	SEC63; translocation protein SEC63
sw19096	sw19096	0.6806	1.1576	1.7815	2.0092		K10080	LMAN1, ERGIC53; lectin, mannose-binding 1
sw20098	sw20098	1.1744	1.9359	1.5475	0.1048		K09542	CRYAB; crystallin, alpha B
sw22190	sw22190	1.2549	0.9819	3.3696	0.0788		K09540	SEC63; translocation protein SEC63
sw22585	sw22585	2.3196	1.4118	0.9396	0.0818		K03283	HSPA1_8; heat shock 70kDa protein 1/8
Ubiquitin mediated proteolysis
sw03436	sw03436	1.3792	1.4952	2.1681	2.8234		K10601	SYVN1, HRD1; E3 ubiquitin-protein ligase synoviolin [EC:6.3.2.19]
sw03906	sw03906	0.855	0.9482	1.0817	0.3848		K06689	UBE2D_E, UBC4, UBC5; ubiquitin-conjugating enzyme E2 D/E [EC:6.3.2.19]
sw08652	sw08652	1.2135	1.3608	1.0279	3.2073		K05633	AIP5, WWP1; atrophin-1 interacting protein 5 (WW domain containing E3 ubiquitin protein ligase 1) [EC:6.3.2.19]
sw16374	sw16374	0.9153	1.7125	2.4198	1.2659		K03362	FBXW1_11, BTRC, beta-TRCP; F-box and WD-40 domain protein 1/11
sw16552	sw16552	1.8128	1.7584	1.4189	20.2352		K10595	HERC2; E3 ubiquitin-protein ligase HERC2 [EC:6.3.2.19]
sw18662	sw18662	0.7791	0.8679	0.953	0.4929		K10575	UBE2G1, UBC7; ubiquitin-conjugating enzyme E2 G1 [EC:6.3.2.19]
sw20360	sw20360	0.8914	0.7643	0.8322	2.4236		K10610	DDB1; DNA damage-binding protein 1
sw22890	sw22890	1.0967	0.8694	0.998	0.432		K04725	XIAP, BIRC4; E3 ubiquitin-protein ligase XIAP
Proteasome
sw04021	sw04021	1.3744	1.2252	2.261	1.5962		K03028	PSMD2, RPN1; 26S proteasome regulatory subunit N1
sw01587	sw01587	1.3694	1.4239	1.1826	2.0293		K03032	PSMD1, RPN2; 26S proteasome regulatory subunit N2
Lysosome
sw00887	sw00887	1.2546	1.1302	1.2275	5.4185		K13443	NPC2; Niemann-Pick C2 protein
sw03915	sw03915	1.2229	1.291	1.7534	11.1115		K01074	PPT; palmitoyl-protein thioesterase [EC:3.1.2.22]
sw04026	sw04026	0.1348	0.2604	0.4901	1.1525		K02154	ATPeVI, ATP6N1A; V-type H+-transporting ATPase subunit I [EC:3.6.3.14]
sw04192	sw04192	0.818	0.7779	0.6011	4.3957		K13289	CTSA; cathepsin A (carboxypeptidase C) [EC:3.4.16.5]
sw04363	sw04363	0.6512	1.1125	1.0104	0.2881		K12397	AP3B; AP-3 complex subunit beta
sw05025	sw05025	1.1842	1.3933	2.1464	7.9901		K12309	GLB1, ELNR1; beta-galactosidase [EC:3.2.1.23]
sw06076	sw06076	1.0295	1.0981	1.7376	4.0734		K12350	SMPD1, ASM; sphingomyelin phosphodiesterase [EC:3.1.4.12]
sw07028	sw07028	2.1098	1.7069	7.033	8.584		K01189	GLA; alpha-galactosidase [EC:3.2.1.22]
sw07674	sw07674	0.4649	0.4387	0.9958	0.8516		K02155	ATPeVPL, ATP6L; V-type H+-transporting ATPase 16kDa proteolipid subunit [EC:3.6.3.14]
sw09128	sw09128	0.1805	0.1737	0.3606	0.9897		K02154	ATPeVI, ATP6N1A; V-type H+-transporting ATPase subunit I [EC:3.6.3.14]
sw09511	sw09511	0.2937	0.1774	0.5116	1.0322		K02154	ATPeVI, ATP6N1A; V-type H+-transporting ATPase subunit I [EC:3.6.3.14]
sw09747	sw09747	1.3684	1.3891	7.6374	9.2355		K01189	GLA; alpha-galactosidase [EC:3.2.1.22]
sw09888	sw09888	0.4311	0.5661	0.8316	0.6518		K02146	ATPeVAC39, ATP6D; V-type H+-transporting ATPase subunit AC39 [EC:3.6.3.14]
sw11201	sw11201	1.2752	1.2695	1.7139	9.8709		K01205	NAGLU; alpha-N-acetylglucosaminidase [EC:3.2.1.50]
sw11619	sw11619	0.8343	0.6607	1.8438	4.619		K13443	NPC2; Niemann-Pick C2 protein
sw11624	sw11624	0.67	1.1396	2.1034	4.3475		K12350	SMPD1, ASM; sphingomyelin phosphodiesterase [EC:3.1.4.12]
sw11819	sw11819	1.2698	1.4488	3.1089	4.1638		K01379	CTSD; cathepsin D [EC:3.4.23.5]
sw12347	sw12347	1.3202	1.1595	2.0187	15.111		K01363	CTSB; cathepsin B [EC:3.4.22.1]
sw14397	sw14397	0.5403	0.4871	0.9046	1.1714		K03661	ATPeVPF, ATP6F; V-type H+-transporting ATPase 21kDa proteolipid subunit [EC:3.6.3.14]
sw14648	sw14648	0.8663	1.0177	1.9929	3.6945		K12382	PSAP, SGP1; saposin
sw14847	sw14847	0.9906	1.04	3.7333	0.5267		K01135	ARSB; arylsulfatase B [EC:3.1.6.12]
sw15372	sw15372	0.7812	1.1773	1.5781	5.924		K01201	GBA, srfJ; glucosylceramidase [EC:3.2.1.45]
sw15812	sw15812	0.9905	1.1093	1.4955	8.2393		K01137	GNS; N-acetylglucosamine-6-sulfatase [EC:3.1.6.14]
sw18395	sw18395	0.7567	0.9885	1.1594	4.6678		K01137	GNS; N-acetylglucosamine-6-sulfatase [EC:3.1.6.14]
sw18447	sw18447	0.7051	1.0778	1.3574	17.3733		K12373	HEXA_B; hexosaminidase [EC:3.2.1.52]
sw19182	sw19182	0.8424	1.2862	5.408	0.7807		K12373	HEXA_B; hexosaminidase [EC:3.2.1.52]
sw19810	sw19810	1.201	1.0459	1.4679	3.7397		K12382	PSAP, SGP1; saposin
sw20123	sw20123	0.8106	0.7386	1.428	2.1801		K01373	CTSF; cathepsin F [EC:3.4.22.41]
sw20215	sw20215	0.7352	1.1077	1.3325	43.7749		K12373	HEXA_B; hexosaminidase [EC:3.2.1.52]
sw20948	sw20948	1.1937	1.4281	3.9691	2.6114		K12311	MAN2B1, LAMAN; lysosomal alpha-mannosidase [EC:3.2.1.24]
sw21938	sw21938	0.5659	0.4888	1.0303	0.7864		K02144	ATPeV54kD; V-type H+-transporting ATPase 54 kD subunit [EC:3.6.3.14]
sw22618	sw22618	1.3756	1.6053	1.5533	6.6853		K12373	HEXA_B; hexosaminidase [EC:3.2.1.52]
Peroxisome
sw00457	sw00457	1.2228	1.3074	1.312	2.1181		K13347	PXMP2, PMP22; peroxisomal membrane protein 2
sw01800	sw01800	0.7934	0.8942	0.7037	6.5495		K00830	AGXT; alanine-glyoxylate transaminase / serine-glyoxylate transaminase / serine-pyruvate transaminase [EC:2.6.1.44 2.6.1.45 2.6.1.51]
sw03490	sw03490	1.173	1.1373	1.5765	7.7259		K01640	E4.1.3.4, HMGCL, hmgL; hydroxymethylglutaryl-CoA lyase [EC:4.1.3.4]
sw03619	sw03619	1.4177	1.9693	1.625	2.7031		K03781	katE, CAT, catB, srpA; catalase [EC:1.11.1.6]
sw06329	sw06329	0.9377	1.302	1.3004	3.067		K00031	IDH1, IDH2, icd; isocitrate dehydrogenase [EC:1.1.1.42]
sw08784	sw08784	1.3395	1.2952	1.1414	7.5784		K00106	XDH; xanthine dehydrogenase/oxidase [EC:1.17.1.4 1.17.3.2]
sw09099	sw09099	2.0187	2.323	2.5897	8.3419		K13356	FAR; fatty acyl-CoA reductase [EC:1.2.1.-]
sw09186	sw09186	0.8733	0.5212	0.6335	2.7622		K00477	E1.14.11.18, PHYH; phytanoyl-CoA hydroxylase [EC:1.14.11.18]
sw09451	sw09451	1.3681	0.965	0.6807	4.5545		K11517	HAO; (S)-2-hydroxy-acid oxidase [EC:1.1.3.15]
sw14555	sw14555	0.9602	1.1396	0.9395	0.2818		K04565	SOD1; superoxide dismutase, Cu-Zn family [EC:1.15.1.1]
sw14804	sw14804	0.8676	1.0314	2.3611	1.3108		K00232	E1.3.3.6, ACOX1, ACOX3; acyl-CoA oxidase [EC:1.3.3.6]
sw14881	sw14881	1.0208	0.837	0.7882	3.9223		K01897	ACSL, fadD; long-chain acyl-CoA synthetase [EC:6.2.1.3]
sw16181	sw16181	1.1254	0.7784	0.6024	3.4545		K11517	HAO; (S)-2-hydroxy-acid oxidase [EC:1.1.3.15]
sw22869	sw22869	1.2334	1.5092	2.1167	0.8356		K13355	NUDT19; nucleoside diphosphate-linked moiety X motif 19, mitochondrial [EC:3.6.1.-]

## Sheet: 8-Insulin signalling
KEGG pathway and Probe	Probe	12 Hat	24 Hat	36 Hat	48 Hat		KEGG ID	Probe KEGG annotation
Insulin secretion
sw01653	sw01653	1.0229	1.0587	1.3412	2.403		K07299	SLC2A1, GLUT1; MFS transporter, SP family, solute carrier family 2 (facilitated glucose transporter), member 1
sw03233	sw03233	0.7991	1.3125	1.8812	2.3192		K01540	ATP1B; sodium/potassium-transporting ATPase subunit beta
sw03660	sw03660	1.044	1.0909	0.9926	0.2045		K04515	CAMK2; calcium/calmodulin-dependent protein kinase (CaM kinase) II [EC:2.7.11.17]
sw17981	sw17981	1.119	1.2039	1.7593	0.4719		K05858	PLCB; phosphatidylinositol phospholipase C, beta [EC:3.1.4.11]
sw18497	sw18497	0.8455	1.3573	2.3186	2.4727		K01540	ATP1B; sodium/potassium-transporting ATPase subunit beta
Insulin signaling pathway
sw00652	sw00652	1.1283	1.1094	1.194	2.1431		K05695	PTPRF, LAR; receptor-type tyrosine-protein phosphatase F [EC:3.1.3.48]
sw00653	sw00653	1.1979	1.0635	2.279	1.1843		K05695	PTPRF, LAR; receptor-type tyrosine-protein phosphatase F [EC:3.1.3.48]
sw04448	sw04448	1.4673	0.9986	1.2304	3.838		K03841	FBP, fbp; fructose-1,6-bisphosphatase I [EC:3.1.3.11]
sw12555	sw12555	1.5531	1.4916	4.7296	1.6462		K00665	FASN; fatty acid synthase, animal type [EC:2.3.1.85]
sw14127	sw14127	1.6674	1.4515	1.3393	2.1532		K07189	PPP1R3; protein phosphatase 1, regulatory (inhibitor) subunit 3
sw15045	sw15045	1.1073	1.7174	0.8641	0.0957		K00871	PHKG; phosphorylase kinase gamma subunit [EC:2.7.11.19]
sw20168	sw20168	0.9375	0.8293	61.5891	1.3157		K00665	FASN; fatty acid synthase, animal type [EC:2.3.1.85]
sw20525	sw20525	1.6413	1.1865	1.6106	4.3808		K04527	INSR; insulin receptor [EC:2.7.10.1]
sw20784	sw20784	1.2053	1.2788	1.3183	2.8477		K00688	E2.4.1.1, glgP, PYG; starch phosphorylase [EC:2.4.1.1]
sw21070	sw21070	0.8833	1.4798	1.5383	0.2468		K04739	PRKAR; cAMP-dependent protein kinase regulator
PI3K-Akt signaling pathway
sw01258	sw01258	0.9971	1.1865	1.4967	4.5958		K06240	LAMA3_5; laminin, alpha 3/5
sw01358	sw01358	1.4876	1.0004	1.0609	0.3321		K03900	VWF; von Willebrand factor
sw01668	sw01668	0.7836	1.7745	4.0313	5.195		K09487	HSP90B, TRA1; heat shock protein 90kDa beta
sw07873	sw07873	0.9349	1.0693	1.8668	6.1066		K05636	LAMB1; laminin, beta 1
sw08684	sw08684	0.9498	0.8099	1.0285	12.7543		K06237	COL4A; collagen, type IV, alpha
sw09820	sw09820	0.9593	1.3793	2.5151	2.4275		K09487	HSP90B, TRA1; heat shock protein 90kDa beta
sw11565	sw11565	1.0651	1.1209	1.661	5.0514		K05636	LAMB1; laminin, beta 1
sw14147	sw14147	0.9839	0.8152	1.5057	5.3177		K05635	LAMC1; laminin, gamma 1
sw15794	sw15794	1.1323	1.4963	1.7472	9.8227		K04659	THBS2S; thrombospondin 2/3/4/5
sw16006	sw16006	1.2926	1.0653	1.9885	4.7389		K06240	LAMA3_5; laminin, alpha 3/5
sw17383	sw17383	0.9228	0.8173	0.8797	8.2784		K06237	COL4A; collagen, type IV, alpha
sw18286	sw18286	1.1987	0.9766	1.1607	0.4542		K05719	ITGB1; integrin beta 1
sw20525	sw20525	1.6413	1.1865	1.6106	4.3808		K04527	INSR; insulin receptor [EC:2.7.10.1]
sw21416	sw21416	0.7788	1.1975	2.0094	1.1265		K03456	PPP2R1; protein phosphatase 2 (formerly 2A), regulatory subunit A
sw21948	sw21948	1.1646	1.0847	1.0726	0.1852		K16197	YWHAB_Q_Z; 14-3-3 protein beta/theta/zeta
